# Supplementary material
Source: ML conference proceedings conference paper supplement (https://aclanthology.org/2022.aacl-main.29)
Supplement: Dataset [file 2022.aacl-main.29.Dataset.zip]

Archive with 28 entries (24 files):
- NEmoP/
- NEmoP/.DS_Store
- __MACOSX/NEmoP/._.DS_Store
- NEmoP/NEmoP-Consensus/
- NEmoP/NEmoP.csv
- __MACOSX/NEmoP/._NEmoP.csv
- NEmoP/README.pdf
- __MACOSX/NEmoP/._README.pdf
- NEmoP/NEmoP-Consensus/NEmoP-CE/
- NEmoP/NEmoP-Consensus/.DS_Store
- __MACOSX/NEmoP/NEmoP-Consensus/._.DS_Store
- NEmoP/NEmoP-Consensus/NEmoP-CR/
- NEmoP/NEmoP-Consensus/NEmoP-CE/.DS_Store
- __MACOSX/NEmoP/NEmoP-Consensus/NEmoP-CE/._.DS_Store
- NEmoP/NEmoP-Consensus/NEmoP-CE/NEmoP-CE-I.csv
- __MACOSX/NEmoP/NEmoP-Consensus/NEmoP-CE/._NEmoP-CE-I.csv
- NEmoP/NEmoP-Consensus/NEmoP-CE/NEmoP-CE-T.csv
- __MACOSX/NEmoP/NEmoP-Consensus/NEmoP-CE/._NEmoP-CE-T.csv
- NEmoP/NEmoP-Consensus/NEmoP-CE/NEmoP-CE-TI.csv
- __MACOSX/NEmoP/NEmoP-Consensus/NEmoP-CE/._NEmoP-CE-TI.csv
- NEmoP/NEmoP-Consensus/NEmoP-CR/.DS_Store
- __MACOSX/NEmoP/NEmoP-Consensus/NEmoP-CR/._.DS_Store
- NEmoP/NEmoP-Consensus/NEmoP-CR/NEmoP-CR-T.csv
- __MACOSX/NEmoP/NEmoP-Consensus/NEmoP-CR/._NEmoP-CR-T.csv
- NEmoP/NEmoP-Consensus/NEmoP-CR/NEmoP-CR-TI.csv
- __MACOSX/NEmoP/NEmoP-Consensus/NEmoP-CR/._NEmoP-CR-TI.csv
- NEmoP/NEmoP-Consensus/NEmoP-CR/NEmoP-CR-I.csv
- __MACOSX/NEmoP/NEmoP-Consensus/NEmoP-CR/._NEmoP-CR-I.csv
