# Supplementary material
Source: ML conference proceedings conference paper supplement (https://aclanthology.org/2022.aacl-main.29)
Supplement: Dataset [file 2022.aacl-main.29.Dataset.zip › NEmoP/NEmoP-Consensus/NEmoP-CE/NEmoP-CE-I.csv]

	Headline	url	image_responses
0	Man accused of shooting at black teenager who knocked on his door to ask for directions	anonymous-source/all_shooting_images_newest/10477.jpg	[{'emotion': 'Disgust', 'intensity': '4', 'reason': 'I just feel that this person is the criminal.'}, {'emotion': 'Fear', 'intensity': '2', 'reason': 'looks like the person was involved in gun violence '}, {'emotion': 'Fear', 'intensity': '4', 'reason': "the person and the style of the photo taken looks like he's a convict"}, {'emotion': 'Fear', 'intensity': '4', 'reason': "I live in America now,…
4	No safe haven as shootings rock US schools	anonymous-source/all_shooting_images_newest/10827.jpg	[{'emotion': 'Sadness', 'intensity': '2', 'reason': 'Shooting probably already happened, policeman are coming to clear the mess.'}, {'emotion': 'Sadness', 'intensity': '4', 'reason': 'knowing there are school shootings that happen frequently, seeing something like this would definitely make me sad'}, {'emotion': 'Anger', 'intensity': '3', 'reason': 'This reminds me of the Rancho Tehama school sho…
5	Trump says close to finalizing effective ban on gun bump stocks	anonymous-source/all_shooting_images_newest/100422.jpg	[{'emotion': 'Contentment', 'intensity': '3', 'reason': "The design looks good, but I don't think it relate to gun violence."}, {'emotion': 'Fear', 'intensity': '4', 'reason': "I believe civilian possession of guns should be regulated strictly, so I'm scared of any mentions of guns and violence surrounding around it "}, {'emotion': 'Fear', 'intensity': '3', 'reason': 'guns in reality (vs. guns in…
7	Pittsburgh synagogue shooting: Portraits of the 11 victims	anonymous-source/all_shooting_images_newest/100385.jpg	[{'emotion': 'Sadness', 'intensity': '3', 'reason': 'Innocent people have been murdered by gun violence.'}, {'emotion': 'Sadness', 'intensity': '4', 'reason': 'looks like these people went through a terrible loss of someone close because of gun violence '}, {'emotion': 'Sadness', 'intensity': '4', 'reason': 'this makes me think of the victims of gun violence'}, {'emotion': 'Sadness', 'intensity':…
8	Adult, juvenile charged in BB gun incident that prompted Elgin school to go into 'secure' mode	anonymous-source/all_shooting_images_newest/413.jpg	[{'emotion': 'Fear', 'intensity': '3', 'reason': 'What if innocent children have been related to the gun violence.'}, {'emotion': 'Sadness', 'intensity': '3', 'reason': "schools being a common target of gun violence is one of the most saddening truths of today's era "}, {'emotion': 'Fear', 'intensity': '1', 'reason': "I don't know that happened at this school but I fear that it is another school …
12	Trump urges lawmakers to buck NRA every once in a while	anonymous-source/all_shooting_images_newest/10336.jpg	[{'emotion': 'Anger', 'intensity': '4', 'reason': 'Politicians do not care about the gun control.'}, {'emotion': 'Disgust', 'intensity': '3', 'reason': "Donald Trump shouldn't be allowed to speak to public and it's disgusting to see him have an opinion on gun control"}, {'emotion': 'Anger', 'intensity': '3', 'reason': 'looking at donald trump always reminds me of how he framed the covid and chine…
16	Hundreds of Malibu students and their families march against gun violence, call for stricter gun control laws	anonymous-source/all_shooting_images_newest/10475.jpg	[{'emotion': 'Sadness', 'intensity': '2', 'reason': 'It makes me feel the aftermath of gun violence.'}, {'emotion': 'Sadness', 'intensity': '3', 'reason': "no one shouldn't have to go through this kind of pain"}, {'emotion': 'Sadness', 'intensity': '3', 'reason': "I'm sad because this is supposed to appear in places like government offices, instead of on the walls that no policymakers will see or…
17	Pittsburgh shooting: US Muslim groups raise more than $110,000 for synagogue attack victims	anonymous-source/all_shooting_images_newest/100398.jpg	[{'emotion': 'Sadness', 'intensity': '2', 'reason': 'It makes me feel the aftermath of gun violence.'}, {'emotion': 'Sadness', 'intensity': '3', 'reason': "This looks really awful and no one shouldn't have to go through this pain"}, {'emotion': 'Sadness', 'intensity': '3', 'reason': 'I feel sad when people die, but at the same time, how people care about and remember the passed makes me less sad'…
18	Texas school district accepts gun donations 2 months after deadly school shooting	anonymous-source/all_shooting_images_newest/463.jpg	[{'emotion': 'Sadness', 'intensity': '2', 'reason': 'It makes me feel the aftermath of gun violence.'}, {'emotion': 'Fear', 'intensity': '3', 'reason': "looks like a school case of violence and that's very scary for me"}, {'emotion': 'Fear', 'intensity': '3', 'reason': "something traumatic clearly happened to the girl and it makes me scared to think it's possibly a shooting at this school"}, {'em…
27	Chicago police chief calls 58 shootings in 3 days 'tragic, senseless and cowardly'	anonymous-source/all_shooting_images_newest/259.jpg	[{'emotion': 'Fear', 'intensity': '3', 'reason': 'Fear'}, {'emotion': 'Fear', 'intensity': '3', 'reason': 'I hope that everyone at that subway was safe and I am scared that there was a shooting there.'}, {'emotion': 'Anger', 'intensity': '2', 'reason': "While I don't fully know the context of the picture, I imagine the police officer is acting inappropriately at the scene of a crime"}, {'emotion'…
28	Bank of America to stop lending to military-style weapons makers	anonymous-source/all_shooting_images_newest/10391.jpg	[{'emotion': 'Contentment', 'intensity': '3', 'reason': 'Contentment'}, {'emotion': 'Contentment', 'intensity': '3', 'reason': 'I am not sure what Bank of America has to do with gun violence.'}, {'emotion': 'Contentment', 'intensity': '1', 'reason': 'I feel rather indifferent to this bank and its title'}, {'emotion': 'Fear', 'intensity': '4', 'reason': 'I feel afraid because of how people can be …
32	SNL,' with Alec Baldwin as Trump, addresses gun control after Parkland school shooting	anonymous-source/all_shooting_images_newest/10734.jpg	[{'emotion': 'Amusement', 'intensity': '3', 'reason': 'Amusement'}, {'emotion': 'Amusement', 'intensity': '3', 'reason': 'SNL can be funny sometimes.'}, {'emotion': 'Disgust', 'intensity': '2', 'reason': "I don't generally find parodies of these political figures funny."}, {'emotion': 'Amusement', 'intensity': '5', 'reason': 'I am happy because people are highlighting the absurdness of presidents…
36	Gun Control Groups Eclipse N.R.A. in Election Spending	anonymous-source/all_shooting_images_newest/110462.jpg	[{'emotion': 'Sadness', 'intensity': '3', 'reason': 'Sadness\r\n'}, {'emotion': 'Excitement', 'intensity': '3', 'reason': 'Hopefully we will have more gun safety laws.'}, {'emotion': 'Contentment', 'intensity': '4', 'reason': 'I am always glad to see members of different generations fighting for stricter gun laws.'}, {'emotion': 'Excitement', 'intensity': '4', 'reason': 'I feel joy that of people…
37	Shooting at esports event in Florida raises calls for more security	anonymous-source/all_shooting_images_newest/313.jpg	[{'emotion': 'Fear', 'intensity': '3', 'reason': 'Fear'}, {'emotion': 'Fear', 'intensity': '3', 'reason': 'Fear because the police are involved. '}, {'emotion': 'Fear', 'intensity': '2', 'reason': 'I worry about the underprivileged people living in this area and what could happen to them'}, {'emotion': 'Sadness', 'intensity': '5', 'reason': 'I feel afraid of the people that use guns to harm peopl…
38	Pro-gun Georgia lawmakers punish Delta for crossing the NRA	anonymous-source/all_shooting_images_newest/10722.jpg	[{'emotion': 'Anger', 'intensity': '3', 'reason': 'Anger'}, {'emotion': 'Anger', 'intensity': '3', 'reason': 'Pro-gun lawmakers should not be punishing delta.'}, {'emotion': 'Amusement', 'intensity': '3', 'reason': "I think it's somewhat funny that the Pro-gun lawmakers were no happy with this."}, {'emotion': 'Anger', 'intensity': '4', 'reason': 'I feel anger at people that use their influence to…
39	Township objects to proposed new rules for Kendall County shooting ranges	anonymous-source/all_shooting_images_newest/100165.jpg	[{'emotion': 'Contentment', 'intensity': '3', 'reason': 'Contentment\r\n'}, {'emotion': 'Fear', 'intensity': '3', 'reason': 'I hope they are fighting for gun safety but I fear they are not.'}, {'emotion': 'Contentment', 'intensity': '1', 'reason': 'I do not know the context of the image'}, {'emotion': 'Sadness', 'intensity': '4', 'reason': 'I feel sad about people that do not take gun violence se…
44	Judge blocks distribution of 3D-printed gun blueprints until case is resolved	anonymous-source/all_shooting_images_newest/128.jpg	[{'emotion': 'Fear', 'intensity': '4', 'reason': 'Looks like a 3D printed gun. With that new technology, it will be easier to make guns, even if they cannot do much damage they still have the potential to hurt people '}, {'emotion': 'Contentment', 'intensity': '1', 'reason': "I feel like the next best thing if gun rights cannot be changed, is better training and protocols put in place to make sur…
45	'Stay in your lane': Doctors fire back at the NRA over guns	anonymous-source/all_shooting_images_newest/110065.jpg	[{'emotion': 'Fear', 'intensity': '3', 'reason': 'I am confused as to why gun stores have to sell weapons of mass destruction. An AK47 is much different than a handgun. Why do people need such big guns?'}, {'emotion': 'Fear', 'intensity': '1', 'reason': "I've been inside a store that sells rifles for hunting. The gun on the counter makes me feel especially scared because of the color and size. it…
48	Bank of America to Stop Financing Makers of Military-Style Guns	anonymous-source/all_shooting_images_newest/10755.jpg	[{'emotion': 'Fear', 'intensity': '2', 'reason': 'Seems like somewhere you could be held at gun point if no one was around'}, {'emotion': 'Fear', 'intensity': '3', 'reason': 'the image looks sketchy. I would do my best to not put myself in a potentially dangerous situation, like using an ATM at night.'}, {'emotion': 'Disgust', 'intensity': '3', 'reason': 'i imagine a robbery which is upsetting'},…
51	After He Subdued a Shooting Suspect, an Armed, Black Security Guard Is Killed by Responding Police	anonymous-source/all_shooting_images_newest/110361.jpg	[{'emotion': 'Contentment', 'intensity': '2', 'reason': 'Not sure how this relates to gun violence, I just see a selfie'}, {'emotion': 'Sadness', 'intensity': '2', 'reason': "this seems to be the photo of a victim. I think that because the photo seems older and has a personality (he's at a piano so maybe he plays piano)."}, {'emotion': 'Sadness', 'intensity': '3', 'reason': 'i assume this is a vi…
57	3 drivers say man charged in 'stand your ground' shooting death threatened them	anonymous-source/all_shooting_images_newest/391.jpg	[{'emotion': 'Fear', 'intensity': '5', 'reason': 'it looks like the man on the ground is begging for his life which is scary because it demonstrates the lack of empathy the shooter has (given the context of gun violence) '}, {'emotion': 'Fear', 'intensity': '4', 'reason': "I don't know the full context of what is going on but the elements in the photo make me scared (someone fleeing, someone on t…
64	Pittsburgh shooting: Trump says synagogue attack has little to do with gun laws	anonymous-source/all_shooting_images_newest/100272.jpg	[{'emotion': 'Anger', 'intensity': '3', 'reason': 'I feel like Trump was on the news too much and that made other people riled up.'}, {'emotion': 'Disgust', 'intensity': '5', 'reason': 'Again, just a terrible man who should have never gotten to the position he did. '}, {'emotion': 'Anger', 'intensity': '3', 'reason': "trump looks nonchalant about anything that he's talking about"}, {'emotion': 'D…
65	3D Printing Vs Gun Control: Navigating The Paradox Analysis	anonymous-source/all_shooting_images_newest/90478.jpg	[{'emotion': 'Amusement', 'intensity': '2', 'reason': 'sad'}, {'emotion': 'Fear', 'intensity': '3', 'reason': 'I would want to know the context in which guns are being mentioned. We, as citizens should be aware of gun violence related happenings around us. '}, {'emotion': 'Disgust', 'intensity': '3', 'reason': 'so straightforward lol. just think it should be somehow limited'}, {'emotion': 'Fear',…
70	Griffith student charged with accidentally bringing loaded gun inside high school	anonymous-source/all_shooting_images_newest/10112.jpg	[{'emotion': 'Disgust', 'intensity': '4', 'reason': 'sad'}, {'emotion': 'Sadness', 'intensity': '3', 'reason': "I would not know how to respond this without more context. It's very sad if this person's a victim of gun violence"}, {'emotion': 'Sadness', 'intensity': '2', 'reason': 'looks like a criminal that was arrested'}, {'emotion': 'Fear', 'intensity': '5', 'reason': "The idea that someone cou…
75	The Kentucky Kroger shooting may have been a racist attack	anonymous-source/all_shooting_images_newest/100001.jpg	[{'emotion': 'Awe', 'intensity': '3', 'reason': 'sad'}, {'emotion': 'Fear', 'intensity': '3', 'reason': 'I would want to know the context in which guns are being mentioned. We, as citizens should be aware of gun violence related happenings around us. '}, {'emotion': 'Fear', 'intensity': '3', 'reason': 'guns can kill lives so easily'}, {'emotion': 'Disgust', 'intensity': '4', 'reason': 'Someone cr…
78	School shootings will scar a generation of students	anonymous-source/all_shooting_images_newest/10732.jpg	[{'emotion': 'Sadness', 'intensity': '1', 'reason': 'sad'}, {'emotion': 'Anger', 'intensity': '3', 'reason': "it's really sad that schools and kids get are such common targets of gun violence "}, {'emotion': 'Contentment', 'intensity': '2', 'reason': "students' security should be guaranteed"}, {'emotion': 'Fear', 'intensity': '5', 'reason': 'Again, school shootings are becoming a little too natur…
80	Retired firefighter found guilty for shooting at lost black teen on doorstep	anonymous-source/all_shooting_images_newest/100223.jpg	[{'emotion': 'Fear', 'intensity': '3', 'reason': 'Accompanied by gun violence, casualties will inevitably result.'}, {'emotion': 'Anger', 'intensity': '4', 'reason': 'he is shooting an animal '}, {'emotion': 'Fear', 'intensity': '2', 'reason': 'this would scare me so badly if it was in my neighborhood'}, {'emotion': 'Fear', 'intensity': '1', 'reason': 'typically places of lower income have more g…
81	Kroger shooting in Kentucky is being investigated as a hate crime	anonymous-source/all_shooting_images_newest/100460.jpg	[{'emotion': 'Sadness', 'intensity': '3', 'reason': 'Accompanied by gun violence, casualties will inevitably result.'}, {'emotion': 'Fear', 'intensity': '4', 'reason': 'I feel like this woman got killed'}, {'emotion': 'Sadness', 'intensity': '3', 'reason': 'these people probably died from gun violence and it makes me sad'}, {'emotion': 'Sadness', 'intensity': '3', 'reason': 'these feel like pictu…
85	New research debunks cherry-picked pro-gun control study the mainstream media routinely cite	anonymous-source/all_shooting_images_newest/90025.jpg	[{'emotion': 'Disgust', 'intensity': '3', 'reason': 'I hope not to sell guns.'}, {'emotion': 'Anger', 'intensity': '4', 'reason': 'this seems like a photo for gun advocates'}, {'emotion': 'Disgust', 'intensity': '1', 'reason': "I don't think automatic guns should be accessible to people at all"}, {'emotion': 'Fear', 'intensity': '4', 'reason': "I feel more fearful around people with guns who have…
87	Video of Columbine Massacre Shown in School for Active Shooter Training	anonymous-source/all_shooting_images_newest/10508.jpg	[{'emotion': 'Fear', 'intensity': '3', 'reason': 'Accompanied by gun violence, casualties will inevitably result.'}, {'emotion': 'Fear', 'intensity': '4', 'reason': 'I feel like something bad is going to happen '}, {'emotion': 'Disgust', 'intensity': '5', 'reason': "the Columbine shooting affected me so much and made me so fearful in high school it disgusts me now I don't know how they could have…
90	Robert Bowers: anti-Semite, anti-migrant and gun fanatic	anonymous-source/all_shooting_images_newest/100227.jpg	[{'emotion': 'Anger', 'intensity': '3', 'reason': 'Accompanied by gun violence, casualties will inevitably result.'}, {'emotion': 'Fear', 'intensity': '3', 'reason': 'he seems to killed someone '}, {'emotion': 'Disgust', 'intensity': '2', 'reason': "I don't know who this is but he looks suspicious "}, {'emotion': 'Fear', 'intensity': '2', 'reason': 'you never know who is capable of having a gun s…
91	California bar massacre leaves another American community reeling after 12 gunned down by Marine veteran	anonymous-source/all_shooting_images_newest/110043.jpg	[{'emotion': 'Sadness', 'intensity': '3', 'reason': 'Accompanied by gun violence, casualties will inevitably result.'}, {'emotion': 'Sadness', 'intensity': '3', 'reason': 'their family might have died'}, {'emotion': 'Sadness', 'intensity': '2', 'reason': 'this looks like a group of people mourning an unexpected loss to gun violence'}, {'emotion': 'Sadness', 'intensity': '3', 'reason': 'families s…
96	As US midterms approach, moms hit the trail to preach gun control	anonymous-source/all_shooting_images_newest/100152.jpg	[{'emotion': 'Contentment', 'intensity': '3', 'reason': 'More and more people are aware of the dangers of gun violence.'}, {'emotion': 'Excitement', 'intensity': '1', 'reason': 'I cannot relate with this picture'}, {'emotion': 'Contentment', 'intensity': '1', 'reason': "I don't know who this is"}, {'emotion': 'Contentment', 'intensity': '3', 'reason': 'figures who seem gentle and nice make me mor…
97	Trump on Florida shooting: Classmates, neighbors should have reported gunman Nikolas Cruz	anonymous-source/all_shooting_images_newest/10550.jpg	[{'emotion': 'Sadness', 'intensity': '3', 'reason': 'Accompanied by gun violence, casualties will inevitably result.'}, {'emotion': 'Awe', 'intensity': '4', 'reason': 'something bad might have happened to them '}, {'emotion': 'Sadness', 'intensity': '4', 'reason': 'it reminds me of gun violence tragedies and makes me sad because no one should have to go through this kind of pain'}, {'emotion': 'S…
100	College instructor creates Second Amendment zone to segregate gun carriers it doesn t go over well	anonymous-source/all_shooting_images_newest/411.jpg	[{'emotion': 'Fear', 'intensity': '3', 'reason': 'A trebuchet'}, {'emotion': 'Anger', 'intensity': '3', 'reason': 'this makes me mad because people like these are the reason that shootings happen'}, {'emotion': 'Disgust', 'intensity': '2', 'reason': 'I feel like people think that owning guns are really cool which is not true'}, {'emotion': 'Fear', 'intensity': '3', 'reason': 'Accompanied by gun v…
101	Trump Briefly Responds To Santa Fe School Shooting Before Pivoting	anonymous-source/all_shooting_images_newest/10120.jpg	[{'emotion': 'Anger', 'intensity': '3', 'reason': 'bad thing'}, {'emotion': 'Disgust', 'intensity': '3', 'reason': 'I do not like him'}, {'emotion': 'Disgust', 'intensity': '2', 'reason': 'when I think of gun control, I think of Donald trump in some ways'}, {'emotion': 'Excitement', 'intensity': '3', 'reason': 'More and more people are aware of the dangers of gun violence.'}, {'emotion': 'Disgust…
104	Gun manufacturer waited months to warn the public its pistol could fire when dropped	anonymous-source/all_shooting_images_newest/10354.jpg	[{'emotion': 'Fear', 'intensity': '3', 'reason': 'A trebuchet'}, {'emotion': 'Disgust', 'intensity': '1', 'reason': "I don't know the purpose of this photo but it can't be good "}, {'emotion': 'Fear', 'intensity': '4', 'reason': 'this pic gives me a more vivd pic of what gun violence is like '}, {'emotion': 'Disgust', 'intensity': '3', 'reason': 'I hope not to sell guns.'}, {'emotion': 'Fear', 'i…
105	Trump backs effort to improve gun background checks	anonymous-source/all_shooting_images_newest/10106.jpg	[{'emotion': 'Sadness', 'intensity': '3', 'reason': 'crying'}, {'emotion': 'Sadness', 'intensity': '2', 'reason': 'i feel bad for her and everything that she went through '}, {'emotion': 'Sadness', 'intensity': '4', 'reason': "gun violence did take away lot of people's life "}, {'emotion': 'Anger', 'intensity': '3', 'reason': 'Accompanied by gun violence, casualties will inevitably result.'}, {'e…
106	Las Vegas Shooting: Retired Carpenter Builds New Memorial of 58 Crosses Ahead of Anniversary	anonymous-source/all_shooting_images_newest/90220.jpg	[{'emotion': 'Sadness', 'intensity': '3', 'reason': 'respect'}, {'emotion': 'Sadness', 'intensity': '1', 'reason': 'it makes me sad to see all of those crosses'}, {'emotion': 'Sadness', 'intensity': '4', 'reason': "gun violence did take away lot of people's life "}, {'emotion': 'Sadness', 'intensity': '3', 'reason': 'Accompanied by gun violence, casualties will inevitably result.'}, {'emotion': '…
107	After California shooting, Democrats vow to tackle gun violence | Fox News	anonymous-source/all_shooting_images_newest/110511.jpg	[{'emotion': 'Fear', 'intensity': '3', 'reason': 'The scene of the accident'}, {'emotion': 'Fear', 'intensity': '1', 'reason': 'it scares me because it looks like something horrible is going on and if were to show up on the news then i would be very concerned. '}, {'emotion': 'Fear', 'intensity': '4', 'reason': 'this makes me feel like gun violence do exists in our life'}, {'emotion': 'Anger', 'i…
109	Oak Park Township voters overwhelmingly support firearm storage referendum	anonymous-source/all_shooting_images_newest/110231.jpg	[{'emotion': 'Contentment', 'intensity': '3', 'reason': 'right to vote'}, {'emotion': 'Contentment', 'intensity': '2', 'reason': 'i have a positive view on voting and believe that it will be our best bet to tackling gun violence '}, {'emotion': 'Disgust', 'intensity': '3', 'reason': 'I feel like this is just a political campaign '}, {'emotion': 'Contentment', 'intensity': '3', 'reason': 'More and…
110	3D-Printed Guns Are Unchecked and Untraceable. And a Judge Blocked Them at the Last Minute	anonymous-source/all_shooting_images_newest/417.jpg	[{'emotion': 'Fear', 'intensity': '3', 'reason': 'A trebuchet'}, {'emotion': 'Disgust', 'intensity': '1', 'reason': "I don't know who he is or what is going on but something about him disgusts me "}, {'emotion': 'Fear', 'intensity': '4', 'reason': 'the background is our everyday life feels more real'}, {'emotion': 'Disgust', 'intensity': '3', 'reason': 'Accompanied by gun violence, casualties wil…
113	White male 'gun nuts' are 'biggest terrorist organization on the planet,' Tennessee Dem ally wrote online: report	anonymous-source/all_shooting_images_newest/100461.jpg	[{'emotion': 'Sadness', 'intensity': '4', 'reason': 'The victim'}, {'emotion': 'Contentment', 'intensity': '1', 'reason': "I don't know who that is or the context of this"}, {'emotion': 'Fear', 'intensity': '3', 'reason': '/'}, {'emotion': 'Sadness', 'intensity': '3', 'reason': 'Accompanied by gun violence, casualties will inevitably result.'}, {'emotion': 'Fear', 'intensity': '1', 'reason': 'it …
116	The Latest: Victim's family marks anniversary of shooting	anonymous-source/all_shooting_images_newest/90248.jpg	[{'emotion': 'Sadness', 'intensity': '3', 'reason': 'stay strong'}, {'emotion': 'Contentment', 'intensity': '2', 'reason': 'this is sweet and it makes me feel good that they did this '}, {'emotion': 'Contentment', 'intensity': '4', 'reason': "finally there's someone or some organization and handle this topic and maybe make some changes in the future"}, {'emotion': 'Contentment', 'intensity': '3',…
117	Florida Yoga Studio Shooting Suspect Was A Far-Right Misogynist	anonymous-source/all_shooting_images_newest/110513.jpg	[{'emotion': 'Fear', 'intensity': '3', 'reason': 'The scene of the accident'}, {'emotion': 'Fear', 'intensity': '3', 'reason': "this looks like a scary situation and in this context it makes me feel like something really bad happened but i'm not sure what so i'm scared"}, {'emotion': 'Fear', 'intensity': '2', 'reason': 'something might happened '}, {'emotion': 'Fear', 'intensity': '3', 'reason': …
120	Suspect In Fatal Kroger Shooting First Tried To Get Inside Black Church: Police	anonymous-source/all_shooting_images_newest/100083.jpg	[{'emotion': 'Fear', 'intensity': '4', 'reason': 'Rich facial expression '}, {'emotion': 'Fear', 'intensity': '3', 'reason': 'He looks so terrifying'}, {'emotion': 'Fear', 'intensity': '5', 'reason': 'im scared of the look on his face he looks dangerous'}, {'emotion': 'Fear', 'intensity': '3', 'reason': "I don't who this guy is but he looks guilty"}, {'emotion': 'Contentment', 'intensity': '3', '…
121	Aurora cross man gets helping hearts from Covenant students for Las Vegas shooting anniversary trip	anonymous-source/all_shooting_images_newest/100103.jpg	[{'emotion': 'Sadness', 'intensity': '2', 'reason': 'Feeling of empathy '}, {'emotion': 'Sadness', 'intensity': '3', 'reason': 'it makes me so sad to see this heart'}, {'emotion': 'Sadness', 'intensity': '4', 'reason': 'the sadness of mourning a loved one is the most painful experience'}, {'emotion': 'Sadness', 'intensity': '4', 'reason': 'I would assume he lost his child/a loved one to gun viole…
127	Mom: Thanks to active-shooter drills at school, my 4-year-old thought fireworks were gunshots. Enough already.	anonymous-source/all_shooting_images_newest/110494.jpg	[{'emotion': 'Sadness', 'intensity': '3', 'reason': 'Sense of empathy '}, {'emotion': 'Sadness', 'intensity': '3', 'reason': 'This world is beautiful because of most kind people'}, {'emotion': 'Sadness', 'intensity': '3', 'reason': 'people mourning is so painful'}, {'emotion': 'Sadness', 'intensity': '4', 'reason': 'She looks like she lost someone'}, {'emotion': 'Contentment', 'intensity': '3', '…
130	Synagogue shooter 'listened to noise and noise told him his people were being slaughtered', says Jewish doctor who spoke to Robert Bowers	anonymous-source/all_shooting_images_newest/100086.jpg	[{'emotion': 'Disgust', 'intensity': '4', 'reason': 'Intense facial expressions '}, {'emotion': 'Fear', 'intensity': '3', 'reason': 'He killed someone or he was killed?'}, {'emotion': 'Disgust', 'intensity': '3', 'reason': 'he looks like he did something bad'}, {'emotion': 'Sadness', 'intensity': '1', 'reason': "I don't know who he is, but he probably did something bad."}, {'emotion': 'Fear', 'in…
134	Police boost patrols at synagogues after Pittsburgh shooting	anonymous-source/all_shooting_images_newest/100409.jpg	[{'emotion': 'Fear', 'intensity': '3', 'reason': 'Sense of insecure '}, {'emotion': 'Awe', 'intensity': '4', 'reason': 'The soldiers make me feel safety'}, {'emotion': 'Awe', 'intensity': '3', 'reason': 'police are there to protect us '}, {'emotion': 'Fear', 'intensity': '2', 'reason': "I don't have exact context but it look serious"}, {'emotion': 'Excitement', 'intensity': '3', 'reason': 'I like…
137	Clippers and Bucks wear T-shirts saying 'Enough' on front, with shooting victims names on back	anonymous-source/all_shooting_images_newest/110506.jpg	[{'emotion': 'Sadness', 'intensity': '3', 'reason': 'Sense of empathy '}, {'emotion': 'Sadness', 'intensity': '3', 'reason': 'I feel so sad for these people, they should not be like this'}, {'emotion': 'Sadness', 'intensity': '3', 'reason': 'this country has had too many memorials'}, {'emotion': 'Sadness', 'intensity': '3', 'reason': "I'm sad this has to be done, but glad that sports players are …
141	New York Today: Survivors of Gun Violence	anonymous-source/all_shooting_images_newest/10428.jpg	[{'emotion': 'Fear', 'intensity': '4', 'reason': 'Intense pictures '}, {'emotion': 'Sadness', 'intensity': '4', 'reason': 'I feel sad for people that are harmed by guns\r\n\r\n'}, {'emotion': 'Fear', 'intensity': '4', 'reason': 'this is so scary '}, {'emotion': 'Sadness', 'intensity': '3', 'reason': 'It makes me think about the pain people have gone through from gun related violence. '}, {'emotio…
144	EA Launches Safety Review in Wake of Jacksonville Shooting	anonymous-source/all_shooting_images_newest/291.jpg	[{'emotion': 'Fear', 'intensity': '3', 'reason': 'No emotions are raised '}, {'emotion': 'Fear', 'intensity': '4', 'reason': 'I feel fear at people that use guns to harm people'}, {'emotion': 'Fear', 'intensity': '4', 'reason': 'tere are police coming around '}, {'emotion': 'Fear', 'intensity': '3', 'reason': 'I do not know what is happening, but it seems like soemone(s) could be in harms way. '}…
147	Hollywood Calls for Gun Control, Urges Voting in Wake of Synagogue Massacre	anonymous-source/all_shooting_images_newest/100492.jpg	[{'emotion': 'Sadness', 'intensity': '3', 'reason': 'Feeling of empathy '}, {'emotion': 'Sadness', 'intensity': '4', 'reason': 'I feel sad for people that are harmed by guns'}, {'emotion': 'Sadness', 'intensity': '4', 'reason': 'people are giving flowers in graveyard'}, {'emotion': 'Sadness', 'intensity': '3', 'reason': 'It reminds me how young children and families are impacted by gun violence. …
150	EA cancels eSports tournament amid security fears after Jacksonville shooting	anonymous-source/all_shooting_images_newest/90.jpg	[{'emotion': 'Sadness', 'intensity': '3', 'reason': 'Rich facial expressions '}, {'emotion': 'Anger', 'intensity': '4', 'reason': 'I feel anger at people that use guns to hurt people'}, {'emotion': 'Fear', 'intensity': '4', 'reason': "I don't knwo what is happening. cant tell any emotions"}, {'emotion': 'Fear', 'intensity': '3', 'reason': 'I do not know who the man in the photo is, but the expres…
151	What to Do When There s an Active Shooter	anonymous-source/all_shooting_images_newest/10464.jpg	[{'emotion': 'Sadness', 'intensity': '3', 'reason': 'Sense of empathy '}, {'emotion': 'Sadness', 'intensity': '4', 'reason': 'I feel sad for people that are harmed by guns'}, {'emotion': 'Sadness', 'intensity': '3', 'reason': 'people are crying '}, {'emotion': 'Sadness', 'intensity': '3', 'reason': 'It seems like something bad has happened, and I feel bad for the people in the photo. '}, {'emotio…
154	Mass Shooting at Florida Esports Event Raises Questions About Security	anonymous-source/all_shooting_images_newest/302.jpg	[{'emotion': 'Excitement', 'intensity': '3', 'reason': 'No emotions raised '}, {'emotion': 'Fear', 'intensity': '4', 'reason': 'I feel fear about people that are harmed by guns because that can also be myself'}, {'emotion': 'Fear', 'intensity': '3', 'reason': 'police are coming around'}, {'emotion': 'Fear', 'intensity': '3', 'reason': 'I am reminded by the fact that police can be both good and ba…
156	Florida politicians consider allowing teachers to carry guns	anonymous-source/all_shooting_images_newest/10622.jpg	[{'emotion': 'Anger', 'intensity': '4', 'reason': 'Rich facial expressions '}, {'emotion': 'Excitement', 'intensity': '4', 'reason': 'I feel excited for people that want to end gun violence'}, {'emotion': 'Excitement', 'intensity': '4', 'reason': 'people are protesting gun '}, {'emotion': 'Excitement', 'intensity': '3', 'reason': 'I am sad that people have to protest gun violence because it is su…
157	Eiffel Tower goes dark to honor Pittsburgh shooting victims	anonymous-source/all_shooting_images_newest/100494.jpg	[{'emotion': 'Sadness', 'intensity': '3', 'reason': 'No emotions are raised '}, {'emotion': 'Sadness', 'intensity': '4', 'reason': 'I feel fear at people that use guns to harm people'}, {'emotion': 'Excitement', 'intensity': '3', 'reason': "I don't know what this represents "}, {'emotion': 'Sadness', 'intensity': '3', 'reason': 'I am reminded of the powerful ways people have mourned victims of gu…
160	Robert Bowers arrest: Pittsburgh synagogue shooting suspect charged with 44 counts including hate crimes	anonymous-source/all_shooting_images_newest/110514.jpg	[{'emotion': 'Sadness', 'intensity': '2', 'reason': 'I did not know who the man was or his relation to gun violence until I looked him up. After looking him up, I felt sad because the story, along with other news about gun violence, made me feel hopeless.'}, {'emotion': 'Disgust', 'intensity': '1', 'reason': 'He might be a perpetrator of gun violence. '}, {'emotion': 'Fear', 'intensity': '3', 're…
161	Donald Trump says Second Amendment 'will never be repealed' following ex-Supreme Court judge's comments	anonymous-source/all_shooting_images_newest/10022.jpg	[{'emotion': 'Disgust', 'intensity': '4', 'reason': 'I feel like former president Trump did not do enough to stop gun violence.'}, {'emotion': 'Disgust', 'intensity': '5', 'reason': "He's spewed hatred and encouraged violence for years. "}, {'emotion': 'Sadness', 'intensity': '3', 'reason': 'it makes me sad how trump perceived himself'}, {'emotion': 'Disgust', 'intensity': '5', 'reason': "I don't…
162	Advocates warn against linking mass shootings, mental illness after Trump tweet	anonymous-source/all_shooting_images_newest/10826.jpg	[{'emotion': 'Fear', 'intensity': '2', 'reason': "I feel like he is smirking, making me feel like he's hiding something."}, {'emotion': 'Disgust', 'intensity': '5', 'reason': "He's a piece of shit. "}, {'emotion': 'Disgust', 'intensity': '3', 'reason': 'his facial expression makes me feel disgusted because he looks disrespectful towards whoever is speaking'}, {'emotion': 'Disgust', 'intensity': '…
163	Trump Suggests Armed Guard Could Have Stopped Pittsburgh Synagogue Shooting	anonymous-source/all_shooting_images_newest/100266.jpg	[{'emotion': 'Disgust', 'intensity': '2', 'reason': 'I think there a lot of people that support the man in the image.'}, {'emotion': 'Disgust', 'intensity': '5', 'reason': "Again, he's a horrible man. "}, {'emotion': 'Sadness', 'intensity': '3', 'reason': 'it makes me sad how many supported Trump has'}, {'emotion': 'Anger', 'intensity': '1', 'reason': "I don't like him but this photo didn't make …
165	Klansman gets 4 years for firing gun at 'Unite the Right' rally	anonymous-source/all_shooting_images_newest/274.jpg	[{'emotion': 'Fear', 'intensity': '4', 'reason': 'I feel like the man in the photo is harming someone with his firearm.'}, {'emotion': 'Anger', 'intensity': '4', 'reason': "Citizens shouldn't have such easy access to lethal weapons of any kind. "}, {'emotion': 'Fear', 'intensity': '3', 'reason': 'a white guy with a bandana, holding a gun scares me and i fear running into someone like this in real…
166	US military adds more than 4,000 names to gun background check database after Texas mass shooting	anonymous-source/all_shooting_images_newest/10461.jpg	[{'emotion': 'Sadness', 'intensity': '5', 'reason': 'death makes me sad.'}, {'emotion': 'Sadness', 'intensity': '3', 'reason': "It's sad that children have lost their lives. "}, {'emotion': 'Sadness', 'intensity': '3', 'reason': "it's sad because it reminds me of the church shooting"}, {'emotion': 'Sadness', 'intensity': '5', 'reason': "those people died for no reason/they weren't meant to die so…
167	Melania Trump on Pittsburgh shooting: The violence needs to stop	anonymous-source/all_shooting_images_newest/100249.jpg	[{'emotion': 'Sadness', 'intensity': '3', 'reason': 'I feel like a lot of people get hurt from gun violence.'}, {'emotion': 'Sadness', 'intensity': '2', 'reason': "Obviously, someone has gotten hurt so that's sad. "}, {'emotion': 'Fear', 'intensity': '3', 'reason': "i'm scared that the ambulance is taking someone got shot to a hospital"}, {'emotion': 'Sadness', 'intensity': '4', 'reason': 'someon…
170	Pittsburgh synagogue shooting suspect indicted on federal hate crime charges, faces 535 years	anonymous-source/all_shooting_images_newest/110518.jpg	[{'emotion': 'Anger', 'intensity': '4', 'reason': 'this person committed a crime that killed a lot of people.'}, {'emotion': 'Disgust', 'intensity': '1', 'reason': 'Same as before, he could be a perpetrator. '}, {'emotion': 'Fear', 'intensity': '3', 'reason': 'it makes me think of the shooters '}, {'emotion': 'Disgust', 'intensity': '4', 'reason': 'the guy looks like a killer'}, {'emotion': 'Disg…
171	Watch Donald Trump, Marco Rubio, and Rick Scott Address the NRA	anonymous-source/all_shooting_images_newest/10027.jpg	[{'emotion': 'Disgust', 'intensity': '4', 'reason': "I feel like a lot of the people who support gun rights don't have a solution to gun violence."}, {'emotion': 'Disgust', 'intensity': '5', 'reason': "He's encouraged and helped the NRA to spew propaganda in favor of less gun control. "}, {'emotion': 'Anger', 'intensity': '3', 'reason': 'how trump helped the nra'}, {'emotion': 'Disgust', 'intensi…
172	Donald Trump Jr. Uses YouTube Shooting To Make Incoherent Rant About The Left	anonymous-source/all_shooting_images_newest/10828.jpg	[{'emotion': 'Disgust', 'intensity': '3', 'reason': "I don't like Donald Trump Jr. and the people he associates with."}, {'emotion': 'Disgust', 'intensity': '5', 'reason': 'No better than his father. '}, {'emotion': 'Anger', 'intensity': '3', 'reason': "I don't know much about trump jr in the context of gun violence"}, {'emotion': 'Disgust', 'intensity': '4', 'reason': "I really don't like the tr…
173	Trump looking into 3D guns, says he s consulting with NRA	anonymous-source/all_shooting_images_newest/347.jpg	[{'emotion': 'Fear', 'intensity': '1', 'reason': "I don't know what those tools are used for and there is nothing in the photo to make me feel any type of way."}, {'emotion': 'Sadness', 'intensity': '1', 'reason': 'Not sure what these are, toys? So not really any of the above feelings. '}, {'emotion': 'Fear', 'intensity': '3', 'reason': "this looks like a flair gun and there's japanese written in…
175	Rohrabacher s allegiance to the NRA is just another reason not to vote for him	anonymous-source/all_shooting_images_newest/10476.jpg	[{'emotion': 'Sadness', 'intensity': '3', 'reason': 'the loss of a friend or family member is always sad to me.'}, {'emotion': 'Sadness', 'intensity': '2', 'reason': 'The death of a loved one is always sad.'}, {'emotion': 'Sadness', 'intensity': '3', 'reason': 'someone died in the context of gun violence and people are mourning as well'}, {'emotion': 'Sadness', 'intensity': '5', 'reason': 'that p…
176	After Pittsburgh synagogue shooting, Squirrel Hill residents shaken but not surprised	anonymous-source/all_shooting_images_newest/100344.jpg	[{'emotion': 'Fear', 'intensity': '2', 'reason': "I don't know what's going on exactly but emergency services make me feel like there is a sense of danger nearby."}, {'emotion': 'Sadness', 'intensity': '2', 'reason': "Someone is obviously hurt, so that's sad. "}, {'emotion': 'Fear', 'intensity': '3', 'reason': 'the soldier scared me as something horrible beyond police happened here'}, {'emotion':…
179	1 in 5 U.S. Gun Owners Use Drugs, Report Mental Health Condition: Survey	anonymous-source/all_shooting_images_newest/10843.jpg	[{'emotion': 'Fear', 'intensity': '4', 'reason': "They aren't holding the guns properly and seem to be carelessly holding them. "}, {'emotion': 'Fear', 'intensity': '3', 'reason': "It's terrifying to see such large guns casually held. "}, {'emotion': 'Fear', 'intensity': '3', 'reason': "It's terrifying to see such large guns casually held. "}, {'emotion': 'Fear', 'intensity': '3', 'reason': 'why …
185	PayPal bans Gab in wake of Pittsburgh mass shooting	anonymous-source/all_shooting_images_newest/100225.jpg	[{'emotion': 'Sadness', 'intensity': '2', 'reason': 'They are grieving'}, {'emotion': 'Sadness', 'intensity': '3', 'reason': 'I feel as though they are praying peacfully for lost victims'}, {'emotion': 'Sadness', 'intensity': '3', 'reason': 'I feel as though they are praying peacfully for lost victims'}, {'emotion': 'Sadness', 'intensity': '3', 'reason': 'guns lead to more violence and sadness'},…
188	Mass shootings 'increasing'and pose'most serious threat' in US, expert says	anonymous-source/all_shooting_images_newest/110490.jpg	[{'emotion': 'Sadness', 'intensity': '2', 'reason': 'they are sad'}, {'emotion': 'Sadness', 'intensity': '3', 'reason': "I feel bad for this person. But I don't know what's happening. "}, {'emotion': 'Sadness', 'intensity': '3', 'reason': "I feel bad for this person. But I don't know what's happening. "}, {'emotion': 'Fear', 'intensity': '3', 'reason': 'school shootings happen so often when it sh…
189	Ban assault weapons, buy them back, go after resisters: Ex-prosecutor in Congress	anonymous-source/all_shooting_images_newest/10883.jpg	[{'emotion': 'Anger', 'intensity': '4', 'reason': 'nobody should be celebrated for committing treason. '}, {'emotion': 'Fear', 'intensity': '3', 'reason': 'WHY is he holding a gun at a public place? And so casually too!'}, {'emotion': 'Fear', 'intensity': '3', 'reason': 'WHY is he holding a gun at a public place? And so casually too!'}, {'emotion': 'Anger', 'intensity': '4', 'reason': 'this looks…
191	Paulette Jordan, Idaho horse-riding, gun-owning Democrat running for governor	anonymous-source/all_shooting_images_newest/244.jpg	[{'emotion': 'Contentment', 'intensity': '2', 'reason': 'she looks like a cool cowboy'}, {'emotion': 'Contentment', 'intensity': '3', 'reason': 'This image is very aesthetically pleasing and beautiful. '}, {'emotion': 'Contentment', 'intensity': '3', 'reason': 'This image is very aesthetically pleasing and beautiful. '}, {'emotion': 'Awe', 'intensity': '3', 'reason': 'not sure what this picture m…
193	As immigrants flow across US border, American guns go south	anonymous-source/all_shooting_images_newest/90158.jpg	[{'emotion': 'Anger', 'intensity': '4', 'reason': 'these weapons have caused so much destruction.'}, {'emotion': 'Fear', 'intensity': '3', 'reason': 'Those are guns that are used to hurt people. '}, {'emotion': 'Fear', 'intensity': '3', 'reason': 'Those are guns that are used to hurt people. '}, {'emotion': 'Fear', 'intensity': '4', 'reason': 'everybody got guns and no one is truly safe'}, {'emot…
194	Thousands head to DC for gun control protest Video	anonymous-source/all_shooting_images_newest/10302.jpg	[{'emotion': 'Sadness', 'intensity': '2', 'reason': 'kids have to worry about their school being a safe place. '}, {'emotion': 'Sadness', 'intensity': '3', 'reason': 'I feel sad but empowered for them'}, {'emotion': 'Sadness', 'intensity': '3', 'reason': 'I feel sad but empowered for them'}, {'emotion': 'Sadness', 'intensity': '3', 'reason': 'guns should not be anywhere near schools'}, {'emotion'…
195	Muslim groups raise money for victims after Pittsburgh synagogue shooting	anonymous-source/all_shooting_images_newest/100230.jpg	[{'emotion': 'Sadness', 'intensity': '4', 'reason': "so many people die when they don't have to. "}, {'emotion': 'Sadness', 'intensity': '3', 'reason': 'Sad but peaceful for the lost ones'}, {'emotion': 'Sadness', 'intensity': '3', 'reason': 'Sad but peaceful for the lost ones'}, {'emotion': 'Sadness', 'intensity': '5', 'reason': 'school shootings are tragic events'}, {'emotion': 'Sadness', 'inte…
198	We have to learn from history : Sex therapist Dr. Ruth speaks out about synagogue shooting, holocaust deniers	anonymous-source/all_shooting_images_newest/110495.jpg	[{'emotion': 'Sadness', 'intensity': '2', 'reason': "I'm not sure how she relates to gun violence. "}, {'emotion': 'Sadness', 'intensity': '3', 'reason': 'I dont know her'}, {'emotion': 'Sadness', 'intensity': '3', 'reason': 'I dont know her'}, {'emotion': 'Awe', 'intensity': '1', 'reason': 'i dont know who this is'}, {'emotion': 'Sadness', 'intensity': '1', 'reason': "I do not know who this woma…
199	Some wanted shooting suspect forcibly committed in 2016	anonymous-source/all_shooting_images_newest/10693.jpg	[{'emotion': 'Anger', 'intensity': '1', 'reason': 'anger because I know this man has taken innocent lives but its mild because this picture leads me to assume that he is being prosecuted'}, {'emotion': 'Sadness', 'intensity': '5', 'reason': 'people waste their lives by doing illegal things'}, {'emotion': 'Anger', 'intensity': '4', 'reason': 'Because of these situations, I have to be very careful …
200	Students call for action after Florida school mass shooting	anonymous-source/all_shooting_images_newest/10015.jpg	[{'emotion': 'Sadness', 'intensity': '2', 'reason': 'I can imagine these students are speaking about gun violence and no child should even have to know what that is'}, {'emotion': 'Contentment', 'intensity': '3', 'reason': 'no emotion detected'}, {'emotion': 'Sadness', 'intensity': '3', 'reason': 'Because with gun violence, people will inevitably be injured or even killed.'}, {'emotion': 'Sadness…
204	Flap over funeral doves prompts arrest of California man, seizure of cache of guns and Nazi paraphernalia	anonymous-source/all_shooting_images_newest/110132.jpg	[{'emotion': 'Disgust', 'intensity': '5', 'reason': "only crazy people with bad intentions would have so many guns I don't understand how this could be a good thing for anybody no one should have so many guns."}, {'emotion': 'Fear', 'intensity': '3', 'reason': 'guns scare me'}, {'emotion': 'Disgust', 'intensity': '3', 'reason': 'I hope not to sell guns.'}, {'emotion': 'Anger', 'intensity': '5', '…
206	Las Vegas shooting: Memorial events mark 1-year anniversary as massacre motive still shrouded in mystery	anonymous-source/all_shooting_images_newest/100424.jpg	[{'emotion': 'Sadness', 'intensity': '4', 'reason': 'this implies that someone has died and that made me really sad'}, {'emotion': 'Sadness', 'intensity': '5', 'reason': 'it portrays people that just lost a friend or family member'}, {'emotion': 'Sadness', 'intensity': '3', 'reason': 'Because with gun violence, people will inevitably be injured or even killed.'}, {'emotion': 'Sadness', 'intensity…
210	Security concerns come to light following shooting outside Mount Sinai Hospital	anonymous-source/all_shooting_images_newest/10023.jpg	[{'emotion': 'Sadness', 'intensity': '3', 'reason': 'the people look really sad and concerned which made me feel sad'}, {'emotion': 'Sadness', 'intensity': '4', 'reason': 'looks like a crime scene'}, {'emotion': 'Fear', 'intensity': '3', 'reason': 'Under national control, gun violence still often occurs, which makes me feel scared.'}, {'emotion': 'Fear', 'intensity': '2', 'reason': 'In the contex…
213	Harwood Heights police conduct active shooter drill at Eisenhower library: 'You have to have a plan'	anonymous-source/all_shooting_images_newest/127.jpg	[{'emotion': 'Disgust', 'intensity': '1', 'reason': "I cant tell what is happening here but I feel disgust because I don't really like how heavily the police are funded yet not trained enough on moments of crisis"}, {'emotion': 'Amusement', 'intensity': '4', 'reason': 'looks more like a movie scene than an actual police activity (the guy in the back is kinda laughing)'}, {'emotion': 'Fear', 'inte…
216	More gun laws won't curb gun crime	anonymous-source/all_shooting_images_newest/100429.jpg	[{'emotion': 'Sadness', 'intensity': '1', 'reason': 'I assume this is a list of people who have died to gun violence and it is too long'}, {'emotion': 'Sadness', 'intensity': '5', 'reason': 'death make me feel sad '}, {'emotion': 'Sadness', 'intensity': '3', 'reason': 'Gun violence is very easy to cause casualties'}, {'emotion': 'Sadness', 'intensity': '2', 'reason': 'This looks like a memorial, …
219	Son Of Witness: Suspect In Fatal Kroger Shooting Said 'Whites Don't Kill Whites'	anonymous-source/all_shooting_images_newest/100236.jpg	[{'emotion': 'Fear', 'intensity': '4', 'reason': 'Stare people'}, {'emotion': 'Fear', 'intensity': '2', 'reason': 'The man seems very upset and menacing. In the context of gun violence, I am unsure if he wants to hurt more people or not, so I am scared.'}, {'emotion': 'Fear', 'intensity': '1', 'reason': "The almost crazed expression on the man's face makes me feel mild fear"}, {'emotion': 'Fear',…
221	The Latest: Trump postpones Penn. rally after shooting	anonymous-source/all_shooting_images_newest/10654.jpg	[{'emotion': 'Awe', 'intensity': '3', 'reason': 'positive energy'}, {'emotion': 'Sadness', 'intensity': '1', 'reason': 'the president was addressing a national tragedy that occurred. The fact that the shooting was so bad that the president had to address it makes me sad. '}, {'emotion': 'Disgust', 'intensity': '3', 'reason': 'As a Florida resident, the last thing I wanted after the Parkland shoot…
226	Let's hope the Salvador Castro Middle School shooting finally wakes up L.A. Unified on school safety	anonymous-source/all_shooting_images_newest/10641.jpg	[{'emotion': 'Fear', 'intensity': '3', 'reason': 'casualties'}, {'emotion': 'Fear', 'intensity': '4', 'reason': 'there seems to be a large police and first responder presence, so I wonder how many people have been hurt.'}, {'emotion': 'Sadness', 'intensity': '2', 'reason': 'I feel pretty sad by the photo as I fear that people may have been hurt or may have been killed'}, {'emotion': 'Sadness', 'i…
229	Kroger grocery store gunman tried to enter predominantly black church before shooting, police say	anonymous-source/all_shooting_images_newest/100251.jpg	[{'emotion': 'Anger', 'intensity': '3', 'reason': 'prisoner'}, {'emotion': 'Fear', 'intensity': '2', 'reason': 'the man looks like he wants to hurt other people even while in police custody'}, {'emotion': 'Disgust', 'intensity': '3', 'reason': 'The man has clearly been alleged to have committed a crime, which makes me feel a moderate amount of disgust'}, {'emotion': 'Fear', 'intensity': '4', 'rea…
230	After back-to-back mass shootings, America grows numb	anonymous-source/all_shooting_images_newest/110105.jpg	[{'emotion': 'Sadness', 'intensity': '3', 'reason': 'crying'}, {'emotion': 'Sadness', 'intensity': '4', 'reason': 'the person is clearly affected by the death of a loved one'}, {'emotion': 'Sadness', 'intensity': '3', 'reason': 'I empathize with the girl crying and thus feel a moderate sadness for she is clearly grieving'}, {'emotion': 'Sadness', 'intensity': '4', 'reason': 'this picture is heart…
234	Last Lockdown' statues part of gun-control group's plan to change minds in pro-gun districts	anonymous-source/all_shooting_images_newest/90135.jpg	[{'emotion': 'Fear', 'intensity': '3', 'reason': 'A trebuchet'}, {'emotion': 'Sadness', 'intensity': '1', 'reason': 'a lot of minors seem to be able to get their hands on these style rifles'}, {'emotion': 'Fear', 'intensity': '4', 'reason': 'Seeing so many semi-automatic rifles lined up inflicts a great deal of fear as I fear the violence they can cause to someone'}, {'emotion': 'Anger', 'intensi…
235	Gays Against Guns claims victory as FedEx ends NRA discount	anonymous-source/all_shooting_images_newest/100338.jpg	[{'emotion': 'Excitement', 'intensity': '3', 'reason': 'protest'}, {'emotion': 'Excitement', 'intensity': '2', 'reason': 'a community has come together to protest something they feel strongly about, and it shows that gun violence affects many communities in America. '}, {'emotion': 'Excitement', 'intensity': '4', 'reason': 'Seeing so many people of the LGBTQ+ community together walking for change…
239	3-D Printed Gun Blueprints Are Back, and Only New Laws Can Stop Them	anonymous-source/all_shooting_images_newest/299.jpg	[{'emotion': 'Fear', 'intensity': '4', 'reason': 'anything in the context of gun violence scares me '}, {'emotion': 'Fear', 'intensity': '1', 'reason': 'his face makes me feel uncomfortable because there seems to be no emotion in it, and in the context of gun violence it makes it unsettling '}, {'emotion': 'Contentment', 'intensity': '2', 'reason': 'his look is funny'}, {'emotion': 'Sadness', 'in…
243	How gun background checks work	anonymous-source/all_shooting_images_newest/10138.jpg	[{'emotion': 'Fear', 'intensity': '5', 'reason': 'that is a weapon that could execute a mass shooting '}, {'emotion': 'Anger', 'intensity': '2', 'reason': "this reminds me of a news feature that another shooting has happened or someone has gotten their hands on another assault rifle that they don't need. I think it's more annoyance than anger because the solution could be so easy, but people are …
245	Teachers who survived shootings at Columbine, Sandy Hook, and Rancho Tehama discuss going back into the classroom.	anonymous-source/all_shooting_images_newest/90037.jpg	[{'emotion': 'Sadness', 'intensity': '5', 'reason': 'because they may have lost their lives in the shooting '}, {'emotion': 'Sadness', 'intensity': '4', 'reason': "this brought tears to my eyes seeing the sandy hook elementary part. It's sad that people died, and I was in school when it happened and I remember the changes and the tension that surrounded the events. Plus the fact that it was an el…
247	Full Panel: Students' gun march will test strength of movement	anonymous-source/all_shooting_images_newest/10322.jpg	[{'emotion': 'Anger', 'intensity': '4', 'reason': 'they are probably getting nothing done '}, {'emotion': 'Contentment', 'intensity': '1', 'reason': "I'm not sure what's going on here but there is nothing that sets off alarm bells in the photo. in the context of gun violence, I'm going to assume that they're talking about a recent bill because nothing is alarming me on their faces. "}, {'emotion'…
249	Guns allowed on campus leads prof to cancel office hours, declare I no longer feel safe : student	anonymous-source/all_shooting_images_newest/335.jpg	[{'emotion': 'Fear', 'intensity': '4', 'reason': 'why he is carrying a gun at what looks like a dinner'}, {'emotion': 'Fear', 'intensity': '4', 'reason': "there doesn't seem to be a need for the gun and there are children. I don't understand why he's reaching for it but based on the news, it makes me feel like someone is going to die. "}, {'emotion': 'Fear', 'intensity': '4', 'reason': 'seems as …
252	Obama calls on Americans 'to fight the rise of anti-Semitism' after synagogue shooting	anonymous-source/all_shooting_images_newest/100452.jpg	[{'emotion': 'Sadness', 'intensity': '4', 'reason': 'miss Obama '}, {'emotion': 'Sadness', 'intensity': '1', 'reason': "this makes me feel like something bad just happened and he's holding a sad press conference to talk about it and offer condolances. There is nothing in the image that hints that it could be positive news or anything light. "}, {'emotion': 'Fear', 'intensity': '2', 'reason': 'he …
253	The Capital Gazette shooting and the limits of an assault weapons ban	anonymous-source/all_shooting_images_newest/10151.jpg	[{'emotion': 'Anger', 'intensity': '4', 'reason': 'another weapon that could carry out a mass shooting'}, {'emotion': 'Anger', 'intensity': '2', 'reason': 'This looks like an assault rifle so it makes me feel like someone got their hands on one (when there was no need) and then committed a crime. '}, {'emotion': 'Fear', 'intensity': '4', 'reason': 'big guns are scary and unnecessary '}, {'emotion…
255	How We Mourned' memorializes Las Vegas mass shooting	anonymous-source/all_shooting_images_newest/90038.jpg	[{'emotion': 'Sadness', 'intensity': '5', 'reason': 'that those people lost their lives'}, {'emotion': 'Sadness', 'intensity': '3', 'reason': "I feel bad for the victims. I'm sad that they lost their lives in such a horrible way. "}, {'emotion': 'Sadness', 'intensity': '5', 'reason': 'so many people lost their lives for no reason'}, {'emotion': 'Sadness', 'intensity': '2', 'reason': 'Many people …
256	Alabama mall shooting: Police admit they killed innocent black man by mistake as true Thanksgiving gunman remains at large	anonymous-source/all_shooting_images_newest/110505.jpg	[{'emotion': 'Sadness', 'intensity': '4', 'reason': 'because another mass shooting probably occurred '}, {'emotion': 'Fear', 'intensity': '3', 'reason': 'there was a shooting near me that happened at a store like JCPenney, and it was scary. This reminds me of it. '}, {'emotion': 'Sadness', 'intensity': '2', 'reason': 'you can tell something bad happened'}, {'emotion': 'Sadness', 'intensity': '2',…
260	Lakers will honor victims of Thousand Oaks shooting at next home game	anonymous-source/all_shooting_images_newest/110373.jpg	[{'emotion': 'Sadness', 'intensity': '3', 'reason': 'The man is crying'}, {'emotion': 'Sadness', 'intensity': '5', 'reason': 'Sadness\r\n'}, {'emotion': 'Sadness', 'intensity': '4', 'reason': 'I feel bad for these people who have clearly suffered a loss'}, {'emotion': 'Sadness', 'intensity': '3', 'reason': "Gun violence is a huge issue in our society and it's sad to see so many people affected du…
262	Piers Morgan Turns On 'Coward' Trump, Tells Him To 'Grow A Pair' On Gun Control	anonymous-source/all_shooting_images_newest/100106.jpg	[{'emotion': 'Anger', 'intensity': '5', 'reason': 'Tired of Trump slwoing US social progress'}, {'emotion': 'Disgust', 'intensity': '1', 'reason': 'Disgust\r\n'}, {'emotion': 'Anger', 'intensity': '5', 'reason': 'I do not like the political figures'}, {'emotion': 'Disgust', 'intensity': '3', 'reason': "Don't have context about this "}, {'emotion': 'Anger', 'intensity': '1', 'reason': 'yelling wit…
263	Judge blocks release of 3D-printed gun plans one day after Jacksonville Madden shooting	anonymous-source/all_shooting_images_newest/162.jpg	[{'emotion': 'Fear', 'intensity': '5', 'reason': "It's a gun"}, {'emotion': 'Fear', 'intensity': '4', 'reason': 'Fear\r\n'}, {'emotion': 'Fear', 'intensity': '3', 'reason': 'I worry that this is some sort of method of concealing a weapon'}, {'emotion': 'Contentment', 'intensity': '3', 'reason': 'dont have enough context for this'}, {'emotion': 'Fear', 'intensity': '4', 'reason': 'I am afraid of a…
264	Medical professionals refuse to stay in their own lane on gun violence	anonymous-source/all_shooting_images_newest/110253.jpg	[{'emotion': 'Fear', 'intensity': '5', 'reason': 'Those guns are threatening'}, {'emotion': 'Anger', 'intensity': '4', 'reason': 'Anger\r\n'}, {'emotion': 'Anger', 'intensity': '3', 'reason': 'I do not think guns like this should be so readily available'}, {'emotion': 'Contentment', 'intensity': '3', 'reason': 'dont have enough context for this'}, {'emotion': 'Fear', 'intensity': '3', 'reason': "…
266	Jacksonville councilman on shooting: We've got a problem with guns and faith	anonymous-source/all_shooting_images_newest/412.jpg	[{'emotion': 'Fear', 'intensity': '1', 'reason': "not sure what's going on"}, {'emotion': 'Fear', 'intensity': '4', 'reason': 'Fear\r\n'}, {'emotion': 'Anger', 'intensity': '3', 'reason': 'I am upset to see a crime like this occur'}, {'emotion': 'Fear', 'intensity': '3', 'reason': 'it makes me realise that I can be a target to gun violence too '}, {'emotion': 'Sadness', 'intensity': '4', 'reason'…
269	Michigan man gets up to 10 years in prison for shooting at black teen asking for directions | TheHill	anonymous-source/all_shooting_images_newest/110094.jpg	[{'emotion': 'Fear', 'intensity': '3', 'reason': "Not sure what's going on"}, {'emotion': 'Contentment', 'intensity': '3', 'reason': 'Contentment\r\n'}, {'emotion': 'Fear', 'intensity': '3', 'reason': "I am worried about the safety of this man's neighbors"}, {'emotion': 'Contentment', 'intensity': '3', 'reason': 'dont have context '}, {'emotion': 'Fear', 'intensity': '3', 'reason': 'I am afraid t…
273	Breaking: Judge issues big decision on 3D printed guns hours before midnight deadline	anonymous-source/all_shooting_images_newest/171.jpg	[{'emotion': 'Fear', 'intensity': '5', 'reason': 'Guns are scary'}, {'emotion': 'Anger', 'intensity': '3', 'reason': 'Anger\r\n'}, {'emotion': 'Fear', 'intensity': '1', 'reason': "I am not exactly sure what I'm looking at and I worry about what is being done with the gun"}, {'emotion': 'Contentment', 'intensity': '3', 'reason': 'dont have context '}, {'emotion': 'Fear', 'intensity': '3', 'reason'…
274	Image Firearms Industry Appears Stuck in the Doldrums Interest in hunting products at Dick s Sporting Goods is sliding, background checks for firearms fell on Black Friday and pressure from Wall Street isn t letting up. By Tiffany Hsu	anonymous-source/all_shooting_images_newest/110267.jpg	[{'emotion': 'Fear', 'intensity': '5', 'reason': 'Why does someone have or need that many guns...'}, {'emotion': 'Anger', 'intensity': '3', 'reason': 'Anger\r\n'}, {'emotion': 'Anger', 'intensity': '4', 'reason': 'Guns should not be this readily available for purchase'}, {'emotion': 'Sadness', 'intensity': '3', 'reason': 'arms shouldnt be easily accessible for general public '}, {'emotion': 'Ange…
275	Parkland survivors keep memory of shooting alive	anonymous-source/all_shooting_images_newest/10004.jpg	[{'emotion': 'Sadness', 'intensity': '4', 'reason': 'Someone had died at that school. It is heartbreaking'}, {'emotion': 'Sadness', 'intensity': '4', 'reason': 'Sadness\r\n'}, {'emotion': 'Sadness', 'intensity': '3', 'reason': 'I feel bad for the victims and loved ones'}, {'emotion': 'Sadness', 'intensity': '4', 'reason': "it's sad to see people be affected due to this"}, {'emotion': 'Sadness', '…
276	Shooting at Jacksonville Videogame Event Puts Focus on Security	anonymous-source/all_shooting_images_newest/434.jpg	[{'emotion': 'Fear', 'intensity': '3', 'reason': 'A police officer is out and about on patrol'}, {'emotion': 'Fear', 'intensity': '3', 'reason': 'Fear\r\n'}, {'emotion': 'Fear', 'intensity': '2', 'reason': 'I am worried about what has happened at this scene'}, {'emotion': 'Contentment', 'intensity': '3', 'reason': 'dont have context'}, {'emotion': 'Sadness', 'intensity': '3', 'reason': 'police ta…
280	Giffords, Nevada Democrats meet 1 year after Vegas shooting	anonymous-source/all_shooting_images_newest/100174.jpg	[{'emotion': 'Sadness', 'intensity': '2', 'reason': "A lover's sad expression makes me vague and sad."}, {'emotion': 'Sadness', 'intensity': '3', 'reason': 'it seems like they are mourning '}, {'emotion': 'Sadness', 'intensity': '5', 'reason': 'It seems that the couple is mourning the victim of gun violence'}, {'emotion': 'Fear', 'intensity': '3', 'reason': 'thy are so sad'}, {'emotion': 'Sadness…
283	Pittsburgh shooting suspect said he wanted all Jews to die: police	anonymous-source/all_shooting_images_newest/100451.jpg	[{'emotion': 'Fear', 'intensity': '4', 'reason': 'The polices in the picture look very serious and it makes me scary because something bad and serious is happening.'}, {'emotion': 'Sadness', 'intensity': '3', 'reason': 'the police need to do better'}, {'emotion': 'Sadness', 'intensity': '5', 'reason': 'This scene indicates that there was a gun violence incident happened in this building'}, {'emot…
288	Florida Police Issued An Arrest Warrant For A White Man Who Pulled A Gun On Black College Students	anonymous-source/all_shooting_images_newest/90095.jpg	[{'emotion': 'Fear', 'intensity': '4', 'reason': 'The man in the photo looks very menacing, and it scares me.'}, {'emotion': 'Fear', 'intensity': '3', 'reason': 'it seems like a confrontation\r\n'}, {'emotion': 'Sadness', 'intensity': '1', 'reason': 'Who is he, how does he relate to gun violence?'}, {'emotion': 'Excitement', 'intensity': '3', 'reason': 'WORLDSTAR'}, {'emotion': 'Fear', 'intensity…
290	Looking back at the Las Vegas mass shooting Photos	anonymous-source/all_shooting_images_newest/100284.jpg	[{'emotion': 'Sadness', 'intensity': '4', 'reason': 'The empty eyes and dirty clothes of the woman in the photo make me predict how difficult it must have been for her. And the ambulance in the back makes the situation even more dramatic.'}, {'emotion': 'Sadness', 'intensity': '3', 'reason': 'the image shows desperation to me'}, {'emotion': 'Sadness', 'intensity': '5', 'reason': 'Apparently, this…
293	School Shootings in America So Common that Students Are Being Taught How to Stop Bleeding of Shot Classmates	anonymous-source/all_shooting_images_newest/110026.jpg	[{'emotion': 'Fear', 'intensity': '4', 'reason': 'This is what it looks like after the situation is over. Seeing that even FBI came, it must have been a serious situation, but I can feel their troubles.'}, {'emotion': 'Sadness', 'intensity': '3', 'reason': 'law enforcement has not been supportive of BIPOC people\r\n'}, {'emotion': 'Sadness', 'intensity': '5', 'reason': 'A gun violence incident ha…
300	Tense moments as community meets after funeral ambush: 'Your church has had many shootings'	anonymous-source/all_shooting_images_newest/100135.jpg	[{'emotion': 'Sadness', 'intensity': '2', 'reason': 'I feel sad because the expressions on their face look quite distressing and defeated. They may have been affected by gun violence and are processing that which makes me feel for them. '}, {'emotion': 'Sadness', 'intensity': '3', 'reason': "I'm not sure what is happening in the photo."}, {'emotion': 'Sadness', 'intensity': '3', 'reason': 'someon…
302	California governor signs gun control bills into law	anonymous-source/all_shooting_images_newest/90335.jpg	[{'emotion': 'Contentment', 'intensity': '2', 'reason': 'I feel pretty neutral, not sure if the man looks is giving a speech to stop gun violence. '}, {'emotion': 'Sadness', 'intensity': '3', 'reason': "I'm not sure who this is."}, {'emotion': 'Contentment', 'intensity': '3', 'reason': 'the possibility of justice being served'}, {'emotion': 'Contentment', 'intensity': '1', 'reason': "I'm not real…
304	Investigators test how well gun laws work online and find shocking results that undermine liberals	anonymous-source/all_shooting_images_newest/10689.jpg	[{'emotion': 'Fear', 'intensity': '4', 'reason': 'Gun violence has increased a lot in this country so this image does bring out a sense of fear. I was not raised around guns or violence so it makes me uncomfortable.'}, {'emotion': 'Sadness', 'intensity': '3', 'reason': 'Seeing photos of guns after hearing of gun violence makes me sad.'}, {'emotion': 'Anger', 'intensity': '3', 'reason': 'irrespons…
306	Thousand Oaks shooter is the textbook example of white privilege	anonymous-source/all_shooting_images_newest/110515.jpg	[{'emotion': 'Sadness', 'intensity': '4', 'reason': 'I feel sad because this looks like some sort of memorial which means someone died. No one wants to see kids hurting and upset so of course it brings an inner sadness. '}, {'emotion': 'Sadness', 'intensity': '3', 'reason': 'It looks like a memorial, which makes me sad.'}, {'emotion': 'Sadness', 'intensity': '3', 'reason': 'the possible loss of i…
308	White man who harassed black students with gun in viral video charged	anonymous-source/all_shooting_images_newest/90079.jpg	[{'emotion': 'Sadness', 'intensity': '2', 'reason': "This image stirs up emotions of confusion because I'm not sure if the Caucasian male is yelling at the other man in the image. "}, {'emotion': 'Sadness', 'intensity': '3', 'reason': "I'm not sure who this is."}, {'emotion': 'Fear', 'intensity': '3', 'reason': 'someone suspicious who carries with him an ominous vibe'}, {'emotion': 'Disgust', 'in…
310	Pittsburgh synagogue shooting suspect threatened Jewish groups, pushed migrant caravan conspiracies	anonymous-source/all_shooting_images_newest/100147.jpg	[{'emotion': 'Contentment', 'intensity': '1', 'reason': 'This image makes me feel contentment, he looks like an old man in the crowd so I feel neutral.'}, {'emotion': 'Sadness', 'intensity': '3', 'reason': "I'm not sure who this is in the photo."}, {'emotion': 'Sadness', 'intensity': '3', 'reason': 'the possible loss of innocent lives'}, {'emotion': 'Sadness', 'intensity': '1', 'reason': "I'm not…
313	Could high-tech tools have prevented Pittsburgh's shooting?	anonymous-source/all_shooting_images_newest/100441.jpg	[{'emotion': 'Sadness', 'intensity': '2', 'reason': 'Not sure if this man is here to give press briefing after a shooting or called the media to discuss gun violence but I get feeling of sadness when looking at his facial expressions and thinking about the context of press conferences with gun violence. '}, {'emotion': 'Sadness', 'intensity': '3', 'reason': "I'm not sure what this photo is depict…
314	Trump Gun Slump: Sales Plummet As Americans Don't Buy Gun Control Threats	anonymous-source/all_shooting_images_newest/10714.jpg	[{'emotion': 'Fear', 'intensity': '4', 'reason': 'Not used to being around guns so seeing so many makes me fearful if they get into the wrong hands or are used for sheer violence.'}, {'emotion': 'Sadness', 'intensity': '3', 'reason': 'Seeing photos of guns after hearing of gun violence makes me sad.'}, {'emotion': 'Anger', 'intensity': '3', 'reason': 'irresponsible people handling guns'}, {'emoti…
316	Trending: Twitter fills with calls for action after Fla. shooting	anonymous-source/all_shooting_images_newest/10134.jpg	[{'emotion': 'Sadness', 'intensity': '4', 'reason': 'I empathize with these kids and feel an immediate sense of sadness. No one should feel unsafe at school and have to walk out with their hands up their heads because of gun violence. '}, {'emotion': 'Sadness', 'intensity': '4', 'reason': 'So very sad and angry to see children going through such trauma.'}, {'emotion': 'Sadness', 'intensity': '3',…
318	Arrest warrant issued for white man who pulled gun on black students in viral video	anonymous-source/all_shooting_images_newest/90086.jpg	[{'emotion': 'Fear', 'intensity': '2', 'reason': " This time I noticed the caucasians man's hat which brought a sense of fear out of me for the other man in the elevator. Anyone who needs to publicize they like guns makes me fearful."}, {'emotion': 'Sadness', 'intensity': '3', 'reason': "I'm not sure who this is in the photo."}, {'emotion': 'Fear', 'intensity': '3', 'reason': 'someone who looks m…
319	This is a very dangerous person,' says lawyer who represented harassment victim of Maryland gunman	anonymous-source/all_shooting_images_newest/10561.jpg	[{'emotion': 'Disgust', 'intensity': '4', 'reason': 'I feel like he is the criminal.'}, {'emotion': 'Fear', 'intensity': '4', 'reason': 'His eyes let me feel very uncomfortable.'}, {'emotion': 'Anger', 'intensity': '3', 'reason': 'the person seems to be a criminal.'}, {'emotion': 'Fear', 'intensity': '4', 'reason': 'looks like shooter'}, {'emotion': 'Fear', 'intensity': '3', 'reason': 'the man se…
320	Teen hailed as hero for reporting classmate with gun and preventing possible school shooting	anonymous-source/all_shooting_images_newest/110409.jpg	[{'emotion': 'Fear', 'intensity': '2', 'reason': 'It is dangerous.'}, {'emotion': 'Fear', 'intensity': '5', 'reason': "When seeing a gun in this picture, I feel uncomfortable. And I'm worried whether the person will do something to hurt others."}, {'emotion': 'Disgust', 'intensity': '4', 'reason': "I don't think that is the proper way to carry a gun and it seems like the gun is at the ready to hu…
325	Republican who called Florida shooting survivor a 'skinhead lesbian' quits Maine race	anonymous-source/all_shooting_images_newest/10514.jpg	[{'emotion': 'Sadness', 'intensity': '3', 'reason': 'I can sympathize with the people about the aftermath due to the gun violence.'}, {'emotion': 'Sadness', 'intensity': '3', 'reason': 'The woman looks sad. Maybe she loses her friends or family because of gun violence. Everyone is hurt by gun violence is sympathetic.'}, {'emotion': 'Sadness', 'intensity': '2', 'reason': 'I recognize the person an…
326	The deadly peril of not enforcing gun laws	anonymous-source/all_shooting_images_newest/100399.jpg	[{'emotion': 'Sadness', 'intensity': '3', 'reason': 'I can sympathize with the people about the aftermath due to the gun violence.'}, {'emotion': 'Sadness', 'intensity': '4', 'reason': 'I feel very sad when seeing someone loses his or her life because of gun violence.'}, {'emotion': 'Sadness', 'intensity': '3', 'reason': 'I assume the person in the casket died from gun violence.'}, {'emotion': 'S…
327	Alabama elementary school student brings gun to school, shoots himself in hand: police	anonymous-source/all_shooting_images_newest/90146.jpg	[{'emotion': 'Fear', 'intensity': '3', 'reason': 'people feel uncertain about the gun situation.'}, {'emotion': 'Fear', 'intensity': '1', 'reason': "I don't know what happened on the school in the picture. But it looks so quiet, so I'm worried about children here."}, {'emotion': 'Fear', 'intensity': '3', 'reason': 'the images evoke feelings of abandonment and desertion, like the school is unprote…
328	Don Lemon on Fla. shooting: This is a sickness that has infected this country	anonymous-source/all_shooting_images_newest/10832.jpg	[{'emotion': 'Sadness', 'intensity': '3', 'reason': 'I can sympathize with the people about the aftermath due to the gun violence.'}, {'emotion': 'Sadness', 'intensity': '4', 'reason': 'I feel very sad when seeing someone loses his or her life because of gun violence.'}, {'emotion': 'Sadness', 'intensity': '2', 'reason': 'these news stories feel repetitive and it feels like no one is doing anythi…
331	Trump visits Florida hospital after school shooting	anonymous-source/all_shooting_images_newest/10343.jpg	[{'emotion': 'Anger', 'intensity': '4', 'reason': "I don't believe politicians about gun control."}, {'emotion': 'Disgust', 'intensity': '2', 'reason': "Trump looks just like a politician, he totally doesn't care about gun violence in this country."}, {'emotion': 'Sadness', 'intensity': '1', 'reason': "I feel like Trump didn't do enough to stop gun violence."}, {'emotion': 'Anger', 'intensity': '…
334	Supreme Court rebuffs challenge to California gun restrictions	anonymous-source/all_shooting_images_newest/110069.jpg	[{'emotion': 'Fear', 'intensity': '3', 'reason': 'people feel uncertain about the gun situation.'}, {'emotion': 'Fear', 'intensity': '5', 'reason': 'There are too many guns in the picture. I just can relate them to some bad things.'}, {'emotion': 'Fear', 'intensity': '2', 'reason': "that's a lot of guns."}, {'emotion': 'Anger', 'intensity': '4', 'reason': 'guns hurt people '}, {'emotion': 'Fear',…
336	Police: Pittsburgh synagogue gunman said 'I just want to kill Jews'	anonymous-source/all_shooting_images_newest/100401.jpg	[{'emotion': 'Sadness', 'intensity': '4', 'reason': 'I can sympathize with the people about the aftermath due to the gun violence.'}, {'emotion': 'Sadness', 'intensity': '5', 'reason': 'I feel very sad when seeing someone loses his or her life because of gun violence.'}, {'emotion': 'Sadness', 'intensity': '4', 'reason': 'vigils are sad and people mourning is sad.'}, {'emotion': 'Sadness', 'inten…
337	Parkland survivor details her experience during shooting at Kavanaugh hearing	anonymous-source/all_shooting_images_newest/90149.jpg	[{'emotion': 'Fear', 'intensity': '3', 'reason': 'people feel uncertain about the gun situation.'}, {'emotion': 'Sadness', 'intensity': '3', 'reason': 'I feel very sad when seeing gun violence happened in a school.'}, {'emotion': 'Sadness', 'intensity': '2', 'reason': 'that is a school that had gun violence.'}, {'emotion': 'Sadness', 'intensity': '4', 'reason': 'the site of another mass shooting …
339	Exclusive: Group chat messages show school shooter obsessed with race, violence and guns	anonymous-source/all_shooting_images_newest/10156.jpg	[{'emotion': 'Fear', 'intensity': '4', 'reason': 'he is a stereotypical school shooter archetype in my head. '}, {'emotion': 'Disgust', 'intensity': '4', 'reason': "I don't feel comfortable with people wearing bulletproof vests or other armed equipment in normal life. "}, {'emotion': 'Disgust', 'intensity': '5', 'reason': 'he seems to be one of the killers '}, {'emotion': 'Disgust', 'intensity': …
340	Does President Trump really not know why shootings in our country occur?	anonymous-source/all_shooting_images_newest/90243.jpg	[{'emotion': 'Anger', 'intensity': '2', 'reason': 'guns are inherently violent. '}, {'emotion': 'Anger', 'intensity': '5', 'reason': 'If criminal suspects are the person in this kind of picture, it will make me feel that they are ready to start conflicts and hurt others.'}, {'emotion': 'Fear', 'intensity': '5', 'reason': 'something bad might happen in the future and he seems like the murderer'}, …
344	California already had the strictest gun control laws in the nation. They just passed a bunch more	anonymous-source/all_shooting_images_newest/100027.jpg	[{'emotion': 'Fear', 'intensity': '2', 'reason': 'the gun industry is so under-regulated. '}, {'emotion': 'Contentment', 'intensity': '3', 'reason': 'These guns are well kept, and the manufacturer and serial number can be queried.'}, {'emotion': 'Fear', 'intensity': '3', 'reason': 'why are people still selling guns '}, {'emotion': 'Fear', 'intensity': '4', 'reason': 'guns scare me'}, {'emotion': …
346	Synagogue shooting suspect appears in court as Pittsburgh prepares for Trump's visit	anonymous-source/all_shooting_images_newest/100320.jpg	[{'emotion': 'Sadness', 'intensity': '4', 'reason': 'so many people have died and these people are grieving. '}, {'emotion': 'Sadness', 'intensity': '5', 'reason': 'They are praying for the victims.'}, {'emotion': 'Sadness', 'intensity': '4', 'reason': 'someone may died because of gun violence '}, {'emotion': 'Sadness', 'intensity': '5', 'reason': "for people that lost their loved ones because of…
349	Lawyers call US gun charges for Mexican man 'vindictive'	anonymous-source/all_shooting_images_newest/10207.jpg	[{'emotion': 'Anger', 'intensity': '2', 'reason': 'it feels like only POC men are held accountable for gun violence'}, {'emotion': 'Anger', 'intensity': '5', 'reason': 'This person is wearing a prison uniform, he must be a suspect'}, {'emotion': 'Contentment', 'intensity': '5', 'reason': 'they are putting the murderer to jail'}, {'emotion': 'Anger', 'intensity': '4', 'reason': 'from this picture …
353	Nashville mayor demands stricter gun control after Waffle House shooting	anonymous-source/all_shooting_images_newest/10122.jpg	[{'emotion': 'Sadness', 'intensity': '2', 'reason': 'its clear that something violent happened here. '}, {'emotion': 'Sadness', 'intensity': '5', 'reason': 'This is the crime scene'}, {'emotion': 'Fear', 'intensity': '5', 'reason': 'seems like someone got shot here'}, {'emotion': 'Fear', 'intensity': '5', 'reason': 'it looks like the scene of a mass shooting so it makes me feel sad and angry beca…
356	Doctors release new recommendations to reduce gun violence	anonymous-source/all_shooting_images_newest/100330.jpg	[{'emotion': 'Sadness', 'intensity': '4', 'reason': 'they are mourning. '}, {'emotion': 'Sadness', 'intensity': '3', 'reason': 'People are praying'}, {'emotion': 'Sadness', 'intensity': '5', 'reason': 'someone died '}, {'emotion': 'Sadness', 'intensity': '4', 'reason': "for people that lost their loved ones because of the guns' use"}, {'emotion': 'Sadness', 'intensity': '3', 'reason': 'This pictu…
360	Trump's 'Angel Families' weaponize their grief to demonize immigrants	anonymous-source/all_shooting_images_newest/10009.jpg	[{'emotion': 'Sadness', 'intensity': '3', 'reason': "There's certainly a girl killed by gun violence and it is sad for me."}, {'emotion': 'Sadness', 'intensity': '3', 'reason': 'Although they are honoring victims of gun violence, policies have not been changed and that is very disappointing, scary and sad '}, {'emotion': 'Sadness', 'intensity': '3', 'reason': 'losing family'}, {'emotion': 'Anger'…
362	Pelosi meets with Parkland students and parents, says gun control would be atop Dems agenda	anonymous-source/all_shooting_images_newest/100214.jpg	[{'emotion': 'Awe', 'intensity': '3', 'reason': 'It looks like a serious and official press event.'}, {'emotion': 'Fear', 'intensity': '3', 'reason': 'I am curious to hear what she is saying about gun violence. '}, {'emotion': 'Contentment', 'intensity': '3', 'reason': 'speech'}, {'emotion': 'Contentment', 'intensity': '3', 'reason': 'figure in power with beliefs that I agree in give me faith in …
363	Brady Center launches new campaign to help keep kids safe from guns at home Video	anonymous-source/all_shooting_images_newest/241.jpg	[{'emotion': 'Sadness', 'intensity': '4', 'reason': 'I feel sad since the image reminds me how gun violence could affect children and teenagers.'}, {'emotion': 'Fear', 'intensity': '4', 'reason': 'The exposure kids have to guns in the U.S. is terrifying. Guns are easy to find '}, {'emotion': 'Fear', 'intensity': '3', 'reason': 'danger'}, {'emotion': 'Anger', 'intensity': '5', 'reason': 'no weapon…
365	Guns found at 2 schools, threats reported at 3 schools near Santa Fe High School on 1st day back after mass shooting	anonymous-source/all_shooting_images_newest/10157.jpg	[{'emotion': 'Anger', 'intensity': '4', 'reason': 'It shows how gun violence hurt children and students, and people who shoot in school area makes me even more angry.'}, {'emotion': 'Anger', 'intensity': '4', 'reason': "above is a visual representation of the horrors of lack of gun control. It makes me angry that there are so many photos like these and the government still won't fix policies to h…
366	My Father, a Judge, Said a Gun Control Case Was One of His Hardest. Now I See Why.	anonymous-source/all_shooting_images_newest/90325.jpg	[{'emotion': 'Sadness', 'intensity': '4', 'reason': 'Gun violence is related to death, and the image illustrates this fact.'}, {'emotion': 'Sadness', 'intensity': '4', 'reason': 'above is a visual representation of the horrors of lack of gun control. It demonstrates great suffering '}, {'emotion': 'Sadness', 'intensity': '3', 'reason': 'The victim'}, {'emotion': 'Fear', 'intensity': '5', 'reason'…
367	Marchers Should Demand Second Amendment Repeal, Says Former Supreme Court Justice Stevens	anonymous-source/all_shooting_images_newest/10041.jpg	[{'emotion': 'Awe', 'intensity': '3', 'reason': 'This looks like an official press event, and the person looks solemn.'}, {'emotion': 'Contentment', 'intensity': '3', 'reason': 'I wonder what he is contemplating. '}, {'emotion': 'Awe', 'intensity': '3', 'reason': 'respect'}, {'emotion': 'Contentment', 'intensity': '1', 'reason': 'I don’t have any particularly strong feelings about this image'}, {…
369	November 13 12:27 PM Man gets prison for shooting at black teen asking for directions	anonymous-source/all_shooting_images_newest/110427.jpg	[{'emotion': 'Fear', 'intensity': '3', 'reason': 'I cannot tell exactly why but this person looks like related to gun violence.'}, {'emotion': 'Fear', 'intensity': '3', 'reason': 'it looks like that is someone who was involved/prosecuted for a shooting'}, {'emotion': 'Fear', 'intensity': '3', 'reason': 'looks scary'}, {'emotion': 'Anger', 'intensity': '3', 'reason': 'I dislike anyone who abuses g…
375	Teens raised on lockdown drills feel the weight of the Florida shooting	anonymous-source/all_shooting_images_newest/10165.jpg	[{'emotion': 'Anger', 'intensity': '4', 'reason': "The content in the image shows people's worry and anger toward gun violence, and the words they use made me feel their desperate. "}, {'emotion': 'Sadness', 'intensity': '5', 'reason': 'this quote holds so much emotion. The first two paragraphs are sad, they demonstrate fear, sadness, and loss. But the last is inspiring, the line "to live is to f…
376	Maryland drugstore shooter was diagnosed with mental illness but legally owned gun, sheriff says	anonymous-source/all_shooting_images_newest/90330.jpg	[{'emotion': 'Sadness', 'intensity': '3', 'reason': "Seems there's a gunshot happened in this area, and I usually feel worried and fear when seeing acertain scenes."}, {'emotion': 'Sadness', 'intensity': '4', 'reason': 'it can be assumed through the context of gun violence that there was just a mass shooting which is devastating '}, {'emotion': 'Fear', 'intensity': '3', 'reason': 'accident place'…
377	Donald Trump condemned for using 'I hear you' cue card in meeting with Florida shooting survivors	anonymous-source/all_shooting_images_newest/10060.jpg	[{'emotion': 'Awe', 'intensity': '4', 'reason': 'This note made me feel I can tell my worries to them, especially the last sentence.'}, {'emotion': 'Anger', 'intensity': '4', 'reason': 'The final line "I hear you" seems contradictory. Given that this is in the context of gun violence, if people were heard, there would be more gun control'}, {'emotion': 'Fear', 'intensity': '3', 'reason': 'questio…
384	Gun owners support a wide range of gun control measures, Johns Hopkins study finds	anonymous-source/all_shooting_images_newest/10434.jpg	[{'emotion': 'Fear', 'intensity': '4', 'reason': 'Unlike other small guns, the guns in the picture look really dangerous, which makes me scared. '}, {'emotion': 'Fear', 'intensity': '5', 'reason': 'I feel fear at people that use guns to harm people'}, {'emotion': 'Fear', 'intensity': '5', 'reason': 'Too much guns '}, {'emotion': 'Disgust', 'intensity': '5', 'reason': "I can't wrap my head, and un…
386	Official: Shooter debated sanity online during bar massacre	anonymous-source/all_shooting_images_newest/110274.jpg	[{'emotion': 'Sadness', 'intensity': '4', 'reason': "The candles and the woman's sad eyes make me become emotional and feel sadness."}, {'emotion': 'Sadness', 'intensity': '5', 'reason': 'I feel sad for people that are harmed by guns'}, {'emotion': 'Sadness', 'intensity': '4', 'reason': 'people are dying because of gun violence '}, {'emotion': 'Sadness', 'intensity': '5', 'reason': "It's so unfor…
389	Man, 45, threatened to shoot 11-year-old after losing Xbox game: police	anonymous-source/all_shooting_images_newest/90296.jpg	[{'emotion': 'Fear', 'intensity': '4', 'reason': "I don't know who he is and whether he is a perpetrator or victim of the gun incident, his facial expression makes me fearful. "}, {'emotion': 'Sadness', 'intensity': '3', 'reason': 'I feel anger at people that use guns to hurt people'}, {'emotion': 'Fear', 'intensity': '5', 'reason': "The man didn't look like normal and he seemed like in prison "}…
393	Hate crime charges filed in Pittsburgh synagogue shooting that left 11 dead	anonymous-source/all_shooting_images_newest/100245.jpg	[{'emotion': 'Sadness', 'intensity': '2', 'reason': 'The soldier or police in the picture look very exhausted, which makes me sad. '}, {'emotion': 'Sadness', 'intensity': '4', 'reason': 'I feel sad for people that are harmed by guns'}, {'emotion': 'Fear', 'intensity': '5', 'reason': 'This guy is armed'}, {'emotion': 'Fear', 'intensity': '4', 'reason': "Even if this is someone who was sent to prot…
395	Florida survivors of school gun massacre to hit the road for arms control	anonymous-source/all_shooting_images_newest/10769.jpg	[{'emotion': 'Excitement', 'intensity': '4', 'reason': "The young man's confident pose and facial expression make me also excited, and 'March For Our Lives' behind him makes me amused since it looks hopeful. "}, {'emotion': 'Excitement', 'intensity': '5', 'reason': 'I feel excitement that people want to end gun violence'}, {'emotion': 'Excitement', 'intensity': '4', 'reason': 'people making speec…
396	This is my highway': Doctors challenge NRA after Chicago hospital shooting	anonymous-source/all_shooting_images_newest/110306.jpg	[{'emotion': 'Sadness', 'intensity': '4', 'reason': 'The dolls and heart shape make me sad. It makes me even sadder because it seems to be honoring young children.'}, {'emotion': 'Sadness', 'intensity': '5', 'reason': 'I feel sad for people that are harmed by guns'}, {'emotion': 'Sadness', 'intensity': '4', 'reason': 'Children are dying because of gun '}, {'emotion': 'Sadness', 'intensity': '4', …
399	Courts in three states bar release of 3D-printable gun blueprints	anonymous-source/all_shooting_images_newest/212.jpg	[{'emotion': 'Fear', 'intensity': '3', 'reason': 'Fear because of the gun'}, {'emotion': 'Contentment', 'intensity': '3', 'reason': "It's a gun with a portable case. "}, {'emotion': 'Fear', 'intensity': '4', 'reason': "The gun held in the man's hand looks like a toy, but it is a real lethal weapon. It makes me feel fear."}, {'emotion': 'Awe', 'intensity': '3', 'reason': "I mean it's still easier …
415	Kill Me, Parkland Shooting Suspect Said After Rampage	anonymous-source/all_shooting_images_newest/121.jpg	[{'emotion': 'Sadness', 'intensity': '3', 'reason': 'Sad for the deaths of young people'}, {'emotion': 'Sadness', 'intensity': '3', 'reason': 'This place must be a crime that happened, and people are giving their honor to memory the victim. '}, {'emotion': 'Sadness', 'intensity': '5', 'reason': 'The picture indicates that this high school might just experience a terrible gun violence incident.'},…
416	California Shooter Had Domestic-Disturbance History	anonymous-source/all_shooting_images_newest/110334.jpg	[{'emotion': 'Fear', 'intensity': '3', 'reason': 'Fear because the crime scene tape'}, {'emotion': 'Sadness', 'intensity': '3', 'reason': 'Crime scene'}, {'emotion': 'Sadness', 'intensity': '5', 'reason': 'The picture indicates that this house might just experience a terrible gun violence incident.'}, {'emotion': 'Fear', 'intensity': '2', 'reason': "I don't know what's happening, but I can infer …
417	Shields and Brooks on White House chaos, gun control polarization	anonymous-source/all_shooting_images_newest/10299.jpg	[{'emotion': 'Contentment', 'intensity': '3', 'reason': 'I like they re expressing political beliefs'}, {'emotion': 'Sadness', 'intensity': '3', 'reason': 'Their facial expression and the topic must sad.'}, {'emotion': 'Contentment', 'intensity': '4', 'reason': 'The TV host looks sad, if it is because of the gun violence, it makes me feel contentment that the host is expressing huge sad.'}, {'emo…
425	Pittsburgh leaders, residents split over President Trump s trip to synagogue shooting site	anonymous-source/all_shooting_images_newest/100088.jpg	[{'emotion': 'Sadness', 'intensity': '5', 'reason': 'people alive still have to live with the fact they their families were victims'}, {'emotion': 'Sadness', 'intensity': '5', 'reason': 'It is sad to see someone crying'}, {'emotion': 'Sadness', 'intensity': '5', 'reason': 'that picture is heartbreaking '}, {'emotion': 'Sadness', 'intensity': '3', 'reason': "people shouldn't have to mourn their lo…
430	Trump praises gun rights, bashes Mueller probe in speech to NRA	anonymous-source/all_shooting_images_newest/10203.jpg	[{'emotion': 'Anger', 'intensity': '4', 'reason': 'trump'}, {'emotion': 'Disgust', 'intensity': '5', 'reason': 'He is a disgusting person'}, {'emotion': 'Anger', 'intensity': '4', 'reason': 'hes a jackass'}, {'emotion': 'Anger', 'intensity': '3', 'reason': 'Trump did little to address the problem of gun violence in this country'}, {'emotion': 'Awe', 'intensity': '3', 'reason': 'I do not like him.…
435	Pittsburgh synagogue-shooting suspect wheeled into courtroom; Trump to visit city Tuesday	anonymous-source/all_shooting_images_newest/100102.jpg	[{'emotion': 'Sadness', 'intensity': '3', 'reason': 'people died'}, {'emotion': 'Sadness', 'intensity': '5', 'reason': 'So many people lost their lives for no reason'}, {'emotion': 'Sadness', 'intensity': '4', 'reason': 'because those are people that died in a shooting '}, {'emotion': 'Sadness', 'intensity': '3', 'reason': 'of the death that came in a synagogue shooting'}, {'emotion': 'Sadness', …
436	22 West Aurora students participate in third national walkout since Parkland shooting	anonymous-source/all_shooting_images_newest/10031.jpg	[{'emotion': 'Fear', 'intensity': '3', 'reason': "i'm scared that something bad would happen to a group of students just walking to class"}, {'emotion': 'Fear', 'intensity': '5', 'reason': 'These kids could be the next victim'}, {'emotion': 'Fear', 'intensity': '4', 'reason': 'that shootings happen at schools'}, {'emotion': 'Fear', 'intensity': '3', 'reason': 'it looks a little like kids being ev…
439	Parkland School Shooting Suspect Nikolas Cruz Spotted Giggling, Laughing While in Jail, Observation Report Says	anonymous-source/all_shooting_images_newest/10255.jpg	[{'emotion': 'Fear', 'intensity': '3', 'reason': "I don't know the context of this picture."}, {'emotion': 'Fear', 'intensity': '3', 'reason': 'minors could inflict gun violence'}, {'emotion': 'Fear', 'intensity': '5', 'reason': 'he looks psychotic'}, {'emotion': 'Disgust', 'intensity': '5', 'reason': "I can't believe people like this exist"}, {'emotion': 'Disgust', 'intensity': '3', 'reason': 'a…
444	Authorities seize 111 illegally owned firearms in L.A. County sweep	anonymous-source/all_shooting_images_newest/100078.jpg	[{'emotion': 'Fear', 'intensity': '3', 'reason': "That's a lot of guns."}, {'emotion': 'Fear', 'intensity': '3', 'reason': 'deadly weapons can be accessed by people'}, {'emotion': 'Fear', 'intensity': '4', 'reason': "there are so many guns - I don't know how each of those guns will be used"}, {'emotion': 'Sadness', 'intensity': '2', 'reason': "That's a lot of potential dead people"}, {'emotion': …
445	A month before deadly school shooting, Texas students protested gun violence	anonymous-source/all_shooting_images_newest/10379.jpg	[{'emotion': 'Contentment', 'intensity': '3', 'reason': 'These people look hopeful.'}, {'emotion': 'Contentment', 'intensity': '3', 'reason': 'people are taking action to create change'}, {'emotion': 'Awe', 'intensity': '2', 'reason': "young adults are taking a stand and making a statement - they're having a voice"}, {'emotion': 'Awe', 'intensity': '4', 'reason': 'These kids are so strong, but no…
446	8 men, 3 women killed in Pittsburgh synagogue shooting mourned	anonymous-source/all_shooting_images_newest/100333.jpg	[{'emotion': 'Sadness', 'intensity': '3', 'reason': 'These people look sad.'}, {'emotion': 'Sadness', 'intensity': '3', 'reason': 'people are facing consequences of gun violence'}, {'emotion': 'Sadness', 'intensity': '4', 'reason': 'they are celebrating and honoring the lives of the victims'}, {'emotion': 'Sadness', 'intensity': '4', 'reason': 'Vigils always hit in the feels, so many people lost …
453	We in Congress should protect students from gun violence as well as we protect ourselves	anonymous-source/all_shooting_images_newest/10310.jpg	[{'emotion': 'Fear', 'intensity': '3', 'reason': 'Looks like something bad happened.'}, {'emotion': 'Sadness', 'intensity': '3', 'reason': 'law intervenes post violence and not to prevent it'}, {'emotion': 'Excitement', 'intensity': '3', 'reason': "I'm curious about what happened"}, {'emotion': 'Sadness', 'intensity': '5', 'reason': 'School shootings happen way too much here'}, {'emotion': 'Fear'…
456	Gun Violence and Pipe Bombs Jolt Voters as Election Season Ends. Again? One Asks.	anonymous-source/all_shooting_images_newest/100334.jpg	[{'emotion': 'Sadness', 'intensity': '3', 'reason': 'These people look sad.'}, {'emotion': 'Sadness', 'intensity': '3', 'reason': 'no one deserves to lose their life to gun'}, {'emotion': 'Sadness', 'intensity': '5', 'reason': 'they are honoring the lives of the victims'}, {'emotion': 'Sadness', 'intensity': '4', 'reason': 'Vigils are sad, and this is a good photograph'}, {'emotion': 'Sadness', '…
459	Federal judge blocks release of blueprints for 3-D-printed guns	anonymous-source/all_shooting_images_newest/273.jpg	[{'emotion': 'Fear', 'intensity': '4', 'reason': 'fear but not too much fear, the look on his face is kind of funny though'}, {'emotion': 'Fear', 'intensity': '3', 'reason': "I don't understand why they are making guns more accessible?"}, {'emotion': 'Fear', 'intensity': '4', 'reason': "I don't know who he is aiming at"}, {'emotion': 'Sadness', 'intensity': '3', 'reason': 'If that is a 3D printed…
463	Texas judge to roll out new plan aimed at getting more guns away from domestic violence offenders	anonymous-source/all_shooting_images_newest/488.jpg	[{'emotion': 'Fear', 'intensity': '2', 'reason': "guns don't usually bother me too much but they are very strange to stare at"}, {'emotion': 'Fear', 'intensity': '3', 'reason': "guns are somewhat scary but it's not a bit automatic rifle"}, {'emotion': 'Contentment', 'intensity': '1', 'reason': "it's just a gun - it isn't being used for anything - the fact that it's in a case makes it seem like it…
465	Florida school shooter heard voices telling him to kill	anonymous-source/all_shooting_images_newest/204.jpg	[{'emotion': 'Sadness', 'intensity': '4', 'reason': "I feel sad because she looks like she's mourning someone from gun violence"}, {'emotion': 'Sadness', 'intensity': '4', 'reason': "people shouldn't have to be mourning the loss of others like this"}, {'emotion': 'Sadness', 'intensity': '4', 'reason': 'she looks like she lost her loved one'}, {'emotion': 'Sadness', 'intensity': '3', 'reason': 'Be…
466	Scott Beierle Tallahassee shooting: why online hate is so dangerous - Vox	anonymous-source/all_shooting_images_newest/110346.jpg	[{'emotion': 'Sadness', 'intensity': '3', 'reason': 'have a feeling someone got hurt'}, {'emotion': 'Sadness', 'intensity': '2', 'reason': "EMTs mean not good news and gun wounds aren't particularly easy to mend"}, {'emotion': 'Excitement', 'intensity': '4', 'reason': 'I want to know what happened'}, {'emotion': 'Sadness', 'intensity': '3', 'reason': 'It looks like EMTs were there because someone…
469	Why man says he's fighting to be allowed to post blueprints for 3-D printed guns Video	anonymous-source/all_shooting_images_newest/292.jpg	[{'emotion': 'Fear', 'intensity': '2', 'reason': 'not sure who this person is but they look guilty'}, {'emotion': 'Disgust', 'intensity': '1', 'reason': 'he looks like he would defend gun violence'}, {'emotion': 'Fear', 'intensity': '4', 'reason': 'he looks angry and is about to attack someone'}, {'emotion': 'Sadness', 'intensity': '3', 'reason': "I'm not sure who that is."}, {'emotion': 'Fear', …
473	Planned shift on gun exports kicks up storm	anonymous-source/all_shooting_images_newest/10131.jpg	[{'emotion': 'Fear', 'intensity': '4', 'reason': "it's a very frightening piece of equipment "}, {'emotion': 'Fear', 'intensity': '3', 'reason': 'lives are lost so quickly to assault rifles '}, {'emotion': 'Fear', 'intensity': '5', 'reason': 'this seems like a gun actually being used in a situation where people are getting hurt'}, {'emotion': 'Sadness', 'intensity': '3', 'reason': 'Seeing guns ma…
474	Pennsylvania High School Punishes More Than 200 Students for Participating in National Walkout Against Gun Violence	anonymous-source/all_shooting_images_newest/10078.jpg	[{'emotion': 'Awe', 'intensity': '4', 'reason': 'makes me feel happy to see people honor victims of gun violence'}, {'emotion': 'Sadness', 'intensity': '3', 'reason': "I did the same thing in high school and it's sad that we live in these times"}, {'emotion': 'Awe', 'intensity': '5', 'reason': 'young people are making their voices heard'}, {'emotion': 'Awe', 'intensity': '3', 'reason': "I'm inspi…
475	Shooting suspect was able to buy guns despite mental illness	anonymous-source/all_shooting_images_newest/322.jpg	[{'emotion': 'Sadness', 'intensity': '4', 'reason': 'I feel sad that this country has so many school shootings and memorials'}, {'emotion': 'Sadness', 'intensity': '3', 'reason': 'peoples lives are reduced to just flowers on the side of a street for a memorial '}, {'emotion': 'Sadness', 'intensity': '4', 'reason': 'the flowers and candle represent that someone died'}, {'emotion': 'Sadness', 'inte…
476	Experts share ways you can keep yourself safe in a mass shooting	anonymous-source/all_shooting_images_newest/110359.jpg	[{'emotion': 'Fear', 'intensity': '4', 'reason': 'I would be so scared if this were to happen in my school'}, {'emotion': 'Sadness', 'intensity': '3', 'reason': "people shouldn't have to scramble to make sure their children are alive at school"}, {'emotion': 'Excitement', 'intensity': '4', 'reason': 'I want to know what happened'}, {'emotion': 'Sadness', 'intensity': '3', 'reason': "I'm not sure …
478	Doctors start movement in response to NRA, calling for more gun research	anonymous-source/all_shooting_images_newest/110107.jpg	[{'emotion': 'Fear', 'intensity': '5', 'reason': "I'd be so scared as as doctor seeing all victims of shootings, and I'm sad for what they have to go through"}, {'emotion': 'Sadness', 'intensity': '3', 'reason': "it's heavy on all levels to deal with. police. medical. social"}, {'emotion': 'Fear', 'intensity': '5', 'reason': 'the spots look like bloodstains'}, {'emotion': 'Sadness', 'intensity': …
480	Unlikely pair could usher gun rights case to U.S. Supreme Court	anonymous-source/all_shooting_images_newest/238.jpg	[{'emotion': 'Sadness', 'intensity': '3', 'reason': 'the lady in the picture may die, and this man may be her father or brother. '}, {'emotion': 'Sadness', 'intensity': '4', 'reason': 'he is mourning the loss of his daughter and the sadness is in his eyes'}, {'emotion': 'Sadness', 'intensity': '3', 'reason': 'I feel sad because I understand that death caused by gun violence is extremely sudden, m…
486	Thousands Attended The First Funerals For The Victims Of The Pittsburgh Synagogue Shooting	anonymous-source/all_shooting_images_newest/100417.jpg	[{'emotion': 'Sadness', 'intensity': '3', 'reason': 'those girls are crying, and they are so sad. '}, {'emotion': 'Sadness', 'intensity': '4', 'reason': 'I hate seeing people cry especially over something so tragic'}, {'emotion': 'Sadness', 'intensity': '3', 'reason': 'Its sad to see humans grieve over other humans who have died from human-made machinery.'}, {'emotion': 'Sadness', 'intensity': '3…
487	School shootings: How parents can cope with their own fears and anxieties	anonymous-source/all_shooting_images_newest/90267.jpg	[{'emotion': 'Sadness', 'intensity': '3', 'reason': 'This kid seems like not happy when he go to the school '}, {'emotion': 'Sadness', 'intensity': '4', 'reason': 'it hurts to think children are scared to go to school'}, {'emotion': 'Sadness', 'intensity': '3', 'reason': 'Whenever I see a politician speak about a recently tragic event, it is really difficult to take their words seriously. '}, {'e…
496	Las Vegas marks 1-year shooting anniversary Video	anonymous-source/all_shooting_images_newest/100418.jpg	[{'emotion': 'Sadness', 'intensity': '3', 'reason': 'This are the grave of the victims'}, {'emotion': 'Sadness', 'intensity': '5', 'reason': 'there are too many lives lost to gun violence'}, {'emotion': 'Sadness', 'intensity': '3', 'reason': 'With the knowledge of how corrupt U.S. gun violence laws are, its difficult to see people still honoring the country knowing how flawed it is. '}, {'emotion…
497	Teaching in the Age of School Shootings	anonymous-source/all_shooting_images_newest/90342.jpg	[{'emotion': 'Sadness', 'intensity': '3', 'reason': "It's an empty classroom. "}, {'emotion': 'Sadness', 'intensity': '4', 'reason': 'I cant imagine returning to school after such an incident'}, {'emotion': 'Anger', 'intensity': '3', 'reason': 'It should be people over profit. But in this country, it is profit over lives. '}, {'emotion': 'Sadness', 'intensity': '3', 'reason': 'we need school'}, {…
500	WI-Sen: Here s why a candidate s ad shows her sitting with a gun nearby	anonymous-source/all_shooting_images_newest/10148.jpg	[{'emotion': 'Disgust', 'intensity': '1', 'reason': 'this image kind of confuses me but I feel like the us political system is sort of corrupt to keep preexisting policy in place'}, {'emotion': 'Sadness', 'intensity': '2', 'reason': 'I feel sad because the image is dark and serious. The woman looks sad. I can tell something tragic happened here, and I am emotionally preparing to hear the story.'}…
503	Vista, Maker of Ammunition and Recreation Gear, Plans to Sell Off Gun-Making Unit	anonymous-source/all_shooting_images_newest/10480.jpg	[{'emotion': 'Disgust', 'intensity': '3', 'reason': "I don't think guns should be as accessible as they are in the US"}, {'emotion': 'Disgust', 'intensity': '1', 'reason': 'I do not feel any strong emotions when looking at this image. Bullets do disgust me, but just seeing them does not make me feel any strong feelings.'}, {'emotion': 'Fear', 'intensity': '5', 'reason': 'All those bullets can tak…
505	Memorial Service, 5K Among Events Marking Las Vegas Shooting	anonymous-source/all_shooting_images_newest/90420.jpg	[{'emotion': 'Sadness', 'intensity': '2', 'reason': 'because this implies that people died and that makes me sad'}, {'emotion': 'Sadness', 'intensity': '2', 'reason': 'I am sad because I can tell these are probably victims of gun violence. However, the image is far away and warm, so I do not feel a strong emotional connection to them.'}, {'emotion': 'Sadness', 'intensity': '5', 'reason': "people …
508	Gun control advocate wins upset in Ga. House race	anonymous-source/all_shooting_images_newest/110295.jpg	[{'emotion': 'Contentment', 'intensity': '1', 'reason': "I don't feel anything looking at this I don't know who she is"}, {'emotion': 'Sadness', 'intensity': '2', 'reason': "I feel sadness because I know this person is either a survivor themselves or affiliated with a survivor. However, I don't know their story and their facial expression is neutral. So, I do not feel too strongly."}, {'emotion':…
509	Prominent Republican Donor Issues Ultimatum on Assault Weapons	anonymous-source/all_shooting_images_newest/10011.jpg	[{'emotion': 'Contentment', 'intensity': '1', 'reason': "this doesn't make me feel anything I don't know who this is"}, {'emotion': 'Disgust', 'intensity': '1', 'reason': 'I do not know who this man is. I feel disgust because I know he is a Republican, due to the elephant on his bookshelf. However, I feel no strong emotions.'}, {'emotion': 'Contentment', 'intensity': '1', 'reason': 'not sure who …
512	Trump Still Stands By Arming People Following Pittsburgh Synagogue Shooting	anonymous-source/all_shooting_images_newest/100491.jpg	[{'emotion': 'Disgust', 'intensity': '2', 'reason': "I don't agree with his policies and I think he's gross"}, {'emotion': 'Anger', 'intensity': '5', 'reason': 'I hate Donald Trump for many reasons. In the context of gun violence, I hate him because he did not do more to prevent it.'}, {'emotion': 'Anger', 'intensity': '5', 'reason': "It's trump and I can't stand anything he stand for."}, {'emoti…
513	Assault weapons ban moves forward in Deerfield, April vote likely	anonymous-source/all_shooting_images_newest/10482.jpg	[{'emotion': 'Disgust', 'intensity': '1', 'reason': "guns are killing machines and I don't think everyone should have them"}, {'emotion': 'Fear', 'intensity': '3', 'reason': 'I always feel fear when I see a gun.'}, {'emotion': 'Fear', 'intensity': '5', 'reason': 'I do not like seeing active guns. '}, {'emotion': 'Fear', 'intensity': '3', 'reason': 'I am worried that one day I might be shot by one…
515	11 questions on gun laws and mental health: How Cincinnati shooter purchased a gun legally	anonymous-source/all_shooting_images_newest/90430.jpg	[{'emotion': 'Sadness', 'intensity': '4', 'reason': 'so many people have died from guns and nothing has been done to fix the problem'}, {'emotion': 'Awe', 'intensity': '4', 'reason': 'This picture is extremely impactful. It hits me hard emotionally and inspires me to make change.'}, {'emotion': 'Sadness', 'intensity': '5', 'reason': "I agree it's been enough yet we still have active shootings."},…
518	Kentucky fair officials to propose ban on 'items of hate' after Nazi, KKK memorabilia sold at gun show | TheHill	anonymous-source/all_shooting_images_newest/110300.jpg	[{'emotion': 'Disgust', 'intensity': '3', 'reason': 'nazism should not be associated with Christmas it disgusts me to think that anyone would buy this'}, {'emotion': 'Disgust', 'intensity': '5', 'reason': 'This is racist and hateful.'}, {'emotion': 'Fear', 'intensity': '5', 'reason': "I'm Jewish. "}, {'emotion': 'Anger', 'intensity': '3', 'reason': "it's not funny and it should not be a joke. "},…
519	Florida 'stand your ground' shooter had history of gun threats: Complaint	anonymous-source/all_shooting_images_newest/1.jpg	[{'emotion': 'Fear', 'intensity': '3', 'reason': 'scary looking white men are especially scary '}, {'emotion': 'Disgust', 'intensity': '3', 'reason': 'I feel disgust because this man is in prison which implies something bad '}, {'emotion': 'Fear', 'intensity': '5', 'reason': 'I feel fear at people that use guns to harm people'}, {'emotion': 'Disgust', 'intensity': '3', 'reason': 'looks like a bad…
520	Texans turn to God as school rocked by latest shooting	anonymous-source/all_shooting_images_newest/10090.jpg	[{'emotion': 'Sadness', 'intensity': '4', 'reason': 'it makes me feel horrible seeing parents who have lost their children early'}, {'emotion': 'Sadness', 'intensity': '3', 'reason': 'I feel sad because these people look broken which implies maybe the lost loved ones'}, {'emotion': 'Sadness', 'intensity': '4', 'reason': 'I feel sad for people that are harmed by guns'}, {'emotion': 'Sadness', 'int…
522	Health Care, Gun Control And The Environment Will Rule The Florida Governor Race	anonymous-source/all_shooting_images_newest/481.jpg	[{'emotion': 'Contentment', 'intensity': '2', 'reason': "blue means democrat which is hopefully more left leaning (but usually isn't)"}, {'emotion': 'Contentment', 'intensity': '3', 'reason': 'I feel content because this man is speaking about what he believes in '}, {'emotion': 'Excitement', 'intensity': '4', 'reason': 'I feel excited for people that want to end gun violence'}, {'emotion': 'Conte…
529	Florida man threatened people 3 different times before shooting man in 'stand your ground' case	anonymous-source/all_shooting_images_newest/7.jpg	[{'emotion': 'Fear', 'intensity': '2', 'reason': "there's so much scarring footage of gun violence happening"}, {'emotion': 'Sadness', 'intensity': '3', 'reason': 'I feel sad because it looks like this is a shooting '}, {'emotion': 'Fear', 'intensity': '4', 'reason': 'I feel fear about people that are harmed by guns because that can also be myself'}, {'emotion': 'Fear', 'intensity': '2', 'reason'…
530	7 ways to help prevent school shootings	anonymous-source/all_shooting_images_newest/10169.jpg	[{'emotion': 'Sadness', 'intensity': '2', 'reason': 'these families are being reunited but at what cost'}, {'emotion': 'Sadness', 'intensity': '3', 'reason': 'I feel sad because of the emotions on this girls face'}, {'emotion': 'Sadness', 'intensity': '4', 'reason': 'I feel sad for people that are harmed by guns'}, {'emotion': 'Sadness', 'intensity': '2', 'reason': 'loss of loved one'}, {'emotion…
536	The feds were watching, but unlicensed gun dealer was still able to sell Glock that killed Chicago police officer	anonymous-source/all_shooting_images_newest/100471.jpg	[{'emotion': 'Sadness', 'intensity': '2', 'reason': 'are these people heroes or are they just victims?'}, {'emotion': 'Sadness', 'intensity': '3', 'reason': 'I feel sad because this is a funeral '}, {'emotion': 'Disgust', 'intensity': '4', 'reason': 'I feel disgust about people that use their influence to allow guns that harm people'}, {'emotion': 'Sadness', 'intensity': '2', 'reason': 'loss of l…
537	Program prepares students for mass shooting by teaching combat medicine	anonymous-source/all_shooting_images_newest/110501.jpg	[{'emotion': 'Sadness', 'intensity': '3', 'reason': "active shooter trainings and first aid shouldn't be necessary."}, {'emotion': 'Fear', 'intensity': '3', 'reason': 'I feel fear because this seems odd'}, {'emotion': 'Sadness', 'intensity': '4', 'reason': 'I feel sad for people that are harmed by guns'}, {'emotion': 'Contentment', 'intensity': '2', 'reason': 'i dont know what that is'}, {'emotio…
538	Gun control group targets firearms owners with new ads, seeks common ground	anonymous-source/all_shooting_images_newest/32.jpg	[{'emotion': 'Sadness', 'intensity': '2', 'reason': 'some victims are just so young.'}, {'emotion': 'Sadness', 'intensity': '3', 'reason': 'I feel sad because this boy seems confused'}, {'emotion': 'Sadness', 'intensity': '4', 'reason': 'I feel sad about people that do not take gun violence seriously'}, {'emotion': 'Sadness', 'intensity': '2', 'reason': 'probably a loved was killed by guns'}, {'e…
540	Trump woos NRA gun lobby in Dallas	anonymous-source/all_shooting_images_newest/10118.jpg	[{'emotion': 'Contentment', 'intensity': '3', 'reason': 'its Donald'}, {'emotion': 'Amusement', 'intensity': '2', 'reason': 'i cannot believe he was in office'}, {'emotion': 'Amusement', 'intensity': '3', 'reason': 'funny looking guy'}, {'emotion': 'Excitement', 'intensity': '3', 'reason': 'Rich facial expressions '}, {'emotion': 'Disgust', 'intensity': '5', 'reason': 'Any image of donald trump m…
543	Florida police confiscate guns for the first time under state s new gun-control laws	anonymous-source/all_shooting_images_newest/10161.jpg	[{'emotion': 'Contentment', 'intensity': '3', 'reason': 'its a gun'}, {'emotion': 'Fear', 'intensity': '3', 'reason': 'same reason for fear above'}, {'emotion': 'Contentment', 'intensity': '3', 'reason': 'interesting looking gun collection '}, {'emotion': 'Fear', 'intensity': '3', 'reason': 'No emotions are raised '}, {'emotion': 'Fear', 'intensity': '3', 'reason': 'The thought and sight of a gun…
545	Vegas garden gives families, shooting victims place to mourn	anonymous-source/all_shooting_images_newest/90043.jpg	[{'emotion': 'Excitement', 'intensity': '3', 'reason': 'I love art'}, {'emotion': 'Anger', 'intensity': '4', 'reason': 'life has been taken by gun violence'}, {'emotion': 'Sadness', 'intensity': '3', 'reason': 'loss of loved ones is sad'}, {'emotion': 'Sadness', 'intensity': '3', 'reason': 'Feeling of empathy '}, {'emotion': 'Sadness', 'intensity': '3', 'reason': 'I could not imagine losing a lov…
546	Gunman who killed 2 at Florida yoga studio had history of harassing young women	anonymous-source/all_shooting_images_newest/110507.jpg	[{'emotion': 'Fear', 'intensity': '3', 'reason': 'police are there'}, {'emotion': 'Fear', 'intensity': '4', 'reason': 'reminds me of the shooting i was in'}, {'emotion': 'Contentment', 'intensity': '3', 'reason': 'police doing their jobs'}, {'emotion': 'Fear', 'intensity': '3', 'reason': 'Feeling of insecure '}, {'emotion': 'Fear', 'intensity': '3', 'reason': 'This scene could happen anywhere. It…
550	Trump's stance on gun regulation has evolved after series of mass shootings	anonymous-source/all_shooting_images_newest/10119.jpg	[{'emotion': 'Amusement', 'intensity': '3', 'reason': 'donny is funny'}, {'emotion': 'Disgust', 'intensity': '1', 'reason': 'body posture'}, {'emotion': 'Amusement', 'intensity': '3', 'reason': 'DT looking funny'}, {'emotion': 'Amusement', 'intensity': '3', 'reason': 'Not serious facial expressions '}, {'emotion': 'Disgust', 'intensity': '5', 'reason': 'I feel extremely negatively towards this ph…
553	New Jersey is one of the latest states to enact new gun control measures	anonymous-source/all_shooting_images_newest/10214.jpg	[{'emotion': 'Fear', 'intensity': '3', 'reason': 'guns kill people'}, {'emotion': 'Disgust', 'intensity': '4', 'reason': 'too many guns'}, {'emotion': 'Disgust', 'intensity': '3', 'reason': 'probably illegally bought weapons'}, {'emotion': 'Fear', 'intensity': '3', 'reason': 'No emotions are raised '}, {'emotion': 'Fear', 'intensity': '5', 'reason': 'Seeing so many of an item that kills people ma…
556	Yoga studio shooter posted racist, misogynistic videos	anonymous-source/all_shooting_images_newest/110509.jpg	[{'emotion': 'Fear', 'intensity': '3', 'reason': 'police suck'}, {'emotion': 'Fear', 'intensity': '3', 'reason': 'reminds me of the shooting i was in'}, {'emotion': 'Sadness', 'intensity': '3', 'reason': 'probably a bad crime committed here'}, {'emotion': 'Fear', 'intensity': '3', 'reason': 'Dizzy lightning '}, {'emotion': 'Fear', 'intensity': '3', 'reason': 'I feel sad because because of gun vio…
560	Trump is uniquely positioned to cut a deal to prevent school shootings	anonymous-source/all_shooting_images_newest/10659.jpg	[{'emotion': 'Sadness', 'intensity': '5', 'reason': 'She is probably a mother who lost her child in school shooting.'}, {'emotion': 'Sadness', 'intensity': '3', 'reason': 'I feel heartbroken when I saw the girl crying'}, {'emotion': 'Sadness', 'intensity': '5', 'reason': 'Losing a loved one is the hardest thing in the world'}, {'emotion': 'Sadness', 'intensity': '4', 'reason': 'the lady looks to …
563	Study claiming US is home of one-third of mass-shooters worldwide debunked; figure less than 1.5 percent	anonymous-source/all_shooting_images_newest/90304.jpg	[{'emotion': 'Sadness', 'intensity': '4', 'reason': 'In this such a beautiful place another gun violence happened'}, {'emotion': 'Fear', 'intensity': '3', 'reason': 'There must be a murder happened here'}, {'emotion': 'Fear', 'intensity': '2', 'reason': 'I wonder what happened but it seems serious'}, {'emotion': 'Fear', 'intensity': '4', 'reason': 'this place looks like an open public space that …
564	YouTube to Ban Videos Promoting Gun Sales	anonymous-source/all_shooting_images_newest/10277.jpg	[{'emotion': 'Fear', 'intensity': '4', 'reason': "Anyone can purchase guns with Federal Firearm License. Don't know how strict the examination is."}, {'emotion': 'Fear', 'intensity': '3', 'reason': 'I really hate and afraid guns '}, {'emotion': 'Awe', 'intensity': '1', 'reason': "I don't know why people love machines that are built to kill people so much"}, {'emotion': 'Fear', 'intensity': '4', '…
566	Trump dubs California bar shooter 'sick puppy' as community grieves	anonymous-source/all_shooting_images_newest/110128.jpg	[{'emotion': 'Sadness', 'intensity': '5', 'reason': "The mood of this picture is just so sad. We don't want any parents to lose their children anymore."}, {'emotion': 'Sadness', 'intensity': '3', 'reason': 'I feel so sad to see people crying'}, {'emotion': 'Sadness', 'intensity': '4', 'reason': 'These people look like they lost someone'}, {'emotion': 'Sadness', 'intensity': '4', 'reason': 'it loo…
569	Parkland School Shooter Blames Massacre on a Demon Voice	anonymous-source/all_shooting_images_newest/418.jpg	[{'emotion': 'Anger', 'intensity': '4', 'reason': 'This is what he deserves'}, {'emotion': 'Anger', 'intensity': '3', 'reason': 'He did something hurt others and it makes me angry'}, {'emotion': 'Disgust', 'intensity': '5', 'reason': "Fuck this guy i can't believe we're the same species "}, {'emotion': 'Disgust', 'intensity': '5', 'reason': 'this man was a school shooter and murdered innocent chi…
570	Student survivors of mass shooting say they're disappointed in lawmakers, but vow to keep fighting	anonymous-source/all_shooting_images_newest/10697.jpg	[{'emotion': 'Sadness', 'intensity': '5', 'reason': "It's the living who suffer the most."}, {'emotion': 'Sadness', 'intensity': '3', 'reason': "I'm so sad to see she is crying"}, {'emotion': 'Sadness', 'intensity': '5', 'reason': 'Someone being comforted after losing someone'}, {'emotion': 'Sadness', 'intensity': '5', 'reason': 'this girl appears to have lost someone that was close to her due to…
580	Students Lead Huge Rallies for Gun Control Across the U.S.	anonymous-source/all_shooting_images_newest/10218.jpg	[{'emotion': 'Sadness', 'intensity': '4', 'reason': 'These two people looks pretty worried, which might indicate something bad just happened'}, {'emotion': 'Sadness', 'intensity': '4', 'reason': 'POC/minorities in the US have to constantly live in fear because no change is being made. '}, {'emotion': 'Awe', 'intensity': '4', 'reason': "I'm inspired by them, but also sad of what they likely have b…
584	Gun control vs. mental health care: debate after mass shootings obscures murky reality	anonymous-source/all_shooting_images_newest/110337.jpg	[{'emotion': 'Fear', 'intensity': '4', 'reason': 'The bullets are put into the magazine, which means someone plans to shoot with the pistol. It makes me feel fear.'}, {'emotion': 'Fear', 'intensity': '4', 'reason': "there's just no need for ordinary citizens to own guns in today's society. "}, {'emotion': 'Awe', 'intensity': '3', 'reason': 'How has it come to the point where this is necessary for…
586	That's it no more guns.	anonymous-source/all_shooting_images_newest/100483.jpg	[{'emotion': 'Sadness', 'intensity': '5', 'reason': 'The picture tells me that someone that this lady knows might be killed in a gun violence, which makes me feel sad'}, {'emotion': 'Sadness', 'intensity': '4', 'reason': 'how many more lives will it take?'}, {'emotion': 'Sadness', 'intensity': '4', 'reason': 'Powerful photograph, shows grief very well'}, {'emotion': 'Sadness', 'intensity': '5', '…
588	The Day After Jacksonville's Mass Shooting, They Held Another Gaming Tournament	anonymous-source/all_shooting_images_newest/75.jpg	[{'emotion': 'Sadness', 'intensity': '1', 'reason': "I don't know how this picture will be connected to gun violence. Is these two guys the victim or gunner of a gun violence incident?"}, {'emotion': 'Anger', 'intensity': '1', 'reason': 'not sure what the context of this photo is. but i do see two guys see playing video games. many video games are violent.'}, {'emotion': 'Sadness', 'intensity': '…
589	Teen who allegedly wore white supremacy shirt at Lake County college pleads guilty to weapons charge	anonymous-source/all_shooting_images_newest/18.jpg	[{'emotion': 'Fear', 'intensity': '2', 'reason': "The guy looks dangerous by his expression and the background looks like the prison. Though I don't know who is guy is. Is he the victim or gunner of a gun violence incident?"}, {'emotion': 'Fear', 'intensity': '3', 'reason': "To be honest, I have no idea who this is but because this looks like a mugshot I'm going to assume he is another shooter. "…
590	School safety bill introduced by bipartisan senators in response to Florida shooting	anonymous-source/all_shooting_images_newest/10240.jpg	[{'emotion': 'Fear', 'intensity': '2', 'reason': 'Given the context of gun violence, these groups of people might be escaping from a gun violence scene, which makes me feel fear.'}, {'emotion': 'Sadness', 'intensity': '4', 'reason': "we're become desensitized to this culture. "}, {'emotion': 'Sadness', 'intensity': '3', 'reason': "I can't really tell what this is, but if it's students getting awa…
591	Trump on Florida shooting: 'I'd run in there' even without gun	anonymous-source/all_shooting_images_newest/10430.jpg	[{'emotion': 'Amusement', 'intensity': '4', 'reason': "I hate Trump's policy of pro-gun, but this gesture is so hilarious."}, {'emotion': 'Anger', 'intensity': '5', 'reason': 'I am against everything Trump stands for. '}, {'emotion': 'Anger', 'intensity': '4', 'reason': 'I wonder how many guns he kept at the white house'}, {'emotion': 'Anger', 'intensity': '5', 'reason': 'Trump and his conservati…
594	One Big Loser on Black Friday? Gun Sales	anonymous-source/all_shooting_images_newest/110453.jpg	[{'emotion': 'Fear', 'intensity': '5', 'reason': 'The close-up picture of so many pistols towards me makes me feel fear.'}, {'emotion': 'Fear', 'intensity': '5', 'reason': 'killing device. '}, {'emotion': 'Sadness', 'intensity': '1', 'reason': 'Stock images of guns only do so much'}, {'emotion': 'Fear', 'intensity': '3', 'reason': 'I do not like guns and their accessibility is frightening. '}, {'…
596	Community mourns after mass shooting at Pittsburgh synagogue	anonymous-source/all_shooting_images_newest/100490.jpg	[{'emotion': 'Sadness', 'intensity': '5', 'reason': 'People are preying for the victims in the gun violence incident.'}, {'emotion': 'Sadness', 'intensity': '4', 'reason': 'how many more lives will it take. '}, {'emotion': 'Sadness', 'intensity': '2', 'reason': 'Vigils are always sad to me'}, {'emotion': 'Sadness', 'intensity': '3', 'reason': "so many people have lost their lives that could've be…
597	What boycotting the NRA accomplishes.	anonymous-source/all_shooting_images_newest/10059.jpg	[{'emotion': 'Anger', 'intensity': '5', 'reason': 'The NRA is the source of pro-gun policy because they can make money for that. It makes me feel angry.'}, {'emotion': 'Disgust', 'intensity': '4', 'reason': 'I disagree with every stance the NRA takes. '}, {'emotion': 'Anger', 'intensity': '4', 'reason': "I don't want to join the NRA"}, {'emotion': 'Anger', 'intensity': '5', 'reason': "The NRA's l…
599	What the FBI Knew About the Accused Florida School Shooter and When	anonymous-source/all_shooting_images_newest/10780.jpg	[{'emotion': 'Anger', 'intensity': '5', 'reason': 'This guy must have done something wrong.'}, {'emotion': 'Anger', 'intensity': '3', 'reason': 'in the context of gun violence, this person shot someone, no one should defend that'}, {'emotion': 'Disgust', 'intensity': '3', 'reason': 'the criminal seem not to feel any regrets of shooting others.'}, {'emotion': 'Fear', 'intensity': '4', 'reason': 'I…
600	Parkland Shooter's Rifle Magazines Were Etched With Swastikas: Reports	anonymous-source/all_shooting_images_newest/10026.jpg	[{'emotion': 'Fear', 'intensity': '4', 'reason': 'They are forced to do something.'}, {'emotion': 'Sadness', 'intensity': '3', 'reason': 'these people look like children...'}, {'emotion': 'Fear', 'intensity': '3', 'reason': "the people's lives are being threatened by the men who hold guns."}, {'emotion': 'Disgust', 'intensity': '5', 'reason': 'It is disgusting to see how sick this shooter was. Th…
601	We've Been Waiting for You.' Barack Obama Praises the Teen Shooting Survivors Fighting for Gun Control	anonymous-source/all_shooting_images_newest/10409.jpg	[{'emotion': 'Excitement', 'intensity': '4', 'reason': 'Gun laws should be backed.'}, {'emotion': 'Awe', 'intensity': '3', 'reason': 'great that he supports them... but what is he going to do about it'}, {'emotion': 'Awe', 'intensity': '3', 'reason': 'the president is promising a future with more gun regulations.'}, {'emotion': 'Contentment', 'intensity': '4', 'reason': 'It is nice to see that po…
603	Gamers plead for more security after deadly Jacksonville shooting	anonymous-source/all_shooting_images_newest/137.jpg	[{'emotion': 'Fear', 'intensity': '4', 'reason': 'It looks like the police are investigating the crime scene'}, {'emotion': 'Sadness', 'intensity': '3', 'reason': 'the sheer amount of cops is kinda telling'}, {'emotion': 'Fear', 'intensity': '3', 'reason': 'the police seems to be warning the people in this nearby areas about the criminals who might be surrounding there.'}, {'emotion': 'Sadness', …
604	Let's avoid tragedy': Police warn against giving toy guns as presents this holiday season	anonymous-source/all_shooting_images_newest/110172.jpg	[{'emotion': 'Disgust', 'intensity': '3', 'reason': 'All guns should be controlled.'}, {'emotion': 'Disgust', 'intensity': '3', 'reason': 'they look too similar.'}, {'emotion': 'Amusement', 'intensity': '3', 'reason': 'it is hard to differentiate which is real and fake gun.'}, {'emotion': 'Amusement', 'intensity': '4', 'reason': 'It is scary that people would even think about giving fake guns as …
606	Las Vegas shooting memorial marks grim anniversary: 'None of us will ever be the same'	anonymous-source/all_shooting_images_newest/100440.jpg	[{'emotion': 'Sadness', 'intensity': '5', 'reason': 'There are so many people died because of guns.'}, {'emotion': 'Sadness', 'intensity': '3', 'reason': 'no one should have to die at the barrel of a gun'}, {'emotion': 'Sadness', 'intensity': '3', 'reason': 'many people have died from the gun violence.'}, {'emotion': 'Sadness', 'intensity': '4', 'reason': 'This headline serves as a reminder. Usua…
609	Parkland shooting suspect seen 'smiling and giggling' in jail, records show	anonymous-source/all_shooting_images_newest/10902.jpg	[{'emotion': 'Anger', 'intensity': '5', 'reason': 'This guy must have done something wrong.'}, {'emotion': 'Anger', 'intensity': '3', 'reason': "is this the same kid as the first picture??? i'm gonna assume he was a shooter"}, {'emotion': 'Anger', 'intensity': '2', 'reason': 'the criminal has hurt lots of people.'}, {'emotion': 'Anger', 'intensity': '5', 'reason': 'this headline makes me feel ver…
610	These Are The Victims Of The Santa Fe High School Shooting	anonymous-source/all_shooting_images_newest/10044.jpg	[{'emotion': 'Sadness', 'intensity': '5', 'reason': 'They are crying. They appear to be victims'}, {'emotion': 'Sadness', 'intensity': '3', 'reason': 'they seem to be at a memorial... those are kids and an adult... people shouldnt have to go through this'}, {'emotion': 'Sadness', 'intensity': '3', 'reason': 'the family is crying about their loss of another family member due to gun violence.'}, {'…
613	It must always be people over profits': Jacksonville shooting survivors to file lawsuit	anonymous-source/all_shooting_images_newest/165.jpg	[{'emotion': 'Fear', 'intensity': '3', 'reason': 'This picture looks very depressing.'}, {'emotion': 'Sadness', 'intensity': '3', 'reason': 'i know exactly what happened there'}, {'emotion': 'Amusement', 'intensity': '3', 'reason': "there's nothing bad happen in the picture. "}, {'emotion': 'Sadness', 'intensity': '2', 'reason': 'In some ways, no monetary value can fix what happened to these surv…
614	Glendale Police Department to host anonymous gun buyback event	anonymous-source/all_shooting_images_newest/110179.jpg	[{'emotion': 'Fear', 'intensity': '3', 'reason': "I'm afraid of these guns."}, {'emotion': 'Anger', 'intensity': '3', 'reason': 'too many guns.'}, {'emotion': 'Fear', 'intensity': '3', 'reason': "there's a lot of weapon on the table."}, {'emotion': 'Excitement', 'intensity': '4', 'reason': 'It is exciting to see that local police are taking action in support of gun regulation. It makes me feel ho…
615	Parkland gun policy agenda: Here's where every House member stands	anonymous-source/all_shooting_images_newest/10549.jpg	[{'emotion': 'Excitement', 'intensity': '4', 'reason': 'She is fighting for gun laws.'}, {'emotion': 'Sadness', 'intensity': '3', 'reason': 'i know exactly where this is from. i watched the speech and cried'}, {'emotion': 'Awe', 'intensity': '3', 'reason': 'the woman is standing up to confess her feeling and thoughts to the crowd.'}, {'emotion': 'Fear', 'intensity': '4', 'reason': 'The members of…
616	Community, Religious Leaders Say Pittsburgh Synagogue Shooting 'Will Not Break Us' At Vigil	anonymous-source/all_shooting_images_newest/100445.jpg	[{'emotion': 'Sadness', 'intensity': '3', 'reason': 'They are crying. They appear to be victims'}, {'emotion': 'Sadness', 'intensity': '3', 'reason': 'i also know what this is from... no one deserves to experience this'}, {'emotion': 'Contentment', 'intensity': '3', 'reason': 'the two people seems to not see each other for a long time.'}, {'emotion': 'Sadness', 'intensity': '5', 'reason': 'I feel…
620	Son, I love you': Heartbreaking stories emerge of Thousand Oaks mass shooting victims - ABC News	anonymous-source/all_shooting_images_newest/110517.jpg	[{'emotion': 'Sadness', 'intensity': '1', 'reason': 'They look like they just went through something, something bad just happened'}, {'emotion': 'Sadness', 'intensity': '4', 'reason': 'i feel really sad because the woman is crying, seems like she just experienced some thing scared.'}, {'emotion': 'Sadness', 'intensity': '4', 'reason': 'I feel they might experience something bad before, maybe frie…
625	Right-Wing Pundit Taunts Survivors of Parkland Shooting for Losing Weapons-Ban Vote in Florida Legislature	anonymous-source/all_shooting_images_newest/10066.jpg	[{'emotion': 'Sadness', 'intensity': '1', 'reason': 'The vibe means someone pass away, probably because of a shooting'}, {'emotion': 'Sadness', 'intensity': '4', 'reason': 'i feel sad because i think the woman is mourning for someone she loved but now left her forever. '}, {'emotion': 'Sadness', 'intensity': '4', 'reason': 'There are so many people dying because of gun violence. I feel sorry and …
627	Levi Strauss teams up with gun control group: We simply cannot stand by silently	anonymous-source/all_shooting_images_newest/90097.jpg	[{'emotion': 'Awe', 'intensity': '1', 'reason': "I don't know how they are related"}, {'emotion': 'Amusement', 'intensity': '2', 'reason': 'according to the gun violence, these are just nothing. '}, {'emotion': 'Amusement', 'intensity': '3', 'reason': "Actually, I don't get what the picture is trying to talk about."}, {'emotion': 'Amusement', 'intensity': '1', 'reason': "Levi Strauss doesn't imme…
628	Pharrell Sent Trump Cease-And-Desist Letter For Playing Happy After Synagogue Shooting	anonymous-source/all_shooting_images_newest/100239.jpg	[{'emotion': 'Sadness', 'intensity': '1', 'reason': 'His eye make me feel so sad'}, {'emotion': 'Sadness', 'intensity': '3', 'reason': "i don't think he has any energy to face any problem. "}, {'emotion': 'Sadness', 'intensity': '3', 'reason': 'I am thinking about the relationship between racism and gun violence.'}, {'emotion': 'Contentment', 'intensity': '1', 'reason': "I wouldn't know who this …
629	Kroger Shooting Suspect Is Charged With Hate Crimes in Killings of 2 Black People - The New York Times	anonymous-source/all_shooting_images_newest/110186.jpg	[{'emotion': 'Disgust', 'intensity': '1', 'reason': 'This image gives a feeling that this man should be criticized'}, {'emotion': 'Disgust', 'intensity': '3', 'reason': 'i think he is regretting the thing he did before. '}, {'emotion': 'Anger', 'intensity': '3', 'reason': 'I hate gun violence and people who use guns to hurt others.'}, {'emotion': 'Disgust', 'intensity': '1', 'reason': "he definit…
633	The Americas Account for Half of Annual Gun Deaths Worldwide	anonymous-source/all_shooting_images_newest/376.jpg	[{'emotion': 'Fear', 'intensity': '1', 'reason': "Guns are being sold like brooms, it doesn't look safe"}, {'emotion': 'Disgust', 'intensity': '5', 'reason': 'i still think that gun is the source of all the evilness happen. '}, {'emotion': 'Fear', 'intensity': '3', 'reason': 'I am afraid that when more states are permitted to buy guns, like in the picture, there will be more unavoidable gun viole…
634	Gun owners group vows to sue after Washington state passes tough new regulations | Fox News	anonymous-source/all_shooting_images_newest/110479.jpg	[{'emotion': 'Fear', 'intensity': '1', 'reason': 'This move looks aggressive and gives a feeling of tension'}, {'emotion': 'Anger', 'intensity': '5', 'reason': 'it makes me feel angry because gun makes the violence but they gave me a feeling that they admired the gun. '}, {'emotion': 'Fear', 'intensity': '4', 'reason': 'Since the man in the picture takes a gun, I feel more afraid about the use of…
635	15 Students Have Been Arrested for Threatening School Violence since Parkland Shooting, Officials Say	anonymous-source/all_shooting_images_newest/10100.jpg	[{'emotion': 'Sadness', 'intensity': '4', 'reason': 'They are suffering from the loss of a loved one and it affects me too'}, {'emotion': 'Sadness', 'intensity': '5', 'reason': 'i think the all flowers are not just flowers, they are the love for the people who died because of the gun. '}, {'emotion': 'Sadness', 'intensity': '3', 'reason': 'I feel sad for people whose family members or friends hav…
637	Levi Strauss teams up with Bloomberg to create gun control group: Simply cannot stand by silently	anonymous-source/all_shooting_images_newest/90197.jpg	[{'emotion': 'Awe', 'intensity': '1', 'reason': "I don't know how they are related"}, {'emotion': 'Amusement', 'intensity': '5', 'reason': 'i actually can not really related this to gun violence, so i feel really calm. '}, {'emotion': 'Contentment', 'intensity': '3', 'reason': 'I feel hard to get what the picture wants to talk about or anything related to gun violence. '}, {'emotion': 'Amusement'…
639	Dementia complicates US gun ownership	anonymous-source/all_shooting_images_newest/10699.jpg	[{'emotion': 'Fear', 'intensity': '1', 'reason': 'There is still gun violence outside.'}, {'emotion': 'Fear', 'intensity': '3', 'reason': 'Guns are scary'}, {'emotion': 'Fear', 'intensity': '3', 'reason': 'he is holding a gun'}, {'emotion': 'Fear', 'intensity': '3', 'reason': 'It seems like a picture for evidence'}, {'emotion': 'Fear', 'intensity': '1', 'reason': "Looks like an average man holdin…
642	The Latest: NRA president campaigns for GOP candidate Hawley	anonymous-source/all_shooting_images_newest/110351.jpg	[{'emotion': 'Excitement', 'intensity': '1', 'reason': 'I cannot tell anything from this picture. '}, {'emotion': 'Sadness', 'intensity': '3', 'reason': 'sad'}, {'emotion': 'Contentment', 'intensity': '3', 'reason': 'she is proud'}, {'emotion': 'Disgust', 'intensity': '3', 'reason': 'Politician'}, {'emotion': 'Contentment', 'intensity': '1', 'reason': 'The woman looks nice and she looks happy.'},…
643	The Gun Business Is Bouncing Back From a Long Trump Slump	anonymous-source/all_shooting_images_newest/90116.jpg	[{'emotion': 'Fear', 'intensity': '1', 'reason': 'There is still gun violence outside.'}, {'emotion': 'Fear', 'intensity': '3', 'reason': 'guns are scary'}, {'emotion': 'Fear', 'intensity': '3', 'reason': 'gun'}, {'emotion': 'Contentment', 'intensity': '1', 'reason': "No idea why there isn't a neutral emotion for this, so I'll just choose contentment"}, {'emotion': 'Fear', 'intensity': '1', 'reas…
644	ACLU urges schools not to interfere with student gun control protests	anonymous-source/all_shooting_images_newest/10230.jpg	[{'emotion': 'Sadness', 'intensity': '1', 'reason': 'There is still gun violence outside.'}, {'emotion': 'Sadness', 'intensity': '3', 'reason': 'sad that students have to fight for this '}, {'emotion': 'Awe', 'intensity': '3', 'reason': 'ppl are working so hard'}, {'emotion': 'Sadness', 'intensity': '3', 'reason': 'It will happen again, because the people in power and the masses that support them…
645	Trump s Response to the Pittsburgh Shooting Proves He Doesn t Actually Care About Religious Liberty	anonymous-source/all_shooting_images_newest/100178.jpg	[{'emotion': 'Sadness', 'intensity': '1', 'reason': 'There is still gun violence outside.'}, {'emotion': 'Sadness', 'intensity': '3', 'reason': 'sad that lives were taken'}, {'emotion': 'Awe', 'intensity': '3', 'reason': 'dont know what happen'}, {'emotion': 'Sadness', 'intensity': '4', 'reason': "It's very clearly after a tragic event"}, {'emotion': 'Sadness', 'intensity': '1', 'reason': 'The po…
646	Michigan's top court hearing cases over guns at schools	anonymous-source/all_shooting_images_newest/10164.jpg	[{'emotion': 'Sadness', 'intensity': '1', 'reason': 'There is still gun violence outside.'}, {'emotion': 'Sadness', 'intensity': '3', 'reason': 'most likely connected to a shooting so its sad'}, {'emotion': 'Sadness', 'intensity': '3', 'reason': 'school and teenagers'}, {'emotion': 'Contentment', 'intensity': '1', 'reason': 'It is just a school'}, {'emotion': 'Sadness', 'intensity': '1', 'reason'…
649	State won't do business with Bank of America, Citi over their gun policies	anonymous-source/all_shooting_images_newest/189.jpg	[{'emotion': 'Fear', 'intensity': '1', 'reason': 'There is still gun violence outside.'}, {'emotion': 'Fear', 'intensity': '3', 'reason': 'guns are scary'}, {'emotion': 'Fear', 'intensity': '3', 'reason': 'gun'}, {'emotion': 'Contentment', 'intensity': '1', 'reason': 'Just seems a like a stock image of a gun'}, {'emotion': 'Fear', 'intensity': '1', 'reason': "i don't know who is holding the guns …
653	Judge strikes down California ban on storefront handgun ads	anonymous-source/all_shooting_images_newest/90120.jpg	[{'emotion': 'Fear', 'intensity': '1', 'reason': 'There is still gun violence outside.'}, {'emotion': 'Fear', 'intensity': '3', 'reason': 'guns are scary'}, {'emotion': 'Fear', 'intensity': '3', 'reason': 'gun'}, {'emotion': 'Contentment', 'intensity': '1', 'reason': 'Just seems to be a stock image of a gun'}, {'emotion': 'Fear', 'intensity': '1', 'reason': "I don't like guns and the power that t…
654	NW Indiana students face detention, praise during walkout advocating gun reform	anonymous-source/all_shooting_images_newest/10237.jpg	[{'emotion': 'Sadness', 'intensity': '3', 'reason': 'There is still gun violence outside.'}, {'emotion': 'Sadness', 'intensity': '3', 'reason': 'sad that students have to fight for this'}, {'emotion': 'Awe', 'intensity': '3', 'reason': 'ppl marching'}, {'emotion': 'Sadness', 'intensity': '4', 'reason': 'Seeing kids who died for no reason'}, {'emotion': 'Sadness', 'intensity': '2', 'reason': 'The …
655	Eiffel Tower, Empire State Building Go Dark To Honor Pittsburgh Synagogue Shooting Victims	anonymous-source/all_shooting_images_newest/100207.jpg	[{'emotion': 'Amusement', 'intensity': '1', 'reason': 'The Eiffel Tower is beautiful. '}, {'emotion': 'Sadness', 'intensity': '3', 'reason': 'the lighting is very sad'}, {'emotion': 'Fear', 'intensity': '3', 'reason': 'gun'}, {'emotion': 'Sadness', 'intensity': '4', 'reason': "A gesture that shouldn't need to be made. More examples of mass shootings"}, {'emotion': 'Sadness', 'intensity': '1', 're…
656	When a second-grader pointed a gun at me, I'm glad I wasn't armed	anonymous-source/all_shooting_images_newest/10479.jpg	[{'emotion': 'Sadness', 'intensity': '1', 'reason': 'what we did cannot protect our children. '}, {'emotion': 'Fear', 'intensity': '3', 'reason': 'probably showing something about shootings in schools so sad'}, {'emotion': 'Contentment', 'intensity': '3', 'reason': 'dont understand'}, {'emotion': 'Contentment', 'intensity': '1', 'reason': 'Stock image of hands in a school setting'}, {'emotion': '…
658	Rosanne Cash on California Shootings: We Use Young People as Collateral Damage for the Second Amendment	anonymous-source/all_shooting_images_newest/110472.jpg	[{'emotion': 'Sadness', 'intensity': '1', 'reason': 'There is still gun violence outside.'}, {'emotion': 'Sadness', 'intensity': '3', 'reason': 'sad'}, {'emotion': 'Sadness', 'intensity': '3', 'reason': 'i dont know'}, {'emotion': 'Disgust', 'intensity': '2', 'reason': 'Reminds me of country music which has ties to a republican base which love guns'}, {'emotion': 'Contentment', 'intensity': '1', …
659	Pittsburgh shooting: Alleged gunman posted stream of anti-Semitic hate online in months and moments before attack	anonymous-source/all_shooting_images_newest/100064.jpg	[{'emotion': 'Fear', 'intensity': '3', 'reason': "Don't judge a book by its cover but he looks like someone who could support gun violence"}, {'emotion': 'Fear', 'intensity': '4', 'reason': "seems like it's a picture on news about people who conduct crime"}, {'emotion': 'Fear', 'intensity': '3', 'reason': 'He seems guilty of crime.'}, {'emotion': 'Anger', 'intensity': '3', 'reason': 'I hate him a…
663	Pittsburgh synagogue shooting, mail bombs show US 'toxic' discourse spurs 'deranged' people to act: Ex-DHS chief	anonymous-source/all_shooting_images_newest/100372.jpg	[{'emotion': 'Fear', 'intensity': '5', 'reason': 'I feel fear because this looks like a scene from after a shooting or if there was currently a shooting ongoing'}, {'emotion': 'Fear', 'intensity': '4', 'reason': 'there are many armed people in the image'}, {'emotion': 'Sadness', 'intensity': '3', 'reason': 'Seems like the police were brought into a peaceful and non-violent environment. '}, {'emot…
666	Thousands Gather to Honor Victims of the Mass Shooting with Tears, Candlelight and Song	anonymous-source/all_shooting_images_newest/110414.jpg	[{'emotion': 'Sadness', 'intensity': '5', 'reason': 'This seems to relate to one of the previous captions with tears, candlelights, and songs. A lot of people definitely gathered after a mass shooting to remember the lives lost'}, {'emotion': 'Sadness', 'intensity': '4', 'reason': 'people hold candles and the women is crying'}, {'emotion': 'Sadness', 'intensity': '5', 'reason': "It looks like the…
670	Health care tops guns, economy as voters' top issue	anonymous-source/all_shooting_images_newest/100090.jpg	[{'emotion': 'Sadness', 'intensity': '4', 'reason': 'Most likely a victim of a shooting, it is heart breaking to see what families have to go through after an event like that.'}, {'emotion': 'Sadness', 'intensity': '3', 'reason': 'seems like a person is ill'}, {'emotion': 'Sadness', 'intensity': '4', 'reason': 'Looks like someone getting treatment for their wounds. '}, {'emotion': 'Sadness', 'int…
675	The standout moments that made CNN's gun control town hall feel like a game-changer	anonymous-source/all_shooting_images_newest/10872.jpg	[{'emotion': 'Sadness', 'intensity': '5', 'reason': 'it is someone who is protesting against gun-violence and anti-gun rights. Likely someone who has a family member that experienced a tragedy or was part of the tragedy themselves.'}, {'emotion': 'Sadness', 'intensity': '4', 'reason': 'the movement about gun control touches me'}, {'emotion': 'Excitement', 'intensity': '3', 'reason': 'Makes me fee…
676	I wanted him to feel compassion : The Jewish nurse who treated the synagogue shooting suspect tells his story	anonymous-source/all_shooting_images_newest/110477.jpg	[{'emotion': 'Sadness', 'intensity': '5', 'reason': 'Looks like the aftermath of a shooting, it is heart breaking to see these scenes especially since it is children that is affected'}, {'emotion': 'Sadness', 'intensity': '4', 'reason': 'people are mourning for the victim(s)'}, {'emotion': 'Sadness', 'intensity': '3', 'reason': 'The woman seems to be mourning over a tragic event. This saddens me.…
679	Kroger shooting suspect apparently sought access to mostly black church before slayings	anonymous-source/all_shooting_images_newest/100439.jpg	[{'emotion': 'Fear', 'intensity': '3', 'reason': 'the guy looks so scary '}, {'emotion': 'Fear', 'intensity': '3', 'reason': 'the image looks like a headshot of a gunman'}, {'emotion': 'Disgust', 'intensity': '4', 'reason': "its a mug shot of an active shooter. He took lives he didn't have to take."}, {'emotion': 'Fear', 'intensity': '3', 'reason': 'it looks like a mugshot and he looks scary'}, {…
680	Mother of Thousand Oaks Victim: I Don t Want Prayers. I Don t Want Thoughts. I Want Gun Control.	anonymous-source/all_shooting_images_newest/110241.jpg	[{'emotion': 'Contentment', 'intensity': '3', 'reason': 'the people looks so united and i feel content for the unity the have '}, {'emotion': 'Sadness', 'intensity': '1', 'reason': "it seems that people are grieving over a tragedy caused by gun violence but I can't be sure that is what this event is which is why it is mild"}, {'emotion': 'Sadness', 'intensity': '4', 'reason': 'people have been lo…
682	Trump to Visit Pittsburgh After Shooting at Synagogue	anonymous-source/all_shooting_images_newest/100060.jpg	[{'emotion': 'Disgust', 'intensity': '3', 'reason': "i don't like trump so seeing him makes me feel disgust "}, {'emotion': 'Disgust', 'intensity': '4', 'reason': "I don't like Trump and what he stands for "}, {'emotion': 'Disgust', 'intensity': '5', 'reason': "I can't stand trump"}, {'emotion': 'Anger', 'intensity': '2', 'reason': 'there is many emotions here because trump sometimes believes in …
683	Plastic 3D guns printed at home will raise threat level for everyone, especially Congress	anonymous-source/all_shooting_images_newest/110.jpg	[{'emotion': 'Amusement', 'intensity': '1', 'reason': 'looks like a toy '}, {'emotion': 'Fear', 'intensity': '4', 'reason': 'it worries me that there is a plastic model of a gun'}, {'emotion': 'Sadness', 'intensity': '3', 'reason': 'guns are becoming too accessible'}, {'emotion': 'Fear', 'intensity': '4', 'reason': '3d printed guns seem to becoming more popular. '}, {'emotion': 'Fear', 'intensity…
685	The solution to mass shootings has nothing to do with mental illness | TheHill	anonymous-source/all_shooting_images_newest/110270.jpg	[{'emotion': 'Contentment', 'intensity': '4', 'reason': 'seeing people march is very powerful. seeing what they are marching for makes me feel content '}, {'emotion': 'Contentment', 'intensity': '4', 'reason': 'it makes me sad that young people have still have to advocate for ending gun violence but I am hopeful that they are trying to create change'}, {'emotion': 'Awe', 'intensity': '4', 'reason…
686	Condolences Aren't Enough.' The Gaming Community Responds After Deadly Jacksonville Madden Shooting	anonymous-source/all_shooting_images_newest/170.jpg	[{'emotion': 'Fear', 'intensity': '2', 'reason': 'it looks like something bad has happened'}, {'emotion': 'Fear', 'intensity': '3', 'reason': 'I feel worried as this looks like a crime scene where a shooting had taken place'}, {'emotion': 'Sadness', 'intensity': '3', 'reason': 'It seems to be the aftermath of an active shooting'}, {'emotion': 'Sadness', 'intensity': '4', 'reason': 'this makes me …
689	Robert Bowers, alleged Pittsburgh synagogue gunman, left trail of chilling, anti-Semitic social media posts	anonymous-source/all_shooting_images_newest/100448.jpg	[{'emotion': 'Sadness', 'intensity': '3', 'reason': 'this guy looks like a lost elderly and i feel sad for him and the family that lost him '}, {'emotion': 'Anger', 'intensity': '1', 'reason': 'it seems like a potential headshot of a gunman but there is also no context so it may be a victim'}, {'emotion': 'Contentment', 'intensity': '3', 'reason': 'no clue who this is and am unsure if it is a vic…
690	It's a Twitter war: Doctors clash with NRA over gun deaths	anonymous-source/all_shooting_images_newest/110244.jpg	[{'emotion': 'Awe', 'intensity': '3', 'reason': 'it looks like the women is showing her family picture to someone, and the picture looks cute '}, {'emotion': 'Sadness', 'intensity': '5', 'reason': "it is tragic to see people's families being broken by gun violence"}, {'emotion': 'Sadness', 'intensity': '5', 'reason': 'people of color are targeted too much. They are being killed in masses due to r…
693	Gun Rights Activists Defy Court Ruling, Post 3D-Printed Gun Blueprints Online	anonymous-source/all_shooting_images_newest/114.jpg	[{'emotion': 'Amusement', 'intensity': '3', 'reason': 'toy guns '}, {'emotion': 'Fear', 'intensity': '3', 'reason': 'I am worried that there is models of guns that look like toys'}, {'emotion': 'Sadness', 'intensity': '3', 'reason': 'guns are becoming too accessible.'}, {'emotion': 'Fear', 'intensity': '3', 'reason': 'based on the writing in the back it seems like the 3d printed guns have become …
694	I voted against an assault weapons ban. Here s why I changed my mind.	anonymous-source/all_shooting_images_newest/100331.jpg	[{'emotion': 'Fear', 'intensity': '3', 'reason': 'gun selling is scary '}, {'emotion': 'Anger', 'intensity': '3', 'reason': 'I am upset that assault weapons are so accessible '}, {'emotion': 'Fear', 'intensity': '4', 'reason': 'of how easy it is to buy an automatic gun.'}, {'emotion': 'Disgust', 'intensity': '5', 'reason': 'why are there sales on weapons. that seems so stupid. '}, {'emotion': 'Fe…
695	Vote for our lives': youth turnout could jump after Parkland shooting	anonymous-source/all_shooting_images_newest/110393.jpg	[{'emotion': 'Sadness', 'intensity': '3', 'reason': 'their face looks sad and it is sad that this is something we have to protest about '}, {'emotion': 'Sadness', 'intensity': '4', 'reason': 'I feel sad that there is so much gun violence in schools and young children are affected by this'}, {'emotion': 'Awe', 'intensity': '5', 'reason': 'I support the youths and how they are working to get their …
696	Esports Organizers Criticize USA Gun Laws After Shooting at Madden 19 Tournament	anonymous-source/all_shooting_images_newest/221.jpg	[{'emotion': 'Excitement', 'intensity': '1', 'reason': 'something is happening '}, {'emotion': 'Fear', 'intensity': '3', 'reason': 'I feel worried because it seems like a crime scene'}, {'emotion': 'Sadness', 'intensity': '2', 'reason': 'it looks like an active shooting scene. I feel bad if someone died.'}, {'emotion': 'Sadness', 'intensity': '3', 'reason': 'it seems like a shooting had just happ…
700	Slowik: Thanksgiving Day food drive to honor Rich Central victim of gun violence	anonymous-source/all_shooting_images_newest/110123.jpg	[{'emotion': 'Sadness', 'intensity': '3', 'reason': 'this young man looks really happy and his life may be about to change because of gun violence. '}, {'emotion': 'Contentment', 'intensity': '3', 'reason': 'happy kid without gun'}, {'emotion': 'Awe', 'intensity': '3', 'reason': "I'm not sure whether or not this boy was a shooter or a victim of a shooting, so I can't exactly say an explicit emoti…
704	Does the U.S. lead the world in mass shootings?	anonymous-source/all_shooting_images_newest/90350.jpg	[{'emotion': 'Disgust', 'intensity': '3', 'reason': 'there is just no need for that many guns'}, {'emotion': 'Anger', 'intensity': '3', 'reason': 'gun should only be owned by qualified people'}, {'emotion': 'Fear', 'intensity': '5', 'reason': 'It is again scary that anyone can buy a gun.'}, {'emotion': 'Disgust', 'intensity': '3', 'reason': 'a mass array of firearms '}, {'emotion': 'Fear', 'inten…
705	Gun control groups far out-spending gun rights groups for 2018 midterms first time in 20-plus years	anonymous-source/all_shooting_images_newest/100478.jpg	[{'emotion': 'Awe', 'intensity': '3', 'reason': 'people protesting about gun violence is inspiring and we need more of it '}, {'emotion': 'Excitement', 'intensity': '3', 'reason': 'gun should only be owned by qualified people'}, {'emotion': 'Awe', 'intensity': '5', 'reason': 'I want to be at this anti-gun protest. '}, {'emotion': 'Excitement', 'intensity': '2', 'reason': 'protest against guns, i …
706	E-Sports World Is Rocked as Gunman Clearly Targeted Other Gamers	anonymous-source/all_shooting_images_newest/50.jpg	[{'emotion': 'Sadness', 'intensity': '3', 'reason': 'I believe this picture means there was gun violence at a pizza place? getting a slice of pizza should be a safe activity to do. '}, {'emotion': 'Contentment', 'intensity': '3', 'reason': 'no gun = peace'}, {'emotion': 'Fear', 'intensity': '3', 'reason': 'it is scary that anyone can be shot from anywhere, like this pizza shop.'}, {'emotion': 'Sa…
710	Another day of funerals as Pittsburgh mourns synagogue shooting victims	anonymous-source/all_shooting_images_newest/110143.jpg	[{'emotion': 'Awe', 'intensity': '5', 'reason': 'this is a picture that really shows America still has some humanity left '}, {'emotion': 'Sadness', 'intensity': '3', 'reason': 'what a person'}, {'emotion': 'Sadness', 'intensity': '3', 'reason': "I do not necessarily what is going on here, but I'm guessing the people in the image are victims of shootings, which brings me much sadness."}, {'emotio…
714	California Gov. Jerry Brown signs bill banning gun sales to people under 21	anonymous-source/all_shooting_images_newest/90370.jpg	[{'emotion': 'Sadness', 'intensity': '3', 'reason': "I don't understand why these men are interested in buying guns"}, {'emotion': 'Excitement', 'intensity': '3', 'reason': 'gun should be banned '}, {'emotion': 'Fear', 'intensity': '4', 'reason': 'It is again scary that anyone can buy a gun.'}, {'emotion': 'Fear', 'intensity': '3', 'reason': 'group of teenagers looking for the perfect firearm to …
716	After Jacksonville shooting, is it too early to talk about gun laws? Today's talker	anonymous-source/all_shooting_images_newest/76.jpg	[{'emotion': 'Sadness', 'intensity': '4', 'reason': 'so many gun-related incidents occur literally everyday in our country '}, {'emotion': 'Excitement', 'intensity': '3', 'reason': 'gun should be banned '}, {'emotion': 'Sadness', 'intensity': '4', 'reason': 'It is again scary that shootings can take place anywhere.'}, {'emotion': 'Fear', 'intensity': '3', 'reason': 'gun violence crime scene with …
722	The NRA's Dana Loesch Says Brett Kavanaugh Has Been the Victim of 'Matriarchal Insane Attacks' by Gillibrand, Harris	anonymous-source/all_shooting_images_newest/90212.jpg	[{'emotion': 'Sadness', 'intensity': '2', 'reason': "We have different ideas to the use of guns. Some people think it's okay and easy. Some think it's a serious problem."}, {'emotion': 'Sadness', 'intensity': '3', 'reason': "I don't know who they are it made me feel nothing"}, {'emotion': 'Amusement', 'intensity': '3', 'reason': 'woman smiling on left, perhaps good thing happened on right side'},…
724	NRA sues Florida over plan to put age limits on rifle purchases	anonymous-source/all_shooting_images_newest/10305.jpg	[{'emotion': 'Fear', 'intensity': '4', 'reason': "It's like in a shop, which means everyone can buy guns. It makes me feel fearful because I feel insecure. "}, {'emotion': 'Fear', 'intensity': '3', 'reason': 'Those are scary guns that no one should own except for the military '}, {'emotion': 'Fear', 'intensity': '2', 'reason': 'no clue what he will do with the gun'}, {'emotion': 'Fear', 'intensit…
726	Protesters say security guard Jemel Roberson was proverbial 'good guy with a gun' but was fatally shot by police anyway - Daily Southtown	anonymous-source/all_shooting_images_newest/110197.jpg	[{'emotion': 'Anger', 'intensity': '2', 'reason': 'Since people in the picture are black people. I think there are something related to gun use and racism. I feel angry and unfair about it.'}, {'emotion': 'Sadness', 'intensity': '3', 'reason': 'Innocent people died'}, {'emotion': 'Sadness', 'intensity': '4', 'reason': 'disappointed in society and sad for what happened'}, {'emotion': 'Amusement', …
729	Cruz biological mother's past a factor in school shooting	anonymous-source/all_shooting_images_newest/90014.jpg	[{'emotion': 'Sadness', 'intensity': '2', 'reason': 'I feel sorry to the person who was hut by this man, but I also feel sorry for the man because he will be in jail for long because what he has done.'}, {'emotion': 'Sadness', 'intensity': '4', 'reason': 'He is a bad person.'}, {'emotion': 'Excitement', 'intensity': '1', 'reason': 'criminal convicted, feel justice in work'}, {'emotion': 'Contentm…
733	Trump's indefensible response to the synagogue shooting draws outrage	anonymous-source/all_shooting_images_newest/100095.jpg	[{'emotion': 'Sadness', 'intensity': '2', 'reason': 'With police stand by, i feel someone use gun, or someone is hurt by guns.'}, {'emotion': 'Sadness', 'intensity': '3', 'reason': 'Looks like a shooting/hate crime'}, {'emotion': 'Fear', 'intensity': '2', 'reason': 'police in scene so after crime but ambulance concerns me'}, {'emotion': 'Sadness', 'intensity': '1', 'reason': "someone must've died…
734	I now actually do want to take your guns. All of your guns. Right now, magazine editor declares	anonymous-source/all_shooting_images_newest/10316.jpg	[{'emotion': 'Fear', 'intensity': '2', 'reason': 'i feel so insecure with so many guns probably put in a shop. I am a afraid that people buy them and hurt others.'}, {'emotion': 'Disgust', 'intensity': '3', 'reason': "Shotguns aren't needed"}, {'emotion': 'Disgust', 'intensity': '2', 'reason': 'not clear what the guns are for'}, {'emotion': 'Disgust', 'intensity': '1', 'reason': 'this store posse…
736	Vigil held for victims of California bar shooting	anonymous-source/all_shooting_images_newest/110235.jpg	[{'emotion': 'Sadness', 'intensity': '4', 'reason': 'Because someone hug each other. I feel something bad may happen because of gun violence, and people are trying to console each other a little bit.'}, {'emotion': 'Fear', 'intensity': '3', 'reason': 'Nothing, not sure what is happening.'}, {'emotion': 'Sadness', 'intensity': '4', 'reason': 'sad for victim and family'}, {'emotion': 'Amusement', '…
739	Police: Florida man threatened to shoot 'weak Republicans' who voted against Kavanaugh confirmation	anonymous-source/all_shooting_images_newest/100252.jpg	[{'emotion': 'Fear', 'intensity': '2', 'reason': 'I do not know this person, the events, nor the circumstances.'}, {'emotion': 'Fear', 'intensity': '2', 'reason': 'he looks mad and aggressive, might hurt somebody'}, {'emotion': 'Sadness', 'intensity': '3', 'reason': ','}, {'emotion': 'Fear', 'intensity': '3', 'reason': 'This seems like a image of a shooting suspect.'}, {'emotion': 'Fear', 'intens…
740	Unbearable grief': Pakistani parents of Santa Fe school shooting victim warn of gun culture in US	anonymous-source/all_shooting_images_newest/110117.jpg	[{'emotion': 'Sadness', 'intensity': '3', 'reason': 'I perceive mourning and so feel sympathetic to their possible situation. '}, {'emotion': 'Sadness', 'intensity': '3', 'reason': "They look very sad, I'm sorry to hear that."}, {'emotion': 'Sadness', 'intensity': '3', 'reason': '.'}, {'emotion': 'Sadness', 'intensity': '3', 'reason': 'It seems like they have loss someone close in shooting.'}, {'…
741	Once a 'proud NRA sellout,' Putnam won't say if he'd use term again	anonymous-source/all_shooting_images_newest/10669.jpg	[{'emotion': 'Amusement', 'intensity': '1', 'reason': 'I do not know this person but his tie choice is interesting.'}, {'emotion': 'Awe', 'intensity': '1', 'reason': 'he looks like talk something serious'}, {'emotion': 'Sadness', 'intensity': '3', 'reason': '.'}, {'emotion': 'Awe', 'intensity': '3', 'reason': 'I wonder what his take is on gun control.'}, {'emotion': 'Awe', 'intensity': '1', 'reas…
742	New Jersey governor proposes strengthening gun laws after Pittsburgh synagogue mass shooting	anonymous-source/all_shooting_images_newest/100005.jpg	[{'emotion': 'Amusement', 'intensity': '1', 'reason': 'His forehead is huge.'}, {'emotion': 'Awe', 'intensity': '2', 'reason': 'he looks like talk something serious'}, {'emotion': 'Sadness', 'intensity': '3', 'reason': '.'}, {'emotion': 'Awe', 'intensity': '3', 'reason': 'I wonder what he is saying, he seems like making a serious claim.'}, {'emotion': 'Awe', 'intensity': '2', 'reason': 'he looks …
743	Don't panic about 3D gun printing. Yet.	anonymous-source/all_shooting_images_newest/27.jpg	[{'emotion': 'Amusement', 'intensity': '1', 'reason': "It looks like a little toy gun but I'm not really sure what it is"}, {'emotion': 'Fear', 'intensity': '1', 'reason': 'It looks like a 3D printed gun'}, {'emotion': 'Sadness', 'intensity': '3', 'reason': '.'}, {'emotion': 'Fear', 'intensity': '3', 'reason': '3D printing for gun is just resulting in looser gun control.'}, {'emotion': 'Fear', 'i…
744	Detroit-area lawmaker targeting ammunition sales in gun control push	anonymous-source/all_shooting_images_newest/90263.jpg	[{'emotion': 'Awe', 'intensity': '3', 'reason': "It's amazing to me how Walmart can sell you lettuce and a hunting rifle in the same building."}, {'emotion': 'Awe', 'intensity': '1', 'reason': 'people are buying guns, they look serious.'}, {'emotion': 'Sadness', 'intensity': '3', 'reason': '.'}, {'emotion': 'Fear', 'intensity': '3', 'reason': 'It is just scary to see people purchase guns.'}, {'em…
746	Trump Says Classmates Knew Florida Shooting Suspect 'Was a Big Problem' and Should Have Reported Him	anonymous-source/all_shooting_images_newest/10897.jpg	[{'emotion': 'Sadness', 'intensity': '1', 'reason': 'I feel sad about what tragic event would require such response from authorities.'}, {'emotion': 'Fear', 'intensity': '4', 'reason': 'Too many police cars, ambulances, fire trucks, something bad just happened'}, {'emotion': 'Sadness', 'intensity': '3', 'reason': '.'}, {'emotion': 'Sadness', 'intensity': '3', 'reason': 'Kids are the most innocent…
749	Kentucky grocery store gunman reportedly told bystander 'whites don't shoot whites'	anonymous-source/all_shooting_images_newest/100260.jpg	[{'emotion': 'Fear', 'intensity': '1', 'reason': 'The terribly shot image makes the subject look threatening and so alarms me.'}, {'emotion': 'Fear', 'intensity': '2', 'reason': 'He looks irritable and gets out of control'}, {'emotion': 'Sadness', 'intensity': '3', 'reason': '.'}, {'emotion': 'Fear', 'intensity': '3', 'reason': 'This image looks like a picture of a shooting suspect, which is real…
750	Suspect arrested in Alabama mall shooting; protests continue Associated Press	anonymous-source/all_shooting_images_newest/110118.jpg	[{'emotion': 'Sadness', 'intensity': '5', 'reason': 'Fallen soldiers make me sad as they are mostly children sent to die by the rich folk.'}, {'emotion': 'Sadness', 'intensity': '1', 'reason': 'They look very sad and it affects me too'}, {'emotion': 'Sadness', 'intensity': '3', 'reason': '.'}, {'emotion': 'Sadness', 'intensity': '3', 'reason': 'they seem like family of victims of mass shooting.'}…
754	California Gov. Jerry Brown signs bill banning gun sales to people under 21, citing Parkland	anonymous-source/all_shooting_images_newest/90282.jpg	[{'emotion': 'Excitement', 'intensity': '5', 'reason': 'I am excited to own my first rifle and seeing so many in stock is exciting.'}, {'emotion': 'Fear', 'intensity': '1', 'reason': 'The walls are covered with weapons that can easily kill humans'}, {'emotion': 'Sadness', 'intensity': '3', 'reason': '.'}, {'emotion': 'Fear', 'intensity': '3', 'reason': 'It is just scary to see guns all laid out l…
756	In Jacksonville, the $1 Billion-a-Year World of Esports is Rocked by Gunfire	anonymous-source/all_shooting_images_newest/33.jpg	[{'emotion': 'Sadness', 'intensity': '3', 'reason': 'Police taping down an area always spells tragedy and loss and that saddens me.'}, {'emotion': 'Fear', 'intensity': '1', 'reason': 'something bad must happened since the officer just lockdown the area.'}, {'emotion': 'Sadness', 'intensity': '3', 'reason': '.'}, {'emotion': 'Sadness', 'intensity': '3', 'reason': 'It just means there are more vict…
758	Druckenmiller: Trump's approach to trade is 'like a little kid that found this water gun'	anonymous-source/all_shooting_images_newest/90501.jpg	[{'emotion': 'Awe', 'intensity': '1', 'reason': "I'm in awe about how ignorant I feel as the individual looks important but I cannot feel anything since I don't know anything about him."}, {'emotion': 'Amusement', 'intensity': '1', 'reason': 'He seems to be saying something not very serious'}, {'emotion': 'Sadness', 'intensity': '3', 'reason': '.'}, {'emotion': 'Awe', 'intensity': '3', 'reason': …
765	Texas school gunman 'confused,' his lawyers say	anonymous-source/all_shooting_images_newest/10209.jpg	[{'emotion': 'Sadness', 'intensity': '3', 'reason': 'This is a cemetery implying death '}, {'emotion': 'Sadness', 'intensity': '4', 'reason': 'All I see are lives lost due to gun violence and that is just supper sad to think about. '}, {'emotion': 'Sadness', 'intensity': '4', 'reason': 'I feel sorry for people dead from gun violence'}, {'emotion': 'Sadness', 'intensity': '4', 'reason': 'its sad t…
769	Michigan man to be sentenced for shooting at lost black teen	anonymous-source/all_shooting_images_newest/110503.jpg	[{'emotion': 'Fear', 'intensity': '3', 'reason': 'Not sure what this image is but the man looks like he is wearing prison attire '}, {'emotion': 'Sadness', 'intensity': '4', 'reason': 'This guys looks poor, old, and sad. Looks like he just lost someone due to gun violence. '}, {'emotion': 'Contentment', 'intensity': '3', 'reason': 'criminals are getting punished'}, {'emotion': 'Sadness', 'intensi…
771	Trump Blames Democrats For Lack Of Gun Control Laws	anonymous-source/all_shooting_images_newest/10810.jpg	[{'emotion': 'Disgust', 'intensity': '3', 'reason': 'I do not agree with his policies '}, {'emotion': 'Disgust', 'intensity': '3', 'reason': "I just don't like Trump and all the values that he represents. "}, {'emotion': 'Disgust', 'intensity': '3', 'reason': 'the look on this man pisses me off'}, {'emotion': 'Disgust', 'intensity': '1', 'reason': "i don't know the context behind the photo so i f…
773	Maker of 3D-printed guns begins selling blueprints, despite court order	anonymous-source/all_shooting_images_newest/262.jpg	[{'emotion': 'Fear', 'intensity': '3', 'reason': 'Guns are a weapon so this makes me fearful '}, {'emotion': 'Fear', 'intensity': '3', 'reason': 'Not sure why this gun is covered in plastic, or maybe this is a metaphor??\r\nFear because I am afraid of guns and the death they might bring to our world. '}, {'emotion': 'Amusement', 'intensity': '3', 'reason': 'this toy gun should be harmless'}, {'em…
775	Parkland students sent letter of support from Dunblane shooting massacre survivors	anonymous-source/all_shooting_images_newest/10221.jpg	[{'emotion': 'Sadness', 'intensity': '3', 'reason': 'This seems like a memorial '}, {'emotion': 'Awe', 'intensity': '4', 'reason': 'wow this just warms my heart. I see that people do care about each other and that there is love. '}, {'emotion': 'Sadness', 'intensity': '4', 'reason': 'I feel sorry for victims of gun violence'}, {'emotion': 'Sadness', 'intensity': '4', 'reason': 'its sad to think p…
776	Synagogue gunman kills 11 in America's worst anti-Semitic attack	anonymous-source/all_shooting_images_newest/100069.jpg	[{'emotion': 'Sadness', 'intensity': '3', 'reason': 'Sad because someone is hurt'}, {'emotion': 'Sadness', 'intensity': '4', 'reason': 'This looks like the scene of gun violence, which made me think about death and loss, especially with the presence of an ambulance. '}, {'emotion': 'Fear', 'intensity': '3', 'reason': 'people are getting hurt from gun violence'}, {'emotion': 'Fear', 'intensity': '…
779	New Mexico Compound: Alleged Muslim Extremists Who Trained Children to Carry Out School Shootings Have Charges Dropped	anonymous-source/all_shooting_images_newest/135.jpg	[{'emotion': 'Fear', 'intensity': '3', 'reason': 'Extremist charges are necessary and should not be dropped'}, {'emotion': 'Anger', 'intensity': '3', 'reason': 'it depicts a man in a mugshot with no context so it forces us to automatically villify him'}, {'emotion': 'Fear', 'intensity': '3', 'reason': 'This mugshot makes me feel fear and very uneasy.'}, {'emotion': 'Fear', 'intensity': '3', 'reas…
784	Justices Won t Hear Case on Waiting Period for Gun Purchases	anonymous-source/all_shooting_images_newest/10183.jpg	[{'emotion': 'Anger', 'intensity': '3', 'reason': 'The gun problem is serious and the justices need to analyze these particular cases'}, {'emotion': 'Disgust', 'intensity': '3', 'reason': "it looks as if it's NRA related so I can already guess the context."}, {'emotion': 'Amusement', 'intensity': '1', 'reason': 'this image did not make me feel any emotions as it is simply a generic image of a gun…
786	Las Vegas shooting victims honored in emotional anniversary ceremony: 'Our 58 angels are with us'	anonymous-source/all_shooting_images_newest/100497.jpg	[{'emotion': 'Sadness', 'intensity': '3', 'reason': 'The victims were unable to see this recognition, and their deaths add more evidence to the topic of managing the gun problem'}, {'emotion': 'Sadness', 'intensity': '3', 'reason': "I know it's related to the Vegas shooting and that shooting is heartbreaking."}, {'emotion': 'Sadness', 'intensity': '4', 'reason': 'This image is certainly about the…
793	America's increasing moral panic over active shooters is overblown and counterproductive	anonymous-source/all_shooting_images_newest/444.jpg	[{'emotion': 'Fear', 'intensity': '3', 'reason': "It turns out that many American shooters don't know how to use guns in a controlled manner, and their practices have caused panic"}, {'emotion': 'Fear', 'intensity': '3', 'reason': 'who knows the situation that they are possibly preparing for and it makes me anxious.'}, {'emotion': 'Fear', 'intensity': '2', 'reason': 'This police officers in the i…
796	Temple Israel, Gary community mourns Pittsburgh shooting victims: 'We come together to condemn the violence and hate'	anonymous-source/all_shooting_images_newest/110007.jpg	[{'emotion': 'Sadness', 'intensity': '3', 'reason': 'Violence and hatred should be condemned, it is not good for human development'}, {'emotion': 'Sadness', 'intensity': '3', 'reason': 'I feel like this could be for some type of funeral because of the candles so it makes me sad for anyone who was lost.'}, {'emotion': 'Sadness', 'intensity': '2', 'reason': 'It is sad to see this image as this seem…
797	NRA spokeswoman pushes back on raising age for buying semiautomatic rifles, an idea Trump has suggested	anonymous-source/all_shooting_images_newest/10216.jpg	[{'emotion': 'Anger', 'intensity': '3', 'reason': 'The gun problem is age-related but cannot be limited by initiatives to raise the purchase age alone, as this does not address the root of the problem'}, {'emotion': 'Disgust', 'intensity': '3', 'reason': 'I saw the word conservative and just immediately felt uneasy.'}, {'emotion': 'Contentment', 'intensity': '4', 'reason': 'This woman have a very…
798	Jacksonville 'mass shooting' sparks reaction from political figures: 'Horrifying news'	anonymous-source/all_shooting_images_newest/123.jpg	[{'emotion': 'Fear', 'intensity': '3', 'reason': 'The frequency of mass shootings should be taken seriously, leading to restrictions on gun use'}, {'emotion': 'Awe', 'intensity': '3', 'reason': "whatever this place is, it is incredibly large so I'm just in awe."}, {'emotion': 'Sadness', 'intensity': '2', 'reason': 'I felt sadness from this image and it seems to be the site of a mass shooting.'}, …
799	How Many States Will Pass Gun-Control Laws Before Recess?	anonymous-source/all_shooting_images_newest/10579.jpg	[{'emotion': 'Anger', 'intensity': '3', 'reason': 'looks like a gun convention'}, {'emotion': 'Anger', 'intensity': '3', 'reason': 'looks like a gun convention'}, {'emotion': 'Fear', 'intensity': '2', 'reason': 'I do not know what is going on in this photo which makes me anxious because it reminds me of the January 6th riots. '}, {'emotion': 'Excitement', 'intensity': '3', 'reason': 'new laws'}, …
803	Calstrs to Engage With Assault-Weapon Sellers First, Divest Last	anonymous-source/all_shooting_images_newest/10063.jpg	[{'emotion': 'Disgust', 'intensity': '3', 'reason': 'people collect guns'}, {'emotion': 'Disgust', 'intensity': '3', 'reason': 'people collect guns'}, {'emotion': 'Anger', 'intensity': '4', 'reason': 'Guns are weapons of mass destruction and they should not be displayed like toys, this makes me angry. '}, {'emotion': 'Fear', 'intensity': '3', 'reason': 'harmful weapons'}, {'emotion': 'Fear', 'int…
804	People across the country come together to condemn gun violence Video	anonymous-source/all_shooting_images_newest/10227.jpg	[{'emotion': 'Excitement', 'intensity': '4', 'reason': 'people are taking a stand'}, {'emotion': 'Excitement', 'intensity': '4', 'reason': 'people are taking a stand'}, {'emotion': 'Awe', 'intensity': '4', 'reason': 'I am proud of the organization March for Our Lives and I am so proud to witness everything they have done. '}, {'emotion': 'Excitement', 'intensity': '3', 'reason': 'looks happy'}, {…
805	Pittsburgh Steelers to hold moment of silence to honor victims of synagogue shooting	anonymous-source/all_shooting_images_newest/100151.jpg	[{'emotion': 'Sadness', 'intensity': '4', 'reason': 'too many lives lost'}, {'emotion': 'Sadness', 'intensity': '4', 'reason': 'too many lives lost'}, {'emotion': 'Sadness', 'intensity': '4', 'reason': 'This image makes me feel sad because I am assuming it is a memorial to those who have lost their lives to gun violence.'}, {'emotion': 'Sadness', 'intensity': '3', 'reason': 'someone died'}, {'emo…
807	Texas state lawmaker shares image linking gun control to the Holocaust	anonymous-source/all_shooting_images_newest/10530.jpg	[{'emotion': 'Sadness', 'intensity': '3', 'reason': 'of how true this is'}, {'emotion': 'Sadness', 'intensity': '3', 'reason': 'of how true this is'}, {'emotion': 'Sadness', 'intensity': '4', 'reason': 'it seems like there is nothing we can do to fight for stricter gun reform and that history is bound to repeat itself which makes me sad. '}, {'emotion': 'Sadness', 'intensity': '3', 'reason': 'som…
809	How America s hunting culture shaped masculinity, environmentalism, and the NRA	anonymous-source/all_shooting_images_newest/10688.jpg	[{'emotion': 'Disgust', 'intensity': '4', 'reason': 'people shoot animals for fun'}, {'emotion': 'Disgust', 'intensity': '4', 'reason': 'people shoot animals for fun'}, {'emotion': 'Anger', 'intensity': '5', 'reason': 'This image makes me angry because children are being taught to use violent weapons which is completely unnecessary. '}, {'emotion': 'Fear', 'intensity': '3', 'reason': 'killing'}, …
813	Limited engagement: Top funds backed gunmaker Ruger board despite no talks	anonymous-source/all_shooting_images_newest/88.jpg	[{'emotion': 'Fear', 'intensity': '4', 'reason': 'The guns and the focus on triggers create a feeling of high pressure.'}, {'emotion': 'Contentment', 'intensity': '3', 'reason': "it's just a picture of a bunch of guns with no context"}, {'emotion': 'Fear', 'intensity': '1', 'reason': "That's a lot of guns."}, {'emotion': 'Fear', 'intensity': '3', 'reason': 'I feel fear.'}, {'emotion': 'Excitement…
816	Santa Fe High School had armed cops and active shooter drills. Yet 10 people died.	anonymous-source/all_shooting_images_newest/10160.jpg	[{'emotion': 'Sadness', 'intensity': '4', 'reason': 'students were hurt here'}, {'emotion': 'Sadness', 'intensity': '4', 'reason': 'students were hurt here'}, {'emotion': 'Anger', 'intensity': '5', 'reason': 'This image makes me angry because it displays yet another school that has had gun violence or shoot shooting incidents. This is completely preventable and could have not happened if we had s…
823	Warning signs may have been missed in school shooting case	anonymous-source/all_shooting_images_newest/10790.jpg	[{'emotion': 'Fear', 'intensity': '4', 'reason': 'Why would you need all those weapons in your bedroom? sick'}, {'emotion': 'Fear', 'intensity': '5', 'reason': 'The fact that someone can acquire that many guns is very scary. Also, the fact that the picture is taken so casually, with the guns appearing to be on a bed, is scary to me as well.'}, {'emotion': 'Sadness', 'intensity': '3', 'reason': '.…
824	Parents of Parkland students start PAC to take on NRA-backed candidates	anonymous-source/all_shooting_images_newest/10200.jpg	[{'emotion': 'Sadness', 'intensity': '3', 'reason': 'I support the image but gun violence makes me feel sad'}, {'emotion': 'Sadness', 'intensity': '3', 'reason': 'I am beyond sad about what happened in Parkland, FL, but I like seeing these signs to bring about a sense of community.'}, {'emotion': 'Sadness', 'intensity': '3', 'reason': '.'}, {'emotion': 'Sadness', 'intensity': '3', 'reason': 'the …
825	HIAS, the Jewish Agency Criticized by the Shooting Suspect, Has a History of Aiding Refugees	anonymous-source/all_shooting_images_newest/100045.jpg	[{'emotion': 'Sadness', 'intensity': '4', 'reason': 'how many people do we have to lose before people change'}, {'emotion': 'Sadness', 'intensity': '3', 'reason': "I'm very saddened about the number of people who lost their lives due to shootings."}, {'emotion': 'Sadness', 'intensity': '3', 'reason': '.'}, {'emotion': 'Sadness', 'intensity': '4', 'reason': 'the loss, and the child and man'}, {'em…
827	Companies develop bulletproof clothing to protect against shootings	anonymous-source/all_shooting_images_newest/10506.jpg	[{'emotion': 'Disgust', 'intensity': '4', 'reason': "why would you ever practice shooting a target that looks real (unless you're in the military)"}, {'emotion': 'Fear', 'intensity': '3', 'reason': 'I know a lot of these dummies are used for police officers when training, but it is scary that anyone could practice on shooting.'}, {'emotion': 'Sadness', 'intensity': '3', 'reason': '.'}, {'emotion'…
829	BlackRock and Vanguard fought for gun changes yet rubber stamped Sturm Ruger's board	anonymous-source/all_shooting_images_newest/163.jpg	[{'emotion': 'Disgust', 'intensity': '3', 'reason': "guns shouldn't be romanticized or casually sold and positively marketed. "}, {'emotion': 'Fear', 'intensity': '5', 'reason': "It's scary that in some countries, anyone can buy that gun."}, {'emotion': 'Sadness', 'intensity': '3', 'reason': '.'}, {'emotion': 'Fear', 'intensity': '3', 'reason': 'guns'}, {'emotion': 'Fear', 'intensity': '3', 'reas…
833	Gun Maker Remington Plans to File for Bankruptcy Protection	anonymous-source/all_shooting_images_newest/10834.jpg	[{'emotion': 'Disgust', 'intensity': '3', 'reason': 'guns shouldn\'t be romanticized (this is "artsy")'}, {'emotion': 'Fear', 'intensity': '5', 'reason': 'again, it is very scary that anyone could own this gun and use it without a license.'}, {'emotion': 'Sadness', 'intensity': '3', 'reason': '.'}, {'emotion': 'Fear', 'intensity': '2', 'reason': 'looks like a shooting gun used'}, {'emotion': 'Awe…
835	Muslim Americans raise more than $200,000 for those affected by Pittsburgh synagogue shooting	anonymous-source/all_shooting_images_newest/100051.jpg	[{'emotion': 'Sadness', 'intensity': '3', 'reason': 'non white people are more of a target for gun violence '}, {'emotion': 'Sadness', 'intensity': '4', 'reason': "It's sad that people of specific religions and cultures are judged and disliked due to shootings and trauma caused by people of those same psychographics."}, {'emotion': 'Sadness', 'intensity': '3', 'reason': '.'}, {'emotion': 'Sadness…
838	Doctors sharing bloody photos after being told by NRA to 'stay in their lane'	anonymous-source/all_shooting_images_newest/110421.jpg	[{'emotion': 'Sadness', 'intensity': '3', 'reason': "I assume he's been operating on a gun shot victim which is disheartening "}, {'emotion': 'Sadness', 'intensity': '4', 'reason': 'This graphic image leads me to feel scared because of the potential of mass shootings.'}, {'emotion': 'Sadness', 'intensity': '3', 'reason': '.'}, {'emotion': 'Fear', 'intensity': '4', 'reason': 'blood'}, {'emotion': …
843	Why Was the State Department Ever Involved With the Debate Over 3D-Printed Guns?	anonymous-source/all_shooting_images_newest/352.jpg	[{'emotion': 'Fear', 'intensity': '3', 'reason': 'more guns will be produced'}, {'emotion': 'Fear', 'intensity': '3', 'reason': 'It scares me to see a 3D printed weapon. '}, {'emotion': 'Anger', 'intensity': '3', 'reason': 'scared to see this gun as it looks like 3D printing '}, {'emotion': 'Awe', 'intensity': '3', 'reason': 'N/A'}, {'emotion': 'Awe', 'intensity': '1', 'reason': 'I want to know m…
846	How mass shooters practice their hate online	anonymous-source/all_shooting_images_newest/100402.jpg	[{'emotion': 'Fear', 'intensity': '3', 'reason': 'the men seem to be a shooter'}, {'emotion': 'Fear', 'intensity': '3', 'reason': 'I fear something bad happened. '}, {'emotion': 'Fear', 'intensity': '3', 'reason': 'scared to hear about what has happened '}, {'emotion': 'Awe', 'intensity': '3', 'reason': 'N/A'}, {'emotion': 'Sadness', 'intensity': '1', 'reason': 'I do not know this scenario.'}, {'…
856	Florida city official charged with murder after state rejects 'stand your ground' shooting of suspected thief	anonymous-source/all_shooting_images_newest/100432.jpg	[{'emotion': 'Fear', 'intensity': '3', 'reason': 'gun is causing threat and danger to people'}, {'emotion': 'Fear', 'intensity': '3', 'reason': 'I am scared for what is happening. '}, {'emotion': 'Fear', 'intensity': '3', 'reason': 'I am scared to look at this photo, someone clearly got injured '}, {'emotion': 'Fear', 'intensity': '3', 'reason': 'N/A'}, {'emotion': 'Fear', 'intensity': '3', 'reas…
858	Mom with 'gut feeling' stops school shooter before planned attack	anonymous-source/all_shooting_images_newest/100374.jpg	[{'emotion': 'Contentment', 'intensity': '3', 'reason': '.'}, {'emotion': 'Contentment', 'intensity': '3', 'reason': 'I am glad to see them happy'}, {'emotion': 'Awe', 'intensity': '4', 'reason': 'cute family photo '}, {'emotion': 'Contentment', 'intensity': '3', 'reason': 'N/A'}, {'emotion': 'Contentment', 'intensity': '1', 'reason': 'this is a cute family but I do not know how it relates to gun…
860	Somber tributes, dimmed lights on Vegas shooting anniversary	anonymous-source/all_shooting_images_newest/100435.jpg	[{'emotion': 'Sadness', 'intensity': '2', 'reason': 'In the context, this feels like the tragic aftermath of a violent event where those who were affected are still coming to terms with what just happened.'}, {'emotion': 'Sadness', 'intensity': '3', 'reason': 'this girl seems to be the same age as me and seeing her witnessing a crime scene and just sitting there looking traumatized makes me feel …
863	Carrying a gun is a privilege regardless of whether you're a civilian or a police officer - Chicago Tribune	anonymous-source/all_shooting_images_newest/110460.jpg	[{'emotion': 'Fear', 'intensity': '1', 'reason': 'general associations with police gun violence.'}, {'emotion': 'Fear', 'intensity': '3', 'reason': "this image just reminds me of George Floyd's case from the middle of nowhere. "}, {'emotion': 'Fear', 'intensity': '1', 'reason': 'not sure what it is'}, {'emotion': 'Fear', 'intensity': '2', 'reason': 'i am hoping that whoever is carrying that gun u…
865	Generation Z reported the most mental health problems, and gun violence is the biggest stressor	anonymous-source/all_shooting_images_newest/100017.jpg	[{'emotion': 'Sadness', 'intensity': '1', 'reason': 'sympathy for the children who worry about the possibility of gun violence in their lives.'}, {'emotion': 'Contentment', 'intensity': '3', 'reason': 'just by looking at their facial expressions, they have so many more to say beyond the printed words "stop gun violence." '}, {'emotion': 'Contentment', 'intensity': '5', 'reason': 'agree with the i…
866	Grief and Self-Doubt Follow Shooting at Trenton Arts Festival	anonymous-source/all_shooting_images_newest/10450.jpg	[{'emotion': 'Fear', 'intensity': '1', 'reason': 'implies the proximity of possible violent events to our daily lives and gathering spaces.'}, {'emotion': 'Fear', 'intensity': '3', 'reason': "this image just gives me the feel of crime scenes is so close to everyone, and we can't even spot the potential violence that might happen."}, {'emotion': 'Sadness', 'intensity': '5', 'reason': 'feel like a …
869	Woman Who Reported Racist Facebook Message May Have Prevented a School Shooting	anonymous-source/all_shooting_images_newest/100213.jpg	[{'emotion': 'Fear', 'intensity': '1', 'reason': 'looking into the eyes of what is assumed to be a perpetrator of gun violence.'}, {'emotion': 'Disgust', 'intensity': '3', 'reason': 'I remember this dude from the sample of sexual harassment. He is a racist, sexual offender, and a potential murderer.'}, {'emotion': 'Fear', 'intensity': '3', 'reason': 'feel it is related to a gun violence '}, {'emo…
871	Morning Spin: Democrats still looking votes to override Rauner's gun store licensing veto	anonymous-source/all_shooting_images_newest/10648.jpg	[{'emotion': 'Contentment', 'intensity': '1', 'reason': "I do not know any of the individuals pictured; not enough context to understand the image's implications"}, {'emotion': 'Excitement', 'intensity': '3', 'reason': "again, I don't know what's going on, but I would guess they are striving for the repealing of the second amendment."}, {'emotion': 'Contentment', 'intensity': '3', 'reason': 'Thei…
873	I fled anti-Semitism in the Soviet Union: We must tackle lax gun laws as well as hate and bigotry	anonymous-source/all_shooting_images_newest/110484.jpg	[{'emotion': 'Sadness', 'intensity': '1', 'reason': 'the possibility of experiencing gun violence in a safe space of community and religious worship.'}, {'emotion': 'Fear', 'intensity': '3', 'reason': 'the gun the police officer is carrying is HUGE. i wonder how bad it could be if an active shooter owns it.'}, {'emotion': 'Fear', 'intensity': '3', 'reason': 'the policeman and gun makes me feel af…
876	How Columbine changed the way police respond to mass shootings	anonymous-source/all_shooting_images_newest/10502.jpg	[{'emotion': 'Sadness', 'intensity': '1', 'reason': 'the possibility of experiencing gun violence in a space meant for education and community.'}, {'emotion': 'Fear', 'intensity': '3', 'reason': "just imagine I'm one of those I will be freaking out."}, {'emotion': 'Fear', 'intensity': '3', 'reason': 'feel it is related to a gun violence'}, {'emotion': 'Sadness', 'intensity': '5', 'reason': 'it lo…
877	NRA TV Airs Photo of Thomas The Tank Engine In KKK Hood In 'Ethnic Diversity' Segment	anonymous-source/all_shooting_images_newest/90366.jpg	[{'emotion': 'Contentment', 'intensity': '1', 'reason': 'I do not know the individual pictured nor the message they are advocating for.'}, {'emotion': 'Contentment', 'intensity': '3', 'reason': 'she talked about the bias toward boys in the status quo. Her talk really got me thinking.'}, {'emotion': 'Contentment', 'intensity': '3', 'reason': 'feel like a debate about gun is going on'}, {'emotion':…
878	Miami Students Take Aim At Gun Violence At Do The Right Thing Event	anonymous-source/all_shooting_images_newest/90313.jpg	[{'emotion': 'Amusement', 'intensity': '2', 'reason': 'Seems like an inadequate and silly measure to take against potential gun violence in schools; if this school has already experienced such violence in the past it almost seems like the rhyme is making a mockery of the life-threatening danger that its students had to face.'}, {'emotion': 'Contentment', 'intensity': '3', 'reason': 'great proposa…
879	White man pulls gun in confrontation with black Florida A&M students	anonymous-source/all_shooting_images_newest/90451.jpg	[{'emotion': 'Fear', 'intensity': '2', 'reason': 'the mans facial expression and body language makes me feel very uneasy.'}, {'emotion': 'Fear', 'intensity': '3', 'reason': 'I feel gun violence could happen anywhere.'}, {'emotion': 'Fear', 'intensity': '3', 'reason': 'seems like an image of a conflict'}, {'emotion': 'Fear', 'intensity': '4', 'reason': "the idea of being trapped in an elevator and…
883	Pittsburgh shooting: 11 dead in synagogue attack with suspect Rob Bowers to face federal hate crime charges	anonymous-source/all_shooting_images_newest/100322.jpg	[{'emotion': 'Fear', 'intensity': '2', 'reason': 'I feel fear as the police are very heavily armed and feel uneasy as there must have been a very serious shooting.'}, {'emotion': 'Fear', 'intensity': '2', 'reason': 'I do not have many feelings.'}, {'emotion': 'Fear', 'intensity': '4', 'reason': 'three armed men'}, {'emotion': 'Fear', 'intensity': '2', 'reason': 'armed officers can make the commun…
884	Boulder, Colorado, unanimously votes to ban assault weapons, high-capacity magazines	anonymous-source/all_shooting_images_newest/10496.jpg	[{'emotion': 'Amusement', 'intensity': '1', 'reason': 'I feel amused and indifferent as this is simply an image of a man in a gunstore. '}, {'emotion': 'Fear', 'intensity': '3', 'reason': 'They look professional.'}, {'emotion': 'Fear', 'intensity': '3', 'reason': 'a person is using a gun'}, {'emotion': 'Fear', 'intensity': '5', 'reason': "he looks like he knows what he's doing, I do not know how …
886	We must condemn hatred, curb gun violence to reclaim our country	anonymous-source/all_shooting_images_newest/110360.jpg	[{'emotion': 'Sadness', 'intensity': '4', 'reason': 'As a Canadian, this image reminds of the horrendous Nova Scotia shooting and makes me feel very sad. However, I also feel anger at the Trudeau government as they used the shooting as an excuse to ban most guns in Canada.'}, {'emotion': 'Awe', 'intensity': '5', 'reason': 'I feel very sad because it seems like he is honoring people who died due t…
888	Jenelle Evans' Ex Seeks Full Custody After She Pulls Gun in Front of Son During Road Rage Incident	anonymous-source/all_shooting_images_newest/393.jpg	[{'emotion': 'Amusement', 'intensity': '1', 'reason': 'this image seems like a generic photo of 2 people walking, it is hard to relate it to gun violence and feel emotions.'}, {'emotion': 'Sadness', 'intensity': '3', 'reason': 'They look serious. '}, {'emotion': 'Sadness', 'intensity': '3', 'reason': 'seems like a picture of a mother and a son'}, {'emotion': 'Contentment', 'intensity': '1', 'reas…
889	Woman who reported racist Facebook message may have stopped a school shooting, police say	anonymous-source/all_shooting_images_newest/100019.jpg	[{'emotion': 'Fear', 'intensity': '4', 'reason': "This mugshot makes me feel very uneasy as the man's facial expression is fearsome."}, {'emotion': 'Fear', 'intensity': '4', 'reason': 'This photo looks like it was taken in a police station.'}, {'emotion': 'Fear', 'intensity': '3', 'reason': 'seems like a picture of criminal'}, {'emotion': 'Disgust', 'intensity': '5', 'reason': "the mugshot trigge…
890	A year after shooting, Vegas voters see strengthened community	anonymous-source/all_shooting_images_newest/90456.jpg	[{'emotion': 'Amusement', 'intensity': '2', 'reason': 'It is amusing to see a discussion on gun violence with people sitting so formally with glasses of white wine. I am curious to see what they have to say.'}, {'emotion': 'Amusement', 'intensity': '3', 'reason': 'This photo looks like a forum meeting. They look official.'}, {'emotion': 'Excitement', 'intensity': '3', 'reason': 'people are discus…
894	Investors pressure gun industry but there are limits	anonymous-source/all_shooting_images_newest/10593.jpg	[{'emotion': 'Amusement', 'intensity': '1', 'reason': "I felt almost no emotion at this image, as it's simply a generic image if a firearms store."}, {'emotion': 'Fear', 'intensity': '3', 'reason': 'They are selling guns.'}, {'emotion': 'Fear', 'intensity': '3', 'reason': 'many guns in the image'}, {'emotion': 'Fear', 'intensity': '4', 'reason': 'there are so many guns, it looks so easy to pick o…
895	Congress wonders if this time will be different for gun control	anonymous-source/all_shooting_images_newest/10821.jpg	[{'emotion': 'Anger', 'intensity': '4', 'reason': "While I understand the people's cause, I felt angered by this poster as it is a very stupid call. Many parents with kids own guns, and they certainly love their kids more than their firearms. Parents ditching their guns does not mean shootings will happen less."}, {'emotion': 'Contentment', 'intensity': '4', 'reason': 'They appear to be unconcern…
896	Carpenter erects wooden crosses in honor of shooting rampage victims	anonymous-source/all_shooting_images_newest/110405.jpg	[{'emotion': 'Sadness', 'intensity': '3', 'reason': 'It is very sad to see the memorial of a shooting, however, I am content as people have come to honor them.'}, {'emotion': 'Sadness', 'intensity': '5', 'reason': 'I feel sad for the people who have died because of gun violence.'}, {'emotion': 'Sadness', 'intensity': '4', 'reason': 'people are mourning the victims'}, {'emotion': 'Sadness', 'inten…
899	I think I'm going to kill the president,' Utah man allegedly told police after 6 guns found in car: reports	anonymous-source/all_shooting_images_newest/90303.jpg	[{'emotion': 'Fear', 'intensity': '4', 'reason': 'this is very scary to think about and I am upset to hear that this many wanted to kill he president and had guns in his car.'}, {'emotion': 'Disgust', 'intensity': '1', 'reason': 'this guy is gross'}, {'emotion': 'Fear', 'intensity': '3', 'reason': 'Everything about gun violence makes me nervous'}, {'emotion': 'Fear', 'intensity': '3', 'reason': '…
902	Support for stricter gun laws dips months after Parkland: poll	anonymous-source/all_shooting_images_newest/100258.jpg	[{'emotion': 'Sadness', 'intensity': '4', 'reason': 'sad to see that no one is caring about gun controls '}, {'emotion': 'Sadness', 'intensity': '4', 'reason': 'the parkland shooting was sad'}, {'emotion': 'Fear', 'intensity': '3', 'reason': 'Everything about gun violence makes me nervous'}, {'emotion': 'Fear', 'intensity': '4', 'reason': 'sad to hear about what is happening and scared '}, {'emot…
905	D.C. man arrested on gun charge after relatives alert police to his alleged white nationalist outbursts	anonymous-source/all_shooting_images_newest/110313.jpg	[{'emotion': 'Sadness', 'intensity': '4', 'reason': 'sad that a man was arrested but it is also scary and upsetting. '}, {'emotion': 'Sadness', 'intensity': '4', 'reason': 'the pittsburg hsooting was sad'}, {'emotion': 'Fear', 'intensity': '3', 'reason': 'Everything about gun violence makes me nervous'}, {'emotion': 'Awe', 'intensity': '4', 'reason': 'not sure how to feel about this as I have mix…
907	EA Sports cancels remaining 'Madden' qualifiers in wake of deadly Jacksonville shooting	anonymous-source/all_shooting_images_newest/385.jpg	[{'emotion': 'Sadness', 'intensity': '4', 'reason': 'heart broken to hear about a shooting and the death of someone '}, {'emotion': 'Sadness', 'intensity': '3', 'reason': 'this shooting was sad'}, {'emotion': 'Fear', 'intensity': '3', 'reason': 'Everything about gun violence makes me nervous'}, {'emotion': 'Contentment', 'intensity': '3', 'reason': "I don't have any strong emotions towards this p…
908	White man takes out gun to stop black students from entering apartment building	anonymous-source/all_shooting_images_newest/90385.jpg	[{'emotion': 'Disgust', 'intensity': '4', 'reason': 'I am disgusted about the fact that this man held a gun to a black boy and did not let him into the school. '}, {'emotion': 'Anger', 'intensity': '1', 'reason': 'idk who this is'}, {'emotion': 'Fear', 'intensity': '3', 'reason': 'Everything about gun violence makes me nervous'}, {'emotion': 'Sadness', 'intensity': '4', 'reason': 'sad and scared …
909	1 year after Vegas shooting, survivors describe 'new normal'	anonymous-source/all_shooting_images_newest/90409.jpg	[{'emotion': 'Sadness', 'intensity': '4', 'reason': 'this is emotional as she survived a shooting but she is sharing her story which is very inspiring and emotional '}, {'emotion': 'Sadness', 'intensity': '2', 'reason': 'her eye freaks me out'}, {'emotion': 'Fear', 'intensity': '3', 'reason': 'Everything about gun violence makes me nervous'}, {'emotion': 'Contentment', 'intensity': '3', 'reason':…
912	Use your voice': Celebrities push for voting, gun reform after Pittsburgh synagogue shooting	anonymous-source/all_shooting_images_newest/100321.jpg	[{'emotion': 'Awe', 'intensity': '4', 'reason': 'I have mixed emotions about this and am happy that celebrities are doing something to stop shootings, but how much of a difference can they really make '}, {'emotion': 'Sadness', 'intensity': '3', 'reason': 'looks like something bad happened.'}, {'emotion': 'Fear', 'intensity': '3', 'reason': 'Everything about gun violence makes me nervous'}, {'emo…
913	Cuomo bill would allow teachers to ask judge to take guns from students	anonymous-source/all_shooting_images_newest/10474.jpg	[{'emotion': 'Fear', 'intensity': '4', 'reason': 'scared to see all of these guns in one photo '}, {'emotion': 'Sadness', 'intensity': '3', 'reason': 'its too easy to buy guns in this country'}, {'emotion': 'Fear', 'intensity': '3', 'reason': 'Everything about gun violence makes me nervous'}, {'emotion': 'Fear', 'intensity': '4', 'reason': 'all of the guns in this photo scare me '}, {'emotion': '…
914	Polls after the Florida high school shooting show mixed views on gun reform	anonymous-source/all_shooting_images_newest/10804.jpg	[{'emotion': 'Sadness', 'intensity': '4', 'reason': 'everyone should want to stop gun violence '}, {'emotion': 'Excitement', 'intensity': '1', 'reason': 'there is hope for the future'}, {'emotion': 'Fear', 'intensity': '3', 'reason': 'Everything about gun violence makes me nervous'}, {'emotion': 'Excitement', 'intensity': '4', 'reason': 'proud and happy to see people coming together to fight for …
917	Muslim man arrested at New Mexico compound allegedly trained children to commit school shootings	anonymous-source/all_shooting_images_newest/387.jpg	[{'emotion': 'Disgust', 'intensity': '4', 'reason': 'I am disgusted and upset to hear about the fact that a man would force children into committing a shooting. '}, {'emotion': 'Sadness', 'intensity': '4', 'reason': 'poverty is sad'}, {'emotion': 'Fear', 'intensity': '3', 'reason': 'Everything about gun violence makes me nervous'}, {'emotion': 'Sadness', 'intensity': '4', 'reason': 'this photo ma…
922	Bank of America to stop lending to makers of 'military-style firearms'	anonymous-source/all_shooting_images_newest/10485.jpg	[{'emotion': 'Fear', 'intensity': '3', 'reason': 'the gun looks like those depicted in media regarding school shootings'}, {'emotion': 'Fear', 'intensity': '2', 'reason': 'guns carried by antisocial persons can be dangerous'}, {'emotion': 'Fear', 'intensity': '3', 'reason': 'the context of gun violence makes me wonder if this gun was used in a shooting.'}, {'emotion': 'Fear', 'intensity': '3', 'r…
924	Stunned by a surge in mass shootings, California lawmakers send nine gun-control bills to the governor	anonymous-source/all_shooting_images_newest/90446.jpg	[{'emotion': 'Sadness', 'intensity': '5', 'reason': 'that could have easily been any other high school, including mine, which i was at not too long ago and do have friends at now'}, {'emotion': 'Sadness', 'intensity': '4', 'reason': "seems some students died in gun violence. That's too sad"}, {'emotion': 'Sadness', 'intensity': '5', 'reason': 'this is in memoriam of the shooting that happened at …
927	Enough is enough': NRA's criticism spurs physicians to speak out on gun violence	anonymous-source/all_shooting_images_newest/110303.jpg	[{'emotion': 'Disgust', 'intensity': '3', 'reason': 'blood makes me feel sick, and knowing this blood is likely consequence of gun violence makes that feeling worse'}, {'emotion': 'Fear', 'intensity': '3', 'reason': 'her legs are injuried and seem dangerous'}, {'emotion': 'Fear', 'intensity': '5', 'reason': 'this is such a visceral image, and seeing the bloodstained pants makes me feel immense sy…
928	Texas governor's campaign website drops shotgun voucher giveaway after school shooting	anonymous-source/all_shooting_images_newest/10158.jpg	[{'emotion': 'Amusement', 'intensity': '3', 'reason': 'the setting of type of gun pictured make this image feel more recreational in a hunting environment. while still dealing with guns, hunting, from my experience, is highly regulated and actually rather safe in comparison to other gun activities.'}, {'emotion': 'Amusement', 'intensity': '2', 'reason': 'i guess he is hunting with his gun'}, {'em…
929	Trump visits Florida shooting survivors, FBI admits it missed tip	anonymous-source/all_shooting_images_newest/10170.jpg	[{'emotion': 'Contentment', 'intensity': '1', 'reason': 'i have little to no opinion on Trump as a person or politician, but his greeting with doctors is at least a little respectable'}, {'emotion': 'Anger', 'intensity': '2', 'reason': 'hey i dont think president trump did a lot positive for gun control'}, {'emotion': 'Anger', 'intensity': '4', 'reason': "of my previous knowledge of Trump's polic…
932	Big banks take a stand against the gun industry	anonymous-source/all_shooting_images_newest/10589.jpg	[{'emotion': 'Fear', 'intensity': '3', 'reason': 'the gun looks like those depicted in media regarding school shootings'}, {'emotion': 'Fear', 'intensity': '2', 'reason': 'guns carried by antisocial persons can be dangerous'}, {'emotion': 'Fear', 'intensity': '4', 'reason': 'the image of a gun when related to gun violence specifically is worrying.'}, {'emotion': 'Fear', 'intensity': '3', 'reason'…
933	These Students Were Told They Couldn't Come Back to School for Protesting Gun Violence	anonymous-source/all_shooting_images_newest/10186.jpg	[{'emotion': 'Sadness', 'intensity': '3', 'reason': 'the voices depicted in the image are so young, and to be a part of such an important movement against gun violence is moving'}, {'emotion': 'Excitement', 'intensity': '4', 'reason': 'i strongly support them defending for lives especially children in schools'}, {'emotion': 'Awe', 'intensity': '4', 'reason': 'I am proud of these students publicly…
934	Memorial in downtown Las Vegas honors victims of October shooting rampage	anonymous-source/all_shooting_images_newest/90459.jpg	[{'emotion': 'Awe', 'intensity': '3', 'reason': 'the artwork looks like it would have a powerful, moving story behind it'}, {'emotion': 'Sadness', 'intensity': '2', 'reason': 'not sure but are they victims of gun violence? if so thats a lot of sad'}, {'emotion': 'Contentment', 'intensity': '1', 'reason': "I'm not sure what is happening in the picture."}, {'emotion': 'Sadness', 'intensity': '3', '…
935	Michigan School District Installed Gunshot Sensor Detection System	anonymous-source/all_shooting_images_newest/90307.jpg	[{'emotion': 'Excitement', 'intensity': '3', 'reason': 'the framing/shadows in the image convey a sense of hopefulness for this country yet'}, {'emotion': 'Sadness', 'intensity': '2', 'reason': 'theres still a long way to go to control guns nationwide'}, {'emotion': 'Sadness', 'intensity': '3', 'reason': "this likely relates to the government's stance on gun ownership."}, {'emotion': 'Anger', 'in…
938	Gunman casually bought water moments before massacre that wounded Gabrielle Giffords, new FBI video shows	anonymous-source/all_shooting_images_newest/10357.jpg	[{'emotion': 'Contentment', 'intensity': '1', 'reason': 'I see nothing violent in the image, and nothing seems to be out of the ordinary.'}, {'emotion': 'Fear', 'intensity': '4', 'reason': 'scared to see what is happening at the cashier and if anyone was in danger '}, {'emotion': 'Contentment', 'intensity': '3', 'reason': 'I am not entirely sure what is being depicted here...'}, {'emotion': 'Fear…
942	Groups pushing gun control target California Republican with new ad	anonymous-source/all_shooting_images_newest/10331.jpg	[{'emotion': 'Fear', 'intensity': '4', 'reason': 'There are scary objects in the image. The scene depicted also seems to be very dangerous which makes me afraid, and a little disgusted that we end up in these situations.'}, {'emotion': 'Sadness', 'intensity': '4', 'reason': 'scared to see what is happening '}, {'emotion': 'Fear', 'intensity': '5', 'reason': 'The image of guns is very scary.'}, {'…
943	ATF emails reveal pressure to address bump stocks hours after Vegas shooting	anonymous-source/all_shooting_images_newest/100146.jpg	[{'emotion': 'Fear', 'intensity': '3', 'reason': 'These objects make me fearful. They also make me a bit disgusted that they are common in the world.'}, {'emotion': 'Fear', 'intensity': '4', 'reason': 'looks like this person is purchasing a gun and I am curious what the purchase is for and at the same time scared '}, {'emotion': 'Fear', 'intensity': '5', 'reason': 'The image of guns is so scary!'…
945	NY Dem politician urges off-duty cops to carry even during worship: Bring your firearm to church	anonymous-source/all_shooting_images_newest/100345.jpg	[{'emotion': 'Sadness', 'intensity': '2', 'reason': "The darkness of the image is both sad and somewhat scary. It seems to be depicting something sad, though it's hard to tell."}, {'emotion': 'Sadness', 'intensity': '4', 'reason': 'this photo is very upsetting to look at as it is about peoples lives who have been taken. '}, {'emotion': 'Sadness', 'intensity': '5', 'reason': 'Nobody should die bec…
946	Former student accused of bringing replica gun into Oswego High School	anonymous-source/all_shooting_images_newest/287.jpg	[{'emotion': 'Contentment', 'intensity': '1', 'reason': 'The image seems quite harmless in most contexts.'}, {'emotion': 'Contentment', 'intensity': '2', 'reason': 'I do not have any strong emotions towards this photo '}, {'emotion': 'Sadness', 'intensity': '5', 'reason': 'The image of a school bus in relation to this topic is so sad - they are just kids.'}, {'emotion': 'Fear', 'intensity': '3', …
948	Florida school shooting suspect was investigated by state after self-harming	anonymous-source/all_shooting_images_newest/10395.jpg	[{'emotion': 'Sadness', 'intensity': '3', 'reason': "The image depicts something sad, reflecting something bigger in the word. It's somewhat disgusting that we have to get into a situation like this."}, {'emotion': 'Sadness', 'intensity': '4', 'reason': 'I am saddened to see this young boy in prison, but at the same time he has committed a crime that has injured many people. '}, {'emotion': 'Sadn…
949	Smith & Wesson revenue from long-gun sales fell 50 percent this year: report	anonymous-source/all_shooting_images_newest/200.jpg	[{'emotion': 'Fear', 'intensity': '4', 'reason': 'The objects in the image are very dangerous. It also makes me disgusted and angry that this scene is so common in the world. '}, {'emotion': 'Contentment', 'intensity': '3', 'reason': 'people are allowed to buy guns and own guns, but it is scary to know this. This picture also makes me wonder where this guy is from. '}, {'emotion': 'Disgust', 'int…
953	How mass shootings forced Donald Trump to make a pivotal choice over America s gun obsession	anonymous-source/all_shooting_images_newest/100173.jpg	[{'emotion': 'Fear', 'intensity': '2', 'reason': "The objects in the image are dangerous which makes me afraid. Although the objects are in a somewhat fantastical context, so the emotion isn't very potent."}, {'emotion': 'Fear', 'intensity': '3', 'reason': 'scared of this photo and the guns in it '}, {'emotion': 'Fear', 'intensity': '5', 'reason': 'I do not like guns, at all - they are scary.'}, …
955	Pittsburgh synagogue gunman said he wanted all Jews to die, criminal complaint says	anonymous-source/all_shooting_images_newest/100354.jpg	[{'emotion': 'Contentment', 'intensity': '1', 'reason': "It's not super clear what event the image depicts, but it seems generally good which makes me content, and perhaps sad."}, {'emotion': 'Contentment', 'intensity': '3', 'reason': "I don't know how to feel about this photo as there is not much content given, I am curious to know what the reasoning behind this photo is and at the same time it …
959	With Grief and Hope, Florida Students Take Gun Control Fight On the Road	anonymous-source/all_shooting_images_newest/10608.jpg	[{'emotion': 'Sadness', 'intensity': '1', 'reason': 'two loved ones are hugging each other, genuinely'}, {'emotion': 'Sadness', 'intensity': '3', 'reason': 'People might be mourning over their friends due to gun violence.'}, {'emotion': 'Sadness', 'intensity': '2', 'reason': 'I can relate to their feeling'}, {'emotion': 'Sadness', 'intensity': '2', 'reason': 'the hug is so touching'}, {'emotion':…
962	Shootings Thrust Gun Control Into Campaign Ads	anonymous-source/all_shooting_images_newest/90226.jpg	[{'emotion': 'Excitement', 'intensity': '4', 'reason': 'I want to know what happened'}, {'emotion': 'Fear', 'intensity': '5', 'reason': 'They might be having a meeting around gun violence and how to deal with guns.'}, {'emotion': 'Awe', 'intensity': '4', 'reason': 'They are protecting us'}, {'emotion': 'Fear', 'intensity': '3', 'reason': 'I think they are doing a mission but they took the guns.'}…
963	Senators introduce bill to block terrorists from buying guns	anonymous-source/all_shooting_images_newest/10265.jpg	[{'emotion': 'Sadness', 'intensity': '4', 'reason': 'thinking about all the lives and people/living things could get hurt'}, {'emotion': 'Fear', 'intensity': '3', 'reason': 'People may still be proud of owning guns'}, {'emotion': 'Fear', 'intensity': '2', 'reason': 'they are dangerous'}, {'emotion': 'Amusement', 'intensity': '3', 'reason': 'the guns do not have any bullets'}, {'emotion': 'Disgust…
965	Rams to honor first responders and victims of wildfires, mass shooting at game Monday - Los Angeles Times	anonymous-source/all_shooting_images_newest/110099.jpg	[{'emotion': 'Awe', 'intensity': '4', 'reason': 'I respect those who are protecting our country'}, {'emotion': 'Fear', 'intensity': '3', 'reason': 'They might be having a meeting around gun violence and how to deal with guns.'}, {'emotion': 'Sadness', 'intensity': '2', 'reason': 'I can feel that they lost someone, and I can relate to them.'}, {'emotion': 'Sadness', 'intensity': '3', 'reason': 'Se…
968	Florida school failed Parkland shooter, report says	anonymous-source/all_shooting_images_newest/265.jpg	[{'emotion': 'Fear', 'intensity': '5', 'reason': 'he looks psychotic and his face has come up a few times'}, {'emotion': 'Sadness', 'intensity': '3', 'reason': 'That person does not feel shame for what he did to other people'}, {'emotion': 'Fear', 'intensity': '3', 'reason': 'he seems scary and sketchy'}, {'emotion': 'Fear', 'intensity': '3', 'reason': 'I think the man must be a criminal. '}, {'e…
975	Clippers, Bucks wear T-shirts in warmups that say Enough with names of Thousand Oaks shooting victims	anonymous-source/all_shooting_images_newest/110101.jpg	[{'emotion': 'Sadness', 'intensity': '3', 'reason': 'the lighting and them bowing their heads seem like they are respecting the lives of victims'}, {'emotion': 'Sadness', 'intensity': '3', 'reason': 'People might be mourning over their friends'}, {'emotion': 'Sadness', 'intensity': '3', 'reason': 'I can relate to them'}, {'emotion': 'Sadness', 'intensity': '3', 'reason': 'You can see from the pho…
978	Democrat drives to friend s home and reportedly shoots him over political disagreement on Facebook	anonymous-source/all_shooting_images_newest/149.jpg	[{'emotion': 'Disgust', 'intensity': '3', 'reason': 'they are ugly'}, {'emotion': 'Sadness', 'intensity': '3', 'reason': 'the guy looks super weird and it is sad that the shooting had a political basis. '}, {'emotion': 'Anger', 'intensity': '2', 'reason': 'the man is arrested for shooting at people'}, {'emotion': 'Disgust', 'intensity': '5', 'reason': 'the man is a criminal with such an ugly face…
979	Right and Left React to the Gun Control Debate After the Florida Shooting	anonymous-source/all_shooting_images_newest/10598.jpg	[{'emotion': 'Contentment', 'intensity': '3', 'reason': 'no context'}, {'emotion': 'Sadness', 'intensity': '3', 'reason': 'it looks like they are longing '}, {'emotion': 'Sadness', 'intensity': '2', 'reason': 'they are influenced by shots'}, {'emotion': 'Sadness', 'intensity': '4', 'reason': 'so many people are victims of gun violance'}, {'emotion': 'Sadness', 'intensity': '3', 'reason': "People …
985	Pittsburgh holds last funeral in synagogue shooting for oldest victim	anonymous-source/all_shooting_images_newest/110057.jpg	[{'emotion': 'Disgust', 'intensity': '3', 'reason': 'BLM'}, {'emotion': 'Sadness', 'intensity': '4', 'reason': 'it appears as a shooting was based on anti-semitism '}, {'emotion': 'Sadness', 'intensity': '3', 'reason': "she is mourning for the dead and that's sad"}, {'emotion': 'Sadness', 'intensity': '5', 'reason': 'I feel so sorry for people dead of gun violence.'}, {'emotion': 'Sadness', 'inte…
989	Opinion | Guns When Trump Can t Even Tweet	anonymous-source/all_shooting_images_newest/10602.jpg	[{'emotion': 'Awe', 'intensity': '3', 'reason': 'wish I was getting hugged'}, {'emotion': 'Sadness', 'intensity': '3', 'reason': 'they are mourning'}, {'emotion': 'Excitement', 'intensity': '3', 'reason': "they are reunited after a long time and that's happy"}, {'emotion': 'Sadness', 'intensity': '3', 'reason': 'people are getting hurt bu gun violence'}, {'emotion': 'Sadness', 'intensity': '3', '…
992	No one deserves to die over a video game': survivors recall chaos of Florida shooting	anonymous-source/all_shooting_images_newest/494.jpg	[{'emotion': 'Awe', 'intensity': '3', 'reason': 'Love seeing a black officer'}, {'emotion': 'Fear', 'intensity': '4', 'reason': 'the police are on the hunt '}, {'emotion': 'Awe', 'intensity': '2', 'reason': 'the police are doing their duty'}, {'emotion': 'Contentment', 'intensity': '4', 'reason': 'local police is working hard to protect civilians.'}, {'emotion': 'Fear', 'intensity': '1', 'reason'…
993	Military rushed to add 4,000 to gun ban list	anonymous-source/all_shooting_images_newest/10252.jpg	[{'emotion': 'Awe', 'intensity': '3', 'reason': 'that is the cleanest .45 I have ever seen'}, {'emotion': 'Fear', 'intensity': '4', 'reason': 'the guns looks scary and intense'}, {'emotion': 'Fear', 'intensity': '2', 'reason': 'guns can hurt lives easily'}, {'emotion': 'Fear', 'intensity': '3', 'reason': 'guns should not be sold that way.'}, {'emotion': 'Fear', 'intensity': '2', 'reason': 'I hope…
998	Retired firefighter convicted for firing shotgun at black teen who knocked on his door (video)	anonymous-source/all_shooting_images_newest/100339.jpg	[{'emotion': 'Fear', 'intensity': '4', 'reason': 'I am not sure who he is shooting but it looks like he is just shooting someone out in a neighborhood and that is scary knowing that anyone could have a gun and possibly do that in my neighborhood.'}, {'emotion': 'Sadness', 'intensity': '3', 'reason': 'The man appears to be shooting somebody.'}, {'emotion': 'Fear', 'intensity': '1', 'reason': "CCTV…
999	It s never going to be normal': California city in shock after gunman kills 12	anonymous-source/all_shooting_images_newest/110161.jpg	[{'emotion': 'Sadness', 'intensity': '4', 'reason': "Maybe they lost someone to gun violence and I couldn't imagine that happening to me and that makes me so sad."}, {'emotion': 'Sadness', 'intensity': '3', 'reason': 'The girl in the image is crying'}, {'emotion': 'Sadness', 'intensity': '5', 'reason': 'Sad things are happening.'}, {'emotion': 'Sadness', 'intensity': '5', 'reason': 'I can feel th…
1002	How 3-D printed guns are made and the growing security concerns they present	anonymous-source/all_shooting_images_newest/84.jpg	[{'emotion': 'Fear', 'intensity': '4', 'reason': 'I do not like seeing bullets and thinking of the harm they can do'}, {'emotion': 'Sadness', 'intensity': '3', 'reason': 'I see bullets in the image which makes me think of gun violence.'}, {'emotion': 'Fear', 'intensity': '2', 'reason': 'This toy gun can actually shoot those.'}, {'emotion': 'Fear', 'intensity': '3', 'reason': '3D gun have the same…
1003	From Barack Boom to Trump Slump: Demand Slows for AR-15-Style Guns	anonymous-source/all_shooting_images_newest/90436.jpg	[{'emotion': 'Disgust', 'intensity': '3', 'reason': "I do not like looking at guns, they scare me and shouldn't just be shopped for like clothes"}, {'emotion': 'Fear', 'intensity': '3', 'reason': 'Seeing so many long guns in one frame makes me feel fearful'}, {'emotion': 'Fear', 'intensity': '2', 'reason': 'So many guns still for sell.'}, {'emotion': 'Fear', 'intensity': '3', 'reason': 'Different…
1004	Parkland students urge Democrats to help end gun violence: We re prepared for the long haul	anonymous-source/all_shooting_images_newest/110056.jpg	[{'emotion': 'Awe', 'intensity': '4', 'reason': 'It is great seeing people come together to fight for a good cause'}, {'emotion': 'Excitement', 'intensity': '4', 'reason': 'the picture is full of youngsters who seem to be protesting in a very Positive and energetic way.'}, {'emotion': 'Amusement', 'intensity': '5', 'reason': 'They look positive and strong!'}, {'emotion': 'Excitement', 'intensity'…
1005	Florida video game contest shooting reignites gun rights debate	anonymous-source/all_shooting_images_newest/77.jpg	[{'emotion': 'Sadness', 'intensity': '4', 'reason': 'I feel sadness because someone may have been hurt by guns and I really hope they did not. '}, {'emotion': 'Sadness', 'intensity': '5', 'reason': 'Reminds me of the Jacksonville shooting massacre'}, {'emotion': 'Sadness', 'intensity': '2', 'reason': 'something bad must happened there.'}, {'emotion': 'Sadness', 'intensity': '3', 'reason': 'People…
1009	NYT editorial board: Trump, Congress must tackle gun control	anonymous-source/all_shooting_images_newest/110191.jpg	[{'emotion': 'Sadness', 'intensity': '3', 'reason': 'I see the fear in their eyes and that makes me so sad to see. '}, {'emotion': 'Sadness', 'intensity': '3', 'reason': 'people seem to be fearful even in the presence of the sheriff'}, {'emotion': 'Fear', 'intensity': '2', 'reason': 'Something happened and they are telling police something.'}, {'emotion': 'Fear', 'intensity': '4', 'reason': "They…
1012	Those Banned 3D-Printed Gun Files Are Now Available on Another Site. Are They Really Free Speech?	anonymous-source/all_shooting_images_newest/87.jpg	[{'emotion': 'Sadness', 'intensity': '3', 'reason': 'I do not like seeing guns and they make me so sad to see they are still being sold.'}, {'emotion': 'Fear', 'intensity': '3', 'reason': 'this is a 3 D printed gun'}, {'emotion': 'Awe', 'intensity': '2', 'reason': 'Looks not very important to me'}, {'emotion': 'Fear', 'intensity': '1', 'reason': 'No strong feeling'}, {'emotion': 'Amusement', 'int…
1013	Calif. governor signs bill raising age limit for purchase of long guns from 18 to 21	anonymous-source/all_shooting_images_newest/90461.jpg	[{'emotion': 'Anger', 'intensity': '3', 'reason': 'I do not think people should be able to just shop for guns and have us trust that they will use them for good purposes. I think it should be much more difficult to purchase a firearm .'}, {'emotion': 'Fear', 'intensity': '3', 'reason': 'there are so many people at the gun store.'}, {'emotion': 'Fear', 'intensity': '2', 'reason': 'people is buying…
1018	Police: Too soon to say if shooting was racial attack	anonymous-source/all_shooting_images_newest/100196.jpg	[{'emotion': 'Fear', 'intensity': '4', 'reason': 'This man looks like someone dangerous / threatening... also appears to be a mugshot'}, {'emotion': 'Disgust', 'intensity': '4', 'reason': 'Given the brief description, I immediately assumed the image was of the perpetrator. Then I realized the caption did not specify this, and that it could have been a victim, but then I looked harder and the imag…
1019	The Latest: Vegas shooting survivors form human chain	anonymous-source/all_shooting_images_newest/100381.jpg	[{'emotion': 'Sadness', 'intensity': '5', 'reason': 'Clearly these are victims of gun violence; experiencing a lot of grief'}, {'emotion': 'Sadness', 'intensity': '3', 'reason': 'My immediate reaction was they are at a memorial for a victim of gun violence. Then I noticed the white cowboy hat and American flag tattoo. I think this definitely triggered a bias in my perception, associating the hat …
1023	'Run, hide, fight': Cal State video shows how to survive active shooter	anonymous-source/all_shooting_images_newest/10809.jpg	[{'emotion': 'Fear', 'intensity': '5', 'reason': 'This is such a realistic and scary situation'}, {'emotion': 'Awe', 'intensity': '4', 'reason': "At first, I was excited, because I watch too many movies/TV where this would actually happen that the girl is about the save the school. But I know that it's likely unrealistic. Which again makes me fear her safety, but regardless I am in awe."}, {'emot…
1025	Trump said mental illness leads to gun violence. Here s why doctors disagree	anonymous-source/all_shooting_images_newest/10248.jpg	[{'emotion': 'Fear', 'intensity': '5', 'reason': 'Very ominous scene; clearly there was a violent scene here and police presence'}, {'emotion': 'Disgust', 'intensity': '5', 'reason': 'Those bikes are small. The picture appears to be of a school. Maybe middle school based on the size of the bikes. Whoever started the violence there is sick, children are absolutely defenseless. Assuming its an elem…
1027	South Park Season Premiere Dead Kids Is a Big Middle Finger at Apathy Over School Shootings	anonymous-source/all_shooting_images_newest/90189.jpg	[{'emotion': 'Sadness', 'intensity': '4', 'reason': "I'm unfamiliar which episode of South Park this is, but clearly they are having a family dinner and scared."}, {'emotion': 'Disgust', 'intensity': '3', 'reason': 'South Park from what I know is an inappropriate comedy show. I have never watched it but usually shows like this are not sensitive to such topics and mock such tragedies. They also dr…
1028	New Jersey mom helps thwart school shooting plot in Kentucky	anonymous-source/all_shooting_images_newest/100203.jpg	[{'emotion': 'Disgust', 'intensity': '5', 'reason': 'The man being able to purchase and wield such a large gun is horrible'}, {'emotion': 'Disgust', 'intensity': '5', 'reason': 'Thinking about people taking a selfie with an automatic weapon is disturbing. That it is something to "flex," or that they are planning something and documenting it. Even if they are just holding it as a joke, it\'s not f…
1029	Shooting at Pittsburgh synagogue widely condemned, deemed 'unconscionable'	anonymous-source/all_shooting_images_newest/100416.jpg	[{'emotion': 'Sadness', 'intensity': '5', 'reason': 'This appears to be a mother comforting her kids in the wake of a shooting. It leaves me absolutely terrified, and I feel so bad for the mother who is having to remain strong in the wake of such violence and terror.'}, {'emotion': 'Sadness', 'intensity': '5', 'reason': 'Seeing a woman embrace two younger daughters reminds me of my mom and my sis…
1031	A Republican Governor Shoots Himself in the Foot	anonymous-source/all_shooting_images_newest/90416.jpg	[{'emotion': 'Contentment', 'intensity': '3', 'reason': 'Not too sure what is going on here, but they look happy'}, {'emotion': 'Contentment', 'intensity': '4', 'reason': 'Being optimistic, I like to interpret this image as someone running for a campaign or involved in one working towards actions to prevent gun violence, and on a smaller level, I appreciate people starting the conversation and st…
1035	After Parkland, this survivor is fighting for gun control and against Islamophobia	anonymous-source/all_shooting_images_newest/10313.jpg	[{'emotion': 'Fear', 'intensity': '5', 'reason': 'Super realistic scenario, and I remember doing these parking lot drills in high school'}, {'emotion': 'Sadness', 'intensity': '5', 'reason': "These aren't kids at a school walk out. They are being escorted. This is terrifying and sickening that students have to face this at a place where they are supposed to be safe and learning, not interrogated.…
1039	Trump upends gun politics for now	anonymous-source/all_shooting_images_newest/10047.jpg	[{'emotion': 'Amusement', 'intensity': '1', 'reason': "Trump seems speechless and I have no idea what's happening"}, {'emotion': 'Disgust', 'intensity': '3', 'reason': "Trump generally makes me feel annoyed and disgusted because I don't agree with many of the things he says and does."}, {'emotion': 'Amusement', 'intensity': '3', 'reason': 'what he did'}, {'emotion': 'Amusement', 'intensity': '4',…
1040	John Cornyn: Raising age limit for rifles may not save lives	anonymous-source/all_shooting_images_newest/10844.jpg	[{'emotion': 'Fear', 'intensity': '1', 'reason': "The emotion of the man in the front make me feel there's something need to be worry about"}, {'emotion': 'Anger', 'intensity': '4', 'reason': "I don't like that the main people controlling the gun violence conversation are old cis white men who aren't the ones most damaged and hurt by gun violence."}, {'emotion': 'Fear', 'intensity': '3', 'reason'…
1042	8 States Are Suing the Trump Administration to Block 3D-Printed Guns	anonymous-source/all_shooting_images_newest/398.jpg	[{'emotion': 'Fear', 'intensity': '2', 'reason': 'The real gun make me afraid'}, {'emotion': 'Fear', 'intensity': '5', 'reason': 'pictures of guns makes me nervous and uncomfortable.'}, {'emotion': 'Fear', 'intensity': '3', 'reason': "He doesn't look like he can handle this"}, {'emotion': 'Fear', 'intensity': '1', 'reason': 'I have seen so many images of assault guns in the hands of ordinary citi…
1044	Texas leaders want more screening and more guns to prevent more shootings	anonymous-source/all_shooting_images_newest/10640.jpg	[{'emotion': 'Sadness', 'intensity': '3', 'reason': 'Loss of life makes me sad'}, {'emotion': 'Sadness', 'intensity': '2', 'reason': 'it took me a bit to realize that they were roses on the ground, probably mourning those lost to gun violence, and that makes me sad.'}, {'emotion': 'Sadness', 'intensity': '3', 'reason': 'many people died'}, {'emotion': 'Sadness', 'intensity': '5', 'reason': "If I …
1048	Dispute over 3D-printed guns raises many legal issues	anonymous-source/all_shooting_images_newest/131.jpg	[{'emotion': 'Fear', 'intensity': '1', 'reason': 'His face and the gun holding by him scared me'}, {'emotion': 'Fear', 'intensity': '5', 'reason': 'the guy looks intimidating and seeing guns makes me scared and nervous.'}, {'emotion': 'Fear', 'intensity': '3', 'reason': 'he looks not kind'}, {'emotion': 'Fear', 'intensity': '4', 'reason': 'that man looks like how I imagine a pro-gun advocate, so …
1050	With Gun Control Nearing a Dead End, G.O.P. Turns to School Safety	anonymous-source/all_shooting_images_newest/10850.jpg	[{'emotion': 'Sadness', 'intensity': '1', 'reason': "The photo of the young boy makes me guess there's something bad happen and makes me sad"}, {'emotion': 'Sadness', 'intensity': '1', 'reason': "I'm sad that gun violence is such a rampant issue that it needs to be talked about so much but I'm not really use what the above picture is trying to convey so I feel a mostly neutral response so this."}…
1052	3D-printed guns: Judge blocks release of blueprints for firearms	anonymous-source/all_shooting_images_newest/405.jpg	[{'emotion': 'Fear', 'intensity': '1', 'reason': 'Looks like a toy gun. But if it is a real gun it will make me scared'}, {'emotion': 'Fear', 'intensity': '5', 'reason': "I don't like seeing guns, I think it's dangerous and scary."}, {'emotion': 'Fear', 'intensity': '3', 'reason': 'do not touch it'}, {'emotion': 'Sadness', 'intensity': '3', 'reason': "again, i don't see the point of adding more g…
1054	Accused Gunman in Capital Gazette Shooting Left a Trail of Conflicts	anonymous-source/all_shooting_images_newest/10651.jpg	[{'emotion': 'Sadness', 'intensity': '1', 'reason': 'Guessing of losing of life, especially kids makes me sad'}, {'emotion': 'Sadness', 'intensity': '2', 'reason': 'I assume the flowers are for mourning the dead because of gun violence and that makes me feel bad for the ones impacted.'}, {'emotion': 'Amusement', 'intensity': '3', 'reason': 'looks peaceful'}, {'emotion': 'Sadness', 'intensity': '4…
1055	What House Democrats can do about guns - CNNPolitics	anonymous-source/all_shooting_images_newest/110050.jpg	[{'emotion': 'Fear', 'intensity': '1', 'reason': 'Seems like gun violence has already happened which makes me scared'}, {'emotion': 'Sadness', 'intensity': '2', 'reason': "it looks like they're investigating the site of gun violence and it's sad that there is so much uncertainty in that moment."}, {'emotion': 'Contentment', 'intensity': '3', 'reason': 'they are reliable'}, {'emotion': 'Fear', 'in…
1059	Pittsburgh synagogue shooting prompts wide outpouring of public support	anonymous-source/all_shooting_images_newest/100315.jpg	[{'emotion': 'Sadness', 'intensity': '3', 'reason': 'these people seem to be grieving and in pain, they have lost people'}, {'emotion': 'Sadness', 'intensity': '3', 'reason': 'they look like survivors.'}, {'emotion': 'Sadness', 'intensity': '2', 'reason': "People's hearts must be very sad, I people strengthen management to reduce the occurrence of tragedies."}, {'emotion': 'Excitement', 'intensit…
1067	Warriors coach fundraising for gun control Brady PAC	anonymous-source/all_shooting_images_newest/90128.jpg	[{'emotion': 'Contentment', 'intensity': '3', 'reason': 'steph curry!'}, {'emotion': 'Contentment', 'intensity': '3', 'reason': "I don't read anything."}, {'emotion': 'Awe', 'intensity': '2', 'reason': "People's management of guns should be better valued."}, {'emotion': 'Excitement', 'intensity': '3', 'reason': 'Excitement'}, {'emotion': 'Contentment', 'intensity': '5', 'reason': 'they are suppor…
1068	Jury sees video of white man who greeted lost black teen with shotgun	anonymous-source/all_shooting_images_newest/100189.jpg	[{'emotion': 'Fear', 'intensity': '3', 'reason': 'clearly a mugshot from someone who killed someone with a gun'}, {'emotion': 'Anger', 'intensity': '3', 'reason': 'He is a gun shooter.'}, {'emotion': 'Fear', 'intensity': '4', 'reason': 'I was terrified because I thought he was doing something inappropriate.'}, {'emotion': 'Excitement', 'intensity': '3', 'reason': 'Excitement'}, {'emotion': 'Fear'…
1069	Las Vegas shooting: One year later, hundreds of videos traumatize some survivors	anonymous-source/all_shooting_images_newest/100366.jpg	[{'emotion': 'Fear', 'intensity': '3', 'reason': "I've seen photos from the vegas shooting, it's horrifying"}, {'emotion': 'Anger', 'intensity': '3', 'reason': 'they are breaking some kind of rule'}, {'emotion': 'Fear', 'intensity': '4', 'reason': 'The excesses of people make me feel that things are being handled inappropriately.'}, {'emotion': 'Excitement', 'intensity': '3', 'reason': 'Excitemen…
1074	March For Our Lives founder leaves the gun control movement and expresses one big regret	anonymous-source/all_shooting_images_newest/90297.jpg	[{'emotion': 'Sadness', 'intensity': '3', 'reason': 'although these are MFOL people, the fact that they have been through so much and have gotten a public interview about it is upsetting to me'}, {'emotion': 'Excitement', 'intensity': '3', 'reason': 'They look happy.'}, {'emotion': 'Contentment', 'intensity': '2', 'reason': 'A more comprehensive occurrence could help manage firearms.'}, {'emotion…
1075	House Dems call for first Education Committee hearing on school shootings since Sandy Hook	anonymous-source/all_shooting_images_newest/10222.jpg	[{'emotion': 'Sadness', 'intensity': '3', 'reason': 'clearly these people are hurting'}, {'emotion': 'Anger', 'intensity': '3', 'reason': 'It is a school shooting.'}, {'emotion': 'Sadness', 'intensity': '4', 'reason': "It's a road to school and I think my heart is very scared. I am afraid of threatening the lives of students."}, {'emotion': 'Excitement', 'intensity': '3', 'reason': 'Excitement'},…
1083	The NRA Versus the Constitution	anonymous-source/all_shooting_images_newest/10361.jpg	[{'emotion': 'Disgust', 'intensity': '4', 'reason': 'people are actively trying to circumvent efforts to lower gun violence, both on the sellers and buyers front.'}, {'emotion': 'Fear', 'intensity': '4', 'reason': 'It is scary to imagine that people are carrying around concealed guns, because you never know when someone will pull it out on you'}, {'emotion': 'Fear', 'intensity': '3', 'reason': 'I…
1084	Teenagers stage 'lie-in' outside White House in support of Parkland shooting victims	anonymous-source/all_shooting_images_newest/10740.jpg	[{'emotion': 'Sadness', 'intensity': '4', 'reason': "it is quite sad to see kids needing to take part in an issue that shouldn't concern them at their age."}, {'emotion': 'Sadness', 'intensity': '4', 'reason': 'This is sad because the people are laying down to signify murder victims from mass shootings. It makes me sad that we must protest being killed by gun violence'}, {'emotion': 'Fear', 'inte…
1086	New NRA President Oliver North Suggests All Iranians Are Liars	anonymous-source/all_shooting_images_newest/10647.jpg	[{'emotion': 'Disgust', 'intensity': '2', 'reason': 'Sean Hannity is a right-wing news anchor well known for his Republican takes.'}, {'emotion': 'Sadness', 'intensity': '4', 'reason': 'It makes me tense to see politicians debate about gun control when it is a policy that is desperately needed'}, {'emotion': 'Fear', 'intensity': '3', 'reason': 'I do not understand what this message meant'}, {'emo…
1088	Arrest warrant issued for white man seen on video flashing gun at black college students	anonymous-source/all_shooting_images_newest/90206.jpg	[{'emotion': 'Fear', 'intensity': '1', 'reason': 'this seems to be a confrontation, and nowadays, it is not strange to see something like this escalate.'}, {'emotion': 'Fear', 'intensity': '4', 'reason': 'It seems as though the man is angry, and I am scared that he is about to shoot the man he is talking to'}, {'emotion': 'Anger', 'intensity': '3', 'reason': 'I do not understand what this message…
1089	Only 5 senators were in the room to hear Parkland shooting survivor's testimony on Kavanaugh	anonymous-source/all_shooting_images_newest/90231.jpg	[{'emotion': 'Amusement', 'intensity': '1', 'reason': 'it seems like this is a formal event, but she is dressed very casually.'}, {'emotion': 'Awe', 'intensity': '2', 'reason': 'I am assuming that this woman is speaking in favor of gun control. If so, I feel awe and admiration for her as her speech seems important. '}, {'emotion': 'Contentment', 'intensity': '3', 'reason': 'I do not understand wh…
1093	BlackRock, a Shareholder in Gun Makers, Ramps Up Pressure on Gun Industry	anonymous-source/all_shooting_images_newest/10383.jpg	[{'emotion': 'Fear', 'intensity': '1', 'reason': 'this seems to be a place where people can browse guns at their leisure.'}, {'emotion': 'Fear', 'intensity': '4', 'reason': 'These machines are lethal, and seeing them handled makes me nervous because i can imagine them killing someone'}, {'emotion': 'Fear', 'intensity': '3', 'reason': 'I do not understand what this message meant'}, {'emotion': 'Fe…
1094	School kids use #IfIDieInASchoolShooting to share thoughts on gun violence	anonymous-source/all_shooting_images_newest/10757.jpg	[{'emotion': 'Sadness', 'intensity': '4', 'reason': 'there is really no reason kids of such a young age should be exposed to the notion of gun violence.'}, {'emotion': 'Sadness', 'intensity': '5', 'reason': 'little kids should not have to confront the dark realities of gun violence like this. they should not have to live in fear.'}, {'emotion': 'Sadness', 'intensity': '3', 'reason': 'I do not und…
1095	Hundreds gather to honor Noel Sparks, killed in Thousand Oaks mass shooting	anonymous-source/all_shooting_images_newest/110263.jpg	[{'emotion': 'Sadness', 'intensity': '4', 'reason': 'this seems to be a memorial in commemoration of someone who has lost their life from gun violence.'}, {'emotion': 'Sadness', 'intensity': '5', 'reason': 'I am assuming that these are victims of gun violence. It makes me sad that so many lives were lost and also that this little boy has to experience tragedy at the hands of gun violence.'}, {'em…
1102	A Judge Has Blocked The Release Of 3D-Printed Gun Blueprints For Now	anonymous-source/all_shooting_images_newest/459.jpg	[{'emotion': 'Fear', 'intensity': '2', 'reason': "I'm afraid of the fact that people can make gun by 3D printer"}, {'emotion': 'Fear', 'intensity': '3', 'reason': 'Scary that you can just make these things. '}, {'emotion': 'Fear', 'intensity': '1', 'reason': 'There is still gun violence outside.'}, {'emotion': 'Sadness', 'intensity': '3', 'reason': 'guns are becoming to accessible'}, {'emotion': …
1104	Families, friends gather as more loved ones are laid to rest in wake of school shooting	anonymous-source/all_shooting_images_newest/10825.jpg	[{'emotion': 'Sadness', 'intensity': '3', 'reason': 'The losing of life make me sad'}, {'emotion': 'Sadness', 'intensity': '3', 'reason': 'So sad to see '}, {'emotion': 'Sadness', 'intensity': '1', 'reason': 'There is still gun violence outside.'}, {'emotion': 'Sadness', 'intensity': '5', 'reason': "we've lost too many people due to gun voilence"}, {'emotion': 'Sadness', 'intensity': '5', 'reason…
1106	Florida stopped doing gun permit checks for more than a year	anonymous-source/all_shooting_images_newest/10272.jpg	[{'emotion': 'Fear', 'intensity': '1', 'reason': 'Seems like the target in a gun pavilion'}, {'emotion': 'Fear', 'intensity': '3', 'reason': 'Scary'}, {'emotion': 'Fear', 'intensity': '1', 'reason': 'this is too scary. '}, {'emotion': 'Contentment', 'intensity': '3', 'reason': "this looks like shooting being done in a safe area- this I don't mind. need controlled spaces"}, {'emotion': 'Anger', 'i…
1112	Florida mass shootings embolden Democrats on gun control	anonymous-source/all_shooting_images_newest/477.jpg	[{'emotion': 'Fear', 'intensity': '1', 'reason': "I'm afraid of lots of real guns"}, {'emotion': 'Fear', 'intensity': '3', 'reason': 'Guns are scary'}, {'emotion': 'Fear', 'intensity': '1', 'reason': 'There is still gun violence outside.'}, {'emotion': 'Fear', 'intensity': '3', 'reason': "I don't like seeing guns"}, {'emotion': 'Fear', 'intensity': '4', 'reason': 'it seems like they are mailing o…
1114	Kansas man sentenced to life in prison for 2017 shooting that targeted Indian men	anonymous-source/all_shooting_images_newest/22.jpg	[{'emotion': 'Sadness', 'intensity': '3', 'reason': 'Facing the lose of life directly make me sad'}, {'emotion': 'Sadness', 'intensity': '3', 'reason': 'So sad to see someones life get taken'}, {'emotion': 'Sadness', 'intensity': '1', 'reason': 'There is still gun violence outside.'}, {'emotion': 'Sadness', 'intensity': '4', 'reason': "people didn't need to die"}, {'emotion': 'Sadness', 'intensit…
1115	Probe: Mercy Hospital gunman was 'disliked classmate'at fire academy, described as presenting himself in'perverted' way	anonymous-source/all_shooting_images_newest/110226.jpg	[{'emotion': 'Sadness', 'intensity': '1', 'reason': 'Seems like the shooting just happened, the fact that someone got injured make me sad'}, {'emotion': 'Sadness', 'intensity': '3', 'reason': 'Something bad probably happened so it makes me sad'}, {'emotion': 'Sadness', 'intensity': '1', 'reason': 'There is still gun violence outside.'}, {'emotion': 'Sadness', 'intensity': '4', 'reason': 'it looks…
1116	Amy Schumer Tells Politicians Against Gun Reform: 'You Are Killing Children'	anonymous-source/all_shooting_images_newest/10273.jpg	[{'emotion': 'Awe', 'intensity': '1', 'reason': 'Seems like a speech, I have no idea about what she is talking about'}, {'emotion': 'Contentment', 'intensity': '3', 'reason': 'Content that someone with a platform is speaking out about gun violence'}, {'emotion': 'Excitement', 'intensity': '1', 'reason': 'it seems that she is fighting for gun control. '}, {'emotion': 'Contentment', 'intensity': '3…
1118	Mom may have stopped school shooting by alerting police to harassing Facebook posts	anonymous-source/all_shooting_images_newest/100388.jpg	[{'emotion': 'Fear', 'intensity': '4', 'reason': 'The man looks fearful and the background looks like in prison'}, {'emotion': 'Fear', 'intensity': '3', 'reason': 'this guy is scary looking'}, {'emotion': 'Fear', 'intensity': '4', 'reason': 'That guy looks scary.'}, {'emotion': 'Sadness', 'intensity': '3', 'reason': 'The man is going to prison.'}, {'emotion': 'Contentment', 'intensity': '3', 'rea…
1122	Study: Guns send nearly 8,000 kids to ER each year in US	anonymous-source/all_shooting_images_newest/100219.jpg	[{'emotion': 'Awe', 'intensity': '4', 'reason': 'When the guns are combined with the US flag, it reminds me of the policy that US people should have the right to own guns to protect themselves.'}, {'emotion': 'Contentment', 'intensity': '3', 'reason': "it's just a picture of a bunch of guns with no context"}, {'emotion': 'Contentment', 'intensity': '1', 'reason': "This image doesn't speak to me."…
1123	Midterms 2018: As March for Our Lives champions firearms control, this Parkland victim s father says guns are not the problem	anonymous-source/all_shooting_images_newest/110115.jpg	[{'emotion': 'Amusement', 'intensity': '2', 'reason': 'Though the poster makes me concerned about the gun violence, the people on the balcony are having a party instead of protesting, which makes me feel interesting and funny'}, {'emotion': 'Excitement', 'intensity': '3', 'reason': 'I like seeing people speaking up for what they believe in'}, {'emotion': 'Contentment', 'intensity': '1', 'reason':…
1124	Gaming community honors Jacksonville shooting victims on social media: 'Champions forever'	anonymous-source/all_shooting_images_newest/132.jpg	[{'emotion': 'Fear', 'intensity': '5', 'reason': 'The police officers are assembling somewhere, when connecting to the gun violence, it makes me to feel that this place has just had a severe gun violence incident.'}, {'emotion': 'Fear', 'intensity': '3', 'reason': 'I see a lot of cop cars and that usually means something bad'}, {'emotion': 'Fear', 'intensity': '3', 'reason': "Something bad must'v…
1125	GOP lawmakers in Georgia punish Delta for crossing NRA	anonymous-source/all_shooting_images_newest/10098.jpg	[{'emotion': 'Fear', 'intensity': '2', 'reason': 'It confused me about what would Delta Airlines do with the gun violence. Is it because someone hijacked one of their aircraft?'}, {'emotion': 'Contentment', 'intensity': '3', 'reason': "it's just a bunch of airplanes with no context"}, {'emotion': 'Fear', 'intensity': '4', 'reason': 'Guns and planes do not mix for me.'}, {'emotion': 'Amusement', '…
1126	This Is Us Paid Emotional Tribute to the Pittsburgh Synagogue Shooting Victims	anonymous-source/all_shooting_images_newest/100100.jpg	[{'emotion': 'Sadness', 'intensity': '2', 'reason': 'Again, just by the picture, I cannot connect it to gun violence. Is this couple victims of gun violence, or they are the gunners?'}, {'emotion': 'Sadness', 'intensity': '3', 'reason': 'I am lonely and single'}, {'emotion': 'Contentment', 'intensity': '3', 'reason': 'What a nice couple. :)'}, {'emotion': 'Amusement', 'intensity': '3', 'reason': …
1128	Black man's death: Questions remain in Alabama mall shooting	anonymous-source/all_shooting_images_newest/110233.jpg	[{'emotion': 'Sadness', 'intensity': '2', 'reason': 'Just by the picture, I might assume the man is the victim and feel sadness because he is in a nice suit and the background information suggest that he is a wealthy person who is likely to be the victim of gun violence, but again, this man could also be the gunner of gun violence, I cannot give certain emotions unless I know who this guy is.'}, …
1131	Chicago, suburban libraries brace for the question: Can I print out a 3D gun?	anonymous-source/all_shooting_images_newest/96.jpg	[{'emotion': 'Fear', 'intensity': '2', 'reason': 'The gun in the picture looks so small, given the context of gun violence, it might be a new kind of gun that is easy to carry and deadly.'}, {'emotion': 'Amusement', 'intensity': '3', 'reason': 'that is a funny looking gun'}, {'emotion': 'Awe', 'intensity': '2', 'reason': 'That plastic gun looks cool.'}, {'emotion': 'Anger', 'intensity': '3', 'rea…
1132	Hearing scheduled as gun-rights advocacy groups look to overturn Deerfield assault weapons ban	anonymous-source/all_shooting_images_newest/100248.jpg	[{'emotion': 'Fear', 'intensity': '4', 'reason': 'Many guns are shown in the picture, which makes me feel fear and high pressure'}, {'emotion': 'Contentment', 'intensity': '3', 'reason': 'it is just a picture of guns with no context'}, {'emotion': 'Fear', 'intensity': '2', 'reason': 'That is a big rack of guns.'}, {'emotion': 'Anger', 'intensity': '3', 'reason': 'I feel angry about the gun. '}, {…
1136	Roseanne Barr slammed for tweet calling out 'racist anti-Semitic bigotry' after synagogue shooting	anonymous-source/all_shooting_images_newest/100130.jpg	[{'emotion': 'Sadness', 'intensity': '5', 'reason': 'The lady looks very sad, it might be she just lost someone she knows due to the gun violence.'}, {'emotion': 'Contentment', 'intensity': '3', 'reason': "it's a picture of a woman I don't know without context"}, {'emotion': 'Contentment', 'intensity': '2', 'reason': 'She seems sweet.'}, {'emotion': 'Sadness', 'intensity': '3', 'reason': 'I feel …
1141	Students across America plan school walkout in support of second amendment	anonymous-source/all_shooting_images_newest/10639.jpg	[{'emotion': 'Fear', 'intensity': '3', 'reason': 'guns should be banned'}, {'emotion': 'Awe', 'intensity': '3', 'reason': 'Sounds Neutral'}, {'emotion': 'Fear', 'intensity': '4', 'reason': 'scared to see all of these guns lined up '}, {'emotion': 'Fear', 'intensity': '4', 'reason': 'seeing the thing that makes so much killing in our country makes me feel uneasy. '}, {'emotion': 'Fear', 'intensity…
1143	Pittsburgh synagogue shooting: how conspiracy theory politics emboldens anti-Semitism	anonymous-source/all_shooting_images_newest/100014.jpg	[{'emotion': 'Sadness', 'intensity': '3', 'reason': 'many innocents died from the gun violence'}, {'emotion': 'Awe', 'intensity': '3', 'reason': 'Sounds Neutral'}, {'emotion': 'Sadness', 'intensity': '4', 'reason': 'this is clearly a funeral and it makes me sad '}, {'emotion': 'Sadness', 'intensity': '4', 'reason': 'This photo makes me feel sad because it looks like a funeral, and funerals are sa…
1149	Ivanka Trump says 'our hearts are with Jacksonville' after shooting	anonymous-source/all_shooting_images_newest/155.jpg	[{'emotion': 'Sadness', 'intensity': '3', 'reason': 'a young boy died due to a gun accident.'}, {'emotion': 'Awe', 'intensity': '3', 'reason': 'Sounds Neutral'}, {'emotion': 'Sadness', 'intensity': '4', 'reason': 'sad to hear about the shooting, but happy to hear that they are being recognized '}, {'emotion': 'Anger', 'intensity': '4', 'reason': 'We do not need thoughts and prayers we need real s…
1150	Cruz criticizes Democrats in wake of deadly California shooting	anonymous-source/all_shooting_images_newest/110119.jpg	[{'emotion': 'Fear', 'intensity': '3', 'reason': 'some emergency news are coming out'}, {'emotion': 'Awe', 'intensity': '3', 'reason': 'Sounds Neutral'}, {'emotion': 'Contentment', 'intensity': '3', 'reason': 'I do not know how to feel towards this photo '}, {'emotion': 'Disgust', 'intensity': '3', 'reason': 'Ted cruz perpetuates a lot of gun culture in his politics I feel disgusted by his face. …
1151	Remington to file for bankruptcy amid declining gun sales	anonymous-source/all_shooting_images_newest/10764.jpg	[{'emotion': 'Fear', 'intensity': '3', 'reason': 'more guns are made.'}, {'emotion': 'Awe', 'intensity': '3', 'reason': 'Sounds Neutral'}, {'emotion': 'Fear', 'intensity': '3', 'reason': 'scary to see a photo of these bullets '}, {'emotion': 'Fear', 'intensity': '4', 'reason': 'It is scary to see how small the thing is that causes so much damage. '}, {'emotion': 'Fear', 'intensity': '1', 'reason'…
1153	The Las Vegas Strip Will Go Dark to Honor the Victims of Last Year's Mass Shooting	anonymous-source/all_shooting_images_newest/100021.jpg	[{'emotion': 'Sadness', 'intensity': '3', 'reason': 'they memorize the victims'}, {'emotion': 'Contentment', 'intensity': '3', 'reason': 'looks peaceful'}, {'emotion': 'Sadness', 'intensity': '4', 'reason': 'sad to see hear about the shooting and the people that have lost their lives '}, {'emotion': 'Sadness', 'intensity': '4', 'reason': 'It is sad to see the place where so much pain and destruct…
1157	Retired Firefighter Sentenced For Shooting At Black Teen Who Sought Directions	anonymous-source/all_shooting_images_newest/110504.jpg	[{'emotion': 'Sadness', 'intensity': '3', 'reason': 'the image seems to show frustration and sadness at the same time'}, {'emotion': 'Fear', 'intensity': '3', 'reason': "don't feel anything special about this image"}, {'emotion': 'Anger', 'intensity': '2', 'reason': 'I do not know what the context of the image is but the subject looks upset and in the context of gun violence may possibly be suffe…
1161	Judge blocks posting of online plans for 3D printed guns	anonymous-source/all_shooting_images_newest/271.jpg	[{'emotion': 'Fear', 'intensity': '3', 'reason': 'guns and bullets are easily accessible like they are candy'}, {'emotion': 'Contentment', 'intensity': '3', 'reason': "don't feel anything special about this image"}, {'emotion': 'Fear', 'intensity': '3', 'reason': '3d printed gun makes me angry that people have the ability to make guns at home with no oversight'}, {'emotion': 'Anger', 'intensity':…
1162	Parkland parents pushing politicians to address gun violence	anonymous-source/all_shooting_images_newest/239.jpg	[{'emotion': 'Contentment', 'intensity': '3', 'reason': 'people are taking action to bring about change'}, {'emotion': 'Anger', 'intensity': '3', 'reason': "don't feel anything special about this image"}, {'emotion': 'Sadness', 'intensity': '3', 'reason': 'they seem to be victims of a school shooting mourning, and/or protesting. Frustrated that kids so young have to push for political change to k…
1163	Texas Church Shooter Was Ticking Time Bomb	anonymous-source/all_shooting_images_newest/10267.jpg	[{'emotion': 'Sadness', 'intensity': '3', 'reason': 'deaths from gun violence is not inevitable'}, {'emotion': 'Awe', 'intensity': '3', 'reason': "don't feel anything special about this image"}, {'emotion': 'Sadness', 'intensity': '2', 'reason': 'they also seem to be mourning a great deal of people. '}, {'emotion': 'Anger', 'intensity': '5', 'reason': 'I have finished all 4 sections already!!!!!!…
1164	Trump calls for death penalty after synagogue shooting; leaders react to tragedy with sorrow, anger and frustration	anonymous-source/all_shooting_images_newest/100205.jpg	[{'emotion': 'Fear', 'intensity': '3', 'reason': 'gun violence can break out at any time'}, {'emotion': 'Anger', 'intensity': '3', 'reason': "don't feel anything special about this image"}, {'emotion': 'Fear', 'intensity': '3', 'reason': 'people are injured causing me to be concerned for their safety and well-being'}, {'emotion': 'Anger', 'intensity': '5', 'reason': 'I have finished all 4 section…
1171	States Sue Trump Administration To Block Release Of 3D-Printed Gun Blueprints	anonymous-source/all_shooting_images_newest/315.jpg	[{'emotion': 'Anger', 'intensity': '3', 'reason': 'it is easily accessible to people'}, {'emotion': 'Fear', 'intensity': '3', 'reason': "don't feel anything special about this image"}, {'emotion': 'Fear', 'intensity': '3', 'reason': '3d printed gun makes me angry that people have the ability to make guns at home with no oversight'}, {'emotion': 'Anger', 'intensity': '5', 'reason': 'I have finishe…
1173	Dems say GOP focus on mental health is redirection from gun control	anonymous-source/all_shooting_images_newest/10435.jpg	[{'emotion': 'Sadness', 'intensity': '3', 'reason': 'children deserve better than this. '}, {'emotion': 'Excitement', 'intensity': '3', 'reason': "don't feel anything special about this image"}, {'emotion': 'Sadness', 'intensity': '3', 'reason': 'vigil for fallen people'}, {'emotion': 'Anger', 'intensity': '5', 'reason': 'I have finished all 4 sections already!!!!!!!!!!!!!!!!!!!!!!'}, {'emotion':…
1180	Cuomo urges other states to hit NRA finances as group claims losses	anonymous-source/all_shooting_images_newest/247.jpg	[{'emotion': 'Contentment', 'intensity': '4', 'reason': 'seems like a sign of guarantee to people'}, {'emotion': 'Excitement', 'intensity': '4', 'reason': 'it looks like change is happening'}, {'emotion': 'Contentment', 'intensity': '1', 'reason': "I don't know who this man is"}, {'emotion': 'Excitement', 'intensity': '3', 'reason': 'regardless of what this governor has done i feel like he could …
1182	Why Australia's famed gun control laws probably wouldn't reduce shooting deaths in America	anonymous-source/all_shooting_images_newest/90194.jpg	[{'emotion': 'Anger', 'intensity': '4', 'reason': 'production of bigger guns'}, {'emotion': 'Fear', 'intensity': '4', 'reason': 'those are a lot of guns'}, {'emotion': 'Anger', 'intensity': '3', 'reason': 'why do we need such big guns '}, {'emotion': 'Anger', 'intensity': '3', 'reason': 'as i hate guns and the way they are just laid out like that with no safety'}, {'emotion': 'Fear', 'intensity':…
1184	Tragedy of grand scale': Victims remembered 1 year after Vegas shooting	anonymous-source/all_shooting_images_newest/100256.jpg	[{'emotion': 'Sadness', 'intensity': '3', 'reason': 'looking at all the people passed away'}, {'emotion': 'Sadness', 'intensity': '5', 'reason': 'I am assuming that these are tomb stones of gun violence victims'}, {'emotion': 'Sadness', 'intensity': '3', 'reason': 'these people probably died to gun violence'}, {'emotion': 'Sadness', 'intensity': '3', 'reason': 'for all the lives lost due to gun v…
1185	For Parkland students, reminders of deadly shooting are 'everywhere you go'	anonymous-source/all_shooting_images_newest/10548.jpg	[{'emotion': 'Sadness', 'intensity': '4', 'reason': 'seeing people being move away due to shootings '}, {'emotion': 'Fear', 'intensity': '5', 'reason': 'I wonder what these children are going through'}, {'emotion': 'Sadness', 'intensity': '3', 'reason': 'kids have to fear for their life whenever they go to school now'}, {'emotion': 'Sadness', 'intensity': '3', 'reason': 'that school students go t…
1194	Trump orders flags lowered to half-staff in solemn respect for synagogue shooting victims	anonymous-source/all_shooting_images_newest/100270.jpg	[{'emotion': 'Sadness', 'intensity': '3', 'reason': 'showing her pain infront of the whitehous'}, {'emotion': 'Fear', 'intensity': '4', 'reason': 'I wonder what the background of this photo is. It looks ominous and dangerous.'}, {'emotion': 'Sadness', 'intensity': '3', 'reason': 'this is probably a memorial'}, {'emotion': 'Sadness', 'intensity': '3', 'reason': 'for all the lives lost '}, {'emotio…
1201	Gun-rights hysteria doesn't sell in the Trump era	anonymous-source/all_shooting_images_newest/10425.jpg	[{'emotion': 'Fear', 'intensity': '4', 'reason': 'guns scare me'}, {'emotion': 'Fear', 'intensity': '3', 'reason': 'there are many weapons.'}, {'emotion': 'Fear', 'intensity': '3', 'reason': 'The bullets seem very cold and horrifying '}, {'emotion': 'Awe', 'intensity': '3', 'reason': 'ammos make me refrain myself'}, {'emotion': 'Disgust', 'intensity': '3', 'reason': 'why are such large bullets ne…
1203	Garden provides place to mourn Las Vegas shooting victims	anonymous-source/all_shooting_images_newest/90343.jpg	[{'emotion': 'Sadness', 'intensity': '4', 'reason': 'gun violence is something that should not exist'}, {'emotion': 'Sadness', 'intensity': '3', 'reason': 'it mourned for the innocent victims.'}, {'emotion': 'Sadness', 'intensity': '4', 'reason': 'seeing victims pictures hanging makes me feel really sad and sorry '}, {'emotion': 'Sadness', 'intensity': '3', 'reason': 'sad for the lost souls'}, {'…
1206	This Is Our Lane': Doctors Slam NRA After Chicago Hospital Shooting	anonymous-source/all_shooting_images_newest/110269.jpg	[{'emotion': 'Sadness', 'intensity': '2', 'reason': 'The nurse/doctor seems exhausted'}, {'emotion': 'Awe', 'intensity': '3', 'reason': "doctors are saving people's lives whereas NRA is threatening people's lives"}, {'emotion': 'Sadness', 'intensity': '3', 'reason': "this person's face looks very sad "}, {'emotion': 'Sadness', 'intensity': '3', 'reason': 'this doctor looks sad'}, {'emotion': 'Sad…
1207	US 'crypto-anarchist' sees 3D-printed guns as fundamental right	anonymous-source/all_shooting_images_newest/482.jpg	[{'emotion': 'Fear', 'intensity': '4', 'reason': 'Access to guns is too easy'}, {'emotion': 'Fear', 'intensity': '3', 'reason': 'more weapons will be made.'}, {'emotion': 'Fear', 'intensity': '3', 'reason': 'the gun seems horrifying '}, {'emotion': 'Excitement', 'intensity': '3', 'reason': 'we can print our own weapons now'}, {'emotion': 'Anger', 'intensity': '5', 'reason': 'assuming this is the …
1211	NRA to spend $1 million on pro-Kavanaugh ads: SCOTUS pick will protect right to keep and bear arms	anonymous-source/all_shooting_images_newest/474.jpg	[{'emotion': 'Fear', 'intensity': '4', 'reason': 'Guns are scary!!!'}, {'emotion': 'Fear', 'intensity': '3', 'reason': 'more guns are made.'}, {'emotion': 'Fear', 'intensity': '3', 'reason': 'these guns could lead to the death of many people if they are misusing'}, {'emotion': 'Excitement', 'intensity': '4', 'reason': 'these guns look fresh'}, {'emotion': 'Anger', 'intensity': '3', 'reason': 'so …
1212	Cheers, boos and tense exchanges on day of confrontation over guns	anonymous-source/all_shooting_images_newest/10139.jpg	[{'emotion': 'Excitement', 'intensity': '4', 'reason': 'I am hoping that people fight for gun control and the abolishment of the right to bear arms'}, {'emotion': 'Excitement', 'intensity': '3', 'reason': 'gun should be banned for safer future.'}, {'emotion': 'Sadness', 'intensity': '3', 'reason': 'the kids do not feel sate at school '}, {'emotion': 'Awe', 'intensity': '3', 'reason': 'respect to …
1214	Today's talker: Could 'mistreatment' of shooter justify Santa Fe killings?	anonymous-source/all_shooting_images_newest/10629.jpg	[{'emotion': 'Sadness', 'intensity': '4', 'reason': 'These things happen way too often- thoughts and prayers are not enough.'}, {'emotion': 'Anger', 'intensity': '3', 'reason': 'gun regulation should be passed '}, {'emotion': 'Sadness', 'intensity': '3', 'reason': 'the victims to gun violence is increasing...'}, {'emotion': 'Anger', 'intensity': '4', 'reason': 'none of these can really alleviate …
1217	Jeffrey Zeigler in court on Tuesday, when he was sentenced to at least four years in prison. Credit Credit Todd McInturf/Detroit News, via Associated Press By Sarah Mervosh Nov. 13, 2018 A white man who fired a shotgun	anonymous-source/all_shooting_images_newest/110103.jpg	[{'emotion': 'Sadness', 'intensity': '1', 'reason': 'mourning a loss that was preventable is heavy work to do'}, {'emotion': 'Sadness', 'intensity': '1', 'reason': 'mourning a loss that was preventable is heavy work to do'}, {'emotion': 'Sadness', 'intensity': '3', 'reason': 'To me it looks like a father who had just lost his child to gun violence. The worst part is the realization that he probab…
1218	Commentary: This is how common school shootings are in America	anonymous-source/all_shooting_images_newest/110476.jpg	[{'emotion': 'Sadness', 'intensity': '3', 'reason': 'the amount of calls that go through in these times are so stressful and anxious'}, {'emotion': 'Sadness', 'intensity': '3', 'reason': 'the amount of calls that go through in these times are so stressful and anxious'}, {'emotion': 'Fear', 'intensity': '3', 'reason': 'Everyone in the image looks so terrified but not for themselves but for the peo…
1220	Trump to visit Pittsburgh in response to synagogue shooting	anonymous-source/all_shooting_images_newest/100122.jpg	[{'emotion': 'Disgust', 'intensity': '2', 'reason': 'man does absolutely nothing but perpetuate white supremacy '}, {'emotion': 'Disgust', 'intensity': '2', 'reason': 'man does absolutely nothing but perpetuate white supremacy '}, {'emotion': 'Disgust', 'intensity': '3', 'reason': 'To me Trump has no care in the world for the civilians of the United States and its disgusting to see him hold such …
1221	Homemade Guns Are a Much Bigger Threat Than 3D-Printed Firearms	anonymous-source/all_shooting_images_newest/180.jpg	[{'emotion': 'Fear', 'intensity': '4', 'reason': 'i just want to know why these are a thing?'}, {'emotion': 'Fear', 'intensity': '4', 'reason': 'i just want to know why these are a thing?'}, {'emotion': 'Fear', 'intensity': '3', 'reason': 'As someone who grew up in a period where school shootings were common, seeing toy guns depicts a very different feeling for them. Instead of seeing it as a for…
1224	WATCH LIVE: Senator Bill Nelson speaks after mass shooting at Jacksonville Landing	anonymous-source/all_shooting_images_newest/475.jpg	[{'emotion': 'Fear', 'intensity': '3', 'reason': 'active police/crime scenes give me anxiety '}, {'emotion': 'Fear', 'intensity': '3', 'reason': 'active police/crime scenes give me anxiety '}, {'emotion': 'Fear', 'intensity': '3', 'reason': 'Based on the red tape and cop cars its clear that some form of gun violence took place and ultimately led to someones death. Its scary to see how it can happ…
1227	White Man Accused Of Pulling Gun On Muslim Teens At Minnesota McDonald s	anonymous-source/all_shooting_images_newest/110114.jpg	[{'emotion': 'Fear', 'intensity': '3', 'reason': "you never know who's armed and if you could get into a bad position or not"}, {'emotion': 'Fear', 'intensity': '3', 'reason': "you never know who's armed and if you could get into a bad position or not"}, {'emotion': 'Fear', 'intensity': '3', 'reason': 'Not really sure how this relates to gun violence'}, {'emotion': 'Fear', 'intensity': '3', 'reas…
1229	Trump meets with families affected by Texas shooting, mother calls him 'toddler'	anonymous-source/all_shooting_images_newest/10777.jpg	[{'emotion': 'Disgust', 'intensity': '3', 'reason': 'Trump is a vile man and I wish he was never president (although I don\'t think that any presidents have been "good")'}, {'emotion': 'Disgust', 'intensity': '3', 'reason': 'Trump is a vile man and I wish he was never president (although I don\'t think that any presidents have been "good")'}, {'emotion': 'Disgust', 'intensity': '3', 'reason': "Tr…
1232	November 7 1:04 PM Washington voters approve tough gun control measures	anonymous-source/all_shooting_images_newest/110276.jpg	[{'emotion': 'Fear', 'intensity': '3', 'reason': 'these guns are absolutely massive unnecessarily dangerous'}, {'emotion': 'Fear', 'intensity': '3', 'reason': 'these guns are absolutely massive unnecessarily dangerous'}, {'emotion': 'Fear', 'intensity': '3', 'reason': "I think those who advocate for second amendment rights and gun production companies have glorified the weapon to a point where pe…
1233	After Santa Fe School Shooting, Texas Town Grapples With Bullying	anonymous-source/all_shooting_images_newest/10053.jpg	[{'emotion': 'Sadness', 'intensity': '3', 'reason': 'why do we have to keep on living like this?'}, {'emotion': 'Sadness', 'intensity': '3', 'reason': 'why do we have to keep on living like this?'}, {'emotion': 'Sadness', 'intensity': '3', 'reason': 'Seeing something like this occur on a school yard is so saddening to see because most of us have always associated school yards as a place for reces…
1234	Maryland shooting sparks reactions from politicians: 'Our prayers are with all those impacted'	anonymous-source/all_shooting_images_newest/90061.jpg	[{'emotion': 'Fear', 'intensity': '3', 'reason': 'anytime a scene looks like this something bad has happened'}, {'emotion': 'Fear', 'intensity': '3', 'reason': 'anytime a scene looks like this something bad has happened'}, {'emotion': 'Sadness', 'intensity': '3', 'reason': "Although we can see if this is outside a school, the stop sign for me symbolizes a school environment. It's crazy to see how…
1237	Accused Fredericton shooter will undergo psych assessment	anonymous-source/all_shooting_images_newest/110370.jpg	[{'emotion': 'Sadness', 'intensity': '2', 'reason': 'This person has done something bad'}, {'emotion': 'Sadness', 'intensity': '2', 'reason': 'the innate looks kinda ashamed and regretful of his situations'}, {'emotion': 'Sadness', 'intensity': '3', 'reason': 'This people hurt someone and get pubished.'}, {'emotion': 'Fear', 'intensity': '2', 'reason': 'I felt fear because seeing someone in handc…
1241	Undetectable' plastic 3-D printed guns have been detected by TSA airport screeners	anonymous-source/all_shooting_images_newest/222.jpg	[{'emotion': 'Anger', 'intensity': '3', 'reason': 'This kind of gun may be hard to find '}, {'emotion': 'Awe', 'intensity': '3', 'reason': 'this looks like some high tech equipment that one should better be cautious when operating it'}, {'emotion': 'Fear', 'intensity': '3', 'reason': 'Someone may die or get hurt.'}, {'emotion': 'Fear', 'intensity': '3', 'reason': 'I feel fear because this looks l…
1243	The Latest: Shooting survivors focus anger at Trump, tweets	anonymous-source/all_shooting_images_newest/10116.jpg	[{'emotion': 'Sadness', 'intensity': '4', 'reason': 'Some people have dead there.'}, {'emotion': 'Sadness', 'intensity': '4', 'reason': 'this is some memorial scene'}, {'emotion': 'Sadness', 'intensity': '3', 'reason': 'Sad for the people dead.'}, {'emotion': 'Sadness', 'intensity': '4', 'reason': 'This image makes me sad because it looks like tragedy has occurred.'}, {'emotion': 'Sadness', 'inte…
1244	Wisconsin and Maryland shooters both had history of mental illness	anonymous-source/all_shooting_images_newest/90244.jpg	[{'emotion': 'Disgust', 'intensity': '4', 'reason': 'It is dangerous to drive in such road'}, {'emotion': 'Awe', 'intensity': '3', 'reason': 'the car looks like it got shot'}, {'emotion': 'Sadness', 'intensity': '3', 'reason': 'Someone may die or get hurt.s'}, {'emotion': 'Fear', 'intensity': '2', 'reason': 'This image makes me scared because it looks like something bad has happened, and in relat…
1253	Texas Governor Scraps Campaign Contest to Give Away Shotgun	anonymous-source/all_shooting_images_newest/10123.jpg	[{'emotion': 'Sadness', 'intensity': '3', 'reason': 'Some people has dead'}, {'emotion': 'Awe', 'intensity': '4', 'reason': 'the old man is handicapped and in his wheelchair all suited up and holding a blossom of tulips, very likely on his way to a funeral'}, {'emotion': 'Sadness', 'intensity': '3', 'reason': 'Sad for those people get hurt in gun violence.'}, {'emotion': 'Sadness', 'intensity': '…
1254	Border Patrol agent accused of killing 4 stockpiled weapons and sought 'suicide by cop' : Police	anonymous-source/all_shooting_images_newest/90258.jpg	[{'emotion': 'Disgust', 'intensity': '3', 'reason': 'It seems hard to deal with gun violence '}, {'emotion': 'Sadness', 'intensity': '3', 'reason': 'car accident scene, hopefully nobody injured or died'}, {'emotion': 'Fear', 'intensity': '3', 'reason': 'Someone use guns to hurt other people.'}, {'emotion': 'Sadness', 'intensity': '4', 'reason': 'This image makes me feel sadness because it looks l…
1256	Ellen DeGeneres, Mandy Moore and More Stars React to Shooting at Pittsburgh Synagogue	anonymous-source/all_shooting_images_newest/100273.jpg	[{'emotion': 'Contentment', 'intensity': '1', 'reason': 'I don’t know who they are'}, {'emotion': 'Amusement', 'intensity': '3', 'reason': 'i feel like participating in the red carpet walk in the walk of fame in Hollywood boulevard '}, {'emotion': 'Contentment', 'intensity': '3', 'reason': 'This would make more people know about gun controll.'}, {'emotion': 'Contentment', 'intensity': '2', 'reaso…
1258	Is the NRA going bankrupt? Group Claims it Will Soon be Unable to Exist Due to Financial Difficulties	anonymous-source/all_shooting_images_newest/232.jpg	[{'emotion': 'Contentment', 'intensity': '3', 'reason': 'dont have context to this '}, {'emotion': 'Fear', 'intensity': '2', 'reason': 'The display of so many guns made me feel anxious and unsafe'}, {'emotion': 'Fear', 'intensity': '2', 'reason': 'The guns are dangerous'}, {'emotion': 'Fear', 'intensity': '2', 'reason': 'Slightly scared because of the hand on trigger, but no humans pictured makes…
1262	Seattle gun storage law 'eminently reasonable,' judge says in tossing NRA, gun group's lawsuit	anonymous-source/all_shooting_images_newest/100240.jpg	[{'emotion': 'Fear', 'intensity': '3', 'reason': 'makes me think of wars'}, {'emotion': 'Fear', 'intensity': '3', 'reason': 'Although portrays of guns are not uncommon in the media, the picture of guns can still trigger anxiety and fears'}, {'emotion': 'Excitement', 'intensity': '2', 'reason': 'It would be nice to practice guns'}, {'emotion': 'Fear', 'intensity': '2', 'reason': "Slight fear and d…
1265	To Defend Against School Shootings, Massachusetts District Is Passing Out Emergency Buckets With Hammer, Rope	anonymous-source/all_shooting_images_newest/367.jpg	[{'emotion': 'Sadness', 'intensity': '3', 'reason': 'school shootings make me feel realy sad '}, {'emotion': 'Fear', 'intensity': '5', 'reason': 'Feeling of intense fear not only because of the man holding a gun but also the setting of the image - school, and also the light and shadow is creating that negative and unstable feeling.'}, {'emotion': 'Fear', 'intensity': '5', 'reason': 'He is practic…
1269	Tennessee lawmaker says pornography is a 'root cause' of school shootings	anonymous-source/all_shooting_images_newest/10330.jpg	[{'emotion': 'Contentment', 'intensity': '3', 'reason': 'dont have context '}, {'emotion': 'Contentment', 'intensity': '1', 'reason': "Seems like she's representing the republic to give a speech on some issue but hard to tell "}, {'emotion': 'Awe', 'intensity': '2', 'reason': 'She seems to e addressing gun violence issues.'}, {'emotion': 'Contentment', 'intensity': '3', 'reason': "Don't recognize…
1270	Montana Gov. Steve Bullock says he 'would' support assault weapons ban	anonymous-source/all_shooting_images_newest/356.jpg	[{'emotion': 'Contentment', 'intensity': '3', 'reason': 'dont have context '}, {'emotion': 'Amusement', 'intensity': '1', 'reason': 'he looks positive and happy'}, {'emotion': 'Amusement', 'intensity': '3', 'reason': 'He seems happy and I can feel it'}, {'emotion': 'Contentment', 'intensity': '3', 'reason': "don't recognize him"}, {'emotion': 'Contentment', 'intensity': '3', 'reason': "i'm not aw…
1274	Gunman targeting Jews kills 11 in Pittsburgh synagogue	anonymous-source/all_shooting_images_newest/100379.jpg	[{'emotion': 'Sadness', 'intensity': '3', 'reason': 'people shouldnt have to deal with any kind of violence'}, {'emotion': 'Awe', 'intensity': '3', 'reason': 'Warm colors and low contrast make the image look soft and tranquil'}, {'emotion': 'Sadness', 'intensity': '5', 'reason': "I'm sorry for their loss"}, {'emotion': 'Sadness', 'intensity': '2', 'reason': 'A serious image and her facial express…
1276	'Alarming' rise in eye injuries from BB, pellet and paintball guns in kids	anonymous-source/all_shooting_images_newest/10781.jpg	[{'emotion': 'Contentment', 'intensity': '3', 'reason': 'dont have context '}, {'emotion': 'Contentment', 'intensity': '1', 'reason': "I won't relate this image to gun violence without the instructions. "}, {'emotion': 'Contentment', 'intensity': '2', 'reason': 'He is testing his sight, which is beneficial for his health'}, {'emotion': 'Contentment', 'intensity': '3', 'reason': "don't associate t…
1283	A Community Response to Mass Shooting Forum and Discussion	anonymous-source/all_shooting_images_newest/10663.jpg	[{'emotion': 'Sadness', 'intensity': '3', 'reason': 'children have to campaign for change'}, {'emotion': 'Sadness', 'intensity': '3', 'reason': 'RIP.'}, {'emotion': 'Sadness', 'intensity': '3', 'reason': 'I feel sad because I hate seeing people mourn'}, {'emotion': 'Contentment', 'intensity': '3', 'reason': 'It looks like parade against gun violence.'}, {'emotion': 'Sadness', 'intensity': '2', 'r…
1284	Dems vow swift action on gun reform next year | TheHill	anonymous-source/all_shooting_images_newest/110052.jpg	[{'emotion': 'Sadness', 'intensity': '3', 'reason': 'law enforcement is inflicting gun violence too'}, {'emotion': 'Fear', 'intensity': '4', 'reason': 'When can we say we are safe?'}, {'emotion': 'Contentment', 'intensity': '3', 'reason': 'this is just a picture of a cop with no context'}, {'emotion': 'Awe', 'intensity': '3', 'reason': 'It looks like the police is enforcing the law.'}, {'emotion'…
1285	Capital Gazette gunman constantly harassed journalists on Twitter. Why wasn't he stopped?	anonymous-source/all_shooting_images_newest/10242.jpg	[{'emotion': 'Sadness', 'intensity': '3', 'reason': 'of the frequency of gun violence'}, {'emotion': 'Sadness', 'intensity': '3', 'reason': '5 people died.'}, {'emotion': 'Sadness', 'intensity': '4', 'reason': 'I feel sad when people die'}, {'emotion': 'Sadness', 'intensity': '4', 'reason': "It's really sad to see some people died of gun violence."}, {'emotion': 'Sadness', 'intensity': '2', 'reas…
1292	Anti-gun student walkout included stomping on American flag and jumping on cop car	anonymous-source/all_shooting_images_newest/10001.jpg	[{'emotion': 'Sadness', 'intensity': '3', 'reason': 'because people could be in danger at any time because of arms'}, {'emotion': 'Fear', 'intensity': '3', 'reason': 'Chaos leads to violence.'}, {'emotion': 'Sadness', 'intensity': '3', 'reason': 'This image makes me sad because people usually record crazy incidents like this before helping out'}, {'emotion': 'Fear', 'intensity': '3', 'reason': 'I…
1293	Trump's silence on Waffle House shooting speaks volumes	anonymous-source/all_shooting_images_newest/10706.jpg	[{'emotion': 'Sadness', 'intensity': '3', 'reason': 'innocent lives are taken by gun violence'}, {'emotion': 'Sadness', 'intensity': '4', 'reason': 'Sorry for their loss.'}, {'emotion': 'Sadness', 'intensity': '4', 'reason': 'I feel sad when I see people mourning'}, {'emotion': 'Sadness', 'intensity': '3', 'reason': 'Sorry about the gun violence victim.'}, {'emotion': 'Sadness', 'intensity': '3',…
1296	Democrats Plan to Pursue Aggressive Gun-Control Legislation	anonymous-source/all_shooting_images_newest/110031.jpg	[{'emotion': 'Awe', 'intensity': '3', 'reason': 'it seems like a intense momemt'}, {'emotion': 'Contentment', 'intensity': '3', 'reason': 'They got what they want.'}, {'emotion': 'Contentment', 'intensity': '3', 'reason': 'this is just a picture of people with no context'}, {'emotion': 'Contentment', 'intensity': '3', 'reason': 'It looks like them are agreeing on something.'}, {'emotion': 'Sadnes…
