# Supplementary material
Source: ML conference proceedings conference paper supplement (https://aclanthology.org/2022.aacl-main.29)
Supplement: Dataset [file 2022.aacl-main.29.Dataset.zip › NEmoP/NEmoP-Consensus/NEmoP-CE/NEmoP-CE-T.csv]

	Headline	url	text_responses
1	Emma Gonzalez Brought to Tears Honoring Victims of Gun Violence	anonymous-source/all_shooting_images_newest/100502.jpg	[{'emotion': 'Sadness', 'intensity': '3', 'reason': 'gun violence is such a serious issue '}, {'emotion': 'Sadness', 'intensity': '3', 'reason': 'it is sad to know the lost of someone'}, {'emotion': 'Sadness', 'intensity': '4', 'reason': 'sad story '}, {'emotion': 'Sadness', 'intensity': '3', 'reason': "the trauma that victims' families have to undergo is unimaginable. "}, {'emotion': 'Contentmen…
6	Teenagers will lead the charge and demand change at anti-gun violence March for Our Lives	anonymous-source/all_shooting_images_newest/10466.jpg	[{'emotion': 'Excitement', 'intensity': '4', 'reason': 'it talks of change '}, {'emotion': 'Excitement', 'intensity': '4', 'reason': 'Glad to see how teenagers speak up regarding anti-gun violence. The power of teenagers should not be neglected.'}, {'emotion': 'Contentment', 'intensity': '2', 'reason': 'not really feeling anything '}, {'emotion': 'Awe', 'intensity': '3', 'reason': 'teenagers are …
10	Family that took in Florida shooting suspect call him a 'monster' and say they had no clue what he was planning	anonymous-source/all_shooting_images_newest/10551.jpg	[{'emotion': 'Sadness', 'intensity': '4', 'reason': 'they probably feel some responsibility '}, {'emotion': 'Disgust', 'intensity': '2', 'reason': "It seems like they are trying to get rid of the relationship with the shooting suspect, though I might be wrong because I don't know the full story."}, {'emotion': 'Sadness', 'intensity': '2', 'reason': 'understand why the family say this '}, {'emotio…
14	The shooting at a Madden video game tournament in Florida has shaken esports gamers and leagues in the fast-growing industry	anonymous-source/all_shooting_images_newest/12.jpg	[{'emotion': 'Sadness', 'intensity': '3', 'reason': 'this was a shooting in an event with innocence '}, {'emotion': 'Sadness', 'intensity': '2', 'reason': 'it is sorry to see the industry is influenced by these negative stories'}, {'emotion': 'Fear', 'intensity': '2', 'reason': 'feel bad about this people in the tournament '}, {'emotion': 'Sadness', 'intensity': '3', 'reason': 'the shooting in re…
15	Doctors Need to Talk to Families About Guns and Dementia	anonymous-source/all_shooting_images_newest/100427.jpg	[{'emotion': 'Sadness', 'intensity': '3', 'reason': 'this is an obvious thing '}, {'emotion': 'Excitement', 'intensity': '5', 'reason': ' I really want to see if this will impact gun violence in the future'}, {'emotion': 'Contentment', 'intensity': '2', 'reason': "sounds good but don't know why it is doctors to do so "}, {'emotion': 'Sadness', 'intensity': '3', 'reason': 'violence and mental illn…
16	Hundreds of Malibu students and their families march against gun violence, call for stricter gun control laws	anonymous-source/all_shooting_images_newest/10475.jpg	[{'emotion': 'Awe', 'intensity': '4', 'reason': 'it is empowering '}, {'emotion': 'Awe', 'intensity': '3', 'reason': 'They are full of courage to call for an action'}, {'emotion': 'Contentment', 'intensity': '2', 'reason': 'support them to do so '}, {'emotion': 'Sadness', 'intensity': '3', 'reason': 'students and their families are the people who are impacted by the gun violence at schools the mo…
17	Pittsburgh shooting: US Muslim groups raise more than $110,000 for synagogue attack victims	anonymous-source/all_shooting_images_newest/100398.jpg	[{'emotion': 'Awe', 'intensity': '4', 'reason': 'it restores faith in humanity '}, {'emotion': 'Awe', 'intensity': '3', 'reason': 'the willingness to help others worths respect'}, {'emotion': 'Contentment', 'intensity': '2', 'reason': 'sounds good and the victim deserve help '}, {'emotion': 'Sadness', 'intensity': '3', 'reason': 'religious hostility causes unnecessary violence and death.'}, {'emo…
21	Doctors pay tribute to Chicago shooting victim Tamara O'Neal, MD:'We are so sorry we couldn't protect you'	anonymous-source/all_shooting_images_newest/110264.jpg	[{'emotion': 'Sadness', 'intensity': '3', 'reason': 'Sad for victims.'}, {'emotion': 'Fear', 'intensity': '3', 'reason': 'failure to protect '}, {'emotion': 'Sadness', 'intensity': '2', 'reason': 'This is so sad'}, {'emotion': 'Awe', 'intensity': '4', 'reason': 'He said we could not protect you'}, {'emotion': 'Sadness', 'intensity': '4', 'reason': 'Doctors do as much as they can to save lives and…
28	Bank of America to stop lending to military-style weapons makers	anonymous-source/all_shooting_images_newest/10391.jpg	[{'emotion': 'Contentment', 'intensity': '3', 'reason': 'Weapons makers are dangerous.'}, {'emotion': 'Excitement', 'intensity': '3', 'reason': 'they did the right thing '}, {'emotion': 'Amusement', 'intensity': '3', 'reason': 'Why is BOA giving guns?'}, {'emotion': 'Amusement', 'intensity': '3', 'reason': 'I like it '}, {'emotion': 'Contentment', 'intensity': '3', 'reason': "if they sell them on…
30	The Kentucky Supermarket Shooting That Left Two Black People Dead Is Being Investigated As A Hate Crime	anonymous-source/all_shooting_images_newest/100493.jpg	[{'emotion': 'Sadness', 'intensity': '3', 'reason': 'Sad for the victims.'}, {'emotion': 'Fear', 'intensity': '3', 'reason': 'hate crime '}, {'emotion': 'Sadness', 'intensity': '4', 'reason': 'As it should a hate crime. '}, {'emotion': 'Fear', 'intensity': '3', 'reason': 'I do not like it '}, {'emotion': 'Sadness', 'intensity': '3', 'reason': 'more laws should be in place to avoid hate crimes '},…
34	Gun-related homicides, suicides kill more people than war, study says	anonymous-source/all_shooting_images_newest/126.jpg	[{'emotion': 'Sadness', 'intensity': '3', 'reason': 'Gun-related homicides, suicides kill more people than war. It is pathetic.'}, {'emotion': 'Sadness', 'intensity': '3', 'reason': 'deaths related to gun violence '}, {'emotion': 'Awe', 'intensity': '3', 'reason': 'That is a very shocking stat'}, {'emotion': 'Sadness', 'intensity': '3', 'reason': 'I do not like it '}, {'emotion': 'Sadness', 'inte…
35	Spokane, Wash. ends gun sales by police after probe	anonymous-source/all_shooting_images_newest/110042.jpg	[{'emotion': 'Contentment', 'intensity': '3', 'reason': "Ending gun sales may save somebody's life."}, {'emotion': 'Contentment', 'intensity': '3', 'reason': 'ends gun sales'}, {'emotion': 'Awe', 'intensity': '3', 'reason': 'What is a probe?'}, {'emotion': 'Fear', 'intensity': '3', 'reason': 'I do not like it '}, {'emotion': 'Contentment', 'intensity': '4', 'reason': 'good on Washington for knowi…
41	A Black Security Guard Was Killed By Police As He Tried To Stop A Shooting	anonymous-source/all_shooting_images_newest/110335.jpg	[{'emotion': 'Anger', 'intensity': '4', 'reason': 'the police killed an innocent man for no reason'}, {'emotion': 'Disgust', 'intensity': '5', 'reason': 'that is an absolutely disgusting scenario–that someone trying to safe lives gets theirs taken because of prejudices among the police.'}, {'emotion': 'Sadness', 'intensity': '4', 'reason': 'I feel like it a racist issue '}, {'emotion': 'Disgust',…
43	Trump Made False Claims About 9/11 to Justify Hosting a Rally After the Synagogue Shooting	anonymous-source/all_shooting_images_newest/100082.jpg	[{'emotion': 'Disgust', 'intensity': '4', 'reason': 'trump is a disgusting human to justify his actions'}, {'emotion': 'Disgust', 'intensity': '4', 'reason': 'it is never okay to make false claims to serve your own agenda'}, {'emotion': 'Amusement', 'intensity': '3', 'reason': 'I think its funny that president of United States would do something like that'}, {'emotion': 'Sadness', 'intensity': '3…
44	Judge blocks distribution of 3D-printed gun blueprints until case is resolved	anonymous-source/all_shooting_images_newest/128.jpg	[{'emotion': 'Contentment', 'intensity': '2', 'reason': 'for now i am content but intriguied to see the next steps'}, {'emotion': 'Contentment', 'intensity': '3', 'reason': 'the distribution of 3D-printed gun blueprints should not happen.'}, {'emotion': 'Contentment', 'intensity': '3', 'reason': 'I think the judge did a right thing'}, {'emotion': 'Contentment', 'intensity': '4', 'reason': 'that i…
45	'Stay in your lane': Doctors fire back at the NRA over guns	anonymous-source/all_shooting_images_newest/110065.jpg	[{'emotion': 'Awe', 'intensity': '2', 'reason': 'the doctors stood their ground and spoke the truth'}, {'emotion': 'Amusement', 'intensity': '3', 'reason': 'I agree with the Doctor'}, {'emotion': 'Awe', 'intensity': '3', 'reason': 'I think its unbelievable that some would say something like that especially a doctor'}, {'emotion': 'Contentment', 'intensity': '3', 'reason': 'the title is vague'}, {…
46	Firearms, violence and hate crimes are public health issues we must address immediately | TheHill	anonymous-source/all_shooting_images_newest/110481.jpg	[{'emotion': 'Excitement', 'intensity': '4', 'reason': 'this issue is well overdone and needs to be addressed'}, {'emotion': 'Sadness', 'intensity': '3', 'reason': "It's tragic that it is the case, but I do agree."}, {'emotion': 'Excitement', 'intensity': '3', 'reason': 'Because I feel like its the right thing to do.'}, {'emotion': 'Contentment', 'intensity': '4', 'reason': 'these are issues we n…
48	Bank of America to Stop Financing Makers of Military-Style Guns	anonymous-source/all_shooting_images_newest/10755.jpg	[{'emotion': 'Contentment', 'intensity': '2', 'reason': 'that is their decision to make'}, {'emotion': 'Contentment', 'intensity': '4', 'reason': 'I support the defunding of Military-Style Guns'}, {'emotion': 'Contentment', 'intensity': '3', 'reason': 'I feel like they are doing the right thing'}, {'emotion': 'Contentment', 'intensity': '3', 'reason': 'it confuses me when big corporations get pol…
51	After He Subdued a Shooting Suspect, an Armed, Black Security Guard Is Killed by Responding Police	anonymous-source/all_shooting_images_newest/110361.jpg	[{'emotion': 'Anger', 'intensity': '3', 'reason': 'yet again the police kill an innocent person'}, {'emotion': 'Disgust', 'intensity': '4', 'reason': 'absolutely appalled at how this could happen.'}, {'emotion': 'Anger', 'intensity': '3', 'reason': 'I think the police I controlled by the stereotype. Also I think its a racist issue'}, {'emotion': 'Anger', 'intensity': '4', 'reason': 'that should n…
56	Police change explanation again after killing black man they mistook for an active shooter	anonymous-source/all_shooting_images_newest/110502.jpg	[{'emotion': 'Disgust', 'intensity': '4', 'reason': 'why do cops continualy kill innocent people'}, {'emotion': 'Disgust', 'intensity': '4', 'reason': 'there is no excuse'}, {'emotion': 'Anger', 'intensity': '3', 'reason': "I feel like police aren't feeling regret after multiple events like that happened"}, {'emotion': 'Disgust', 'intensity': '5', 'reason': 'this should never happen'}, {'emotion'…
63	Trump's school safety commission would prefer if you didn't talk about gun control	anonymous-source/all_shooting_images_newest/278.jpg	[{'emotion': 'Excitement', 'intensity': '1', 'reason': 'not sure what happened '}, {'emotion': 'Anger', 'intensity': '4', 'reason': "don't talk about it doesn't means it's not an issue."}, {'emotion': 'Anger', 'intensity': '3', 'reason': 'this cannot solve the problem from the source'}, {'emotion': 'Fear', 'intensity': '3', 'reason': 'I do not like it '}, {'emotion': 'Anger', 'intensity': '5', 'r…
64	Pittsburgh shooting: Trump says synagogue attack has little to do with gun laws	anonymous-source/all_shooting_images_newest/100272.jpg	[{'emotion': 'Sadness', 'intensity': '3', 'reason': 'not quite believe it '}, {'emotion': 'Disgust', 'intensity': '5', 'reason': 'It has everything to do with gun laws.'}, {'emotion': 'Disgust', 'intensity': '5', 'reason': 'sure it doesnt '}, {'emotion': 'Anger', 'intensity': '3', 'reason': "trump speaks out of his ass and doesn't make sense"}, {'emotion': 'Anger', 'intensity': '5', 'reason': "Th…
67	Doves fly, hundreds form human chain and marquees go dark for 1 year anniversary of Las Vegas shooting	anonymous-source/all_shooting_images_newest/100288.jpg	[{'emotion': 'Excitement', 'intensity': '1', 'reason': 'actually not familiar with the topic '}, {'emotion': 'Excitement', 'intensity': '3', 'reason': "I'm glad that they remind people of what happened."}, {'emotion': 'Sadness', 'intensity': '3', 'reason': 'the trauma lasts'}, {'emotion': 'Sadness', 'intensity': '3', 'reason': 'I do not like it '}, {'emotion': 'Sadness', 'intensity': '4', 'reason…
73	U.S. judge halts release of blueprints for 3-D printed guns	anonymous-source/all_shooting_images_newest/296.jpg	[{'emotion': 'Excitement', 'intensity': '3', 'reason': '3-D printed guns should be avoided. '}, {'emotion': 'Anger', 'intensity': '4', 'reason': 'Why would they release a blueprint for guns? It might cause more gun issues.'}, {'emotion': 'Contentment', 'intensity': '3', 'reason': "there's someone in this Country notice the problem"}, {'emotion': 'Anger', 'intensity': '3', 'reason': 'I do not like…
78	School shootings will scar a generation of students	anonymous-source/all_shooting_images_newest/10732.jpg	[{'emotion': 'Sadness', 'intensity': '3', 'reason': 'students are involved in gun problems as well '}, {'emotion': 'Sadness', 'intensity': '3', 'reason': "I feel sad because it's true. "}, {'emotion': 'Sadness', 'intensity': '5', 'reason': 'the trauma lasts. students should not have experienced these at a very young age'}, {'emotion': 'Sadness', 'intensity': '3', 'reason': 'I do not like it '}, {…
81	Kroger shooting in Kentucky is being investigated as a hate crime	anonymous-source/all_shooting_images_newest/100460.jpg	[{'emotion': 'Contentment', 'intensity': '1', 'reason': 'It happens a lot'}, {'emotion': 'Sadness', 'intensity': '3', 'reason': 'shot others because of hate'}, {'emotion': 'Disgust', 'intensity': '3', 'reason': "anything involving hate crimes is terrible. I don't get how some people can be filled with so much hate."}, {'emotion': 'Sadness', 'intensity': '3', 'reason': "it's tragic that it occurre…
91	California bar massacre leaves another American community reeling after 12 gunned down by Marine veteran	anonymous-source/all_shooting_images_newest/110043.jpg	[{'emotion': 'Awe', 'intensity': '1', 'reason': 'Its shocking that someone can do this'}, {'emotion': 'Excitement', 'intensity': '3', 'reason': 'gun problem is being paid more attention '}, {'emotion': 'Sadness', 'intensity': '4', 'reason': 'many of our veterans come home without good support and I feel like we can and should be doing a better job at taking care of our veterans. Especially those …
104	Gun manufacturer waited months to warn the public its pistol could fire when dropped	anonymous-source/all_shooting_images_newest/10354.jpg	[{'emotion': 'Fear', 'intensity': '3', 'reason': 'actually no special feelings'}, {'emotion': 'Fear', 'intensity': '4', 'reason': 'a lot of people would be exposed to life danger without noticing it. '}, {'emotion': 'Fear', 'intensity': '3', 'reason': 'The gun sounds so dangerous'}, {'emotion': 'Anger', 'intensity': '3', 'reason': "that's very dangerous and puts so many people in danger to not wa…
105	Trump backs effort to improve gun background checks	anonymous-source/all_shooting_images_newest/10106.jpg	[{'emotion': 'Excitement', 'intensity': '2', 'reason': 'actually no special feelings'}, {'emotion': 'Excitement', 'intensity': '4', 'reason': 'it shows that the government is paying more attention to gun problems. '}, {'emotion': 'Contentment', 'intensity': '3', 'reason': 'Gun backgrounds should be check as soon as possible'}, {'emotion': 'Awe', 'intensity': '3', 'reason': "I'm very surprised tha…
106	Las Vegas Shooting: Retired Carpenter Builds New Memorial of 58 Crosses Ahead of Anniversary	anonymous-source/all_shooting_images_newest/90220.jpg	[{'emotion': 'Excitement', 'intensity': '1', 'reason': 'actually no special feelings'}, {'emotion': 'Sadness', 'intensity': '3', 'reason': 'so many people were killed by guns.'}, {'emotion': 'Fear', 'intensity': '3', 'reason': 'there is shooting event'}, {'emotion': 'Sadness', 'intensity': '4', 'reason': "It's so sad that 58 innocent people died because of a tragic mass shooting."}, {'emotion': '…
114	Top Senate Dem admits: No gun control law would have stopped Santa Fe massacre	anonymous-source/all_shooting_images_newest/10385.jpg	[{'emotion': 'Anger', 'intensity': '3', 'reason': 'no special feelings'}, {'emotion': 'Sadness', 'intensity': '3', 'reason': "there's no law can stop gun problem. "}, {'emotion': 'Fear', 'intensity': '5', 'reason': 'No law works means people over Santa Fe will be exposed to violence, which are strict to people living there.'}, {'emotion': 'Fear', 'intensity': '3', 'reason': "Its very scary that e…
116	The Latest: Victim's family marks anniversary of shooting	anonymous-source/all_shooting_images_newest/90248.jpg	[{'emotion': 'Sadness', 'intensity': '3', 'reason': "feel sad about victim's family"}, {'emotion': 'Sadness', 'intensity': '3', 'reason': 'just sad about those people who lost family memebers due to gun shot. '}, {'emotion': 'Sadness', 'intensity': '3', 'reason': 'The anniversary sounds ironic, which make me feel pity on what the family has experienced.'}, {'emotion': 'Sadness', 'intensity': '3',…
119	Tamera Mowry Calls for Gun Control on 'The Real' After Niece Died in Thousand Oaks Shooting	anonymous-source/all_shooting_images_newest/110249.jpg	[{'emotion': 'Sadness', 'intensity': '3', 'reason': 'sorry about the loss first, then feel angry about the violence'}, {'emotion': 'Sadness', 'intensity': '3', 'reason': 'For one more people died from a gunshot, and hope this can bring some changes. '}, {'emotion': 'Contentment', 'intensity': '4', 'reason': 'It is a must to reduce the trauma in the country. Peace should be welcomed instead.'}, {'…
127	Mom: Thanks to active-shooter drills at school, my 4-year-old thought fireworks were gunshots. Enough already.	anonymous-source/all_shooting_images_newest/110494.jpg	[{'emotion': 'Fear', 'intensity': '3', 'reason': '.'}, {'emotion': 'Sadness', 'intensity': '3', 'reason': 'seeing how this affects children at such a young age is so upsetting. Also as a parent knowing things like this do not happen to children who live in other countries makes me question my decision to raise. a family in America, somewhere I am supposed to be proud to call home'}, {'emotion': '…
131	Tragic twist in synagogue shooting where gunman 'wanted all jews to die'	anonymous-source/all_shooting_images_newest/100134.jpg	[{'emotion': 'Disgust', 'intensity': '3', 'reason': '.'}, {'emotion': 'Disgust', 'intensity': '3', 'reason': 'He is mentally ill. Nothing justifies killing innocent people especially not in their place of worship. '}, {'emotion': 'Fear', 'intensity': '4', 'reason': 'deaths '}, {'emotion': 'Anger', 'intensity': '5', 'reason': 'racism is terrifying, even more terrifying with gun'}, {'emotion': 'Ang…
133	New restrictions on gun ownership signed into law by California Gov. Jerry Brown, a Democrat	anonymous-source/all_shooting_images_newest/90326.jpg	[{'emotion': 'Contentment', 'intensity': '3', 'reason': '.'}, {'emotion': 'Contentment', 'intensity': '3', 'reason': 'things are moving in the right direction'}, {'emotion': 'Contentment', 'intensity': '4', 'reason': 'some progress '}, {'emotion': 'Contentment', 'intensity': '3', 'reason': 'finally the legislation improved'}, {'emotion': 'Fear', 'intensity': '3', 'reason': 'Feeling fear when I he…
139	Trump Hotel Event Shooting Threat Probed by Feds: Bloodstained MAGA Hats as Trophies	anonymous-source/all_shooting_images_newest/90051.jpg	[{'emotion': 'Fear', 'intensity': '3', 'reason': '.'}, {'emotion': 'Anger', 'intensity': '3', 'reason': 'you cannot fight violence with violence. '}, {'emotion': 'Disgust', 'intensity': '4', 'reason': 'I dont understand '}, {'emotion': 'Anger', 'intensity': '4', 'reason': 'there are threats with gun because almost everyone can get access to it'}, {'emotion': 'Anger', 'intensity': '3', 'reason': "…
140	Police: San Jose teacher suspected in road rage incident arrested in classroom with loaded gun	anonymous-source/all_shooting_images_newest/69.jpg	[{'emotion': 'Fear', 'intensity': '3', 'reason': 'The kids must have been terrified!'}, {'emotion': 'Fear', 'intensity': '4', 'reason': 'the teacher knows all of the lockdown procedures which would make it easier to get to the children.'}, {'emotion': 'Contentment', 'intensity': '3', 'reason': 'Justice was served'}, {'emotion': 'Fear', 'intensity': '4', 'reason': 'It seems kids are not safe with …
141	New York Today: Survivors of Gun Violence	anonymous-source/all_shooting_images_newest/10428.jpg	[{'emotion': 'Sadness', 'intensity': '3', 'reason': "What's happening in this city is a disaster."}, {'emotion': 'Awe', 'intensity': '4', 'reason': 'I have great respect and compassion for survivors in gun violence'}, {'emotion': 'Sadness', 'intensity': '3', 'reason': 'of the trauma and pain survivors exprienced'}, {'emotion': 'Awe', 'intensity': '1', 'reason': "I actually don't feel anything. Ju…
148	NRA Is Losing Major Sponsors and Partners Amid Calls for a Boycott	anonymous-source/all_shooting_images_newest/10127.jpg	[{'emotion': 'Contentment', 'intensity': '3', 'reason': 'Let NRA die'}, {'emotion': 'Excitement', 'intensity': '4', 'reason': 'The NRA perpetuates violence and should lose its sponsors'}, {'emotion': 'Sadness', 'intensity': '3', 'reason': 'people who work in NRA are going to suffer and not be able to get as much money as before to support themselves and their families'}, {'emotion': 'Contentment'…
152	Trump: I'd have rushed into Florida school during shooting Video	anonymous-source/all_shooting_images_newest/10469.jpg	[{'emotion': 'Awe', 'intensity': '3', 'reason': "He'd better do that"}, {'emotion': 'Disgust', 'intensity': '4', 'reason': 'The only place Donald Trump is running into is a wig shop '}, {'emotion': 'Sadness', 'intensity': '3', 'reason': 'of all the kids hurt in the school shooting'}, {'emotion': 'Amusement', 'intensity': '2', 'reason': 'I really really doubt that'}, {'emotion': 'Awe', 'intensity'…
157	Eiffel Tower goes dark to honor Pittsburgh shooting victims	anonymous-source/all_shooting_images_newest/100494.jpg	[{'emotion': 'Sadness', 'intensity': '3', 'reason': 'I feel sorry for the tragedy'}, {'emotion': 'Contentment', 'intensity': '4', 'reason': 'The display of unity is touching '}, {'emotion': 'Sadness', 'intensity': '3', 'reason': 'of people killed'}, {'emotion': 'Awe', 'intensity': '2', 'reason': 'Human compassion is universal and touching'}, {'emotion': 'Sadness', 'intensity': '3', 'reason': 'I f…
159	Church gunman's wife says he cuffed her to bed, said he'd be 'right back' before rampage	anonymous-source/all_shooting_images_newest/99.jpg	[{'emotion': 'Disgust', 'intensity': '3', 'reason': 'This man is worse than a animal.'}, {'emotion': 'Fear', 'intensity': '4', 'reason': 'such a scary situation '}, {'emotion': 'Fear', 'intensity': '3', 'reason': 'of the terror that wife faced'}, {'emotion': 'Fear', 'intensity': '5', 'reason': 'That is crazy scary to think about.....'}, {'emotion': 'Disgust', 'intensity': '3', 'reason': 'This man…
164	Senators want Facebook, Google to block access to 3D printed gun files	anonymous-source/all_shooting_images_newest/320.jpg	[{'emotion': 'Excitement', 'intensity': '4', 'reason': 'They should block them.'}, {'emotion': 'Excitement', 'intensity': '1', 'reason': 'yes, yes they should'}, {'emotion': 'Contentment', 'intensity': '3', 'reason': 'i understnad why they want this'}, {'emotion': 'Contentment', 'intensity': '2', 'reason': 'I am not sure what they are saying or what this means, I would have to read on to find out…
165	Klansman gets 4 years for firing gun at 'Unite the Right' rally	anonymous-source/all_shooting_images_newest/274.jpg	[{'emotion': 'Contentment', 'intensity': '5', 'reason': 'He deserves it.'}, {'emotion': 'Fear', 'intensity': '2', 'reason': 'yes he should, its a bit disgusting that it could ever been seen as acceptable '}, {'emotion': 'Fear', 'intensity': '3', 'reason': 'the fact that there are still klansman in this world is very scary'}, {'emotion': 'Fear', 'intensity': '4', 'reason': 'only 4 years for attemp…
166	US military adds more than 4,000 names to gun background check database after Texas mass shooting	anonymous-source/all_shooting_images_newest/10461.jpg	[{'emotion': 'Contentment', 'intensity': '5', 'reason': 'More background checks are needed.'}, {'emotion': 'Sadness', 'intensity': '2', 'reason': 'good, it should be more robust anyway'}, {'emotion': 'Contentment', 'intensity': '3', 'reason': 'they are finally doing whats right'}, {'emotion': 'Contentment', 'intensity': '4', 'reason': 'Happy to see action being taken even in the most conservative…
168	White House weighs video game link to gun violence	anonymous-source/all_shooting_images_newest/10136.jpg	[{'emotion': 'Anger', 'intensity': '5', 'reason': 'It has been proven there is little to no link. '}, {'emotion': 'Disgust', 'intensity': '4', 'reason': 'whatever, there are so many studies saying that is not the case stop blaming anything but your own legislation'}, {'emotion': 'Contentment', 'intensity': '2', 'reason': 'i need more information on this matter'}, {'emotion': 'Contentment', 'inten…
170	Pittsburgh synagogue shooting suspect indicted on federal hate crime charges, faces 535 years	anonymous-source/all_shooting_images_newest/110518.jpg	[{'emotion': 'Contentment', 'intensity': '5', 'reason': 'He deserves it.'}, {'emotion': 'Excitement', 'intensity': '4', 'reason': 'he deserves it '}, {'emotion': 'Sadness', 'intensity': '3', 'reason': 'the event was tragic and he deserved what he got'}, {'emotion': 'Contentment', 'intensity': '4', 'reason': 'This person should not have the right to freedom again, they are a danger to society. '},…
171	Watch Donald Trump, Marco Rubio, and Rick Scott Address the NRA	anonymous-source/all_shooting_images_newest/10027.jpg	[{'emotion': 'Anger', 'intensity': '1', 'reason': 'How are they addressing it?'}, {'emotion': 'Disgust', 'intensity': '5', 'reason': "no thanks a bunch of NRA sponsored idiots addressing other people's lives like they dont matter no thanks "}, {'emotion': 'Contentment', 'intensity': '3', 'reason': 'more information needs to be given to make a informed feeling'}, {'emotion': 'Disgust', 'intensity'…
172	Donald Trump Jr. Uses YouTube Shooting To Make Incoherent Rant About The Left	anonymous-source/all_shooting_images_newest/10828.jpg	[{'emotion': 'Anger', 'intensity': '5', 'reason': 'He will use any opportunity to blame things on the left.'}, {'emotion': 'Disgust', 'intensity': '5', 'reason': 'of course he did'}, {'emotion': 'Disgust', 'intensity': '3', 'reason': 'he is an idiot who doesnt know what he is talking about'}, {'emotion': 'Disgust', 'intensity': '3', 'reason': 'Please shut up, no one wants to hear from you, DTJ. '…
175	Rohrabacher s allegiance to the NRA is just another reason not to vote for him	anonymous-source/all_shooting_images_newest/10476.jpg	[{'emotion': 'Contentment', 'intensity': '4', 'reason': 'I agree.'}, {'emotion': 'Amusement', 'intensity': '5', 'reason': 'i mean agreed, but it doesnt change anything '}, {'emotion': 'Contentment', 'intensity': '3', 'reason': 'this is just the opinion of a few people and needs more information'}, {'emotion': 'Contentment', 'intensity': '3', 'reason': 'I agree with this statement. '}, {'emotion':…
177	ShotSpotter, a gunshot detection system, goes live in Calumet City	anonymous-source/all_shooting_images_newest/10141.jpg	[{'emotion': 'Excitement', 'intensity': '4', 'reason': 'I am excited to see if it will work/be beneficial.'}, {'emotion': 'Fear', 'intensity': '3', 'reason': 'what is it and how will it work?'}, {'emotion': 'Contentment', 'intensity': '3', 'reason': 'not enough info in the title need more to form an opinion'}, {'emotion': 'Sadness', 'intensity': '4', 'reason': "Glad to see technology working to h…
185	PayPal bans Gab in wake of Pittsburgh mass shooting	anonymous-source/all_shooting_images_newest/100225.jpg	[{'emotion': 'Contentment', 'intensity': '3', 'reason': 'someone is being held accountable even in the smallest way. '}, {'emotion': 'Contentment', 'intensity': '4', 'reason': 'it is good when companies ban bad things'}, {'emotion': 'Sadness', 'intensity': '3', 'reason': "I don't know what Gab is"}, {'emotion': 'Contentment', 'intensity': '2', 'reason': 'this method can reduce gun violence some w…
195	Muslim groups raise money for victims after Pittsburgh synagogue shooting	anonymous-source/all_shooting_images_newest/100230.jpg	[{'emotion': 'Contentment', 'intensity': '4', 'reason': 'people are coming together to support those affected by such a terribly tragic event. '}, {'emotion': 'Awe', 'intensity': '4', 'reason': "while the situation is so sad, it is great seeing different groups raising money for other group's tragedies"}, {'emotion': 'Contentment', 'intensity': '3', 'reason': "that's an extremely nice thing that …
201	South Carolina lawmaker pulls out loaded gun during constituent meeting, audience says	anonymous-source/all_shooting_images_newest/10381.jpg	[{'emotion': 'Disgust', 'intensity': '4', 'reason': 'There is no reason why a gun should be pulled out at a meeting.'}, {'emotion': 'Fear', 'intensity': '4', 'reason': 'We have put the wrong people in power'}, {'emotion': 'Fear', 'intensity': '4', 'reason': "I can't believe a lawyer would actually do that. Lawyers are taught how to follow the law and should be the ones upholding the law. The fact…
203	Las Vegas gunman became unstable but didn't raise suspicions	anonymous-source/all_shooting_images_newest/116.jpg	[{'emotion': 'Fear', 'intensity': '3', 'reason': 'Mental health issues in America are not addressed well and it shows through the high amounts of unhappy people in the US and those who are mentally unstable enough to do a mass shooting.'}, {'emotion': 'Anger', 'intensity': '4', 'reason': 'How did no one do anything about this?'}, {'emotion': 'Fear', 'intensity': '4', 'reason': 'people who are uns…
205	Florida students turn to activism in wake of shooting	anonymous-source/all_shooting_images_newest/10535.jpg	[{'emotion': 'Awe', 'intensity': '3', 'reason': 'The mental fortitude it takes for students to fight for change after surviving a shooting is astounding.'}, {'emotion': 'Awe', 'intensity': '5', 'reason': 'These students are brave and inspiring '}, {'emotion': 'Awe', 'intensity': '4', 'reason': "I'm always impressed when people are able to bounce back after a traumatizing event. A school shooting …
206	Las Vegas shooting: Memorial events mark 1-year anniversary as massacre motive still shrouded in mystery	anonymous-source/all_shooting_images_newest/100424.jpg	[{'emotion': 'Sadness', 'intensity': '3', 'reason': 'of the tragic event that transpired and the victims.'}, {'emotion': 'Sadness', 'intensity': '4', 'reason': 'This was a very upsetting episode '}, {'emotion': 'Sadness', 'intensity': '4', 'reason': 'This event was a huge tragedy and I remember hearing about it for the first time. It makes me sad to know that people can actually do terrible thing…
207	Worried about gun violence, more than 20 Illinois schools install blue emergency boxes that notify police of an active shooter	anonymous-source/all_shooting_images_newest/90355.jpg	[{'emotion': 'Contentment', 'intensity': '3', 'reason': 'I think that is a good way to keep students safe.'}, {'emotion': 'Anger', 'intensity': '3', 'reason': 'They need to change gun laws not install blue lights'}, {'emotion': 'Contentment', 'intensity': '4', 'reason': 'it shows me that people are actively trying to make schools safer in order to prevent further tragedys. With these blue emergen…
211	Doctors rip Santorum for saying students should learn CPR instead of protesting gun violence	anonymous-source/all_shooting_images_newest/10406.jpg	[{'emotion': 'Anger', 'intensity': '3', 'reason': "it's not mutually exclusive. You can learn CPR AND also protest gun violence, but you wouldn't really need CPR if gun violence wasn't a thing."}, {'emotion': 'Contentment', 'intensity': '4', 'reason': 'Santorum deserves to be ripped a new one '}, {'emotion': 'Contentment', 'intensity': '3', 'reason': "I believe protesting is useful and it's part …
213	Harwood Heights police conduct active shooter drill at Eisenhower library: 'You have to have a plan'	anonymous-source/all_shooting_images_newest/127.jpg	[{'emotion': 'Sadness', 'intensity': '3', 'reason': "it's sad that we even have to do these drills. It shows how prevalent shootings are."}, {'emotion': 'Sadness', 'intensity': '4', 'reason': "This shouldn't be reality "}, {'emotion': 'Contentment', 'intensity': '4', 'reason': 'I completely agree and I think that any large public building needs to have a plan in case of an active shooter. We live…
214	America s easy access to guns is enabling all these mass shootings	anonymous-source/all_shooting_images_newest/110145.jpg	[{'emotion': 'Fear', 'intensity': '3', 'reason': "I agree, and it makes me fearful that there aren't further gun regulations."}, {'emotion': 'Contentment', 'intensity': '5', 'reason': 'I concur '}, {'emotion': 'Sadness', 'intensity': '3', 'reason': "It's sad but kind of true. I believe that there are places where it can be hard to get guns, but then again there are many ways in which it is very e…
217	School shooting threats, even when no guns are fired, can heighten anxiety among students	anonymous-source/all_shooting_images_newest/100349.jpg	[{'emotion': 'Sadness', 'intensity': '3', 'reason': 'that is just a sad reality that students face in this world.'}, {'emotion': 'Contentment', 'intensity': '5', 'reason': 'Obviously '}, {'emotion': 'Sadness', 'intensity': '4', 'reason': "I think this is completely true. Pretty much anyone in the world would get nervous around a school shooting threat. There have been so many and it has all been …
219	Son Of Witness: Suspect In Fatal Kroger Shooting Said 'Whites Don't Kill Whites'	anonymous-source/all_shooting_images_newest/100236.jpg	[{'emotion': 'Disgust', 'intensity': '3', 'reason': "It implies whites don't kill whites, they kill other races and ethnicities"}, {'emotion': 'Anger', 'intensity': '4', 'reason': 'thats racist'}, {'emotion': 'Anger', 'intensity': '5', 'reason': 'Deadly racism '}, {'emotion': 'Disgust', 'intensity': '4', 'reason': "it's just not true."}, {'emotion': 'Anger', 'intensity': '2', 'reason': 'The title…
221	The Latest: Trump postpones Penn. rally after shooting	anonymous-source/all_shooting_images_newest/10654.jpg	[{'emotion': 'Fear', 'intensity': '3', 'reason': 'The shooting is sad, but Trump moving his rally does not matter at all to me.'}, {'emotion': 'Anger', 'intensity': '4', 'reason': "I really just don't like trump"}, {'emotion': 'Contentment', 'intensity': '3', 'reason': "that's necessary "}, {'emotion': 'Contentment', 'intensity': '2', 'reason': "it should be this way, but the fact that it's surpr…
228	Cincinnati Reds to hold Moment of Silence for Fifth Third Center shooting victims	anonymous-source/all_shooting_images_newest/90452.jpg	[{'emotion': 'Contentment', 'intensity': '3', 'reason': 'I am happy they are paying respect to the lost victims of this shooting.'}, {'emotion': 'Sadness', 'intensity': '4', 'reason': 'because people were hurt or killed in a shooting'}, {'emotion': 'Sadness', 'intensity': '3', 'reason': 'A sad scene. '}, {'emotion': 'Sadness', 'intensity': '3', 'reason': "shootings are so often now this isn't eve…
235	Gays Against Guns claims victory as FedEx ends NRA discount	anonymous-source/all_shooting_images_newest/100338.jpg	[{'emotion': 'Contentment', 'intensity': '4', 'reason': 'FedEx no longer associates with a org. like the NRA'}, {'emotion': 'Excitement', 'intensity': '4', 'reason': 'because i hate the nra '}, {'emotion': 'Amusement', 'intensity': '2', 'reason': 'wanna know more about the battle '}, {'emotion': 'Excitement', 'intensity': '3', 'reason': "companies should be making statements like ending partnersh…
236	Waffle House shooting illustrates the danger posed by gun-free zones	anonymous-source/all_shooting_images_newest/10708.jpg	[{'emotion': 'Anger', 'intensity': '4', 'reason': 'Headlines like this usually come from a anti-gun control writer and are biased.'}, {'emotion': 'Anger', 'intensity': '4', 'reason': 'shootings make me angry'}, {'emotion': 'Excitement', 'intensity': '2', 'reason': 'can wait to see the op-ed '}, {'emotion': 'Fear', 'intensity': '4', 'reason': 'why is there a shooting in a gun-free zone.'}, {'emoti…
238	Disturbing as hell': NRA slammed for giving 'Thomas & Friends' characters a KKK makeover	anonymous-source/all_shooting_images_newest/90470.jpg	[{'emotion': 'Disgust', 'intensity': '5', 'reason': "The NRA is defacing a literal children's cartoon."}, {'emotion': 'Disgust', 'intensity': '5', 'reason': 'I hate racism, the kkk, and the nra'}, {'emotion': 'Amusement', 'intensity': '3', 'reason': 'what a clown '}, {'emotion': 'Disgust', 'intensity': '4', 'reason': 'how is this even a thing that is happening in these times.'}, {'emotion': 'Amus…
239	3-D Printed Gun Blueprints Are Back, and Only New Laws Can Stop Them	anonymous-source/all_shooting_images_newest/299.jpg	[{'emotion': 'Fear', 'intensity': '3', 'reason': '3D printed guns could be on the rise.'}, {'emotion': 'Anger', 'intensity': '4', 'reason': 'i want these to stop '}, {'emotion': 'Fear', 'intensity': '2', 'reason': 'Only new laws can stop them make them threatening to the public health now'}, {'emotion': 'Fear', 'intensity': '5', 'reason': "Everyone around me probably had a gun, but I didn't, so t…
240	Left brings campaign against gun-makers to Wall Street	anonymous-source/all_shooting_images_newest/10096.jpg	[{'emotion': 'Excitement', 'intensity': '4', 'reason': 'I agree with this campaign.'}, {'emotion': 'Contentment', 'intensity': '4', 'reason': 'some progress on the ban '}, {'emotion': 'Sadness', 'intensity': '2', 'reason': 'The protests may disrupt Wall Street '}, {'emotion': 'Excitement', 'intensity': '5', 'reason': 'School shootings have been a big problem. The careful young man found the probl…
245	Teachers who survived shootings at Columbine, Sandy Hook, and Rancho Tehama discuss going back into the classroom.	anonymous-source/all_shooting_images_newest/90037.jpg	[{'emotion': 'Excitement', 'intensity': '5', 'reason': 'I am happy to see them getting back into work.'}, {'emotion': 'Sadness', 'intensity': '4', 'reason': 'feel sad about what they went through '}, {'emotion': 'Awe', 'intensity': '4', 'reason': 'It must be traumatizing to survive shootings'}, {'emotion': 'Contentment', 'intensity': '4', 'reason': 'He has no sympathy for the victims, so quitting…
247	Full Panel: Students' gun march will test strength of movement	anonymous-source/all_shooting_images_newest/10322.jpg	[{'emotion': 'Excitement', 'intensity': '3', 'reason': 'I want to see how far this movement can go.'}, {'emotion': 'Contentment', 'intensity': '4', 'reason': 'I support them'}, {'emotion': 'Excitement', 'intensity': '2', 'reason': 'I want to see how is the result'}, {'emotion': 'Fear', 'intensity': '4', 'reason': 'It is a horror that elementary school children can have handguns and carry them to …
254	Students rally for action on guns outside US Capitol	anonymous-source/all_shooting_images_newest/10083.jpg	[{'emotion': 'Excitement', 'intensity': '5', 'reason': 'I support this movement.'}, {'emotion': 'Excitement', 'intensity': '4', 'reason': "I think it's the right action "}, {'emotion': 'Awe', 'intensity': '4', 'reason': 'Students are fighting for safety.'}, {'emotion': 'Fear', 'intensity': '4', 'reason': "I'm worried about the safety of society."}, {'emotion': 'Awe', 'intensity': '4', 'reason': '…
255	How We Mourned' memorializes Las Vegas mass shooting	anonymous-source/all_shooting_images_newest/90038.jpg	[{'emotion': 'Sadness', 'intensity': '3', 'reason': 'The Las Vegas shooting was a tragedy.'}, {'emotion': 'Sadness', 'intensity': '3', 'reason': 'feel bad about the victims '}, {'emotion': 'Sadness', 'intensity': '4', 'reason': 'Because innocent people were killed in the shooting.'}, {'emotion': 'Fear', 'intensity': '4', 'reason': "People shouldn't have guns when they're young."}, {'emotion': 'Sa…
256	Alabama mall shooting: Police admit they killed innocent black man by mistake as true Thanksgiving gunman remains at large	anonymous-source/all_shooting_images_newest/110505.jpg	[{'emotion': 'Disgust', 'intensity': '5', 'reason': 'Things like this happen all the time to black people.'}, {'emotion': 'Anger', 'intensity': '4', 'reason': "I think the police's action was really bad "}, {'emotion': 'Anger', 'intensity': '2', 'reason': 'Policemen apologize for killing a human life.'}, {'emotion': 'Anger', 'intensity': '4', 'reason': 'I am outraged by this gratuitous racial dis…
258	Kanye West donates $150,000 to family of black security guard killed by police after stopping gunman: report | TheHill	anonymous-source/all_shooting_images_newest/110137.jpg	[{'emotion': 'Contentment', 'intensity': '5', 'reason': 'Happy to see his family being supported after their loss.'}, {'emotion': 'Sadness', 'intensity': '4', 'reason': "I feel so bad about the black security guard's experience "}, {'emotion': 'Contentment', 'intensity': '4', 'reason': 'A public figure is making an effort to support the family in needed.'}, {'emotion': 'Fear', 'intensity': '4', '…
261	Donald Trump Addresses Florida Shooting, Rejects Response That Just Makes Us Feel Better	anonymous-source/all_shooting_images_newest/10765.jpg	[{'emotion': 'Contentment', 'intensity': '3', 'reason': 'Im happy that Trump addressed the shooting and is paying respect to those who were killed or hurt.'}, {'emotion': 'Contentment', 'intensity': '3', 'reason': 'I am content because of his attitudes '}, {'emotion': 'Disgust', 'intensity': '1', 'reason': "I don't care what this man has to say"}, {'emotion': 'Anger', 'intensity': '4', 'reason': …
270	The World Moves On And You Don t. Parents Who Lost Children in School Shootings Find Comfort in a Group No One Wants to Join	anonymous-source/all_shooting_images_newest/110437.jpg	[{'emotion': 'Sadness', 'intensity': '3', 'reason': 'Its sad to think of the pain that parents face after their children are killed'}, {'emotion': 'Sadness', 'intensity': '3', 'reason': 'Narratives make me empathy'}, {'emotion': 'Sadness', 'intensity': '3', 'reason': 'sad to lose a kid'}, {'emotion': 'Awe', 'intensity': '4', 'reason': 'Such tragedy bringing people together makes me grateful for w…
282	Sen. Nybo urges Gov. Rauner to sign SB 337, gun dealer licensure bill	anonymous-source/all_shooting_images_newest/90347.jpg	[{'emotion': 'Fear', 'intensity': '4', 'reason': 'Maybe many people will die one day because of this.'}, {'emotion': 'Contentment', 'intensity': '3', 'reason': 'not much to say'}, {'emotion': 'Contentment', 'intensity': '3', 'reason': 'A licensure bill may be helpful in gun control.'}, {'emotion': 'Contentment', 'intensity': '3', 'reason': "Don't understand what this news what to talk about"}, {'…
286	When the Second Amendment threatens the First, mass shootings are more likely	anonymous-source/all_shooting_images_newest/10155.jpg	[{'emotion': 'Fear', 'intensity': '3', 'reason': "It will aggravate people's anxiety about the proliferation of guns."}, {'emotion': 'Awe', 'intensity': '3', 'reason': 'taken aback'}, {'emotion': 'Fear', 'intensity': '3', 'reason': 'I am afraid of mass shootings.'}, {'emotion': 'Fear', 'intensity': '3', 'reason': 'You always can tell which person will become shooter because they usually looks lik…
290	Looking back at the Las Vegas mass shooting Photos	anonymous-source/all_shooting_images_newest/100284.jpg	[{'emotion': 'Fear', 'intensity': '4', 'reason': 'Death is terrifying for normal people.'}, {'emotion': 'Fear', 'intensity': '3', 'reason': 'guns are sketchy'}, {'emotion': 'Fear', 'intensity': '3', 'reason': 'I am afraid of seeing these photos.'}, {'emotion': 'Sadness', 'intensity': '4', 'reason': 'Willing to hear about the victim tell about the story and I can imagine the tragic situation'}, {'…
291	Bloomberg's claims on gun control fail to match the facts	anonymous-source/all_shooting_images_newest/10624.jpg	[{'emotion': 'Sadness', 'intensity': '4', 'reason': "It will aggravate people's anxiety about the proliferation of guns."}, {'emotion': 'Contentment', 'intensity': '3', 'reason': 'not sure'}, {'emotion': 'Anger', 'intensity': '3', 'reason': 'His claims did not match the facts.'}, {'emotion': 'Sadness', 'intensity': '2', 'reason': "Don't know what Trump‘s current position is"}, {'emotion': 'Sadnes…
292	Santa Fe High School Shooting Victim s Mother Confronts Ted Cruz at Town Hall: Don t Disrespect My Daughter	anonymous-source/all_shooting_images_newest/90369.jpg	[{'emotion': 'Sadness', 'intensity': '4', 'reason': 'I feel so sorry for the victims...'}, {'emotion': 'Sadness', 'intensity': '3', 'reason': 'it was sad'}, {'emotion': 'Sadness', 'intensity': '4', 'reason': "Her mother is pitiful. I can't imagine how does she feel."}, {'emotion': 'Contentment', 'intensity': '3', 'reason': "Don't understand the meaning of this news"}, {'emotion': 'Contentment', '…
299	Hate crime considered in Kentucky grocery shooting	anonymous-source/all_shooting_images_newest/100087.jpg	[{'emotion': 'Fear', 'intensity': '3', 'reason': "It will aggravate people's fear of gun violence."}, {'emotion': 'Fear', 'intensity': '4', 'reason': 'The headline shows the link between gun violoence and hate crime.'}, {'emotion': 'Fear', 'intensity': '3', 'reason': "It will aggravate people's fear of gun violence."}, {'emotion': 'Fear', 'intensity': '2', 'reason': 'I could also be the victim of…
300	Tense moments as community meets after funeral ambush: 'Your church has had many shootings'	anonymous-source/all_shooting_images_newest/100135.jpg	[{'emotion': 'Fear', 'intensity': '3', 'reason': "It will aggravate people's fear of gun violence."}, {'emotion': 'Fear', 'intensity': '4', 'reason': 'It shows that this is not a random act. It’s more likely to be premeditated.'}, {'emotion': 'Fear', 'intensity': '3', 'reason': "It will aggravate people's fear of gun violence."}, {'emotion': 'Fear', 'intensity': '2', 'reason': 'even places that s…
302	California governor signs gun control bills into law	anonymous-source/all_shooting_images_newest/90335.jpg	[{'emotion': 'Fear', 'intensity': '3', 'reason': "It will aggravate people's fear of gun violence."}, {'emotion': 'Contentment', 'intensity': '4', 'reason': 'I feel that the new law may create a safer environment.'}, {'emotion': 'Fear', 'intensity': '3', 'reason': "It will aggravate people's fear of gun violence."}, {'emotion': 'Excitement', 'intensity': '1', 'reason': 'depending on the exact bil…
303	NYPD deploys officers to religious centers after Pittsburgh shooting	anonymous-source/all_shooting_images_newest/100420.jpg	[{'emotion': 'Sadness', 'intensity': '4', 'reason': "It will aggravate people's fear of gun violence."}, {'emotion': 'Sadness', 'intensity': '3', 'reason': 'It implies that shooting caused injuries.'}, {'emotion': 'Sadness', 'intensity': '4', 'reason': "It will aggravate people's fear of gun violence."}, {'emotion': 'Fear', 'intensity': '2', 'reason': 'different religious organizations feel under…
323	Officials across the country fear a new era of untraceable firearms	anonymous-source/all_shooting_images_newest/21.jpg	[{'emotion': 'Fear', 'intensity': '3', 'reason': 'sounds dangerous '}, {'emotion': 'Disgust', 'intensity': '5', 'reason': 'its completely changable but no capitalism fucks all of us '}, {'emotion': 'Fear', 'intensity': '4', 'reason': 'The last thing we need is untraceable firearms when we are already struggling as-is. '}, {'emotion': 'Fear', 'intensity': '4', 'reason': 'That even government offic…
324	Small gun shop that sold weapon to alleged Florida high school shooter 'closes indefinitely'	anonymous-source/all_shooting_images_newest/10087.jpg	[{'emotion': 'Fear', 'intensity': '3', 'reason': 'sounds dangerous '}, {'emotion': 'Amusement', 'intensity': '3', 'reason': 'good it deserves to '}, {'emotion': 'Fear', 'intensity': '4', 'reason': 'How easy it is to get around American gun laws '}, {'emotion': 'Contentment', 'intensity': '5', 'reason': 'It is not appropriate for high school students to own their guns, so it is right not to sell t…
325	Republican who called Florida shooting survivor a 'skinhead lesbian' quits Maine race	anonymous-source/all_shooting_images_newest/10514.jpg	[{'emotion': 'Anger', 'intensity': '3', 'reason': 'wrong words to be spoken '}, {'emotion': 'Disgust', 'intensity': '4', 'reason': 'A) that dude is disgusting B) good he shouldnt be a part of society '}, {'emotion': 'Contentment', 'intensity': '3', 'reason': 'That is an incredibly offensive statement and they should remove themselves from the public eye for that reason '}, {'emotion': 'Contentmen…
327	Alabama elementary school student brings gun to school, shoots himself in hand: police	anonymous-source/all_shooting_images_newest/90146.jpg	[{'emotion': 'Fear', 'intensity': '3', 'reason': 'sad story'}, {'emotion': 'Sadness', 'intensity': '4', 'reason': 'wow. guns really dont help do they, that poor child '}, {'emotion': 'Fear', 'intensity': '5', 'reason': 'How did this happen? Why was this able to happen? Alabama should be annexed. '}, {'emotion': 'Fear', 'intensity': '4', 'reason': 'It is a horror that elementary school children ca…
336	Police: Pittsburgh synagogue gunman said 'I just want to kill Jews'	anonymous-source/all_shooting_images_newest/100401.jpg	[{'emotion': 'Anger', 'intensity': '3', 'reason': "a powerful quote that stimulates readers' emotions. feeling angry "}, {'emotion': 'Disgust', 'intensity': '4', 'reason': 'so antisemitism it is '}, {'emotion': 'Fear', 'intensity': '5', 'reason': 'Where is he getting these ideas? And how pervasive is this ideology today? '}, {'emotion': 'Anger', 'intensity': '4', 'reason': 'I am outraged by this …
337	Parkland survivor details her experience during shooting at Kavanaugh hearing	anonymous-source/all_shooting_images_newest/90149.jpg	[{'emotion': 'Sadness', 'intensity': '3', 'reason': 'painful memory for victim '}, {'emotion': 'Contentment', 'intensity': '5', 'reason': 'thats very brave of her and she shouldnt have to to make a point'}, {'emotion': 'Awe', 'intensity': '5', 'reason': 'That is a brave thing to do, gives me hope '}, {'emotion': 'Sadness', 'intensity': '4', 'reason': 'I feel sad for the victim.'}, {'emotion': 'Sa…
338	Country Star Jason Aldean Wades Into Gun Control Debate, Says Weapons Are 'Too Easy to Get'	anonymous-source/all_shooting_images_newest/10836.jpg	[{'emotion': 'Contentment', 'intensity': '3', 'reason': 'agree on the quote '}, {'emotion': 'Contentment', 'intensity': '5', 'reason': 'yes yes they are'}, {'emotion': 'Contentment', 'intensity': '4', 'reason': 'Happy to see those with influence over conservatives making sense '}, {'emotion': 'Fear', 'intensity': '4', 'reason': 'I agree with the view that guns are easily obtained and that this pr…
339	Exclusive: Group chat messages show school shooter obsessed with race, violence and guns	anonymous-source/all_shooting_images_newest/10156.jpg	[{'emotion': 'Fear', 'intensity': '4', 'reason': "it's scary to see how obsessive one can become when planning to become a school shooter"}, {'emotion': 'Disgust', 'intensity': '4', 'reason': 'its disgusting that people think this way'}, {'emotion': 'Anger', 'intensity': '5', 'reason': 'gun violence gives racists a way to eliminate the groups they are prejudiced against'}, {'emotion': 'Disgust', …
343	Florida lawmakers pass bill that would allow school staff to carry guns	anonymous-source/all_shooting_images_newest/10093.jpg	[{'emotion': 'Disgust', 'intensity': '5', 'reason': "It's more unsafe for them to carry weapons as they can use them when not necessary and the kids have an easy chance of getting it in their possession "}, {'emotion': 'Fear', 'intensity': '2', 'reason': 'i do not envision this ending well'}, {'emotion': 'Fear', 'intensity': '5', 'reason': 'imagine being in school and your teachers having guns'},…
344	California already had the strictest gun control laws in the nation. They just passed a bunch more	anonymous-source/all_shooting_images_newest/100027.jpg	[{'emotion': 'Contentment', 'intensity': '5', 'reason': 'I am completely on board with passing more laws to help save more lives'}, {'emotion': 'Excitement', 'intensity': '4', 'reason': 'change is happening'}, {'emotion': 'Excitement', 'intensity': '4', 'reason': 'California is making the right steps towards a safer society'}, {'emotion': 'Contentment', 'intensity': '3', 'reason': 'All the bad ne…
345	After A Call To Action From Student Emma Gonzalez, Florida Activists Take On Gun Laws	anonymous-source/all_shooting_images_newest/10369.jpg	[{'emotion': 'Contentment', 'intensity': '5', 'reason': "it's good to see people taking action"}, {'emotion': 'Excitement', 'intensity': '4', 'reason': 'change is occuring'}, {'emotion': 'Excitement', 'intensity': '4', 'reason': 'I believe there is hope for our society when I read things like this'}, {'emotion': 'Excitement', 'intensity': '3', 'reason': 'All the bad news about gun violence makes …
349	Lawyers call US gun charges for Mexican man 'vindictive'	anonymous-source/all_shooting_images_newest/10207.jpg	[{'emotion': 'Sadness', 'intensity': '3', 'reason': "don't quite understand the headline."}, {'emotion': 'Sadness', 'intensity': '2', 'reason': 'this is a saddening situation that a gun related conviction is vindictive'}, {'emotion': 'Disgust', 'intensity': '4', 'reason': 'the way this headline is worded makes me feel weird and like they are focusing on the fact that this man is Mexican'}, {'emot…
350	Kendall residents concerned over proposed changes that would relax rules for outdoor shooting ranges	anonymous-source/all_shooting_images_newest/90259.jpg	[{'emotion': 'Fear', 'intensity': '3', 'reason': 'I feel this could lead to some more violence and "accidents" to occur'}, {'emotion': 'Fear', 'intensity': '4', 'reason': 'something is bound to happen if this occurs'}, {'emotion': 'Fear', 'intensity': '4', 'reason': 'Outdoor shooting ranges could hurt many people'}, {'emotion': 'Sadness', 'intensity': '3', 'reason': 'All the bad news about gun vi…
353	Nashville mayor demands stricter gun control after Waffle House shooting	anonymous-source/all_shooting_images_newest/10122.jpg	[{'emotion': 'Contentment', 'intensity': '4', 'reason': "it's good to see more strict gun control coming into place"}, {'emotion': 'Excitement', 'intensity': '4', 'reason': 'change is happening but it took this to make change'}, {'emotion': 'Contentment', 'intensity': '4', 'reason': 'stricter gun control laws are better'}, {'emotion': 'Contentment', 'intensity': '3', 'reason': 'All the bad news a…
357	Poll: most US teens are worried that a shooting could happen at their school	anonymous-source/all_shooting_images_newest/10820.jpg	[{'emotion': 'Sadness', 'intensity': '5', 'reason': 'children should not have to be scared just going to school or even leaving their house. '}, {'emotion': 'Sadness', 'intensity': '4', 'reason': 'this shouldnt be true'}, {'emotion': 'Sadness', 'intensity': '5', 'reason': 'As a teenager, it is so sad that kids this young have to be worried about that'}, {'emotion': 'Amusement', 'intensity': '3', …
359	Man allegedly threatened to shoot up polling place, said he was promised a gun to vote straight party	anonymous-source/all_shooting_images_newest/110411.jpg	[{'emotion': 'Fear', 'intensity': '5', 'reason': 'threats are not funny'}, {'emotion': 'Fear', 'intensity': '2', 'reason': 'I personally do not support private guns, so I feel very scared of such news.'}, {'emotion': 'Disgust', 'intensity': '5', 'reason': 'This is dumb news'}, {'emotion': 'Disgust', 'intensity': '4', 'reason': 'this is an extreme violation of pluralism and our democracy.'}, {'emo…
362	Pelosi meets with Parkland students and parents, says gun control would be atop Dems agenda	anonymous-source/all_shooting_images_newest/100214.jpg	[{'emotion': 'Contentment', 'intensity': '1', 'reason': "that's politician's job to protect citizens, why should we celebrate when that's what they should do"}, {'emotion': 'Contentment', 'intensity': '4', 'reason': 'I personally do not support private guns.'}, {'emotion': 'Awe', 'intensity': '3', 'reason': 'Was it though?'}, {'emotion': 'Sadness', 'intensity': '4', 'reason': "even though this wa…
365	Guns found at 2 schools, threats reported at 3 schools near Santa Fe High School on 1st day back after mass shooting	anonymous-source/all_shooting_images_newest/10157.jpg	[{'emotion': 'Fear', 'intensity': '5', 'reason': "I'm very afraid at how rampant it is and how there could be a cult or group planning it"}, {'emotion': 'Anger', 'intensity': '3', 'reason': 'Gun violence is a bad thing.'}, {'emotion': 'Fear', 'intensity': '3', 'reason': 'Did they store the guns there?'}, {'emotion': 'Fear', 'intensity': '4', 'reason': 'it terrifies me that guns are so often found…
369	November 13 12:27 PM Man gets prison for shooting at black teen asking for directions	anonymous-source/all_shooting_images_newest/110427.jpg	[{'emotion': 'Sadness', 'intensity': '5', 'reason': 'I feel so sad for this to happen to an innocent person'}, {'emotion': 'Anger', 'intensity': '5', 'reason': 'Gun violence should be banned.'}, {'emotion': 'Sadness', 'intensity': '3', 'reason': "Why'd he do that"}, {'emotion': 'Anger', 'intensity': '4', 'reason': "it's so scary that these type of shootings happen all the time. But at least he wa…
374	Jacksonville Witness: Gamer Gunman Stared Blankly After Loss	anonymous-source/all_shooting_images_newest/42.jpg	[{'emotion': 'Fear', 'intensity': '4', 'reason': 'the gunman seems like a psychopath and im afraid of the mental issues people like this face since it can have real consequences in harming others'}, {'emotion': 'Sadness', 'intensity': '1', 'reason': 'Not interested.'}, {'emotion': 'Awe', 'intensity': '3', 'reason': 'That was sarcasm. Just touch grass, COD isnt making kids shoot up schools.'}, {'e…
380	More than a year after 9-year-old girl fatally shot during gun safety lesson, her father's case continues	anonymous-source/all_shooting_images_newest/90348.jpg	[{'emotion': 'Sadness', 'intensity': '3', 'reason': 'It is a sad story that the gun control still need to be improved'}, {'emotion': 'Sadness', 'intensity': '3', 'reason': 'It is a sad story that the gun control still need to be improved'}, {'emotion': 'Sadness', 'intensity': '4', 'reason': 'She was so young '}, {'emotion': 'Sadness', 'intensity': '4', 'reason': 'it is saddening to hear about a l…
381	Trump NRA speech: start time and how to watch online	anonymous-source/all_shooting_images_newest/10552.jpg	[{'emotion': 'Contentment', 'intensity': '3', 'reason': 'Can know more about the next step of gun control policy'}, {'emotion': 'Contentment', 'intensity': '3', 'reason': 'Can know more about the next step of gun control policy'}, {'emotion': 'Disgust', 'intensity': '3', 'reason': 'the NRA should not have as much power as it does '}, {'emotion': 'Contentment', 'intensity': '1', 'reason': "This he…
386	Official: Shooter debated sanity online during bar massacre	anonymous-source/all_shooting_images_newest/110274.jpg	[{'emotion': 'Fear', 'intensity': '3', 'reason': 'You always can tell which person will become shooter because they usually looks like normal person'}, {'emotion': 'Fear', 'intensity': '3', 'reason': 'You always can tell which person will become shooter because they usually looks like normal person'}, {'emotion': 'Fear', 'intensity': '4', 'reason': 'what if the shooter gets off because they plead…
388	Sacha Baron Cohen Tricks A Pro-Gun Activist Into Putting A Dildo In His Mouth	anonymous-source/all_shooting_images_newest/317.jpg	[{'emotion': 'Anger', 'intensity': '2', 'reason': 'Disgusting to hear these kinds of news'}, {'emotion': 'Anger', 'intensity': '2', 'reason': 'Disgusting to hear these kinds of news'}, {'emotion': 'Amusement', 'intensity': '4', 'reason': 'that is a funny headline '}, {'emotion': 'Amusement', 'intensity': '5', 'reason': 'this would be a hilarious joke and reaction to see'}, {'emotion': 'Amusement'…
390	I Placed Myself Under His Lifeless Body': Parkland Survivor Details School Shooting Experience At Kavanaugh Hearing	anonymous-source/all_shooting_images_newest/90353.jpg	[{'emotion': 'Sadness', 'intensity': '4', 'reason': 'Willing to hear about the victim tell about the story and I can imagine the tragic situation'}, {'emotion': 'Sadness', 'intensity': '4', 'reason': 'willing to hear about the victim tell about the story and I can imagine the tragic situation'}, {'emotion': 'Sadness', 'intensity': '4', 'reason': 'It is so sad to hear these stories about what peop…
391	Trump's position on guns has not changed, White House says	anonymous-source/all_shooting_images_newest/10560.jpg	[{'emotion': 'Sadness', 'intensity': '2', 'reason': "Don't know what Trump‘s current position is"}, {'emotion': 'Sadness', 'intensity': '2', 'reason': "Don't know what Trump‘s current position is"}, {'emotion': 'Anger', 'intensity': '4', 'reason': 'it is never going to '}, {'emotion': 'Sadness', 'intensity': '1', 'reason': 'it feels like nothing changes, even after major tragedies, which is disap…
395	Florida survivors of school gun massacre to hit the road for arms control	anonymous-source/all_shooting_images_newest/10769.jpg	[{'emotion': 'Contentment', 'intensity': '4', 'reason': 'What they want to do for hit the road? Protest?'}, {'emotion': 'Contentment', 'intensity': '4', 'reason': 'What they want to do for hit the road? Protest?'}, {'emotion': 'Excitement', 'intensity': '4', 'reason': 'I felt hopeful something would happen after parkland '}, {'emotion': 'Excitement', 'intensity': '2', 'reason': 'these survivors c…
397	These 3,100 businesses love the NRA even as others pull back	anonymous-source/all_shooting_images_newest/10711.jpg	[{'emotion': 'Disgust', 'intensity': '3', 'reason': "Don't agree with these businesses who love the NRA"}, {'emotion': 'Disgust', 'intensity': '3', 'reason': "Don't agree with these businesses who love the NRA"}, {'emotion': 'Anger', 'intensity': '4', 'reason': 'there is still a lot of support for the NRA '}, {'emotion': 'Anger', 'intensity': '2', 'reason': 'The NRA are only as powerful as their …
403	Illegal immigrant charged with gun possession tries to claim Second Amendment rights in court	anonymous-source/all_shooting_images_newest/480.jpg	[{'emotion': 'Fear', 'intensity': '3', 'reason': 'It is a illegal for them to hold gun'}, {'emotion': 'Fear', 'intensity': '3', 'reason': "I don't know the background "}, {'emotion': 'Sadness', 'intensity': '2', 'reason': 'I have a strong feeling that the illegal immigrant is going to be repatriated'}, {'emotion': 'Excitement', 'intensity': '3', 'reason': 'Hope can have some good news!'}, {'emoti…
404	Parkland Students Protest in Tallahassee, Raising Political Pressure for Tougher Gun Laws	anonymous-source/all_shooting_images_newest/10054.jpg	[{'emotion': 'Excitement', 'intensity': '4', 'reason': 'Students Protest can change lots of things '}, {'emotion': 'Contentment', 'intensity': '3', 'reason': 'good progress '}, {'emotion': 'Excitement', 'intensity': '4', 'reason': 'Students protest is always exciting'}, {'emotion': 'Sadness', 'intensity': '3', 'reason': 'This is tough and makes me feel hopeless...'}, {'emotion': 'Excitement', 'in…
409	Company selling 3D-printed gun blueprints online despite court injunction	anonymous-source/all_shooting_images_newest/214.jpg	[{'emotion': 'Disgust', 'intensity': '3', 'reason': "It is illegal to produce guns without government's permission"}, {'emotion': 'Anger', 'intensity': '3', 'reason': "I don't agree "}, {'emotion': 'Anger', 'intensity': '3', 'reason': 'They are contributing to the gun problem'}, {'emotion': 'Anger', 'intensity': '4', 'reason': "It will aggravate people's fear of gun violence."}, {'emotion': 'Disg…
418	Garth Brooks Opens CMA Awards With Moment of Silence in Memory of Those Lost in California Shooting	anonymous-source/all_shooting_images_newest/110084.jpg	[{'emotion': 'Awe', 'intensity': '3', 'reason': 'It means he cares about people who lost their lives'}, {'emotion': 'Sadness', 'intensity': '4', 'reason': 'I am sad to hear the situation of victims '}, {'emotion': 'Awe', 'intensity': '2', 'reason': 'Paying tributes to the dead is always awe-inspiring in my opinion'}, {'emotion': 'Sadness', 'intensity': '3', 'reason': "It will aggravate people's f…
421	The Democratic Party s New Litmus Test: Gun Control	anonymous-source/all_shooting_images_newest/197.jpg	[{'emotion': 'Anger', 'intensity': '3', 'reason': 'Gun control becomes another political game that parties can take sides and perform to win votes.'}, {'emotion': 'Contentment', 'intensity': '3', 'reason': 'Headline doesnt say much but could be interesting to read on '}, {'emotion': 'Anger', 'intensity': '4', 'reason': 'no duh it should have been '}, {'emotion': 'Contentment', 'intensity': '3', '…
422	South Dakotans may soon be able to carry concealed handguns without a permit	anonymous-source/all_shooting_images_newest/110208.jpg	[{'emotion': 'Fear', 'intensity': '3', 'reason': 'it might cause unnecessary harm.'}, {'emotion': 'Fear', 'intensity': '4', 'reason': 'We are moving in the wrong direction. No permits?? What the hell. '}, {'emotion': 'Disgust', 'intensity': '4', 'reason': 'yep i live in montana and its sad because life literally doesnt matter to these people'}, {'emotion': 'Disgust', 'intensity': '5', 'reason': '…
425	Pittsburgh leaders, residents split over President Trump s trip to synagogue shooting site	anonymous-source/all_shooting_images_newest/100088.jpg	[{'emotion': 'Sadness', 'intensity': '3', 'reason': 'Donald Trump could have pushed gun control policy more, and he could be partially responsible for the shooting.'}, {'emotion': 'Disgust', 'intensity': '4', 'reason': 'How dare he mourn the loss of these people when he handed the perpetrator the weapon? '}, {'emotion': 'Disgust', 'intensity': '5', 'reason': 'he shouldnt have gone in my opinion b…
427	Tom Steyer, gun safety groups plan voter registration drive for high school students	anonymous-source/all_shooting_images_newest/10519.jpg	[{'emotion': 'Awe', 'intensity': '3', 'reason': 'high school students are the direct victims of school shooting tragedies. '}, {'emotion': 'Awe', 'intensity': '4', 'reason': 'Glad to see smart, strategic action being taken '}, {'emotion': 'Contentment', 'intensity': '5', 'reason': 'good for them they are doing good work'}, {'emotion': 'Excitement', 'intensity': '3', 'reason': 'I think that change…
429	Shopify bans sale of certain firearms, accessories	anonymous-source/all_shooting_images_newest/166.jpg	[{'emotion': 'Contentment', 'intensity': '3', 'reason': 'there is actual action being implemented for gun control.'}, {'emotion': 'Contentment', 'intensity': '3', 'reason': 'I agree with this decision '}, {'emotion': 'Contentment', 'intensity': '5', 'reason': 'i mean good its a start'}, {'emotion': 'Excitement', 'intensity': '3', 'reason': 'This is saying that change is being made and that compan…
430	Trump praises gun rights, bashes Mueller probe in speech to NRA	anonymous-source/all_shooting_images_newest/10203.jpg	[{'emotion': 'Disgust', 'intensity': '3', 'reason': "Trump's pro-gun attitude will result in more shooting incidents."}, {'emotion': 'Disgust', 'intensity': '4', 'reason': "Shut up, Donald. You're an idiot and don't know anything. You're a pundit for your followers with all talk and no action. "}, {'emotion': 'Disgust', 'intensity': '5', 'reason': 'yep thats trump'}, {'emotion': 'Anger', 'intensi…
431	Sacha Baron Cohen pranks former Arizona sheriff Joe Arpaio into debating gun control with a Shopkins toy	anonymous-source/all_shooting_images_newest/199.jpg	[{'emotion': 'Amusement', 'intensity': '3', 'reason': 'It is funny that they have to prank a government official into talking about an urgent issue. '}, {'emotion': 'Disgust', 'intensity': '4', 'reason': 'We are too far into this for pranks, We need real solutions '}, {'emotion': 'Disgust', 'intensity': '5', 'reason': 'why? people have died take it seriously'}, {'emotion': 'Amusement', 'intensity…
433	What is gun control? Everything you need to know	anonymous-source/all_shooting_images_newest/10005.jpg	[{'emotion': 'Contentment', 'intensity': '3', 'reason': 'people should know more about gun control in America.'}, {'emotion': 'Excitement', 'intensity': '3', 'reason': 'I would read on '}, {'emotion': 'Contentment', 'intensity': '5', 'reason': 'education is good'}, {'emotion': 'Contentment', 'intensity': '1', 'reason': 'I would read this to learn more about gun control. This would be an informati…
437	Transcript: Americans affected by gun violence on 'Face the Nation,' Feb. 25, 2018	anonymous-source/all_shooting_images_newest/10520.jpg	[{'emotion': 'Anger', 'intensity': '3', 'reason': 'Any gun violence and crime is the result of ignoring the issue. '}, {'emotion': 'Contentment', 'intensity': '3', 'reason': 'I would possibly tune in '}, {'emotion': 'Contentment', 'intensity': '3', 'reason': 'ok good education is good'}, {'emotion': 'Sadness', 'intensity': '3', 'reason': 'This had to due with the Parkland shooting which was a ter…
439	Parkland School Shooting Suspect Nikolas Cruz Spotted Giggling, Laughing While in Jail, Observation Report Says	anonymous-source/all_shooting_images_newest/10255.jpg	[{'emotion': 'Anger', 'intensity': '3', 'reason': "It will aggravate people's fear of gun violence."}, {'emotion': 'Fear', 'intensity': '3', 'reason': 'Hard to imagine, what was he thinking?'}, {'emotion': 'Anger', 'intensity': '4', 'reason': 'He is a murder, but he does not know his sin.'}, {'emotion': 'Disgust', 'intensity': '5', 'reason': 'This person is clearly mentally insane. But then again…
440	Montana Senate Candidate Confuses Second Amendment With Article II In Campaign Ad	anonymous-source/all_shooting_images_newest/90419.jpg	[{'emotion': 'Fear', 'intensity': '3', 'reason': "It will aggravate people's fear of gun violence."}, {'emotion': 'Disgust', 'intensity': '3', 'reason': 'He has no political savvy at all'}, {'emotion': 'Amusement', 'intensity': '2', 'reason': 'I do not understand this new.'}, {'emotion': 'Contentment', 'intensity': '3', 'reason': 'People make mistakes. As long as this is not a constant occurrence…
442	Former GOP Governor Tells Child-aged Toy on Sacha Baron Cohen Show It Can Buy Machine Gun	anonymous-source/all_shooting_images_newest/316.jpg	[{'emotion': 'Fear', 'intensity': '3', 'reason': "It will aggravate people's fear of gun violence."}, {'emotion': 'Anger', 'intensity': '3', 'reason': 'The idea of violence should not be instilled in children'}, {'emotion': 'Anger', 'intensity': '4', 'reason': 'Why did he do so?'}, {'emotion': 'Disgust', 'intensity': '3', 'reason': 'I see child and gun in the same sentence.'}, {'emotion': 'Anger'…
449	Florida shooter showed violence at home, police reports reveal	anonymous-source/all_shooting_images_newest/10264.jpg	[{'emotion': 'Fear', 'intensity': '4', 'reason': "It will aggravate people's fear of gun violence."}, {'emotion': 'Fear', 'intensity': '3', 'reason': "It's terrible."}, {'emotion': 'Anger', 'intensity': '4', 'reason': 'people cant quit violence'}, {'emotion': 'Sadness', 'intensity': '5', 'reason': 'Hurting someone else does not heal your hurt.'}, {'emotion': 'Anger', 'intensity': '4', 'reason': '…
458	Advocates see opening for tougher gun control laws for those guilty of domestic violence	anonymous-source/all_shooting_images_newest/10716.jpg	[{'emotion': 'Sadness', 'intensity': '3', 'reason': "It will aggravate people's fear of gun violence."}, {'emotion': 'Contentment', 'intensity': '3', 'reason': 'Do something realistic'}, {'emotion': 'Excitement', 'intensity': '3', 'reason': 'very reasonable!'}, {'emotion': 'Contentment', 'intensity': '3', 'reason': 'I am not sure what this is trying to say. Are there stricter laws to protect thos…
459	Federal judge blocks release of blueprints for 3-D-printed guns	anonymous-source/all_shooting_images_newest/273.jpg	[{'emotion': 'Awe', 'intensity': '4', 'reason': 'It will protect people from the proliferation of guns.\r\n'}, {'emotion': 'Contentment', 'intensity': '3', 'reason': 'I think 3-D-printed guns may lead to more shootings.'}, {'emotion': 'Disgust', 'intensity': '2', 'reason': 'annoyed with our society that a 3D gun is something someone wants'}, {'emotion': 'Contentment', 'intensity': '3', 'reason': …
462	Liberal Pittsburgh mayor calls for gun control, rejects Trump s call for more armed guards	anonymous-source/all_shooting_images_newest/100394.jpg	[{'emotion': 'Awe', 'intensity': '3', 'reason': 'It will protect people from the proliferation of guns.'}, {'emotion': 'Contentment', 'intensity': '4', 'reason': 'I agree with gun control.'}, {'emotion': 'Excitement', 'intensity': '4', 'reason': 'that something positive is being done'}, {'emotion': 'Contentment', 'intensity': '2', 'reason': 'This is that mayors right, especially given he is an el…
465	Florida school shooter heard voices telling him to kill	anonymous-source/all_shooting_images_newest/204.jpg	[{'emotion': 'Fear', 'intensity': '4', 'reason': 'It will aggravate people’s problems with the proliferation of guns.'}, {'emotion': 'Fear', 'intensity': '4', 'reason': 'The shooter is a lunatic.'}, {'emotion': 'Disgust', 'intensity': '4', 'reason': 'that this is how this story is framed. '}, {'emotion': 'Fear', 'intensity': '3', 'reason': 'it is scary that mentally ill people can get their hands…
467	Cardi B Thinks Black Excellence Scares Trump's America, Especially 'Scrawny' Men 'Raised in a Trailer in Alabama': 'That's Why They Own Guns'	anonymous-source/all_shooting_images_newest/10303.jpg	[{'emotion': 'Fear', 'intensity': '4', 'reason': 'It will aggravate people’s problems with the proliferation of guns.'}, {'emotion': 'Fear', 'intensity': '3', 'reason': 'Those people who own guns are dangerous.'}, {'emotion': 'Amusement', 'intensity': '2', 'reason': 'okay, first of all, so out of context but knowing a little about who Cardi is as a person makes this very funny. I think a lot of s…
471	Rubio: Gun laws wouldn't have prevented Parkland	anonymous-source/all_shooting_images_newest/10894.jpg	[{'emotion': 'Fear', 'intensity': '3', 'reason': 'It will aggravate people’s problems with the proliferation of guns.'}, {'emotion': 'Anger', 'intensity': '3', 'reason': 'I think gun laws are necessary.'}, {'emotion': 'Anger', 'intensity': '1', 'reason': 'im annoyed at this dumb man for having dumb thoughts. '}, {'emotion': 'Sadness', 'intensity': '1', 'reason': "I don't agree with this stance an…
472	Brett Kavanaugh: How could Trump's new Supreme Court justice shape battles over abortion rights, gun control, and impeachment	anonymous-source/all_shooting_images_newest/100397.jpg	[{'emotion': 'Disgust', 'intensity': '3', 'reason': 'It will aggravate people’s problems with the proliferation of guns.'}, {'emotion': 'Contentment', 'intensity': '3', 'reason': "I want to know how could Trump's new Supreme Court justice shape battles over abortion rights, gun control, and impeachment.\r\n"}, {'emotion': 'Fear', 'intensity': '4', 'reason': "i'm really so scared were going to mak…
473	Planned shift on gun exports kicks up storm	anonymous-source/all_shooting_images_newest/10131.jpg	[{'emotion': 'Fear', 'intensity': '4', 'reason': 'It will aggravate people’s problems with the proliferation of guns.'}, {'emotion': 'Fear', 'intensity': '2', 'reason': "I don't know what the storm is."}, {'emotion': 'Fear', 'intensity': '2', 'reason': "this is just going to make me more nervous and think that people around me have guns on them (which they probably do cause America but I don't wa…
474	Pennsylvania High School Punishes More Than 200 Students for Participating in National Walkout Against Gun Violence	anonymous-source/all_shooting_images_newest/10078.jpg	[{'emotion': 'Awe', 'intensity': '4', 'reason': 'It will protect people from the proliferation of guns.'}, {'emotion': 'Anger', 'intensity': '4', 'reason': 'I am against gun violence as well.'}, {'emotion': 'Anger', 'intensity': '1', 'reason': 'that the story is framed in this way. but also annoyed with solutions to the outcome like a walk out instead of solutions to the problem like gun control.…
475	Shooting suspect was able to buy guns despite mental illness	anonymous-source/all_shooting_images_newest/322.jpg	[{'emotion': 'Fear', 'intensity': '4', 'reason': 'It will aggravate people’s problems with the proliferation of guns.'}, {'emotion': 'Disgust', 'intensity': '5', 'reason': 'It is insane. I think people with mental illness should not be allowed to buy guns.'}, {'emotion': 'Fear', 'intensity': '1', 'reason': "that they're painting mental illness is such a negative light. but i understand the intend…
477	Father who lost child in Parkland massacre: Survivors' gun control efforts go 'in the wrong direction'	anonymous-source/all_shooting_images_newest/10311.jpg	[{'emotion': 'Sadness', 'intensity': '5', 'reason': 'It will aggravate people’s problems with the proliferation of guns.'}, {'emotion': 'Fear', 'intensity': '3', 'reason': 'I want to know why does he say that.'}, {'emotion': 'Fear', 'intensity': '1', 'reason': "I feel bad for the father losing a child takes a horrible toll on the parent. but what do you mean wrong direction. I don't care enough t…
486	Thousands Attended The First Funerals For The Victims Of The Pittsburgh Synagogue Shooting	anonymous-source/all_shooting_images_newest/100417.jpg	[{'emotion': 'Sadness', 'intensity': '3', 'reason': "shouldn't have to be happening today we should have better gun control"}, {'emotion': 'Sadness', 'intensity': '4', 'reason': 'hearing about the loss of lives and imagining the families that are suffering is painful'}, {'emotion': 'Sadness', 'intensity': '4', 'reason': 'They could have survived. '}, {'emotion': 'Sadness', 'intensity': '3', 'reas…
487	School shootings: How parents can cope with their own fears and anxieties	anonymous-source/all_shooting_images_newest/90267.jpg	[{'emotion': 'Anger', 'intensity': '2', 'reason': "maybe it shouldn't be annoying but why are we dealing with emotions instead of actual solutions"}, {'emotion': 'Sadness', 'intensity': '4', 'reason': "this should not be something that parents are taught to cope with, it shouldn't be an issue in the first place"}, {'emotion': 'Sadness', 'intensity': '3', 'reason': 'These parents are worried about…
488	Broward County, Florida, newspaper pulls all gun ads following front-page controversy	anonymous-source/all_shooting_images_newest/10837.jpg	[{'emotion': 'Contentment', 'intensity': '1', 'reason': 'i dont have a strong emotion '}, {'emotion': 'Contentment', 'intensity': '1', 'reason': "this doesn't make me feel much of anything "}, {'emotion': 'Contentment', 'intensity': '4', 'reason': 'gun ads should not be on the front page'}, {'emotion': 'Contentment', 'intensity': '3', 'reason': 'The ad should be pulled '}, {'emotion': 'Contentmen…
489	This is an unspoken culprit of school shootings	anonymous-source/all_shooting_images_newest/10679.jpg	[{'emotion': 'Sadness', 'intensity': '4', 'reason': 'I feel like everyone blames everyone but the people in power'}, {'emotion': 'Fear', 'intensity': '2', 'reason': 'it is frightening to think about there being a cause of shootings, and knowing that someone you interact with could be suffering from the culprit of the shootings'}, {'emotion': 'Fear', 'intensity': '4', 'reason': 'I am curious what …
491	Will Paul Ryan, Mitch McConnell embrace Trump's gun reforms?	anonymous-source/all_shooting_images_newest/10364.jpg	[{'emotion': 'Disgust', 'intensity': '3', 'reason': 'rich white male politicians and the issue of gun rights are a pretty disgusting combination'}, {'emotion': 'Sadness', 'intensity': '1', 'reason': 'I want to know the answer to the question'}, {'emotion': 'Fear', 'intensity': '3', 'reason': "I want to see others' analysis of the issue."}, {'emotion': 'Amusement', 'intensity': '3', 'reason': 'it …
496	Las Vegas marks 1-year shooting anniversary Video	anonymous-source/all_shooting_images_newest/100418.jpg	[{'emotion': 'Sadness', 'intensity': '3', 'reason': 'it is a sad situation'}, {'emotion': 'Sadness', 'intensity': '4', 'reason': 'the video is terrifying to watch and saddening to see lives being lost'}, {'emotion': 'Contentment', 'intensity': '3', 'reason': 'The video can remind people of what happened.'}, {'emotion': 'Anger', 'intensity': '3', 'reason': 'that was such a horrific day and we have…
497	Teaching in the Age of School Shootings	anonymous-source/all_shooting_images_newest/90342.jpg	[{'emotion': 'Sadness', 'intensity': '3', 'reason': 'I remember when we were doing a shooting drill and my hs teacher told us she had a kid at home and if something happened he would be alone'}, {'emotion': 'Sadness', 'intensity': '3', 'reason': 'school shootings detracts from the purpose of school as a safe space away from the home to learn and grow our youth'}, {'emotion': 'Sadness', 'intensity…
499	Remington, Centuries-Old Gun Maker, Files for Bankruptcy as Sales Slow	anonymous-source/all_shooting_images_newest/10006.jpg	[{'emotion': 'Contentment', 'intensity': '3', 'reason': 'less guns are being made '}, {'emotion': 'Excitement', 'intensity': '3', 'reason': 'fewer people buy guns'}, {'emotion': 'Contentment', 'intensity': '3', 'reason': 'its good gun sales are slow '}, {'emotion': 'Contentment', 'intensity': '2', 'reason': "i'm happy that gun sales are low, i don't feel bad for the businesses because I had never…
503	Vista, Maker of Ammunition and Recreation Gear, Plans to Sell Off Gun-Making Unit	anonymous-source/all_shooting_images_newest/10480.jpg	[{'emotion': 'Contentment', 'intensity': '3', 'reason': 'hopefully that means they will no longer be making them '}, {'emotion': 'Fear', 'intensity': '3', 'reason': 'maybe there would be a lack of control'}, {'emotion': 'Fear', 'intensity': '4', 'reason': 'who are they selling it to '}, {'emotion': 'Sadness', 'intensity': '3', 'reason': "I don't love seeing people using guns for capitalistic reas…
504	CalSTRS to pressure retailers to stop selling assault weapons banned by California	anonymous-source/all_shooting_images_newest/10145.jpg	[{'emotion': 'Excitement', 'intensity': '4', 'reason': 'in hopes that assault weapons will stop being sold and happy that someone is pushing for it'}, {'emotion': 'Excitement', 'intensity': '3', 'reason': 'the gun problem can be solved a little '}, {'emotion': 'Excitement', 'intensity': '4', 'reason': 'this could be a step forward for gun control in California '}, {'emotion': 'Excitement', 'inten…
505	Memorial Service, 5K Among Events Marking Las Vegas Shooting	anonymous-source/all_shooting_images_newest/90420.jpg	[{'emotion': 'Anger', 'intensity': '4', 'reason': "there shouldn't need to be a memorial service. If gun laws were stricter those people would still be with us and the memorial wouldn't have to exist"}, {'emotion': 'Sadness', 'intensity': '3', 'reason': 'so many people died from gun shots '}, {'emotion': 'Sadness', 'intensity': '4', 'reason': 'it is so sad so many lives were lost '}, {'emotion': …
506	Gun control legislation remains stalled in Congress	anonymous-source/all_shooting_images_newest/10800.jpg	[{'emotion': 'Anger', 'intensity': '5', 'reason': "it shouldn't be such a large discussion. People die left and right and tragedies happen far too often. Ban guns or at least make large restrictions. It's not that hard. "}, {'emotion': 'Sadness', 'intensity': '3', 'reason': 'no efficient laws can protect people from gunshots '}, {'emotion': 'Anger', 'intensity': '4', 'reason': 'it is frustrating …
512	Trump Still Stands By Arming People Following Pittsburgh Synagogue Shooting	anonymous-source/all_shooting_images_newest/100491.jpg	[{'emotion': 'Disgust', 'intensity': '4', 'reason': "How can you defend guns after a tragedy like that it's beyond inappropriate and says a lot about him as a person and the protection of guns vs protection of people and religion"}, {'emotion': 'Anger', 'intensity': '3', 'reason': "obviously gun problem influence people's life "}, {'emotion': 'Anger', 'intensity': '4', 'reason': 'how can you even…
513	Assault weapons ban moves forward in Deerfield, April vote likely	anonymous-source/all_shooting_images_newest/10482.jpg	[{'emotion': 'Excitement', 'intensity': '4', 'reason': "assault weapons should be banned and it's amazing that somewhere could be one step closer to that"}, {'emotion': 'Excitement', 'intensity': '3', 'reason': 'gun problems may have a chance to improve '}, {'emotion': 'Excitement', 'intensity': '4', 'reason': 'it could be a step forward '}, {'emotion': 'Excitement', 'intensity': '3', 'reason': '…
514	Student survivors of Florida school shooting making their voices heard	anonymous-source/all_shooting_images_newest/10173.jpg	[{'emotion': 'Sadness', 'intensity': '4', 'reason': "they shouldn't have to "}, {'emotion': 'Sadness', 'intensity': '3', 'reason': 'students are suffering gun problems '}, {'emotion': 'Awe', 'intensity': '4', 'reason': 'those kids are so strong and brave to push for gun control reform '}, {'emotion': 'Awe', 'intensity': '3', 'reason': "it's great to see people directly affected by gun violence sp…
517	Stephen Colbert Stands With Florida Students Fighting for Gun Control	anonymous-source/all_shooting_images_newest/10439.jpg	[{'emotion': 'Contentment', 'intensity': '3', 'reason': 'large figures standing for things can make a big difference '}, {'emotion': 'Excitement', 'intensity': '3', 'reason': ' more and more people are paying attention to gun problems '}, {'emotion': 'Contentment', 'intensity': '4', 'reason': 'they deserve support '}, {'emotion': 'Contentment', 'intensity': '3', 'reason': "it's great to see a pro…
521	Florida shooting: White House refuses to release photo of Trump signing bill weakening gun laws for mentally ill	anonymous-source/all_shooting_images_newest/10413.jpg	[{'emotion': 'Disgust', 'intensity': '4', 'reason': 'why the White House refused to do so?'}, {'emotion': 'Fear', 'intensity': '3', 'reason': "I don't understand "}, {'emotion': 'Anger', 'intensity': '4', 'reason': "seriously if they can't even own up to it they shouldn't be signing it"}, {'emotion': 'Anger', 'intensity': '3', 'reason': 'the president was too weak to take responsibility for his d…
526	Pittsburgh Synagogue Shooting Spurs Outpouring of Grief	anonymous-source/all_shooting_images_newest/100446.jpg	[{'emotion': 'Fear', 'intensity': '4', 'reason': 'I am worried that a shooting might happen near me.'}, {'emotion': 'Sadness', 'intensity': '3', 'reason': 'fear the guns '}, {'emotion': 'Sadness', 'intensity': '3', 'reason': "I wish there wasn't anything to feel grief over"}, {'emotion': 'Sadness', 'intensity': '3', 'reason': 'lives were lost, and people were targeted based on their religious bel…
528	Bandmates remember friend killed in series of 'cold-blooded' Nashville shootings	anonymous-source/all_shooting_images_newest/3.jpg	[{'emotion': 'Sadness', 'intensity': '3', 'reason': 'Because of the death of innocent people'}, {'emotion': 'Sadness', 'intensity': '3', 'reason': 'sad about the story '}, {'emotion': 'Sadness', 'intensity': '3', 'reason': 'It is sad that happened'}, {'emotion': 'Sadness', 'intensity': '4', 'reason': 'people are talking about a loved one that they lost'}, {'emotion': 'Anger', 'intensity': '4', 'r…
530	7 ways to help prevent school shootings	anonymous-source/all_shooting_images_newest/10169.jpg	[{'emotion': 'Contentment', 'intensity': '3', 'reason': "That's very good for students"}, {'emotion': 'Contentment', 'intensity': '3', 'reason': 'the content is necessary '}, {'emotion': 'Sadness', 'intensity': '1', 'reason': "i dont know its sad but doesn't evoke strong feelings ive been hearing topics like this my entire school career"}, {'emotion': 'Sadness', 'intensity': '2', 'reason': "this …
531	Santorum: Instead of calling for gun laws, kids should take CPR classes	anonymous-source/all_shooting_images_newest/10418.jpg	[{'emotion': 'Contentment', 'intensity': '3', 'reason': "That's right!"}, {'emotion': 'Contentment', 'intensity': '3', 'reason': 'I agree '}, {'emotion': 'Anger', 'intensity': '4', 'reason': 'what the fuck this sucks'}, {'emotion': 'Anger', 'intensity': '3', 'reason': 'this is a ridiculous response because it is reactive not preventative'}, {'emotion': 'Sadness', 'intensity': '4', 'reason': 'stud…
536	The feds were watching, but unlicensed gun dealer was still able to sell Glock that killed Chicago police officer	anonymous-source/all_shooting_images_newest/100471.jpg	[{'emotion': 'Anger', 'intensity': '4', 'reason': 'Local authorities should have curbed the illegal sale of firearms'}, {'emotion': 'Sadness', 'intensity': '3', 'reason': 'angry about the incidence'}, {'emotion': 'Anger', 'intensity': '4', 'reason': 'literally when will things change'}, {'emotion': 'Fear', 'intensity': '4', 'reason': 'there is always a chance of guns getting in the wrong hands de…
538	Gun control group targets firearms owners with new ads, seeks common ground	anonymous-source/all_shooting_images_newest/32.jpg	[{'emotion': 'Contentment', 'intensity': '4', 'reason': 'It appears that illegal gun ownership can be limited'}, {'emotion': 'Contentment', 'intensity': '3', 'reason': 'some progress '}, {'emotion': 'Contentment', 'intensity': '2', 'reason': 'I can appreciate trying to change things'}, {'emotion': 'Contentment', 'intensity': '2', 'reason': 'there is an attempt to find common ground and create las…
544	Poll: Support for gun control hits record high	anonymous-source/all_shooting_images_newest/10092.jpg	[{'emotion': 'Excitement', 'intensity': '3', 'reason': 'they are recognizing the importance of supporting gun control yet if it keeps people safe it should not even be up for debate. '}, {'emotion': 'Excitement', 'intensity': '4', 'reason': 'yay glad people agree'}, {'emotion': 'Excitement', 'intensity': '2', 'reason': "yay that's good but actually do something"}, {'emotion': 'Excitement', 'inten…
546	Gunman who killed 2 at Florida yoga studio had history of harassing young women	anonymous-source/all_shooting_images_newest/110507.jpg	[{'emotion': 'Disgust', 'intensity': '3', 'reason': 'men are gross and this is an embarrassment to the male gender. '}, {'emotion': 'Anger', 'intensity': '5', 'reason': "obviously. we've known about the link. women have been pointing out the flags but no one wants to listen till its too late"}, {'emotion': 'Anger', 'intensity': '4', 'reason': 'police should have noticed a pattern'}, {'emotion': '…
549	Texas man is selling 3D gun blueprints online despite court orders	anonymous-source/all_shooting_images_newest/409.jpg	[{'emotion': 'Anger', 'intensity': '3', 'reason': "people don't listen or care. "}, {'emotion': 'Disgust', 'intensity': '1', 'reason': 'people are dumb why would someone do this'}, {'emotion': 'Anger', 'intensity': '4', 'reason': 'what is happening because of that'}, {'emotion': 'Anger', 'intensity': '3', 'reason': '.'}, {'emotion': 'Fear', 'intensity': '3', 'reason': 'He looks terrifying with a …
556	Yoga studio shooter posted racist, misogynistic videos	anonymous-source/all_shooting_images_newest/110509.jpg	[{'emotion': 'Disgust', 'intensity': '3', 'reason': 'the more headlines I read about this man the more I fucking hate him. '}, {'emotion': 'Disgust', 'intensity': '1', 'reason': 'of course he did. '}, {'emotion': 'Anger', 'intensity': '3', 'reason': 'this sucks so freaking much'}, {'emotion': 'Disgust', 'intensity': '3', 'reason': '.'}, {'emotion': 'Sadness', 'intensity': '3', 'reason': 'Someone …
559	Calif. teacher arrested for road rage and armed robbery, had loaded gun in classroom during arrest	anonymous-source/all_shooting_images_newest/397.jpg	[{'emotion': 'Fear', 'intensity': '4', 'reason': 'Children are taught to trust teachers and this teacher was clearly unstable and brought a weapon into a safe space.'}, {'emotion': 'Fear', 'intensity': '5', 'reason': 'we let crazy unhinged people around children. '}, {'emotion': 'Fear', 'intensity': '3', 'reason': 'that is a terrifying scenario'}, {'emotion': 'Fear', 'intensity': '3', 'reason': '…
560	Trump is uniquely positioned to cut a deal to prevent school shootings	anonymous-source/all_shooting_images_newest/10659.jpg	[{'emotion': 'Excitement', 'intensity': '3', 'reason': 'It would be great to see legislation to help prevent these tragedies from occurring.'}, {'emotion': 'Anger', 'intensity': '1', 'reason': 'what how? prevent how '}, {'emotion': 'Anger', 'intensity': '3', 'reason': 'he did not use that power if he had it'}, {'emotion': 'Disgust', 'intensity': '3', 'reason': 'of course he benefits, sick sick ma…
562	Joe Manchin once again aims and shoots in a new TV ad	anonymous-source/all_shooting_images_newest/90185.jpg	[{'emotion': 'Anger', 'intensity': '1', 'reason': "I don't really get the usage of gun violence in a commercial given the current climate surrounding guns."}, {'emotion': 'Disgust', 'intensity': '1', 'reason': "I don't care about Joe manchin fuck that idiot said we gave him power"}, {'emotion': 'Disgust', 'intensity': '1', 'reason': 'i dont think i know necessary context'}, {'emotion': 'Anger', '…
564	YouTube to Ban Videos Promoting Gun Sales	anonymous-source/all_shooting_images_newest/10277.jpg	[{'emotion': 'Contentment', 'intensity': '4', 'reason': 'It is good to see a company taking steps to fight gun violence. It is what most companies should be doing if possible. '}, {'emotion': 'Excitement', 'intensity': '2', 'reason': 'good idea'}, {'emotion': 'Contentment', 'intensity': '3', 'reason': 'that is probably a good thing'}, {'emotion': 'Contentment', 'intensity': '3', 'reason': 'they s…
566	Trump dubs California bar shooter 'sick puppy' as community grieves	anonymous-source/all_shooting_images_newest/110128.jpg	[{'emotion': 'Disgust', 'intensity': '3', 'reason': 'This is a very insensitive response, and the country deserves a response that takes the event seriously. '}, {'emotion': 'Disgust', 'intensity': '1', 'reason': 'trumps an idiot '}, {'emotion': 'Disgust', 'intensity': '4', 'reason': 'I really cannot stand trump'}, {'emotion': 'Disgust', 'intensity': '3', 'reason': 'the comments he make are not d…
567	NRA's Wayne LaPierre says gun control advocates 'hate individual freedom'	anonymous-source/all_shooting_images_newest/10472.jpg	[{'emotion': 'Anger', 'intensity': '3', 'reason': "It is disappointing to see that some people are so focused on their personal agenda that they can't see the bigger picture to solve the problem. "}, {'emotion': 'Anger', 'intensity': '5', 'reason': 'bitch I love my individual freedom to not live in fear of being shot by some misinformed selfish idiot we allowed to have a murder weapon. '}, {'emot…
568	What are esports and Twitch? Shooting at video game tournament promts questions	anonymous-source/all_shooting_images_newest/186.jpg	[{'emotion': 'Sadness', 'intensity': '2', 'reason': 'It seems like there is no space that is truly safe from the possibility of a shooting happening. '}, {'emotion': 'Fear', 'intensity': '1', 'reason': 'its sad when we turn to video games as a victim for increased gun violence. were avoiding the actual problem'}, {'emotion': 'Sadness', 'intensity': '2', 'reason': 'I feel like i dont know contect'…
569	Parkland School Shooter Blames Massacre on a Demon Voice	anonymous-source/all_shooting_images_newest/418.jpg	[{'emotion': 'Fear', 'intensity': '3', 'reason': 'It scares me that people that are suffering from serious mental ailments can get their hands on a gun.'}, {'emotion': 'Sadness', 'intensity': '1', 'reason': 'I just dont like the phrasing of this'}, {'emotion': 'Sadness', 'intensity': '3', 'reason': 'It sucks all around idk'}, {'emotion': 'Disgust', 'intensity': '3', 'reason': "there are plenty of…
570	Student survivors of mass shooting say they're disappointed in lawmakers, but vow to keep fighting	anonymous-source/all_shooting_images_newest/10697.jpg	[{'emotion': 'Excitement', 'intensity': '1', 'reason': "I like that they refuse to get discouraged, even when they haven't been able to get the reform that they are looking for. "}, {'emotion': 'Excitement', 'intensity': '4', 'reason': 'as they should. sad lawmakers suck '}, {'emotion': 'Awe', 'intensity': '3', 'reason': 'I appreciate their actions and fortitude'}, {'emotion': 'Excitement', 'inte…
571	I won't be a Gabby Giffords': Congressman pulls out loaded pistol in front of gun control activists	anonymous-source/all_shooting_images_newest/10531.jpg	[{'emotion': 'Anger', 'intensity': '3', 'reason': 'This is completely inappropriate for a lawmaker to do. Even with a differing opinion, his job is to stay professional. Also, guns are not a toy to be shown off as he did. '}, {'emotion': 'Fear', 'intensity': '1', 'reason': 'this man is an idiot? why would he do that'}, {'emotion': 'Anger', 'intensity': '3', 'reason': 'literally what is up with po…
578	Gunman 'clearly targeted other gamers' at Florida tournament	anonymous-source/all_shooting_images_newest/194.jpg	[{'emotion': 'Sadness', 'intensity': '4', 'reason': 'It is upsetting to think about the unsuspecting victims that died that day.'}, {'emotion': 'Sadness', 'intensity': '1', 'reason': "gunman had a target doesn't seem like big news"}, {'emotion': 'Sadness', 'intensity': '2', 'reason': 'that sucks and is terrible'}, {'emotion': 'Fear', 'intensity': '3', 'reason': 'a video game tournament is sucha. …
582	Judge Temporarily Blocks Distribution of Files for Printing Guns	anonymous-source/all_shooting_images_newest/497.jpg	[{'emotion': 'Contentment', 'intensity': '3', 'reason': 'I think printed guns are dangerous.'}, {'emotion': 'Contentment', 'intensity': '3', 'reason': "I don't know what this means. So, I don't have an opinion."}, {'emotion': 'Amusement', 'intensity': '3', 'reason': 'do not understand'}, {'emotion': 'Awe', 'intensity': '3', 'reason': 'Guns need to be controlled.'}, {'emotion': 'Contentment', 'int…
596	Community mourns after mass shooting at Pittsburgh synagogue	anonymous-source/all_shooting_images_newest/100490.jpg	[{'emotion': 'Sadness', 'intensity': '3', 'reason': 'sad for victims'}, {'emotion': 'Disgust', 'intensity': '5', 'reason': 'Why do people keep shooting at religious places of worship?'}, {'emotion': 'Amusement', 'intensity': '3', 'reason': 'do not understand'}, {'emotion': 'Awe', 'intensity': '3', 'reason': 'people died in shooting event should be respected. '}, {'emotion': 'Sadness', 'intensity'…
602	Exclusive: Democrats fund spike in gun control ads this election cycle	anonymous-source/all_shooting_images_newest/455.jpg	[{'emotion': 'Contentment', 'intensity': '4', 'reason': 'This is the right thing to do.'}, {'emotion': 'Amusement', 'intensity': '3', 'reason': 'I felt concerned about the reason why these politician decide to do so. but overall, they are doing great on gun control. So basically I felt happy'}, {'emotion': 'Contentment', 'intensity': '4', 'reason': 'this is a necessary move--we should be seeing m…
605	NRA under mounting pressure as companies cut ties with gun lobby	anonymous-source/all_shooting_images_newest/10546.jpg	[{'emotion': 'Anger', 'intensity': '4', 'reason': 'Their rights should be protected.'}, {'emotion': 'Amusement', 'intensity': '3', 'reason': 'I felt interesting about the news; also I felt satisfied that NRA is under pressure, because I am a supporter of gun control'}, {'emotion': 'Contentment', 'intensity': '4', 'reason': 'companies are cutting ties with the NRA.'}, {'emotion': 'Contentment', 'i…
606	Las Vegas shooting memorial marks grim anniversary: 'None of us will ever be the same'	anonymous-source/all_shooting_images_newest/100440.jpg	[{'emotion': 'Awe', 'intensity': '4', 'reason': 'This is really memorable.'}, {'emotion': 'Sadness', 'intensity': '3', 'reason': 'I felt extremely sad for the people who died in the shooting. Also sad especially that people are organizing event to memorize people who died'}, {'emotion': 'Sadness', 'intensity': '5', 'reason': 'the quoted used here is very powerful, and I really feel for the commun…
609	Parkland shooting suspect seen 'smiling and giggling' in jail, records show	anonymous-source/all_shooting_images_newest/10902.jpg	[{'emotion': 'Anger', 'intensity': '5', 'reason': 'He shuould pay for his fault.'}, {'emotion': 'Disgust', 'intensity': '5', 'reason': 'I am extremely angry and disgusting about the person who have no sympathy and penitence. he deserves death penalty'}, {'emotion': 'Anger', 'intensity': '5', 'reason': 'the "smiling and giggling" shows that the shooter has absolutely no remorse for taking innocent…
610	These Are The Victims Of The Santa Fe High School Shooting	anonymous-source/all_shooting_images_newest/10044.jpg	[{'emotion': 'Sadness', 'intensity': '4', 'reason': 'Those people are innocent.'}, {'emotion': 'Sadness', 'intensity': '5', 'reason': 'I felt very sad and sorry for people who died in the shooting.'}, {'emotion': 'Sadness', 'intensity': '5', 'reason': 'this headline humanizes the victims and implies that the news outlet is going to show their photos and tell their stories. They were real people w…
612	Rudy Giuliani keeps tweeting on Chicago gun violence and Garry McCarthy says he's 'a proud Democrat'	anonymous-source/all_shooting_images_newest/460.jpg	[{'emotion': 'Contentment', 'intensity': '3', 'reason': 'This is understandable.'}, {'emotion': 'Amusement', 'intensity': '2', 'reason': 'I felt curious about what had happened. Also, I think it is funny to know about these Twitter things and the conflicts. and what he said looks very funny'}, {'emotion': 'Anger', 'intensity': '4', 'reason': 'Giuliani is a controversial figure and I cannot imagin…
616	Community, Religious Leaders Say Pittsburgh Synagogue Shooting 'Will Not Break Us' At Vigil	anonymous-source/all_shooting_images_newest/100445.jpg	[{'emotion': 'Awe', 'intensity': '4', 'reason': 'Citizens are powerful.'}, {'emotion': 'Amusement', 'intensity': '2', 'reason': 'I felt very sad that there are people being killed. But I am glad to see people never forget them and made events to memorize them. Also I am curious about what they are going to talk about \r\n'}, {'emotion': 'Sadness', 'intensity': '5', 'reason': 'this is a very emoti…
620	Son, I love you': Heartbreaking stories emerge of Thousand Oaks mass shooting victims - ABC News	anonymous-source/all_shooting_images_newest/110517.jpg	[{'emotion': 'Sadness', 'intensity': '3', 'reason': 'of the touching words and mourning for those lost because of the shooting.'}, {'emotion': 'Sadness', 'intensity': '5', 'reason': 'The personal quote made the headline seem much more personal.'}, {'emotion': 'Sadness', 'intensity': '4', 'reason': 'Sounds really sad.'}, {'emotion': 'Sadness', 'intensity': '5', 'reason': 'A parent should never hav…
625	Right-Wing Pundit Taunts Survivors of Parkland Shooting for Losing Weapons-Ban Vote in Florida Legislature	anonymous-source/all_shooting_images_newest/10066.jpg	[{'emotion': 'Disgust', 'intensity': '4', 'reason': 'one does not have to rub it in like that'}, {'emotion': 'Disgust', 'intensity': '5', 'reason': 'it is horrible to taunt survivors after such an event irrespective of why.'}, {'emotion': 'Anger', 'intensity': '2', 'reason': 'It sounds bad and should not happen.'}, {'emotion': 'Disgust', 'intensity': '4', 'reason': 'These kids worked hard after s…
632	New Mexico Democratic congressional candidate showcases her gun skills in ad	anonymous-source/all_shooting_images_newest/100171.jpg	[{'emotion': 'Fear', 'intensity': '3', 'reason': "I don't know the logic behind this move."}, {'emotion': 'Amusement', 'intensity': '2', 'reason': 'why would this be something to include in an ad.'}, {'emotion': 'Awe', 'intensity': '2', 'reason': 'Nothing to say, no feelings at all.'}, {'emotion': 'Disgust', 'intensity': '2', 'reason': 'What relevance does this skill have with politics?'}, {'emot…
636	Gov. Brown just signed a stack of new gun control laws. Here's what they do	anonymous-source/all_shooting_images_newest/90227.jpg	[{'emotion': 'Amusement', 'intensity': '3', 'reason': 'I want to know what it entails.'}, {'emotion': 'Excitement', 'intensity': '4', 'reason': 'the headline is extremely positive and pulls you in really well.'}, {'emotion': 'Contentment', 'intensity': '2', 'reason': 'I think it is a good thing.'}, {'emotion': 'Contentment', 'intensity': '2', 'reason': 'We need a lot more gun control laws.'}, {'e…
643	The Gun Business Is Bouncing Back From a Long Trump Slump	anonymous-source/all_shooting_images_newest/90116.jpg	[{'emotion': 'Sadness', 'intensity': '3', 'reason': "what's the reason for the bouncing back? "}, {'emotion': 'Fear', 'intensity': '3', 'reason': 'Gun business rising in popularity can lead to more gun ownership and possibly violence. '}, {'emotion': 'Sadness', 'intensity': '3', 'reason': 'sad'}, {'emotion': 'Amusement', 'intensity': '3', 'reason': 'Really? Did trump do something good? Why Trump …
655	Eiffel Tower, Empire State Building Go Dark To Honor Pittsburgh Synagogue Shooting Victims	anonymous-source/all_shooting_images_newest/100207.jpg	[{'emotion': 'Sadness', 'intensity': '3', 'reason': 'I truly feel sorry about what happened and all the losses. '}, {'emotion': 'Awe', 'intensity': '3', 'reason': 'I admire the efforts to respect the victims of the Synagogue shootings at major buildings across the world. '}, {'emotion': 'Sadness', 'intensity': '3', 'reason': 'sad'}, {'emotion': 'Sadness', 'intensity': '3', 'reason': 'Sad about th…
658	Rosanne Cash on California Shootings: We Use Young People as Collateral Damage for the Second Amendment	anonymous-source/all_shooting_images_newest/110472.jpg	[{'emotion': 'Sadness', 'intensity': '3', 'reason': 'Thanks for the voice and hope enough attention can be raised to the case. '}, {'emotion': 'Sadness', 'intensity': '3', 'reason': 'This is implying that because of the second amendment young people are dying which is partially true but it is the person behind the gun not the gun itself. '}, {'emotion': 'Anger', 'intensity': '3', 'reason': 'sad'}…
659	Pittsburgh shooting: Alleged gunman posted stream of anti-Semitic hate online in months and moments before attack	anonymous-source/all_shooting_images_newest/100064.jpg	[{'emotion': 'Sadness', 'intensity': '4', 'reason': 'I feel sad for the innocent people.'}, {'emotion': 'Anger', 'intensity': '3', 'reason': 'Very angry'}, {'emotion': 'Fear', 'intensity': '4', 'reason': 'scary he did that'}, {'emotion': 'Disgust', 'intensity': '4', 'reason': 'It is disappointing to see that that is happening in America still. The way that it is so easy to ignore signs like this …
665	Grieving parents of teen killed in Parkland school shooting use 'graphic activism' to confront the NRA	anonymous-source/all_shooting_images_newest/10860.jpg	[{'emotion': 'Sadness', 'intensity': '3', 'reason': 'I feel sad for the grieving parents of a teen killed in the Parkland school shooting.'}, {'emotion': 'Contentment', 'intensity': '3', 'reason': 'NRA needs to be confronted so i feel good'}, {'emotion': 'Sadness', 'intensity': '4', 'reason': 'sad they have to deal with the loss of their son'}, {'emotion': 'Awe', 'intensity': '4', 'reason': 'the …
666	Thousands Gather to Honor Victims of the Mass Shooting with Tears, Candlelight and Song	anonymous-source/all_shooting_images_newest/110414.jpg	[{'emotion': 'Awe', 'intensity': '5', 'reason': 'I think they are respectful because the gathered together to hold a commemorative event.'}, {'emotion': 'Sadness', 'intensity': '3', 'reason': 'sad and upset'}, {'emotion': 'Sadness', 'intensity': '5', 'reason': 'thats really sad and emotional '}, {'emotion': 'Sadness', 'intensity': '4', 'reason': 'so many innocent lives were lives even though this…
670	Health care tops guns, economy as voters' top issue	anonymous-source/all_shooting_images_newest/100090.jpg	[{'emotion': 'Contentment', 'intensity': '3', 'reason': 'I feel happy about the good healthcare.'}, {'emotion': 'Sadness', 'intensity': '3', 'reason': 'not confused what to feel'}, {'emotion': 'Contentment', 'intensity': '3', 'reason': 'not really sure what this means'}, {'emotion': 'Sadness', 'intensity': '4', 'reason': 'it is sad to see that healthcare and gun regulations that top the list of i…
671	Florida state senator: Only thoughts and prayers will stop evil behind shootings	anonymous-source/all_shooting_images_newest/10582.jpg	[{'emotion': 'Anger', 'intensity': '5', 'reason': 'I feel angry because the government should take precautionary measures against gun violence and assume the responsibility for protecting people rather than praying behind.'}, {'emotion': 'Anger', 'intensity': '3', 'reason': 'so much more needs to be done'}, {'emotion': 'Disgust', 'intensity': '4', 'reason': 'thats a horrible thing to say there is…
673	230 officers shifted to Baltimore streets after spate of deadly shootings	anonymous-source/all_shooting_images_newest/100373.jpg	[{'emotion': 'Fear', 'intensity': '4', 'reason': 'I am worried about the deadly shootings.'}, {'emotion': 'Sadness', 'intensity': '3', 'reason': 'sad'}, {'emotion': 'Fear', 'intensity': '4', 'reason': 'scary it has to come down to that'}, {'emotion': 'Fear', 'intensity': '4', 'reason': 'Police brutality is also a very big issue in America so it is difficult and also scary to see that many officer…
674	California lawmakers vote to expand gun restraining orders but ACLU says bill goes too far	anonymous-source/all_shooting_images_newest/10623.jpg	[{'emotion': 'Fear', 'intensity': '3', 'reason': 'I am worried about the final result of expanding gun restraining orders.'}, {'emotion': 'Anger', 'intensity': '3', 'reason': 'i feel upset'}, {'emotion': 'Anger', 'intensity': '4', 'reason': 'this law is not too far it should be passed'}, {'emotion': 'Sadness', 'intensity': '4', 'reason': "even when a State like California tries to fix the problem…
683	Plastic 3D guns printed at home will raise threat level for everyone, especially Congress	anonymous-source/all_shooting_images_newest/110.jpg	[{'emotion': 'Contentment', 'intensity': '4', 'reason': 'totally agree with the idea because this makes people uncontrollable. '}, {'emotion': 'Anger', 'intensity': '5', 'reason': 'same reason as before, lack of picture changes nothing'}, {'emotion': 'Fear', 'intensity': '3', 'reason': 'gun causes violence and the problem may become more serious.'}, {'emotion': 'Excitement', 'intensity': '5', 're…
684	Guns send 8,300 kids to hospitals each year, study finds	anonymous-source/all_shooting_images_newest/100264.jpg	[{'emotion': 'Anger', 'intensity': '5', 'reason': 'kids are innocent. they did not do anything but why they need to suffer these kind of disasters? it is not fair to kids! it is so angry that gun violence brings considerably negative effect to kids. '}, {'emotion': 'Anger', 'intensity': '5', 'reason': "same reason as before. lack of picture changes nothing. these are children, they shouldn't be d…
692	After Synagogue Shooting, Trump Retweets Supporter Who Had Retweeted Anti-Semitic Hashtag	anonymous-source/all_shooting_images_newest/100063.jpg	[{'emotion': 'Disgust', 'intensity': '5', 'reason': "Why Trump choose to do this action? isn't he doing the opposite action before with the victims? "}, {'emotion': 'Disgust', 'intensity': '5', 'reason': 'same reason as before'}, {'emotion': 'Anger', 'intensity': '4', 'reason': 'the contradiction would be aroused.'}, {'emotion': 'Disgust', 'intensity': '5', 'reason': "one of the president's of th…
693	Gun Rights Activists Defy Court Ruling, Post 3D-Printed Gun Blueprints Online	anonymous-source/all_shooting_images_newest/114.jpg	[{'emotion': 'Anger', 'intensity': '5', 'reason': "why they ignore the rulings? it makes me feel so angry because the thing for being hurt for people's life could not be ignored! "}, {'emotion': 'Fear', 'intensity': '5', 'reason': 'same reason as last time'}, {'emotion': 'Fear', 'intensity': '3', 'reason': 'gun causes violence.'}, {'emotion': 'Fear', 'intensity': '5', 'reason': '3D-Printed Guns s…
697	Delta ends NRA partnership and orders gun group to remove airline's information from website, amid growing backlash	anonymous-source/all_shooting_images_newest/10312.jpg	[{'emotion': 'Excitement', 'intensity': '4', 'reason': 'it is exciting because they need to protect their customers. '}, {'emotion': 'Awe', 'intensity': '3', 'reason': 'same reason as before. glad that delta ended the partnership'}, {'emotion': 'Contentment', 'intensity': '3', 'reason': 'more people realize that shooting has threatened people’s lives.'}, {'emotion': 'Excitement', 'intensity': '5'…
698	#VegasStrong: Jason Aldean, Eric Church, and more remember Route 91 Harvest festival victims and survivors 1 year after shooting	anonymous-source/all_shooting_images_newest/100159.jpg	[{'emotion': 'Awe', 'intensity': '4', 'reason': 'people were still being remembered by others, i show. full respect to them. '}, {'emotion': 'Awe', 'intensity': '3', 'reason': 'same reason as before'}, {'emotion': 'Sadness', 'intensity': '3', 'reason': 'the shooting crime keeps happening, but the related policy still needs be improved.'}, {'emotion': 'Sadness', 'intensity': '5', 'reason': 'innoce…
700	Slowik: Thanksgiving Day food drive to honor Rich Central victim of gun violence	anonymous-source/all_shooting_images_newest/110123.jpg	[{'emotion': 'Sadness', 'intensity': '3', 'reason': 'they look sad'}, {'emotion': 'Sadness', 'intensity': '3', 'reason': 'they look sad'}, {'emotion': 'Sadness', 'intensity': '4', 'reason': "it describes how sad it is that people die because of gun violence but slightly happy as well because there is an attempt by the people to 'combat' this using non-violent method and to remember the victims as…
704	Does the U.S. lead the world in mass shootings?	anonymous-source/all_shooting_images_newest/90350.jpg	[{'emotion': 'Fear', 'intensity': '3', 'reason': 'gun is dangerous'}, {'emotion': 'Fear', 'intensity': '3', 'reason': 'gun is dangerous'}, {'emotion': 'Sadness', 'intensity': '3', 'reason': 'I am curious about the statistics but also slightly scared if that is the case since I will be in the US in the foreseeable future.'}, {'emotion': 'Sadness', 'intensity': '3', 'reason': '.'}, {'emotion': 'Fea…
710	Another day of funerals as Pittsburgh mourns synagogue shooting victims	anonymous-source/all_shooting_images_newest/110143.jpg	[{'emotion': 'Awe', 'intensity': '3', 'reason': 'he is speaking seriously'}, {'emotion': 'Awe', 'intensity': '3', 'reason': 'he is speaking seriously'}, {'emotion': 'Sadness', 'intensity': '4', 'reason': 'it shows another sad event caused by gun violence.'}, {'emotion': 'Sadness', 'intensity': '3', 'reason': '.'}, {'emotion': 'Sadness', 'intensity': '3', 'reason': 'They lost their lives unnecessa…
716	After Jacksonville shooting, is it too early to talk about gun laws? Today's talker	anonymous-source/all_shooting_images_newest/76.jpg	[{'emotion': 'Sadness', 'intensity': '3', 'reason': 'there is probably a crime.'}, {'emotion': 'Sadness', 'intensity': '3', 'reason': 'there is probably a crime.'}, {'emotion': 'Sadness', 'intensity': '2', 'reason': 'they care more about tying this to politics and such rather than focusing on the victims, but I can see this being two sides of a coin - so more of a neutral feeling for me.'}, {'emo…
719	Parkland Shooting Suspect Lost Special-Needs Help at School When He Needed It Most	anonymous-source/all_shooting_images_newest/457.jpg	[{'emotion': 'Sadness', 'intensity': '4', 'reason': 'it feels like this was a situation that was very avoidable.'}, {'emotion': 'Sadness', 'intensity': '2', 'reason': "One reason why the gun shoting happened is because the suspect's lack of help in mental health issues, making me feel sorry for him. "}, {'emotion': 'Contentment', 'intensity': '3', 'reason': 'since the suspect lost special-needs h…
724	NRA sues Florida over plan to put age limits on rifle purchases	anonymous-source/all_shooting_images_newest/10305.jpg	[{'emotion': 'Fear', 'intensity': '4', 'reason': "it's scary that the NRA can sue a state over an age restriction of a firearm which seems like a normal restriction to make."}, {'emotion': 'Anger', 'intensity': '3', 'reason': 'Rufle may lead to gunn shooting and it needs to be used by adults '}, {'emotion': 'Anger', 'intensity': '3', 'reason': 'Because putting an age limit on rifle purchases seem…
726	Protesters say security guard Jemel Roberson was proverbial 'good guy with a gun' but was fatally shot by police anyway - Daily Southtown	anonymous-source/all_shooting_images_newest/110197.jpg	[{'emotion': 'Anger', 'intensity': '4', 'reason': 'an individual that seemed to be the example of good gun ownership was still shot by police.'}, {'emotion': 'Anger', 'intensity': '3', 'reason': 'It seems like an innocent person is shot by the police '}, {'emotion': 'Sadness', 'intensity': '4', 'reason': "a 'good guy' was being shot"}, {'emotion': 'Sadness', 'intensity': '2', 'reason': "Not a lot…
729	Cruz biological mother's past a factor in school shooting	anonymous-source/all_shooting_images_newest/90014.jpg	[{'emotion': 'Sadness', 'intensity': '2', 'reason': 'in hindsight a lot can be said about signs or other things that showed there was a threat but nothing was done to prevent it before it happened.'}, {'emotion': 'Sadness', 'intensity': '2', 'reason': 'The influence of the past is a factor of the shooting, making me think of the mental illness the shooter may have'}, {'emotion': 'Anger', 'intensi…
733	Trump's indefensible response to the synagogue shooting draws outrage	anonymous-source/all_shooting_images_newest/100095.jpg	[{'emotion': 'Anger', 'intensity': '4', 'reason': 'Trump seems to have made an offensive or ignorant remark about the shooting.'}, {'emotion': 'Disgust', 'intensity': '3', 'reason': 'I do not really like president Trump'}, {'emotion': 'Disgust', 'intensity': '4', 'reason': 'Indefensible response by a person held in a responsible position that draws outrage is disgusting'}, {'emotion': 'Disgust', …
736	Vigil held for victims of California bar shooting	anonymous-source/all_shooting_images_newest/110235.jpg	[{'emotion': 'Sadness', 'intensity': '2', 'reason': 'there was another shooting and the headline makes it sound like a normal event.'}, {'emotion': 'Sadness', 'intensity': '3', 'reason': 'reminds me of the shooting '}, {'emotion': 'Sadness', 'intensity': '4', 'reason': 'Felt sad for victims of California bar shooting'}, {'emotion': 'Sadness', 'intensity': '4', 'reason': 'so sad that the shooting …
737	The NRA is using Trump s playbook to attack the news media. It must be getting desperate.	anonymous-source/all_shooting_images_newest/10601.jpg	[{'emotion': 'Contentment', 'intensity': '3', 'reason': 'the NRA may be getting desperate in their attacks on the news media which may be because their ideas are getting unpopular.'}, {'emotion': 'Amusement', 'intensity': '1', 'reason': "It is somehow funny because the using of Trump's playbook"}, {'emotion': 'Disgust', 'intensity': '3', 'reason': 'Attacking news media is disgusting.'}, {'emotion…
738	Survivors of Parkland Massacre Held Event Last Month at Site of Jacksonville Mass Shooting	anonymous-source/all_shooting_images_newest/220.jpg	[{'emotion': 'Awe', 'intensity': '2', 'reason': 'survivors are pushing for their ideals and letting their voices be heard.'}, {'emotion': 'Sadness', 'intensity': '2', 'reason': 'Remind me of the gun shooting and how it will impact people'}, {'emotion': 'Contentment', 'intensity': '3', 'reason': 'The survivors gathered again and held and event after the massacre.'}, {'emotion': 'Sadness', 'intensi…
740	Unbearable grief': Pakistani parents of Santa Fe school shooting victim warn of gun culture in US	anonymous-source/all_shooting_images_newest/110117.jpg	[{'emotion': 'Anger', 'intensity': '1', 'reason': 'this should not have been happen'}, {'emotion': 'Amusement', 'intensity': '3', 'reason': 'IDK'}, {'emotion': 'Sadness', 'intensity': '3', 'reason': 'Not proud to be an American. We seem so forward thinking and then you come across issues like gun violence.'}, {'emotion': 'Sadness', 'intensity': '4', 'reason': 'Parents are filling disability about…
759	Family outraged after police kill black man mistaken for mall shooter	anonymous-source/all_shooting_images_newest/110433.jpg	[{'emotion': 'Anger', 'intensity': '3', 'reason': "It's racism."}, {'emotion': 'Anger', 'intensity': '4', 'reason': 'it demonstrates the harmful generalization US law enforcement makes about black people.'}, {'emotion': 'Anger', 'intensity': '3', 'reason': 'I feel anger towards the policemen because of the decision he took and that he based race on it '}, {'emotion': 'Anger', 'intensity': '3', 'r…
761	Marco Rubio, Bill Nelson push states to get gun restraining order laws	anonymous-source/all_shooting_images_newest/10802.jpg	[{'emotion': 'Contentment', 'intensity': '3', 'reason': 'Gun should be banned in this country.'}, {'emotion': 'Excitement', 'intensity': '5', 'reason': 'I believe gun control is something we have needed for a song time.'}, {'emotion': 'Contentment', 'intensity': '3', 'reason': 'that laws against guns are being supported '}, {'emotion': 'Contentment', 'intensity': '3', 'reason': 'pro-social behavi…
763	U.S. judge extends ban of online 3-D printed gun blueprints	anonymous-source/all_shooting_images_newest/260.jpg	[{'emotion': 'Excitement', 'intensity': '3', 'reason': '3-D printed gun is also dangerous.'}, {'emotion': 'Awe', 'intensity': '3', 'reason': 'I was unaware of the existence of 3-D printed guns.'}, {'emotion': 'Contentment', 'intensity': '3', 'reason': 'this headline shows that not only the distribution of guns is being looked at but also production '}, {'emotion': 'Contentment', 'intensity': '3',…
764	Student activists say they will withdraw from NRA protest due to threats: report	anonymous-source/all_shooting_images_newest/140.jpg	[{'emotion': 'Anger', 'intensity': '3', 'reason': 'Students are doing the right things but someone threatened them? really?'}, {'emotion': 'Fear', 'intensity': '4', 'reason': 'it shows how threatening guns are to safety.'}, {'emotion': 'Fear', 'intensity': '3', 'reason': 'It is so sad that students who decided to take an action are being threatened. '}, {'emotion': 'Sadness', 'intensity': '2', 'r…
768	Dems Speak Out Against Gun Violence, Hate Crimes In Aftermath Of Pittsburgh Shooting	anonymous-source/all_shooting_images_newest/100305.jpg	[{'emotion': 'Contentment', 'intensity': '3', 'reason': 'Gun should be banned in this country not just gun violence.'}, {'emotion': 'Contentment', 'intensity': '4', 'reason': 'it makes me proud to be a democrat.'}, {'emotion': 'Fear', 'intensity': '3', 'reason': 'the news are very tragic and the idea of hate crimes is scary'}, {'emotion': 'Fear', 'intensity': '2', 'reason': 'hate crime'}, {'emoti…
770	Justice Department rolls out new effort to counter gun violence	anonymous-source/all_shooting_images_newest/10017.jpg	[{'emotion': 'Contentment', 'intensity': '3', 'reason': 'Yes, the department should start paying efforts on countering gun violence.'}, {'emotion': 'Excitement', 'intensity': '5', 'reason': 'it shows a step in the right direction.'}, {'emotion': 'Contentment', 'intensity': '3', 'reason': 'that more action is being taken'}, {'emotion': 'Contentment', 'intensity': '3', 'reason': 'pro social act'}, …
771	Trump Blames Democrats For Lack Of Gun Control Laws	anonymous-source/all_shooting_images_newest/10810.jpg	[{'emotion': 'Amusement', 'intensity': '3', 'reason': 'They are always blaming and blaming but do nothing.'}, {'emotion': 'Anger', 'intensity': '5', 'reason': 'this is simply a lie.'}, {'emotion': 'Anger', 'intensity': '3', 'reason': 'it is easy to blame a group, but that game could be played for years while the main issue is being ignored '}, {'emotion': 'Disgust', 'intensity': '3', 'reason': 'i…
773	Maker of 3D-printed guns begins selling blueprints, despite court order	anonymous-source/all_shooting_images_newest/262.jpg	[{'emotion': 'Anger', 'intensity': '3', 'reason': 'The maker should be arrested.'}, {'emotion': 'Anger', 'intensity': '4', 'reason': 'it demonstrates the privilege that some people have that allows them to blatantly disobey the law.'}, {'emotion': 'Sadness', 'intensity': '3', 'reason': "it is sad to hear this type of news because it is something that can't be avoided. People will always find a wa…
774	Protesters march on Lake Shore Drive to call attention to gun violence	anonymous-source/all_shooting_images_newest/231.jpg	[{'emotion': 'Contentment', 'intensity': '3', 'reason': 'I think the government should do something about gun control.'}, {'emotion': 'Contentment', 'intensity': '4', 'reason': 'it is good to see people speaking up for what they believe in.'}, {'emotion': 'Excitement', 'intensity': '3', 'reason': 'Marches are a peaceful way to protest. It is good to hear they are happening'}, {'emotion': 'Content…
780	For Parents of Shooting Victims, a Support Network That Keeps Growing	anonymous-source/all_shooting_images_newest/10483.jpg	[{'emotion': 'Sadness', 'intensity': '3', 'reason': 'feel sad for those lost their children'}, {'emotion': 'Contentment', 'intensity': '4', 'reason': 'This makes me happy because it is encouraging to see that people who have been affected by gun violence are able to receive support.'}, {'emotion': 'Sadness', 'intensity': '1', 'reason': 'the growing amount of people who have lost loved ones due to…
783	Florida sheriff: The Parkland massacre could have been avoided if someone else had a gun	anonymous-source/all_shooting_images_newest/373.jpg	[{'emotion': 'Sadness', 'intensity': '4', 'reason': 'feel sad because of the massacre '}, {'emotion': 'Anger', 'intensity': '4', 'reason': "I feel angry because I don't think that statement is true. I don't think it is all about self defense, rather than starting at the root of why are guns so accessible."}, {'emotion': 'Disgust', 'intensity': '1', 'reason': "I don't think that the devastating em…
784	Justices Won t Hear Case on Waiting Period for Gun Purchases	anonymous-source/all_shooting_images_newest/10183.jpg	[{'emotion': 'Anger', 'intensity': '5', 'reason': "The government doesn't care about the gun violence."}, {'emotion': 'Anger', 'intensity': '2', 'reason': 'This makes me angry because it seems like the issue of gun violence is not being directly addressed at the justice system or they are just overlooking it.'}, {'emotion': 'Fear', 'intensity': '1', 'reason': 'Unfamiliar with the exact logistics …
785	Florida Senate rejects ban on assault weapons, votes to arm teachers	anonymous-source/all_shooting_images_newest/10642.jpg	[{'emotion': 'Anger', 'intensity': '3', 'reason': "The government doesn't care about the gun violence."}, {'emotion': 'Anger', 'intensity': '4', 'reason': "This makes me angry because I don't think arming teachings is the solution to the gun violence issue."}, {'emotion': 'Fear', 'intensity': '1', 'reason': 'School environments are extremely unpredictable and arming schoolteachers on such a grand…
786	Las Vegas shooting victims honored in emotional anniversary ceremony: 'Our 58 angels are with us'	anonymous-source/all_shooting_images_newest/100497.jpg	[{'emotion': 'Sadness', 'intensity': '3', 'reason': 'sad for these who died'}, {'emotion': 'Sadness', 'intensity': '4', 'reason': 'This makes me feel sad because innocent lives did not have to be lost due to gun violence.'}, {'emotion': 'Sadness', 'intensity': '1', 'reason': 'Facing the possibility of lives being lost so suddenly due to gun violence.'}, {'emotion': 'Sadness', 'intensity': '5', 'r…
791	Senators offer bill that could block gun sales to people seen as risks	anonymous-source/all_shooting_images_newest/10497.jpg	[{'emotion': 'Contentment', 'intensity': '5', 'reason': 'agree with the proposal'}, {'emotion': 'Excitement', 'intensity': '4', 'reason': 'I feel happy because I support this bill and the message behind it.'}, {'emotion': 'Contentment', 'intensity': '1', 'reason': 'Law could possibly prevent gun violence incidents perpetrated by unstable individuals.'}, {'emotion': 'Contentment', 'intensity': '4'…
795	Why some schools are suspending kids for joining gun control walkouts	anonymous-source/all_shooting_images_newest/10661.jpg	[{'emotion': 'Sadness', 'intensity': '2', 'reason': 'feel sad because children should be given lessons'}, {'emotion': 'Sadness', 'intensity': '2', 'reason': 'This makes me sad that schools would not allow students to support something that is trying to raise awareness/ save lives.'}, {'emotion': 'Anger', 'intensity': '1', 'reason': 'upset at the degree of control schools have over students and th…
796	Temple Israel, Gary community mourns Pittsburgh shooting victims: 'We come together to condemn the violence and hate'	anonymous-source/all_shooting_images_newest/110007.jpg	[{'emotion': 'Sadness', 'intensity': '3', 'reason': 'feel sad about the gun violence '}, {'emotion': 'Sadness', 'intensity': '4', 'reason': 'this makes me sad because gun violence and hate crimes have started to go hand in hand which is scary and upsetting for minorities.'}, {'emotion': 'Sadness', 'intensity': '1', 'reason': 'ubiquitous threat of losing loved ones and community members through gu…
805	Pittsburgh Steelers to hold moment of silence to honor victims of synagogue shooting	anonymous-source/all_shooting_images_newest/100151.jpg	[{'emotion': 'Contentment', 'intensity': '4', 'reason': 'control guns '}, {'emotion': 'Sadness', 'intensity': '4', 'reason': 'the headline has a mention of a synagogue shooting.'}, {'emotion': 'Sadness', 'intensity': '4', 'reason': 'it sure was a horrible shooting'}, {'emotion': 'Sadness', 'intensity': '1', 'reason': 'the only way that people will notice this problem is if popular personalities a…
808	Chicago sports teams donate $1 million to combat gun violence: 'We want to be invested in it' ??	anonymous-source/all_shooting_images_newest/110435.jpg	[{'emotion': 'Amusement', 'intensity': '5', 'reason': 'we need to control guns'}, {'emotion': 'Contentment', 'intensity': '2', 'reason': 'money is being donated to combat gun violence, which will be helpful to some extent.'}, {'emotion': 'Amusement', 'intensity': '3', 'reason': 'why are there two question marks '}, {'emotion': 'Excitement', 'intensity': '1', 'reason': 'that money will hopefully r…
817	Jake Paul's video about school shootings doesn't involve any actual gun control	anonymous-source/all_shooting_images_newest/10542.jpg	[{'emotion': 'Disgust', 'intensity': '4', 'reason': 'we need to do something'}, {'emotion': 'Disgust', 'intensity': '3', 'reason': 'I have a negative view of Jake and Logan Paul due to their past history on social media.'}, {'emotion': 'Amusement', 'intensity': '5', 'reason': 'what do you expect from Jake Paul'}, {'emotion': 'Disgust', 'intensity': '1', 'reason': 'why would people listen to an in…
818	The CMA Awards open with a moment of silence for the 12 people killed in Thousand Oaks shooting	anonymous-source/all_shooting_images_newest/110439.jpg	[{'emotion': 'Sadness', 'intensity': '5', 'reason': 'so many people die'}, {'emotion': 'Sadness', 'intensity': '3', 'reason': 'the effects of gun violence are felt on a national level and shown on national television broadcasting.'}, {'emotion': 'Sadness', 'intensity': '4', 'reason': "it's a sad thing"}, {'emotion': 'Sadness', 'intensity': '1', 'reason': 'always there are tragedies and moments of…
822	Republican Governor Blames Mass Shootings On Zombies, Abortions, US 'Culture of Death' Not Guns	anonymous-source/all_shooting_images_newest/110152.jpg	[{'emotion': 'Disgust', 'intensity': '3', 'reason': 'This is just nonsense for a person that is high-up like the governor to make such excuse.'}, {'emotion': 'Anger', 'intensity': '3', 'reason': 'spread of misinformation '}, {'emotion': 'Disgust', 'intensity': '3', 'reason': 'He was trying to find excuses for gun violence.'}, {'emotion': 'Anger', 'intensity': '3', 'reason': 'guns let people crazy…
827	Companies develop bulletproof clothing to protect against shootings	anonymous-source/all_shooting_images_newest/10506.jpg	[{'emotion': 'Sadness', 'intensity': '3', 'reason': 'It seems to me that the companies are using the victims of these mass shootings as free advertisement for their product.'}, {'emotion': 'Excitement', 'intensity': '3', 'reason': 'interested in how it works, excited for deployment'}, {'emotion': 'Fear', 'intensity': '4', 'reason': 'It shows how serious how firearms problem is.'}, {'emotion': 'Sa…
845	Victims of the Marjorie Stoneman Douglas School shooting receive posthumous degrees Video	anonymous-source/all_shooting_images_newest/10543.jpg	[{'emotion': 'Disgust', 'intensity': '4', 'reason': 'who would send posthumous degrees videos to them? (however, i had to search up posthumous to understand what it means)'}, {'emotion': 'Sadness', 'intensity': '2', 'reason': 'feels sorry for those who died but at least they have some comforts'}, {'emotion': 'Sadness', 'intensity': '5', 'reason': 'I feel so sorry for these students, because they …
847	Parkland students honor those lost at graduation, plan next phase for their gun-control movement	anonymous-source/all_shooting_images_newest/10149.jpg	[{'emotion': 'Excitement', 'intensity': '4', 'reason': 'they are finally planning to prevent the happening of gun violence again'}, {'emotion': 'Sadness', 'intensity': '2', 'reason': 'very sorry for those who died and those who lost their love ones'}, {'emotion': 'Sadness', 'intensity': '4', 'reason': 'I feel sad that too many innocent people got hurt because of the gun violence, and one day me o…
853	L.A. councilman wants to make it illegal to download blueprints for a printable gun	anonymous-source/all_shooting_images_newest/395.jpg	[{'emotion': 'Amusement', 'intensity': '1', 'reason': 'want to read more, and pretty surprised to see someone against printable guns'}, {'emotion': 'Contentment', 'intensity': '3', 'reason': 'it is the right thing to do, knowing they will do this makes me feel more safe'}, {'emotion': 'Contentment', 'intensity': '3', 'reason': 'I feel like this is the right thing to do. This reduces the likelihoo…
854	Chicago activists shut down Lake Shore Drive, speak out against gun violence at Wrigley	anonymous-source/all_shooting_images_newest/340.jpg	[{'emotion': 'Contentment', 'intensity': '4', 'reason': '"speak out" makes the headline feel forceful and powerful'}, {'emotion': 'Awe', 'intensity': '2', 'reason': 'proud for those who speak up for what they believe '}, {'emotion': 'Excitement', 'intensity': '4', 'reason': 'I feel that it is important to have more people speaking against gun violence, so the peer pressure will reduce the potenti…
857	Cubs star Anthony Rizzo issues strongest call yet for gun control: 'It s too easy to get a gun'	anonymous-source/all_shooting_images_newest/10177.jpg	[{'emotion': 'Excitement', 'intensity': '3', 'reason': 'more people are aware of gun control; especially a famous person standing up for the cause is extremely helpful'}, {'emotion': 'Awe', 'intensity': '3', 'reason': 'it is very nice to have a celebrity caring about gun issue '}, {'emotion': 'Awe', 'intensity': '3', 'reason': 'I strongly agree with his idea. It is way too easy to have a gun in t…
860	Somber tributes, dimmed lights on Vegas shooting anniversary	anonymous-source/all_shooting_images_newest/100435.jpg	[{'emotion': 'Sadness', 'intensity': '5', 'reason': 'The Vegas shooting in which so many people were killed, injured, and traumatized, makes me really sad.'}, {'emotion': 'Fear', 'intensity': '3', 'reason': 'fear'}, {'emotion': 'Contentment', 'intensity': '3', 'reason': 'content'}, {'emotion': 'Sadness', 'intensity': '3', 'reason': 'people are mourning for the victims'}, {'emotion': 'Sadness', 'i…
865	Generation Z reported the most mental health problems, and gun violence is the biggest stressor	anonymous-source/all_shooting_images_newest/100017.jpg	[{'emotion': 'Sadness', 'intensity': '4', 'reason': 'I relate to this. I am incredibly terrified of gun violence.'}, {'emotion': 'Fear', 'intensity': '3', 'reason': 'fear'}, {'emotion': 'Awe', 'intensity': '3', 'reason': 'awe'}, {'emotion': 'Sadness', 'intensity': '3', 'reason': 'both the two problems are very important'}, {'emotion': 'Sadness', 'intensity': '4', 'reason': 'I too am fearful of gu…
866	Grief and Self-Doubt Follow Shooting at Trenton Arts Festival	anonymous-source/all_shooting_images_newest/10450.jpg	[{'emotion': 'Sadness', 'intensity': '4', 'reason': "It is so sad that there are mass shootings at all. And then on top of that at these art festivals that are supposed to be celebrating people's crafts and talents and showcasing their work. People are supposed to be enjoying themselves."}, {'emotion': 'Fear', 'intensity': '3', 'reason': 'fear'}, {'emotion': 'Awe', 'intensity': '3', 'reason': 'aw…
868	Lake County high school student arrested with ammo, middle-schooler busted for threatening to shoot students	anonymous-source/all_shooting_images_newest/90290.jpg	[{'emotion': 'Fear', 'intensity': '5', 'reason': 'That is terrifying!!! High schoolers, middle schoolers with ammo, threatening to shoot-up schools. That is absolutely outrageous!!!'}, {'emotion': 'Fear', 'intensity': '3', 'reason': 'fear'}, {'emotion': 'Awe', 'intensity': '3', 'reason': 'awe'}, {'emotion': 'Fear', 'intensity': '4', 'reason': 'a student wants to conduct the shooting'}, {'emotion'…
870	Dentist Killed in Pittsburgh Synagogue Shooting Tried to 'Heal the World' With Work Treating Immigrants and Refugees	anonymous-source/all_shooting_images_newest/100437.jpg	[{'emotion': 'Sadness', 'intensity': '5', 'reason': 'This is just so messed up. That is so incredibly sad, hearing a story of a medical professional just trying to do some good and help people in need getting killed. And getting shot in a synagogue, which is supposed to be a place of peace, worship, and safety.'}, {'emotion': 'Fear', 'intensity': '3', 'reason': 'fear'}, {'emotion': 'Awe', 'intens…
879	White man pulls gun in confrontation with black Florida A&M students	anonymous-source/all_shooting_images_newest/90451.jpg	[{'emotion': 'Fear', 'intensity': '3', 'reason': 'fear'}, {'emotion': 'Anger', 'intensity': '4', 'reason': 'besides threatening students with guns, the issue of inequality is not taken seriously.'}, {'emotion': 'Anger', 'intensity': '4', 'reason': 'it is hard not to see this problem as a racially motivated attack. '}, {'emotion': 'Anger', 'intensity': '4', 'reason': 'the action is related to gun …
880	Parkland shooting survivor gives powerful testimony at Kavanaugh hearings	anonymous-source/all_shooting_images_newest/90424.jpg	[{'emotion': 'Fear', 'intensity': '3', 'reason': 'fear'}, {'emotion': 'Awe', 'intensity': '4', 'reason': 'even though the survivor has experienced gun shooting, he still provides testimony to advocate for further protection.'}, {'emotion': 'Awe', 'intensity': '4', 'reason': 'even after going through such an awful experience and giving a testimonial in front of a man who does not care about what y…
883	Pittsburgh shooting: 11 dead in synagogue attack with suspect Rob Bowers to face federal hate crime charges	anonymous-source/all_shooting_images_newest/100322.jpg	[{'emotion': 'Fear', 'intensity': '3', 'reason': 'fear'}, {'emotion': 'Sadness', 'intensity': '4', 'reason': 'people died in synagogue attack only because of hate crimes.'}, {'emotion': 'Anger', 'intensity': '4', 'reason': 'it is not fair for the people who lost their lives and their families. This should never have happened in the first place and it is so confusing that gun reform is still a que…
885	Pro-gun advocates are stepping up their attacks on Parkland students David Hogg and Emma Gonz??lez.	anonymous-source/all_shooting_images_newest/10811.jpg	[{'emotion': 'Fear', 'intensity': '3', 'reason': 'fear'}, {'emotion': 'Anger', 'intensity': '2', 'reason': 'pro-gun advocates have no right to attack students.'}, {'emotion': 'Anger', 'intensity': '4', 'reason': 'these are adults attacking children who lost so much at a very young age. The fact that this is a headline is disappointing to see. '}, {'emotion': 'Anger', 'intensity': '3', 'reason': '…
888	Jenelle Evans' Ex Seeks Full Custody After She Pulls Gun in Front of Son During Road Rage Incident	anonymous-source/all_shooting_images_newest/393.jpg	[{'emotion': 'Fear', 'intensity': '3', 'reason': 'fear'}, {'emotion': 'Fear', 'intensity': '4', 'reason': 'it will definitely cause chaos and panic to both his family and neighbors with his weapons.'}, {'emotion': 'Fear', 'intensity': '4', 'reason': 'gun violence is not only happening in schools but also in homes where families are raising children. Gun violence should not be a concept that young…
896	Carpenter erects wooden crosses in honor of shooting rampage victims	anonymous-source/all_shooting_images_newest/110405.jpg	[{'emotion': 'Fear', 'intensity': '3', 'reason': 'fear'}, {'emotion': 'Awe', 'intensity': '4', 'reason': 'victims are still being cared and remembered by everyone.'}, {'emotion': 'Sadness', 'intensity': '4', 'reason': 'every time I read a headline about a shooting I lose faith in this country and their lack of effort to push for gun control. '}, {'emotion': 'Sadness', 'intensity': '3', 'reason': …
899	I think I'm going to kill the president,' Utah man allegedly told police after 6 guns found in car: reports	anonymous-source/all_shooting_images_newest/90303.jpg	[{'emotion': 'Fear', 'intensity': '3', 'reason': 'Everything about gun violence makes me nervous'}, {'emotion': 'Fear', 'intensity': '3', 'reason': 'Bad people could use guns to hurt others.'}, {'emotion': 'Sadness', 'intensity': '3', 'reason': 'people use violence to solve problem'}, {'emotion': 'Fear', 'intensity': '3', 'reason': 'why are people carrying guns around '}, {'emotion': 'Fear', 'int…
909	1 year after Vegas shooting, survivors describe 'new normal'	anonymous-source/all_shooting_images_newest/90409.jpg	[{'emotion': 'Fear', 'intensity': '3', 'reason': 'Everything about gun violence makes me nervous'}, {'emotion': 'Contentment', 'intensity': '3', 'reason': 'Good thing for gun controll.'}, {'emotion': 'Sadness', 'intensity': '3', 'reason': 'they can never be the same as before'}, {'emotion': 'Sadness', 'intensity': '3', 'reason': 'that their lives has permanently changed because of shooting '}, {'…
930	New York Gov. Cuomo calls on states to outlaw NRA-branded insurance coverage	anonymous-source/all_shooting_images_newest/86.jpg	[{'emotion': 'Contentment', 'intensity': '4', 'reason': '/'}, {'emotion': 'Contentment', 'intensity': '3', 'reason': 'good'}, {'emotion': 'Contentment', 'intensity': '3', 'reason': 'it might reduce accidents with gun'}, {'emotion': 'Contentment', 'intensity': '2', 'reason': 'I like seeing efforts to reducing gun violence being made but it is unfortunate certain businesses have to suffer'}, {'emot…
934	Memorial in downtown Las Vegas honors victims of October shooting rampage	anonymous-source/all_shooting_images_newest/90459.jpg	[{'emotion': 'Awe', 'intensity': '4', 'reason': '/'}, {'emotion': 'Sadness', 'intensity': '5', 'reason': 'poor families'}, {'emotion': 'Sadness', 'intensity': '3', 'reason': 'remembering those who lost their lives'}, {'emotion': 'Sadness', 'intensity': '3', 'reason': 'it reminded me of the horrific events that happened in Vegas'}, {'emotion': 'Sadness', 'intensity': '3', 'reason': 'seeing the vic…
937	This Is Us Emotionally Honors Pittsburgh After Deadly Synagogue Shooting	anonymous-source/all_shooting_images_newest/110367.jpg	[{'emotion': 'Fear', 'intensity': '4', 'reason': '/'}, {'emotion': 'Sadness', 'intensity': '4', 'reason': 'sadly they died'}, {'emotion': 'Sadness', 'intensity': '3', 'reason': 'it is always very emotional to remind us of shootings'}, {'emotion': 'Sadness', 'intensity': '3', 'reason': 'I thought of the poor victims of the shooting'}, {'emotion': 'Sadness', 'intensity': '3', 'reason': 'seeing the …
938	Gunman casually bought water moments before massacre that wounded Gabrielle Giffords, new FBI video shows	anonymous-source/all_shooting_images_newest/10357.jpg	[{'emotion': 'Anger', 'intensity': '5', 'reason': 'I hate that shootings happen'}, {'emotion': 'Fear', 'intensity': '3', 'reason': 'Murderers lived in us and hurt others at anytime.'}, {'emotion': 'Fear', 'intensity': '5', 'reason': 'It is scary that he was "casually" buying water and just performing an everyday task moments before a massacre.'}, {'emotion': 'Fear', 'intensity': '3', 'reason': 'E…
940	South Carolina congressman draws gun at constituent meeting	anonymous-source/all_shooting_images_newest/10309.jpg	[{'emotion': 'Disgust', 'intensity': '5', 'reason': 'Its awful that people draw guns in public but it is especially heinous for an elected official to do this'}, {'emotion': 'Fear', 'intensity': '3', 'reason': 'Bad thing for gun controll.'}, {'emotion': 'Fear', 'intensity': '3', 'reason': "I don't know the context, but it would be scary if it were in self-defense or just randomly."}, {'emotion': …
946	Former student accused of bringing replica gun into Oswego High School	anonymous-source/all_shooting_images_newest/287.jpg	[{'emotion': 'Sadness', 'intensity': '5', 'reason': 'its sad that a student would do this and that children are exposed to guns so early'}, {'emotion': 'Fear', 'intensity': '3', 'reason': 'Students should not have guns.'}, {'emotion': 'Fear', 'intensity': '4', 'reason': 'It is scary that anyone can walk onto campus with a gun.'}, {'emotion': 'Fear', 'intensity': '3', 'reason': 'Everything about g…
948	Florida school shooting suspect was investigated by state after self-harming	anonymous-source/all_shooting_images_newest/10395.jpg	[{'emotion': 'Anger', 'intensity': '5', 'reason': "its sad that the state looked into this shooter and didn't prevent this"}, {'emotion': 'Fear', 'intensity': '3', 'reason': 'People with mental illness could hurt people.'}, {'emotion': 'Fear', 'intensity': '5', 'reason': 'School shootings are scary!'}, {'emotion': 'Fear', 'intensity': '3', 'reason': 'Everything about gun violence makes me nervous…
949	Smith & Wesson revenue from long-gun sales fell 50 percent this year: report	anonymous-source/all_shooting_images_newest/200.jpg	[{'emotion': 'Excitement', 'intensity': '3', 'reason': 'I want gun sellers to lose money'}, {'emotion': 'Contentment', 'intensity': '3', 'reason': 'Good thing for gun controll.'}, {'emotion': 'Contentment', 'intensity': '1', 'reason': 'It makes me feel somewhat less bad to know that gun sales were dropping, so hopefully less people have guns.'}, {'emotion': 'Sadness', 'intensity': '3', 'reason': …
951	As a Federal Judge Blocks 3D Gun Blueprints, Trump Shifts Away From the NRA	anonymous-source/all_shooting_images_newest/339.jpg	[{'emotion': 'Excitement', 'intensity': '4', 'reason': "I'm glad that a judge blocked 3D gun blueprints and that trump shifted away from the nra"}, {'emotion': 'Contentment', 'intensity': '3', 'reason': 'Good thing for gun controll.'}, {'emotion': 'Disgust', 'intensity': '1', 'reason': 'Why would he switch after that? But also good that judge blocked those blueprints.'}, {'emotion': 'Fear', 'inte…
952	Texas official blames school shooting on too many exits and entrances	anonymous-source/all_shooting_images_newest/10367.jpg	[{'emotion': 'Disgust', 'intensity': '5', 'reason': "fault for mass shootings are on easy access to guns, the glorification of guns, and gunmans not exits and it's disgusting for officials to assert this"}, {'emotion': 'Anger', 'intensity': '3', 'reason': 'Shame for the unresponsible goverment.'}, {'emotion': 'Disgust', 'intensity': '3', 'reason': 'It makes me scared that that is what they are fo…
954	Do Gun Control Laws Save Lives? Major Study Says Lack Of Federal Funding For Research Means We Still Don't Know	anonymous-source/all_shooting_images_newest/10394.jpg	[{'emotion': 'Anger', 'intensity': '5', 'reason': 'its so upsetting that they wont even invest into finding out if/what gun control measures work'}, {'emotion': 'Sadness', 'intensity': '3', 'reason': 'Bad thing for gun controll.'}, {'emotion': 'Fear', 'intensity': '3', 'reason': 'It is scary that the government does not prioritize this enough to fund it.'}, {'emotion': 'Fear', 'intensity': '3', '…
955	Pittsburgh synagogue gunman said he wanted all Jews to die, criminal complaint says	anonymous-source/all_shooting_images_newest/100354.jpg	[{'emotion': 'Disgust', 'intensity': '5', 'reason': 'this is such a disgusting and heinous thing to say'}, {'emotion': 'Fear', 'intensity': '3', 'reason': 'Bad people use guns to hurt others.'}, {'emotion': 'Fear', 'intensity': '5', 'reason': 'That type of discrimination, pure hatred, and violence is TERRIFYING.'}, {'emotion': 'Fear', 'intensity': '3', 'reason': 'Everything about gun violence mak…
956	US schools implement new safety measures in wake of recent mass shootings	anonymous-source/all_shooting_images_newest/358.jpg	[{'emotion': 'Sadness', 'intensity': '5', 'reason': 'its sad that kids have to deal with this'}, {'emotion': 'Contentment', 'intensity': '3', 'reason': 'Good thing for studnets safety.'}, {'emotion': 'Contentment', 'intensity': '2', 'reason': 'New safety measure are hopefully good and will help protect students, but still scary that it even had to come to that.'}, {'emotion': 'Fear', 'intensity':…
962	Shootings Thrust Gun Control Into Campaign Ads	anonymous-source/all_shooting_images_newest/90226.jpg	[{'emotion': 'Contentment', 'intensity': '4', 'reason': "Gun control should be campaigned for because it will decrease the amount of deaths in the United States by a large margin. I'm glad that some organizations are taking action."}, {'emotion': 'Contentment', 'intensity': '4', 'reason': 'Action is finally being taken against guns.'}, {'emotion': 'Contentment', 'intensity': '4', 'reason': 'Do no…
980	Televised meetings over school shootings are cathartic, but change nothing	anonymous-source/all_shooting_images_newest/10499.jpg	[{'emotion': 'Sadness', 'intensity': '3', 'reason': "it's hard to change other people's established beliefs."}, {'emotion': 'Awe', 'intensity': '2', 'reason': 'I would like to hear why these meetings "change nothing" and their evidence. '}, {'emotion': 'Sadness', 'intensity': '3', 'reason': 'I feel sad that shootings occur. I feel anger and disgust when shootings occur without anything I can do a…
983	In a rare move, corporate America presses for gun-control restrictions 'to take a stand'	anonymous-source/all_shooting_images_newest/10238.jpg	[{'emotion': 'Contentment', 'intensity': '3', 'reason': "corporate usually doesn't care for gun control be that was great."}, {'emotion': 'Contentment', 'intensity': '3', 'reason': 'I am in favor of businesses taking a stand on gun-control measures. '}, {'emotion': 'Excitement', 'intensity': '1', 'reason': 'I am glad when positive changes are made, but also cynical of the intensions of large enti…
985	Pittsburgh holds last funeral in synagogue shooting for oldest victim	anonymous-source/all_shooting_images_newest/110057.jpg	[{'emotion': 'Sadness', 'intensity': '3', 'reason': 'No victim deserves that.'}, {'emotion': 'Sadness', 'intensity': '4', 'reason': 'I am saddened to remember this horrible shooting.'}, {'emotion': 'Sadness', 'intensity': '2', 'reason': 'I feel slightly content over the positive aspect of the event. I feel sadness and anger over the origin of the event.'}, {'emotion': 'Sadness', 'intensity': '3',…
988	Suspect in Madden 19 tournament shooting targeted gamers: Sheriff	anonymous-source/all_shooting_images_newest/201.jpg	[{'emotion': 'Fear', 'intensity': '3', 'reason': 'I am a gamer myself and I do go to game tournaments.'}, {'emotion': 'Sadness', 'intensity': '4', 'reason': 'I am disturbed that an individual would target their victims such as this.'}, {'emotion': 'Sadness', 'intensity': '3', 'reason': 'Shootings make me feel all these emotions. There is also no positive aspect of this event.'}, {'emotion': 'Fear…
990	Donald Trump stokes a totally false idea on the 2nd Amendment in CPAC speech	anonymous-source/all_shooting_images_newest/10509.jpg	[{'emotion': 'Amusement', 'intensity': '3', 'reason': 'any word spoken by the president should be well though out and planned instead being wrong.'}, {'emotion': 'Anger', 'intensity': '4', 'reason': "I am aware of the former president's power in public speaking and how he may have increased his audience to buy guns. "}, {'emotion': 'Disgust', 'intensity': '3', 'reason': 'I feel anger and disgust …
992	No one deserves to die over a video game': survivors recall chaos of Florida shooting	anonymous-source/all_shooting_images_newest/494.jpg	[{'emotion': 'Sadness', 'intensity': '3', 'reason': 'what the title said was true.'}, {'emotion': 'Anger', 'intensity': '4', 'reason': 'I am angered at the shooter for committing their attack on innocent victims. '}, {'emotion': 'Sadness', 'intensity': '3', 'reason': "Death makes me sad and fearful. These emotions are intensified when it's needless."}, {'emotion': 'Sadness', 'intensity': '3', 're…
995	Mass shooting victims remembered at Thousand Oaks church service and memorial	anonymous-source/all_shooting_images_newest/110089.jpg	[{'emotion': 'Sadness', 'intensity': '3', 'reason': 'they did not deserved to pass away.'}, {'emotion': 'Sadness', 'intensity': '3', 'reason': 'I am sad to hear about the memorial services for yet another mass shooting event in our nation. '}, {'emotion': 'Sadness', 'intensity': '1', 'reason': 'The event itself makes me feel some contentment for the victims, but the event makes me primarily sad.'…
997	Jacksonville 'Madden' shooting: Gaming community and friends pay tribute to two victims	anonymous-source/all_shooting_images_newest/139.jpg	[{'emotion': 'Sadness', 'intensity': '3', 'reason': "it's sad that people would die over games tournaments."}, {'emotion': 'Sadness', 'intensity': '3', 'reason': 'I am saddened to hear about the details of the aftermath of the Jacksonville shooting. '}, {'emotion': 'Sadness', 'intensity': '2', 'reason': 'I am glad that the victims are honored, but the event itself makes me feel sad and disgusted'…
999	It s never going to be normal': California city in shock after gunman kills 12	anonymous-source/all_shooting_images_newest/110161.jpg	[{'emotion': 'Anger', 'intensity': '2', 'reason': 'someone was able to access a gun and kill 12 people with it, which is appalling and shocking'}, {'emotion': 'Sadness', 'intensity': '5', 'reason': 'I feel sad for all the lives lost and scared that this could happen anyone.'}, {'emotion': 'Sadness', 'intensity': '4', 'reason': 'sad how easily as 12 yr old kid is killed due to gun violence.'}, {'e…
1002	How 3-D printed guns are made and the growing security concerns they present	anonymous-source/all_shooting_images_newest/84.jpg	[{'emotion': 'Fear', 'intensity': '3', 'reason': "I am scared for my own life as well as the lives of others after reading this because these 3D printed guns might become an unregulated and easy way for anyone to produce and distribute dangerous weapons, meaning even more people might be in danger. I am angry because it seems like people are so protective of their second amendment rights that the…
1005	Florida video game contest shooting reignites gun rights debate	anonymous-source/all_shooting_images_newest/77.jpg	[{'emotion': 'Sadness', 'intensity': '2', 'reason': "I was not expecting that people would get shot at a video game contest. It is sad that people are getting shot and killed in all kinds of places, and it's scary because it could happen anywhere to anyone."}, {'emotion': 'Anger', 'intensity': '4', 'reason': 'Anger that a person had access to a gun and killed people just because they lost a tourn…
1016	Twitter Users Taunt NRA With 'Thoughts And Prayers'Amid Reports Of Financial Struggles	anonymous-source/all_shooting_images_newest/110475.jpg	[{'emotion': 'Amusement', 'intensity': '2', 'reason': "I think it's a very clever way to show people how bad the problem has gotten, how the NRA sucks in regards to gun control and how thoughts and prayers don't help and all that"}, {'emotion': 'Amusement', 'intensity': '4', 'reason': "I feel amused as I don't have that much sympathy for the NRA. "}, {'emotion': 'Amusement', 'intensity': '3', 're…
1017	Las Vegas pauses but looks ahead a year after mass shooting	anonymous-source/all_shooting_images_newest/100062.jpg	[{'emotion': 'Sadness', 'intensity': '2', 'reason': 'It mentions a mass shooting, which is saddening. '}, {'emotion': 'Sadness', 'intensity': '4', 'reason': 'I just feel sad as the Las Vegas shooting was horrible and just feel sad for the families for the victims. '}, {'emotion': 'Sadness', 'intensity': '3', 'reason': 'actions against mass shooting needs to be taken.'}, {'emotion': 'Contentment',…
1019	The Latest: Vegas shooting survivors form human chain	anonymous-source/all_shooting_images_newest/100381.jpg	[{'emotion': 'Contentment', 'intensity': '3', 'reason': 'survivors are connecting together to help each other.'}, {'emotion': 'Contentment', 'intensity': '4', 'reason': 'Seems like they are holding a powerful and emotional event. '}, {'emotion': 'Sadness', 'intensity': '3', 'reason': 'there were a lot of victims'}, {'emotion': 'Fear', 'intensity': '4', 'reason': 'Vegas shooting led to many death …
1022	A Black Security Guard Caught a Shooting Suspect. Police Arrived and Killed the Guard.	anonymous-source/all_shooting_images_newest/110369.jpg	[{'emotion': 'Anger', 'intensity': '3', 'reason': 'it makes no sense for the police to kill the guard who protected the community.'}, {'emotion': 'Disgust', 'intensity': '5', 'reason': 'The guard seemingly did nothing wrong. '}, {'emotion': 'Anger', 'intensity': '3', 'reason': 'police is suppose to be the one who protect us, not killing people who protect us'}, {'emotion': 'Anger', 'intensity': '…
1023	'Run, hide, fight': Cal State video shows how to survive active shooter	anonymous-source/all_shooting_images_newest/10809.jpg	[{'emotion': 'Contentment', 'intensity': '3', 'reason': 'teaching people how to survive from shootings is very educational and meaningful, and it gives people a sense that they are being cared and protected.'}, {'emotion': 'Sadness', 'intensity': '5', 'reason': "This isn't something people should have to know but it's valid. "}, {'emotion': 'Sadness', 'intensity': '3', 'reason': 'instead of gun c…
1032	Girlfriend: Shooter prone to violence before deadly rampage	anonymous-source/all_shooting_images_newest/110457.jpg	[{'emotion': 'Fear', 'intensity': '4', 'reason': 'it sounds scary when violence is connected to women.'}, {'emotion': 'Fear', 'intensity': '3', 'reason': 'Who is "girlfriend"? The title doesn\'t really make sense. \r\n'}, {'emotion': 'Anger', 'intensity': '3', 'reason': "suffering doesn't make it right to kill others"}, {'emotion': 'Anger', 'intensity': '4', 'reason': 'loose gun control gives peo…
1033	The absurdity of teachers carrying guns	anonymous-source/all_shooting_images_newest/10845.jpg	[{'emotion': 'Disgust', 'intensity': '4', 'reason': "people shouldn't judge others' rights on gun carrying based on their career."}, {'emotion': 'Fear', 'intensity': '3', 'reason': 'It is a clear title, and is something I can see being very controversial. '}, {'emotion': 'Sadness', 'intensity': '3', 'reason': "it doesn't make it safer"}, {'emotion': 'Sadness', 'intensity': '3', 'reason': 'even te…
1038	Meet Cody Wilson, the 'crypto-anarchist' who wants you to be able to 3D-print unregulated guns	anonymous-source/all_shooting_images_newest/130.jpg	[{'emotion': 'Sadness', 'intensity': '2', 'reason': 'Unregulated guns are undeniably bad for the health and wellbeing of the citizens of the US. '}, {'emotion': 'Fear', 'intensity': '4', 'reason': "I do not understand how Cody Wilson, the 'crypto-anarchist' would be able to 3D-print unregulated guns"}, {'emotion': 'Fear', 'intensity': '2', 'reason': "because I don't totally know what a crypto ana…
1046	Commentary: We don t need gun control; we need another Great Awakening	anonymous-source/all_shooting_images_newest/10182.jpg	[{'emotion': 'Disgust', 'intensity': '4', 'reason': 'The headline focusing on a Great awakening freaks me out because of the religious fanaticism. '}, {'emotion': 'Disgust', 'intensity': '5', 'reason': 'We do need gun control '}, {'emotion': 'Disgust', 'intensity': '4', 'reason': 'this is just a horrible title with such a violent undertone! It\'s terrifying that people think a "great awakening" i…
1056	Florida Didn't Conduct Gun Background Checks for a Year Because an Employee Couldn't Log In	anonymous-source/all_shooting_images_newest/10190.jpg	[{'emotion': 'Awe', 'intensity': '4', 'reason': 'The feeling comes down to me feeling "how could this have happened" and nothing much else. There was just lots of stupidity in the headline with nothing much to say. '}, {'emotion': 'Anger', 'intensity': '5', 'reason': 'this is outrageous. it should be illegal not to have Gun Background Checks '}, {'emotion': 'Fear', 'intensity': '4', 'reason': 'th…
1060	Texas Lt. Gov. Says Too Many Entrances Possibly To Blame In School Shooting	anonymous-source/all_shooting_images_newest/10625.jpg	[{'emotion': 'Anger', 'intensity': '3', 'reason': 'This is a pure excuse, not because the number of entrances proves the number of shootings'}, {'emotion': 'Anger', 'intensity': '4', 'reason': 'Students should not be allowed in these violent issues.'}, {'emotion': 'Anger', 'intensity': '3', 'reason': 'This is a pure excuse, not because the number of entrances proves the number of shootings'}, {'e…
1063	Citigroup restricts gun sales by business customers	anonymous-source/all_shooting_images_newest/10797.jpg	[{'emotion': 'Contentment', 'intensity': '3', 'reason': 'I support this initiative, the gun problem should be controlled from all sides'}, {'emotion': 'Contentment', 'intensity': '4', 'reason': "It's really understandable."}, {'emotion': 'Contentment', 'intensity': '3', 'reason': 'I support this initiative, the gun problem should be controlled from all sides'}, {'emotion': 'Excitement', 'intensit…
1064	Fair board to consider ban on gun shows at Del Mar Fairgrounds	anonymous-source/all_shooting_images_newest/90277.jpg	[{'emotion': 'Contentment', 'intensity': '3', 'reason': 'Gun shows are harmful and can be best restricted'}, {'emotion': 'Contentment', 'intensity': '4', 'reason': "It's understandable."}, {'emotion': 'Contentment', 'intensity': '3', 'reason': 'Gun shows are harmful and can be best restricted'}, {'emotion': 'Excitement', 'intensity': '3', 'reason': 'Excitement'}, {'emotion': 'Excitement', 'intens…
1065	Active Shooter Game Is Pulled After Angering Parkland Parents	anonymous-source/all_shooting_images_newest/10191.jpg	[{'emotion': 'Anger', 'intensity': '3', 'reason': 'Shooting games cannot be held responsible for the proliferation of guns, it is just a pastime, should not receive so much responsibility'}, {'emotion': 'Contentment', 'intensity': '4', 'reason': "It's understanble."}, {'emotion': 'Anger', 'intensity': '3', 'reason': 'Shooting games cannot be held responsible for the proliferation of guns, it is j…
1067	Warriors coach fundraising for gun control Brady PAC	anonymous-source/all_shooting_images_newest/90128.jpg	[{'emotion': 'Contentment', 'intensity': '3', 'reason': 'Public figures should best lead by example, they need to call out the gun issue'}, {'emotion': 'Contentment', 'intensity': '4', 'reason': 'He seems to be really helpful.'}, {'emotion': 'Contentment', 'intensity': '3', 'reason': 'Public figures should best lead by example, they need to call out the gun issue'}, {'emotion': 'Excitement', 'int…
1069	Las Vegas shooting: One year later, hundreds of videos traumatize some survivors	anonymous-source/all_shooting_images_newest/100366.jpg	[{'emotion': 'Anger', 'intensity': '3', 'reason': 'The psychological state of the survivors themselves is bad, and society should not make fun of them'}, {'emotion': 'Anger', 'intensity': '4', 'reason': "It's not tolerable at all."}, {'emotion': 'Anger', 'intensity': '3', 'reason': 'The psychological state of the survivors themselves is bad, and society should not make fun of them'}, {'emotion': …
1071	Sociology professor shoots himself and police say he did it to protest Trump	anonymous-source/all_shooting_images_newest/90384.jpg	[{'emotion': 'Sadness', 'intensity': '3', 'reason': 'There is no need to give up your life for Trump, there are other ways to make a protest'}, {'emotion': 'Fear', 'intensity': '4', 'reason': 'He should cherish his life, and use a better way to protest.'}, {'emotion': 'Sadness', 'intensity': '3', 'reason': 'There is no need to give up your life for Trump, there are other ways to make a protest'},…
1074	March For Our Lives founder leaves the gun control movement and expresses one big regret	anonymous-source/all_shooting_images_newest/90297.jpg	[{'emotion': 'Sadness', 'intensity': '3', 'reason': 'We need more leaders like this to help people push for a gun ban'}, {'emotion': 'Sadness', 'intensity': '4', 'reason': "It's really regretful."}, {'emotion': 'Sadness', 'intensity': '3', 'reason': 'We need more leaders like this to help people push for a gun ban'}, {'emotion': 'Excitement', 'intensity': '3', 'reason': 'Excitement'}, {'emotion':…
1075	House Dems call for first Education Committee hearing on school shootings since Sandy Hook	anonymous-source/all_shooting_images_newest/10222.jpg	[{'emotion': 'Contentment', 'intensity': '3', 'reason': 'We need more people to learn about the dangers of shootings, so hearings are the best option'}, {'emotion': 'Contentment', 'intensity': '4', 'reason': "It's really the right things to do."}, {'emotion': 'Contentment', 'intensity': '3', 'reason': 'We need more people to learn about the dangers of shootings, so hearings are the best option'},…
1076	NRA alleges financial difficulties in New York lawsuit	anonymous-source/all_shooting_images_newest/372.jpg	[{'emotion': 'Excitement', 'intensity': '3', 'reason': "I'm glad to see that the NRA is ready to abandon the New York market due to financial problems, which will be a good help to local policing"}, {'emotion': 'Anger', 'intensity': '4', 'reason': 'They should ensure the financial need of NRA.'}, {'emotion': 'Excitement', 'intensity': '3', 'reason': "I'm glad to see that the NRA is ready to aband…
1078	Mental Health Provider That Evaluated Nikolas Cruz Before Parkland Shooting To Service Florida Charter Schools	anonymous-source/all_shooting_images_newest/90131.jpg	[{'emotion': 'Fear', 'intensity': '2', 'reason': 'Because the mental health provider failed before it is risky now and is somewhat scary for the future'}, {'emotion': 'Fear', 'intensity': '3', 'reason': 'Why people will mental illness are allowed to carry guns?'}, {'emotion': 'Sadness', 'intensity': '3', 'reason': 'it reminded me of the terrible shooting that happened'}, {'emotion': 'Fear', 'inte…
1081	Brett Kavanaugh avoids shaking hands with father of Parkland shooting victim	anonymous-source/all_shooting_images_newest/90224.jpg	[{'emotion': 'Anger', 'intensity': '3', 'reason': 'Avoiding shaking hands itself is somewhat disrespectful, but especially if in the context of shaking hands with the father of a victim of a shooting'}, {'emotion': 'Anger', 'intensity': '3', 'reason': 'Why? Why Brett Kavanaugh behave so rude? any behind stories? '}, {'emotion': 'Disgust', 'intensity': '3', 'reason': 'people are so insensitive'}, …
1082	So Much Pain : A Police Family, Forever Changed by the Las Vegas Mass Shooting	anonymous-source/all_shooting_images_newest/100181.jpg	[{'emotion': 'Sadness', 'intensity': '4', 'reason': "It's sad because of how much pain the shooting has caused"}, {'emotion': 'Sadness', 'intensity': '3', 'reason': "sounds like a great loss to me. And it seems changed a lot of families' life. "}, {'emotion': 'Sadness', 'intensity': '2', 'reason': 'I thought of my family'}, {'emotion': 'Fear', 'intensity': '5', 'reason': 'I feel bad for them'}, {…
1086	New NRA President Oliver North Suggests All Iranians Are Liars	anonymous-source/all_shooting_images_newest/10647.jpg	[{'emotion': 'Disgust', 'intensity': '5', 'reason': 'it is a really xenophobic statement that is absolutely unacceptable for any high-profile person, and I would hope he gets backlash for it'}, {'emotion': 'Disgust', 'intensity': '3', 'reason': "sounds like the new president is a racist and I feel he's dangerous. "}, {'emotion': 'Disgust', 'intensity': '3', 'reason': 'that is a terrible thing to …
1089	Only 5 senators were in the room to hear Parkland shooting survivor's testimony on Kavanaugh	anonymous-source/all_shooting_images_newest/90231.jpg	[{'emotion': 'Anger', 'intensity': '4', 'reason': 'it seems pretty disrespectful not to listen to the testimony'}, {'emotion': 'Sadness', 'intensity': '3', 'reason': 'Why did only 5 present? Was the case not worthy enough for more to participate? '}, {'emotion': 'Disgust', 'intensity': '5', 'reason': 'the shooting survivors deserve better'}, {'emotion': 'Sadness', 'intensity': '4', 'reason': 'I f…
1094	School kids use #IfIDieInASchoolShooting to share thoughts on gun violence	anonymous-source/all_shooting_images_newest/10757.jpg	[{'emotion': 'Sadness', 'intensity': '2', 'reason': 'kids use this hashtag because of how frequently school shootings happen, which makes them really consider them as a possibility now.'}, {'emotion': 'Sadness', 'intensity': '4', 'reason': "I deeply feel the kids' worry about their safety on campus and I feel frustrated for my powerless of doing nothing and feel sorry for them. "}, {'emotion': 'S…
1095	Hundreds gather to honor Noel Sparks, killed in Thousand Oaks mass shooting	anonymous-source/all_shooting_images_newest/110263.jpg	[{'emotion': 'Sadness', 'intensity': '3', 'reason': 'sad because of the tragedy that happened'}, {'emotion': 'Sadness', 'intensity': '4', 'reason': 'sorry for the loss and hope no more similar tragedy happens again. '}, {'emotion': 'Sadness', 'intensity': '3', 'reason': 'it reminded me of the terrible shooting and its victims'}, {'emotion': 'Sadness', 'intensity': '4', 'reason': 'I feel bad for s…
1099	Scalise meets with Florida school shooting survivors	anonymous-source/all_shooting_images_newest/10061.jpg	[{'emotion': 'Sadness', 'intensity': '3', 'reason': 'there are many victims of shooting crime.'}, {'emotion': 'Contentment', 'intensity': '4', 'reason': 'it is not under good circumstances but it is the least he could do '}, {'emotion': 'Contentment', 'intensity': '3', 'reason': "I'm happy that the Florida shooting survivors are being given a platform to share their experiences and make a differe…
1102	A Judge Has Blocked The Release Of 3D-Printed Gun Blueprints For Now	anonymous-source/all_shooting_images_newest/459.jpg	[{'emotion': 'Contentment', 'intensity': '3', 'reason': 'more people realize that shooting has threatened people’s lives.'}, {'emotion': 'Excitement', 'intensity': '3', 'reason': '3d printed guns should be banned'}, {'emotion': 'Contentment', 'intensity': '3', 'reason': 'the judge blocking the release gives me a sense of safety and ease.'}, {'emotion': 'Contentment', 'intensity': '1', 'reason': "…
1104	Families, friends gather as more loved ones are laid to rest in wake of school shooting	anonymous-source/all_shooting_images_newest/10825.jpg	[{'emotion': 'Sadness', 'intensity': '3', 'reason': 'there are many victims of gun violence.'}, {'emotion': 'Sadness', 'intensity': '5', 'reason': 'that is horrible that families and friends have to watch their loved ones get buried for a completely preventable cause. '}, {'emotion': 'Sadness', 'intensity': '3', 'reason': "it's disheartening to see the same thing over and over again with no chang…
1105	Alabama mall shooting: Family of black man killed by police officer on Thanksgiving hires civil rights lawyer	anonymous-source/all_shooting_images_newest/110138.jpg	[{'emotion': 'Sadness', 'intensity': '3', 'reason': 'gun causes violence.'}, {'emotion': 'Sadness', 'intensity': '4', 'reason': 'sounds racially motivated'}, {'emotion': 'Sadness', 'intensity': '3', 'reason': 'the consequences of no gun regulation is saddening.'}, {'emotion': 'Sadness', 'intensity': '1', 'reason': 'there is a black man that got killed and the family lose its loved one'}, {'emotio…
1106	Florida stopped doing gun permit checks for more than a year	anonymous-source/all_shooting_images_newest/10272.jpg	[{'emotion': 'Fear', 'intensity': '3', 'reason': 'it may cause more violence.'}, {'emotion': 'Fear', 'intensity': '5', 'reason': 'that is horrible what was the purpose of not checking permits. '}, {'emotion': 'Anger', 'intensity': '3', 'reason': 'them not doing permit checks probably made the rate of violence go way up, which is angering.'}, {'emotion': 'Fear', 'intensity': '3', 'reason': 'I am w…
1110	The biggest outrage about America's gun violence is Congress' failure to do anything about it	anonymous-source/all_shooting_images_newest/10876.jpg	[{'emotion': 'Anger', 'intensity': '3', 'reason': 'there should be more actions taken to prevent gun violence.'}, {'emotion': 'Sadness', 'intensity': '4', 'reason': "I agree it is just sad that policy makers won't do anything about it "}, {'emotion': 'Contentment', 'intensity': '3', 'reason': 'I agree with the statement, even though reading it is a little frustrating and angering.'}, {'emotion': …
1115	Probe: Mercy Hospital gunman was 'disliked classmate'at fire academy, described as presenting himself in'perverted' way	anonymous-source/all_shooting_images_newest/110226.jpg	[{'emotion': 'Sadness', 'intensity': '3', 'reason': 'shooting crime may be also related to mental illness.'}, {'emotion': 'Anger', 'intensity': '5', 'reason': 'how was he able to get a gun'}, {'emotion': 'Fear', 'intensity': '3', 'reason': 'I can visualize the man in my head, which is scary and unsettling.'}, {'emotion': 'Sadness', 'intensity': '3', 'reason': "it's a sad story"}, {'emotion': 'Sad…
1117	This Is Us pays tribute to Pittsburgh shooting victims: 'We stand with out television hometown'	anonymous-source/all_shooting_images_newest/110055.jpg	[{'emotion': 'Sadness', 'intensity': '4', 'reason': 'there are many victims of gun violence.'}, {'emotion': 'Contentment', 'intensity': '3', 'reason': 'it is very thoughtful and necessary. '}, {'emotion': 'Sadness', 'intensity': '3', 'reason': "it's sad to see people trying to raise awareness of the issue but nothing ever coming out of it."}, {'emotion': 'Contentment', 'intensity': '2', 'reason':…
1119	Family of youngest bar massacre victim: 'It's not about gun control'	anonymous-source/all_shooting_images_newest/110199.jpg	[{'emotion': 'Disgust', 'intensity': '1', 'reason': 'Then what is it about? The only other option is mental health.'}, {'emotion': 'Awe', 'intensity': '3', 'reason': 'I wonder how a gun shooting victim could say that gun control is not the cause.'}, {'emotion': 'Sadness', 'intensity': '3', 'reason': "I don't know why it's about gun control."}, {'emotion': 'Sadness', 'intensity': '4', 'reason': 'I…
1122	Study: Guns send nearly 8,000 kids to ER each year in US	anonymous-source/all_shooting_images_newest/100219.jpg	[{'emotion': 'Anger', 'intensity': '3', 'reason': "I also don't like news reports on studies. News has a tendency to misconstrue studies for a multitude of reasons, so I don't pay them any attention."}, {'emotion': 'Sadness', 'intensity': '5', 'reason': 'the headline enumerates the amount of young lives that are affected by gun violence.'}, {'emotion': 'Anger', 'intensity': '3', 'reason': "If the…
1126	This Is Us Paid Emotional Tribute to the Pittsburgh Synagogue Shooting Victims	anonymous-source/all_shooting_images_newest/100100.jpg	[{'emotion': 'Sadness', 'intensity': '1', 'reason': 'It is sad that it is such a common headline.'}, {'emotion': 'Sadness', 'intensity': '2', 'reason': 'there is a mention of the Pittsburgh synagogue shooting.'}, {'emotion': 'Contentment', 'intensity': '3', 'reason': 'I am sorry for their suffering.'}, {'emotion': 'Sadness', 'intensity': '4', 'reason': 'I feel sadness about groups of people that …
1128	Black man's death: Questions remain in Alabama mall shooting	anonymous-source/all_shooting_images_newest/110233.jpg	[{'emotion': 'Sadness', 'intensity': '1', 'reason': 'It sucks that a shooting is a somewhat common headline.'}, {'emotion': 'Sadness', 'intensity': '5', 'reason': "a black man's life was lost in a mall shooting, again due to gun violence."}, {'emotion': 'Sadness', 'intensity': '3', 'reason': "I should wait for the truth from the police's investigation."}, {'emotion': 'Sadness', 'intensity': '4', …
1133	Gun Safety Advocates Notch Big Wins In Midterm Elections	anonymous-source/all_shooting_images_newest/110252.jpg	[{'emotion': 'Contentment', 'intensity': '1', 'reason': 'Winning some elections does not guarantee change.'}, {'emotion': 'Contentment', 'intensity': '2', 'reason': 'advocates for gun safety in some elections, which will hopefully change policies and laws surrounding gun control.'}, {'emotion': 'Awe', 'intensity': '3', 'reason': 'Guns should be kept safely.'}, {'emotion': 'Excitement', 'intensity…
1136	Roseanne Barr slammed for tweet calling out 'racist anti-Semitic bigotry' after synagogue shooting	anonymous-source/all_shooting_images_newest/100130.jpg	[{'emotion': 'Anger', 'intensity': '5', 'reason': "I am immediately annoyed by the usage of slammed. But if I understand correctly, she is being criticized for pointing out bigotry, which doesn't make sense."}, {'emotion': 'Amusement', 'intensity': '1', 'reason': "I would like to learn more about Roseanne Barr's comment on Twitter and the context surrounding it."}, {'emotion': 'Anger', 'intensity…
1138	On Capitol Hill, little chance of a legislative response to latest mass shooting	anonymous-source/all_shooting_images_newest/10174.jpg	[{'emotion': 'Disgust', 'intensity': '1', 'reason': "I am angry because these people don't want to react to victims in shooting. "}, {'emotion': 'Anger', 'intensity': '3', 'reason': "I hate that the government can't set into what is going on, and that they aren't responding"}, {'emotion': 'Anger', 'intensity': '4', 'reason': 'it makes me so angry that the legislature can just decide to not do any…
1146	Garth Brooks Opens 2018 CMAs With Tribute To Thousand Oaks Shooting Victims	anonymous-source/all_shooting_images_newest/110377.jpg	[{'emotion': 'Sadness', 'intensity': '5', 'reason': 'I felt sad about the past victims. I am also glad that people are still memorized these victims and trying to remember them forever using such methods '}, {'emotion': 'Sadness', 'intensity': '4', 'reason': "I wish that celebs were not having to react to gun violence. I'm happy they do, but i wish that they didn't have to "}, {'emotion': 'Sadnes…
1153	The Las Vegas Strip Will Go Dark to Honor the Victims of Last Year's Mass Shooting	anonymous-source/all_shooting_images_newest/100021.jpg	[{'emotion': 'Sadness', 'intensity': '4', 'reason': 'I am very sad about the victims. Also I am glad that people are memorizing these victims with such methods '}, {'emotion': 'Sadness', 'intensity': '4', 'reason': "I wish we didn't have to honor victims of gun violence"}, {'emotion': 'Sadness', 'intensity': '3', 'reason': 'thinking about the victims of a mass shooting makes me feel sad'}, {'emot…
1156	Walmart is selling shotgun shell holiday lights and people on social media are not happy	anonymous-source/all_shooting_images_newest/110385.jpg	[{'emotion': 'Anger', 'intensity': '3', 'reason': "I am angry and confused why walmart are selling these things that trigger people's anger "}, {'emotion': 'Disgust', 'intensity': '3', 'reason': "It seems insensitive to sell something, like they don't have awareness to whats going on"}, {'emotion': 'Disgust', 'intensity': '3', 'reason': 'I do not see the point in this; in fact, I think it is heed…
1158	Delaware lawmakers pass Beau Biden Gun Violence Protection Act	anonymous-source/all_shooting_images_newest/10018.jpg	[{'emotion': 'Contentment', 'intensity': '2', 'reason': 'The name of the act seems to support gun control'}, {'emotion': 'Amusement', 'intensity': '4', 'reason': 'we need to control guns'}, {'emotion': 'Contentment', 'intensity': '1', 'reason': 'if the law is about what I assume which is to protect against gun violence, then it is a good thing'}, {'emotion': 'Excitement', 'intensity': '3', 'reaso…
1163	Texas Church Shooter Was Ticking Time Bomb	anonymous-source/all_shooting_images_newest/10267.jpg	[{'emotion': 'Anger', 'intensity': '2', 'reason': 'If we knew that, how did we let him get a gun'}, {'emotion': 'Fear', 'intensity': '4', 'reason': 'its terrible'}, {'emotion': 'Sadness', 'intensity': '1', 'reason': "if that was the case, why wasn't anything done to defuse this bomb"}, {'emotion': 'Anger', 'intensity': '3', 'reason': 'this could have been prevented.'}, {'emotion': 'Fear', 'intens…
1165	A Parkland teacher volunteered to arm himself then left a loaded gun in a public bathroom	anonymous-source/all_shooting_images_newest/10110.jpg	[{'emotion': 'Anger', 'intensity': '5', 'reason': 'More guns is obviously not the answer, especially not giving them to the inept'}, {'emotion': 'Fear', 'intensity': '3', 'reason': 'we need to control guns'}, {'emotion': 'Disgust', 'intensity': '1', 'reason': 'an idiot with a gun is much more dangerous than a person with a gun'}, {'emotion': 'Fear', 'intensity': '4', 'reason': 'the negligence of …
1174	At Butler High School in N.C., Bullying Led to Fatal Shooting of Student, Police Say	anonymous-source/all_shooting_images_newest/100220.jpg	[{'emotion': 'Anger', 'intensity': '4', 'reason': 'No, access to a gun led to the shooting'}, {'emotion': 'Fear', 'intensity': '5', 'reason': 'guns are terrible'}, {'emotion': 'Sadness', 'intensity': '1', 'reason': 'it is often things like this that leads to pushing someone over the edge and causing tragedy to happen'}, {'emotion': 'Fear', 'intensity': '4', 'reason': "kids having access to guns w…
1177	Cremated remains of Las Vegas mass shooter to be kept in safe deposit box, brother says	anonymous-source/all_shooting_images_newest/10057.jpg	[{'emotion': 'Sadness', 'intensity': '5', 'reason': 'they can enjoy their life, but because of the gun violence, they must end their life. '}, {'emotion': 'Disgust', 'intensity': '2', 'reason': "I don't care about the remains of this awful person.f"}, {'emotion': 'Sadness', 'intensity': '2', 'reason': 'I feel sad for people died in Las Vegas mass shooter.'}, {'emotion': 'Contentment', 'intensity'…
1179	Florida lawmakers agree to advance bill to restrict gun purchases	anonymous-source/all_shooting_images_newest/10233.jpg	[{'emotion': 'Excitement', 'intensity': '5', 'reason': 'the restriction can make less people suffered in gun violence. '}, {'emotion': 'Contentment', 'intensity': '2', 'reason': 'It should be incredibly difficult to purchase a gun.'}, {'emotion': 'Contentment', 'intensity': '4', 'reason': 'I am happy that the lawmakers are trying to decreasing gun violence .'}, {'emotion': 'Contentment', 'intensi…
1182	Why Australia's famed gun control laws probably wouldn't reduce shooting deaths in America	anonymous-source/all_shooting_images_newest/90194.jpg	[{'emotion': 'Fear', 'intensity': '5', 'reason': 'when just reading the heading, i will feel scared about it because i will wonder why this can happen? '}, {'emotion': 'Sadness', 'intensity': '4', 'reason': 'This is probably true.'}, {'emotion': 'Excitement', 'intensity': '2', 'reason': 'I am curious about why gun violence cannot be reduced in America. Is there any thing closely related or any so…
1184	Tragedy of grand scale': Victims remembered 1 year after Vegas shooting	anonymous-source/all_shooting_images_newest/100256.jpg	[{'emotion': 'Awe', 'intensity': '5', 'reason': 'it will be the big mourning process, and they should be remember, so i feel respectful of this. '}, {'emotion': 'Sadness', 'intensity': '4', 'reason': 'So many innocent people were killed.'}, {'emotion': 'Sadness', 'intensity': '3', 'reason': 'I feel sorry and sad for people who died in gun violence. And I hope there will be less gun violence in so…
1185	For Parkland students, reminders of deadly shooting are 'everywhere you go'	anonymous-source/all_shooting_images_newest/10548.jpg	[{'emotion': 'Sadness', 'intensity': '5', 'reason': 'why should students need to worried about this? they actually can enjoy their school life! Because of the gun violence, they need to live under fear, i feel so sorry about them. '}, {'emotion': 'Sadness', 'intensity': '4', 'reason': 'I imagine the shooting was all they could think about for a long time. '}, {'emotion': 'Sadness', 'intensity': '…
1203	Garden provides place to mourn Las Vegas shooting victims	anonymous-source/all_shooting_images_newest/90343.jpg	[{'emotion': 'Excitement', 'intensity': '3', 'reason': 'Excitement'}, {'emotion': 'Sadness', 'intensity': '2', 'reason': 'I felt sad that there are people died due to gun violence '}, {'emotion': 'Awe', 'intensity': '1', 'reason': 'Its about the "mourn of gun shooting" and it is not "gun shooting" event itself.'}, {'emotion': 'Sadness', 'intensity': '2', 'reason': 'sorry for the shooting victims …
1206	This Is Our Lane': Doctors Slam NRA After Chicago Hospital Shooting	anonymous-source/all_shooting_images_newest/110269.jpg	[{'emotion': 'Excitement', 'intensity': '3', 'reason': 'Excitement'}, {'emotion': 'Sadness', 'intensity': '4', 'reason': 'this headline is confusing. Also I am sad that another shooting took place, because it means some people die'}, {'emotion': 'Sadness', 'intensity': '1', 'reason': 'This sentence does not really make sense to me.'}, {'emotion': 'Anger', 'intensity': '2', 'reason': '"This is our…
1208	Assembly passes gun control package	anonymous-source/all_shooting_images_newest/10140.jpg	[{'emotion': 'Excitement', 'intensity': '3', 'reason': 'Excitement'}, {'emotion': 'Excitement', 'intensity': '4', 'reason': 'I am really happy and excited to see gun control policies had been published '}, {'emotion': 'Excitement', 'intensity': '1', 'reason': 'It helps with preventing gun violence.'}, {'emotion': 'Contentment', 'intensity': '1', 'reason': 'I agree with gun control.'}, {'emotion':…
1213	Faces Not Forgotten' honors young victims of gun violence in America	anonymous-source/all_shooting_images_newest/90387.jpg	[{'emotion': 'Excitement', 'intensity': '3', 'reason': 'Excitement'}, {'emotion': 'Sadness', 'intensity': '4', 'reason': 'I felt sad about these young victims. Also I am glad that they will never be forgotten '}, {'emotion': 'Sadness', 'intensity': '1', 'reason': 'It mentions about the young victims of gun shooting.'}, {'emotion': 'Sadness', 'intensity': '2', 'reason': 'feel sorry for the young v…
1214	Today's talker: Could 'mistreatment' of shooter justify Santa Fe killings?	anonymous-source/all_shooting_images_newest/10629.jpg	[{'emotion': 'Excitement', 'intensity': '3', 'reason': 'Excitement'}, {'emotion': 'Disgust', 'intensity': '4', 'reason': "How killing be correct? I don't understand. I am sad for all the people who are killed "}, {'emotion': 'Anger', 'intensity': '3', 'reason': 'the sentence looks sarcastic and unsatisfied.'}, {'emotion': 'Anger', 'intensity': '1', 'reason': 'mistreatment could not be an excuse f…
1215	Paul McCartney attends 'March For Our Lives': I lost my best friend to gun violence	anonymous-source/all_shooting_images_newest/10397.jpg	[{'emotion': 'Excitement', 'intensity': '3', 'reason': 'Excitement'}, {'emotion': 'Sadness', 'intensity': '5', 'reason': 'I felt extremely sad because some people lost their friend. I can imagine how sad it is. '}, {'emotion': 'Sadness', 'intensity': '3', 'reason': 'resonate with the phrase "lost my best friend."'}, {'emotion': 'Sadness', 'intensity': '3', 'reason': '"I lost my best friend to gun…
1219	These Florida lawmakers accepted money from the National Rifle Association	anonymous-source/all_shooting_images_newest/10776.jpg	[{'emotion': 'Disgust', 'intensity': '4', 'reason': 'I am not a supporter of guns'}, {'emotion': 'Anger', 'intensity': '3', 'reason': 'getting money for gun could kill someone oneday'}, {'emotion': 'Anger', 'intensity': '3', 'reason': 'Some lawmakers do not follow the bottom line'}, {'emotion': 'Anger', 'intensity': '3', 'reason': 'the movement of money to silence or persuade people is frustratin…
1221	Homemade Guns Are a Much Bigger Threat Than 3D-Printed Firearms	anonymous-source/all_shooting_images_newest/180.jpg	[{'emotion': 'Fear', 'intensity': '4', 'reason': 'people are making guns at home'}, {'emotion': 'Fear', 'intensity': '3', 'reason': 'someone can shoot me when they can easily access to guns'}, {'emotion': 'Fear', 'intensity': '3', 'reason': 'gun can made home'}, {'emotion': 'Fear', 'intensity': '3', 'reason': 'the headline is scary because it implies the vast types of guns available for people '}…
1227	White Man Accused Of Pulling Gun On Muslim Teens At Minnesota McDonald s	anonymous-source/all_shooting_images_newest/110114.jpg	[{'emotion': 'Sadness', 'intensity': '5', 'reason': 'there is no need for guns in McDonalds'}, {'emotion': 'Fear', 'intensity': '4', 'reason': 'gunshot against weaker people makes me angry and I am worried if that can happen to me one day'}, {'emotion': 'Sadness', 'intensity': '1', 'reason': 'feel pity and sad for teens'}, {'emotion': 'Anger', 'intensity': '3', 'reason': 'the event is just disgus…
1228	Who is Jemel Roberson? Black Security Guard Shot Dead By Police After Subduing and Disarming Gunman	anonymous-source/all_shooting_images_newest/110516.jpg	[{'emotion': 'Sadness', 'intensity': '4', 'reason': 'the man lost his life after disarming a gunman'}, {'emotion': 'Fear', 'intensity': '4', 'reason': 'worried because it could be a racial issue'}, {'emotion': 'Sadness', 'intensity': '1', 'reason': 'it is a manslaughter?'}, {'emotion': 'Anger', 'intensity': '3', 'reason': 'racial injustices are very frustrating '}, {'emotion': 'Sadness', 'intensi…
1231	Amazon bans the sale of a guidebook for 3D printing a gun	anonymous-source/all_shooting_images_newest/182.jpg	[{'emotion': 'Fear', 'intensity': '4', 'reason': 'why is that available?'}, {'emotion': 'Contentment', 'intensity': '2', 'reason': 'Amazon has done a right thing'}, {'emotion': 'Contentment', 'intensity': '3', 'reason': 'company do pro social action'}, {'emotion': 'Awe', 'intensity': '3', 'reason': 'it is a good change but I didnt expect it to happen. It is so simple yet effective toward trying t…
1232	November 7 1:04 PM Washington voters approve tough gun control measures	anonymous-source/all_shooting_images_newest/110276.jpg	[{'emotion': 'Awe', 'intensity': '3', 'reason': 'stricter gun control laws are needed'}, {'emotion': 'Awe', 'intensity': '2', 'reason': 'why did they approve the gun control measures'}, {'emotion': 'Contentment', 'intensity': '2', 'reason': 'gun control is supported'}, {'emotion': 'Contentment', 'intensity': '3', 'reason': 'I would be satisfied if such news would come to be because it means the p…
1233	After Santa Fe School Shooting, Texas Town Grapples With Bullying	anonymous-source/all_shooting_images_newest/10053.jpg	[{'emotion': 'Sadness', 'intensity': '4', 'reason': 'the Sante Fe shooting was devastating'}, {'emotion': 'Sadness', 'intensity': '4', 'reason': 'shooting students is not right and the shoot from children is always sad '}, {'emotion': 'Sadness', 'intensity': '2', 'reason': 'messy'}, {'emotion': 'Contentment', 'intensity': '3', 'reason': 'although the topic is sad as it is. It is good that they ar…
1246	Jamie Lee Curtis Made Sure Halloween Only Used Firearms for Self-Defense and Aligned With Her Views on Gun Control	anonymous-source/all_shooting_images_newest/100263.jpg	[{'emotion': 'Contentment', 'intensity': '2', 'reason': 'I think with guns in movies, I do not really think about how guns are used especially in action movies or scary movies. That may be another reason that we are all so numb to gun issues but in my opinion when it is in a movie it is not real so I do not care too much when guns are used in certain ways. '}, {'emotion': 'Contentment', 'intensit…
1247	Pittsburgh synagogue shooting suspect Robert Bowers pleads not guilty to federal hate crime charges	anonymous-source/all_shooting_images_newest/110396.jpg	[{'emotion': 'Anger', 'intensity': '5', 'reason': 'I cannot see how he cannot be guilty of hate crime charges when he literally went into a synagogue filled with Jewish people with the intent to kill them. In my opinion that is the definition of a hate crime. And events like this set precedents for future events of this kind, meaning that if another person where to go to a mosque or church, they …
1251	Shopify bans sales of some guns, weapons and ammunition	anonymous-source/all_shooting_images_newest/240.jpg	[{'emotion': 'Contentment', 'intensity': '4', 'reason': "This is a good start. First off I didn't even know that Shopify sold guns, but the fact that they did is a little scary. This means that almost anyone could just purchase a gun with little to no hassle. With this ban, it is a good step forward for how other sellers should respond. "}, {'emotion': 'Contentment', 'intensity': '3', 'reason': "…
1255	FedEx to end program that offers discounts for business members of NRA	anonymous-source/all_shooting_images_newest/100280.jpg	[{'emotion': 'Contentment', 'intensity': '4', 'reason': 'This is a good way to stop giving this organization support. It makes me happy that companies such as FedEx are showing that they understand what this organization is doing is not good. I am a little sad that they had this discount in the first place, but the fact that they realise the mistake and changed it makes me happy. '}, {'emotion': …
1257	New Vermont law used to keep school shooting plot suspect from getting gun	anonymous-source/all_shooting_images_newest/10398.jpg	[{'emotion': 'Excitement', 'intensity': '4', 'reason': 'Excited for Laws that are able to get less shooters gun and hope that other states adopt it. '}, {'emotion': 'Contentment', 'intensity': '4', 'reason': 'this shows that the law is working.'}, {'emotion': 'Contentment', 'intensity': '4', 'reason': "Good that a law stopped a suspect from obtaining a gun. This law saved children's lives at Verm…
1259	Gun push dims as Washington gets back to work	anonymous-source/all_shooting_images_newest/10321.jpg	[{'emotion': 'Sadness', 'intensity': '3', 'reason': 'Sad that this important issue is getting less light when it needs to be a continuous fight until we get better gun control laws and no mass shootings'}, {'emotion': 'Contentment', 'intensity': '4', 'reason': 'making guns accessible should never be the focus of politics.'}, {'emotion': 'Sadness', 'intensity': '4', 'reason': "Once the mass shooti…
1262	Seattle gun storage law 'eminently reasonable,' judge says in tossing NRA, gun group's lawsuit	anonymous-source/all_shooting_images_newest/100240.jpg	[{'emotion': 'Awe', 'intensity': '1', 'reason': 'Not really sure what is being said here in this headline'}, {'emotion': 'Contentment', 'intensity': '4', 'reason': 'it shows proper investigation and education around the law.'}, {'emotion': 'Contentment', 'intensity': '4', 'reason': "Its good that the judge is tossing out the NRA's group lawsuit because it is unreasonable. "}, {'emotion': 'Content…
1263	Marchers in Huntington Beach join call for action on gun violence and school safety	anonymous-source/all_shooting_images_newest/10396.jpg	[{'emotion': 'Awe', 'intensity': '4', 'reason': 'Glad more and more people are calling for gun control and action against shootings; hopeful that one day we will see this action'}, {'emotion': 'Excitement', 'intensity': '4', 'reason': 'it shows progress in the conversation of gun control nationwide.'}, {'emotion': 'Contentment', 'intensity': '2', 'reason': "It's good that more people are joining …
1266	Retired justice urges repeal of Second Amendment	anonymous-source/all_shooting_images_newest/10762.jpg	[{'emotion': 'Contentment', 'intensity': '4', 'reason': 'Happy and hopeful as, while retired, justices have so much influence in regard to laws so hoping this creates active justices to take a stand with them. '}, {'emotion': 'Awe', 'intensity': '3', 'reason': "it shows that one's opinions may change when they become removed from the heart of issues."}, {'emotion': 'Awe', 'intensity': '2', 'reaso…
1267	Checking Facts and Falsehoods About Gun Violence and Mental Illness After Parkland Shooting	anonymous-source/all_shooting_images_newest/10420.jpg	[{'emotion': 'Contentment', 'intensity': '3', 'reason': 'Glad that things are being fact checked as many tell lies to make the shooting seem less intense than it was to downplay it.'}, {'emotion': 'Awe', 'intensity': '3', 'reason': 'I am unsure of how many "falsehoods" exist surrounding gun violence.'}, {'emotion': 'Contentment', 'intensity': '4', 'reason': 'It is good that they are checking fact…
1269	Tennessee lawmaker says pornography is a 'root cause' of school shootings	anonymous-source/all_shooting_images_newest/10330.jpg	[{'emotion': 'Amusement', 'intensity': '3', 'reason': 'Stupid reasoning from lawmaker that makes no sense; the root cause of gun violence are guns'}, {'emotion': 'Anger', 'intensity': '4', 'reason': 'this could not be further from the truth.'}, {'emotion': 'Disgust', 'intensity': '5', 'reason': 'Disgust because this is just not true this is misinformation. The lawmakers are trying to use a tragic…
1277	Entrepreneur behind fight for sharing 3D printed gun blueprints on why he's advocating for 'the people's right to keep and bear arms'	anonymous-source/all_shooting_images_newest/144.jpg	[{'emotion': 'Anger', 'intensity': '4', 'reason': 'I am against the need for 3D printed guys and allowing guns to be extremely accessible'}, {'emotion': 'Amusement', 'intensity': '1', 'reason': "It doesn't feel very newsworthy. It feels like an opinion piece and I don't feel any reason to care for his opinion."}, {'emotion': 'Disgust', 'intensity': '1', 'reason': 'I think that the fight over whet…
1283	A Community Response to Mass Shooting Forum and Discussion	anonymous-source/all_shooting_images_newest/10663.jpg	[{'emotion': 'Excitement', 'intensity': '3', 'reason': 'There is a community opinion response on the mass shooting'}, {'emotion': 'Contentment', 'intensity': '1', 'reason': 'The headline seams to imply that people are taking the matter seriously and discussing what to do about it.'}, {'emotion': 'Contentment', 'intensity': '1', 'reason': 'The headline does not do a good job of summarizing the poi…
1285	Capital Gazette gunman constantly harassed journalists on Twitter. Why wasn't he stopped?	anonymous-source/all_shooting_images_newest/10242.jpg	[{'emotion': 'Anger', 'intensity': '3', 'reason': 'Text make indicates that police were not doing their jobs properly'}, {'emotion': 'Anger', 'intensity': '1', 'reason': 'It is unclear from the headline the extent/extremity of the harassment, and even if was rather extreme, the actual process of stopping him is probably easier said than done.'}, {'emotion': 'Fear', 'intensity': '3', 'reason': "If…
