# Supplementary material
Source: ML conference proceedings conference paper supplement (https://aclanthology.org/2022.aacl-main.29)
Supplement: Dataset [file 2022.aacl-main.29.Dataset.zip › NEmoP/NEmoP-Consensus/NEmoP-CE/NEmoP-CE-TI.csv]

	Headline	url	textimage_responses
1	Emma Gonzalez Brought to Tears Honoring Victims of Gun Violence	anonymous-source/all_shooting_images_newest/100502.jpg	[{'emotion': 'Awe', 'intensity': '1', 'reason': "I don't care", 'url': 'anonymous-source/all_shooting_images_newest/100502.jpg'}, {'emotion': 'Contentment', 'intensity': '2', 'reason': 'I like seeing happy facial expressions', 'url': 'anonymous-source/all_shooting_images_newest/100502.jpg'}, {'emotion': 'Sadness', 'intensity': '3', 'reason': 'victims should be remembered', 'url': 'anonymous-sourc…
4	No safe haven as shootings rock US schools	anonymous-source/all_shooting_images_newest/10827.jpg	[{'emotion': 'Sadness', 'intensity': '3', 'reason': 'students are innocent', 'url': 'anonymous-source/all_shooting_images_newest/10827.jpg'}, {'emotion': 'Fear', 'intensity': '4', 'reason': "I don't like the idea that something bad is happening at school", 'url': 'anonymous-source/all_shooting_images_newest/10827.jpg'}, {'emotion': 'Fear', 'intensity': '3', 'reason': 'this shooting phenomenon is …
7	Pittsburgh synagogue shooting: Portraits of the 11 victims	anonymous-source/all_shooting_images_newest/100385.jpg	[{'emotion': 'Sadness', 'intensity': '3', 'reason': 'people died because of hate crimes', 'url': 'anonymous-source/all_shooting_images_newest/100385.jpg'}, {'emotion': 'Sadness', 'intensity': '4', 'reason': 'I get sad seeing other people struggling or upset', 'url': 'anonymous-source/all_shooting_images_newest/100385.jpg'}, {'emotion': 'Sadness', 'intensity': '3', 'reason': 'this tragedy is sad',…
20	North Carolina high school shooting stemmed from bullying that escalated out of control, officials say	anonymous-source/all_shooting_images_newest/100479.jpg	[{'emotion': 'Fear', 'intensity': '3', 'reason': 'Pictures are creepy and would be terrified of this happening to me.', 'url': 'anonymous-source/all_shooting_images_newest/100479.jpg'}, {'emotion': 'Anger', 'intensity': '3', 'reason': 'Teenagers who illegally use guns should be severely punished.', 'url': 'anonymous-source/all_shooting_images_newest/100479.jpg'}, {'emotion': 'Sadness', 'intensity…
23	Bloomberg criticizes Trump after Pittsburgh shooting	anonymous-source/all_shooting_images_newest/100079.jpg	[{'emotion': 'Amusement', 'intensity': '3', 'reason': 'The headlines look like normal real-time commentary news, but the pictures look funny.', 'url': 'anonymous-source/all_shooting_images_newest/100079.jpg'}, {'emotion': 'Contentment', 'intensity': '3', 'reason': "it's the president's responsibility to think for the country's peace, but the numerous shooting cases show that people do not feel pe…
27	Chicago police chief calls 58 shootings in 3 days 'tragic, senseless and cowardly'	anonymous-source/all_shooting_images_newest/259.jpg	[{'emotion': 'Anger', 'intensity': '3', 'reason': 'The picture shows what happened, the real situation is sad and scary.', 'url': 'anonymous-source/all_shooting_images_newest/259.jpg'}, {'emotion': 'Anger', 'intensity': '3', 'reason': 'I think it is irresponsible to judge the bad results after it happened.', 'url': 'anonymous-source/all_shooting_images_newest/259.jpg'}, {'emotion': 'Anger', 'inte…
28	Bank of America to stop lending to military-style weapons makers	anonymous-source/all_shooting_images_newest/10391.jpg	[{'emotion': 'Contentment', 'intensity': '3', 'reason': 'It is joyful and hopeful to see these positive actions.', 'url': 'anonymous-source/all_shooting_images_newest/10391.jpg'}, {'emotion': 'Contentment', 'intensity': '3', 'reason': 'I think it is a good trend.', 'url': 'anonymous-source/all_shooting_images_newest/10391.jpg'}, {'emotion': 'Anger', 'intensity': '3', 'reason': "I don't think bank…
34	Gun-related homicides, suicides kill more people than war, study says	anonymous-source/all_shooting_images_newest/126.jpg	[{'emotion': 'Fear', 'intensity': '3', 'reason': 'Terrified of this fact and terrified of the gun in the picture.', 'url': 'anonymous-source/all_shooting_images_newest/126.jpg'}, {'emotion': 'Sadness', 'intensity': '3', 'reason': 'It is sad to realize the bad, huge impact of guns on guns owners.', 'url': 'anonymous-source/all_shooting_images_newest/126.jpg'}, {'emotion': 'Sadness', 'intensity': '…
35	Spokane, Wash. ends gun sales by police after probe	anonymous-source/all_shooting_images_newest/110042.jpg	[{'emotion': 'Excitement', 'intensity': '3', 'reason': 'These guns look scary, but the title reassures me.', 'url': 'anonymous-source/all_shooting_images_newest/110042.jpg'}, {'emotion': 'Contentment', 'intensity': '3', 'reason': "it's a good trend.", 'url': 'anonymous-source/all_shooting_images_newest/110042.jpg'}, {'emotion': 'Contentment', 'intensity': '3', 'reason': 'This picture does not inv…
36	Gun Control Groups Eclipse N.R.A. in Election Spending	anonymous-source/all_shooting_images_newest/110462.jpg	[{'emotion': 'Contentment', 'intensity': '3', 'reason': "The people in the pictures seem to have so many different emotions that I can't get to the point.", 'url': 'anonymous-source/all_shooting_images_newest/110462.jpg'}, {'emotion': 'Contentment', 'intensity': '3', 'reason': 'this is a good trend.', 'url': 'anonymous-source/all_shooting_images_newest/110462.jpg'}, {'emotion': 'Contentment', 'in…
37	Shooting at esports event in Florida raises calls for more security	anonymous-source/all_shooting_images_newest/313.jpg	[{'emotion': 'Fear', 'intensity': '3', 'reason': 'The cordon and police cars make people nervous and scared.', 'url': 'anonymous-source/all_shooting_images_newest/313.jpg'}, {'emotion': 'Contentment', 'intensity': '3', 'reason': 'this is a good trend.', 'url': 'anonymous-source/all_shooting_images_newest/313.jpg'}, {'emotion': 'Sadness', 'intensity': '3', 'reason': 'It is sad that people have to …
41	A Black Security Guard Was Killed By Police As He Tried To Stop A Shooting	anonymous-source/all_shooting_images_newest/110335.jpg	[{'emotion': 'Anger', 'intensity': '5', 'reason': "It's frustrating see another black man getting shot by the police when he did nothing wrong. ", 'url': 'anonymous-source/all_shooting_images_newest/110335.jpg'}, {'emotion': 'Sadness', 'intensity': '3', 'reason': "It's sad to see heroes die. If the caption is true then this man died saving someone's life. It's just a tragedy, and I think sometime…
42	Interior Secretary Ryan Zinke Held Onto Undisclosed Shares In Gun Company	anonymous-source/all_shooting_images_newest/10741.jpg	[{'emotion': 'Anger', 'intensity': '4', 'reason': 'Its frustrating to see people in power secretly supporting gun companies when there is a crisis that is happening in the country.', 'url': 'anonymous-source/all_shooting_images_newest/10741.jpg'}, {'emotion': 'Disgust', 'intensity': '1', 'reason': "It's a man who is clearly very privileged delivering a speech. I know he's already plotting somethi…
46	Firearms, violence and hate crimes are public health issues we must address immediately | TheHill	anonymous-source/all_shooting_images_newest/110481.jpg	[{'emotion': 'Contentment', 'intensity': '4', 'reason': 'I agree with this statement and it makes me happy to see a major newspaper bring this issue to light\r\n', 'url': 'anonymous-source/all_shooting_images_newest/110481.jpg'}, {'emotion': 'Contentment', 'intensity': '2', 'reason': "It's good that people are protesting and that these activists are trying to achieve positive change.", 'url': 'an…
48	Bank of America to Stop Financing Makers of Military-Style Guns	anonymous-source/all_shooting_images_newest/10755.jpg	[{'emotion': 'Contentment', 'intensity': '4', 'reason': "it's nice to see such a big corporation taking responsibility in not supporting big military companies that sell guns.", 'url': 'anonymous-source/all_shooting_images_newest/10755.jpg'}, {'emotion': 'Sadness', 'intensity': '4', 'reason': 'Why would Bank of America do such things like that. Guns are dangerous and they need too top putting mon…
49	This Is Us' mourns Pittsburgh synagogue shooting victims in powerful message	anonymous-source/all_shooting_images_newest/100168.jpg	[{'emotion': 'Sadness', 'intensity': '4', 'reason': 'It sad to see a happy family in headlines of a shooting.', 'url': 'anonymous-source/all_shooting_images_newest/100168.jpg'}, {'emotion': 'Sadness', 'intensity': '5', 'reason': "What a beautiful family, and it's just sad to see them be gone. It's tragic and just absolutely disappointing for me to hear and see. They could have had such a bright a…
50	Orlando nightclub gunman remembered as abusive, homophobic and racist	anonymous-source/all_shooting_images_newest/110070.jpg	[{'emotion': 'Anger', 'intensity': '4', 'reason': 'Its terrible to see the shooter and think of how many people he killed.', 'url': 'anonymous-source/all_shooting_images_newest/110070.jpg'}, {'emotion': 'Sadness', 'intensity': '2', 'reason': "How could someone fall so low and be so pushed to such a lowly point. I'm not even angry, just sad, and I want him to be understood, to speak to him, to wha…
51	After He Subdued a Shooting Suspect, an Armed, Black Security Guard Is Killed by Responding Police	anonymous-source/all_shooting_images_newest/110361.jpg	[{'emotion': 'Anger', 'intensity': '5', 'reason': 'Police brutality is such a pressing issue in the country and there are so many cases of innocent lives being lost yet nothing is being done about it.', 'url': 'anonymous-source/all_shooting_images_newest/110361.jpg'}, {'emotion': 'Sadness', 'intensity': '2', 'reason': "It's so depressing to see miscommunciation creating unnecessary violence. Just…
55	California Is Already Tough on Guns. After a Mass Shooting, Some Wonder if It s Enough	anonymous-source/all_shooting_images_newest/110229.jpg	[{'emotion': 'Contentment', 'intensity': '4', 'reason': 'I agree that gun laws should be even stricter than they already are.', 'url': 'anonymous-source/all_shooting_images_newest/110229.jpg'}, {'emotion': 'Contentment', 'intensity': '2', 'reason': "It's good that these issues are being brought up, and that the safety and well being of people are being valued. It's so easy to ignore guns and say …
56	Police change explanation again after killing black man they mistook for an active shooter	anonymous-source/all_shooting_images_newest/110502.jpg	[{'emotion': 'Anger', 'intensity': '5', 'reason': 'Police brutality in the country is such a large issue and it seems like the same instances are occurring over and over again with no change being made.', 'url': 'anonymous-source/all_shooting_images_newest/110502.jpg'}, {'emotion': 'Anger', 'intensity': '5', 'reason': "Why, how, and who could do this. It's a police officer's job to protect the pe…
57	3 drivers say man charged in 'stand your ground' shooting death threatened them	anonymous-source/all_shooting_images_newest/391.jpg	[{'emotion': 'Sadness', 'intensity': '4', 'reason': "It's so sad to see so many shooting happening around the country and innocent lives being lost because gun laws are not tighter.", 'url': 'anonymous-source/all_shooting_images_newest/391.jpg'}, {'emotion': 'Fear', 'intensity': '4', 'reason': "this could happen to any one at any time. Isn't that just crazy and scary. Am I ever safe? What do I do…
61	He Created 3D-Printed Guns And Funded Neo-Nazis. Now He's An International Fugitive.	anonymous-source/all_shooting_images_newest/90054.jpg	[{'emotion': 'Sadness', 'intensity': '3', 'reason': 'why these people who have received high level of education do not devote themselves that are good for the citizens and the country?', 'url': 'anonymous-source/all_shooting_images_newest/90054.jpg'}, {'emotion': 'Disgust', 'intensity': '3', 'reason': 'I think it is angry and disgusting that capable people do not use their abilities to build a be…
63	Trump's school safety commission would prefer if you didn't talk about gun control	anonymous-source/all_shooting_images_newest/278.jpg	[{'emotion': 'Anger', 'intensity': '3', 'reason': 'we need to mention gun control in everywhere especially in the schools, since there are a lot of young students there.', 'url': 'anonymous-source/all_shooting_images_newest/278.jpg'}, {'emotion': 'Amusement', 'intensity': '3', 'reason': "I think it's ridiculous not to reflect on the bad things that have happened.", 'url': 'anonymous-source/all_sh…
71	More than 20,000 Americans a year kill themselves with a gun. Alarmed gun sellers are joining the suicide prevention fight.	anonymous-source/all_shooting_images_newest/90109.jpg	[{'emotion': 'Sadness', 'intensity': '3', 'reason': 'I never thought that people will use a gun to suicide. But this do call for attention, that guns are too dangerous for people to hold by themselves.', 'url': 'anonymous-source/all_shooting_images_newest/90109.jpg'}, {'emotion': 'Sadness', 'intensity': '3', 'reason': 'The legal age for holding guns should be raised, and government should do the …
73	U.S. judge halts release of blueprints for 3-D printed guns	anonymous-source/all_shooting_images_newest/296.jpg	[{'emotion': 'Contentment', 'intensity': '3', 'reason': 'before the government come up with a better solution about gun control, they should pay no attention to 3D -print of guns anymore.', 'url': 'anonymous-source/all_shooting_images_newest/296.jpg'}, {'emotion': 'Contentment', 'intensity': '3', 'reason': 'I think this is a good trend.', 'url': 'anonymous-source/all_shooting_images_newest/296.jp…
77	Pittsburgh sports teams pay tribute to synagogue shooting victims	anonymous-source/all_shooting_images_newest/100304.jpg	[{'emotion': 'Awe', 'intensity': '3', 'reason': 'such warm actions are necessary to honor the victims.', 'url': 'anonymous-source/all_shooting_images_newest/100304.jpg'}, {'emotion': 'Sadness', 'intensity': '3', 'reason': 'The gun incident has triggered sadness among people and among religions.', 'url': 'anonymous-source/all_shooting_images_newest/100304.jpg'}, {'emotion': 'Awe', 'intensity': '3'…
78	School shootings will scar a generation of students	anonymous-source/all_shooting_images_newest/10732.jpg	[{'emotion': 'Sadness', 'intensity': '3', 'reason': 'it is true that students who experience or just witness a gun shoot will be badly influenced for his or her whole life. (PTSD)', 'url': 'anonymous-source/all_shooting_images_newest/10732.jpg'}, {'emotion': 'Sadness', 'intensity': '3', 'reason': 'I think this statement has become a reality.', 'url': 'anonymous-source/all_shooting_images_newest/1…
80	Retired firefighter found guilty for shooting at lost black teen on doorstep	anonymous-source/all_shooting_images_newest/100223.jpg	[{'emotion': 'Fear', 'intensity': '5', 'reason': 'never expect that a firefighter would do such things', 'url': 'anonymous-source/all_shooting_images_newest/100223.jpg'}, {'emotion': 'Anger', 'intensity': '4', 'reason': 'the bias against black people is absolutely revolting. ', 'url': 'anonymous-source/all_shooting_images_newest/100223.jpg'}, {'emotion': 'Disgust', 'intensity': '3', 'reason': 'I …
81	Kroger shooting in Kentucky is being investigated as a hate crime	anonymous-source/all_shooting_images_newest/100460.jpg	[{'emotion': 'Sadness', 'intensity': '3', 'reason': 'hate is not the reason someone can take others lives away', 'url': 'anonymous-source/all_shooting_images_newest/100460.jpg'}, {'emotion': 'Sadness', 'intensity': '4', 'reason': "hate crimes against people of color are so prevalent. It's extremely sad and fearful as I am a minority. ", 'url': 'anonymous-source/all_shooting_images_newest/100460.j…
84	Massacre fatigue: Do we ignore shootings?	anonymous-source/all_shooting_images_newest/110491.jpg	[{'emotion': 'Contentment', 'intensity': '5', 'reason': 'we should have notice that long time ago. There are too many cases about gun violence. And we should have taken good attention about that', 'url': 'anonymous-source/all_shooting_images_newest/110491.jpg'}, {'emotion': 'Sadness', 'intensity': '3', 'reason': 'we should not ignore shootings, but we are. ', 'url': 'anonymous-source/all_shooting…
87	Video of Columbine Massacre Shown in School for Active Shooter Training	anonymous-source/all_shooting_images_newest/10508.jpg	[{'emotion': 'Fear', 'intensity': '5', 'reason': 'I am afraid something similar happened to me ', 'url': 'anonymous-source/all_shooting_images_newest/10508.jpg'}, {'emotion': 'Fear', 'intensity': '5', 'reason': 'the photo makes this situation even more real and I would be completely terrified. ', 'url': 'anonymous-source/all_shooting_images_newest/10508.jpg'}, {'emotion': 'Fear', 'intensity': '3'…
91	California bar massacre leaves another American community reeling after 12 gunned down by Marine veteran	anonymous-source/all_shooting_images_newest/110043.jpg	[{'emotion': 'Sadness', 'intensity': '3', 'reason': 'It is a sad news that somebody were killed by guns.', 'url': 'anonymous-source/all_shooting_images_newest/110043.jpg'}, {'emotion': 'Sadness', 'intensity': '5', 'reason': '12 lives were lost.', 'url': 'anonymous-source/all_shooting_images_newest/110043.jpg'}, {'emotion': 'Sadness', 'intensity': '4', 'reason': 'this is not okay', 'url': 'anonymo…
95	California Today: Limiting Ammunition to Thwart Gun Violence	anonymous-source/all_shooting_images_newest/90059.jpg	[{'emotion': 'Contentment', 'intensity': '4', 'reason': 'the world will be better with less weapons', 'url': 'anonymous-source/all_shooting_images_newest/90059.jpg'}, {'emotion': 'Contentment', 'intensity': '4', 'reason': 'once again, this is the bare minimum. ', 'url': 'anonymous-source/all_shooting_images_newest/90059.jpg'}, {'emotion': 'Sadness', 'intensity': '3', 'reason': "Don't know enough …
99	Opinion | Schools Can Keep Kids Safe Without Giving Their Teachers Guns	anonymous-source/all_shooting_images_newest/90388.jpg	[{'emotion': 'Contentment', 'intensity': '3', 'reason': 'It is hard to tell whether it is good for teachers to have guns, but at least shools must have ways to protect students and teachers from gun violance', 'url': 'anonymous-source/all_shooting_images_newest/90388.jpg'}, {'emotion': 'Contentment', 'intensity': '3', 'reason': 'I agree with the statement. ', 'url': 'anonymous-source/all_shooting…
106	Las Vegas Shooting: Retired Carpenter Builds New Memorial of 58 Crosses Ahead of Anniversary	anonymous-source/all_shooting_images_newest/90220.jpg	[{'emotion': 'Sadness', 'intensity': '3', 'reason': 'Pure tragedy to see this.', 'url': 'anonymous-source/all_shooting_images_newest/90220.jpg'}, {'emotion': 'Awe', 'intensity': '3', 'reason': 'amazing that he did that', 'url': 'anonymous-source/all_shooting_images_newest/90220.jpg'}, {'emotion': 'Sadness', 'intensity': '3', 'reason': 'I feel really sad to see that many crosses. ', 'url': 'anonym…
107	After California shooting, Democrats vow to tackle gun violence | Fox News	anonymous-source/all_shooting_images_newest/110511.jpg	[{'emotion': 'Anger', 'intensity': '3', 'reason': 'Legislators always have to wait for real harm to happen before trying to solve the problem', 'url': 'anonymous-source/all_shooting_images_newest/110511.jpg'}, {'emotion': 'Sadness', 'intensity': '3', 'reason': 'lives were lost', 'url': 'anonymous-source/all_shooting_images_newest/110511.jpg'}, {'emotion': 'Contentment', 'intensity': '3', 'reason'…
110	3D-Printed Guns Are Unchecked and Untraceable. And a Judge Blocked Them at the Last Minute	anonymous-source/all_shooting_images_newest/417.jpg	[{'emotion': 'Contentment', 'intensity': '3', 'reason': 'Really glad to see these 3D printed guns are blocked.', 'url': 'anonymous-source/all_shooting_images_newest/417.jpg'}, {'emotion': 'Contentment', 'intensity': '3', 'reason': 'guns are scary and untraceable ones are worse', 'url': 'anonymous-source/all_shooting_images_newest/417.jpg'}, {'emotion': 'Contentment', 'intensity': '3', 'reason': '…
112	'We are a better city': Emotional mayor decries Chicago gun violence	anonymous-source/all_shooting_images_newest/19.jpg	[{'emotion': 'Sadness', 'intensity': '3', 'reason': "It's sad to see how people react to these tragedies but can't change the situation.", 'url': 'anonymous-source/all_shooting_images_newest/19.jpg'}, {'emotion': 'Sadness', 'intensity': '3', 'reason': 'lives werre lost', 'url': 'anonymous-source/all_shooting_images_newest/19.jpg'}, {'emotion': 'Sadness', 'intensity': '3', 'reason': 'What he said …
114	Top Senate Dem admits: No gun control law would have stopped Santa Fe massacre	anonymous-source/all_shooting_images_newest/10385.jpg	[{'emotion': 'Sadness', 'intensity': '3', 'reason': 'Sad that the politician said something like this which adds the anxiety of the public.', 'url': 'anonymous-source/all_shooting_images_newest/10385.jpg'}, {'emotion': 'Sadness', 'intensity': '3', 'reason': 'not true', 'url': 'anonymous-source/all_shooting_images_newest/10385.jpg'}, {'emotion': 'Anger', 'intensity': '3', 'reason': 'If there is a …
116	The Latest: Victim's family marks anniversary of shooting	anonymous-source/all_shooting_images_newest/90248.jpg	[{'emotion': 'Sadness', 'intensity': '4', 'reason': 'To feel sorry for those who died innocently, only family members will remember them forever and the pain will not go away.', 'url': 'anonymous-source/all_shooting_images_newest/90248.jpg'}, {'emotion': 'Sadness', 'intensity': '3', 'reason': 'that children were the victium of gun shooting', 'url': 'anonymous-source/all_shooting_images_newest/902…
117	Florida Yoga Studio Shooting Suspect Was A Far-Right Misogynist	anonymous-source/all_shooting_images_newest/110513.jpg	[{'emotion': 'Disgust', 'intensity': '5', 'reason': 'Disgusted by what these misogynistic men do, they don’t have any sympathy for humans, it’s very pathetic.', 'url': 'anonymous-source/all_shooting_images_newest/110513.jpg'}, {'emotion': 'Disgust', 'intensity': '3', 'reason': 'someone took lives', 'url': 'anonymous-source/all_shooting_images_newest/110513.jpg'}, {'emotion': 'Fear', 'intensity': …
118	MSNBC's Ruhle to Rubio: 'Step up and be a human' on gun control	anonymous-source/all_shooting_images_newest/10373.jpg	[{'emotion': 'Contentment', 'intensity': '5', 'reason': "It's brave for her to say something like this in a live broadcast.", 'url': 'anonymous-source/all_shooting_images_newest/10373.jpg'}, {'emotion': 'Contentment', 'intensity': '3', 'reason': 'she is right', 'url': 'anonymous-source/all_shooting_images_newest/10373.jpg'}, {'emotion': 'Awe', 'intensity': '3', 'reason': 'She is very brave to say…
120	Suspect In Fatal Kroger Shooting First Tried To Get Inside Black Church: Police	anonymous-source/all_shooting_images_newest/100083.jpg	[{'emotion': 'Anger', 'intensity': '2', 'reason': 'He might be motivated by racism', 'url': 'anonymous-source/all_shooting_images_newest/100083.jpg'}, {'emotion': 'Disgust', 'intensity': '3', 'reason': 'sad', 'url': 'anonymous-source/all_shooting_images_newest/100083.jpg'}, {'emotion': 'Fear', 'intensity': '5', 'reason': 'It’s scary to think that someone can just walk into a place and decide to e…
124	President Trump praises Dixon officer who stopped school shooting suspect	anonymous-source/all_shooting_images_newest/100387.jpg	[{'emotion': 'Excitement', 'intensity': '3', 'reason': 'It shows that lawmakers care about stopping school shootings', 'url': 'anonymous-source/all_shooting_images_newest/100387.jpg'}, {'emotion': 'Fear', 'intensity': '3', 'reason': 'fear', 'url': 'anonymous-source/all_shooting_images_newest/100387.jpg'}, {'emotion': 'Contentment', 'intensity': '3', 'reason': 'It’s important for prevent shootings…
133	New restrictions on gun ownership signed into law by California Gov. Jerry Brown, a Democrat	anonymous-source/all_shooting_images_newest/90326.jpg	[{'emotion': 'Contentment', 'intensity': '3', 'reason': 'Hopefully, other states will follow his lead', 'url': 'anonymous-source/all_shooting_images_newest/90326.jpg'}, {'emotion': 'Contentment', 'intensity': '2', 'reason': 'happy', 'url': 'anonymous-source/all_shooting_images_newest/90326.jpg'}, {'emotion': 'Contentment', 'intensity': '3', 'reason': 'I’m not sure what the new restrictions in reg…
134	Police boost patrols at synagogues after Pittsburgh shooting	anonymous-source/all_shooting_images_newest/100409.jpg	[{'emotion': 'Contentment', 'intensity': '4', 'reason': 'There are less chances of a shooting happening again', 'url': 'anonymous-source/all_shooting_images_newest/100409.jpg'}, {'emotion': 'Fear', 'intensity': '2', 'reason': 'happy', 'url': 'anonymous-source/all_shooting_images_newest/100409.jpg'}, {'emotion': 'Fear', 'intensity': '4', 'reason': 'It’s scary to hear that a place that one goes to …
139	Trump Hotel Event Shooting Threat Probed by Feds: Bloodstained MAGA Hats as Trophies	anonymous-source/all_shooting_images_newest/90051.jpg	[{'emotion': 'Fear', 'intensity': '3', 'reason': "It's terrifying to see such violent posts on social media", 'url': 'anonymous-source/all_shooting_images_newest/90051.jpg'}, {'emotion': 'Amusement', 'intensity': '3', 'reason': 'happy', 'url': 'anonymous-source/all_shooting_images_newest/90051.jpg'}, {'emotion': 'Fear', 'intensity': '3', 'reason': 'It’s scary to think that someone is going to kil…
140	Police: San Jose teacher suspected in road rage incident arrested in classroom with loaded gun	anonymous-source/all_shooting_images_newest/69.jpg	[{'emotion': 'Anger', 'intensity': '4', 'reason': "It is so danger to have a load gun in the classroom where there are a lot of students there. As a teacher, he's responsibility is not only to teach the students knowledge, but also including keep the students safe.", 'url': 'anonymous-source/all_shooting_images_newest/69.jpg'}, {'emotion': 'Fear', 'intensity': '2', 'reason': 'why is he smiling, h…
141	New York Today: Survivors of Gun Violence	anonymous-source/all_shooting_images_newest/10428.jpg	[{'emotion': 'Sadness', 'intensity': '2', 'reason': 'It is so lucky for this man to survive after shooting by a gun. This is one good thing. But it also makes me feel sad cause there are so many people who died because of gun. ', 'url': 'anonymous-source/all_shooting_images_newest/10428.jpg'}, {'emotion': 'Sadness', 'intensity': '2', 'reason': 'Sad to see the repercussions of gun violence\r\n', '…
143	California governor signs bill to raise age requirement to 21 for purchase of rifles, shotguns	anonymous-source/all_shooting_images_newest/90007.jpg	[{'emotion': 'Contentment', 'intensity': '4', 'reason': 'This really makes sense here. Since people at a young age can not control themselves well. Such regulations can help to avoid quite amount of tragedies in school.', 'url': 'anonymous-source/all_shooting_images_newest/90007.jpg'}, {'emotion': 'Contentment', 'intensity': '1', 'reason': "Good measure but I honestly can't see how that would mak…
157	Eiffel Tower goes dark to honor Pittsburgh shooting victims	anonymous-source/all_shooting_images_newest/100494.jpg	[{'emotion': 'Awe', 'intensity': '4', 'reason': 'the died people are innocent. and the action of turn off the lights on Eiffel Tower to honor the died is really good and necessary thing to do.', 'url': 'anonymous-source/all_shooting_images_newest/100494.jpg'}, {'emotion': 'Sadness', 'intensity': '2', 'reason': 'Our European friends have it right in banning gun ownership. The reason for this symbo…
170	Pittsburgh synagogue shooting suspect indicted on federal hate crime charges, faces 535 years	anonymous-source/all_shooting_images_newest/110518.jpg	[{'emotion': 'Contentment', 'intensity': '3', 'reason': "this guy got what he sowed. As an old saying once goes, you reap what you sow. I also find it slightly sad how even though he has caused so much sorrow during the mass shooting, he only needs to do 535 years, and it is likely that he will die before completing the whole sentence, therefore he couldn't truly live up to his sentence and pay f…
176	After Pittsburgh synagogue shooting, Squirrel Hill residents shaken but not surprised	anonymous-source/all_shooting_images_newest/100344.jpg	[{'emotion': 'Disgust', 'intensity': '4', 'reason': "saying a mass murder is not surprising is just way too insensitive. If it's not surprising then why didn't these people do anything in the first place to prevent it? If they have prevented it then many who have lost their lives could've very well been alive today, and to be this passive towards something that happens in your neighborhood, I'm t…
182	Democratic wins could mean state action on health care, guns	anonymous-source/all_shooting_images_newest/110379.jpg	[{'emotion': 'Contentment', 'intensity': '3', 'reason': 'Its a good decision ', 'url': 'anonymous-source/all_shooting_images_newest/110379.jpg'}, {'emotion': 'Excitement', 'intensity': '3', 'reason': 'government should take more actions ', 'url': 'anonymous-source/all_shooting_images_newest/110379.jpg'}, {'emotion': 'Contentment', 'intensity': '3', 'reason': "It's a good thing if states can take …
188	Mass shootings 'increasing'and pose'most serious threat' in US, expert says	anonymous-source/all_shooting_images_newest/110490.jpg	[{'emotion': 'Fear', 'intensity': '3', 'reason': 'I agree and it can happen anywhere', 'url': 'anonymous-source/all_shooting_images_newest/110490.jpg'}, {'emotion': 'Fear', 'intensity': '3', 'reason': "people are really worried about their danger and society shouldn't be like this ", 'url': 'anonymous-source/all_shooting_images_newest/110490.jpg'}, {'emotion': 'Fear', 'intensity': '3', 'reason': …
193	As immigrants flow across US border, American guns go south	anonymous-source/all_shooting_images_newest/90158.jpg	[{'emotion': 'Fear', 'intensity': '3', 'reason': 'thats going to make it worse', 'url': 'anonymous-source/all_shooting_images_newest/90158.jpg'}, {'emotion': 'Fear', 'intensity': '3', 'reason': 'think of how many immigrants would actually die and their family and children in the US ', 'url': 'anonymous-source/all_shooting_images_newest/90158.jpg'}, {'emotion': 'Disgust', 'intensity': '3', 'reason…
194	Thousands head to DC for gun control protest Video	anonymous-source/all_shooting_images_newest/10302.jpg	[{'emotion': 'Contentment', 'intensity': '3', 'reason': 'its good to see them taking a stand and spreading awareness ', 'url': 'anonymous-source/all_shooting_images_newest/10302.jpg'}, {'emotion': 'Excitement', 'intensity': '3', 'reason': 'to see students are doing the right thing for community ', 'url': 'anonymous-source/all_shooting_images_newest/10302.jpg'}, {'emotion': 'Contentment', 'intensi…
196	1 student injured in Florida high school shooting amid national walkouts over gun violence	anonymous-source/all_shooting_images_newest/10547.jpg	[{'emotion': 'Sadness', 'intensity': '3', 'reason': 'I feel bad for everyone that has been affected', 'url': 'anonymous-source/all_shooting_images_newest/10547.jpg'}, {'emotion': 'Fear', 'intensity': '3', 'reason': "student's life can actually be in danger ", 'url': 'anonymous-source/all_shooting_images_newest/10547.jpg'}, {'emotion': 'Fear', 'intensity': '3', 'reason': 'This news makes me feel t…
206	Las Vegas shooting: Memorial events mark 1-year anniversary as massacre motive still shrouded in mystery	anonymous-source/all_shooting_images_newest/100424.jpg	[{'emotion': 'Contentment', 'intensity': '2', 'reason': "it's good to see people coming together at peace and love", 'url': 'anonymous-source/all_shooting_images_newest/100424.jpg'}, {'emotion': 'Sadness', 'intensity': '5', 'reason': 'innocent people died and they family have no comfort', 'url': 'anonymous-source/all_shooting_images_newest/100424.jpg'}, {'emotion': 'Sadness', 'intensity': '4', 'r…
208	Donald Trump Is a 'Coward' for Leaving D.C. During Gun Protest Says Gregg Popovich	anonymous-source/all_shooting_images_newest/10853.jpg	[{'emotion': 'Amusement', 'intensity': '4', 'reason': "It's fun to see politicians fight", 'url': 'anonymous-source/all_shooting_images_newest/10853.jpg'}, {'emotion': 'Amusement', 'intensity': '5', 'reason': 'i find it funny and not surprising that trump would do that but even more that he got called a coward', 'url': 'anonymous-source/all_shooting_images_newest/10853.jpg'}, {'emotion': 'Anger',…
209	Nikolas Cruz's brother regrets bullying school shooter, report says	anonymous-source/all_shooting_images_newest/10715.jpg	[{'emotion': 'Fear', 'intensity': '2', 'reason': "Just makes sense and make you think of how bad reality is. what comes and goes, it' just how the world rolls.", 'url': 'anonymous-source/all_shooting_images_newest/10715.jpg'}, {'emotion': 'Disgust', 'intensity': '5', 'reason': 'bullying is wrong, but being bullied is not an excuse to ill people', 'url': 'anonymous-source/all_shooting_images_newes…
211	Doctors rip Santorum for saying students should learn CPR instead of protesting gun violence	anonymous-source/all_shooting_images_newest/10406.jpg	[{'emotion': 'Amusement', 'intensity': '2', 'reason': 'every has their own argument and his argument is just funny.', 'url': 'anonymous-source/all_shooting_images_newest/10406.jpg'}, {'emotion': 'Anger', 'intensity': '5', 'reason': 'yes CPR is important, but there is a reason why students are protesting, they are kids who should be enjoying their childhood not be worried about dying in school.', …
212	Ivanka Trump tweets about Jacksonville mass shooting, and people are calling her out	anonymous-source/all_shooting_images_newest/453.jpg	[{'emotion': 'Amusement', 'intensity': '4', 'reason': "It's just amusing to see celebrities / famous people be put in drama.", 'url': 'anonymous-source/all_shooting_images_newest/453.jpg'}, {'emotion': 'Anger', 'intensity': '5', 'reason': 'she has the means to do something about it, by herself or with her Dad', 'url': 'anonymous-source/all_shooting_images_newest/453.jpg'}, {'emotion': 'Anger', 'i…
216	More gun laws won't curb gun crime	anonymous-source/all_shooting_images_newest/100429.jpg	[{'emotion': 'Sadness', 'intensity': '4', 'reason': "It's true, and this is a problem that will continue to be addressed, but not necessarily solved. ", 'url': 'anonymous-source/all_shooting_images_newest/100429.jpg'}, {'emotion': 'Anger', 'intensity': '5', 'reason': 'US needs more gun laws so people can stop dying', 'url': 'anonymous-source/all_shooting_images_newest/100429.jpg'}, {'emotion': 'A…
217	School shooting threats, even when no guns are fired, can heighten anxiety among students	anonymous-source/all_shooting_images_newest/100349.jpg	[{'emotion': 'Anger', 'intensity': '4', 'reason': "Yes, and we as students should be put in these uncomfortable positions. We shouldn't be worrying about guns!", 'url': 'anonymous-source/all_shooting_images_newest/100349.jpg'}, {'emotion': 'Sadness', 'intensity': '5', 'reason': 'children should be in a safe environment for their education.', 'url': 'anonymous-source/all_shooting_images_newest/100…
218	Town Hall for Our Lives' held by students nationwide to focus on gun reform	anonymous-source/all_shooting_images_newest/10863.jpg	[{'emotion': 'Awe', 'intensity': '2', 'reason': "People are coming together and that's good, this is a good step in creating change for a better and brighter future.", 'url': 'anonymous-source/all_shooting_images_newest/10863.jpg'}, {'emotion': 'Sadness', 'intensity': '4', 'reason': 'adults should be more concerned ', 'url': 'anonymous-source/all_shooting_images_newest/10863.jpg'}, {'emotion': 'A…
220	A Mall Shooting, a Black Man s Death, and a Debate Over Race and Gun Rights	anonymous-source/all_shooting_images_newest/110088.jpg	[{'emotion': 'Contentment', 'intensity': '3', 'reason': 'The headline is very clear and rich.', 'url': 'anonymous-source/all_shooting_images_newest/110088.jpg'}, {'emotion': 'Sadness', 'intensity': '3', 'reason': 'black people are being killed for racial biases ', 'url': 'anonymous-source/all_shooting_images_newest/110088.jpg'}, {'emotion': 'Sadness', 'intensity': '3', 'reason': 'As a minority, I…
224	Federal judge overturns California s 95-year-old ban on handgun advertising	anonymous-source/all_shooting_images_newest/90118.jpg	[{'emotion': 'Fear', 'intensity': '4', 'reason': 'A women holding a handgun in the crew means dangerous which brings me fear. But in the headline, it shows the government is controlling such behavior.', 'url': 'anonymous-source/all_shooting_images_newest/90118.jpg'}, {'emotion': 'Fear', 'intensity': '3', 'reason': 'gun violence is being commercially advertised ', 'url': 'anonymous-source/all_shoo…
226	Let's hope the Salvador Castro Middle School shooting finally wakes up L.A. Unified on school safety	anonymous-source/all_shooting_images_newest/10641.jpg	[{'emotion': 'Sadness', 'intensity': '5', 'reason': 'The pic looks like a disaster. The headline shows LA people generally do not care about school safety.', 'url': 'anonymous-source/all_shooting_images_newest/10641.jpg'}, {'emotion': 'Awe', 'intensity': '4', 'reason': "although this is very sad news I'm hoping it'll be a wake up call for politicians ", 'url': 'anonymous-source/all_shooting_image…
228	Cincinnati Reds to hold Moment of Silence for Fifth Third Center shooting victims	anonymous-source/all_shooting_images_newest/90452.jpg	[{'emotion': 'Sadness', 'intensity': '4', 'reason': 'people are sad about the shooting and "hold Moment of Silence" triggers.', 'url': 'anonymous-source/all_shooting_images_newest/90452.jpg'}, {'emotion': 'Awe', 'intensity': '3', 'reason': 'people who were wrongfully killed are being recognized ', 'url': 'anonymous-source/all_shooting_images_newest/90452.jpg'}, {'emotion': 'Sadness', 'intensity':…
230	After back-to-back mass shootings, America grows numb	anonymous-source/all_shooting_images_newest/110105.jpg	[{'emotion': 'Sadness', 'intensity': '4', 'reason': "The headline states the population is getting careless about the shooting but the pic is showing the victim's families or friends being sad for the shooting.", 'url': 'anonymous-source/all_shooting_images_newest/110105.jpg'}, {'emotion': 'Fear', 'intensity': '5', 'reason': "people shouldn't become desensitized to these shootings because there n…
233	A judge ruled that a website has to suspend downloads for 3D gun plans. But they're already out there	anonymous-source/all_shooting_images_newest/13.jpg	[{'emotion': 'Fear', 'intensity': '4', 'reason': 'Technology makes gun more reachable and people are making such tech more real. But the good side of this title is that the judge is seeing this.', 'url': 'anonymous-source/all_shooting_images_newest/13.jpg'}, {'emotion': 'Fear', 'intensity': '3', 'reason': "suspending these downloads aren't going to do much becuase the blueprints are already sprea…
235	Gays Against Guns claims victory as FedEx ends NRA discount	anonymous-source/all_shooting_images_newest/100338.jpg	[{'emotion': 'Awe', 'intensity': '3', 'reason': "There is someone fighting against society to stop guns. That's good. That someone is gay, a minority which is in lack of rights about anything.", 'url': 'anonymous-source/all_shooting_images_newest/100338.jpg'}, {'emotion': 'Awe', 'intensity': '5', 'reason': 'different social cause groups are supporting gun control', 'url': 'anonymous-source/all_sh…
236	Waffle House shooting illustrates the danger posed by gun-free zones	anonymous-source/all_shooting_images_newest/10708.jpg	[{'emotion': 'Fear', 'intensity': '4', 'reason': 'It connects the shooting with danger and then connects these to gun-free zones. Gun-free zones = danger.', 'url': 'anonymous-source/all_shooting_images_newest/10708.jpg'}, {'emotion': 'Fear', 'intensity': '5', 'reason': 'people who are just going about their lives eating waffles can potentially be killed for no reason', 'url': 'anonymous-source/al…
239	3-D Printed Gun Blueprints Are Back, and Only New Laws Can Stop Them	anonymous-source/all_shooting_images_newest/299.jpg	[{'emotion': 'Fear', 'intensity': '5', 'reason': 'i am worried because anyone can have access to that information anywhere in the world. once the information is out there is no erasing it. this is dangerous as it concerns people building rather than buying. it is more difficult to control random objects used to build guns than actual guns ', 'url': 'anonymous-source/all_shooting_images_newest/299…
244	More than 1,000 Chicago-area students get detention for walking out of school to protest gun violence	anonymous-source/all_shooting_images_newest/10079.jpg	[{'emotion': 'Awe', 'intensity': '5', 'reason': 'the youth should always be present in politics, as they are the future.', 'url': 'anonymous-source/all_shooting_images_newest/10079.jpg'}, {'emotion': 'Awe', 'intensity': '3', 'reason': 'Seeing students take a stand makes me proud', 'url': 'anonymous-source/all_shooting_images_newest/10079.jpg'}, {'emotion': 'Awe', 'intensity': '4', 'reason': "I'm …
245	Teachers who survived shootings at Columbine, Sandy Hook, and Rancho Tehama discuss going back into the classroom.	anonymous-source/all_shooting_images_newest/90037.jpg	[{'emotion': 'Sadness', 'intensity': '5', 'reason': 'i am disappointed in the system and saddened at the trauma this education is facing.', 'url': 'anonymous-source/all_shooting_images_newest/90037.jpg'}, {'emotion': 'Awe', 'intensity': '3', 'reason': 'Seeing these people overcome their fears is inspiring ', 'url': 'anonymous-source/all_shooting_images_newest/90037.jpg'}, {'emotion': 'Sadness', '…
246	I chose to show him empathy': Jewish nurse who treated synagogue shooting suspect	anonymous-source/all_shooting_images_newest/110375.jpg	[{'emotion': 'Fear', 'intensity': '3', 'reason': 'no one should excuse such behavior.', 'url': 'anonymous-source/all_shooting_images_newest/110375.jpg'}, {'emotion': 'Awe', 'intensity': '3', 'reason': 'It is inspiring to see the nurse put her duties as a nurse above her personal feelings', 'url': 'anonymous-source/all_shooting_images_newest/110375.jpg'}, {'emotion': 'Contentment', 'intensity': '4…
249	Guns allowed on campus leads prof to cancel office hours, declare I no longer feel safe : student	anonymous-source/all_shooting_images_newest/335.jpg	[{'emotion': 'Anger', 'intensity': '4', 'reason': 'i am shocked and angered that this is what it has come to. our educators are one of the pillars of our society and they are being forced out of their jobs.', 'url': 'anonymous-source/all_shooting_images_newest/335.jpg'}, {'emotion': 'Fear', 'intensity': '3', 'reason': 'Nobody should fear for their life when going to work', 'url': 'anonymous-sourc…
253	The Capital Gazette shooting and the limits of an assault weapons ban	anonymous-source/all_shooting_images_newest/10151.jpg	[{'emotion': 'Anger', 'intensity': '2', 'reason': 'another shooting occurring makes me sad. this headline also hints that it is going to weighs the cons of a weapon ban.', 'url': 'anonymous-source/all_shooting_images_newest/10151.jpg'}, {'emotion': 'Fear', 'intensity': '3', 'reason': 'I am scared of shootings', 'url': 'anonymous-source/all_shooting_images_newest/10151.jpg'}, {'emotion': 'Fear', '…
255	How We Mourned' memorializes Las Vegas mass shooting	anonymous-source/all_shooting_images_newest/90038.jpg	[{'emotion': 'Sadness', 'intensity': '3', 'reason': 'this should have never happened. innocent lives were lost.', 'url': 'anonymous-source/all_shooting_images_newest/90038.jpg'}, {'emotion': 'Sadness', 'intensity': '3', 'reason': 'The las vegas shooting was tragic', 'url': 'anonymous-source/all_shooting_images_newest/90038.jpg'}, {'emotion': 'Sadness', 'intensity': '5', 'reason': "the shooting sh…
256	Alabama mall shooting: Police admit they killed innocent black man by mistake as true Thanksgiving gunman remains at large	anonymous-source/all_shooting_images_newest/110505.jpg	[{'emotion': 'Anger', 'intensity': '3', 'reason': 'another victim of racial profiling. ', 'url': 'anonymous-source/all_shooting_images_newest/110505.jpg'}, {'emotion': 'Anger', 'intensity': '3', 'reason': 'The police had a racial bias', 'url': 'anonymous-source/all_shooting_images_newest/110505.jpg'}, {'emotion': 'Anger', 'intensity': '5', 'reason': 'they are disproportionately harsher on black m…
258	Kanye West donates $150,000 to family of black security guard killed by police after stopping gunman: report | TheHill	anonymous-source/all_shooting_images_newest/110137.jpg	[{'emotion': 'Awe', 'intensity': '3', 'reason': 'it is an incredibly kind gesture but alas it does not solve any problems. this should not take away from the issue at the center of the donation.', 'url': 'anonymous-source/all_shooting_images_newest/110137.jpg'}, {'emotion': 'Awe', 'intensity': '3', 'reason': 'I dont like kanye west but this is something nice', 'url': 'anonymous-source/all_shootin…
259	Did Florida Yoga Studio Gunman Want to Get Revenge on Women for Rejecting Him?	anonymous-source/all_shooting_images_newest/110078.jpg	[{'emotion': 'Fear', 'intensity': '1', 'reason': 'The revenge came easily', 'url': 'anonymous-source/all_shooting_images_newest/110078.jpg'}, {'emotion': 'Anger', 'intensity': '3', 'reason': 'How can a person get revenge just because a women rejected him and the picture is too flirty which makes me more angry', 'url': 'anonymous-source/all_shooting_images_newest/110078.jpg'}, {'emotion': 'Disgust…
260	Lakers will honor victims of Thousand Oaks shooting at next home game	anonymous-source/all_shooting_images_newest/110373.jpg	[{'emotion': 'Sadness', 'intensity': '1', 'reason': "Can't relate", 'url': 'anonymous-source/all_shooting_images_newest/110373.jpg'}, {'emotion': 'Sadness', 'intensity': '3', 'reason': 'the man in the picture is crying', 'url': 'anonymous-source/all_shooting_images_newest/110373.jpg'}, {'emotion': 'Awe', 'intensity': '3', 'reason': 'it is a nice action but still sad', 'url': 'anonymous-source/all…
261	Donald Trump Addresses Florida Shooting, Rejects Response That Just Makes Us Feel Better	anonymous-source/all_shooting_images_newest/10765.jpg	[{'emotion': 'Fear', 'intensity': '1', 'reason': 'Not sure about what this news is trying to talk about', 'url': 'anonymous-source/all_shooting_images_newest/10765.jpg'}, {'emotion': 'Fear', 'intensity': '1', 'reason': 'everything is neutral', 'url': 'anonymous-source/all_shooting_images_newest/10765.jpg'}, {'emotion': 'Disgust', 'intensity': '3', 'reason': 'he can say whatever he wants but the f…
263	Judge blocks release of 3D-printed gun plans one day after Jacksonville Madden shooting	anonymous-source/all_shooting_images_newest/162.jpg	[{'emotion': 'Fear', 'intensity': '1', 'reason': "The picture doesn't look dangerous", 'url': 'anonymous-source/all_shooting_images_newest/162.jpg'}, {'emotion': 'Contentment', 'intensity': '3', 'reason': 'its good to see judge blocked the release of 3d print gun plans', 'url': 'anonymous-source/all_shooting_images_newest/162.jpg'}, {'emotion': 'Contentment', 'intensity': '3', 'reason': 'as they …
265	The Alabama mall shooting highlights the dangers of owning a gun while black	anonymous-source/all_shooting_images_newest/110512.jpg	[{'emotion': 'Sadness', 'intensity': '1', 'reason': 'disagree with linking owning the gun to race', 'url': 'anonymous-source/all_shooting_images_newest/110512.jpg'}, {'emotion': 'Anger', 'intensity': '3', 'reason': 'this is racist', 'url': 'anonymous-source/all_shooting_images_newest/110512.jpg'}, {'emotion': 'Anger', 'intensity': '3', 'reason': 'people have to die for people to start making acti…
266	Jacksonville councilman on shooting: We've got a problem with guns and faith	anonymous-source/all_shooting_images_newest/412.jpg	[{'emotion': 'Sadness', 'intensity': '1', 'reason': 'not sure about the word faith', 'url': 'anonymous-source/all_shooting_images_newest/412.jpg'}, {'emotion': 'Sadness', 'intensity': '3', 'reason': 'sad to connect the word faith with gun', 'url': 'anonymous-source/all_shooting_images_newest/412.jpg'}, {'emotion': 'Sadness', 'intensity': '3', 'reason': 'bc is the reality', 'url': 'anonymous-sourc…
270	The World Moves On And You Don t. Parents Who Lost Children in School Shootings Find Comfort in a Group No One Wants to Join	anonymous-source/all_shooting_images_newest/110437.jpg	[{'emotion': 'Sadness', 'intensity': '1', 'reason': 'the tone of the picture looks sad', 'url': 'anonymous-source/all_shooting_images_newest/110437.jpg'}, {'emotion': 'Sadness', 'intensity': '3', 'reason': 'it is sad to lose kids and people in the picture seem sad', 'url': 'anonymous-source/all_shooting_images_newest/110437.jpg'}, {'emotion': 'Sadness', 'intensity': '3', 'reason': 'it is not fair…
275	Parkland survivors keep memory of shooting alive	anonymous-source/all_shooting_images_newest/10004.jpg	[{'emotion': 'Sadness', 'intensity': '1', 'reason': 'although the picture is colorful, the headline and the story it tells is sad', 'url': 'anonymous-source/all_shooting_images_newest/10004.jpg'}, {'emotion': 'Contentment', 'intensity': '1', 'reason': 'it is good to see people remembering the deaths and all the hearts in the pic are really cute', 'url': 'anonymous-source/all_shooting_images_newes…
280	Giffords, Nevada Democrats meet 1 year after Vegas shooting	anonymous-source/all_shooting_images_newest/100174.jpg	[{'emotion': 'Fear', 'intensity': '3', 'reason': 'the picture makes me feel sad', 'url': 'anonymous-source/all_shooting_images_newest/100174.jpg'}, {'emotion': 'Fear', 'intensity': '3', 'reason': 'fear', 'url': 'anonymous-source/all_shooting_images_newest/100174.jpg'}, {'emotion': 'Sadness', 'intensity': '4', 'reason': "It's awful that these people have to experience such sad times and deep emoti…
286	When the Second Amendment threatens the First, mass shootings are more likely	anonymous-source/all_shooting_images_newest/10155.jpg	[{'emotion': 'Sadness', 'intensity': '3', 'reason': 'no feeling', 'url': 'anonymous-source/all_shooting_images_newest/10155.jpg'}, {'emotion': 'Fear', 'intensity': '3', 'reason': 'happy', 'url': 'anonymous-source/all_shooting_images_newest/10155.jpg'}, {'emotion': 'Sadness', 'intensity': '4', 'reason': "It's so upsetting that the amendments are threatening one another. ", 'url': 'anonymous-source…
290	Looking back at the Las Vegas mass shooting Photos	anonymous-source/all_shooting_images_newest/100284.jpg	[{'emotion': 'Sadness', 'intensity': '3', 'reason': 'The picture is lonely', 'url': 'anonymous-source/all_shooting_images_newest/100284.jpg'}, {'emotion': 'Anger', 'intensity': '3', 'reason': 'anger', 'url': 'anonymous-source/all_shooting_images_newest/100284.jpg'}, {'emotion': 'Sadness', 'intensity': '5', 'reason': "It's so horrible that such an awful thing happened to so many innocent people. "…
292	Santa Fe High School Shooting Victim s Mother Confronts Ted Cruz at Town Hall: Don t Disrespect My Daughter	anonymous-source/all_shooting_images_newest/90369.jpg	[{'emotion': 'Sadness', 'intensity': '1', 'reason': 'Their facial expression makes me feel serious ', 'url': 'anonymous-source/all_shooting_images_newest/90369.jpg'}, {'emotion': 'Sadness', 'intensity': '3', 'reason': 'sad', 'url': 'anonymous-source/all_shooting_images_newest/90369.jpg'}, {'emotion': 'Sadness', 'intensity': '4', 'reason': "It's so horrible that a man had to experience the death o…
300	Tense moments as community meets after funeral ambush: 'Your church has had many shootings'	anonymous-source/all_shooting_images_newest/100135.jpg	[{'emotion': 'Sadness', 'intensity': '2', 'reason': 'I just think it is a group of guy want to these funeral, they look pretty sad', 'url': 'anonymous-source/all_shooting_images_newest/100135.jpg'}, {'emotion': 'Disgust', 'intensity': '3', 'reason': 'The first feeling I got was disgust as judging from these images, the main community affected was the African American Community. This type of targe…
306	Thousand Oaks shooter is the textbook example of white privilege	anonymous-source/all_shooting_images_newest/110515.jpg	[{'emotion': 'Sadness', 'intensity': '3', 'reason': "I don't know any connection between the image and tex, feel the title is a bit inflammatory", 'url': 'anonymous-source/all_shooting_images_newest/110515.jpg'}, {'emotion': 'Anger', 'intensity': '3', 'reason': 'The first response I had from this is anger as I feel that main stream medias of today throw around the white privilege in every news ar…
310	Pittsburgh synagogue shooting suspect threatened Jewish groups, pushed migrant caravan conspiracies	anonymous-source/all_shooting_images_newest/100147.jpg	[{'emotion': 'Fear', 'intensity': '3', 'reason': 'Why all this gun violence is about race makes me, not white American, feel very uneasy and scared.', 'url': 'anonymous-source/all_shooting_images_newest/100147.jpg'}, {'emotion': 'Sadness', 'intensity': '3', 'reason': 'The first emotion I felt was sadness as a mass shooting based on hate targeting a specific group is extremely disturbing. However,…
314	Trump Gun Slump: Sales Plummet As Americans Don't Buy Gun Control Threats	anonymous-source/all_shooting_images_newest/10714.jpg	[{'emotion': 'Contentment', 'intensity': '3', 'reason': 'Those weapon are actually on-sell shocked me every time I saw. But this news title made me contetment, because Trump deserves it.', 'url': 'anonymous-source/all_shooting_images_newest/10714.jpg'}, {'emotion': 'Amusement', 'intensity': '3', 'reason': 'The first emotion I felt was amusement as the American people are taking gun control threat…
319	This is a very dangerous person,' says lawyer who represented harassment victim of Maryland gunman	anonymous-source/all_shooting_images_newest/10561.jpg	[{'emotion': 'Fear', 'intensity': '3', 'reason': 'he is a bad dude who did bad things', 'url': 'anonymous-source/all_shooting_images_newest/10561.jpg'}, {'emotion': 'Fear', 'intensity': '5', 'reason': "I'm afraid that gunmen like this one would come to a place where I am and other school settings", 'url': 'anonymous-source/all_shooting_images_newest/10561.jpg'}, {'emotion': 'Amusement', 'intensit…
323	Officials across the country fear a new era of untraceable firearms	anonymous-source/all_shooting_images_newest/21.jpg	[{'emotion': 'Fear', 'intensity': '3', 'reason': 'untraceable firearms could be a huge issue for everyone', 'url': 'anonymous-source/all_shooting_images_newest/21.jpg'}, {'emotion': 'Fear', 'intensity': '5', 'reason': "i'm afraid of untraceable guns", 'url': 'anonymous-source/all_shooting_images_newest/21.jpg'}, {'emotion': 'Awe', 'intensity': '3', 'reason': 'a', 'url': 'anonymous-source/all_shoo…
324	Small gun shop that sold weapon to alleged Florida high school shooter 'closes indefinitely'	anonymous-source/all_shooting_images_newest/10087.jpg	[{'emotion': 'Contentment', 'intensity': '3', 'reason': 'they failed and that led to lots of lives lost, so them closing is universally a good thing', 'url': 'anonymous-source/all_shooting_images_newest/10087.jpg'}, {'emotion': 'Excitement', 'intensity': '3', 'reason': 'people are acting out against gun violence', 'url': 'anonymous-source/all_shooting_images_newest/10087.jpg'}, {'emotion': 'Amuse…
326	The deadly peril of not enforcing gun laws	anonymous-source/all_shooting_images_newest/100399.jpg	[{'emotion': 'Sadness', 'intensity': '3', 'reason': 'the results of failed gun control', 'url': 'anonymous-source/all_shooting_images_newest/100399.jpg'}, {'emotion': 'Sadness', 'intensity': '5', 'reason': "i'm devastated that so many people die from gun violence every year", 'url': 'anonymous-source/all_shooting_images_newest/100399.jpg'}, {'emotion': 'Excitement', 'intensity': '3', 'reason': 'a…
330	Gaming community and friends mourn Jacksonville shooting victims	anonymous-source/all_shooting_images_newest/112.jpg	[{'emotion': 'Sadness', 'intensity': '3', 'reason': 'a person was lost do to the actions of a gunmen', 'url': 'anonymous-source/all_shooting_images_newest/112.jpg'}, {'emotion': 'Sadness', 'intensity': '5', 'reason': "upset and sad because mourning continues but laws don't change", 'url': 'anonymous-source/all_shooting_images_newest/112.jpg'}, {'emotion': 'Awe', 'intensity': '3', 'reason': 'a', '…
331	Trump visits Florida hospital after school shooting	anonymous-source/all_shooting_images_newest/10343.jpg	[{'emotion': 'Contentment', 'intensity': '3', 'reason': 'even though he is garbage it was nice he visited, but still a garbage PR move that was only done in that regard. so i guess it sucks but thats not an option', 'url': 'anonymous-source/all_shooting_images_newest/10343.jpg'}, {'emotion': 'Anger', 'intensity': '5', 'reason': 'Trump did nothing to stop gun violence', 'url': 'anonymous-source/al…
337	Parkland survivor details her experience during shooting at Kavanaugh hearing	anonymous-source/all_shooting_images_newest/90149.jpg	[{'emotion': 'Sadness', 'intensity': '3', 'reason': 'it mustve been so painful to relive those memories because the incident itself wasnt enought to make change to ensure childrens safety. children.', 'url': 'anonymous-source/all_shooting_images_newest/90149.jpg'}, {'emotion': 'Awe', 'intensity': '4', 'reason': "I admire the courage this must've taken her", 'url': 'anonymous-source/all_shooting_i…
343	Florida lawmakers pass bill that would allow school staff to carry guns	anonymous-source/all_shooting_images_newest/10093.jpg	[{'emotion': 'Sadness', 'intensity': '4', 'reason': "This is sad because as long as guns aren't going away, this may be necessary.", 'url': 'anonymous-source/all_shooting_images_newest/10093.jpg'}, {'emotion': 'Fear', 'intensity': '3', 'reason': 'More guns in schools is the opposite of what needs to happen', 'url': 'anonymous-source/all_shooting_images_newest/10093.jpg'}, {'emotion': 'Fear', 'int…
346	Synagogue shooting suspect appears in court as Pittsburgh prepares for Trump's visit	anonymous-source/all_shooting_images_newest/100320.jpg	[{'emotion': 'Disgust', 'intensity': '5', 'reason': 'This headline throws partisan bait for no reason.', 'url': 'anonymous-source/all_shooting_images_newest/100320.jpg'}, {'emotion': 'Disgust', 'intensity': '3', 'reason': 'All aspects of this annoy me', 'url': 'anonymous-source/all_shooting_images_newest/100320.jpg'}, {'emotion': 'Sadness', 'intensity': '3', 'reason': "the image shows how there's…
351	New York tightens gun restrictions for domestic abusers	anonymous-source/all_shooting_images_newest/10271.jpg	[{'emotion': 'Disgust', 'intensity': '4', 'reason': 'It reveals how deep the problem is when this is treated as newsworthy.', 'url': 'anonymous-source/all_shooting_images_newest/10271.jpg'}, {'emotion': 'Contentment', 'intensity': '3', 'reason': 'These laws need to be tightened ', 'url': 'anonymous-source/all_shooting_images_newest/10271.jpg'}, {'emotion': 'Contentment', 'intensity': '2', 'reason…
354	Illinois superintendent becomes police officer so she can carry a gun in her school	anonymous-source/all_shooting_images_newest/100035.jpg	[{'emotion': 'Amusement', 'intensity': '4', 'reason': 'I just have to laugh at the absurdity of this being something that is even considered.', 'url': 'anonymous-source/all_shooting_images_newest/100035.jpg'}, {'emotion': 'Anger', 'intensity': '3', 'reason': 'This is insane', 'url': 'anonymous-source/all_shooting_images_newest/100035.jpg'}, {'emotion': 'Fear', 'intensity': '4', 'reason': "it's ab…
357	Poll: most US teens are worried that a shooting could happen at their school	anonymous-source/all_shooting_images_newest/10820.jpg	[{'emotion': 'Fear', 'intensity': '4', 'reason': 'The results of the poll are completely understandable and logical and it make me afraid to someday have kids of my own.', 'url': 'anonymous-source/all_shooting_images_newest/10820.jpg'}, {'emotion': 'Sadness', 'intensity': '3', 'reason': 'Because I often worry about school shootings and it is a horrible way to go through life', 'url': 'anonymous-s…
358	Trevor Noah: Using buckets of rocks to fend off school shooters 'is such a dumb idea'	anonymous-source/all_shooting_images_newest/10701.jpg	[{'emotion': 'Anger', 'intensity': '4', 'reason': "I don't like Trevor Noah because he frequently comments on these issues by reducing them to cheap points.", 'url': 'anonymous-source/all_shooting_images_newest/10701.jpg'}, {'emotion': 'Anger', 'intensity': '3', 'reason': 'Although Trevor Noah is humorous, this is ridiculous ', 'url': 'anonymous-source/all_shooting_images_newest/10701.jpg'}, {'em…
360	Trump's 'Angel Families' weaponize their grief to demonize immigrants	anonymous-source/all_shooting_images_newest/10009.jpg	[{'emotion': 'Amusement', 'intensity': '3', 'reason': "it's two unrelated things.", 'url': 'anonymous-source/all_shooting_images_newest/10009.jpg'}, {'emotion': 'Anger', 'intensity': '4', 'reason': "This is framing immigrants in a bad light when they don't deserve it", 'url': 'anonymous-source/all_shooting_images_newest/10009.jpg'}, {'emotion': 'Anger', 'intensity': '2', 'reason': 'Trump did noth…
362	Pelosi meets with Parkland students and parents, says gun control would be atop Dems agenda	anonymous-source/all_shooting_images_newest/100214.jpg	[{'emotion': 'Contentment', 'intensity': '3', 'reason': 'I agree with this approach.', 'url': 'anonymous-source/all_shooting_images_newest/100214.jpg'}, {'emotion': 'Awe', 'intensity': '3', 'reason': 'Gun control needs to be talked about', 'url': 'anonymous-source/all_shooting_images_newest/100214.jpg'}, {'emotion': 'Contentment', 'intensity': '4', 'reason': 'gov. is doing something.', 'url': 'an…
365	Guns found at 2 schools, threats reported at 3 schools near Santa Fe High School on 1st day back after mass shooting	anonymous-source/all_shooting_images_newest/10157.jpg	[{'emotion': 'Sadness', 'intensity': '3', 'reason': 'I think it is irresponsible to check the issue after it happened.', 'url': 'anonymous-source/all_shooting_images_newest/10157.jpg'}, {'emotion': 'Fear', 'intensity': '3', 'reason': 'School shootings are extremely common', 'url': 'anonymous-source/all_shooting_images_newest/10157.jpg'}, {'emotion': 'Anger', 'intensity': '4', 'reason': 'children …
366	My Father, a Judge, Said a Gun Control Case Was One of His Hardest. Now I See Why.	anonymous-source/all_shooting_images_newest/90325.jpg	[{'emotion': 'Sadness', 'intensity': '3', 'reason': 'After hearing about so many gun incidents, knowing how many people have guns in the United States, and understanding the gun laws in the United States, I can understand the importance and difficulty of gun control.', 'url': 'anonymous-source/all_shooting_images_newest/90325.jpg'}, {'emotion': 'Sadness', 'intensity': '3', 'reason': "Many people …
369	November 13 12:27 PM Man gets prison for shooting at black teen asking for directions	anonymous-source/all_shooting_images_newest/110427.jpg	[{'emotion': 'Anger', 'intensity': '3', 'reason': 'racial discrimination is closely related to gun violence.', 'url': 'anonymous-source/all_shooting_images_newest/110427.jpg'}, {'emotion': 'Sadness', 'intensity': '3', 'reason': 'An innocent man lost his life', 'url': 'anonymous-source/all_shooting_images_newest/110427.jpg'}, {'emotion': 'Anger', 'intensity': '4', 'reason': "that's racism, and the…
371	Baldwin returns to 'SNL' as Trump flip-flopping on gun control	anonymous-source/all_shooting_images_newest/10798.jpg	[{'emotion': 'Anger', 'intensity': '3', 'reason': "I don't think he paid enough attention to this serious issue.", 'url': 'anonymous-source/all_shooting_images_newest/10798.jpg'}, {'emotion': 'Amusement', 'intensity': '3', 'reason': 'It is funny content about a serious issue', 'url': 'anonymous-source/all_shooting_images_newest/10798.jpg'}, {'emotion': 'Anger', 'intensity': '3', 'reason': "that's…
372	On Day Of Mass Shooting, Trump Jokes He Nearly Canceled Speech Due To 'Bad Hair Day'	anonymous-source/all_shooting_images_newest/100217.jpg	[{'emotion': 'Anger', 'intensity': '3', 'reason': "I don't think he paid enough attention to this serious issue.", 'url': 'anonymous-source/all_shooting_images_newest/100217.jpg'}, {'emotion': 'Anger', 'intensity': '3', 'reason': "Trump doesn't take these issues seriously and he sucks", 'url': 'anonymous-source/all_shooting_images_newest/100217.jpg'}, {'emotion': 'Disgust', 'intensity': '3', 'rea…
374	Jacksonville Witness: Gamer Gunman Stared Blankly After Loss	anonymous-source/all_shooting_images_newest/42.jpg	[{'emotion': 'Fear', 'intensity': '3', 'reason': "It's terrible to realize that every gun owner is affected by intense emotions at some point.", 'url': 'anonymous-source/all_shooting_images_newest/42.jpg'}, {'emotion': 'Fear', 'intensity': '3', 'reason': 'this is a scary situation ', 'url': 'anonymous-source/all_shooting_images_newest/42.jpg'}, {'emotion': 'Fear', 'intensity': '3', 'reason': "I d…
375	Teens raised on lockdown drills feel the weight of the Florida shooting	anonymous-source/all_shooting_images_newest/10165.jpg	[{'emotion': 'Sadness', 'intensity': '3', 'reason': 'It is sad to realize the impact of guns on teenagers.', 'url': 'anonymous-source/all_shooting_images_newest/10165.jpg'}, {'emotion': 'Fear', 'intensity': '3', 'reason': "Many people grow up with lockdown drills but don't think it will ever happen to them", 'url': 'anonymous-source/all_shooting_images_newest/10165.jpg'}, {'emotion': 'Sadness', '…
380	More than a year after 9-year-old girl fatally shot during gun safety lesson, her father's case continues	anonymous-source/all_shooting_images_newest/90348.jpg	[{'emotion': 'Sadness', 'intensity': '1', 'reason': 'Why would the writer put these two things together?', 'url': 'anonymous-source/all_shooting_images_newest/90348.jpg'}, {'emotion': 'Disgust', 'intensity': '4', 'reason': 'there is no reason for a child to know how to use a gun this was completely avoidable', 'url': 'anonymous-source/all_shooting_images_newest/90348.jpg'}, {'emotion': 'Sadness',…
390	I Placed Myself Under His Lifeless Body': Parkland Survivor Details School Shooting Experience At Kavanaugh Hearing	anonymous-source/all_shooting_images_newest/90353.jpg	[{'emotion': 'Sadness', 'intensity': '1', 'reason': 'I believe this is a good headline, if the pic match the text', 'url': 'anonymous-source/all_shooting_images_newest/90353.jpg'}, {'emotion': 'Sadness', 'intensity': '4', 'reason': 'this is such a horribly traumatizing situation to recall and it deeply saddens me that she had to experience that', 'url': 'anonymous-source/all_shooting_images_newes…
393	Hate crime charges filed in Pittsburgh synagogue shooting that left 11 dead	anonymous-source/all_shooting_images_newest/100245.jpg	[{'emotion': 'Fear', 'intensity': '1', 'reason': 'cannot see any problem here', 'url': 'anonymous-source/all_shooting_images_newest/100245.jpg'}, {'emotion': 'Sadness', 'intensity': '4', 'reason': 'the reminder of the tragedy overpowers the hate crime charges for me', 'url': 'anonymous-source/all_shooting_images_newest/100245.jpg'}, {'emotion': 'Sadness', 'intensity': '1', 'reason': 'hate crimes …
400	A US Senate candidate wants to give shotguns to homeless people to make a point about gun rights	anonymous-source/all_shooting_images_newest/10076.jpg	[{'emotion': 'Anger', 'intensity': '3', 'reason': 'That is not the answer to this problem', 'url': 'anonymous-source/all_shooting_images_newest/10076.jpg'}, {'emotion': 'Fear', 'intensity': '1', 'reason': 'the picture looks was taken from secret angle. ', 'url': 'anonymous-source/all_shooting_images_newest/10076.jpg'}, {'emotion': 'Amusement', 'intensity': '5', 'reason': 'I really want to know wh…
404	Parkland Students Protest in Tallahassee, Raising Political Pressure for Tougher Gun Laws	anonymous-source/all_shooting_images_newest/10054.jpg	[{'emotion': 'Excitement', 'intensity': '3', 'reason': 'I am glad young people are using their voice', 'url': 'anonymous-source/all_shooting_images_newest/10054.jpg'}, {'emotion': 'Excitement', 'intensity': '1', 'reason': 'good to see that student group fight for the rights that they are looking for', 'url': 'anonymous-source/all_shooting_images_newest/10054.jpg'}, {'emotion': 'Contentment', 'int…
406	Suspected Chicago Mercy Hospital Gunman Had a History of Making Threats	anonymous-source/all_shooting_images_newest/110319.jpg	[{'emotion': 'Sadness', 'intensity': '3', 'reason': 'Sad that sometimes these terrible tragedies could have been prevented', 'url': 'anonymous-source/all_shooting_images_newest/110319.jpg'}, {'emotion': 'Fear', 'intensity': '1', 'reason': 'The news itself is somewhat frightening', 'url': 'anonymous-source/all_shooting_images_newest/110319.jpg'}, {'emotion': 'Anger', 'intensity': '4', 'reason': 'T…
414	Teen Wearing Neo-Nazi Group Clothing Arrested With Cache of Illegal Weapons in Illinois	anonymous-source/all_shooting_images_newest/10062.jpg	[{'emotion': 'Fear', 'intensity': '4', 'reason': 'It is scary to think that these people exist', 'url': 'anonymous-source/all_shooting_images_newest/10062.jpg'}, {'emotion': 'Fear', 'intensity': '1', 'reason': 'the incident in the story would lead to fear', 'url': 'anonymous-source/all_shooting_images_newest/10062.jpg'}, {'emotion': 'Anger', 'intensity': '4', 'reason': 'How do people like this st…
416	California Shooter Had Domestic-Disturbance History	anonymous-source/all_shooting_images_newest/110334.jpg	[{'emotion': 'Sadness', 'intensity': '3', 'reason': 'It is sad that some of these tragedies could be prevented', 'url': 'anonymous-source/all_shooting_images_newest/110334.jpg'}, {'emotion': 'Fear', 'intensity': '1', 'reason': 'Confused, not really know why news are digging out the history of those shooters. Will these history make their crime more forgivable?', 'url': 'anonymous-source/all_shoot…
425	Pittsburgh leaders, residents split over President Trump s trip to synagogue shooting site	anonymous-source/all_shooting_images_newest/100088.jpg	[{'emotion': 'Sadness', 'intensity': '3', 'reason': 'She seems so sad', 'url': 'anonymous-source/all_shooting_images_newest/100088.jpg'}, {'emotion': 'Sadness', 'intensity': '4', 'reason': 'This keeps happening, and I feel empathy for the friends and families of victims being pulled into a political tug-of-war. ', 'url': 'anonymous-source/all_shooting_images_newest/100088.jpg'}, {'emotion': 'Sadn…
426	Inoperable handgun found at Waukegan alternative school	anonymous-source/all_shooting_images_newest/10029.jpg	[{'emotion': 'Fear', 'intensity': '3', 'reason': 'school is not the place guns appear', 'url': 'anonymous-source/all_shooting_images_newest/10029.jpg'}, {'emotion': 'Fear', 'intensity': '3', 'reason': "Although the gun can't operate, it's still a gun and it was in a school. This happens sometimes, but it's always unnerving. ", 'url': 'anonymous-source/all_shooting_images_newest/10029.jpg'}, {'emo…
429	Shopify bans sale of certain firearms, accessories	anonymous-source/all_shooting_images_newest/166.jpg	[{'emotion': 'Contentment', 'intensity': '3', 'reason': 'We should look for safety than sales of guns.', 'url': 'anonymous-source/all_shooting_images_newest/166.jpg'}, {'emotion': 'Amusement', 'intensity': '3', 'reason': 'Who on Earth buys guns through Shopify? ', 'url': 'anonymous-source/all_shooting_images_newest/166.jpg'}, {'emotion': 'Contentment', 'intensity': '3', 'reason': 'this is a good …
431	Sacha Baron Cohen pranks former Arizona sheriff Joe Arpaio into debating gun control with a Shopkins toy	anonymous-source/all_shooting_images_newest/199.jpg	[{'emotion': 'Anger', 'intensity': '3', 'reason': 'you should not make fun at such a serious topic', 'url': 'anonymous-source/all_shooting_images_newest/199.jpg'}, {'emotion': 'Amusement', 'intensity': '4', 'reason': "I remember this episode of the show. It was hilarious to see him succeed in stringing Arpaio along. I also have no sympathy for Arpaio, so I don't feel anything aside from schadenfr…
439	Parkland School Shooting Suspect Nikolas Cruz Spotted Giggling, Laughing While in Jail, Observation Report Says	anonymous-source/all_shooting_images_newest/10255.jpg	[{'emotion': 'Anger', 'intensity': '4', 'reason': 'It angers me that someone who caused so much travesty is laughing in jail.', 'url': 'anonymous-source/all_shooting_images_newest/10255.jpg'}, {'emotion': 'Anger', 'intensity': '4', 'reason': 'how could he laugh and giggle after taking the lives of 17 people? ', 'url': 'anonymous-source/all_shooting_images_newest/10255.jpg'}, {'emotion': 'Disgust'…
441	Sanders gets emotional at child's school shooting question	anonymous-source/all_shooting_images_newest/10279.jpg	[{'emotion': 'Sadness', 'intensity': '3', 'reason': 'Its sad to see kids traumatized from gun violence. Doesnt seem right. ', 'url': 'anonymous-source/all_shooting_images_newest/10279.jpg'}, {'emotion': 'Sadness', 'intensity': '5', 'reason': 'a child should never go through a traumatizing situation such as a school shooting which can harm their mental health for the rest of their lives. They migh…
445	A month before deadly school shooting, Texas students protested gun violence	anonymous-source/all_shooting_images_newest/10379.jpg	[{'emotion': 'Sadness', 'intensity': '3', 'reason': 'Its sad to see how protesting against gun violence isnt enough.', 'url': 'anonymous-source/all_shooting_images_newest/10379.jpg'}, {'emotion': 'Anger', 'intensity': '5', 'reason': 'this situation could have been stopped if an authority figure took action and listened to these students before having their lives being taken.', 'url': 'anonymous-s…
446	8 men, 3 women killed in Pittsburgh synagogue shooting mourned	anonymous-source/all_shooting_images_newest/100333.jpg	[{'emotion': 'Sadness', 'intensity': '3', 'reason': 'Its sad to see victims of gun violence. ', 'url': 'anonymous-source/all_shooting_images_newest/100333.jpg'}, {'emotion': 'Sadness', 'intensity': '5', 'reason': 'there have been too many situations where innocent lives are taken due to gun violence and yet nothing is being done.', 'url': 'anonymous-source/all_shooting_images_newest/100333.jpg'},…
448	A Marjory Stoneman Douglas graduate is making a sculpture to honor the shooting victims	anonymous-source/all_shooting_images_newest/10710.jpg	[{'emotion': 'Awe', 'intensity': '3', 'reason': 'Its great to see awareness regarding school shootings, this is the first step to change.', 'url': 'anonymous-source/all_shooting_images_newest/10710.jpg'}, {'emotion': 'Awe', 'intensity': '4', 'reason': 'these victims should always be remembered, and with the sculpture, their names will forever be present and reminisced. ', 'url': 'anonymous-source…
453	We in Congress should protect students from gun violence as well as we protect ourselves	anonymous-source/all_shooting_images_newest/10310.jpg	[{'emotion': 'Contentment', 'intensity': '3', 'reason': 'I agree that students safety should be higher prioritized', 'url': 'anonymous-source/all_shooting_images_newest/10310.jpg'}, {'emotion': 'Contentment', 'intensity': '5', 'reason': "that's the right mindset they should go forward with. students should always feel safe and well protected especially at school. ", 'url': 'anonymous-source/all_s…
454	Guns send over 8,000 US kids to ER each year, analysis says	anonymous-source/all_shooting_images_newest/100145.jpg	[{'emotion': 'Disgust', 'intensity': '3', 'reason': 'How can you look at these numbers and not see a problem?', 'url': 'anonymous-source/all_shooting_images_newest/100145.jpg'}, {'emotion': 'Anger', 'intensity': '5', 'reason': "if only it wasn't so easy to purchase guns, none of this would have happened. it's such a high number and it's crazy how many lives need to be taken for something minor no…
456	Gun Violence and Pipe Bombs Jolt Voters as Election Season Ends. Again? One Asks.	anonymous-source/all_shooting_images_newest/100334.jpg	[{'emotion': 'Sadness', 'intensity': '3', 'reason': 'Its really depressing to see incident after incident regarding gun violence. We never learn! ', 'url': 'anonymous-source/all_shooting_images_newest/100334.jpg'}, {'emotion': 'Disgust', 'intensity': '5', 'reason': 'Again? really. this needs to end before more lives are taken.', 'url': 'anonymous-source/all_shooting_images_newest/100334.jpg'}, {'…
457	Education Department s proposals on guns in schools sparks outcry	anonymous-source/all_shooting_images_newest/243.jpg	[{'emotion': 'Sadness', 'intensity': '3', 'reason': "Its sad to see how outcry sparked, shouldn't there just be one side regarding gun control.", 'url': 'anonymous-source/all_shooting_images_newest/243.jpg'}, {'emotion': 'Anger', 'intensity': '5', 'reason': 'please think about the students not about your reputation.', 'url': 'anonymous-source/all_shooting_images_newest/243.jpg'}, {'emotion': 'Dis…
465	Florida school shooter heard voices telling him to kill	anonymous-source/all_shooting_images_newest/204.jpg	[{'emotion': 'Fear', 'intensity': '3', 'reason': 'This guy must be crazy.', 'url': 'anonymous-source/all_shooting_images_newest/204.jpg'}, {'emotion': 'Fear', 'intensity': '4', 'reason': 'how could he get a gun like this?', 'url': 'anonymous-source/all_shooting_images_newest/204.jpg'}, {'emotion': 'Disgust', 'intensity': '3', 'reason': 'Don’t blame everything on mental health.', 'url': 'anonymous…
474	Pennsylvania High School Punishes More Than 200 Students for Participating in National Walkout Against Gun Violence	anonymous-source/all_shooting_images_newest/10078.jpg	[{'emotion': 'Anger', 'intensity': '3', 'reason': 'what is the reason for the punishments', 'url': 'anonymous-source/all_shooting_images_newest/10078.jpg'}, {'emotion': 'Anger', 'intensity': '4', 'reason': 'we should encourage this and encourage students to love each other and be friendly', 'url': 'anonymous-source/all_shooting_images_newest/10078.jpg'}, {'emotion': 'Disgust', 'intensity': '3', '…
475	Shooting suspect was able to buy guns despite mental illness	anonymous-source/all_shooting_images_newest/322.jpg	[{'emotion': 'Sadness', 'intensity': '3', 'reason': 'someone with a mental illness have a gun is ridiculous', 'url': 'anonymous-source/all_shooting_images_newest/322.jpg'}, {'emotion': 'Fear', 'intensity': '5', 'reason': 'if someone is dangerous, they should not buy guns', 'url': 'anonymous-source/all_shooting_images_newest/322.jpg'}, {'emotion': 'Sadness', 'intensity': '3', 'reason': 'I’m surpri…
480	Unlikely pair could usher gun rights case to U.S. Supreme Court	anonymous-source/all_shooting_images_newest/238.jpg	[{'emotion': 'Sadness', 'intensity': '4', 'reason': 'It’s sad to think how these issues are affecting people today. ', 'url': 'anonymous-source/all_shooting_images_newest/238.jpg'}, {'emotion': 'Fear', 'intensity': '3', 'reason': "I don't agree with citizen gun ownership.", 'url': 'anonymous-source/all_shooting_images_newest/238.jpg'}, {'emotion': 'Sadness', 'intensity': '4', 'reason': 'Justices …
486	Thousands Attended The First Funerals For The Victims Of The Pittsburgh Synagogue Shooting	anonymous-source/all_shooting_images_newest/100417.jpg	[{'emotion': 'Sadness', 'intensity': '4', 'reason': 'This makes me sad after hearing about this unfortunate event. ', 'url': 'anonymous-source/all_shooting_images_newest/100417.jpg'}, {'emotion': 'Sadness', 'intensity': '3', 'reason': 'It must have left a scar on the psyche of these children', 'url': 'anonymous-source/all_shooting_images_newest/100417.jpg'}, {'emotion': 'Amusement', 'intensity': …
496	Las Vegas marks 1-year shooting anniversary Video	anonymous-source/all_shooting_images_newest/100418.jpg	[{'emotion': 'Sadness', 'intensity': '4', 'reason': 'It’s important to realize and remember these unfortunate events that happened.', 'url': 'anonymous-source/all_shooting_images_newest/100418.jpg'}, {'emotion': 'Sadness', 'intensity': '3', 'reason': 'Grief for the victims', 'url': 'anonymous-source/all_shooting_images_newest/100418.jpg'}, {'emotion': 'Sadness', 'intensity': '4', 'reason': 'sorry…
497	Teaching in the Age of School Shootings	anonymous-source/all_shooting_images_newest/90342.jpg	[{'emotion': 'Sadness', 'intensity': '4', 'reason': 'It’s sad to think about the circumstances students are learning in today. ', 'url': 'anonymous-source/all_shooting_images_newest/90342.jpg'}, {'emotion': 'Sadness', 'intensity': '3', 'reason': 'Grief and despair over school shootings', 'url': 'anonymous-source/all_shooting_images_newest/90342.jpg'}, {'emotion': 'Sadness', 'intensity': '4', 'rea…
502	Trump: Shooting had little to do with gun laws	anonymous-source/all_shooting_images_newest/100482.jpg	[{'emotion': 'Anger', 'intensity': '4', 'reason': 'this is blatantly false and ignores the potential solution to reducing gun violence. ', 'url': 'anonymous-source/all_shooting_images_newest/100482.jpg'}, {'emotion': 'Anger', 'intensity': '5', 'reason': 'This right here shows the stupidity of Trump and how he doesn’t even consider that there’s a connection. ', 'url': 'anonymous-source/all_shootin…
503	Vista, Maker of Ammunition and Recreation Gear, Plans to Sell Off Gun-Making Unit	anonymous-source/all_shooting_images_newest/10480.jpg	[{'emotion': 'Contentment', 'intensity': '3', 'reason': 'it either means that the business does not see this part of its production as lucrative or it is choosing to distance itself from gun-related conversations re: its production.', 'url': 'anonymous-source/all_shooting_images_newest/10480.jpg'}, {'emotion': 'Anger', 'intensity': '3', 'reason': 'It’s frustrating to think that this company still…
505	Memorial Service, 5K Among Events Marking Las Vegas Shooting	anonymous-source/all_shooting_images_newest/90420.jpg	[{'emotion': 'Sadness', 'intensity': '3', 'reason': 'there should not be "fun" events at a memorial for those senselessly killed when the problem itself is not being addressed. ', 'url': 'anonymous-source/all_shooting_images_newest/90420.jpg'}, {'emotion': 'Sadness', 'intensity': '4', 'reason': 'It’s sad that this unfortunate event happened, but it is important to pay tribute to the victims.', 'u…
509	Prominent Republican Donor Issues Ultimatum on Assault Weapons	anonymous-source/all_shooting_images_newest/10011.jpg	[{'emotion': 'Contentment', 'intensity': '3', 'reason': 'the headline is unclear on which ultimatum the donor may be giving. Is it to end gun violence or to ramp up production?', 'url': 'anonymous-source/all_shooting_images_newest/10011.jpg'}, {'emotion': 'Fear', 'intensity': '5', 'reason': 'I don’t understand what other ultimatum there is for this person. After seeing all the shootings, how coul…
513	Assault weapons ban moves forward in Deerfield, April vote likely	anonymous-source/all_shooting_images_newest/10482.jpg	[{'emotion': 'Excitement', 'intensity': '3', 'reason': 'assault weapon bans are needed and real action is being taken by communities. ', 'url': 'anonymous-source/all_shooting_images_newest/10482.jpg'}, {'emotion': 'Fear', 'intensity': '4', 'reason': 'It’s scary to think that people are debating on whether or not to ban guns. Why are people so consistent to own guns.', 'url': 'anonymous-source/all…
514	Student survivors of Florida school shooting making their voices heard	anonymous-source/all_shooting_images_newest/10173.jpg	[{'emotion': 'Awe', 'intensity': '3', 'reason': 'young people impacted by gun violence are using their voices to advocate for their communities. ', 'url': 'anonymous-source/all_shooting_images_newest/10173.jpg'}, {'emotion': 'Awe', 'intensity': '5', 'reason': 'It’s important and meaningful of these survivors to make their voices heard for officials to realize the issue and act upon it. ', 'url': …
519	Florida 'stand your ground' shooter had history of gun threats: Complaint	anonymous-source/all_shooting_images_newest/1.jpg	[{'emotion': 'Fear', 'intensity': '4', 'reason': 'how something like was not noticed', 'url': 'anonymous-source/all_shooting_images_newest/1.jpg'}, {'emotion': 'Sadness', 'intensity': '3', 'reason': 'these bad people should definitely e arrested and taught what to do in the future. the government should not give them the chance to do bad things for the second time.', 'url': 'anonymous-source/all_…
526	Pittsburgh Synagogue Shooting Spurs Outpouring of Grief	anonymous-source/all_shooting_images_newest/100446.jpg	[{'emotion': 'Sadness', 'intensity': '5', 'reason': 'it is sad to see people grieving', 'url': 'anonymous-source/all_shooting_images_newest/100446.jpg'}, {'emotion': 'Sadness', 'intensity': '3', 'reason': 'those people died are innocent. it is so sad the event caused so many people die.', 'url': 'anonymous-source/all_shooting_images_newest/100446.jpg'}, {'emotion': 'Sadness', 'intensity': '3', 'r…
528	Bandmates remember friend killed in series of 'cold-blooded' Nashville shootings	anonymous-source/all_shooting_images_newest/3.jpg	[{'emotion': 'Fear', 'intensity': '4', 'reason': 'victims are just people not so different from us', 'url': 'anonymous-source/all_shooting_images_newest/3.jpg'}, {'emotion': 'Sadness', 'intensity': '3', 'reason': 'it is so sad that a friends that play the music with you die because of being shooted by a gun.', 'url': 'anonymous-source/all_shooting_images_newest/3.jpg'}, {'emotion': 'Fear', 'inten…
529	Florida man threatened people 3 different times before shooting man in 'stand your ground' case	anonymous-source/all_shooting_images_newest/7.jpg	[{'emotion': 'Fear', 'intensity': '4', 'reason': 'it is terrifying to see people dyeing ', 'url': 'anonymous-source/all_shooting_images_newest/7.jpg'}, {'emotion': 'Anger', 'intensity': '3', 'reason': 'the situation is so bad, and I can feel how desperate the victim was while he was being threatening.', 'url': 'anonymous-source/all_shooting_images_newest/7.jpg'}, {'emotion': 'Fear', 'intensity': …
531	Santorum: Instead of calling for gun laws, kids should take CPR classes	anonymous-source/all_shooting_images_newest/10418.jpg	[{'emotion': 'Anger', 'intensity': '4', 'reason': 'we should correct the few wrong people not force so many people on this and normalize it', 'url': 'anonymous-source/all_shooting_images_newest/10418.jpg'}, {'emotion': 'Anger', 'intensity': '5', 'reason': 'it is true that children should learn CPR. But laws about gun control is also necessary, since not every one shot by a gun be be saved by usin…
536	The feds were watching, but unlicensed gun dealer was still able to sell Glock that killed Chicago police officer	anonymous-source/all_shooting_images_newest/100471.jpg	[{'emotion': 'Sadness', 'intensity': '4', 'reason': 'it is sad to see police officer diying and disappointing that nothing prevented it ', 'url': 'anonymous-source/all_shooting_images_newest/100471.jpg'}, {'emotion': 'Anger', 'intensity': '3', 'reason': 'why not arrest those dangerous people and give them chance to do bad things for the second time?', 'url': 'anonymous-source/all_shooting_images_…
548	Chicago hospital shooting underscores doctors' clash with NRA over gun deaths on Twitter	anonymous-source/all_shooting_images_newest/110196.jpg	[{'emotion': 'Anger', 'intensity': '3', 'reason': 'Gun rights advocates will defend gun ownership even when so many people are dying from it. PR campaigns should make them feel guilty.', 'url': 'anonymous-source/all_shooting_images_newest/110196.jpg'}, {'emotion': 'Sadness', 'intensity': '3', 'reason': 'hospital shoting, a place you go to get better has a shooting', 'url': 'anonymous-source/all_s…
559	Calif. teacher arrested for road rage and armed robbery, had loaded gun in classroom during arrest	anonymous-source/all_shooting_images_newest/397.jpg	[{'emotion': 'Fear', 'intensity': '3', 'reason': 'It’s scary to think that there are faculty members keeping armed weapons in their classroom with students in it. ', 'url': 'anonymous-source/all_shooting_images_newest/397.jpg'}, {'emotion': 'Fear', 'intensity': '2', 'reason': 'its disturbing to see teaches carrying guns to school', 'url': 'anonymous-source/all_shooting_images_newest/397.jpg'}, {'…
564	YouTube to Ban Videos Promoting Gun Sales	anonymous-source/all_shooting_images_newest/10277.jpg	[{'emotion': 'Contentment', 'intensity': '3', 'reason': 'This is good that Youtube is banning videos promoting gun sales because it doesn’t add as another influence for people to purchase one. ', 'url': 'anonymous-source/all_shooting_images_newest/10277.jpg'}, {'emotion': 'Contentment', 'intensity': '3', 'reason': "I hope other social media and online platform companies follow YouTube's lead and …
565	Democrats invite students affected by gun violence to intern for the summer	anonymous-source/all_shooting_images_newest/10720.jpg	[{'emotion': 'Contentment', 'intensity': '3', 'reason': 'This is an opportunity for students to work with Democrats, but I hope that they are not using the students as a persuasion technique.', 'url': 'anonymous-source/all_shooting_images_newest/10720.jpg'}, {'emotion': 'Contentment', 'intensity': '3', 'reason': 'These students finally have a platform to build their futures and share their storie…
570	Student survivors of mass shooting say they're disappointed in lawmakers, but vow to keep fighting	anonymous-source/all_shooting_images_newest/10697.jpg	[{'emotion': 'Awe', 'intensity': '5', 'reason': 'This is an ongoing issue that needs to be addressed since there are many shootings happening we see on the news. It’s nice to hear that people won’t stop until there is change. ', 'url': 'anonymous-source/all_shooting_images_newest/10697.jpg'}, {'emotion': 'Sadness', 'intensity': '2', 'reason': "this isn't the first time lawmakers have failed the p…
572	Father of Parkland Shooting Victim Says Brett Kavanaugh 'Turned His Back' to Him at Confirmation Hearing	anonymous-source/all_shooting_images_newest/90190.jpg	[{'emotion': 'Anger', 'intensity': '4', 'reason': 'This makes me angry because officials think they are entitled to act differently and be inconsiderate to anyone they encounter. ', 'url': 'anonymous-source/all_shooting_images_newest/90190.jpg'}, {'emotion': 'Disgust', 'intensity': '2', 'reason': 'it shows that he had no empathy', 'url': 'anonymous-source/all_shooting_images_newest/90190.jpg'}, {…
573	Aurora neighborhood group learns how to stay safe in active shooter situation	anonymous-source/all_shooting_images_newest/90423.jpg	[{'emotion': 'Fear', 'intensity': '4', 'reason': 'It’s good to hear that they are learning of ways to stay safe, but it’s scary to think that this situation can still happen today. ', 'url': 'anonymous-source/all_shooting_images_newest/90423.jpg'}, {'emotion': 'Contentment', 'intensity': '3', 'reason': "It's good to know that people are taking precautions to say safe", 'url': 'anonymous-source/al…
579	Parkland school shooting suspect heard voices to 'Burn, kill, destroy', confession says	anonymous-source/all_shooting_images_newest/15.jpg	[{'emotion': 'Sadness', 'intensity': '4', 'reason': 'I felt fear at first because that sight looked aggressive, and then after I looked into the headline, it recalled my memories of this news, so I feel sad to remember the loss of those innocent kids.', 'url': 'anonymous-source/all_shooting_images_newest/15.jpg'}, {'emotion': 'Fear', 'intensity': '5', 'reason': 'he looks like a dangerous person',…
582	Judge Temporarily Blocks Distribution of Files for Printing Guns	anonymous-source/all_shooting_images_newest/497.jpg	[{'emotion': 'Contentment', 'intensity': '2', 'reason': "The image of Trump looks so determined to do something, so combining that with the content, it made me feel satisfied with the government's actions.", 'url': 'anonymous-source/all_shooting_images_newest/497.jpg'}, {'emotion': 'Contentment', 'intensity': '1', 'reason': 'at least they are stopping guns', 'url': 'anonymous-source/all_shooting_…
586	That's it no more guns.	anonymous-source/all_shooting_images_newest/100483.jpg	[{'emotion': 'Sadness', 'intensity': '5', 'reason': 'I feel sad towards tombs people murdered by guns, and that back image made me feel extremely sad.', 'url': 'anonymous-source/all_shooting_images_newest/100483.jpg'}, {'emotion': 'Contentment', 'intensity': '5', 'reason': 'I completely agree that there should be no more guns', 'url': 'anonymous-source/all_shooting_images_newest/100483.jpg'}, {'e…
588	The Day After Jacksonville's Mass Shooting, They Held Another Gaming Tournament	anonymous-source/all_shooting_images_newest/75.jpg	[{'emotion': 'Anger', 'intensity': '4', 'reason': 'The image plus headline looks like sarcasm.', 'url': 'anonymous-source/all_shooting_images_newest/75.jpg'}, {'emotion': 'Anger', 'intensity': '2', 'reason': 'having fun after a tragedy seem disrespectful', 'url': 'anonymous-source/all_shooting_images_newest/75.jpg'}, {'emotion': 'Sadness', 'intensity': '4', 'reason': 'What does a gaming tournamen…
596	Community mourns after mass shooting at Pittsburgh synagogue	anonymous-source/all_shooting_images_newest/100490.jpg	[{'emotion': 'Sadness', 'intensity': '4', 'reason': 'Candles lightening without people images expresses a mood of sad.', 'url': 'anonymous-source/all_shooting_images_newest/100490.jpg'}, {'emotion': 'Sadness', 'intensity': '5', 'reason': 'this is another tragedy of gun violence', 'url': 'anonymous-source/all_shooting_images_newest/100490.jpg'}, {'emotion': 'Sadness', 'intensity': '3', 'reason': '…
598	End Family Fire Campaign Hopes to Combat Accidental Child Gun Deaths	anonymous-source/all_shooting_images_newest/97.jpg	[{'emotion': 'Sadness', 'intensity': '4', 'reason': "That kid's sight looks unstable, made me feel sad when thinking of the amount of kids dead in accidents by the weapons.", 'url': 'anonymous-source/all_shooting_images_newest/97.jpg'}, {'emotion': 'Contentment', 'intensity': '3', 'reason': 'I agree that children should not have easy access to guns', 'url': 'anonymous-source/all_shooting_images_n…
599	What the FBI Knew About the Accused Florida School Shooter and When	anonymous-source/all_shooting_images_newest/10780.jpg	[{'emotion': 'Fear', 'intensity': '4', 'reason': "It is scary to think the FBI knew the shooter; the actual shooter's face also makes me feel fearful. ", 'url': 'anonymous-source/all_shooting_images_newest/10780.jpg'}, {'emotion': 'Excitement', 'intensity': '3', 'reason': 'Excitement', 'url': 'anonymous-source/all_shooting_images_newest/10780.jpg'}, {'emotion': 'Anger', 'intensity': '3', 'reason'…
601	We've Been Waiting for You.' Barack Obama Praises the Teen Shooting Survivors Fighting for Gun Control	anonymous-source/all_shooting_images_newest/10409.jpg	[{'emotion': 'Contentment', 'intensity': '5', 'reason': 'It is inspiring to see that politicians are supporting young people to speak out about the issue that matter to them. ', 'url': 'anonymous-source/all_shooting_images_newest/10409.jpg'}, {'emotion': 'Excitement', 'intensity': '3', 'reason': 'Excitement', 'url': 'anonymous-source/all_shooting_images_newest/10409.jpg'}, {'emotion': 'Contentmen…
602	Exclusive: Democrats fund spike in gun control ads this election cycle	anonymous-source/all_shooting_images_newest/455.jpg	[{'emotion': 'Amusement', 'intensity': '4', 'reason': 'I found this ad amusing because I wonder if democrats only use gun violence as a way to get elected and then are limited in what they actually do for gun violence in office. ', 'url': 'anonymous-source/all_shooting_images_newest/455.jpg'}, {'emotion': 'Excitement', 'intensity': '3', 'reason': 'Excitement', 'url': 'anonymous-source/all_shootin…
606	Las Vegas shooting memorial marks grim anniversary: 'None of us will ever be the same'	anonymous-source/all_shooting_images_newest/100440.jpg	[{'emotion': 'Sadness', 'intensity': '5', 'reason': 'Seeing the actual vigils for the shooting along with the headline made me feel sadness; felt like I was the funeral. ', 'url': 'anonymous-source/all_shooting_images_newest/100440.jpg'}, {'emotion': 'Excitement', 'intensity': '3', 'reason': 'Excitement', 'url': 'anonymous-source/all_shooting_images_newest/100440.jpg'}, {'emotion': 'Sadness', 'in…
609	Parkland shooting suspect seen 'smiling and giggling' in jail, records show	anonymous-source/all_shooting_images_newest/10902.jpg	[{'emotion': 'Disgust', 'intensity': '5', 'reason': 'this article made me feel disgusted as to why he gets to be alive, smiling and laughing, while his victims are not. ', 'url': 'anonymous-source/all_shooting_images_newest/10902.jpg'}, {'emotion': 'Excitement', 'intensity': '3', 'reason': 'Excitement', 'url': 'anonymous-source/all_shooting_images_newest/10902.jpg'}, {'emotion': 'Disgust', 'inten…
610	These Are The Victims Of The Santa Fe High School Shooting	anonymous-source/all_shooting_images_newest/10044.jpg	[{'emotion': 'Sadness', 'intensity': '5', 'reason': 'seeing the crying face and the word victims really tugs at your heart strings showing the severity of the effects. Feels very tragic. ', 'url': 'anonymous-source/all_shooting_images_newest/10044.jpg'}, {'emotion': 'Excitement', 'intensity': '3', 'reason': 'Excitement', 'url': 'anonymous-source/all_shooting_images_newest/10044.jpg'}, {'emotion':…
616	Community, Religious Leaders Say Pittsburgh Synagogue Shooting 'Will Not Break Us' At Vigil	anonymous-source/all_shooting_images_newest/100445.jpg	[{'emotion': 'Fear', 'intensity': '5', 'reason': 'I remember when the shooting first happened being so scared that something bad happened to someone I knew. So this image and headline bring back those feelings of fear and sadness. ', 'url': 'anonymous-source/all_shooting_images_newest/100445.jpg'}, {'emotion': 'Excitement', 'intensity': '3', 'reason': 'Excitement', 'url': 'anonymous-source/all_sh…
620	Son, I love you': Heartbreaking stories emerge of Thousand Oaks mass shooting victims - ABC News	anonymous-source/all_shooting_images_newest/110517.jpg	[{'emotion': 'Sadness', 'intensity': '4', 'reason': 'such acts of mass shootings are sad to see how people loose their love ones.', 'url': 'anonymous-source/all_shooting_images_newest/110517.jpg'}, {'emotion': 'Sadness', 'intensity': '2', 'reason': "I don't know the story behind this headline", 'url': 'anonymous-source/all_shooting_images_newest/110517.jpg'}, {'emotion': 'Sadness', 'intensity': '…
621	Trump to meet with high school students following Florida shooting	anonymous-source/all_shooting_images_newest/10779.jpg	[{'emotion': 'Contentment', 'intensity': '4', 'reason': 'government must take actions against mass shootings to avoid such things to occur in the future.', 'url': 'anonymous-source/all_shooting_images_newest/10779.jpg'}, {'emotion': 'Disgust', 'intensity': '3', 'reason': 'Children should not be in the same room with Trump.\r\n', 'url': 'anonymous-source/all_shooting_images_newest/10779.jpg'}, {'e…
623	Judge blocks release of blueprints for 3D guns	anonymous-source/all_shooting_images_newest/188.jpg	[{'emotion': 'Contentment', 'intensity': '3', 'reason': 'not only this is right, but at the same time people should be educated against gun violence and should be taught to use technology for betterment of society.', 'url': 'anonymous-source/all_shooting_images_newest/188.jpg'}, {'emotion': 'Contentment', 'intensity': '2', 'reason': 'guns of all shapes and sizes can be printed.', 'url': 'anonymou…
624	NRA reports $55M decline in 2017 funding | TheHill	anonymous-source/all_shooting_images_newest/110342.jpg	[{'emotion': 'Amusement', 'intensity': '3', 'reason': 'it is great to see people interest in buying guns decreasing over time.', 'url': 'anonymous-source/all_shooting_images_newest/110342.jpg'}, {'emotion': 'Awe', 'intensity': '1', 'reason': 'Never thought I would see a day when the NRA had reduced fund raising.', 'url': 'anonymous-source/all_shooting_images_newest/110342.jpg'}, {'emotion': 'Cont…
625	Right-Wing Pundit Taunts Survivors of Parkland Shooting for Losing Weapons-Ban Vote in Florida Legislature	anonymous-source/all_shooting_images_newest/10066.jpg	[{'emotion': 'Contentment', 'intensity': '3', 'reason': 'not a good sign that weapon-ban vote was not passed showing the majority supporting gun culture which needs to be taken seriously.', 'url': 'anonymous-source/all_shooting_images_newest/10066.jpg'}, {'emotion': 'Sadness', 'intensity': '2', 'reason': 'This should not happen', 'url': 'anonymous-source/all_shooting_images_newest/10066.jpg'}, {'…
635	15 Students Have Been Arrested for Threatening School Violence since Parkland Shooting, Officials Say	anonymous-source/all_shooting_images_newest/10100.jpg	[{'emotion': 'Sadness', 'intensity': '3', 'reason': 'it is sad to see students taking part in gun violence.', 'url': 'anonymous-source/all_shooting_images_newest/10100.jpg'}, {'emotion': 'Sadness', 'intensity': '1', 'reason': "My friend's daughter went to school there.", 'url': 'anonymous-source/all_shooting_images_newest/10100.jpg'}, {'emotion': 'Sadness', 'intensity': '2', 'reason': "I'm sad th…
645	Trump s Response to the Pittsburgh Shooting Proves He Doesn t Actually Care About Religious Liberty	anonymous-source/all_shooting_images_newest/100178.jpg	[{'emotion': 'Anger', 'intensity': '4', 'reason': 'Trump did not care about the lives lost in this photo', 'url': 'anonymous-source/all_shooting_images_newest/100178.jpg'}, {'emotion': 'Disgust', 'intensity': '3', 'reason': "Trump and his supporters obviously don't care about people dying if they aren't part of their ingroup", 'url': 'anonymous-source/all_shooting_images_newest/100178.jpg'}, {'em…
651	Donald Trump Supporters Care More About National Anthem Kneeling Than Gun Control, New Poll Indicates	anonymous-source/all_shooting_images_newest/229.jpg	[{'emotion': 'Disgust', 'intensity': '5', 'reason': 'this political figure only cares about nationalism and fake news rather than action problems in the country', 'url': 'anonymous-source/all_shooting_images_newest/229.jpg'}, {'emotion': 'Amusement', 'intensity': '3', 'reason': 'That people care more about something that barely affects them', 'url': 'anonymous-source/all_shooting_images_newest/22…
655	Eiffel Tower, Empire State Building Go Dark To Honor Pittsburgh Synagogue Shooting Victims	anonymous-source/all_shooting_images_newest/100207.jpg	[{'emotion': 'Awe', 'intensity': '5', 'reason': 'other countries can honor lives lost, but even our political leader could not', 'url': 'anonymous-source/all_shooting_images_newest/100207.jpg'}, {'emotion': 'Sadness', 'intensity': '3', 'reason': 'Things like this are grand gestures that keep being done countless times', 'url': 'anonymous-source/all_shooting_images_newest/100207.jpg'}, {'emotion':…
658	Rosanne Cash on California Shootings: We Use Young People as Collateral Damage for the Second Amendment	anonymous-source/all_shooting_images_newest/110472.jpg	[{'emotion': 'Awe', 'intensity': '3', 'reason': "Cash's statement is nothing short of truth", 'url': 'anonymous-source/all_shooting_images_newest/110472.jpg'}, {'emotion': 'Awe', 'intensity': '3', 'reason': 'It is the truth', 'url': 'anonymous-source/all_shooting_images_newest/110472.jpg'}, {'emotion': 'Sadness', 'intensity': '3', 'reason': 'gun violence in the US is out of control and children, …
659	Pittsburgh shooting: Alleged gunman posted stream of anti-Semitic hate online in months and moments before attack	anonymous-source/all_shooting_images_newest/100064.jpg	[{'emotion': 'Fear', 'intensity': '4', 'reason': 'He is a criminal and seeing his face conjures up images of his evil crimes that frighten me', 'url': 'anonymous-source/all_shooting_images_newest/100064.jpg'}, {'emotion': 'Disgust', 'intensity': '4', 'reason': 'it looks like the shooter has no remorse. ', 'url': 'anonymous-source/all_shooting_images_newest/100064.jpg'}, {'emotion': 'Anger', 'inte…
663	Pittsburgh synagogue shooting, mail bombs show US 'toxic' discourse spurs 'deranged' people to act: Ex-DHS chief	anonymous-source/all_shooting_images_newest/100372.jpg	[{'emotion': 'Fear', 'intensity': '5', 'reason': 'The presence of heavily armed military and police officers together indicated that they had encountered a serious threat to PR security, and I could feel the oppressive atmosphere at the time', 'url': 'anonymous-source/all_shooting_images_newest/100372.jpg'}, {'emotion': 'Anger', 'intensity': '3', 'reason': 'the police in their gear makes me uncom…
666	Thousands Gather to Honor Victims of the Mass Shooting with Tears, Candlelight and Song	anonymous-source/all_shooting_images_newest/110414.jpg	[{'emotion': 'Sadness', 'intensity': '5', 'reason': 'I could feel their prayers for the victims and their anger at the misuse of guns.', 'url': 'anonymous-source/all_shooting_images_newest/110414.jpg'}, {'emotion': 'Sadness', 'intensity': '5', 'reason': 'no one should be crying, no one should be mourning lives lost at the hands of guns.', 'url': 'anonymous-source/all_shooting_images_newest/110414…
670	Health care tops guns, economy as voters' top issue	anonymous-source/all_shooting_images_newest/100090.jpg	[{'emotion': 'Sadness', 'intensity': '4', 'reason': 'The stark contrast between the high cost of health care coverage for the population and the relatively low cost of guns makes me sad', 'url': 'anonymous-source/all_shooting_images_newest/100090.jpg'}, {'emotion': 'Contentment', 'intensity': '2', 'reason': "it's unsurprising and a trending topic, it's not unusual for that to be reflected by the …
676	I wanted him to feel compassion : The Jewish nurse who treated the synagogue shooting suspect tells his story	anonymous-source/all_shooting_images_newest/110477.jpg	[{'emotion': 'Sadness', 'intensity': '1', 'reason': "I couldn't fully understand the nurse's thoughts, but I could feel her sadness. In my opinion, the criminal should receive punishment, even if there are various objective reasons that cover up his crime", 'url': 'anonymous-source/all_shooting_images_newest/110477.jpg'}, {'emotion': 'Sadness', 'intensity': '5', 'reason': 'a victim should not be …
680	Mother of Thousand Oaks Victim: I Don t Want Prayers. I Don t Want Thoughts. I Want Gun Control.	anonymous-source/all_shooting_images_newest/110241.jpg	[{'emotion': 'Anger', 'intensity': '5', 'reason': "I completely agree with this woman's statement. Thoughts and prayers can only do so much and it's incredibly frustrating when this kind of thing happens over and over and nothing changes.", 'url': 'anonymous-source/all_shooting_images_newest/110241.jpg'}, {'emotion': 'Sadness', 'intensity': '4', 'reason': "People leaning over their shoulders and …
684	Guns send 8,300 kids to hospitals each year, study finds	anonymous-source/all_shooting_images_newest/100264.jpg	[{'emotion': 'Sadness', 'intensity': '5', 'reason': "this is devastating to learn because kids should never have to suffer through this all because adults can't make decisions on how best to handle this issue.", 'url': 'anonymous-source/all_shooting_images_newest/100264.jpg'}, {'emotion': 'Anger', 'intensity': '4', 'reason': 'children should be protect', 'url': 'anonymous-source/all_shooting_imag…
686	Condolences Aren't Enough.' The Gaming Community Responds After Deadly Jacksonville Madden Shooting	anonymous-source/all_shooting_images_newest/170.jpg	[{'emotion': 'Anger', 'intensity': '5', 'reason': "I agree that condolences really aren't enough in this situation and it makes me angry that this happens over and over and people still struggle to take action and do something about it.", 'url': 'anonymous-source/all_shooting_images_newest/170.jpg'}, {'emotion': 'Sadness', 'intensity': '4', 'reason': "sad for people's death", 'url': 'anonymous-so…
688	This Is Us Honors Victims of Pittsburgh Synagogue Shooting	anonymous-source/all_shooting_images_newest/100136.jpg	[{'emotion': 'Contentment', 'intensity': '2', 'reason': "I respect that this group honored the victims but I'm not that emotionally invested in it.", 'url': 'anonymous-source/all_shooting_images_newest/100136.jpg'}, {'emotion': 'Amusement', 'intensity': '4', 'reason': "He acts like he doesn't care about anything", 'url': 'anonymous-source/all_shooting_images_newest/100136.jpg'}, {'emotion': 'Sadn…
689	Robert Bowers, alleged Pittsburgh synagogue gunman, left trail of chilling, anti-Semitic social media posts	anonymous-source/all_shooting_images_newest/100448.jpg	[{'emotion': 'Anger', 'intensity': '5', 'reason': "it makes me really angry that people leave track records and are obviously dangerous but it's never treated so they end up doing awful things.", 'url': 'anonymous-source/all_shooting_images_newest/100448.jpg'}, {'emotion': 'Fear', 'intensity': '4', 'reason': 'he is so racist. ', 'url': 'anonymous-source/all_shooting_images_newest/100448.jpg'}, {'…
692	After Synagogue Shooting, Trump Retweets Supporter Who Had Retweeted Anti-Semitic Hashtag	anonymous-source/all_shooting_images_newest/100063.jpg	[{'emotion': 'Disgust', 'intensity': '5', 'reason': "I can't believe that the former president could be so consistently insensitive to marginalized groups.", 'url': 'anonymous-source/all_shooting_images_newest/100063.jpg'}, {'emotion': 'Anger', 'intensity': '4', 'reason': 'his attitude does not match his behavior', 'url': 'anonymous-source/all_shooting_images_newest/100063.jpg'}, {'emotion': 'Ang…
693	Gun Rights Activists Defy Court Ruling, Post 3D-Printed Gun Blueprints Online	anonymous-source/all_shooting_images_newest/114.jpg	[{'emotion': 'Anger', 'intensity': '5', 'reason': "this is so frustrating and irritating that groups that even legislation can't really control what people do and it's endangering people.", 'url': 'anonymous-source/all_shooting_images_newest/114.jpg'}, {'emotion': 'Anger', 'intensity': '4', 'reason': "he even doesn't know he is making a wrong decision", 'url': 'anonymous-source/all_shooting_image…
703	Jacksonville mass killing once again proves the left s gun control solution is a fleeting illusion	anonymous-source/all_shooting_images_newest/37.jpg	[{'emotion': 'Fear', 'intensity': '3', 'reason': 'Guns are scary', 'url': 'anonymous-source/all_shooting_images_newest/37.jpg'}, {'emotion': 'Amusement', 'intensity': '3', 'reason': 'shocked', 'url': 'anonymous-source/all_shooting_images_newest/37.jpg'}, {'emotion': 'Sadness', 'intensity': '3', 'reason': 'It is hard to change the current situation ', 'url': 'anonymous-source/all_shooting_images_n…
705	Gun control groups far out-spending gun rights groups for 2018 midterms first time in 20-plus years	anonymous-source/all_shooting_images_newest/100478.jpg	[{'emotion': 'Fear', 'intensity': '3', 'reason': 'Guns are scary', 'url': 'anonymous-source/all_shooting_images_newest/100478.jpg'}, {'emotion': 'Excitement', 'intensity': '3', 'reason': 'great to see people stop gun violence', 'url': 'anonymous-source/all_shooting_images_newest/100478.jpg'}, {'emotion': 'Contentment', 'intensity': '5', 'reason': 'It is a great improvement of gun control', 'url':…
710	Another day of funerals as Pittsburgh mourns synagogue shooting victims	anonymous-source/all_shooting_images_newest/110143.jpg	[{'emotion': 'Fear', 'intensity': '3', 'reason': 'Guns are scary', 'url': 'anonymous-source/all_shooting_images_newest/110143.jpg'}, {'emotion': 'Sadness', 'intensity': '5', 'reason': 'feeling sad for all the people who passed away (helpless)', 'url': 'anonymous-source/all_shooting_images_newest/110143.jpg'}, {'emotion': 'Sadness', 'intensity': '5', 'reason': 'They looks very sad', 'url': 'anonym…
719	Parkland Shooting Suspect Lost Special-Needs Help at School When He Needed It Most	anonymous-source/all_shooting_images_newest/457.jpg	[{'emotion': 'Fear', 'intensity': '3', 'reason': 'the parkland shooting evokes a lot of sadness and fear ', 'url': 'anonymous-source/all_shooting_images_newest/457.jpg'}, {'emotion': 'Sadness', 'intensity': '3', 'reason': 'Feel sad.', 'url': 'anonymous-source/all_shooting_images_newest/457.jpg'}, {'emotion': 'Fear', 'intensity': '2', 'reason': 'lack of resources or authorities picking up on the s…
723	A year after Vegas shooting, ATF emails reveal blame, alarm over bump stocks	anonymous-source/all_shooting_images_newest/100084.jpg	[{'emotion': 'Fear', 'intensity': '3', 'reason': "I'm not really sure what this article is talking about ", 'url': 'anonymous-source/all_shooting_images_newest/100084.jpg'}, {'emotion': 'Contentment', 'intensity': '3', 'reason': "it's back on track", 'url': 'anonymous-source/all_shooting_images_newest/100084.jpg'}, {'emotion': 'Sadness', 'intensity': '1', 'reason': 'I do not know what the ATF is,…
725	Why High School Kids Are Better Than Adults at Talking About Guns	anonymous-source/all_shooting_images_newest/10731.jpg	[{'emotion': 'Sadness', 'intensity': '3', 'reason': 'sad that this is the reality, hopeful for the future generation of leaders ', 'url': 'anonymous-source/all_shooting_images_newest/10731.jpg'}, {'emotion': 'Excitement', 'intensity': '3', 'reason': 'high school students are tend to speak more', 'url': 'anonymous-source/all_shooting_images_newest/10731.jpg'}, {'emotion': 'Awe', 'intensity': '4', …
726	Protesters say security guard Jemel Roberson was proverbial 'good guy with a gun' but was fatally shot by police anyway - Daily Southtown	anonymous-source/all_shooting_images_newest/110197.jpg	[{'emotion': 'Fear', 'intensity': '4', 'reason': 'exhibits the racism that continues to plague American society ', 'url': 'anonymous-source/all_shooting_images_newest/110197.jpg'}, {'emotion': 'Sadness', 'intensity': '3', 'reason': 'he has been shot', 'url': 'anonymous-source/all_shooting_images_newest/110197.jpg'}, {'emotion': 'Sadness', 'intensity': '5', 'reason': 'It is exhausting seeing peopl…
730	Vegas shooting survivors describe year of change, challenges	anonymous-source/all_shooting_images_newest/90160.jpg	[{'emotion': 'Sadness', 'intensity': '3', 'reason': 'sad to think about the profound repercussions of a shooting ', 'url': 'anonymous-source/all_shooting_images_newest/90160.jpg'}, {'emotion': 'Sadness', 'intensity': '3', 'reason': 'people who have not survived do not have the chance to see the world', 'url': 'anonymous-source/all_shooting_images_newest/90160.jpg'}, {'emotion': 'Awe', 'intensity'…
731	After shooting, Texas Governor Greg Abbott calls for action	anonymous-source/all_shooting_images_newest/10538.jpg	[{'emotion': 'Contentment', 'intensity': '3', 'reason': 'we should be more proactive, change should not be in response but these initiates should happen earlier ', 'url': 'anonymous-source/all_shooting_images_newest/10538.jpg'}, {'emotion': 'Contentment', 'intensity': '3', 'reason': 'there is action', 'url': 'anonymous-source/all_shooting_images_newest/10538.jpg'}, {'emotion': 'Anger', 'intensity…
732	As a Parkland Shooting Survivor, This Is What I Want Brett Kavanaugh to Know About Gun Violence	anonymous-source/all_shooting_images_newest/90218.jpg	[{'emotion': 'Awe', 'intensity': '3', 'reason': "proud of her for speaking up, makes me sad people still don't listen ", 'url': 'anonymous-source/all_shooting_images_newest/90218.jpg'}, {'emotion': 'Contentment', 'intensity': '3', 'reason': 'it is necessary', 'url': 'anonymous-source/all_shooting_images_newest/90218.jpg'}, {'emotion': 'Contentment', 'intensity': '4', 'reason': 'these students are…
736	Vigil held for victims of California bar shooting	anonymous-source/all_shooting_images_newest/110235.jpg	[{'emotion': 'Sadness', 'intensity': '4', 'reason': 'how many more vigils will be have until the violence stops ', 'url': 'anonymous-source/all_shooting_images_newest/110235.jpg'}, {'emotion': 'Sadness', 'intensity': '3', 'reason': 'many people died', 'url': 'anonymous-source/all_shooting_images_newest/110235.jpg'}, {'emotion': 'Sadness', 'intensity': '5', 'reason': 'i feel sorry for those mourni…
738	Survivors of Parkland Massacre Held Event Last Month at Site of Jacksonville Mass Shooting	anonymous-source/all_shooting_images_newest/220.jpg	[{'emotion': 'Sadness', 'intensity': '3', 'reason': 'the parkland shooting was such a tragic event, we will never truly forget it', 'url': 'anonymous-source/all_shooting_images_newest/220.jpg'}, {'emotion': 'Contentment', 'intensity': '3', 'reason': 'people get to live alive.', 'url': 'anonymous-source/all_shooting_images_newest/220.jpg'}, {'emotion': 'Sadness', 'intensity': '5', 'reason': 'shoot…
739	Police: Florida man threatened to shoot 'weak Republicans' who voted against Kavanaugh confirmation	anonymous-source/all_shooting_images_newest/100252.jpg	[{'emotion': 'Sadness', 'intensity': '3', 'reason': 'no matter what the others support, they should not be in danger just because of their political opinion', 'url': 'anonymous-source/all_shooting_images_newest/100252.jpg'}, {'emotion': 'Disgust', 'intensity': '4', 'reason': 'threatening others let alone with gun is disgusting', 'url': 'anonymous-source/all_shooting_images_newest/100252.jpg'}, {'…
740	Unbearable grief': Pakistani parents of Santa Fe school shooting victim warn of gun culture in US	anonymous-source/all_shooting_images_newest/110117.jpg	[{'emotion': 'Sadness', 'intensity': '3', 'reason': 'because i think there will be subtle impact and things never stop', 'url': 'anonymous-source/all_shooting_images_newest/110117.jpg'}, {'emotion': 'Sadness', 'intensity': '4', 'reason': 'sad and angry because gun violence continues to break families', 'url': 'anonymous-source/all_shooting_images_newest/110117.jpg'}, {'emotion': 'Sadness', 'inten…
743	Don't panic about 3D gun printing. Yet.	anonymous-source/all_shooting_images_newest/27.jpg	[{'emotion': 'Amusement', 'intensity': '3', 'reason': 'sounds like a scientific article that shares recent fun facts on 3d printing. ', 'url': 'anonymous-source/all_shooting_images_newest/27.jpg'}, {'emotion': 'Fear', 'intensity': '3', 'reason': 'soon available technology that makes gun control more difficult', 'url': 'anonymous-source/all_shooting_images_newest/27.jpg'}, {'emotion': 'Fear', 'int…
746	Trump Says Classmates Knew Florida Shooting Suspect 'Was a Big Problem' and Should Have Reported Him	anonymous-source/all_shooting_images_newest/10897.jpg	[{'emotion': 'Disgust', 'intensity': '5', 'reason': 'Trump just says wayyyyy too much. ', 'url': 'anonymous-source/all_shooting_images_newest/10897.jpg'}, {'emotion': 'Anger', 'intensity': '3', 'reason': 'blaming the kids to some extent of the shooting invoke anger', 'url': 'anonymous-source/all_shooting_images_newest/10897.jpg'}, {'emotion': 'Anger', 'intensity': '3', 'reason': 'You can do more!…
748	How a Seattle nun led a shareholder revolt against gun makers	anonymous-source/all_shooting_images_newest/90485.jpg	[{'emotion': 'Contentment', 'intensity': '4', 'reason': 'good impact to the society ', 'url': 'anonymous-source/all_shooting_images_newest/90485.jpg'}, {'emotion': 'Excitement', 'intensity': '3', 'reason': 'proud of the actions the community takes to push gun control', 'url': 'anonymous-source/all_shooting_images_newest/90485.jpg'}, {'emotion': 'Amusement', 'intensity': '3', 'reason': 'people sho…
749	Kentucky grocery store gunman reportedly told bystander 'whites don't shoot whites'	anonymous-source/all_shooting_images_newest/100260.jpg	[{'emotion': 'Anger', 'intensity': '5', 'reason': 'so, another racist ', 'url': 'anonymous-source/all_shooting_images_newest/100260.jpg'}, {'emotion': 'Disgust', 'intensity': '5', 'reason': 'not only racist but also gun abuser', 'url': 'anonymous-source/all_shooting_images_newest/100260.jpg'}, {'emotion': 'Fear', 'intensity': '5', 'reason': 'This picture makes me feel sick and fear', 'url': 'anon…
753	3D-printed gun maker says he's selling blueprints, despite court order against him	anonymous-source/all_shooting_images_newest/36.jpg	[{'emotion': 'Disgust', 'intensity': '5', 'reason': 'apparantly a bad liar', 'url': 'anonymous-source/all_shooting_images_newest/36.jpg'}, {'emotion': 'Fear', 'intensity': '3', 'reason': 'a conscious decision to distribute dangerous intellectual property should be a crime in itself', 'url': 'anonymous-source/all_shooting_images_newest/36.jpg'}, {'emotion': 'Anger', 'intensity': '3', 'reason': "St…
759	Family outraged after police kill black man mistaken for mall shooter	anonymous-source/all_shooting_images_newest/110433.jpg	[{'emotion': 'Anger', 'intensity': '5', 'reason': "This happens too often & highlights the depth of racism in the US. It's murder and it get excused. ", 'url': 'anonymous-source/all_shooting_images_newest/110433.jpg'}, {'emotion': 'Anger', 'intensity': '3', 'reason': 'Reading about something like this makes me angry.', 'url': 'anonymous-source/all_shooting_images_newest/110433.jpg'}, {'emotion': …
761	Marco Rubio, Bill Nelson push states to get gun restraining order laws	anonymous-source/all_shooting_images_newest/10802.jpg	[{'emotion': 'Contentment', 'intensity': '4', 'reason': "There needs to be change on federal levels, that's where the change will be truly implemented. ", 'url': 'anonymous-source/all_shooting_images_newest/10802.jpg'}, {'emotion': 'Sadness', 'intensity': '3', 'reason': 'What will these proposed laws do?', 'url': 'anonymous-source/all_shooting_images_newest/10802.jpg'}, {'emotion': 'Contentment',…
762	In debate with J.B. Pritzker, Gov. Bruce Rauner says illegal immigration contributes to Chicago gun violence	anonymous-source/all_shooting_images_newest/100222.jpg	[{'emotion': 'Awe', 'intensity': '4', 'reason': "This is interesting but the issue is not rooted in immigration, it's in gun control. ", 'url': 'anonymous-source/all_shooting_images_newest/100222.jpg'}, {'emotion': 'Anger', 'intensity': '3', 'reason': "As far as I know this governor's assumption is false.", 'url': 'anonymous-source/all_shooting_images_newest/100222.jpg'}, {'emotion': 'Disgust', '…
763	U.S. judge extends ban of online 3-D printed gun blueprints	anonymous-source/all_shooting_images_newest/260.jpg	[{'emotion': 'Contentment', 'intensity': '4', 'reason': 'Gun control being implemented in new technology, not just the surface level. ', 'url': 'anonymous-source/all_shooting_images_newest/260.jpg'}, {'emotion': 'Sadness', 'intensity': '3', 'reason': "I'm still confused and uninformed about 3D printed guns. I know what they are, but I'm not sure what the solution to them is.", 'url': 'anonymous-s…
764	Student activists say they will withdraw from NRA protest due to threats: report	anonymous-source/all_shooting_images_newest/140.jpg	[{'emotion': 'Sadness', 'intensity': '4', 'reason': 'More division, the federal movement and corporation have more influence but are not using to protect people. ', 'url': 'anonymous-source/all_shooting_images_newest/140.jpg'}, {'emotion': 'Anger', 'intensity': '3', 'reason': 'Hearing about students being threatened is rage-inducing.', 'url': 'anonymous-source/all_shooting_images_newest/140.jpg'}…
765	Texas school gunman 'confused,' his lawyers say	anonymous-source/all_shooting_images_newest/10209.jpg	[{'emotion': 'Awe', 'intensity': '4', 'reason': "This is intriguing because it could have to do with something psychology related. If the shooter is confused he might have forgotten what happened during the event (there's a term for this) but I need more context. ", 'url': 'anonymous-source/all_shooting_images_newest/10209.jpg'}, {'emotion': 'Disgust', 'intensity': '3', 'reason': 'What is there t…
766	Butler High School Classes Resumed After Shooting For Safety Reasons, Superintendent Says	anonymous-source/all_shooting_images_newest/100042.jpg	[{'emotion': 'Fear', 'intensity': '4', 'reason': "I understand that you can go back to school after a shooting but it's scary. This is going to happen again, maybe not in the same place. ", 'url': 'anonymous-source/all_shooting_images_newest/100042.jpg'}, {'emotion': 'Sadness', 'intensity': '3', 'reason': "I'n not sure what this headline means without reading the article.", 'url': 'anonymous-sour…
767	Highlights: Students Call for Action Across Nation; Florida Lawmakers Fail to Take Up Assault Rifle Bill	anonymous-source/all_shooting_images_newest/10072.jpg	[{'emotion': 'Anger', 'intensity': '4', 'reason': 'This makes me angry because it feels like the younger generations that are affected by gun violence in schools and other public spaces are not validated. ', 'url': 'anonymous-source/all_shooting_images_newest/10072.jpg'}, {'emotion': 'Sadness', 'intensity': '3', 'reason': "I'm sad about the circumstances, but inspired to hear about the actions of…
772	Dem rep: Trump has created a permissive environment where bombings, shootings happen	anonymous-source/all_shooting_images_newest/100229.jpg	[{'emotion': 'Sadness', 'intensity': '4', 'reason': "Sad because it's true. He allows for gun violence and does not stop it. ", 'url': 'anonymous-source/all_shooting_images_newest/100229.jpg'}, {'emotion': 'Sadness', 'intensity': '3', 'reason': 'These are serious claims. Are they backed up?', 'url': 'anonymous-source/all_shooting_images_newest/100229.jpg'}, {'emotion': 'Contentment', 'intensity':…
775	Parkland students sent letter of support from Dunblane shooting massacre survivors	anonymous-source/all_shooting_images_newest/10221.jpg	[{'emotion': 'Sadness', 'intensity': '4', 'reason': "It's terrible that young people share this kind of trauma", 'url': 'anonymous-source/all_shooting_images_newest/10221.jpg'}, {'emotion': 'Sadness', 'intensity': '3', 'reason': 'Survivors of gun violence comforting other survivors of gun violence. The whole situation is awful.', 'url': 'anonymous-source/all_shooting_images_newest/10221.jpg'}, {'…
776	Synagogue gunman kills 11 in America's worst anti-Semitic attack	anonymous-source/all_shooting_images_newest/100069.jpg	[{'emotion': 'Fear', 'intensity': '4', 'reason': 'This is simply scary. Gun violence is very connected to hate crimes. ', 'url': 'anonymous-source/all_shooting_images_newest/100069.jpg'}, {'emotion': 'Anger', 'intensity': '3', 'reason': 'I hate that things like this happen.', 'url': 'anonymous-source/all_shooting_images_newest/100069.jpg'}, {'emotion': 'Disgust', 'intensity': '5', 'reason': 'this…
778	The suspected Pittsburgh shooter allegedly had a following on a social network that many call the far-right's alternative to Twitter here's everything we know about Gab	anonymous-source/all_shooting_images_newest/100307.jpg	[{'emotion': 'Fear', 'intensity': '4', 'reason': 'Social media drives a lot of these people to commit shootings. It is easy to convince delusional people on social networks', 'url': 'anonymous-source/all_shooting_images_newest/100307.jpg'}, {'emotion': 'Sadness', 'intensity': '3', 'reason': 'Reading about things like this makes me sad.', 'url': 'anonymous-source/all_shooting_images_newest/100307.…
779	New Mexico Compound: Alleged Muslim Extremists Who Trained Children to Carry Out School Shootings Have Charges Dropped	anonymous-source/all_shooting_images_newest/135.jpg	[{'emotion': 'Fear', 'intensity': '3', 'reason': 'Because I think children should be treated properly with gun cases.', 'url': 'anonymous-source/all_shooting_images_newest/135.jpg'}, {'emotion': 'Disgust', 'intensity': '3', 'reason': 'Answered previously it just refreshed', 'url': 'anonymous-source/all_shooting_images_newest/135.jpg'}, {'emotion': 'Anger', 'intensity': '3', 'reason': 'his action …
782	Feinstein distorted facts about AR-15, aka 'America's rifle,' NRA says	anonymous-source/all_shooting_images_newest/90026.jpg	[{'emotion': 'Anger', 'intensity': '4', 'reason': 'I think people should have a clear understanding of the case.', 'url': 'anonymous-source/all_shooting_images_newest/90026.jpg'}, {'emotion': 'Fear', 'intensity': '3', 'reason': 'Answered previously it just refreshed', 'url': 'anonymous-source/all_shooting_images_newest/90026.jpg'}, {'emotion': 'Anger', 'intensity': '3', 'reason': 'the facts are d…
786	Las Vegas shooting victims honored in emotional anniversary ceremony: 'Our 58 angels are with us'	anonymous-source/all_shooting_images_newest/100497.jpg	[{'emotion': 'Awe', 'intensity': '2', 'reason': 'I think their sacrifices will be remembered and they deserve to be honored.', 'url': 'anonymous-source/all_shooting_images_newest/100497.jpg'}, {'emotion': 'Excitement', 'intensity': '3', 'reason': 'Answered previously it just refreshed', 'url': 'anonymous-source/all_shooting_images_newest/100497.jpg'}, {'emotion': 'Sadness', 'intensity': '4', 'rea…
788	Faith Hill and Tim McGraw Say They Support 'Sensible' Gun Control	anonymous-source/all_shooting_images_newest/104.jpg	[{'emotion': 'Contentment', 'intensity': '2', 'reason': 'Firearms will be more rationally regulated through the occurrence of people.', 'url': 'anonymous-source/all_shooting_images_newest/104.jpg'}, {'emotion': 'Excitement', 'intensity': '3', 'reason': 'Answered previously it just refreshedAnswered previously it just refreshedAnswered previously it just refreshed', 'url': 'anonymous-source/all_sh…
796	Temple Israel, Gary community mourns Pittsburgh shooting victims: 'We come together to condemn the violence and hate'	anonymous-source/all_shooting_images_newest/110007.jpg	[{'emotion': 'Awe', 'intensity': '2', 'reason': 'I think people will pay more attention to this press and better provide a comfortable environment to live in.', 'url': 'anonymous-source/all_shooting_images_newest/110007.jpg'}, {'emotion': 'Disgust', 'intensity': '3', 'reason': 'Answered previously it just refreshed', 'url': 'anonymous-source/all_shooting_images_newest/110007.jpg'}, {'emotion': 'S…
804	People across the country come together to condemn gun violence Video	anonymous-source/all_shooting_images_newest/10227.jpg	[{'emotion': 'Contentment', 'intensity': '1', 'reason': 'people recognize what an issue gun violence is and are standing together to protest it.', 'url': 'anonymous-source/all_shooting_images_newest/10227.jpg'}, {'emotion': 'Excitement', 'intensity': '4', 'reason': 'it feels like change is happening', 'url': 'anonymous-source/all_shooting_images_newest/10227.jpg'}, {'emotion': 'Excitement', 'inte…
816	Santa Fe High School had armed cops and active shooter drills. Yet 10 people died.	anonymous-source/all_shooting_images_newest/10160.jpg	[{'emotion': 'Sadness', 'intensity': '3', 'reason': 'a school shooting is traumatizing and unnecessary. ', 'url': 'anonymous-source/all_shooting_images_newest/10160.jpg'}, {'emotion': 'Sadness', 'intensity': '4', 'reason': "we can prepare all we want but it's no match for the real thing when it happens", 'url': 'anonymous-source/all_shooting_images_newest/10160.jpg'}, {'emotion': 'Sadness', 'inte…
822	Republican Governor Blames Mass Shootings On Zombies, Abortions, US 'Culture of Death' Not Guns	anonymous-source/all_shooting_images_newest/110152.jpg	[{'emotion': 'Amusement', 'intensity': '3', 'reason': "I don't understand how this is connected. I would want to read more.", 'url': 'anonymous-source/all_shooting_images_newest/110152.jpg'}, {'emotion': 'Anger', 'intensity': '3', 'reason': 'guns should be prohibited', 'url': 'anonymous-source/all_shooting_images_newest/110152.jpg'}, {'emotion': 'Disgust', 'intensity': '4', 'reason': 'Excuses tha…
826	Alleged D.C. white nationalist denied bail on gun-related charges	anonymous-source/all_shooting_images_newest/110280.jpg	[{'emotion': 'Anger', 'intensity': '4', 'reason': 'I do not agree with white nationalists.', 'url': 'anonymous-source/all_shooting_images_newest/110280.jpg'}, {'emotion': 'Contentment', 'intensity': '3', 'reason': 'i agree with it.', 'url': 'anonymous-source/all_shooting_images_newest/110280.jpg'}, {'emotion': 'Excitement', 'intensity': '4', 'reason': 'Nobody should be granted bail with gun charg…
827	Companies develop bulletproof clothing to protect against shootings	anonymous-source/all_shooting_images_newest/10506.jpg	[{'emotion': 'Amusement', 'intensity': '3', 'reason': "this is an interesting topic and I don't know much about it.", 'url': 'anonymous-source/all_shooting_images_newest/10506.jpg'}, {'emotion': 'Fear', 'intensity': '3', 'reason': 'guns should be prohibited', 'url': 'anonymous-source/all_shooting_images_newest/10506.jpg'}, {'emotion': 'Fear', 'intensity': '4', 'reason': "we shouldn't even need bu…
828	James Corden delivers emotional plea for gun control legislation	anonymous-source/all_shooting_images_newest/110404.jpg	[{'emotion': 'Awe', 'intensity': '4', 'reason': 'because the headline is catchy and I know James Cordon.', 'url': 'anonymous-source/all_shooting_images_newest/110404.jpg'}, {'emotion': 'Contentment', 'intensity': '3', 'reason': 'i agree', 'url': 'anonymous-source/all_shooting_images_newest/110404.jpg'}, {'emotion': 'Amusement', 'intensity': '4', 'reason': 'Trying to make a change for the communit…
835	Muslim Americans raise more than $200,000 for those affected by Pittsburgh synagogue shooting	anonymous-source/all_shooting_images_newest/100051.jpg	[{'emotion': 'Contentment', 'intensity': '4', 'reason': 'I am in support of what the title says', 'url': 'anonymous-source/all_shooting_images_newest/100051.jpg'}, {'emotion': 'Contentment', 'intensity': '3', 'reason': 'i agree with this', 'url': 'anonymous-source/all_shooting_images_newest/100051.jpg'}, {'emotion': 'Awe', 'intensity': '4', 'reason': 'Helping others regardless of religious orient…
840	Porn Leads To School Shootings, GOP Congresswoman Says	anonymous-source/all_shooting_images_newest/10028.jpg	[{'emotion': 'Amusement', 'intensity': '1', 'reason': "she's making a stretch ", 'url': 'anonymous-source/all_shooting_images_newest/10028.jpg'}, {'emotion': 'Amusement', 'intensity': '3', 'reason': 'This is your standard Boomer Republican thought', 'url': 'anonymous-source/all_shooting_images_newest/10028.jpg'}, {'emotion': 'Disgust', 'intensity': '5', 'reason': 'what does that even mean. there …
843	Why Was the State Department Ever Involved With the Debate Over 3D-Printed Guns?	anonymous-source/all_shooting_images_newest/352.jpg	[{'emotion': 'Fear', 'intensity': '5', 'reason': 'the image of the gun takes my attention away from the involvement of the State Department', 'url': 'anonymous-source/all_shooting_images_newest/352.jpg'}, {'emotion': 'Fear', 'intensity': '3', 'reason': 'The State Department does wield more power than it should.', 'url': 'anonymous-source/all_shooting_images_newest/352.jpg'}, {'emotion': 'Fear', '…
845	Victims of the Marjorie Stoneman Douglas School shooting receive posthumous degrees Video	anonymous-source/all_shooting_images_newest/10543.jpg	[{'emotion': 'Sadness', 'intensity': '5', 'reason': 'the mother lost her child, who was still so young and had so much more they were meant to do ', 'url': 'anonymous-source/all_shooting_images_newest/10543.jpg'}, {'emotion': 'Contentment', 'intensity': '1', 'reason': 'Good for them!', 'url': 'anonymous-source/all_shooting_images_newest/10543.jpg'}, {'emotion': 'Awe', 'intensity': '3', 'reason': …
847	Parkland students honor those lost at graduation, plan next phase for their gun-control movement	anonymous-source/all_shooting_images_newest/10149.jpg	[{'emotion': 'Sadness', 'intensity': '4', 'reason': "These students have been through so much but they still do what they can to make change happen. It is upsetting that they can't just be normal teenagers without that responsibility ", 'url': 'anonymous-source/all_shooting_images_newest/10149.jpg'}, {'emotion': 'Contentment', 'intensity': '1', 'reason': 'The kids chosen as spokespeople were almo…
849	Designer of 3D printed gun will distribute gun plans despite court order	anonymous-source/all_shooting_images_newest/102.jpg	[{'emotion': 'Anger', 'intensity': '5', 'reason': "He seems proud of what he created and even after being asked to stop, he doesn't ", 'url': 'anonymous-source/all_shooting_images_newest/102.jpg'}, {'emotion': 'Awe', 'intensity': '1', 'reason': "He's got balls, that's for sure.", 'url': 'anonymous-source/all_shooting_images_newest/102.jpg'}, {'emotion': 'Fear', 'intensity': '5', 'reason': 'thats …
850	Donald Trump Touts NRA Plan To Arm Teachers At CPAC	anonymous-source/all_shooting_images_newest/10035.jpg	[{'emotion': 'Disgust', 'intensity': '5', 'reason': 'Trump is promoting a dangerous plan in what can be assumed to be a large audience ', 'url': 'anonymous-source/all_shooting_images_newest/10035.jpg'}, {'emotion': 'Amusement', 'intensity': '1', 'reason': "He's such a clown", 'url': 'anonymous-source/all_shooting_images_newest/10035.jpg'}, {'emotion': 'Disgust', 'intensity': '5', 'reason': 'not s…
854	Chicago activists shut down Lake Shore Drive, speak out against gun violence at Wrigley	anonymous-source/all_shooting_images_newest/340.jpg	[{'emotion': 'Awe', 'intensity': '4', 'reason': 'It is inspiring to see so many people using their voice ', 'url': 'anonymous-source/all_shooting_images_newest/340.jpg'}, {'emotion': 'Amusement', 'intensity': '1', 'reason': 'The headline does not match the image', 'url': 'anonymous-source/all_shooting_images_newest/340.jpg'}, {'emotion': 'Contentment', 'intensity': '5', 'reason': 'good they are p…
858	Mom with 'gut feeling' stops school shooter before planned attack	anonymous-source/all_shooting_images_newest/100374.jpg	[{'emotion': 'Sadness', 'intensity': '2', 'reason': 'Although the children were safe, it is upsetting that that is something they need to be worried about ', 'url': 'anonymous-source/all_shooting_images_newest/100374.jpg'}, {'emotion': 'Awe', 'intensity': '1', 'reason': 'Good for her!', 'url': 'anonymous-source/all_shooting_images_newest/100374.jpg'}, {'emotion': 'Awe', 'intensity': '3', 'reason'…
859	White man convicted after shooting at black teen asking for directions	anonymous-source/all_shooting_images_newest/100211.jpg	[{'emotion': 'Anger', 'intensity': '4', 'reason': 'the shooting seemed to have no purpose, there was a young teen involved who had no reason to be killed. ', 'url': 'anonymous-source/all_shooting_images_newest/100211.jpg'}, {'emotion': 'Sadness', 'intensity': '3', 'reason': 'His wreak of vengeance caused great harm to their families, parents, and children.\xa0', 'url': 'anonymous-source/all_shoot…
860	Somber tributes, dimmed lights on Vegas shooting anniversary	anonymous-source/all_shooting_images_newest/100435.jpg	[{'emotion': 'Sadness', 'intensity': '3', 'reason': 'many people were affected by the Vegas events and it is sad to look back upon that day and what happened because so many lives were lost. ', 'url': 'anonymous-source/all_shooting_images_newest/100435.jpg'}, {'emotion': 'Contentment', 'intensity': '4', 'reason': 'I think this is gratifying news because survivors are very optimistic. On the other…
862	California governor signs raft of gun control bills into law	anonymous-source/all_shooting_images_newest/90422.jpg	[{'emotion': 'Contentment', 'intensity': '4', 'reason': 'it is good that gun control laws are being in place, but I want to really see is news saying that the laws are working and we can see changes.', 'url': 'anonymous-source/all_shooting_images_newest/90422.jpg'}, {'emotion': 'Sadness', 'intensity': '3', 'reason': 'I feel worried about how many innocent people may have died due to assault weapo…
863	Carrying a gun is a privilege regardless of whether you're a civilian or a police officer - Chicago Tribune	anonymous-source/all_shooting_images_newest/110460.jpg	[{'emotion': 'Contentment', 'intensity': '3', 'reason': 'I feel satisfied because I agree with this headline, and historically speaking it is known that guns are misused by civilians and police officers, which is why it is a privilege. ', 'url': 'anonymous-source/all_shooting_images_newest/110460.jpg'}, {'emotion': 'Fear', 'intensity': '3', 'reason': 'There are many armed forces, which means the …
865	Generation Z reported the most mental health problems, and gun violence is the biggest stressor	anonymous-source/all_shooting_images_newest/100017.jpg	[{'emotion': 'Sadness', 'intensity': '4', 'reason': 'it is true, and it is sad to think that something so easily preventable is the leading cause of mental health stressors in my own generation. ', 'url': 'anonymous-source/all_shooting_images_newest/100017.jpg'}, {'emotion': 'Sadness', 'intensity': '3', 'reason': 'I feel sad for the grieving parents of the teens killed in the Parkland school shoo…
866	Grief and Self-Doubt Follow Shooting at Trenton Arts Festival	anonymous-source/all_shooting_images_newest/10450.jpg	[{'emotion': 'Sadness', 'intensity': '5', 'reason': "Trenton is extremely close to where I live, and it's hard to think of my own community being massively affected by gun violence. ", 'url': 'anonymous-source/all_shooting_images_newest/10450.jpg'}, {'emotion': 'Contentment', 'intensity': '3', 'reason': 'I feel gratified that people are gathering to honor victims of mass shootings. On the other h…
867	NRA Spokesperson Dana Loesch on Brett Kavanaugh Allegations: 'Our Nation's Boys Are at Stake'	anonymous-source/all_shooting_images_newest/90311.jpg	[{'emotion': 'Disgust', 'intensity': '5', 'reason': 'the misogyny and gender stereotyping that is done by a woman, in this case, is disgusting and shows how much work is still left to do in gender equality.', 'url': 'anonymous-source/all_shooting_images_newest/90311.jpg'}, {'emotion': 'Contentment', 'intensity': '3', 'reason': 'I feel happy for the donors.', 'url': 'anonymous-source/all_shooting_…
870	Dentist Killed in Pittsburgh Synagogue Shooting Tried to 'Heal the World' With Work Treating Immigrants and Refugees	anonymous-source/all_shooting_images_newest/100437.jpg	[{'emotion': 'Sadness', 'intensity': '4', 'reason': 'it is sad to think that a great person, using their career to do amazing things and help vulnerable people, is gone because of a shooting that should have never happened if gun control laws were more prominent. ', 'url': 'anonymous-source/all_shooting_images_newest/100437.jpg'}, {'emotion': 'Contentment', 'intensity': '4', 'reason': 'I feel hap…
871	Morning Spin: Democrats still looking votes to override Rauner's gun store licensing veto	anonymous-source/all_shooting_images_newest/10648.jpg	[{'emotion': 'Fear', 'intensity': '1', 'reason': "it is fearing to think that another law may make it easier for people to obtain guns. However, I don't have a very intense feeling about this news headline because I do not know who Rauner is or what their gun store licensing veto is about.", 'url': 'anonymous-source/all_shooting_images_newest/10648.jpg'}, {'emotion': 'Fear', 'intensity': '3', 're…
872	Brett Kavanaugh Snubs Father Of Parkland Shooting Victim	anonymous-source/all_shooting_images_newest/90437.jpg	[{'emotion': 'Disgust', 'intensity': '4', 'reason': 'it is disgusting that someone who lost a child to a school shooting was disrespected by a Supreme Court Justice. This father has been through so much and only tried to show respect, yet he was disrespected by someone in high influence. ', 'url': 'anonymous-source/all_shooting_images_newest/90437.jpg'}, {'emotion': 'Fear', 'intensity': '3', 'rea…
875	Why it Matters: Parkland shooting survivors on what's driving them to vote	anonymous-source/all_shooting_images_newest/100131.jpg	[{'emotion': 'Excitement', 'intensity': '5', 'reason': 'it is so nice to see young people speaking out and promoting people to go and vote, even after a traumatic experience. They are using something that happened to them that was traumatic to do good things and promote good things. ', 'url': 'anonymous-source/all_shooting_images_newest/100131.jpg'}, {'emotion': 'Contentment', 'intensity': '3', '…
877	NRA TV Airs Photo of Thomas The Tank Engine In KKK Hood In 'Ethnic Diversity' Segment	anonymous-source/all_shooting_images_newest/90366.jpg	[{'emotion': 'Anger', 'intensity': '5', 'reason': 'it is angering to see the NRA using childhood characters dressing as white supremacist figures to show that they are diverse when in reality they are not. ', 'url': 'anonymous-source/all_shooting_images_newest/90366.jpg'}, {'emotion': 'Fear', 'intensity': '4', 'reason': 'I feel sad because the NRA is out of business.', 'url': 'anonymous-source/al…
878	Miami Students Take Aim At Gun Violence At Do The Right Thing Event	anonymous-source/all_shooting_images_newest/90313.jpg	[{'emotion': 'Contentment', 'intensity': '4', 'reason': 'it is nice to see students pledging to not use violence, and it is nice to see the young generation making actual change. ', 'url': 'anonymous-source/all_shooting_images_newest/90313.jpg'}, {'emotion': 'Awe', 'intensity': '4', 'reason': 'I think this girl is great since she is trying to protect the students during school shootings.', 'url':…
879	White man pulls gun in confrontation with black Florida A&M students	anonymous-source/all_shooting_images_newest/90451.jpg	[{'emotion': 'Disgust', 'intensity': '3', 'reason': 'There is no need to pull out a gun in this situation. ', 'url': 'anonymous-source/all_shooting_images_newest/90451.jpg'}, {'emotion': 'Anger', 'intensity': '5', 'reason': 'the violence between different races', 'url': 'anonymous-source/all_shooting_images_newest/90451.jpg'}, {'emotion': 'Anger', 'intensity': '5', 'reason': 'this man should not …
884	Boulder, Colorado, unanimously votes to ban assault weapons, high-capacity magazines	anonymous-source/all_shooting_images_newest/10496.jpg	[{'emotion': 'Contentment', 'intensity': '3', 'reason': 'It is good that they are banning these. It is unnecessary for someone to have one. ', 'url': 'anonymous-source/all_shooting_images_newest/10496.jpg'}, {'emotion': 'Contentment', 'intensity': '3', 'reason': 'gun violence is being controlled', 'url': 'anonymous-source/all_shooting_images_newest/10496.jpg'}, {'emotion': 'Awe', 'intensity': '3'…
885	Pro-gun advocates are stepping up their attacks on Parkland students David Hogg and Emma Gonz??lez.	anonymous-source/all_shooting_images_newest/10811.jpg	[{'emotion': 'Anger', 'intensity': '3', 'reason': "Just because you are pro-gun, doesn't mean you should go after a survivor of a tragic event. ", 'url': 'anonymous-source/all_shooting_images_newest/10811.jpg'}, {'emotion': 'Anger', 'intensity': '3', 'reason': 'for supporting guns', 'url': 'anonymous-source/all_shooting_images_newest/10811.jpg'}, {'emotion': 'Anger', 'intensity': '5', 'reason': '…
890	A year after shooting, Vegas voters see strengthened community	anonymous-source/all_shooting_images_newest/90456.jpg	[{'emotion': 'Excitement', 'intensity': '4', 'reason': 'Building a strong community is a good way to recover from horrific events. ', 'url': 'anonymous-source/all_shooting_images_newest/90456.jpg'}, {'emotion': 'Contentment', 'intensity': '3', 'reason': 'Gun violence is partly being controlled.', 'url': 'anonymous-source/all_shooting_images_newest/90456.jpg'}, {'emotion': 'Awe', 'intensity': '3',…
892	Brett Kavanaugh apparently wouldn't shake hands with a Parkland shooting victim's dad	anonymous-source/all_shooting_images_newest/90301.jpg	[{'emotion': 'Disgust', 'intensity': '4', 'reason': 'Just disgraceful and disrespectful.', 'url': 'anonymous-source/all_shooting_images_newest/90301.jpg'}, {'emotion': 'Anger', 'intensity': '3', 'reason': 'gun violence ', 'url': 'anonymous-source/all_shooting_images_newest/90301.jpg'}, {'emotion': 'Disgust', 'intensity': '3', 'reason': "Kavanaugh is a terrible person and should've been honored to…
896	Carpenter erects wooden crosses in honor of shooting rampage victims	anonymous-source/all_shooting_images_newest/110405.jpg	[{'emotion': 'Contentment', 'intensity': '5', 'reason': 'The carpenter did it out of respect and that is what makes me content. ', 'url': 'anonymous-source/all_shooting_images_newest/110405.jpg'}, {'emotion': 'Sadness', 'intensity': '3', 'reason': 'for people lost their lives in shooting cases', 'url': 'anonymous-source/all_shooting_images_newest/110405.jpg'}, {'emotion': 'Sadness', 'intensity': …
899	I think I'm going to kill the president,' Utah man allegedly told police after 6 guns found in car: reports	anonymous-source/all_shooting_images_newest/90303.jpg	[{'emotion': 'Fear', 'intensity': '5', 'reason': 'this is a scary situation', 'url': 'anonymous-source/all_shooting_images_newest/90303.jpg'}, {'emotion': 'Fear', 'intensity': '4', 'reason': 'I feel scared when I saw 6 guns were founded in his car, and I feel that he has already planned his murder for a while.', 'url': 'anonymous-source/all_shooting_images_newest/90303.jpg'}, {'emotion': 'Fear', …
908	White man takes out gun to stop black students from entering apartment building	anonymous-source/all_shooting_images_newest/90385.jpg	[{'emotion': 'Disgust', 'intensity': '5', 'reason': 'this is a disgusting thing to do', 'url': 'anonymous-source/all_shooting_images_newest/90385.jpg'}, {'emotion': 'Anger', 'intensity': '5', 'reason': "even though the 2nd Amendment gives people's right to keep guns, it is not used to threaten others, especially in a world that advocates for equality, it will definitely cause anger when seeing a …
924	Stunned by a surge in mass shootings, California lawmakers send nine gun-control bills to the governor	anonymous-source/all_shooting_images_newest/90446.jpg	[{'emotion': 'Contentment', 'intensity': '3', 'reason': 'it is necessary to do that, I believe more regulations towards gun control is a piece of good news.', 'url': 'anonymous-source/all_shooting_images_newest/90446.jpg'}, {'emotion': 'Contentment', 'intensity': '3', 'reason': 'California lawmakers are doing their job and trying to reduce gun violence with gun-control bills', 'url': 'anonymous-s…
932	Big banks take a stand against the gun industry	anonymous-source/all_shooting_images_newest/10589.jpg	[{'emotion': 'Contentment', 'intensity': '1', 'reason': 'we definitely need more power and authority in this anti-gun battle', 'url': 'anonymous-source/all_shooting_images_newest/10589.jpg'}, {'emotion': 'Amusement', 'intensity': '3', 'reason': 'The fight for gun control seems to not only be coming from the public but also from banks that provide funding to those gun industries.', 'url': 'anonymo…
934	Memorial in downtown Las Vegas honors victims of October shooting rampage	anonymous-source/all_shooting_images_newest/90459.jpg	[{'emotion': 'Sadness', 'intensity': '1', 'reason': 'These kind of activity would help people recognize the impact of having gun in the society', 'url': 'anonymous-source/all_shooting_images_newest/90459.jpg'}, {'emotion': 'Sadness', 'intensity': '3', 'reason': 'Memorial is displaying victims of shooting.', 'url': 'anonymous-source/all_shooting_images_newest/90459.jpg'}, {'emotion': 'Awe', 'inten…
937	This Is Us Emotionally Honors Pittsburgh After Deadly Synagogue Shooting	anonymous-source/all_shooting_images_newest/110367.jpg	[{'emotion': 'Sadness', 'intensity': '1', 'reason': 'I do not understand what this message meant', 'url': 'anonymous-source/all_shooting_images_newest/110367.jpg'}, {'emotion': 'Contentment', 'intensity': '3', 'reason': 'A tv show demonstrated its respects for the lost lives in a shooting.', 'url': 'anonymous-source/all_shooting_images_newest/110367.jpg'}, {'emotion': 'Sadness', 'intensity': '2',…
938	Gunman casually bought water moments before massacre that wounded Gabrielle Giffords, new FBI video shows	anonymous-source/all_shooting_images_newest/10357.jpg	[{'emotion': 'Fear', 'intensity': '4', 'reason': 'it shows how easy it is to purchase a gun and commit violence', 'url': 'anonymous-source/all_shooting_images_newest/10357.jpg'}, {'emotion': 'Fear', 'intensity': '4', 'reason': 'it shows that the gunman was just blending in with the crowd and makes me cautious of everyone around me in public', 'url': 'anonymous-source/all_shooting_images_newest/10…
948	Florida school shooting suspect was investigated by state after self-harming	anonymous-source/all_shooting_images_newest/10395.jpg	[{'emotion': 'Fear', 'intensity': '4', 'reason': 'after a massacre occurred, the suspect was shown to have mental issues. Scary to know that if some laws were in place this could all be condemned. ', 'url': 'anonymous-source/all_shooting_images_newest/10395.jpg'}, {'emotion': 'Anger', 'intensity': '4', 'reason': 'it makes me angry that the suspect is being pitied by the court when he did commit a…
954	Do Gun Control Laws Save Lives? Major Study Says Lack Of Federal Funding For Research Means We Still Don't Know	anonymous-source/all_shooting_images_newest/10394.jpg	[{'emotion': 'Fear', 'intensity': '4', 'reason': 'without any gun control laws, people are losing their lives and even with advocating its not wokring', 'url': 'anonymous-source/all_shooting_images_newest/10394.jpg'}, {'emotion': 'Sadness', 'intensity': '4', 'reason': 'it is sad to hear that there is not much aid and support for gun control laws and it is causing many deaths', 'url': 'anonymous-s…
961	Man Accused of Threatening to Shoot Donald Trump Arrested After Months-Long Manhunt	anonymous-source/all_shooting_images_newest/90137.jpg	[{'emotion': 'Amusement', 'intensity': '2', 'reason': "Trump's face and the headline combo is slightly ironic.", 'url': 'anonymous-source/all_shooting_images_newest/90137.jpg'}, {'emotion': 'Contentment', 'intensity': '3', 'reason': "I'm satisfied with the result.", 'url': 'anonymous-source/all_shooting_images_newest/90137.jpg'}, {'emotion': 'Sadness', 'intensity': '3', 'reason': 'It is upsetting…
963	Senators introduce bill to block terrorists from buying guns	anonymous-source/all_shooting_images_newest/10265.jpg	[{'emotion': 'Contentment', 'intensity': '2', 'reason': 'I liked the headline but was also slightly scared/confused. This headline evoked further curiosity. ', 'url': 'anonymous-source/all_shooting_images_newest/10265.jpg'}, {'emotion': 'Contentment', 'intensity': '4', 'reason': "I'm satisfied with the result. But I'm also worried about the negative consequences of judging people's guidelines.", …
966	Donations to the NRA tripled after the Parkland shooting	anonymous-source/all_shooting_images_newest/10386.jpg	[{'emotion': 'Disgust', 'intensity': '4', 'reason': 'Angry, confused, and disgusted because of content of the headlines.', 'url': 'anonymous-source/all_shooting_images_newest/10386.jpg'}, {'emotion': 'Anger', 'intensity': '2', 'reason': 'thy should not donate to Nra, especially in this time', 'url': 'anonymous-source/all_shooting_images_newest/10386.jpg'}, {'emotion': 'Disgust', 'intensity': '5',…
967	EA Cancels Madden Classic Qualifier Events In Wake Of Mass Shooting	anonymous-source/all_shooting_images_newest/145.jpg	[{'emotion': 'Awe', 'intensity': '2', 'reason': "Felt deep sense of respect and peace because of people's faces and setting.", 'url': 'anonymous-source/all_shooting_images_newest/145.jpg'}, {'emotion': 'Contentment', 'intensity': '2', 'reason': 'It is the right thing to do in a dangerous time', 'url': 'anonymous-source/all_shooting_images_newest/145.jpg'}, {'emotion': 'Contentment', 'intensity': …
969	The Trump Slump : With a Friend in the White House, Gun Sales Sag	anonymous-source/all_shooting_images_newest/314.jpg	[{'emotion': 'Contentment', 'intensity': '3', 'reason': 'Made me slightly curious about how trump has caused gun sales to decrease.', 'url': 'anonymous-source/all_shooting_images_newest/314.jpg'}, {'emotion': 'Fear', 'intensity': '2', 'reason': "I'm afraid of guns", 'url': 'anonymous-source/all_shooting_images_newest/314.jpg'}, {'emotion': 'Fear', 'intensity': '4', 'reason': 'Why are sales going …
970	President Trump's school safety commission will not be looking at role of guns, chair says	anonymous-source/all_shooting_images_newest/10518.jpg	[{'emotion': 'Anger', 'intensity': '4', 'reason': 'Angered at the callousness of headline and the image.', 'url': 'anonymous-source/all_shooting_images_newest/10518.jpg'}, {'emotion': 'Anger', 'intensity': '2', 'reason': "I'm not satisfied with the result.", 'url': 'anonymous-source/all_shooting_images_newest/10518.jpg'}, {'emotion': 'Anger', 'intensity': '5', 'reason': 'School shootings are only…
971	Watchdog groups to file complaint against Montana candidate alleging coordination with NRA	anonymous-source/all_shooting_images_newest/90138.jpg	[{'emotion': 'Contentment', 'intensity': '3', 'reason': 'Want to learn more about how the story will develop.', 'url': 'anonymous-source/all_shooting_images_newest/90138.jpg'}, {'emotion': 'Contentment', 'intensity': '3', 'reason': "I'm satisfied with the result.", 'url': 'anonymous-source/all_shooting_images_newest/90138.jpg'}, {'emotion': 'Contentment', 'intensity': '4', 'reason': 'I understand…
972	Videos show calm man shooting five as police close in	anonymous-source/all_shooting_images_newest/90271.jpg	[{'emotion': 'Sadness', 'intensity': '2', 'reason': 'Seriousness of the issue is clear because of the image and facial expressions. "Calm man" also evokes anger.', 'url': 'anonymous-source/all_shooting_images_newest/90271.jpg'}, {'emotion': 'Fear', 'intensity': '2', 'reason': 'This is kinda scary', 'url': 'anonymous-source/all_shooting_images_newest/90271.jpg'}, {'emotion': 'Fear', 'intensity': '…
973	Dems introduce bill banning assault weapons	anonymous-source/all_shooting_images_newest/10268.jpg	[{'emotion': 'Contentment', 'intensity': '3', 'reason': 'Felt supportive of statement, but image is slightly scary too.', 'url': 'anonymous-source/all_shooting_images_newest/10268.jpg'}, {'emotion': 'Contentment', 'intensity': '3', 'reason': "I'm satisfied with the result.", 'url': 'anonymous-source/all_shooting_images_newest/10268.jpg'}, {'emotion': 'Excitement', 'intensity': '5', 'reason': 'if …
975	Clippers, Bucks wear T-shirts in warmups that say Enough with names of Thousand Oaks shooting victims	anonymous-source/all_shooting_images_newest/110101.jpg	[{'emotion': 'Awe', 'intensity': '4', 'reason': 'The lighting, names and headlines combine to create a feeling of deep respect.', 'url': 'anonymous-source/all_shooting_images_newest/110101.jpg'}, {'emotion': 'Sadness', 'intensity': '4', 'reason': 'Those victims are poor the gun violence should be stopped', 'url': 'anonymous-source/all_shooting_images_newest/110101.jpg'}, {'emotion': 'Awe', 'inten…
977	An Open Letter to My Camper: The Pen is Mightier than the Gun HS Insider	anonymous-source/all_shooting_images_newest/175.jpg	[{'emotion': 'Awe', 'intensity': '2', 'reason': 'Picture was thought-provoking and hashtags further added to the effect. The hand-drawn gun and red letters makes this image personal and the message is strong.', 'url': 'anonymous-source/all_shooting_images_newest/175.jpg'}, {'emotion': 'Contentment', 'intensity': '2', 'reason': 'It is nice to see that even children are being aware of gun issues.',…
979	Right and Left React to the Gun Control Debate After the Florida Shooting	anonymous-source/all_shooting_images_newest/10598.jpg	[{'emotion': 'Contentment', 'intensity': '5', 'reason': 'This means a conversation to me rather than a debate. People are talking about their views together. ', 'url': 'anonymous-source/all_shooting_images_newest/10598.jpg'}, {'emotion': 'Awe', 'intensity': '4', 'reason': 'that it takes an event such as this to bring the two politcal parties together ', 'url': 'anonymous-source/all_shooting_image…
983	In a rare move, corporate America presses for gun-control restrictions 'to take a stand'	anonymous-source/all_shooting_images_newest/10238.jpg	[{'emotion': 'Contentment', 'intensity': '4', 'reason': 'It makes me happy to know that corporations are taking action to protect people. They are the ones with the most power in the country and their say has a grand impact. ', 'url': 'anonymous-source/all_shooting_images_newest/10238.jpg'}, {'emotion': 'Excitement', 'intensity': '4', 'reason': 'this is a step in the right direction. people who h…
985	Pittsburgh holds last funeral in synagogue shooting for oldest victim	anonymous-source/all_shooting_images_newest/110057.jpg	[{'emotion': 'Sadness', 'intensity': '4', 'reason': 'Mainly because this is not the last time this will happen. It will happen again and we will see more funerals and headlines like these. ', 'url': 'anonymous-source/all_shooting_images_newest/110057.jpg'}, {'emotion': 'Sadness', 'intensity': '4', 'reason': 'this event makes hurts deeply. ', 'url': 'anonymous-source/all_shooting_images_newest/110…
986	NRA Chief Defends Gun Rights in Wake of School Shooting	anonymous-source/all_shooting_images_newest/10363.jpg	[{'emotion': 'Disgust', 'intensity': '4', 'reason': "These people only care about themselves and their money. They waste people's time with their hypocritical ideas. ", 'url': 'anonymous-source/all_shooting_images_newest/10363.jpg'}, {'emotion': 'Disgust', 'intensity': '5', 'reason': 'that he would double-down on his beliefs after a tragedy that is fueled by organizations like the NRA. ', 'url': …
992	No one deserves to die over a video game': survivors recall chaos of Florida shooting	anonymous-source/all_shooting_images_newest/494.jpg	[{'emotion': 'Sadness', 'intensity': '5', 'reason': "This does not have to do with the video games, it seems like it was just a big event which is a great target for a mass shooting. It's about who has access to the guns. ", 'url': 'anonymous-source/all_shooting_images_newest/494.jpg'}, {'emotion': 'Sadness', 'intensity': '3', 'reason': 'i agree with the headline. ', 'url': 'anonymous-source/all_…
995	Mass shooting victims remembered at Thousand Oaks church service and memorial	anonymous-source/all_shooting_images_newest/110089.jpg	[{'emotion': 'Sadness', 'intensity': '4', 'reason': "Again, this is not the only time this will happen. it will keep happening, that's where my sadness comes from. ", 'url': 'anonymous-source/all_shooting_images_newest/110089.jpg'}, {'emotion': 'Sadness', 'intensity': '5', 'reason': 'i feel for the victims of this horrific event. ', 'url': 'anonymous-source/all_shooting_images_newest/110089.jpg'}…
997	Jacksonville 'Madden' shooting: Gaming community and friends pay tribute to two victims	anonymous-source/all_shooting_images_newest/139.jpg	[{'emotion': 'Contentment', 'intensity': '4', 'reason': 'This is a great place to spread ideas and commemoration in the US - sports. ', 'url': 'anonymous-source/all_shooting_images_newest/139.jpg'}, {'emotion': 'Contentment', 'intensity': '2', 'reason': "i don't know if this is the best way to pay tribute to the victims but maybe that's because I am unfamiliar with the situation. ", 'url': 'anony…
999	It s never going to be normal': California city in shock after gunman kills 12	anonymous-source/all_shooting_images_newest/110161.jpg	[{'emotion': 'Fear', 'intensity': '3', 'reason': 'Mass producing guns is to be feared, it becomes an easy access to people which is easily mis handled', 'url': 'anonymous-source/all_shooting_images_newest/110161.jpg'}, {'emotion': 'Sadness', 'intensity': '4', 'reason': 'These people were innocent, and to the gunman their lives meant nothing.', 'url': 'anonymous-source/all_shooting_images_newest/1…
1002	How 3-D printed guns are made and the growing security concerns they present	anonymous-source/all_shooting_images_newest/84.jpg	[{'emotion': 'Fear', 'intensity': '3', 'reason': 'Mass producing guns is to be feared, it becomes an easy access to people which is easily mis handled', 'url': 'anonymous-source/all_shooting_images_newest/84.jpg'}, {'emotion': 'Fear', 'intensity': '5', 'reason': 'People can make their own guns now.', 'url': 'anonymous-source/all_shooting_images_newest/84.jpg'}, {'emotion': 'Sadness', 'intensity':…
1005	Florida video game contest shooting reignites gun rights debate	anonymous-source/all_shooting_images_newest/77.jpg	[{'emotion': 'Fear', 'intensity': '3', 'reason': 'Mass producing guns is to be feared, it becomes an easy access to people which is easily mis handled', 'url': 'anonymous-source/all_shooting_images_newest/77.jpg'}, {'emotion': 'Sadness', 'intensity': '4', 'reason': 'You can get meat in the supermarket.', 'url': 'anonymous-source/all_shooting_images_newest/77.jpg'}, {'emotion': 'Sadness', 'intensi…
1019	The Latest: Vegas shooting survivors form human chain	anonymous-source/all_shooting_images_newest/100381.jpg	[{'emotion': 'Sadness', 'intensity': '5', 'reason': 'the Las Vegas shooting is sad', 'url': 'anonymous-source/all_shooting_images_newest/100381.jpg'}, {'emotion': 'Sadness', 'intensity': '3', 'reason': 'people are hugging each other and this action makes me feel mournful for the victims. ', 'url': 'anonymous-source/all_shooting_images_newest/100381.jpg'}, {'emotion': 'Sadness', 'intensity': '5', …
1022	A Black Security Guard Caught a Shooting Suspect. Police Arrived and Killed the Guard.	anonymous-source/all_shooting_images_newest/110369.jpg	[{'emotion': 'Disgust', 'intensity': '5', 'reason': 'its sad and disgusting that police assumed the Black security guard was a suspect because of his race and even sadder that they killed him', 'url': 'anonymous-source/all_shooting_images_newest/110369.jpg'}, {'emotion': 'Anger', 'intensity': '3', 'reason': "the picture doesn't add a lot to my emotion, but the incident it self makes me really ang…
1029	Shooting at Pittsburgh synagogue widely condemned, deemed 'unconscionable'	anonymous-source/all_shooting_images_newest/100416.jpg	[{'emotion': 'Sadness', 'intensity': '5', 'reason': 'its sad that there was a shooting', 'url': 'anonymous-source/all_shooting_images_newest/100416.jpg'}, {'emotion': 'Sadness', 'intensity': '4', 'reason': "pictures of women and girls crying makes me resonate. reminds me of victim's familes and i feel sorry for them.", 'url': 'anonymous-source/all_shooting_images_newest/100416.jpg'}, {'emotion': …
1032	Girlfriend: Shooter prone to violence before deadly rampage	anonymous-source/all_shooting_images_newest/110457.jpg	[{'emotion': 'Sadness', 'intensity': '5', 'reason': "it's sad that there are signs like this that are not addressed prior to shootings taking place", 'url': 'anonymous-source/all_shooting_images_newest/110457.jpg'}, {'emotion': 'Fear', 'intensity': '4', 'reason': 'the guys is taking a walk while carrying a gun. it reminds me that gun violence can happen in everyday life. for example, when i am wa…
1035	After Parkland, this survivor is fighting for gun control and against Islamophobia	anonymous-source/all_shooting_images_newest/10313.jpg	[{'emotion': 'Excitement', 'intensity': '5', 'reason': "I'm excited that these survivors of gun violence are turning to activism", 'url': 'anonymous-source/all_shooting_images_newest/10313.jpg'}, {'emotion': 'Awe', 'intensity': '2', 'reason': 'the crowd lining up looks powerful to me. i am awed by people fighting for justice.', 'url': 'anonymous-source/all_shooting_images_newest/10313.jpg'}, {'em…
1038	Meet Cody Wilson, the 'crypto-anarchist' who wants you to be able to 3D-print unregulated guns	anonymous-source/all_shooting_images_newest/130.jpg	[{'emotion': 'Fear', 'intensity': '5', 'reason': 'that man is scary, put him on a list ', 'url': 'anonymous-source/all_shooting_images_newest/130.jpg'}, {'emotion': 'Fear', 'intensity': '4', 'reason': '3d printed guns are terrifying for the accessibility and prices of them ', 'url': 'anonymous-source/all_shooting_images_newest/130.jpg'}, {'emotion': 'Fear', 'intensity': '4', 'reason': 'I am afrai…
1045	Steelers hold moment of silence for shooting victims	anonymous-source/all_shooting_images_newest/100499.jpg	[{'emotion': 'Contentment', 'intensity': '2', 'reason': 'used to these types of things ', 'url': 'anonymous-source/all_shooting_images_newest/100499.jpg'}, {'emotion': 'Sadness', 'intensity': '5', 'reason': 'it is sad because there was a shooting and it showed where it happened. ', 'url': 'anonymous-source/all_shooting_images_newest/100499.jpg'}, {'emotion': 'Sadness', 'intensity': '3', 'reason':…
1052	3D-printed guns: Judge blocks release of blueprints for firearms	anonymous-source/all_shooting_images_newest/405.jpg	[{'emotion': 'Contentment', 'intensity': '4', 'reason': 'seems like the obvious move ', 'url': 'anonymous-source/all_shooting_images_newest/405.jpg'}, {'emotion': 'Contentment', 'intensity': '4', 'reason': 'content because blueprints for 3d printed firearms are dangerous, and knowing that judges and people understand that is reassuring. ', 'url': 'anonymous-source/all_shooting_images_newest/405.j…
1054	Accused Gunman in Capital Gazette Shooting Left a Trail of Conflicts	anonymous-source/all_shooting_images_newest/10651.jpg	[{'emotion': 'Disgust', 'intensity': '4', 'reason': '`these people are mourning and have a lot to deal with ', 'url': 'anonymous-source/all_shooting_images_newest/10651.jpg'}, {'emotion': 'Sadness', 'intensity': '4', 'reason': '"a trail" of conflicts is so sad especially paired with the picture. ', 'url': 'anonymous-source/all_shooting_images_newest/10651.jpg'}, {'emotion': 'Fear', 'intensity': '…
1058	Whites don't shoot whites,' suspected gunman told man after killing 2 black customers at Kentucky Kroger	anonymous-source/all_shooting_images_newest/100186.jpg	[{'emotion': 'Excitement', 'intensity': '3', 'reason': 'Excitement', 'url': 'anonymous-source/all_shooting_images_newest/100186.jpg'}, {'emotion': 'Fear', 'intensity': '5', 'reason': 'That is terrifying, and he sound and looks insane.', 'url': 'anonymous-source/all_shooting_images_newest/100186.jpg'}, {'emotion': 'Anger', 'intensity': '5', 'reason': 'I feel extremely angry and disgusted ', 'url':…
1059	Pittsburgh synagogue shooting prompts wide outpouring of public support	anonymous-source/all_shooting_images_newest/100315.jpg	[{'emotion': 'Excitement', 'intensity': '3', 'reason': 'Excitement', 'url': 'anonymous-source/all_shooting_images_newest/100315.jpg'}, {'emotion': 'Sadness', 'intensity': '5', 'reason': 'It is extremely sad that so many people were killed in a mass shooting, especially in a synagogue.', 'url': 'anonymous-source/all_shooting_images_newest/100315.jpg'}, {'emotion': 'Awe', 'intensity': '5', 'reason'…
1060	Texas Lt. Gov. Says Too Many Entrances Possibly To Blame In School Shooting	anonymous-source/all_shooting_images_newest/10625.jpg	[{'emotion': 'Excitement', 'intensity': '3', 'reason': 'Excitement', 'url': 'anonymous-source/all_shooting_images_newest/10625.jpg'}, {'emotion': 'Disgust', 'intensity': '2', 'reason': 'He is not taking accountability or taking action to try and prevent another school shooting. It is really sad that there was a shooting. It does not sound like he is showing very much sympathy.', 'url': 'anonymous…
1064	Fair board to consider ban on gun shows at Del Mar Fairgrounds	anonymous-source/all_shooting_images_newest/90277.jpg	[{'emotion': 'Excitement', 'intensity': '3', 'reason': 'Excitement', 'url': 'anonymous-source/all_shooting_images_newest/90277.jpg'}, {'emotion': 'Contentment', 'intensity': '1', 'reason': "At least they're considering it.", 'url': 'anonymous-source/all_shooting_images_newest/90277.jpg'}, {'emotion': 'Contentment', 'intensity': '3', 'reason': 'I feel happy because safety is important ', 'url': 'a…
1068	Jury sees video of white man who greeted lost black teen with shotgun	anonymous-source/all_shooting_images_newest/100189.jpg	[{'emotion': 'Excitement', 'intensity': '3', 'reason': 'Excitement', 'url': 'anonymous-source/all_shooting_images_newest/100189.jpg'}, {'emotion': 'Fear', 'intensity': '3', 'reason': 'That is terrifying!!!', 'url': 'anonymous-source/all_shooting_images_newest/100189.jpg'}, {'emotion': 'Disgust', 'intensity': '5', 'reason': 'I feel extremely frustrated. So unfair', 'url': 'anonymous-source/all_sho…
1069	Las Vegas shooting: One year later, hundreds of videos traumatize some survivors	anonymous-source/all_shooting_images_newest/100366.jpg	[{'emotion': 'Excitement', 'intensity': '3', 'reason': 'Excitement', 'url': 'anonymous-source/all_shooting_images_newest/100366.jpg'}, {'emotion': 'Fear', 'intensity': '5', 'reason': 'Because that is terrifying that it happened and it is incredibly sad and scary to think about what everyone who was there has gone through.', 'url': 'anonymous-source/all_shooting_images_newest/100366.jpg'}, {'emoti…
1074	March For Our Lives founder leaves the gun control movement and expresses one big regret	anonymous-source/all_shooting_images_newest/90297.jpg	[{'emotion': 'Excitement', 'intensity': '3', 'reason': 'Excitement', 'url': 'anonymous-source/all_shooting_images_newest/90297.jpg'}, {'emotion': 'Sadness', 'intensity': '2', 'reason': 'What does that mean?', 'url': 'anonymous-source/all_shooting_images_newest/90297.jpg'}, {'emotion': 'Sadness', 'intensity': '4', 'reason': 'I am extremely curious and would be interested to know he left ', 'url': …
1075	House Dems call for first Education Committee hearing on school shootings since Sandy Hook	anonymous-source/all_shooting_images_newest/10222.jpg	[{'emotion': 'Excitement', 'intensity': '3', 'reason': 'Excitement', 'url': 'anonymous-source/all_shooting_images_newest/10222.jpg'}, {'emotion': 'Sadness', 'intensity': '3', 'reason': 'It is sad that that is the first hearing since Sandy Hook, but at least they are calling one.', 'url': 'anonymous-source/all_shooting_images_newest/10222.jpg'}, {'emotion': 'Excitement', 'intensity': '3', 'reason'…
1078	Mental Health Provider That Evaluated Nikolas Cruz Before Parkland Shooting To Service Florida Charter Schools	anonymous-source/all_shooting_images_newest/90131.jpg	[{'emotion': 'Sadness', 'intensity': '3', 'reason': 'he looks like a kid arrested in connection to gun violence', 'url': 'anonymous-source/all_shooting_images_newest/90131.jpg'}, {'emotion': 'Disgust', 'intensity': '3', 'reason': 'This provider has already failed once and they are still getting the opportunity to service more schools.', 'url': 'anonymous-source/all_shooting_images_newest/90131.jp…
1082	So Much Pain : A Police Family, Forever Changed by the Las Vegas Mass Shooting	anonymous-source/all_shooting_images_newest/100181.jpg	[{'emotion': 'Sadness', 'intensity': '3', 'reason': 'it is the cops who can stop gun violence in action', 'url': 'anonymous-source/all_shooting_images_newest/100181.jpg'}, {'emotion': 'Sadness', 'intensity': '3', 'reason': 'These shooting events tear open families and communities and create wounds that may never heal.', 'url': 'anonymous-source/all_shooting_images_newest/100181.jpg'}, {'emotion':…
1085	Garth Brooks opens CMA Awards with moment of silence for Thousand Oaks shooting victims	anonymous-source/all_shooting_images_newest/110240.jpg	[{'emotion': 'Awe', 'intensity': '3', 'reason': 'how is it related to gunviolence', 'url': 'anonymous-source/all_shooting_images_newest/110240.jpg'}, {'emotion': 'Contentment', 'intensity': '3', 'reason': 'This is the right thing to do.', 'url': 'anonymous-source/all_shooting_images_newest/110240.jpg'}, {'emotion': 'Awe', 'intensity': '5', 'reason': "I am extremely happy that so many different pe…
1086	New NRA President Oliver North Suggests All Iranians Are Liars	anonymous-source/all_shooting_images_newest/10647.jpg	[{'emotion': 'Contentment', 'intensity': '3', 'reason': 'a debate will always cause more awareness among people about issue at hand', 'url': 'anonymous-source/all_shooting_images_newest/10647.jpg'}, {'emotion': 'Anger', 'intensity': '4', 'reason': 'A blatantly racist and prejudiced individual such as this should not be able to reach positions of influence.', 'url': 'anonymous-source/all_shooting_…
1089	Only 5 senators were in the room to hear Parkland shooting survivor's testimony on Kavanaugh	anonymous-source/all_shooting_images_newest/90231.jpg	[{'emotion': 'Sadness', 'intensity': '3', 'reason': 'she is kid who is testifying in a gun violence case', 'url': 'anonymous-source/all_shooting_images_newest/90231.jpg'}, {'emotion': 'Sadness', 'intensity': '3', 'reason': 'It feels like the senators are actively trying to distance themselves and ignore these pressing issues that happened as a result of their lapses in judgement with policy makin…
1094	School kids use #IfIDieInASchoolShooting to share thoughts on gun violence	anonymous-source/all_shooting_images_newest/10757.jpg	[{'emotion': 'Sadness', 'intensity': '3', 'reason': "kid shouldn't have to think about losing their lives at school", 'url': 'anonymous-source/all_shooting_images_newest/10757.jpg'}, {'emotion': 'Sadness', 'intensity': '3', 'reason': 'This should never be a concern of young children. It shows there is something really wrong.', 'url': 'anonymous-source/all_shooting_images_newest/10757.jpg'}, {'emo…
1095	Hundreds gather to honor Noel Sparks, killed in Thousand Oaks mass shooting	anonymous-source/all_shooting_images_newest/110263.jpg	[{'emotion': 'Sadness', 'intensity': '3', 'reason': 'kid laying flowers for near and dear passing away in a gun violence', 'url': 'anonymous-source/all_shooting_images_newest/110263.jpg'}, {'emotion': 'Awe', 'intensity': '3', 'reason': "I don't know much about Noel Sparks but I'm interested in this person now after seeing this much done in his honor.", 'url': 'anonymous-source/all_shooting_images…
1096	NRA's Dana Loesch: Trump 'entertaining both sides' in gun debate	anonymous-source/all_shooting_images_newest/10652.jpg	[{'emotion': 'Anger', 'intensity': '3', 'reason': 'there is nothing to be happy about gun violence', 'url': 'anonymous-source/all_shooting_images_newest/10652.jpg'}, {'emotion': 'Amusement', 'intensity': '3', 'reason': "It feels like Trump has a lot of flippy arguments so this isn't strange.", 'url': 'anonymous-source/all_shooting_images_newest/10652.jpg'}, {'emotion': 'Disgust', 'intensity': '3'…
1103	These young survivors of the Parkland shooting give voice to a nation's outrage	anonymous-source/all_shooting_images_newest/10037.jpg	[{'emotion': 'Sadness', 'intensity': '3', 'reason': 'N/A', 'url': 'anonymous-source/all_shooting_images_newest/10037.jpg'}, {'emotion': 'Sadness', 'intensity': '3', 'reason': 'sad', 'url': 'anonymous-source/all_shooting_images_newest/10037.jpg'}, {'emotion': 'Fear', 'intensity': '3', 'reason': 'how young the targets of the shooting are', 'url': 'anonymous-source/all_shooting_images_newest/10037.j…
1104	Families, friends gather as more loved ones are laid to rest in wake of school shooting	anonymous-source/all_shooting_images_newest/10825.jpg	[{'emotion': 'Sadness', 'intensity': '3', 'reason': 'N/A', 'url': 'anonymous-source/all_shooting_images_newest/10825.jpg'}, {'emotion': 'Sadness', 'intensity': '3', 'reason': 'sad', 'url': 'anonymous-source/all_shooting_images_newest/10825.jpg'}, {'emotion': 'Sadness', 'intensity': '5', 'reason': 'the image. ', 'url': 'anonymous-source/all_shooting_images_newest/10825.jpg'}, {'emotion': 'Sadness'…
1110	The biggest outrage about America's gun violence is Congress' failure to do anything about it	anonymous-source/all_shooting_images_newest/10876.jpg	[{'emotion': 'Sadness', 'intensity': '3', 'reason': 'N/A', 'url': 'anonymous-source/all_shooting_images_newest/10876.jpg'}, {'emotion': 'Sadness', 'intensity': '3', 'reason': 'fear', 'url': 'anonymous-source/all_shooting_images_newest/10876.jpg'}, {'emotion': 'Sadness', 'intensity': '4', 'reason': "of the congress' behavior towards gun violence ", 'url': 'anonymous-source/all_shooting_images_newe…
1114	Kansas man sentenced to life in prison for 2017 shooting that targeted Indian men	anonymous-source/all_shooting_images_newest/22.jpg	[{'emotion': 'Sadness', 'intensity': '3', 'reason': 'N/A', 'url': 'anonymous-source/all_shooting_images_newest/22.jpg'}, {'emotion': 'Sadness', 'intensity': '3', 'reason': 'sad', 'url': 'anonymous-source/all_shooting_images_newest/22.jpg'}, {'emotion': 'Contentment', 'intensity': '5', 'reason': 'the man gets what he deserved ', 'url': 'anonymous-source/all_shooting_images_newest/22.jpg'}, {'emoti…
1115	Probe: Mercy Hospital gunman was 'disliked classmate'at fire academy, described as presenting himself in'perverted' way	anonymous-source/all_shooting_images_newest/110226.jpg	[{'emotion': 'Sadness', 'intensity': '3', 'reason': 'N/A', 'url': 'anonymous-source/all_shooting_images_newest/110226.jpg'}, {'emotion': 'Sadness', 'intensity': '3', 'reason': 'fear', 'url': 'anonymous-source/all_shooting_images_newest/110226.jpg'}, {'emotion': 'Disgust', 'intensity': '4', 'reason': 'of the words used in the tittle that made me feel that way ', 'url': 'anonymous-source/all_shooti…
1117	This Is Us pays tribute to Pittsburgh shooting victims: 'We stand with out television hometown'	anonymous-source/all_shooting_images_newest/110055.jpg	[{'emotion': 'Sadness', 'intensity': '3', 'reason': 'N/A', 'url': 'anonymous-source/all_shooting_images_newest/110055.jpg'}, {'emotion': 'Sadness', 'intensity': '3', 'reason': 'sad\r\n', 'url': 'anonymous-source/all_shooting_images_newest/110055.jpg'}, {'emotion': 'Contentment', 'intensity': '5', 'reason': 'of how they twisted a horrible topic into something that brings people together and pay tr…
1119	Family of youngest bar massacre victim: 'It's not about gun control'	anonymous-source/all_shooting_images_newest/110199.jpg	[{'emotion': 'Fear', 'intensity': '3', 'reason': 'of the image', 'url': 'anonymous-source/all_shooting_images_newest/110199.jpg'}, {'emotion': 'Sadness', 'intensity': '4', 'reason': 'I know for sure now that the woman in the picture was a victim of a shooting.', 'url': 'anonymous-source/all_shooting_images_newest/110199.jpg'}, {'emotion': 'Sadness', 'intensity': '4', 'reason': 'poor girl', 'url':…
1128	Black man's death: Questions remain in Alabama mall shooting	anonymous-source/all_shooting_images_newest/110233.jpg	[{'emotion': 'Sadness', 'intensity': '5', 'reason': 'this is a great image of the victim and will draw readers in.', 'url': 'anonymous-source/all_shooting_images_newest/110233.jpg'}, {'emotion': 'Sadness', 'intensity': '5', 'reason': 'The case appears to not be fully closed since "questions remain", which makes me sad that the victim in the image was attacked and killed in such a way.', 'url': 'a…
1132	Hearing scheduled as gun-rights advocacy groups look to overturn Deerfield assault weapons ban	anonymous-source/all_shooting_images_newest/100248.jpg	[{'emotion': 'Sadness', 'intensity': '4', 'reason': 'I do not know the context.', 'url': 'anonymous-source/all_shooting_images_newest/100248.jpg'}, {'emotion': 'Anger', 'intensity': '3', 'reason': "I don't understand why this group would want less gun restrictions, especially with all the violence occurring in recent years.", 'url': 'anonymous-source/all_shooting_images_newest/100248.jpg'}, {'emo…
1135	Publix Suspends Contributions To NRA-Backed Politician Amid Protests	anonymous-source/all_shooting_images_newest/10101.jpg	[{'emotion': 'Contentment', 'intensity': '4', 'reason': 'I like Publix.', 'url': 'anonymous-source/all_shooting_images_newest/10101.jpg'}, {'emotion': 'Contentment', 'intensity': '3', 'reason': 'knowing the context, I originally thought it was about a shooting that occurred in a Publix.', 'url': 'anonymous-source/all_shooting_images_newest/10101.jpg'}, {'emotion': 'Awe', 'intensity': '4', 'reason…
1138	On Capitol Hill, little chance of a legislative response to latest mass shooting	anonymous-source/all_shooting_images_newest/10174.jpg	[{'emotion': 'Sadness', 'intensity': '4', 'reason': 'this makes me sad and upset to hear that there was little response to the latest mass shooting. ', 'url': 'anonymous-source/all_shooting_images_newest/10174.jpg'}, {'emotion': 'Sadness', 'intensity': '3', 'reason': "the congress's authority could be challenged.", 'url': 'anonymous-source/all_shooting_images_newest/10174.jpg'}, {'emotion': 'Ange…
1141	Students across America plan school walkout in support of second amendment	anonymous-source/all_shooting_images_newest/10639.jpg	[{'emotion': 'Fear', 'intensity': '4', 'reason': 'why do students feel so strongly about obtaining a gun. ', 'url': 'anonymous-source/all_shooting_images_newest/10639.jpg'}, {'emotion': 'Fear', 'intensity': '3', 'reason': 'I felt impacted by so many guns in the picture and students should do something to stop it to protect themselves.', 'url': 'anonymous-source/all_shooting_images_newest/10639.jp…
1143	Pittsburgh synagogue shooting: how conspiracy theory politics emboldens anti-Semitism	anonymous-source/all_shooting_images_newest/100014.jpg	[{'emotion': 'Sadness', 'intensity': '4', 'reason': 'this is upsetting to hear ', 'url': 'anonymous-source/all_shooting_images_newest/100014.jpg'}, {'emotion': 'Sadness', 'intensity': '3', 'reason': 'the white flower shows that people mourn for those victims.', 'url': 'anonymous-source/all_shooting_images_newest/100014.jpg'}, {'emotion': 'Fear', 'intensity': '5', 'reason': "I'm Jewish and this sh…
1151	Remington to file for bankruptcy amid declining gun sales	anonymous-source/all_shooting_images_newest/10764.jpg	[{'emotion': 'Fear', 'intensity': '4', 'reason': 'if gun sales go down it makes me scared as more people will want to go and purchase guns since the price of them are lower than normal. ', 'url': 'anonymous-source/all_shooting_images_newest/10764.jpg'}, {'emotion': 'Contentment', 'intensity': '3', 'reason': 'with decreasing people could have gun, the gun shop also should decrease', 'url': 'anonym…
1153	The Las Vegas Strip Will Go Dark to Honor the Victims of Last Year's Mass Shooting	anonymous-source/all_shooting_images_newest/100021.jpg	[{'emotion': 'Sadness', 'intensity': '4', 'reason': 'this is a very sad moment, but also a very nice moment as we get to recognize that people who lost their lives in this mass shooting. ', 'url': 'anonymous-source/all_shooting_images_newest/100021.jpg'}, {'emotion': 'Contentment', 'intensity': '3', 'reason': 'the picture helps the headline a lot that shows people what the closed area looks like.…
1158	Delaware lawmakers pass Beau Biden Gun Violence Protection Act	anonymous-source/all_shooting_images_newest/10018.jpg	[{'emotion': 'Contentment', 'intensity': '4', 'reason': 'Things are turning better. We can see the efforts of the people.', 'url': 'anonymous-source/all_shooting_images_newest/10018.jpg'}, {'emotion': 'Contentment', 'intensity': '2', 'reason': 'Delaware passed a gun violence protection act.', 'url': 'anonymous-source/all_shooting_images_newest/10018.jpg'}, {'emotion': 'Excitement', 'intensity': '…
1159	New York passes bill to restrict guns for domestic abusers	anonymous-source/all_shooting_images_newest/10813.jpg	[{'emotion': 'Excitement', 'intensity': '4', 'reason': 'We can see hope.', 'url': 'anonymous-source/all_shooting_images_newest/10813.jpg'}, {'emotion': 'Contentment', 'intensity': '4', 'reason': 'a law restricting gun ownership for domestic abusers is an obvious step in the right direction.', 'url': 'anonymous-source/all_shooting_images_newest/10813.jpg'}, {'emotion': 'Contentment', 'intensity': …
1162	Parkland parents pushing politicians to address gun violence	anonymous-source/all_shooting_images_newest/239.jpg	[{'emotion': 'Contentment', 'intensity': '4', 'reason': 'They chose to stand up and fight against gun violence.', 'url': 'anonymous-source/all_shooting_images_newest/239.jpg'}, {'emotion': 'Sadness', 'intensity': '2', 'reason': "I'm unsure about whether these Parkland protests had much influence on politicians.", 'url': 'anonymous-source/all_shooting_images_newest/239.jpg'}, {'emotion': 'Sadness'…
1163	Texas Church Shooter Was Ticking Time Bomb	anonymous-source/all_shooting_images_newest/10267.jpg	[{'emotion': 'Fear', 'intensity': '4', 'reason': 'This is a premeditated case.', 'url': 'anonymous-source/all_shooting_images_newest/10267.jpg'}, {'emotion': 'Fear', 'intensity': '4', 'reason': 'the headline present the imagery of shooters being "ticking time bombs."', 'url': 'anonymous-source/all_shooting_images_newest/10267.jpg'}, {'emotion': 'Sadness', 'intensity': '4', 'reason': 'the time bom…
1164	Trump calls for death penalty after synagogue shooting; leaders react to tragedy with sorrow, anger and frustration	anonymous-source/all_shooting_images_newest/100205.jpg	[{'emotion': 'Contentment', 'intensity': '4', 'reason': 'Trump did the right thing.', 'url': 'anonymous-source/all_shooting_images_newest/100205.jpg'}, {'emotion': 'Disgust', 'intensity': '3', 'reason': "the death penalty is an incredibly grave punishment, and it's concerning that the former president called for it.", 'url': 'anonymous-source/all_shooting_images_newest/100205.jpg'}, {'emotion': '…
1167	California Bar Shooter Was a Veteran Who May Have Had PTSD	anonymous-source/all_shooting_images_newest/110510.jpg	[{'emotion': 'Sadness', 'intensity': '4', 'reason': "We should pay attention to veterans' psychological health.", 'url': 'anonymous-source/all_shooting_images_newest/110510.jpg'}, {'emotion': 'Sadness', 'intensity': '4', 'reason': 'there has to be more resources for veterans to support them.', 'url': 'anonymous-source/all_shooting_images_newest/110510.jpg'}, {'emotion': 'Anger', 'intensity': '3',…
1168	Romney open to new gun measures	anonymous-source/all_shooting_images_newest/10019.jpg	[{'emotion': 'Awe', 'intensity': '4', 'reason': 'We need a staunch leader.', 'url': 'anonymous-source/all_shooting_images_newest/10019.jpg'}, {'emotion': 'Awe', 'intensity': '2', 'reason': 'Romney, a Republican, is open to the idea of stricter gun control laws.', 'url': 'anonymous-source/all_shooting_images_newest/10019.jpg'}, {'emotion': 'Contentment', 'intensity': '1', 'reason': '"open to" is t…
1170	Live: Trump visits Pittsburgh after synagogue shooting	anonymous-source/all_shooting_images_newest/100250.jpg	[{'emotion': 'Contentment', 'intensity': '4', 'reason': 'Trump did a great job during this.', 'url': 'anonymous-source/all_shooting_images_newest/100250.jpg'}, {'emotion': 'Amusement', 'intensity': '1', 'reason': "I wonder how much of his visit was of Trump's own desire and how much of it was pushed for by his team.", 'url': 'anonymous-source/all_shooting_images_newest/100250.jpg'}, {'emotion': '…
1174	At Butler High School in N.C., Bullying Led to Fatal Shooting of Student, Police Say	anonymous-source/all_shooting_images_newest/100220.jpg	[{'emotion': 'Fear', 'intensity': '4', 'reason': 'School should be a safe place for us.', 'url': 'anonymous-source/all_shooting_images_newest/100220.jpg'}, {'emotion': 'Sadness', 'intensity': '3', 'reason': 'of how bullying can lead to such a great degree of violence.', 'url': 'anonymous-source/all_shooting_images_newest/100220.jpg'}, {'emotion': 'Anger', 'intensity': '4', 'reason': 'the school c…
1176	Federal Grand Jury Charges Pittsburgh Synagogue Shooter With Federal Hate Crimes	anonymous-source/all_shooting_images_newest/100335.jpg	[{'emotion': 'Contentment', 'intensity': '4', 'reason': 'The criminal should never be forgiven.', 'url': 'anonymous-source/all_shooting_images_newest/100335.jpg'}, {'emotion': 'Sadness', 'intensity': '1', 'reason': 'there is a mention of a synagogue shooting in the headline, which is sad to ponder.', 'url': 'anonymous-source/all_shooting_images_newest/100335.jpg'}, {'emotion': 'Contentment', 'int…
1184	Tragedy of grand scale': Victims remembered 1 year after Vegas shooting	anonymous-source/all_shooting_images_newest/100256.jpg	[{'emotion': 'Sadness', 'intensity': '3', 'reason': 'all these people died', 'url': 'anonymous-source/all_shooting_images_newest/100256.jpg'}, {'emotion': 'Sadness', 'intensity': '4', 'reason': 'lots of grief in this photo with the number of deaths ', 'url': 'anonymous-source/all_shooting_images_newest/100256.jpg'}, {'emotion': 'Sadness', 'intensity': '5', 'reason': 'i feel really sorry to them b…
1188	Shotgun-toting Manchin shoots anti-Obamacare lawsuit in new ad for re-election bid in West Virginia	anonymous-source/all_shooting_images_newest/90048.jpg	[{'emotion': 'Anger', 'intensity': '3', 'reason': 'this politician could be doing more', 'url': 'anonymous-source/all_shooting_images_newest/90048.jpg'}, {'emotion': 'Disgust', 'intensity': '4', 'reason': 'does thsi actually work? ', 'url': 'anonymous-source/all_shooting_images_newest/90048.jpg'}, {'emotion': 'Disgust', 'intensity': '5', 'reason': "i don't think that when relating to gun violence…
1191	Donald Trump Jr. and Kimberly Guilfoyle flaunt gun photos from Montana trip	anonymous-source/all_shooting_images_newest/110451.jpg	[{'emotion': 'Anger', 'intensity': '3', 'reason': 'why are they flaunting guns', 'url': 'anonymous-source/all_shooting_images_newest/110451.jpg'}, {'emotion': 'Anger', 'intensity': '4', 'reason': 'these people make me angry ', 'url': 'anonymous-source/all_shooting_images_newest/110451.jpg'}, {'emotion': 'Anger', 'intensity': '5', 'reason': 'i totally could not understand why people are happy abou…
1203	Garden provides place to mourn Las Vegas shooting victims	anonymous-source/all_shooting_images_newest/90343.jpg	[{'emotion': 'Contentment', 'intensity': '3', 'reason': 'Because of the information provided by the title', 'url': 'anonymous-source/all_shooting_images_newest/90343.jpg'}, {'emotion': 'Sadness', 'intensity': '3', 'reason': 'really really sad', 'url': 'anonymous-source/all_shooting_images_newest/90343.jpg'}, {'emotion': 'Awe', 'intensity': '3', 'reason': "This is really a sweet thing to do, it's …
1213	Faces Not Forgotten' honors young victims of gun violence in America	anonymous-source/all_shooting_images_newest/90387.jpg	[{'emotion': 'Awe', 'intensity': '1', 'reason': 'N/A', 'url': 'anonymous-source/all_shooting_images_newest/90387.jpg'}, {'emotion': 'Sadness', 'intensity': '3', 'reason': 'they could be alive', 'url': 'anonymous-source/all_shooting_images_newest/90387.jpg'}, {'emotion': 'Sadness', 'intensity': '4', 'reason': "The lives lost to gun violence are growing exponentially, and while the country realizes…
1214	Today's talker: Could 'mistreatment' of shooter justify Santa Fe killings?	anonymous-source/all_shooting_images_newest/10629.jpg	[{'emotion': 'Awe', 'intensity': '1', 'reason': 'N/A', 'url': 'anonymous-source/all_shooting_images_newest/10629.jpg'}, {'emotion': 'Disgust', 'intensity': '3', 'reason': 'just ban the guns', 'url': 'anonymous-source/all_shooting_images_newest/10629.jpg'}, {'emotion': 'Anger', 'intensity': '5', 'reason': "Gun violence is not excused in any way shape or form. However, the argument to defend a shoo…
1215	Paul McCartney attends 'March For Our Lives': I lost my best friend to gun violence	anonymous-source/all_shooting_images_newest/10397.jpg	[{'emotion': 'Awe', 'intensity': '1', 'reason': 'N/A', 'url': 'anonymous-source/all_shooting_images_newest/10397.jpg'}, {'emotion': 'Sadness', 'intensity': '3', 'reason': "can't imagine if this happens to me", 'url': 'anonymous-source/all_shooting_images_newest/10397.jpg'}, {'emotion': 'Sadness', 'intensity': '2', 'reason': "I respect people with a platform when they speak up about what's going o…
1218	Commentary: This is how common school shootings are in America	anonymous-source/all_shooting_images_newest/110476.jpg	[{'emotion': 'Sadness', 'intensity': '4', 'reason': 'I cannot understand why the government cannot protect the students, who are the future of the country', 'url': 'anonymous-source/all_shooting_images_newest/110476.jpg'}, {'emotion': 'Fear', 'intensity': '5', 'reason': 'School shootings are too common. ', 'url': 'anonymous-source/all_shooting_images_newest/110476.jpg'}, {'emotion': 'Sadness', 'i…
1219	These Florida lawmakers accepted money from the National Rifle Association	anonymous-source/all_shooting_images_newest/10776.jpg	[{'emotion': 'Disgust', 'intensity': '3', 'reason': 'The National Rifle Association gained money from those who bought guns. The money might be tainted with blood！', 'url': 'anonymous-source/all_shooting_images_newest/10776.jpg'}, {'emotion': 'Disgust', 'intensity': '5', 'reason': 'People are accepting money from corporations that promote killings indirectly/directly', 'url': 'anonymous-source/al…
1226	Jaime Lee Curtis on Fox News criticism of her using weapons in a movie, despite advocating for gun control: 'It was just silly'	anonymous-source/all_shooting_images_newest/100200.jpg	[{'emotion': 'Amusement', 'intensity': '3', 'reason': 'Banning use of weapons in movies is unnecessary. What should really be of concern are the laws regarding guns in the real word.', 'url': 'anonymous-source/all_shooting_images_newest/100200.jpg'}, {'emotion': 'Awe', 'intensity': '3', 'reason': "I don't think that movies have a strong impact on violence. I would need to do more research though …
1228	Who is Jemel Roberson? Black Security Guard Shot Dead By Police After Subduing and Disarming Gunman	anonymous-source/all_shooting_images_newest/110516.jpg	[{'emotion': 'Anger', 'intensity': '4', 'reason': 'This policeman was so bad because he was involved in both gun shooting and discrimination.', 'url': 'anonymous-source/all_shooting_images_newest/110516.jpg'}, {'emotion': 'Anger', 'intensity': '4', 'reason': "This will sadly keep happening that's what makes me happy more than an innocent life being taken. This will happen to more innocent people,…
1230	We Have the Right to Bear Arms': Kanye Talks Guns, Chicago Violence With Trump	anonymous-source/all_shooting_images_newest/100137.jpg	[{'emotion': 'Anger', 'intensity': '3', 'reason': 'They are so selfish and irresponsible. ', 'url': 'anonymous-source/all_shooting_images_newest/100137.jpg'}, {'emotion': 'Disgust', 'intensity': '4', 'reason': "Kanye has such a big platform and the fact that he's associating himself with trump only boosts those hypocritical views further and brings trump more popularity. ", 'url': 'anonymous-sour…
1231	Amazon bans the sale of a guidebook for 3D printing a gun	anonymous-source/all_shooting_images_newest/182.jpg	[{'emotion': 'Contentment', 'intensity': '3', 'reason': "I can feel Amazon's consideration for security risks.", 'url': 'anonymous-source/all_shooting_images_newest/182.jpg'}, {'emotion': 'Contentment', 'intensity': '4', 'reason': "Amazon has a huge impact and I'm glad they're taking action to stop the spread of guns. ", 'url': 'anonymous-source/all_shooting_images_newest/182.jpg'}, {'emotion': '…
1232	November 7 1:04 PM Washington voters approve tough gun control measures	anonymous-source/all_shooting_images_newest/110276.jpg	[{'emotion': 'Contentment', 'intensity': '4', 'reason': 'This approach is responsible and protective of the public.', 'url': 'anonymous-source/all_shooting_images_newest/110276.jpg'}, {'emotion': 'Contentment', 'intensity': '4', 'reason': "I'm glad that people are taking action and that we can see it happening. ", 'url': 'anonymous-source/all_shooting_images_newest/110276.jpg'}, {'emotion': 'Cont…
1233	After Santa Fe School Shooting, Texas Town Grapples With Bullying	anonymous-source/all_shooting_images_newest/10053.jpg	[{'emotion': 'Contentment', 'intensity': '3', 'reason': 'Schools should really teach students how to protect themselves.', 'url': 'anonymous-source/all_shooting_images_newest/10053.jpg'}, {'emotion': 'Awe', 'intensity': '3', 'reason': 'What kind of bullying? I need more context', 'url': 'anonymous-source/all_shooting_images_newest/10053.jpg'}, {'emotion': 'Sadness', 'intensity': '4', 'reason': "I…
1243	The Latest: Shooting survivors focus anger at Trump, tweets	anonymous-source/all_shooting_images_newest/10116.jpg	[{'emotion': 'Sadness', 'intensity': '4', 'reason': 'I feel sad that someone has been killed because of gun violence and the teddy bear gives me the impression that people are paying their respects to the victim. ', 'url': 'anonymous-source/all_shooting_images_newest/10116.jpg'}, {'emotion': 'Anger', 'intensity': '5', 'reason': 'I also focus anger at trump and its sad that so many people are expo…
1244	Wisconsin and Maryland shooters both had history of mental illness	anonymous-source/all_shooting_images_newest/90244.jpg	[{'emotion': 'Anger', 'intensity': '2', 'reason': 'Guns should not be handed by people who had mental illnesses. It must be because of the negligence of authority, that such people are carrying guns and are causing gun violence.', 'url': 'anonymous-source/all_shooting_images_newest/90244.jpg'}, {'emotion': 'Fear', 'intensity': '5', 'reason': 'It makes me scared and upset that people who have ment…
1245	Wells Fargo gives gun maker a new line of credit, unswayed by nuns' opposition	anonymous-source/all_shooting_images_newest/100043.jpg	[{'emotion': 'Anger', 'intensity': '4', 'reason': 'The policies of such corporations usually propel the manufacture of guns which indirectly increases its usage. This would ultimately lead to more gun violence. ', 'url': 'anonymous-source/all_shooting_images_newest/100043.jpg'}, {'emotion': 'Anger', 'intensity': '5', 'reason': 'wells fargo is supporting gun makers', 'url': 'anonymous-source/all_s…
1247	Pittsburgh synagogue shooting suspect Robert Bowers pleads not guilty to federal hate crime charges	anonymous-source/all_shooting_images_newest/110396.jpg	[{'emotion': 'Anger', 'intensity': '2', 'reason': 'Either the person is guilty and pleading not guilty which would mean he is trying to escape or the person is not guilty and the real killer is out in the open. Both situations are scary and make me angry with the authorities. ', 'url': 'anonymous-source/all_shooting_images_newest/110396.jpg'}, {'emotion': 'Disgust', 'intensity': '5', 'reason': "t…
1248	Bernie Sanders lashes out at Congress over gun control after Santa Fe, Texas, shooting	anonymous-source/all_shooting_images_newest/10008.jpg	[{'emotion': 'Excitement', 'intensity': '2', 'reason': 'A senator is finally speaking upon the issue of gun violence. ', 'url': 'anonymous-source/all_shooting_images_newest/10008.jpg'}, {'emotion': 'Contentment', 'intensity': '4', 'reason': "i'm glad sanders is promoting gun control", 'url': 'anonymous-source/all_shooting_images_newest/10008.jpg'}, {'emotion': 'Contentment', 'intensity': '3', 're…
1250	Trump Calls for Unity After Synagogue Shooting, Then Swiftly Denounces Democrats	anonymous-source/all_shooting_images_newest/100198.jpg	[{'emotion': 'Sadness', 'intensity': '2', 'reason': 'Someone has been a victim of gun violence and the president had to speak up on the issue and calm the people down who are disgruntled with the authorities. ', 'url': 'anonymous-source/all_shooting_images_newest/100198.jpg'}, {'emotion': 'Anger', 'intensity': '5', 'reason': 'the fact that he called for unity then immediately used divisive langua…
1251	Shopify bans sales of some guns, weapons and ammunition	anonymous-source/all_shooting_images_newest/240.jpg	[{'emotion': 'Contentment', 'intensity': '3', 'reason': 'Corporations are finally speaking up on the issue of gun violence and are taking proactive measures.', 'url': 'anonymous-source/all_shooting_images_newest/240.jpg'}, {'emotion': 'Contentment', 'intensity': '2', 'reason': "I'm glad shopify banned the sale of guns", 'url': 'anonymous-source/all_shooting_images_newest/240.jpg'}, {'emotion': 'A…
1255	FedEx to end program that offers discounts for business members of NRA	anonymous-source/all_shooting_images_newest/100280.jpg	[{'emotion': 'Contentment', 'intensity': '2', 'reason': 'finally corporations are speaking up on the issue of gun violence and are pointing to it. But the measures taken by them is not enough and more measures are to be taken. ', 'url': 'anonymous-source/all_shooting_images_newest/100280.jpg'}, {'emotion': 'Contentment', 'intensity': '3', 'reason': "I'm happy that fedex is ending this but why was…
1264	3D-printed activist' honors student from Parkland shooting in Times Square	anonymous-source/all_shooting_images_newest/100375.jpg	[{'emotion': 'Excitement', 'intensity': '3', 'reason': 'A lot of strong colors and art', 'url': 'anonymous-source/all_shooting_images_newest/100375.jpg'}, {'emotion': 'Sadness', 'intensity': '4', 'reason': 'The statue to honor the fallen Parkland student is wonderful. I am sad because the death of all school shootings could have been prevented with stricter gun control. ', 'url': 'anonymous-sourc…
1272	Someone could potentially get shot': Police warn people against buying gun-shaped phone case	anonymous-source/all_shooting_images_newest/100244.jpg	[{'emotion': 'Amusement', 'intensity': '3', 'reason': 'The headline is funny and the image is funny as well', 'url': 'anonymous-source/all_shooting_images_newest/100244.jpg'}, {'emotion': 'Disgust', 'intensity': '2', 'reason': 'I am confused by this headline because this product is entirely dumb and why would they buy it. ', 'url': 'anonymous-source/all_shooting_images_newest/100244.jpg'}, {'emot…
1274	Gunman targeting Jews kills 11 in Pittsburgh synagogue	anonymous-source/all_shooting_images_newest/100379.jpg	[{'emotion': 'Sadness', 'intensity': '5', 'reason': 'death involved and people crying in the image', 'url': 'anonymous-source/all_shooting_images_newest/100379.jpg'}, {'emotion': 'Anger', 'intensity': '5', 'reason': 'Guns are weapons of extreme violence and have the potential to hurt so many. There is no use for civilians to have automatic weapons to kill others and their disposal. It angers me t…
1276	'Alarming' rise in eye injuries from BB, pellet and paintball guns in kids	anonymous-source/all_shooting_images_newest/10781.jpg	[{'emotion': 'Fear', 'intensity': '3', 'reason': 'headlines involves kids injury ', 'url': 'anonymous-source/all_shooting_images_newest/10781.jpg'}, {'emotion': 'Sadness', 'intensity': '4', 'reason': 'Children should not have access to these violent weapons. Violent weapons are causing problems and are dangerous. ', 'url': 'anonymous-source/all_shooting_images_newest/10781.jpg'}, {'emotion': 'Fea…
1283	A Community Response to Mass Shooting Forum and Discussion	anonymous-source/all_shooting_images_newest/10663.jpg	[{'emotion': 'Sadness', 'intensity': '2', 'reason': 'Mass shootings are sad.', 'url': 'anonymous-source/all_shooting_images_newest/10663.jpg'}, {'emotion': 'Sadness', 'intensity': '4', 'reason': 'These types of memorials should never happen', 'url': 'anonymous-source/all_shooting_images_newest/10663.jpg'}, {'emotion': 'Awe', 'intensity': '4', 'reason': 'people are supporting those who died from t…
1288	Trump applauds NRA leaders, Kanye West in speech	anonymous-source/all_shooting_images_newest/10058.jpg	[{'emotion': 'Amusement', 'intensity': '4', 'reason': 'I find it amusing that Kanye West is in this headline.', 'url': 'anonymous-source/all_shooting_images_newest/10058.jpg'}, {'emotion': 'Disgust', 'intensity': '5', 'reason': "The man is disgusting and so is the NRA; why include Kanye in this headline, it's pure clickbait", 'url': 'anonymous-source/all_shooting_images_newest/10058.jpg'}, {'emot…
1293	Trump's silence on Waffle House shooting speaks volumes	anonymous-source/all_shooting_images_newest/10706.jpg	[{'emotion': 'Sadness', 'intensity': '2', 'reason': 'He should say something about a national tragedy.', 'url': 'anonymous-source/all_shooting_images_newest/10706.jpg'}, {'emotion': 'Disgust', 'intensity': '4', 'reason': "Stop giving Trump a platform, especially when he didn't even say anything", 'url': 'anonymous-source/all_shooting_images_newest/10706.jpg'}, {'emotion': 'Sadness', 'intensity': …
1294	I don t want prayers ... I want gun control, demands mom of Thousand Oaks mass shooting victim ABC News	anonymous-source/all_shooting_images_newest/110098.jpg	[{'emotion': 'Disgust', 'intensity': '2', 'reason': 'I do not like her tone.', 'url': 'anonymous-source/all_shooting_images_newest/110098.jpg'}, {'emotion': 'Anger', 'intensity': '4', 'reason': 'This is a really bad image to use due to the Neo-Nazi tattoo on the man in the back', 'url': 'anonymous-source/all_shooting_images_newest/110098.jpg'}, {'emotion': 'Sadness', 'intensity': '4', 'reason': '…
1296	Democrats Plan to Pursue Aggressive Gun-Control Legislation	anonymous-source/all_shooting_images_newest/110031.jpg	[{'emotion': 'Fear', 'intensity': '2', 'reason': 'Aggressive is a strong word.', 'url': 'anonymous-source/all_shooting_images_newest/110031.jpg'}, {'emotion': 'Excitement', 'intensity': '3', 'reason': "It sounds promising, but they've done essentially nothing so far so I'm dubious", 'url': 'anonymous-source/all_shooting_images_newest/110031.jpg'}, {'emotion': 'Excitement', 'intensity': '4', 'reas…
