# Supplementary material
Source: ML conference proceedings conference paper supplement (https://aclanthology.org/2022.aacl-main.29)
Supplement: Dataset [file 2022.aacl-main.29.Dataset.zip › NEmoP/NEmoP-Consensus/NEmoP-CR/NEmoP-CR-I.csv]

	Headline	url	image_responses
4	No safe haven as shootings rock US schools	anonymous-source/all_shooting_images_newest/10827.jpg	[{'emotion': 'Sadness', 'intensity': '2', 'reason': 'Shooting probably already happened, policeman are coming to clear the mess.'}, {'emotion': 'Sadness', 'intensity': '4', 'reason': 'knowing there are school shootings that happen frequently, seeing something like this would definitely make me sad'}, {'emotion': 'Anger', 'intensity': '3', 'reason': 'This reminds me of the Rancho Tehama school sho…
7	Pittsburgh synagogue shooting: Portraits of the 11 victims	anonymous-source/all_shooting_images_newest/100385.jpg	[{'emotion': 'Sadness', 'intensity': '3', 'reason': 'Innocent people have been murdered by gun violence.'}, {'emotion': 'Sadness', 'intensity': '4', 'reason': 'looks like these people went through a terrible loss of someone close because of gun violence '}, {'emotion': 'Sadness', 'intensity': '4', 'reason': 'this makes me think of the victims of gun violence'}, {'emotion': 'Sadness', 'intensity':…
8	Adult, juvenile charged in BB gun incident that prompted Elgin school to go into 'secure' mode	anonymous-source/all_shooting_images_newest/413.jpg	[{'emotion': 'Fear', 'intensity': '3', 'reason': 'What if innocent children have been related to the gun violence.'}, {'emotion': 'Sadness', 'intensity': '3', 'reason': "schools being a common target of gun violence is one of the most saddening truths of today's era "}, {'emotion': 'Fear', 'intensity': '1', 'reason': "I don't know that happened at this school but I fear that it is another school …
11	U.S. Needs Tougher Gun Laws to Stop Dementia Patients Killing Themselves and Others, Scientists Warn	anonymous-source/all_shooting_images_newest/110045.jpg	[{'emotion': 'Fear', 'intensity': '3', 'reason': 'Fear that what of the gun is pointing at me.'}, {'emotion': 'Contentment', 'intensity': '3', 'reason': 'dont know the context of this picture'}, {'emotion': 'Fear', 'intensity': '3', 'reason': "I'm anxious because it's a white guy holding a gun. almost all mass shootings are involved with a white guy killing people. "}, {'emotion': 'Fear', 'intens…
12	Trump urges lawmakers to buck NRA every once in a while	anonymous-source/all_shooting_images_newest/10336.jpg	[{'emotion': 'Anger', 'intensity': '4', 'reason': 'Politicians do not care about the gun control.'}, {'emotion': 'Disgust', 'intensity': '3', 'reason': "Donald Trump shouldn't be allowed to speak to public and it's disgusting to see him have an opinion on gun control"}, {'emotion': 'Anger', 'intensity': '3', 'reason': 'looking at donald trump always reminds me of how he framed the covid and chine…
14	The shooting at a Madden video game tournament in Florida has shaken esports gamers and leagues in the fast-growing industry	anonymous-source/all_shooting_images_newest/12.jpg	[{'emotion': 'Fear', 'intensity': '4', 'reason': 'Feeling uneasy about the gun violence.'}, {'emotion': 'Contentment', 'intensity': '3', 'reason': "I think i'll be fine in the presence of police officers being armed in public like this"}, {'emotion': 'Fear', 'intensity': '3', 'reason': "I feel sad when there's police being in an area where there's no one there, I can only assume that something ba…
16	Hundreds of Malibu students and their families march against gun violence, call for stricter gun control laws	anonymous-source/all_shooting_images_newest/10475.jpg	[{'emotion': 'Sadness', 'intensity': '2', 'reason': 'It makes me feel the aftermath of gun violence.'}, {'emotion': 'Sadness', 'intensity': '3', 'reason': "no one shouldn't have to go through this kind of pain"}, {'emotion': 'Sadness', 'intensity': '3', 'reason': "I'm sad because this is supposed to appear in places like government offices, instead of on the walls that no policymakers will see or…
17	Pittsburgh shooting: US Muslim groups raise more than $110,000 for synagogue attack victims	anonymous-source/all_shooting_images_newest/100398.jpg	[{'emotion': 'Sadness', 'intensity': '2', 'reason': 'It makes me feel the aftermath of gun violence.'}, {'emotion': 'Sadness', 'intensity': '3', 'reason': "This looks really awful and no one shouldn't have to go through this pain"}, {'emotion': 'Sadness', 'intensity': '3', 'reason': 'I feel sad when people die, but at the same time, how people care about and remember the passed makes me less sad'…
20	North Carolina high school shooting stemmed from bullying that escalated out of control, officials say	anonymous-source/all_shooting_images_newest/100479.jpg	[{'emotion': 'Sadness', 'intensity': '3', 'reason': 'Sadness'}, {'emotion': 'Sadness', 'intensity': '3', 'reason': 'It is sad that young kids get their hands on guns.'}, {'emotion': 'Anger', 'intensity': '2', 'reason': "While I don't know if this person's apparent arrest is lawful or not, I am still reminded of the treatment of Black people by the US police system and the association people tend …
27	Chicago police chief calls 58 shootings in 3 days 'tragic, senseless and cowardly'	anonymous-source/all_shooting_images_newest/259.jpg	[{'emotion': 'Fear', 'intensity': '3', 'reason': 'Fear'}, {'emotion': 'Fear', 'intensity': '3', 'reason': 'I hope that everyone at that subway was safe and I am scared that there was a shooting there.'}, {'emotion': 'Anger', 'intensity': '2', 'reason': "While I don't fully know the context of the picture, I imagine the police officer is acting inappropriately at the scene of a crime"}, {'emotion'…
32	SNL,' with Alec Baldwin as Trump, addresses gun control after Parkland school shooting	anonymous-source/all_shooting_images_newest/10734.jpg	[{'emotion': 'Amusement', 'intensity': '3', 'reason': 'Amusement'}, {'emotion': 'Amusement', 'intensity': '3', 'reason': 'SNL can be funny sometimes.'}, {'emotion': 'Disgust', 'intensity': '2', 'reason': "I don't generally find parodies of these political figures funny."}, {'emotion': 'Amusement', 'intensity': '5', 'reason': 'I am happy because people are highlighting the absurdness of presidents…
36	Gun Control Groups Eclipse N.R.A. in Election Spending	anonymous-source/all_shooting_images_newest/110462.jpg	[{'emotion': 'Sadness', 'intensity': '3', 'reason': 'Sadness\r\n'}, {'emotion': 'Excitement', 'intensity': '3', 'reason': 'Hopefully we will have more gun safety laws.'}, {'emotion': 'Contentment', 'intensity': '4', 'reason': 'I am always glad to see members of different generations fighting for stricter gun laws.'}, {'emotion': 'Excitement', 'intensity': '4', 'reason': 'I feel joy that of people…
38	Pro-gun Georgia lawmakers punish Delta for crossing the NRA	anonymous-source/all_shooting_images_newest/10722.jpg	[{'emotion': 'Anger', 'intensity': '3', 'reason': 'Anger'}, {'emotion': 'Anger', 'intensity': '3', 'reason': 'Pro-gun lawmakers should not be punishing delta.'}, {'emotion': 'Amusement', 'intensity': '3', 'reason': "I think it's somewhat funny that the Pro-gun lawmakers were no happy with this."}, {'emotion': 'Anger', 'intensity': '4', 'reason': 'I feel anger at people that use their influence to…
39	Township objects to proposed new rules for Kendall County shooting ranges	anonymous-source/all_shooting_images_newest/100165.jpg	[{'emotion': 'Contentment', 'intensity': '3', 'reason': 'Contentment\r\n'}, {'emotion': 'Fear', 'intensity': '3', 'reason': 'I hope they are fighting for gun safety but I fear they are not.'}, {'emotion': 'Contentment', 'intensity': '1', 'reason': 'I do not know the context of the image'}, {'emotion': 'Sadness', 'intensity': '4', 'reason': 'I feel sad about people that do not take gun violence se…
40	Who is Robert Bowers? Accused Pittsburgh synagogue shooter left anti-semitic trail	anonymous-source/all_shooting_images_newest/100500.jpg	[{'emotion': 'Fear', 'intensity': '2', 'reason': 'Given the context of gun violence, it can be assumed the person above was prosecuted for gun violence of some sort'}, {'emotion': 'Fear', 'intensity': '2', 'reason': 'the man/mugshot looks intimidating and he reminds me of John Wayne Gacy Jr.'}, {'emotion': 'Disgust', 'intensity': '3', 'reason': 'the person is a criminal that has committed atrocit…
41	A Black Security Guard Was Killed By Police As He Tried To Stop A Shooting	anonymous-source/all_shooting_images_newest/110335.jpg	[{'emotion': 'Contentment', 'intensity': '1', 'reason': 'Not sure how this relates to gun violence, I just see a selfie'}, {'emotion': 'Sadness', 'intensity': '2', 'reason': 'the man here seems to be a victim.'}, {'emotion': 'Sadness', 'intensity': '3', 'reason': 'I assume that he is a victim of police gun violence'}, {'emotion': 'Fear', 'intensity': '4', 'reason': 'because it reminds me of the p…
44	Judge blocks distribution of 3D-printed gun blueprints until case is resolved	anonymous-source/all_shooting_images_newest/128.jpg	[{'emotion': 'Fear', 'intensity': '4', 'reason': 'Looks like a 3D printed gun. With that new technology, it will be easier to make guns, even if they cannot do much damage they still have the potential to hurt people '}, {'emotion': 'Contentment', 'intensity': '1', 'reason': "I feel like the next best thing if gun rights cannot be changed, is better training and protocols put in place to make sur…
45	'Stay in your lane': Doctors fire back at the NRA over guns	anonymous-source/all_shooting_images_newest/110065.jpg	[{'emotion': 'Fear', 'intensity': '3', 'reason': 'I am confused as to why gun stores have to sell weapons of mass destruction. An AK47 is much different than a handgun. Why do people need such big guns?'}, {'emotion': 'Fear', 'intensity': '1', 'reason': "I've been inside a store that sells rifles for hunting. The gun on the counter makes me feel especially scared because of the color and size. it…
47	Police say Jacksonville shooter 'clearly targeted other gamers.' Here's what we know	anonymous-source/all_shooting_images_newest/386.jpg	[{'emotion': 'Fear', 'intensity': '3', 'reason': 'this photo demonstrates gun violence is everywhere. It looks like a local bar but with the context of gun violence, something happened'}, {'emotion': 'Sadness', 'intensity': '2', 'reason': "overtime these images only make me feel sad. I don't get angry because I feel like anger would only cause more divide and more issues."}, {'emotion': 'Sadness'…
48	Bank of America to Stop Financing Makers of Military-Style Guns	anonymous-source/all_shooting_images_newest/10755.jpg	[{'emotion': 'Fear', 'intensity': '2', 'reason': 'Seems like somewhere you could be held at gun point if no one was around'}, {'emotion': 'Fear', 'intensity': '3', 'reason': 'the image looks sketchy. I would do my best to not put myself in a potentially dangerous situation, like using an ATM at night.'}, {'emotion': 'Disgust', 'intensity': '3', 'reason': 'i imagine a robbery which is upsetting'},…
50	Orlando nightclub gunman remembered as abusive, homophobic and racist	anonymous-source/all_shooting_images_newest/110070.jpg	[{'emotion': 'Fear', 'intensity': '3', 'reason': 'Given the context of gun violence, this guy seems suspicious '}, {'emotion': 'Fear', 'intensity': '3', 'reason': "the man's look seems intimidating. I also never feel comfortable about selfies in a car because of similar stories of people taking their last photo/video before committing a heinous act."}, {'emotion': 'Disgust', 'intensity': '1', 're…
52	Trump s Stance on Guns Puts Pressure on Congress	anonymous-source/all_shooting_images_newest/10759.jpg	[{'emotion': 'Disgust', 'intensity': '3', 'reason': "Trump is so ignorant to many issues in the country, especially gun violence, I can't imagine what he is trying to say here. Probably something offensive or not helpful"}, {'emotion': 'Disgust', 'intensity': '3', 'reason': "the girl in the image doesn't seem to be expressing a positive emotion. She seems uncomfortable so I feel uncomfortable."},…
53	Dem lawmaker 'sickened' that Pa. school district will let teachers carry guns	anonymous-source/all_shooting_images_newest/100085.jpg	[{'emotion': 'Contentment', 'intensity': '1', 'reason': 'I do not know who this is so I am not sure how to relate it to gun violence '}, {'emotion': 'Disgust', 'intensity': '2', 'reason': "I don't like the way he's smiling. It seems like he knows something that I don't. He also seems privileged and that makes me feel a little bit disgusted."}, {'emotion': 'Disgust', 'intensity': '1', 'reason': "i…
54	Where do young Americans stand on guns?	anonymous-source/all_shooting_images_newest/157.jpg	[{'emotion': 'Fear', 'intensity': '3', 'reason': 'Looks like a 3D printed guns. With that new technology, it will be easier to make guns, even if they cannot do much damage they still have the potential to hurt people '}, {'emotion': 'Disgust', 'intensity': '2', 'reason': 'the training tools for firearm handling seem obsolete. I now feel like we should stop training people how to use guns and tak…
55	California Is Already Tough on Guns. After a Mass Shooting, Some Wonder if It s Enough	anonymous-source/all_shooting_images_newest/110229.jpg	[{'emotion': 'Contentment', 'intensity': '1', 'reason': 'These look like hunting guns, I do not feel strongly around this image. I guess any gun is dangerous though'}, {'emotion': 'Disgust', 'intensity': '1', 'reason': "there are so many guns for sale out in the world and I don't feel like it should be something everyone has, especially if they don't hunt."}, {'emotion': 'Disgust', 'intensity': '…
57	3 drivers say man charged in 'stand your ground' shooting death threatened them	anonymous-source/all_shooting_images_newest/391.jpg	[{'emotion': 'Fear', 'intensity': '5', 'reason': 'it looks like the man on the ground is begging for his life which is scary because it demonstrates the lack of empathy the shooter has (given the context of gun violence) '}, {'emotion': 'Fear', 'intensity': '4', 'reason': "I don't know the full context of what is going on but the elements in the photo make me scared (someone fleeing, someone on t…
65	3D Printing Vs Gun Control: Navigating The Paradox Analysis	anonymous-source/all_shooting_images_newest/90478.jpg	[{'emotion': 'Amusement', 'intensity': '2', 'reason': 'sad'}, {'emotion': 'Fear', 'intensity': '3', 'reason': 'I would want to know the context in which guns are being mentioned. We, as citizens should be aware of gun violence related happenings around us. '}, {'emotion': 'Disgust', 'intensity': '3', 'reason': 'so straightforward lol. just think it should be somehow limited'}, {'emotion': 'Fear',…
66	March for Our Rights rally draws thousands of pro-gun supporters in Washington state	anonymous-source/all_shooting_images_newest/10366.jpg	[{'emotion': 'Awe', 'intensity': '4', 'reason': 'sad'}, {'emotion': 'Sadness', 'intensity': '4', 'reason': 'It is really disturbing to see anyone with a gun, but I also understand why some people campaign for gun ownership. '}, {'emotion': 'Excitement', 'intensity': '4', 'reason': "the woman's words are exactly what I feel. Criminals with guns will not care about laws"}, {'emotion': 'Disgust', 'i…
67	Doves fly, hundreds form human chain and marquees go dark for 1 year anniversary of Las Vegas shooting	anonymous-source/all_shooting_images_newest/100288.jpg	[{'emotion': 'Amusement', 'intensity': '3', 'reason': 'sad'}, {'emotion': 'Fear', 'intensity': '3', 'reason': 'I would not know how to respond this without context'}, {'emotion': 'Awe', 'intensity': '2', 'reason': 'not quite sure what is happening but seems a solemn action'}, {'emotion': 'Sadness', 'intensity': '5', 'reason': "It's nice seeing people come together and show support for one another…
68	Naperville students remember shooting victims, call for gun reform during national school walkout	anonymous-source/all_shooting_images_newest/10590.jpg	[{'emotion': 'Amusement', 'intensity': '3', 'reason': 'sad'}, {'emotion': 'Fear', 'intensity': '3', 'reason': 'I would not know how to respond this without context'}, {'emotion': 'Contentment', 'intensity': '3', 'reason': 'young people should be protected, schools are important places'}, {'emotion': 'Fear', 'intensity': '3', 'reason': "As a student, you shouldn't feel unsafe in a place you were s…
69	NRA supporters are blowing up Yeti coolers. Yeti says it's all a big mistake.	anonymous-source/all_shooting_images_newest/10644.jpg	[{'emotion': 'Disgust', 'intensity': '3', 'reason': 'sad'}, {'emotion': 'Amusement', 'intensity': '3', 'reason': 'I would not know how to respond this without context'}, {'emotion': 'Fear', 'intensity': '3', 'reason': 'the boxes seems dangerous maybe weapons in them'}, {'emotion': 'Fear', 'intensity': '3', 'reason': "I'm not too sure what's going on in this picture"}, {'emotion': 'Fear', 'intensi…
74	Gun control advocates take their campaign to the state with more registered guns than any in the US - ABC News	anonymous-source/all_shooting_images_newest/110492.jpg	[{'emotion': 'Amusement', 'intensity': '1', 'reason': 'sad'}, {'emotion': 'Amusement', 'intensity': '3', 'reason': 'I would want to know the context in which guns are being mentioned. We, as citizens should be aware of gun control/ violence-related happenings around us. '}, {'emotion': 'Contentment', 'intensity': '2', 'reason': 'I think the woman is giving out useful suggestions'}, {'emotion': 'C…
75	The Kentucky Kroger shooting may have been a racist attack	anonymous-source/all_shooting_images_newest/100001.jpg	[{'emotion': 'Awe', 'intensity': '3', 'reason': 'sad'}, {'emotion': 'Fear', 'intensity': '3', 'reason': 'I would want to know the context in which guns are being mentioned. We, as citizens should be aware of gun violence related happenings around us. '}, {'emotion': 'Fear', 'intensity': '3', 'reason': 'guns can kill lives so easily'}, {'emotion': 'Disgust', 'intensity': '4', 'reason': 'Someone cr…
80	Retired firefighter found guilty for shooting at lost black teen on doorstep	anonymous-source/all_shooting_images_newest/100223.jpg	[{'emotion': 'Fear', 'intensity': '3', 'reason': 'Accompanied by gun violence, casualties will inevitably result.'}, {'emotion': 'Anger', 'intensity': '4', 'reason': 'he is shooting an animal '}, {'emotion': 'Fear', 'intensity': '2', 'reason': 'this would scare me so badly if it was in my neighborhood'}, {'emotion': 'Fear', 'intensity': '1', 'reason': 'typically places of lower income have more g…
81	Kroger shooting in Kentucky is being investigated as a hate crime	anonymous-source/all_shooting_images_newest/100460.jpg	[{'emotion': 'Sadness', 'intensity': '3', 'reason': 'Accompanied by gun violence, casualties will inevitably result.'}, {'emotion': 'Fear', 'intensity': '4', 'reason': 'I feel like this woman got killed'}, {'emotion': 'Sadness', 'intensity': '3', 'reason': 'these people probably died from gun violence and it makes me sad'}, {'emotion': 'Sadness', 'intensity': '3', 'reason': 'these feel like pictu…
86	In a Crucial Pennsylvania District, Gun Policy Reigns Supreme	anonymous-source/all_shooting_images_newest/100140.jpg	[{'emotion': 'Contentment', 'intensity': '3', 'reason': 'More and more people are aware of the dangers of gun violence.'}, {'emotion': 'Amusement', 'intensity': '4', 'reason': 'I feel like someone really cares abt gun violence.'}, {'emotion': 'Contentment', 'intensity': '1', 'reason': "I don't really understand what is going on here at all"}, {'emotion': 'Contentment', 'intensity': '3', 'reason':…
87	Video of Columbine Massacre Shown in School for Active Shooter Training	anonymous-source/all_shooting_images_newest/10508.jpg	[{'emotion': 'Fear', 'intensity': '3', 'reason': 'Accompanied by gun violence, casualties will inevitably result.'}, {'emotion': 'Fear', 'intensity': '4', 'reason': 'I feel like something bad is going to happen '}, {'emotion': 'Disgust', 'intensity': '5', 'reason': "the Columbine shooting affected me so much and made me so fearful in high school it disgusts me now I don't know how they could have…
91	California bar massacre leaves another American community reeling after 12 gunned down by Marine veteran	anonymous-source/all_shooting_images_newest/110043.jpg	[{'emotion': 'Sadness', 'intensity': '3', 'reason': 'Accompanied by gun violence, casualties will inevitably result.'}, {'emotion': 'Sadness', 'intensity': '3', 'reason': 'their family might have died'}, {'emotion': 'Sadness', 'intensity': '2', 'reason': 'this looks like a group of people mourning an unexpected loss to gun violence'}, {'emotion': 'Sadness', 'intensity': '3', 'reason': 'families s…
92	In closed-door meeting, Roskam brings pro-gun rights teens to talk gun violence prevention with students	anonymous-source/all_shooting_images_newest/10653.jpg	[{'emotion': 'Contentment', 'intensity': '3', 'reason': 'More and more people are aware of the dangers of gun violence.'}, {'emotion': 'Disgust', 'intensity': '2', 'reason': 'this seems to be another political issue'}, {'emotion': 'Contentment', 'intensity': '1', 'reason': "I don't feel anything because I don't know who he is"}, {'emotion': 'Contentment', 'intensity': '1', 'reason': 'this photo d…
96	As US midterms approach, moms hit the trail to preach gun control	anonymous-source/all_shooting_images_newest/100152.jpg	[{'emotion': 'Contentment', 'intensity': '3', 'reason': 'More and more people are aware of the dangers of gun violence.'}, {'emotion': 'Excitement', 'intensity': '1', 'reason': 'I cannot relate with this picture'}, {'emotion': 'Contentment', 'intensity': '1', 'reason': "I don't know who this is"}, {'emotion': 'Contentment', 'intensity': '3', 'reason': 'figures who seem gentle and nice make me mor…
97	Trump on Florida shooting: Classmates, neighbors should have reported gunman Nikolas Cruz	anonymous-source/all_shooting_images_newest/10550.jpg	[{'emotion': 'Sadness', 'intensity': '3', 'reason': 'Accompanied by gun violence, casualties will inevitably result.'}, {'emotion': 'Awe', 'intensity': '4', 'reason': 'something bad might have happened to them '}, {'emotion': 'Sadness', 'intensity': '4', 'reason': 'it reminds me of gun violence tragedies and makes me sad because no one should have to go through this kind of pain'}, {'emotion': 'S…
101	Trump Briefly Responds To Santa Fe School Shooting Before Pivoting	anonymous-source/all_shooting_images_newest/10120.jpg	[{'emotion': 'Anger', 'intensity': '3', 'reason': 'bad thing'}, {'emotion': 'Disgust', 'intensity': '3', 'reason': 'I do not like him'}, {'emotion': 'Disgust', 'intensity': '2', 'reason': 'when I think of gun control, I think of Donald trump in some ways'}, {'emotion': 'Excitement', 'intensity': '3', 'reason': 'More and more people are aware of the dangers of gun violence.'}, {'emotion': 'Disgust…
104	Gun manufacturer waited months to warn the public its pistol could fire when dropped	anonymous-source/all_shooting_images_newest/10354.jpg	[{'emotion': 'Fear', 'intensity': '3', 'reason': 'A trebuchet'}, {'emotion': 'Disgust', 'intensity': '1', 'reason': "I don't know the purpose of this photo but it can't be good "}, {'emotion': 'Fear', 'intensity': '4', 'reason': 'this pic gives me a more vivd pic of what gun violence is like '}, {'emotion': 'Disgust', 'intensity': '3', 'reason': 'I hope not to sell guns.'}, {'emotion': 'Fear', 'i…
105	Trump backs effort to improve gun background checks	anonymous-source/all_shooting_images_newest/10106.jpg	[{'emotion': 'Sadness', 'intensity': '3', 'reason': 'crying'}, {'emotion': 'Sadness', 'intensity': '2', 'reason': 'i feel bad for her and everything that she went through '}, {'emotion': 'Sadness', 'intensity': '4', 'reason': "gun violence did take away lot of people's life "}, {'emotion': 'Anger', 'intensity': '3', 'reason': 'Accompanied by gun violence, casualties will inevitably result.'}, {'e…
106	Las Vegas Shooting: Retired Carpenter Builds New Memorial of 58 Crosses Ahead of Anniversary	anonymous-source/all_shooting_images_newest/90220.jpg	[{'emotion': 'Sadness', 'intensity': '3', 'reason': 'respect'}, {'emotion': 'Sadness', 'intensity': '1', 'reason': 'it makes me sad to see all of those crosses'}, {'emotion': 'Sadness', 'intensity': '4', 'reason': "gun violence did take away lot of people's life "}, {'emotion': 'Sadness', 'intensity': '3', 'reason': 'Accompanied by gun violence, casualties will inevitably result.'}, {'emotion': '…
107	After California shooting, Democrats vow to tackle gun violence | Fox News	anonymous-source/all_shooting_images_newest/110511.jpg	[{'emotion': 'Fear', 'intensity': '3', 'reason': 'The scene of the accident'}, {'emotion': 'Fear', 'intensity': '1', 'reason': 'it scares me because it looks like something horrible is going on and if were to show up on the news then i would be very concerned. '}, {'emotion': 'Fear', 'intensity': '4', 'reason': 'this makes me feel like gun violence do exists in our life'}, {'emotion': 'Anger', 'i…
110	3D-Printed Guns Are Unchecked and Untraceable. And a Judge Blocked Them at the Last Minute	anonymous-source/all_shooting_images_newest/417.jpg	[{'emotion': 'Fear', 'intensity': '3', 'reason': 'A trebuchet'}, {'emotion': 'Disgust', 'intensity': '1', 'reason': "I don't know who he is or what is going on but something about him disgusts me "}, {'emotion': 'Fear', 'intensity': '4', 'reason': 'the background is our everyday life feels more real'}, {'emotion': 'Disgust', 'intensity': '3', 'reason': 'Accompanied by gun violence, casualties wil…
113	White male 'gun nuts' are 'biggest terrorist organization on the planet,' Tennessee Dem ally wrote online: report	anonymous-source/all_shooting_images_newest/100461.jpg	[{'emotion': 'Sadness', 'intensity': '4', 'reason': 'The victim'}, {'emotion': 'Contentment', 'intensity': '1', 'reason': "I don't know who that is or the context of this"}, {'emotion': 'Fear', 'intensity': '3', 'reason': '/'}, {'emotion': 'Sadness', 'intensity': '3', 'reason': 'Accompanied by gun violence, casualties will inevitably result.'}, {'emotion': 'Fear', 'intensity': '1', 'reason': 'it …
114	Top Senate Dem admits: No gun control law would have stopped Santa Fe massacre	anonymous-source/all_shooting_images_newest/10385.jpg	[{'emotion': 'Fear', 'intensity': '4', 'reason': 'A trebuchet'}, {'emotion': 'Disgust', 'intensity': '3', 'reason': 'There is no need for civilians to have assault rifles '}, {'emotion': 'Fear', 'intensity': '4', 'reason': 'this is more like terrorism instead of gun violence'}, {'emotion': 'Disgust', 'intensity': '5', 'reason': 'I hope not to sell guns.'}, {'emotion': 'Fear', 'intensity': '3', 'r…
115	What students need to do to get more gun-control laws passed: Keep the media's attention	anonymous-source/all_shooting_images_newest/10113.jpg	[{'emotion': 'Sadness', 'intensity': '3', 'reason': 'unity'}, {'emotion': 'Sadness', 'intensity': '1', 'reason': "I'm sad that literal children feel the need to protest gun violence and I feel bad for them "}, {'emotion': 'Contentment', 'intensity': '4', 'reason': 'gun violence is a big thing in school '}, {'emotion': 'Excitement', 'intensity': '4', 'reason': 'More and more people are aware of th…
117	Florida Yoga Studio Shooting Suspect Was A Far-Right Misogynist	anonymous-source/all_shooting_images_newest/110513.jpg	[{'emotion': 'Fear', 'intensity': '3', 'reason': 'The scene of the accident'}, {'emotion': 'Fear', 'intensity': '3', 'reason': "this looks like a scary situation and in this context it makes me feel like something really bad happened but i'm not sure what so i'm scared"}, {'emotion': 'Fear', 'intensity': '2', 'reason': 'something might happened '}, {'emotion': 'Fear', 'intensity': '3', 'reason': …
120	Suspect In Fatal Kroger Shooting First Tried To Get Inside Black Church: Police	anonymous-source/all_shooting_images_newest/100083.jpg	[{'emotion': 'Fear', 'intensity': '4', 'reason': 'Rich facial expression '}, {'emotion': 'Fear', 'intensity': '3', 'reason': 'He looks so terrifying'}, {'emotion': 'Fear', 'intensity': '5', 'reason': 'im scared of the look on his face he looks dangerous'}, {'emotion': 'Fear', 'intensity': '3', 'reason': "I don't who this guy is but he looks guilty"}, {'emotion': 'Contentment', 'intensity': '3', '…
121	Aurora cross man gets helping hearts from Covenant students for Las Vegas shooting anniversary trip	anonymous-source/all_shooting_images_newest/100103.jpg	[{'emotion': 'Sadness', 'intensity': '2', 'reason': 'Feeling of empathy '}, {'emotion': 'Sadness', 'intensity': '3', 'reason': 'it makes me so sad to see this heart'}, {'emotion': 'Sadness', 'intensity': '4', 'reason': 'the sadness of mourning a loved one is the most painful experience'}, {'emotion': 'Sadness', 'intensity': '4', 'reason': 'I would assume he lost his child/a loved one to gun viole…
127	Mom: Thanks to active-shooter drills at school, my 4-year-old thought fireworks were gunshots. Enough already.	anonymous-source/all_shooting_images_newest/110494.jpg	[{'emotion': 'Sadness', 'intensity': '3', 'reason': 'Sense of empathy '}, {'emotion': 'Sadness', 'intensity': '3', 'reason': 'This world is beautiful because of most kind people'}, {'emotion': 'Sadness', 'intensity': '3', 'reason': 'people mourning is so painful'}, {'emotion': 'Sadness', 'intensity': '4', 'reason': 'She looks like she lost someone'}, {'emotion': 'Contentment', 'intensity': '3', '…
131	Tragic twist in synagogue shooting where gunman 'wanted all jews to die'	anonymous-source/all_shooting_images_newest/100134.jpg	[{'emotion': 'Excitement', 'intensity': '3', 'reason': 'Not much emotions raised without context '}, {'emotion': 'Fear', 'intensity': '3', 'reason': 'who is he?\r\n'}, {'emotion': 'Sadness', 'intensity': '3', 'reason': 'im jewish and we are constantly targeted '}, {'emotion': 'Disgust', 'intensity': '5', 'reason': 'If this is the perpetrator, he committed a hate crime.'}, {'emotion': 'Contentment…
135	South Florida billionaire: I won't give any money to politicians who don't support gun control	anonymous-source/all_shooting_images_newest/10665.jpg	[{'emotion': 'Fear', 'intensity': '3', 'reason': 'Sense of insecure '}, {'emotion': 'Fear', 'intensity': '3', 'reason': 'I just afraid of guns'}, {'emotion': 'Disgust', 'intensity': '3', 'reason': 'its so easy to buy a gun without a background check'}, {'emotion': 'Anger', 'intensity': '2', 'reason': 'Nobody needs this many guns\r\n'}, {'emotion': 'Contentment', 'intensity': '3', 'reason': 'they …
137	Clippers and Bucks wear T-shirts saying 'Enough' on front, with shooting victims names on back	anonymous-source/all_shooting_images_newest/110506.jpg	[{'emotion': 'Sadness', 'intensity': '3', 'reason': 'Sense of empathy '}, {'emotion': 'Sadness', 'intensity': '3', 'reason': 'I feel so sad for these people, they should not be like this'}, {'emotion': 'Sadness', 'intensity': '3', 'reason': 'this country has had too many memorials'}, {'emotion': 'Sadness', 'intensity': '3', 'reason': "I'm sad this has to be done, but glad that sports players are …
144	EA Launches Safety Review in Wake of Jacksonville Shooting	anonymous-source/all_shooting_images_newest/291.jpg	[{'emotion': 'Fear', 'intensity': '3', 'reason': 'No emotions are raised '}, {'emotion': 'Fear', 'intensity': '4', 'reason': 'I feel fear at people that use guns to harm people'}, {'emotion': 'Fear', 'intensity': '4', 'reason': 'tere are police coming around '}, {'emotion': 'Fear', 'intensity': '3', 'reason': 'I do not know what is happening, but it seems like soemone(s) could be in harms way. '}…
145	Shares of Gun Makers Rally Ahead of Election Outcome	anonymous-source/all_shooting_images_newest/110455.jpg	[{'emotion': 'Fear', 'intensity': '3', 'reason': 'No emotions are raised '}, {'emotion': 'Fear', 'intensity': '4', 'reason': 'I feel fear at people that use guns to harm people'}, {'emotion': 'Fear', 'intensity': '4', 'reason': 'so many guns '}, {'emotion': 'Anger', 'intensity': '3', 'reason': 'It reminds me that guns are easy to buy, and they are not usually locked up in a way that prevents them…
147	Hollywood Calls for Gun Control, Urges Voting in Wake of Synagogue Massacre	anonymous-source/all_shooting_images_newest/100492.jpg	[{'emotion': 'Sadness', 'intensity': '3', 'reason': 'Feeling of empathy '}, {'emotion': 'Sadness', 'intensity': '4', 'reason': 'I feel sad for people that are harmed by guns'}, {'emotion': 'Sadness', 'intensity': '4', 'reason': 'people are giving flowers in graveyard'}, {'emotion': 'Sadness', 'intensity': '3', 'reason': 'It reminds me how young children and families are impacted by gun violence. …
150	EA cancels eSports tournament amid security fears after Jacksonville shooting	anonymous-source/all_shooting_images_newest/90.jpg	[{'emotion': 'Sadness', 'intensity': '3', 'reason': 'Rich facial expressions '}, {'emotion': 'Anger', 'intensity': '4', 'reason': 'I feel anger at people that use guns to hurt people'}, {'emotion': 'Fear', 'intensity': '4', 'reason': "I don't knwo what is happening. cant tell any emotions"}, {'emotion': 'Fear', 'intensity': '3', 'reason': 'I do not know who the man in the photo is, but the expres…
151	What to Do When There s an Active Shooter	anonymous-source/all_shooting_images_newest/10464.jpg	[{'emotion': 'Sadness', 'intensity': '3', 'reason': 'Sense of empathy '}, {'emotion': 'Sadness', 'intensity': '4', 'reason': 'I feel sad for people that are harmed by guns'}, {'emotion': 'Sadness', 'intensity': '3', 'reason': 'people are crying '}, {'emotion': 'Sadness', 'intensity': '3', 'reason': 'It seems like something bad has happened, and I feel bad for the people in the photo. '}, {'emotio…
154	Mass Shooting at Florida Esports Event Raises Questions About Security	anonymous-source/all_shooting_images_newest/302.jpg	[{'emotion': 'Excitement', 'intensity': '3', 'reason': 'No emotions raised '}, {'emotion': 'Fear', 'intensity': '4', 'reason': 'I feel fear about people that are harmed by guns because that can also be myself'}, {'emotion': 'Fear', 'intensity': '3', 'reason': 'police are coming around'}, {'emotion': 'Fear', 'intensity': '3', 'reason': 'I am reminded by the fact that police can be both good and ba…
155	Is the Sandy Hook massacre the real reason behind the gunmaker's bankruptcy?	anonymous-source/all_shooting_images_newest/10176.jpg	[{'emotion': 'Excitement', 'intensity': '3', 'reason': 'No emotions are raised '}, {'emotion': 'Disgust', 'intensity': '4', 'reason': 'I feel disgust about people that use guns to harm other people'}, {'emotion': 'Fear', 'intensity': '4', 'reason': 'I am very scared of guns '}, {'emotion': 'Anger', 'intensity': '3', 'reason': 'I am angered by how easy it is for people to access guns. '}, {'emotio…
157	Eiffel Tower goes dark to honor Pittsburgh shooting victims	anonymous-source/all_shooting_images_newest/100494.jpg	[{'emotion': 'Sadness', 'intensity': '3', 'reason': 'No emotions are raised '}, {'emotion': 'Sadness', 'intensity': '4', 'reason': 'I feel fear at people that use guns to harm people'}, {'emotion': 'Excitement', 'intensity': '3', 'reason': "I don't know what this represents "}, {'emotion': 'Sadness', 'intensity': '3', 'reason': 'I am reminded of the powerful ways people have mourned victims of gu…
160	Robert Bowers arrest: Pittsburgh synagogue shooting suspect charged with 44 counts including hate crimes	anonymous-source/all_shooting_images_newest/110514.jpg	[{'emotion': 'Sadness', 'intensity': '2', 'reason': 'I did not know who the man was or his relation to gun violence until I looked him up. After looking him up, I felt sad because the story, along with other news about gun violence, made me feel hopeless.'}, {'emotion': 'Disgust', 'intensity': '1', 'reason': 'He might be a perpetrator of gun violence. '}, {'emotion': 'Fear', 'intensity': '3', 're…
161	Donald Trump says Second Amendment 'will never be repealed' following ex-Supreme Court judge's comments	anonymous-source/all_shooting_images_newest/10022.jpg	[{'emotion': 'Disgust', 'intensity': '4', 'reason': 'I feel like former president Trump did not do enough to stop gun violence.'}, {'emotion': 'Disgust', 'intensity': '5', 'reason': "He's spewed hatred and encouraged violence for years. "}, {'emotion': 'Sadness', 'intensity': '3', 'reason': 'it makes me sad how trump perceived himself'}, {'emotion': 'Disgust', 'intensity': '5', 'reason': "I don't…
162	Advocates warn against linking mass shootings, mental illness after Trump tweet	anonymous-source/all_shooting_images_newest/10826.jpg	[{'emotion': 'Fear', 'intensity': '2', 'reason': "I feel like he is smirking, making me feel like he's hiding something."}, {'emotion': 'Disgust', 'intensity': '5', 'reason': "He's a piece of shit. "}, {'emotion': 'Disgust', 'intensity': '3', 'reason': 'his facial expression makes me feel disgusted because he looks disrespectful towards whoever is speaking'}, {'emotion': 'Disgust', 'intensity': '…
163	Trump Suggests Armed Guard Could Have Stopped Pittsburgh Synagogue Shooting	anonymous-source/all_shooting_images_newest/100266.jpg	[{'emotion': 'Disgust', 'intensity': '2', 'reason': 'I think there a lot of people that support the man in the image.'}, {'emotion': 'Disgust', 'intensity': '5', 'reason': "Again, he's a horrible man. "}, {'emotion': 'Sadness', 'intensity': '3', 'reason': 'it makes me sad how many supported Trump has'}, {'emotion': 'Anger', 'intensity': '1', 'reason': "I don't like him but this photo didn't make …
166	US military adds more than 4,000 names to gun background check database after Texas mass shooting	anonymous-source/all_shooting_images_newest/10461.jpg	[{'emotion': 'Sadness', 'intensity': '5', 'reason': 'death makes me sad.'}, {'emotion': 'Sadness', 'intensity': '3', 'reason': "It's sad that children have lost their lives. "}, {'emotion': 'Sadness', 'intensity': '3', 'reason': "it's sad because it reminds me of the church shooting"}, {'emotion': 'Sadness', 'intensity': '5', 'reason': "those people died for no reason/they weren't meant to die so…
171	Watch Donald Trump, Marco Rubio, and Rick Scott Address the NRA	anonymous-source/all_shooting_images_newest/10027.jpg	[{'emotion': 'Disgust', 'intensity': '4', 'reason': "I feel like a lot of the people who support gun rights don't have a solution to gun violence."}, {'emotion': 'Disgust', 'intensity': '5', 'reason': "He's encouraged and helped the NRA to spew propaganda in favor of less gun control. "}, {'emotion': 'Anger', 'intensity': '3', 'reason': 'how trump helped the nra'}, {'emotion': 'Disgust', 'intensi…
172	Donald Trump Jr. Uses YouTube Shooting To Make Incoherent Rant About The Left	anonymous-source/all_shooting_images_newest/10828.jpg	[{'emotion': 'Disgust', 'intensity': '3', 'reason': "I don't like Donald Trump Jr. and the people he associates with."}, {'emotion': 'Disgust', 'intensity': '5', 'reason': 'No better than his father. '}, {'emotion': 'Anger', 'intensity': '3', 'reason': "I don't know much about trump jr in the context of gun violence"}, {'emotion': 'Disgust', 'intensity': '4', 'reason': "I really don't like the tr…
175	Rohrabacher s allegiance to the NRA is just another reason not to vote for him	anonymous-source/all_shooting_images_newest/10476.jpg	[{'emotion': 'Sadness', 'intensity': '3', 'reason': 'the loss of a friend or family member is always sad to me.'}, {'emotion': 'Sadness', 'intensity': '2', 'reason': 'The death of a loved one is always sad.'}, {'emotion': 'Sadness', 'intensity': '3', 'reason': 'someone died in the context of gun violence and people are mourning as well'}, {'emotion': 'Sadness', 'intensity': '5', 'reason': 'that p…
179	1 in 5 U.S. Gun Owners Use Drugs, Report Mental Health Condition: Survey	anonymous-source/all_shooting_images_newest/10843.jpg	[{'emotion': 'Fear', 'intensity': '4', 'reason': "They aren't holding the guns properly and seem to be carelessly holding them. "}, {'emotion': 'Fear', 'intensity': '3', 'reason': "It's terrifying to see such large guns casually held. "}, {'emotion': 'Fear', 'intensity': '3', 'reason': "It's terrifying to see such large guns casually held. "}, {'emotion': 'Fear', 'intensity': '3', 'reason': 'why …
185	PayPal bans Gab in wake of Pittsburgh mass shooting	anonymous-source/all_shooting_images_newest/100225.jpg	[{'emotion': 'Sadness', 'intensity': '2', 'reason': 'They are grieving'}, {'emotion': 'Sadness', 'intensity': '3', 'reason': 'I feel as though they are praying peacfully for lost victims'}, {'emotion': 'Sadness', 'intensity': '3', 'reason': 'I feel as though they are praying peacfully for lost victims'}, {'emotion': 'Sadness', 'intensity': '3', 'reason': 'guns lead to more violence and sadness'},…
186	Two ways to curb gun violence: Smaller clips and classes	anonymous-source/all_shooting_images_newest/10505.jpg	[{'emotion': 'Sadness', 'intensity': '2', 'reason': 'School shootings.'}, {'emotion': 'Fear', 'intensity': '5', 'reason': "School is supposed to be a fun and fundamental part of a child's growth. For this to be a battlefield is so so so sad, scary, and wrong. "}, {'emotion': 'Fear', 'intensity': '5', 'reason': "School is supposed to be a fun and fundamental part of a child's growth. For this to b…
188	Mass shootings 'increasing'and pose'most serious threat' in US, expert says	anonymous-source/all_shooting_images_newest/110490.jpg	[{'emotion': 'Sadness', 'intensity': '2', 'reason': 'they are sad'}, {'emotion': 'Sadness', 'intensity': '3', 'reason': "I feel bad for this person. But I don't know what's happening. "}, {'emotion': 'Sadness', 'intensity': '3', 'reason': "I feel bad for this person. But I don't know what's happening. "}, {'emotion': 'Fear', 'intensity': '3', 'reason': 'school shootings happen so often when it sh…
194	Thousands head to DC for gun control protest Video	anonymous-source/all_shooting_images_newest/10302.jpg	[{'emotion': 'Sadness', 'intensity': '2', 'reason': 'kids have to worry about their school being a safe place. '}, {'emotion': 'Sadness', 'intensity': '3', 'reason': 'I feel sad but empowered for them'}, {'emotion': 'Sadness', 'intensity': '3', 'reason': 'I feel sad but empowered for them'}, {'emotion': 'Sadness', 'intensity': '3', 'reason': 'guns should not be anywhere near schools'}, {'emotion'…
195	Muslim groups raise money for victims after Pittsburgh synagogue shooting	anonymous-source/all_shooting_images_newest/100230.jpg	[{'emotion': 'Sadness', 'intensity': '4', 'reason': "so many people die when they don't have to. "}, {'emotion': 'Sadness', 'intensity': '3', 'reason': 'Sad but peaceful for the lost ones'}, {'emotion': 'Sadness', 'intensity': '3', 'reason': 'Sad but peaceful for the lost ones'}, {'emotion': 'Sadness', 'intensity': '5', 'reason': 'school shootings are tragic events'}, {'emotion': 'Sadness', 'inte…
200	Students call for action after Florida school mass shooting	anonymous-source/all_shooting_images_newest/10015.jpg	[{'emotion': 'Sadness', 'intensity': '2', 'reason': 'I can imagine these students are speaking about gun violence and no child should even have to know what that is'}, {'emotion': 'Contentment', 'intensity': '3', 'reason': 'no emotion detected'}, {'emotion': 'Sadness', 'intensity': '3', 'reason': 'Because with gun violence, people will inevitably be injured or even killed.'}, {'emotion': 'Sadness…
204	Flap over funeral doves prompts arrest of California man, seizure of cache of guns and Nazi paraphernalia	anonymous-source/all_shooting_images_newest/110132.jpg	[{'emotion': 'Disgust', 'intensity': '5', 'reason': "only crazy people with bad intentions would have so many guns I don't understand how this could be a good thing for anybody no one should have so many guns."}, {'emotion': 'Fear', 'intensity': '3', 'reason': 'guns scare me'}, {'emotion': 'Disgust', 'intensity': '3', 'reason': 'I hope not to sell guns.'}, {'emotion': 'Anger', 'intensity': '5', '…
206	Las Vegas shooting: Memorial events mark 1-year anniversary as massacre motive still shrouded in mystery	anonymous-source/all_shooting_images_newest/100424.jpg	[{'emotion': 'Sadness', 'intensity': '4', 'reason': 'this implies that someone has died and that made me really sad'}, {'emotion': 'Sadness', 'intensity': '5', 'reason': 'it portrays people that just lost a friend or family member'}, {'emotion': 'Sadness', 'intensity': '3', 'reason': 'Because with gun violence, people will inevitably be injured or even killed.'}, {'emotion': 'Sadness', 'intensity…
213	Harwood Heights police conduct active shooter drill at Eisenhower library: 'You have to have a plan'	anonymous-source/all_shooting_images_newest/127.jpg	[{'emotion': 'Disgust', 'intensity': '1', 'reason': "I cant tell what is happening here but I feel disgust because I don't really like how heavily the police are funded yet not trained enough on moments of crisis"}, {'emotion': 'Amusement', 'intensity': '4', 'reason': 'looks more like a movie scene than an actual police activity (the guy in the back is kinda laughing)'}, {'emotion': 'Fear', 'inte…
216	More gun laws won't curb gun crime	anonymous-source/all_shooting_images_newest/100429.jpg	[{'emotion': 'Sadness', 'intensity': '1', 'reason': 'I assume this is a list of people who have died to gun violence and it is too long'}, {'emotion': 'Sadness', 'intensity': '5', 'reason': 'death make me feel sad '}, {'emotion': 'Sadness', 'intensity': '3', 'reason': 'Gun violence is very easy to cause casualties'}, {'emotion': 'Sadness', 'intensity': '2', 'reason': 'This looks like a memorial, …
219	Son Of Witness: Suspect In Fatal Kroger Shooting Said 'Whites Don't Kill Whites'	anonymous-source/all_shooting_images_newest/100236.jpg	[{'emotion': 'Fear', 'intensity': '4', 'reason': 'Stare people'}, {'emotion': 'Fear', 'intensity': '2', 'reason': 'The man seems very upset and menacing. In the context of gun violence, I am unsure if he wants to hurt more people or not, so I am scared.'}, {'emotion': 'Fear', 'intensity': '1', 'reason': "The almost crazed expression on the man's face makes me feel mild fear"}, {'emotion': 'Fear',…
220	A Mall Shooting, a Black Man s Death, and a Debate Over Race and Gun Rights	anonymous-source/all_shooting_images_newest/110088.jpg	[{'emotion': 'Contentment', 'intensity': '3', 'reason': 'army'}, {'emotion': 'Sadness', 'intensity': '3', 'reason': 'I feel sad that gun violence can affect veterans, who have already given up a lot for our country.'}, {'emotion': 'Awe', 'intensity': '1', 'reason': 'I am in mild awe as seeing a man enlist in the military is an act of duty and patriotism'}, {'emotion': 'Awe', 'intensity': '3', 're…
221	The Latest: Trump postpones Penn. rally after shooting	anonymous-source/all_shooting_images_newest/10654.jpg	[{'emotion': 'Awe', 'intensity': '3', 'reason': 'positive energy'}, {'emotion': 'Sadness', 'intensity': '1', 'reason': 'the president was addressing a national tragedy that occurred. The fact that the shooting was so bad that the president had to address it makes me sad. '}, {'emotion': 'Disgust', 'intensity': '3', 'reason': 'As a Florida resident, the last thing I wanted after the Parkland shoot…
225	Gun violence, health care among top concerns for women, especially minorities, new survey finds	anonymous-source/all_shooting_images_newest/100311.jpg	[{'emotion': 'Excitement', 'intensity': '4', 'reason': 'It makes me feel safe that everyone all gather together'}, {'emotion': 'Contentment', 'intensity': '1', 'reason': 'people are passionate enough about preventing gun violence that they are gathering en masse.'}, {'emotion': 'Awe', 'intensity': '1', 'reason': 'Seeing so many people come together to presumably advocate for change invokes a mild…
226	Let's hope the Salvador Castro Middle School shooting finally wakes up L.A. Unified on school safety	anonymous-source/all_shooting_images_newest/10641.jpg	[{'emotion': 'Fear', 'intensity': '3', 'reason': 'casualties'}, {'emotion': 'Fear', 'intensity': '4', 'reason': 'there seems to be a large police and first responder presence, so I wonder how many people have been hurt.'}, {'emotion': 'Sadness', 'intensity': '2', 'reason': 'I feel pretty sad by the photo as I fear that people may have been hurt or may have been killed'}, {'emotion': 'Sadness', 'i…
229	Kroger grocery store gunman tried to enter predominantly black church before shooting, police say	anonymous-source/all_shooting_images_newest/100251.jpg	[{'emotion': 'Anger', 'intensity': '3', 'reason': 'prisoner'}, {'emotion': 'Fear', 'intensity': '2', 'reason': 'the man looks like he wants to hurt other people even while in police custody'}, {'emotion': 'Disgust', 'intensity': '3', 'reason': 'The man has clearly been alleged to have committed a crime, which makes me feel a moderate amount of disgust'}, {'emotion': 'Fear', 'intensity': '4', 'rea…
230	After back-to-back mass shootings, America grows numb	anonymous-source/all_shooting_images_newest/110105.jpg	[{'emotion': 'Sadness', 'intensity': '3', 'reason': 'crying'}, {'emotion': 'Sadness', 'intensity': '4', 'reason': 'the person is clearly affected by the death of a loved one'}, {'emotion': 'Sadness', 'intensity': '3', 'reason': 'I empathize with the girl crying and thus feel a moderate sadness for she is clearly grieving'}, {'emotion': 'Sadness', 'intensity': '4', 'reason': 'this picture is heart…
235	Gays Against Guns claims victory as FedEx ends NRA discount	anonymous-source/all_shooting_images_newest/100338.jpg	[{'emotion': 'Excitement', 'intensity': '3', 'reason': 'protest'}, {'emotion': 'Excitement', 'intensity': '2', 'reason': 'a community has come together to protest something they feel strongly about, and it shows that gun violence affects many communities in America. '}, {'emotion': 'Excitement', 'intensity': '4', 'reason': 'Seeing so many people of the LGBTQ+ community together walking for change…
236	Waffle House shooting illustrates the danger posed by gun-free zones	anonymous-source/all_shooting_images_newest/10708.jpg	[{'emotion': 'Fear', 'intensity': '3', 'reason': 'police car'}, {'emotion': 'Fear', 'intensity': '1', 'reason': 'a shooting could occur anywhere, even at a restaurant where you bring your kids'}, {'emotion': 'Sadness', 'intensity': '2', 'reason': 'I am saddened that a crime has been committed and hope no one is hurt, I am also saddened that such situations seem to happen so often.'}, {'emotion': …
237	NRA spokeswoman to Warren: Most Americans have native heritage	anonymous-source/all_shooting_images_newest/100153.jpg	[{'emotion': 'Contentment', 'intensity': '3', 'reason': 'speech'}, {'emotion': 'Sadness', 'intensity': '2', 'reason': 'people who attend CPAC often oppose common sense gun laws'}, {'emotion': 'Disgust', 'intensity': '1', 'reason': "Between the woman's body position that seems arrogant, she is also a representative of the American conservative union which invokes a mild feeling of disgust."}, {'em…
238	Disturbing as hell': NRA slammed for giving 'Thomas & Friends' characters a KKK makeover	anonymous-source/all_shooting_images_newest/90470.jpg	[{'emotion': 'Amusement', 'intensity': '1', 'reason': 'whimsy'}, {'emotion': 'Disgust', 'intensity': '4', 'reason': 'a childrens show is being used in a violent manner to serve as propaganda '}, {'emotion': 'Disgust', 'intensity': '5', 'reason': 'I am absolutely disgusted by the fact that Thomas the Tank Engine and Friends have been altered to wear KKK hoods, as my favorite childhood show was tur…
239	3-D Printed Gun Blueprints Are Back, and Only New Laws Can Stop Them	anonymous-source/all_shooting_images_newest/299.jpg	[{'emotion': 'Fear', 'intensity': '4', 'reason': 'anything in the context of gun violence scares me '}, {'emotion': 'Fear', 'intensity': '1', 'reason': 'his face makes me feel uncomfortable because there seems to be no emotion in it, and in the context of gun violence it makes it unsettling '}, {'emotion': 'Contentment', 'intensity': '2', 'reason': 'his look is funny'}, {'emotion': 'Sadness', 'in…
240	Left brings campaign against gun-makers to Wall Street	anonymous-source/all_shooting_images_newest/10096.jpg	[{'emotion': 'Contentment', 'intensity': '3', 'reason': 'because I think she supports stricter gun laws'}, {'emotion': 'Contentment', 'intensity': '1', 'reason': "she doesn't really represent anything bad when it comes to gun violence so there isn't any negative emotion associated with her."}, {'emotion': 'Anger', 'intensity': '1', 'reason': 'her expression seems angry which makes me kind of angr…
243	How gun background checks work	anonymous-source/all_shooting_images_newest/10138.jpg	[{'emotion': 'Fear', 'intensity': '5', 'reason': 'that is a weapon that could execute a mass shooting '}, {'emotion': 'Anger', 'intensity': '2', 'reason': "this reminds me of a news feature that another shooting has happened or someone has gotten their hands on another assault rifle that they don't need. I think it's more annoyance than anger because the solution could be so easy, but people are …
245	Teachers who survived shootings at Columbine, Sandy Hook, and Rancho Tehama discuss going back into the classroom.	anonymous-source/all_shooting_images_newest/90037.jpg	[{'emotion': 'Sadness', 'intensity': '5', 'reason': 'because they may have lost their lives in the shooting '}, {'emotion': 'Sadness', 'intensity': '4', 'reason': "this brought tears to my eyes seeing the sandy hook elementary part. It's sad that people died, and I was in school when it happened and I remember the changes and the tension that surrounded the events. Plus the fact that it was an el…
246	I chose to show him empathy': Jewish nurse who treated synagogue shooting suspect	anonymous-source/all_shooting_images_newest/110375.jpg	[{'emotion': 'Fear', 'intensity': '5', 'reason': 'because that is scary to imagine '}, {'emotion': 'Fear', 'intensity': '1', 'reason': "i'm not 100% sure what is going on in the photo but it must be big given the heavy police presence and what I think is a stretcher. This makes me feel like another big shooting went on but i don't know where it is so it's concerning and scary that it happened aga…
249	Guns allowed on campus leads prof to cancel office hours, declare I no longer feel safe : student	anonymous-source/all_shooting_images_newest/335.jpg	[{'emotion': 'Fear', 'intensity': '4', 'reason': 'why he is carrying a gun at what looks like a dinner'}, {'emotion': 'Fear', 'intensity': '4', 'reason': "there doesn't seem to be a need for the gun and there are children. I don't understand why he's reaching for it but based on the news, it makes me feel like someone is going to die. "}, {'emotion': 'Fear', 'intensity': '4', 'reason': 'seems as …
252	Obama calls on Americans 'to fight the rise of anti-Semitism' after synagogue shooting	anonymous-source/all_shooting_images_newest/100452.jpg	[{'emotion': 'Sadness', 'intensity': '4', 'reason': 'miss Obama '}, {'emotion': 'Sadness', 'intensity': '1', 'reason': "this makes me feel like something bad just happened and he's holding a sad press conference to talk about it and offer condolances. There is nothing in the image that hints that it could be positive news or anything light. "}, {'emotion': 'Fear', 'intensity': '2', 'reason': 'he …
255	How We Mourned' memorializes Las Vegas mass shooting	anonymous-source/all_shooting_images_newest/90038.jpg	[{'emotion': 'Sadness', 'intensity': '5', 'reason': 'that those people lost their lives'}, {'emotion': 'Sadness', 'intensity': '3', 'reason': "I feel bad for the victims. I'm sad that they lost their lives in such a horrible way. "}, {'emotion': 'Sadness', 'intensity': '5', 'reason': 'so many people lost their lives for no reason'}, {'emotion': 'Sadness', 'intensity': '2', 'reason': 'Many people …
260	Lakers will honor victims of Thousand Oaks shooting at next home game	anonymous-source/all_shooting_images_newest/110373.jpg	[{'emotion': 'Sadness', 'intensity': '3', 'reason': 'The man is crying'}, {'emotion': 'Sadness', 'intensity': '5', 'reason': 'Sadness\r\n'}, {'emotion': 'Sadness', 'intensity': '4', 'reason': 'I feel bad for these people who have clearly suffered a loss'}, {'emotion': 'Sadness', 'intensity': '3', 'reason': "Gun violence is a huge issue in our society and it's sad to see so many people affected du…
263	Judge blocks release of 3D-printed gun plans one day after Jacksonville Madden shooting	anonymous-source/all_shooting_images_newest/162.jpg	[{'emotion': 'Fear', 'intensity': '5', 'reason': "It's a gun"}, {'emotion': 'Fear', 'intensity': '4', 'reason': 'Fear\r\n'}, {'emotion': 'Fear', 'intensity': '3', 'reason': 'I worry that this is some sort of method of concealing a weapon'}, {'emotion': 'Contentment', 'intensity': '3', 'reason': 'dont have enough context for this'}, {'emotion': 'Fear', 'intensity': '4', 'reason': 'I am afraid of a…
266	Jacksonville councilman on shooting: We've got a problem with guns and faith	anonymous-source/all_shooting_images_newest/412.jpg	[{'emotion': 'Fear', 'intensity': '1', 'reason': "not sure what's going on"}, {'emotion': 'Fear', 'intensity': '4', 'reason': 'Fear\r\n'}, {'emotion': 'Anger', 'intensity': '3', 'reason': 'I am upset to see a crime like this occur'}, {'emotion': 'Fear', 'intensity': '3', 'reason': 'it makes me realise that I can be a target to gun violence too '}, {'emotion': 'Sadness', 'intensity': '4', 'reason'…
269	Michigan man gets up to 10 years in prison for shooting at black teen asking for directions | TheHill	anonymous-source/all_shooting_images_newest/110094.jpg	[{'emotion': 'Fear', 'intensity': '3', 'reason': "Not sure what's going on"}, {'emotion': 'Contentment', 'intensity': '3', 'reason': 'Contentment\r\n'}, {'emotion': 'Fear', 'intensity': '3', 'reason': "I am worried about the safety of this man's neighbors"}, {'emotion': 'Contentment', 'intensity': '3', 'reason': 'dont have context '}, {'emotion': 'Fear', 'intensity': '3', 'reason': 'I am afraid t…
273	Breaking: Judge issues big decision on 3D printed guns hours before midnight deadline	anonymous-source/all_shooting_images_newest/171.jpg	[{'emotion': 'Fear', 'intensity': '5', 'reason': 'Guns are scary'}, {'emotion': 'Anger', 'intensity': '3', 'reason': 'Anger\r\n'}, {'emotion': 'Fear', 'intensity': '1', 'reason': "I am not exactly sure what I'm looking at and I worry about what is being done with the gun"}, {'emotion': 'Contentment', 'intensity': '3', 'reason': 'dont have context '}, {'emotion': 'Fear', 'intensity': '3', 'reason'…
275	Parkland survivors keep memory of shooting alive	anonymous-source/all_shooting_images_newest/10004.jpg	[{'emotion': 'Sadness', 'intensity': '4', 'reason': 'Someone had died at that school. It is heartbreaking'}, {'emotion': 'Sadness', 'intensity': '4', 'reason': 'Sadness\r\n'}, {'emotion': 'Sadness', 'intensity': '3', 'reason': 'I feel bad for the victims and loved ones'}, {'emotion': 'Sadness', 'intensity': '4', 'reason': "it's sad to see people be affected due to this"}, {'emotion': 'Sadness', '…
276	Shooting at Jacksonville Videogame Event Puts Focus on Security	anonymous-source/all_shooting_images_newest/434.jpg	[{'emotion': 'Fear', 'intensity': '3', 'reason': 'A police officer is out and about on patrol'}, {'emotion': 'Fear', 'intensity': '3', 'reason': 'Fear\r\n'}, {'emotion': 'Fear', 'intensity': '2', 'reason': 'I am worried about what has happened at this scene'}, {'emotion': 'Contentment', 'intensity': '3', 'reason': 'dont have context'}, {'emotion': 'Sadness', 'intensity': '3', 'reason': 'police ta…
280	Giffords, Nevada Democrats meet 1 year after Vegas shooting	anonymous-source/all_shooting_images_newest/100174.jpg	[{'emotion': 'Sadness', 'intensity': '2', 'reason': "A lover's sad expression makes me vague and sad."}, {'emotion': 'Sadness', 'intensity': '3', 'reason': 'it seems like they are mourning '}, {'emotion': 'Sadness', 'intensity': '5', 'reason': 'It seems that the couple is mourning the victim of gun violence'}, {'emotion': 'Fear', 'intensity': '3', 'reason': 'thy are so sad'}, {'emotion': 'Sadness…
283	Pittsburgh shooting suspect said he wanted all Jews to die: police	anonymous-source/all_shooting_images_newest/100451.jpg	[{'emotion': 'Fear', 'intensity': '4', 'reason': 'The polices in the picture look very serious and it makes me scary because something bad and serious is happening.'}, {'emotion': 'Sadness', 'intensity': '3', 'reason': 'the police need to do better'}, {'emotion': 'Sadness', 'intensity': '5', 'reason': 'This scene indicates that there was a gun violence incident happened in this building'}, {'emot…
284	A suggestion for groups supporting gun control: Get your act together	anonymous-source/all_shooting_images_newest/10723.jpg	[{'emotion': 'Awe', 'intensity': '4', 'reason': 'The overall atmosphere and the guns in the picture make the whole thing heavy. However, it also raises questions about where the guns are and why they are displayed there.'}, {'emotion': 'Fear', 'intensity': '3', 'reason': 'guns are becoming common in the country'}, {'emotion': 'Fear', 'intensity': '4', 'reason': 'Though the guns are not pointing t…
285	Hillary Clinton, gun-control groups, lawmakers unite on fundraiser for 'NR8' candidates	anonymous-source/all_shooting_images_newest/90202.jpg	[{'emotion': 'Sadness', 'intensity': '5', 'reason': 'It saddens me to see the students passionately fighting for the safety of their school. '}, {'emotion': 'Sadness', 'intensity': '3', 'reason': 'children have to protest when adults should do better\r\n'}, {'emotion': 'Awe', 'intensity': '5', 'reason': 'They are brave and try to fight against the NRA to create a peaceful future.'}, {'emotion': '…
288	Florida Police Issued An Arrest Warrant For A White Man Who Pulled A Gun On Black College Students	anonymous-source/all_shooting_images_newest/90095.jpg	[{'emotion': 'Fear', 'intensity': '4', 'reason': 'The man in the photo looks very menacing, and it scares me.'}, {'emotion': 'Fear', 'intensity': '3', 'reason': 'it seems like a confrontation\r\n'}, {'emotion': 'Sadness', 'intensity': '1', 'reason': 'Who is he, how does he relate to gun violence?'}, {'emotion': 'Excitement', 'intensity': '3', 'reason': 'WORLDSTAR'}, {'emotion': 'Fear', 'intensity…
289	Man found guilty of firing gun at black teen who knocked on his door to ask for directions	anonymous-source/all_shooting_images_newest/100160.jpg	[{'emotion': 'Sadness', 'intensity': '3', 'reason': 'The atmosphere in the photo itself makes him look like a criminal, but his sad eyes make me question about that.'}, {'emotion': 'Fear', 'intensity': '3', 'reason': 'I do not understand the context\r\n'}, {'emotion': 'Fear', 'intensity': '4', 'reason': "It looks like that he is the gunner in some incidents, however, I don't know the exact identi…
290	Looking back at the Las Vegas mass shooting Photos	anonymous-source/all_shooting_images_newest/100284.jpg	[{'emotion': 'Sadness', 'intensity': '4', 'reason': 'The empty eyes and dirty clothes of the woman in the photo make me predict how difficult it must have been for her. And the ambulance in the back makes the situation even more dramatic.'}, {'emotion': 'Sadness', 'intensity': '3', 'reason': 'the image shows desperation to me'}, {'emotion': 'Sadness', 'intensity': '5', 'reason': 'Apparently, this…
300	Tense moments as community meets after funeral ambush: 'Your church has had many shootings'	anonymous-source/all_shooting_images_newest/100135.jpg	[{'emotion': 'Sadness', 'intensity': '2', 'reason': 'I feel sad because the expressions on their face look quite distressing and defeated. They may have been affected by gun violence and are processing that which makes me feel for them. '}, {'emotion': 'Sadness', 'intensity': '3', 'reason': "I'm not sure what is happening in the photo."}, {'emotion': 'Sadness', 'intensity': '3', 'reason': 'someon…
302	California governor signs gun control bills into law	anonymous-source/all_shooting_images_newest/90335.jpg	[{'emotion': 'Contentment', 'intensity': '2', 'reason': 'I feel pretty neutral, not sure if the man looks is giving a speech to stop gun violence. '}, {'emotion': 'Sadness', 'intensity': '3', 'reason': "I'm not sure who this is."}, {'emotion': 'Contentment', 'intensity': '3', 'reason': 'the possibility of justice being served'}, {'emotion': 'Contentment', 'intensity': '1', 'reason': "I'm not real…
303	NYPD deploys officers to religious centers after Pittsburgh shooting	anonymous-source/all_shooting_images_newest/100420.jpg	[{'emotion': 'Sadness', 'intensity': '2', 'reason': 'I have lived in NYC and the NYPD has always seemed like they are there to protect citizens, however sometimes cops can be out of line and morally corrupt. Not sure if they are there to stop gun violence or have used their guns. '}, {'emotion': 'Sadness', 'intensity': '3', 'reason': "I'm not sure what is happening in this photo."}, {'emotion': '…
306	Thousand Oaks shooter is the textbook example of white privilege	anonymous-source/all_shooting_images_newest/110515.jpg	[{'emotion': 'Sadness', 'intensity': '4', 'reason': 'I feel sad because this looks like some sort of memorial which means someone died. No one wants to see kids hurting and upset so of course it brings an inner sadness. '}, {'emotion': 'Sadness', 'intensity': '3', 'reason': 'It looks like a memorial, which makes me sad.'}, {'emotion': 'Sadness', 'intensity': '3', 'reason': 'the possible loss of i…
308	White man who harassed black students with gun in viral video charged	anonymous-source/all_shooting_images_newest/90079.jpg	[{'emotion': 'Sadness', 'intensity': '2', 'reason': "This image stirs up emotions of confusion because I'm not sure if the Caucasian male is yelling at the other man in the image. "}, {'emotion': 'Sadness', 'intensity': '3', 'reason': "I'm not sure who this is."}, {'emotion': 'Fear', 'intensity': '3', 'reason': 'someone suspicious who carries with him an ominous vibe'}, {'emotion': 'Disgust', 'in…
309	Survivor claims Kentucky shooter spared his life, told him 'whites don't kill whites'	anonymous-source/all_shooting_images_newest/100099.jpg	[{'emotion': 'Fear', 'intensity': '4', 'reason': 'I have no idea who this man is but the image makes me feel fearful. He looks like he is in prison which is scary especially if involved with gun violence. '}, {'emotion': 'Sadness', 'intensity': '3', 'reason': "I'm not sure who this is."}, {'emotion': 'Anger', 'intensity': '3', 'reason': 'a perpetrator'}, {'emotion': 'Disgust', 'intensity': '4', '…
310	Pittsburgh synagogue shooting suspect threatened Jewish groups, pushed migrant caravan conspiracies	anonymous-source/all_shooting_images_newest/100147.jpg	[{'emotion': 'Contentment', 'intensity': '1', 'reason': 'This image makes me feel contentment, he looks like an old man in the crowd so I feel neutral.'}, {'emotion': 'Sadness', 'intensity': '3', 'reason': "I'm not sure who this is in the photo."}, {'emotion': 'Sadness', 'intensity': '3', 'reason': 'the possible loss of innocent lives'}, {'emotion': 'Sadness', 'intensity': '1', 'reason': "I'm not…
314	Trump Gun Slump: Sales Plummet As Americans Don't Buy Gun Control Threats	anonymous-source/all_shooting_images_newest/10714.jpg	[{'emotion': 'Fear', 'intensity': '4', 'reason': 'Not used to being around guns so seeing so many makes me fearful if they get into the wrong hands or are used for sheer violence.'}, {'emotion': 'Sadness', 'intensity': '3', 'reason': 'Seeing photos of guns after hearing of gun violence makes me sad.'}, {'emotion': 'Anger', 'intensity': '3', 'reason': 'irresponsible people handling guns'}, {'emoti…
318	Arrest warrant issued for white man who pulled gun on black students in viral video	anonymous-source/all_shooting_images_newest/90086.jpg	[{'emotion': 'Fear', 'intensity': '2', 'reason': " This time I noticed the caucasians man's hat which brought a sense of fear out of me for the other man in the elevator. Anyone who needs to publicize they like guns makes me fearful."}, {'emotion': 'Sadness', 'intensity': '3', 'reason': "I'm not sure who this is in the photo."}, {'emotion': 'Fear', 'intensity': '3', 'reason': 'someone who looks m…
320	Teen hailed as hero for reporting classmate with gun and preventing possible school shooting	anonymous-source/all_shooting_images_newest/110409.jpg	[{'emotion': 'Fear', 'intensity': '2', 'reason': 'It is dangerous.'}, {'emotion': 'Fear', 'intensity': '5', 'reason': "When seeing a gun in this picture, I feel uncomfortable. And I'm worried whether the person will do something to hurt others."}, {'emotion': 'Disgust', 'intensity': '4', 'reason': "I don't think that is the proper way to carry a gun and it seems like the gun is at the ready to hu…
325	Republican who called Florida shooting survivor a 'skinhead lesbian' quits Maine race	anonymous-source/all_shooting_images_newest/10514.jpg	[{'emotion': 'Sadness', 'intensity': '3', 'reason': 'I can sympathize with the people about the aftermath due to the gun violence.'}, {'emotion': 'Sadness', 'intensity': '3', 'reason': 'The woman looks sad. Maybe she loses her friends or family because of gun violence. Everyone is hurt by gun violence is sympathetic.'}, {'emotion': 'Sadness', 'intensity': '2', 'reason': 'I recognize the person an…
326	The deadly peril of not enforcing gun laws	anonymous-source/all_shooting_images_newest/100399.jpg	[{'emotion': 'Sadness', 'intensity': '3', 'reason': 'I can sympathize with the people about the aftermath due to the gun violence.'}, {'emotion': 'Sadness', 'intensity': '4', 'reason': 'I feel very sad when seeing someone loses his or her life because of gun violence.'}, {'emotion': 'Sadness', 'intensity': '3', 'reason': 'I assume the person in the casket died from gun violence.'}, {'emotion': 'S…
327	Alabama elementary school student brings gun to school, shoots himself in hand: police	anonymous-source/all_shooting_images_newest/90146.jpg	[{'emotion': 'Fear', 'intensity': '3', 'reason': 'people feel uncertain about the gun situation.'}, {'emotion': 'Fear', 'intensity': '1', 'reason': "I don't know what happened on the school in the picture. But it looks so quiet, so I'm worried about children here."}, {'emotion': 'Fear', 'intensity': '3', 'reason': 'the images evoke feelings of abandonment and desertion, like the school is unprote…
328	Don Lemon on Fla. shooting: This is a sickness that has infected this country	anonymous-source/all_shooting_images_newest/10832.jpg	[{'emotion': 'Sadness', 'intensity': '3', 'reason': 'I can sympathize with the people about the aftermath due to the gun violence.'}, {'emotion': 'Sadness', 'intensity': '4', 'reason': 'I feel very sad when seeing someone loses his or her life because of gun violence.'}, {'emotion': 'Sadness', 'intensity': '2', 'reason': 'these news stories feel repetitive and it feels like no one is doing anythi…
329	Central Michigan University officers had multiple run ins with shooting suspect	anonymous-source/all_shooting_images_newest/10646.jpg	[{'emotion': 'Disgust', 'intensity': '3', 'reason': 'I feel like he is the criminal.'}, {'emotion': 'Fear', 'intensity': '3', 'reason': 'The man in the picture looks fierce and dissatisfied with society.'}, {'emotion': 'Sadness', 'intensity': '3', 'reason': 'this man commited gun violence and was kid. I wonder what drove him to commit those acts.'}, {'emotion': 'Sadness', 'intensity': '5', 'reaso…
330	Gaming community and friends mourn Jacksonville shooting victims	anonymous-source/all_shooting_images_newest/112.jpg	[{'emotion': 'Disgust', 'intensity': '3', 'reason': 'I feel like they are the criminals.'}, {'emotion': 'Sadness', 'intensity': '2', 'reason': 'I feel very sad when seeing someone loses his or her life because of gun violence.'}, {'emotion': 'Sadness', 'intensity': '4', 'reason': "the images presented are victims of gun violence. These people were also children who's lives were taken too early."}…
331	Trump visits Florida hospital after school shooting	anonymous-source/all_shooting_images_newest/10343.jpg	[{'emotion': 'Anger', 'intensity': '4', 'reason': "I don't believe politicians about gun control."}, {'emotion': 'Disgust', 'intensity': '2', 'reason': "Trump looks just like a politician, he totally doesn't care about gun violence in this country."}, {'emotion': 'Sadness', 'intensity': '1', 'reason': "I feel like Trump didn't do enough to stop gun violence."}, {'emotion': 'Anger', 'intensity': '…
334	Supreme Court rebuffs challenge to California gun restrictions	anonymous-source/all_shooting_images_newest/110069.jpg	[{'emotion': 'Fear', 'intensity': '3', 'reason': 'people feel uncertain about the gun situation.'}, {'emotion': 'Fear', 'intensity': '5', 'reason': 'There are too many guns in the picture. I just can relate them to some bad things.'}, {'emotion': 'Fear', 'intensity': '2', 'reason': "that's a lot of guns."}, {'emotion': 'Anger', 'intensity': '4', 'reason': 'guns hurt people '}, {'emotion': 'Fear',…
336	Police: Pittsburgh synagogue gunman said 'I just want to kill Jews'	anonymous-source/all_shooting_images_newest/100401.jpg	[{'emotion': 'Sadness', 'intensity': '4', 'reason': 'I can sympathize with the people about the aftermath due to the gun violence.'}, {'emotion': 'Sadness', 'intensity': '5', 'reason': 'I feel very sad when seeing someone loses his or her life because of gun violence.'}, {'emotion': 'Sadness', 'intensity': '4', 'reason': 'vigils are sad and people mourning is sad.'}, {'emotion': 'Sadness', 'inten…
337	Parkland survivor details her experience during shooting at Kavanaugh hearing	anonymous-source/all_shooting_images_newest/90149.jpg	[{'emotion': 'Fear', 'intensity': '3', 'reason': 'people feel uncertain about the gun situation.'}, {'emotion': 'Sadness', 'intensity': '3', 'reason': 'I feel very sad when seeing gun violence happened in a school.'}, {'emotion': 'Sadness', 'intensity': '2', 'reason': 'that is a school that had gun violence.'}, {'emotion': 'Sadness', 'intensity': '4', 'reason': 'the site of another mass shooting …
339	Exclusive: Group chat messages show school shooter obsessed with race, violence and guns	anonymous-source/all_shooting_images_newest/10156.jpg	[{'emotion': 'Fear', 'intensity': '4', 'reason': 'he is a stereotypical school shooter archetype in my head. '}, {'emotion': 'Disgust', 'intensity': '4', 'reason': "I don't feel comfortable with people wearing bulletproof vests or other armed equipment in normal life. "}, {'emotion': 'Disgust', 'intensity': '5', 'reason': 'he seems to be one of the killers '}, {'emotion': 'Disgust', 'intensity': …
340	Does President Trump really not know why shootings in our country occur?	anonymous-source/all_shooting_images_newest/90243.jpg	[{'emotion': 'Anger', 'intensity': '2', 'reason': 'guns are inherently violent. '}, {'emotion': 'Anger', 'intensity': '5', 'reason': 'If criminal suspects are the person in this kind of picture, it will make me feel that they are ready to start conflicts and hurt others.'}, {'emotion': 'Fear', 'intensity': '5', 'reason': 'something bad might happen in the future and he seems like the murderer'}, …
342	Rudy Giuliani tweets about Chicago gun violence, praises Garry McCarthy but calls him 'Jerry'	anonymous-source/all_shooting_images_newest/306.jpg	[{'emotion': 'Amusement', 'intensity': '1', 'reason': "I don't know who this man is. "}, {'emotion': 'Sadness', 'intensity': '3', 'reason': "I don't know who he is, but through his body language and his emotional express, I think he has some very important things need to announce. "}, {'emotion': 'Sadness', 'intensity': '3', 'reason': 'something bad might have happened to his family '}, {'emotion…
343	Florida lawmakers pass bill that would allow school staff to carry guns	anonymous-source/all_shooting_images_newest/10093.jpg	[{'emotion': 'Anger', 'intensity': '4', 'reason': "school shouldn't be a place for police officers. "}, {'emotion': 'Sadness', 'intensity': '3', 'reason': 'When a large group of police comes to the area, where I guess is a high school. I feel kids are not 100% protectable. '}, {'emotion': 'Fear', 'intensity': '5', 'reason': 'gun violence is still a thing here '}, {'emotion': 'Fear', 'intensity': …
344	California already had the strictest gun control laws in the nation. They just passed a bunch more	anonymous-source/all_shooting_images_newest/100027.jpg	[{'emotion': 'Fear', 'intensity': '2', 'reason': 'the gun industry is so under-regulated. '}, {'emotion': 'Contentment', 'intensity': '3', 'reason': 'These guns are well kept, and the manufacturer and serial number can be queried.'}, {'emotion': 'Fear', 'intensity': '3', 'reason': 'why are people still selling guns '}, {'emotion': 'Fear', 'intensity': '4', 'reason': 'guns scare me'}, {'emotion': …
346	Synagogue shooting suspect appears in court as Pittsburgh prepares for Trump's visit	anonymous-source/all_shooting_images_newest/100320.jpg	[{'emotion': 'Sadness', 'intensity': '4', 'reason': 'so many people have died and these people are grieving. '}, {'emotion': 'Sadness', 'intensity': '5', 'reason': 'They are praying for the victims.'}, {'emotion': 'Sadness', 'intensity': '4', 'reason': 'someone may died because of gun violence '}, {'emotion': 'Sadness', 'intensity': '5', 'reason': "for people that lost their loved ones because of…
348	Guns alone don't kill people, patriarchy kills people	anonymous-source/all_shooting_images_newest/10675.jpg	[{'emotion': 'Sadness', 'intensity': '2', 'reason': 'people think that gun violence is only perpetrated by certain races/ ethnicities. '}, {'emotion': 'Fear', 'intensity': '3', 'reason': "I don't know who he is, but his tattoo cannot give me the trust feelings when gun violence happens. "}, {'emotion': 'Fear', 'intensity': '4', 'reason': 'he is definitely one of the murderers'}, {'emotion': 'Fear…
353	Nashville mayor demands stricter gun control after Waffle House shooting	anonymous-source/all_shooting_images_newest/10122.jpg	[{'emotion': 'Sadness', 'intensity': '2', 'reason': 'its clear that something violent happened here. '}, {'emotion': 'Sadness', 'intensity': '5', 'reason': 'This is the crime scene'}, {'emotion': 'Fear', 'intensity': '5', 'reason': 'seems like someone got shot here'}, {'emotion': 'Fear', 'intensity': '5', 'reason': 'it looks like the scene of a mass shooting so it makes me feel sad and angry beca…
354	Illinois superintendent becomes police officer so she can carry a gun in her school	anonymous-source/all_shooting_images_newest/100035.jpg	[{'emotion': 'Anger', 'intensity': '2', 'reason': 'that is a lot of guns. '}, {'emotion': 'Amusement', 'intensity': '3', 'reason': 'criminal evidence maybe'}, {'emotion': 'Disgust', 'intensity': '4', 'reason': 'people are still selling guns '}, {'emotion': 'Fear', 'intensity': '5', 'reason': 'guns scare me'}, {'emotion': 'Fear', 'intensity': '4', 'reason': "I'm scared of being shot and these are …
356	Doctors release new recommendations to reduce gun violence	anonymous-source/all_shooting_images_newest/100330.jpg	[{'emotion': 'Sadness', 'intensity': '4', 'reason': 'they are mourning. '}, {'emotion': 'Sadness', 'intensity': '3', 'reason': 'People are praying'}, {'emotion': 'Sadness', 'intensity': '5', 'reason': 'someone died '}, {'emotion': 'Sadness', 'intensity': '4', 'reason': "for people that lost their loved ones because of the guns' use"}, {'emotion': 'Sadness', 'intensity': '3', 'reason': 'This pictu…
360	Trump's 'Angel Families' weaponize their grief to demonize immigrants	anonymous-source/all_shooting_images_newest/10009.jpg	[{'emotion': 'Sadness', 'intensity': '3', 'reason': "There's certainly a girl killed by gun violence and it is sad for me."}, {'emotion': 'Sadness', 'intensity': '3', 'reason': 'Although they are honoring victims of gun violence, policies have not been changed and that is very disappointing, scary and sad '}, {'emotion': 'Sadness', 'intensity': '3', 'reason': 'losing family'}, {'emotion': 'Anger'…
361	PM won't tell Trump what to do on guns	anonymous-source/all_shooting_images_newest/10793.jpg	[{'emotion': 'Excitement', 'intensity': '4', 'reason': 'This looks like a protest or events for gun violence.'}, {'emotion': 'Contentment', 'intensity': '1', 'reason': 'I am not sure how to feel about this image given the context of gun violence'}, {'emotion': 'Contentment', 'intensity': '3', 'reason': 'smile'}, {'emotion': 'Contentment', 'intensity': '1', 'reason': 'this photo doesn’t give me an…
363	Brady Center launches new campaign to help keep kids safe from guns at home Video	anonymous-source/all_shooting_images_newest/241.jpg	[{'emotion': 'Sadness', 'intensity': '4', 'reason': 'I feel sad since the image reminds me how gun violence could affect children and teenagers.'}, {'emotion': 'Fear', 'intensity': '4', 'reason': 'The exposure kids have to guns in the U.S. is terrifying. Guns are easy to find '}, {'emotion': 'Fear', 'intensity': '3', 'reason': 'danger'}, {'emotion': 'Anger', 'intensity': '5', 'reason': 'no weapon…
365	Guns found at 2 schools, threats reported at 3 schools near Santa Fe High School on 1st day back after mass shooting	anonymous-source/all_shooting_images_newest/10157.jpg	[{'emotion': 'Anger', 'intensity': '4', 'reason': 'It shows how gun violence hurt children and students, and people who shoot in school area makes me even more angry.'}, {'emotion': 'Anger', 'intensity': '4', 'reason': "above is a visual representation of the horrors of lack of gun control. It makes me angry that there are so many photos like these and the government still won't fix policies to h…
375	Teens raised on lockdown drills feel the weight of the Florida shooting	anonymous-source/all_shooting_images_newest/10165.jpg	[{'emotion': 'Anger', 'intensity': '4', 'reason': "The content in the image shows people's worry and anger toward gun violence, and the words they use made me feel their desperate. "}, {'emotion': 'Sadness', 'intensity': '5', 'reason': 'this quote holds so much emotion. The first two paragraphs are sad, they demonstrate fear, sadness, and loss. But the last is inspiring, the line "to live is to f…
376	Maryland drugstore shooter was diagnosed with mental illness but legally owned gun, sheriff says	anonymous-source/all_shooting_images_newest/90330.jpg	[{'emotion': 'Sadness', 'intensity': '3', 'reason': "Seems there's a gunshot happened in this area, and I usually feel worried and fear when seeing acertain scenes."}, {'emotion': 'Sadness', 'intensity': '4', 'reason': 'it can be assumed through the context of gun violence that there was just a mass shooting which is devastating '}, {'emotion': 'Fear', 'intensity': '3', 'reason': 'accident place'…
379	Police Issue Arrest Warrant For White Man Who Pulled Gun on Four Black College Students in Viral Video	anonymous-source/all_shooting_images_newest/90288.jpg	[{'emotion': 'Fear', 'intensity': '5', 'reason': 'Since people in the picture are talking about a video of a man, it seems like he is being dangerous or weird. That makes me scared but also wondering about what he is doing. '}, {'emotion': 'Anger', 'intensity': '5', 'reason': 'I feel anger at people that use guns to harm people'}, {'emotion': 'Fear', 'intensity': '1', 'reason': 'It is not somethi…
383	Therapy dogs visit Pittsburgh neighborhood after shooting	anonymous-source/all_shooting_images_newest/100242.jpg	[{'emotion': 'Awe', 'intensity': '3', 'reason': "I don't know why the police came, and what is that building, but since the police are here, there might be something dangerous. "}, {'emotion': 'Sadness', 'intensity': '4', 'reason': 'I feel fear at people that use guns to harm people'}, {'emotion': 'Fear', 'intensity': '4', 'reason': 'There is a gun showing.'}, {'emotion': 'Disgust', 'intensity': …
384	Gun owners support a wide range of gun control measures, Johns Hopkins study finds	anonymous-source/all_shooting_images_newest/10434.jpg	[{'emotion': 'Fear', 'intensity': '4', 'reason': 'Unlike other small guns, the guns in the picture look really dangerous, which makes me scared. '}, {'emotion': 'Fear', 'intensity': '5', 'reason': 'I feel fear at people that use guns to harm people'}, {'emotion': 'Fear', 'intensity': '5', 'reason': 'Too much guns '}, {'emotion': 'Disgust', 'intensity': '5', 'reason': "I can't wrap my head, and un…
385	Protests staged for gun control, gun rights outside NRA meeting	anonymous-source/all_shooting_images_newest/10760.jpg	[{'emotion': 'Excitement', 'intensity': '4', 'reason': 'Students are protesting their rights to be safe in the school with enthusiasm. Their enthusiasm makes me excited, but also sad and angry because some incidents might led them to protest. '}, {'emotion': 'Excitement', 'intensity': '5', 'reason': 'I feel joy that people want to end gun violence'}, {'emotion': 'Excitement', 'intensity': '4', 'r…
386	Official: Shooter debated sanity online during bar massacre	anonymous-source/all_shooting_images_newest/110274.jpg	[{'emotion': 'Sadness', 'intensity': '4', 'reason': "The candles and the woman's sad eyes make me become emotional and feel sadness."}, {'emotion': 'Sadness', 'intensity': '5', 'reason': 'I feel sad for people that are harmed by guns'}, {'emotion': 'Sadness', 'intensity': '4', 'reason': 'people are dying because of gun violence '}, {'emotion': 'Sadness', 'intensity': '5', 'reason': "It's so unfor…
394	Big Investors Have Clout. They Can Use It With Gun Makers.	anonymous-source/all_shooting_images_newest/10445.jpg	[{'emotion': 'Awe', 'intensity': '3', 'reason': "At this point, I don't feel fear about the guns because I watched the gun pictures for several times."}, {'emotion': 'Fear', 'intensity': '4', 'reason': 'I feel fear at people that use guns to harm people'}, {'emotion': 'Fear', 'intensity': '4', 'reason': 'Too many guns '}, {'emotion': 'Disgust', 'intensity': '5', 'reason': 'What is the obsession w…
396	This is my highway': Doctors challenge NRA after Chicago hospital shooting	anonymous-source/all_shooting_images_newest/110306.jpg	[{'emotion': 'Sadness', 'intensity': '4', 'reason': 'The dolls and heart shape make me sad. It makes me even sadder because it seems to be honoring young children.'}, {'emotion': 'Sadness', 'intensity': '5', 'reason': 'I feel sad for people that are harmed by guns'}, {'emotion': 'Sadness', 'intensity': '4', 'reason': 'Children are dying because of gun '}, {'emotion': 'Sadness', 'intensity': '4', …
397	These 3,100 businesses love the NRA even as others pull back	anonymous-source/all_shooting_images_newest/10711.jpg	[{'emotion': 'Excitement', 'intensity': '3', 'reason': 'NRA is the association that restricts guns. Therefore, I feel excited and look forward to seeing what they will show us in the future.'}, {'emotion': 'Anger', 'intensity': '5', 'reason': 'I feel sad about people that do not take gun violence seriously'}, {'emotion': 'Sadness', 'intensity': '4', 'reason': "I don't know what this represents"},…
399	Courts in three states bar release of 3D-printable gun blueprints	anonymous-source/all_shooting_images_newest/212.jpg	[{'emotion': 'Fear', 'intensity': '3', 'reason': 'Fear because of the gun'}, {'emotion': 'Contentment', 'intensity': '3', 'reason': "It's a gun with a portable case. "}, {'emotion': 'Fear', 'intensity': '4', 'reason': "The gun held in the man's hand looks like a toy, but it is a real lethal weapon. It makes me feel fear."}, {'emotion': 'Awe', 'intensity': '3', 'reason': "I mean it's still easier …
403	Illegal immigrant charged with gun possession tries to claim Second Amendment rights in court	anonymous-source/all_shooting_images_newest/480.jpg	[{'emotion': 'Fear', 'intensity': '3', 'reason': 'Because guns = violence '}, {'emotion': 'Anger', 'intensity': '3', 'reason': 'those guns may be evidence of the crime. '}, {'emotion': 'Fear', 'intensity': '5', 'reason': 'The pistols are making me feel pressured'}, {'emotion': 'Fear', 'intensity': '1', 'reason': 'I have seen guns before'}, {'emotion': 'Fear', 'intensity': '3', 'reason': 'It makes…
405	NPR: More than two-thirds of school shootings reported to feds in 2015-16 never happened	anonymous-source/all_shooting_images_newest/25.jpg	[{'emotion': 'Contentment', 'intensity': '3', 'reason': 'I feel content because they are fighting against gun violence '}, {'emotion': 'Sadness', 'intensity': '3', 'reason': 'These shoes may represent serval people, which is a memory ceremony in front of government houses. '}, {'emotion': 'Excitement', 'intensity': '4', 'reason': 'There are a lot of people who want to fight for the anti-gun polic…
408	Country music awards honor shooting victims but leave politics out	anonymous-source/all_shooting_images_newest/110074.jpg	[{'emotion': 'Amusement', 'intensity': '3', 'reason': 'Singing for joy'}, {'emotion': 'Sadness', 'intensity': '3', 'reason': "It's a performance show. "}, {'emotion': 'Sadness', 'intensity': '1', 'reason': "I don't know who the lady is and how she relates to the gun violence"}, {'emotion': 'Sadness', 'intensity': '1', 'reason': 'Again, I must have missed this event'}, {'emotion': 'Awe', 'intensit…
409	Company selling 3D-printed gun blueprints online despite court injunction	anonymous-source/all_shooting_images_newest/214.jpg	[{'emotion': 'Fear', 'intensity': '3', 'reason': 'guns = violence '}, {'emotion': 'Excitement', 'intensity': '3', 'reason': "this man is showing the gun in portable case, it's safe."}, {'emotion': 'Fear', 'intensity': '4', 'reason': "The gun held in the man's hand looks like a toy, but it is a real lethal weapon. It makes me feel fear."}, {'emotion': 'Awe', 'intensity': '1', 'reason': 'This is ba…
413	3-D printed gun blueprints for sale after U.S. court order, group says	anonymous-source/all_shooting_images_newest/487.jpg	[{'emotion': 'Fear', 'intensity': '3', 'reason': 'guns = violence '}, {'emotion': 'Excitement', 'intensity': '3', 'reason': 'Those are gun models, and they are not real guns. No dangerous. '}, {'emotion': 'Fear', 'intensity': '5', 'reason': 'These guns look like toys, but they are real lethal weapons. It makes me feel fear that many people might not know how deadly these "toys" are.'}, {'emotion'…
415	Kill Me, Parkland Shooting Suspect Said After Rampage	anonymous-source/all_shooting_images_newest/121.jpg	[{'emotion': 'Sadness', 'intensity': '3', 'reason': 'Sad for the deaths of young people'}, {'emotion': 'Sadness', 'intensity': '3', 'reason': 'This place must be a crime that happened, and people are giving their honor to memory the victim. '}, {'emotion': 'Sadness', 'intensity': '5', 'reason': 'The picture indicates that this high school might just experience a terrible gun violence incident.'},…
423	Gun maker American Outdoor Brands: We won't be pushed into 'politically motivated' actions	anonymous-source/all_shooting_images_newest/10852.jpg	[{'emotion': 'Fear', 'intensity': '3', 'reason': 'they are guns, even without magazines'}, {'emotion': 'Fear', 'intensity': '4', 'reason': 'guns are scary and that is a big gun'}, {'emotion': 'Sadness', 'intensity': '3', 'reason': 'because this is a weapon that could carry out a mass shooting '}, {'emotion': 'Disgust', 'intensity': '3', 'reason': 'these guns even have eyepieces.'}, {'emotion': 'A…
425	Pittsburgh leaders, residents split over President Trump s trip to synagogue shooting site	anonymous-source/all_shooting_images_newest/100088.jpg	[{'emotion': 'Sadness', 'intensity': '5', 'reason': 'people alive still have to live with the fact they their families were victims'}, {'emotion': 'Sadness', 'intensity': '5', 'reason': 'It is sad to see someone crying'}, {'emotion': 'Sadness', 'intensity': '5', 'reason': 'that picture is heartbreaking '}, {'emotion': 'Sadness', 'intensity': '3', 'reason': "people shouldn't have to mourn their lo…
426	Inoperable handgun found at Waukegan alternative school	anonymous-source/all_shooting_images_newest/10029.jpg	[{'emotion': 'Fear', 'intensity': '3', 'reason': 'it looks like an elementary school or a kindergarten. i really hope no gun violence took place here'}, {'emotion': 'Sadness', 'intensity': '4', 'reason': 'Gun violence affects kids of all ages and this school could be a victim'}, {'emotion': 'Fear', 'intensity': '5', 'reason': 'that little kids lives could be in danger because of guns'}, {'emotion…
429	Shopify bans sale of certain firearms, accessories	anonymous-source/all_shooting_images_newest/166.jpg	[{'emotion': 'Sadness', 'intensity': '3', 'reason': "guns and the country flag are always associated together, but they shouldn't be"}, {'emotion': 'Fear', 'intensity': '4', 'reason': 'guns are scary and those are big guns'}, {'emotion': 'Anger', 'intensity': '3', 'reason': 'guns like those are for sale'}, {'emotion': 'Disgust', 'intensity': '3', 'reason': 'these types of guns should not just be …
431	Sacha Baron Cohen pranks former Arizona sheriff Joe Arpaio into debating gun control with a Shopkins toy	anonymous-source/all_shooting_images_newest/199.jpg	[{'emotion': 'Amusement', 'intensity': '3', 'reason': "it looks like a comedy show so people wouldn't get shot here"}, {'emotion': 'Amusement', 'intensity': '2', 'reason': 'This looks like it could be a comedy show'}, {'emotion': 'Amusement', 'intensity': '5', 'reason': 'this is a smart and funny show and he made fun of gun supporters in this clip and made them look stupid'}, {'emotion': 'Disgust…
434	Advice from a survivor of the Florida school shooting: It's time to start ignoring Trump	anonymous-source/all_shooting_images_newest/10224.jpg	[{'emotion': 'Excitement', 'intensity': '3', 'reason': 'i support what they are pushing for'}, {'emotion': 'Sadness', 'intensity': '2', 'reason': 'She looks like she is going through something sad'}, {'emotion': 'Sadness', 'intensity': '4', 'reason': 'because she had to go through so much trauma '}, {'emotion': 'Awe', 'intensity': '3', 'reason': 'she is a Parkland survivor'}, {'emotion': 'Amuseme…
435	Pittsburgh synagogue-shooting suspect wheeled into courtroom; Trump to visit city Tuesday	anonymous-source/all_shooting_images_newest/100102.jpg	[{'emotion': 'Sadness', 'intensity': '3', 'reason': 'people died'}, {'emotion': 'Sadness', 'intensity': '5', 'reason': 'So many people lost their lives for no reason'}, {'emotion': 'Sadness', 'intensity': '4', 'reason': 'because those are people that died in a shooting '}, {'emotion': 'Sadness', 'intensity': '3', 'reason': 'of the death that came in a synagogue shooting'}, {'emotion': 'Sadness', …
439	Parkland School Shooting Suspect Nikolas Cruz Spotted Giggling, Laughing While in Jail, Observation Report Says	anonymous-source/all_shooting_images_newest/10255.jpg	[{'emotion': 'Fear', 'intensity': '3', 'reason': "I don't know the context of this picture."}, {'emotion': 'Fear', 'intensity': '3', 'reason': 'minors could inflict gun violence'}, {'emotion': 'Fear', 'intensity': '5', 'reason': 'he looks psychotic'}, {'emotion': 'Disgust', 'intensity': '5', 'reason': "I can't believe people like this exist"}, {'emotion': 'Disgust', 'intensity': '3', 'reason': 'a…
443	Authorities aware of suspected Capital Gazette shooter s threats, police chief says	anonymous-source/all_shooting_images_newest/10245.jpg	[{'emotion': 'Fear', 'intensity': '3', 'reason': "I don't know the context of this picture."}, {'emotion': 'Fear', 'intensity': '3', 'reason': 'law enforcement has not been protecting BIPOC communities'}, {'emotion': 'Excitement', 'intensity': '3', 'reason': "I'm curious about what happened"}, {'emotion': 'Excitement', 'intensity': '2', 'reason': 'I hope this is a constructive conversation, but s…
444	Authorities seize 111 illegally owned firearms in L.A. County sweep	anonymous-source/all_shooting_images_newest/100078.jpg	[{'emotion': 'Fear', 'intensity': '3', 'reason': "That's a lot of guns."}, {'emotion': 'Fear', 'intensity': '3', 'reason': 'deadly weapons can be accessed by people'}, {'emotion': 'Fear', 'intensity': '4', 'reason': "there are so many guns - I don't know how each of those guns will be used"}, {'emotion': 'Sadness', 'intensity': '2', 'reason': "That's a lot of potential dead people"}, {'emotion': …
446	8 men, 3 women killed in Pittsburgh synagogue shooting mourned	anonymous-source/all_shooting_images_newest/100333.jpg	[{'emotion': 'Sadness', 'intensity': '3', 'reason': 'These people look sad.'}, {'emotion': 'Sadness', 'intensity': '3', 'reason': 'people are facing consequences of gun violence'}, {'emotion': 'Sadness', 'intensity': '4', 'reason': 'they are celebrating and honoring the lives of the victims'}, {'emotion': 'Sadness', 'intensity': '4', 'reason': 'Vigils always hit in the feels, so many people lost …
450	Some gun-toting Texans embrace Democrat's call for tougher firearm laws	anonymous-source/all_shooting_images_newest/90427.jpg	[{'emotion': 'Sadness', 'intensity': '3', 'reason': 'This person looks sad.'}, {'emotion': 'Anger', 'intensity': '3', 'reason': 'guns have no place in peaceful society'}, {'emotion': 'Fear', 'intensity': '3', 'reason': "I don't know what that farmer/cowboy is capable of"}, {'emotion': 'Amusement', 'intensity': '2', 'reason': "I don't know what he's feeling emotional about"}, {'emotion': 'Fear', '…
451	Democrats want answers from Betsy DeVos on why school safety panel won't focus on guns	anonymous-source/all_shooting_images_newest/10301.jpg	[{'emotion': 'Fear', 'intensity': '3', 'reason': "I don't know the context of this picture."}, {'emotion': 'Amusement', 'intensity': '3', 'reason': 'I do not recognize the person'}, {'emotion': 'Contentment', 'intensity': '1', 'reason': "I don't know who she is"}, {'emotion': 'Disgust', 'intensity': '5', 'reason': 'This one is particularly horrible'}, {'emotion': 'Excitement', 'intensity': '3', '…
453	We in Congress should protect students from gun violence as well as we protect ourselves	anonymous-source/all_shooting_images_newest/10310.jpg	[{'emotion': 'Fear', 'intensity': '3', 'reason': 'Looks like something bad happened.'}, {'emotion': 'Sadness', 'intensity': '3', 'reason': 'law intervenes post violence and not to prevent it'}, {'emotion': 'Excitement', 'intensity': '3', 'reason': "I'm curious about what happened"}, {'emotion': 'Sadness', 'intensity': '5', 'reason': 'School shootings happen way too much here'}, {'emotion': 'Fear'…
456	Gun Violence and Pipe Bombs Jolt Voters as Election Season Ends. Again? One Asks.	anonymous-source/all_shooting_images_newest/100334.jpg	[{'emotion': 'Sadness', 'intensity': '3', 'reason': 'These people look sad.'}, {'emotion': 'Sadness', 'intensity': '3', 'reason': 'no one deserves to lose their life to gun'}, {'emotion': 'Sadness', 'intensity': '5', 'reason': 'they are honoring the lives of the victims'}, {'emotion': 'Sadness', 'intensity': '4', 'reason': 'Vigils are sad, and this is a good photograph'}, {'emotion': 'Sadness', '…
457	Education Department s proposals on guns in schools sparks outcry	anonymous-source/all_shooting_images_newest/243.jpg	[{'emotion': 'Sadness', 'intensity': '3', 'reason': 'Looks like something bad happened.'}, {'emotion': 'Contentment', 'intensity': '3', 'reason': "I'm hopeful young people would bring about change"}, {'emotion': 'Sadness', 'intensity': '4', 'reason': 'it seems like the high school students are evacuating '}, {'emotion': 'Sadness', 'intensity': '1', 'reason': "I don't know what's happening here"},…
459	Federal judge blocks release of blueprints for 3-D-printed guns	anonymous-source/all_shooting_images_newest/273.jpg	[{'emotion': 'Fear', 'intensity': '4', 'reason': 'fear but not too much fear, the look on his face is kind of funny though'}, {'emotion': 'Fear', 'intensity': '3', 'reason': "I don't understand why they are making guns more accessible?"}, {'emotion': 'Fear', 'intensity': '4', 'reason': "I don't know who he is aiming at"}, {'emotion': 'Sadness', 'intensity': '3', 'reason': 'If that is a 3D printed…
463	Texas judge to roll out new plan aimed at getting more guns away from domestic violence offenders	anonymous-source/all_shooting_images_newest/488.jpg	[{'emotion': 'Fear', 'intensity': '2', 'reason': "guns don't usually bother me too much but they are very strange to stare at"}, {'emotion': 'Fear', 'intensity': '3', 'reason': "guns are somewhat scary but it's not a bit automatic rifle"}, {'emotion': 'Contentment', 'intensity': '1', 'reason': "it's just a gun - it isn't being used for anything - the fact that it's in a case makes it seem like it…
465	Florida school shooter heard voices telling him to kill	anonymous-source/all_shooting_images_newest/204.jpg	[{'emotion': 'Sadness', 'intensity': '4', 'reason': "I feel sad because she looks like she's mourning someone from gun violence"}, {'emotion': 'Sadness', 'intensity': '4', 'reason': "people shouldn't have to be mourning the loss of others like this"}, {'emotion': 'Sadness', 'intensity': '4', 'reason': 'she looks like she lost her loved one'}, {'emotion': 'Sadness', 'intensity': '3', 'reason': 'Be…
470	The 40 most breathtaking lines from Donald Trump's NRA speech	anonymous-source/all_shooting_images_newest/10085.jpg	[{'emotion': 'Fear', 'intensity': '1', 'reason': 'I know he protected our rights to bear arms but also could have done a lot more in background checks for people who wanted guns'}, {'emotion': 'Disgust', 'intensity': '4', 'reason': "He's already pretty bad but he's speaking at an NRA conference"}, {'emotion': 'Amusement', 'intensity': '4', 'reason': 'of his iconic hand gesture'}, {'emotion': 'Ang…
473	Planned shift on gun exports kicks up storm	anonymous-source/all_shooting_images_newest/10131.jpg	[{'emotion': 'Fear', 'intensity': '4', 'reason': "it's a very frightening piece of equipment "}, {'emotion': 'Fear', 'intensity': '3', 'reason': 'lives are lost so quickly to assault rifles '}, {'emotion': 'Fear', 'intensity': '5', 'reason': 'this seems like a gun actually being used in a situation where people are getting hurt'}, {'emotion': 'Sadness', 'intensity': '3', 'reason': 'Seeing guns ma…
475	Shooting suspect was able to buy guns despite mental illness	anonymous-source/all_shooting_images_newest/322.jpg	[{'emotion': 'Sadness', 'intensity': '4', 'reason': 'I feel sad that this country has so many school shootings and memorials'}, {'emotion': 'Sadness', 'intensity': '3', 'reason': 'peoples lives are reduced to just flowers on the side of a street for a memorial '}, {'emotion': 'Sadness', 'intensity': '4', 'reason': 'the flowers and candle represent that someone died'}, {'emotion': 'Sadness', 'inte…
476	Experts share ways you can keep yourself safe in a mass shooting	anonymous-source/all_shooting_images_newest/110359.jpg	[{'emotion': 'Fear', 'intensity': '4', 'reason': 'I would be so scared if this were to happen in my school'}, {'emotion': 'Sadness', 'intensity': '3', 'reason': "people shouldn't have to scramble to make sure their children are alive at school"}, {'emotion': 'Excitement', 'intensity': '4', 'reason': 'I want to know what happened'}, {'emotion': 'Sadness', 'intensity': '3', 'reason': "I'm not sure …
478	Doctors start movement in response to NRA, calling for more gun research	anonymous-source/all_shooting_images_newest/110107.jpg	[{'emotion': 'Fear', 'intensity': '5', 'reason': "I'd be so scared as as doctor seeing all victims of shootings, and I'm sad for what they have to go through"}, {'emotion': 'Sadness', 'intensity': '3', 'reason': "it's heavy on all levels to deal with. police. medical. social"}, {'emotion': 'Fear', 'intensity': '5', 'reason': 'the spots look like bloodstains'}, {'emotion': 'Sadness', 'intensity': …
480	Unlikely pair could usher gun rights case to U.S. Supreme Court	anonymous-source/all_shooting_images_newest/238.jpg	[{'emotion': 'Sadness', 'intensity': '3', 'reason': 'the lady in the picture may die, and this man may be her father or brother. '}, {'emotion': 'Sadness', 'intensity': '4', 'reason': 'he is mourning the loss of his daughter and the sadness is in his eyes'}, {'emotion': 'Sadness', 'intensity': '3', 'reason': 'I feel sad because I understand that death caused by gun violence is extremely sudden, m…
481	Trump visits Florida shooting victims, vows to tackle 'mental health' issues	anonymous-source/all_shooting_images_newest/10351.jpg	[{'emotion': 'Disgust', 'intensity': '3', 'reason': "I don't remember the news, but seems like they are in hospital. "}, {'emotion': 'Anger', 'intensity': '4', 'reason': "they didn't do much to combat gun violence"}, {'emotion': 'Anger', 'intensity': '3', 'reason': 'It upsets me because powerful politicians do not, for the most part, take the issue of gun violence seriously. '}, {'emotion': 'Amus…
482	White House slams Justice over 3D-printed guns Video	anonymous-source/all_shooting_images_newest/431.jpg	[{'emotion': 'Anger', 'intensity': '3', 'reason': "I don't know what's the topic she is talking about. "}, {'emotion': 'Anger', 'intensity': '4', 'reason': 'we need more anti gun violence activists'}, {'emotion': 'Anger', 'intensity': '3', 'reason': 'I do not trust politicians, yet they are the only ones who are able to implement policy. '}, {'emotion': 'Amusement', 'intensity': '3', 'reason': 't…
486	Thousands Attended The First Funerals For The Victims Of The Pittsburgh Synagogue Shooting	anonymous-source/all_shooting_images_newest/100417.jpg	[{'emotion': 'Sadness', 'intensity': '3', 'reason': 'those girls are crying, and they are so sad. '}, {'emotion': 'Sadness', 'intensity': '4', 'reason': 'I hate seeing people cry especially over something so tragic'}, {'emotion': 'Sadness', 'intensity': '3', 'reason': 'Its sad to see humans grieve over other humans who have died from human-made machinery.'}, {'emotion': 'Sadness', 'intensity': '3…
487	School shootings: How parents can cope with their own fears and anxieties	anonymous-source/all_shooting_images_newest/90267.jpg	[{'emotion': 'Sadness', 'intensity': '3', 'reason': 'This kid seems like not happy when he go to the school '}, {'emotion': 'Sadness', 'intensity': '4', 'reason': 'it hurts to think children are scared to go to school'}, {'emotion': 'Sadness', 'intensity': '3', 'reason': 'Whenever I see a politician speak about a recently tragic event, it is really difficult to take their words seriously. '}, {'e…
489	This is an unspoken culprit of school shootings	anonymous-source/all_shooting_images_newest/10679.jpg	[{'emotion': 'Anger', 'intensity': '3', 'reason': 'He is a prisoner'}, {'emotion': 'Anger', 'intensity': '5', 'reason': 'nothing was done to protect the students and guns are practically given away'}, {'emotion': 'Anger', 'intensity': '5', 'reason': 'I feel angry and disappointed because there are many cases in which there are enough clues to prevent gun violence tragedies from happening.'}, {'em…
490	School shootings: Should parents be charged for failing to lock up guns used by their kids?	anonymous-source/all_shooting_images_newest/501.jpg	[{'emotion': 'Sadness', 'intensity': '3', 'reason': "I don't know who they are. "}, {'emotion': 'Sadness', 'intensity': '4', 'reason': 'looks like more mourning for loved ones'}, {'emotion': 'Sadness', 'intensity': '4', 'reason': 'It is sad to see a life cut short by something that could have been prevented.'}, {'emotion': 'Sadness', 'intensity': '3', 'reason': 'missing a mother '}, {'emotion': '…
496	Las Vegas marks 1-year shooting anniversary Video	anonymous-source/all_shooting_images_newest/100418.jpg	[{'emotion': 'Sadness', 'intensity': '3', 'reason': 'This are the grave of the victims'}, {'emotion': 'Sadness', 'intensity': '5', 'reason': 'there are too many lives lost to gun violence'}, {'emotion': 'Sadness', 'intensity': '3', 'reason': 'With the knowledge of how corrupt U.S. gun violence laws are, its difficult to see people still honoring the country knowing how flawed it is. '}, {'emotion…
497	Teaching in the Age of School Shootings	anonymous-source/all_shooting_images_newest/90342.jpg	[{'emotion': 'Sadness', 'intensity': '3', 'reason': "It's an empty classroom. "}, {'emotion': 'Sadness', 'intensity': '4', 'reason': 'I cant imagine returning to school after such an incident'}, {'emotion': 'Anger', 'intensity': '3', 'reason': 'It should be people over profit. But in this country, it is profit over lives. '}, {'emotion': 'Sadness', 'intensity': '3', 'reason': 'we need school'}, {…
499	Remington, Centuries-Old Gun Maker, Files for Bankruptcy as Sales Slow	anonymous-source/all_shooting_images_newest/10006.jpg	[{'emotion': 'Disgust', 'intensity': '3', 'reason': "I don't agree with guns I think they should be regulated"}, {'emotion': 'Fear', 'intensity': '4', 'reason': 'I can hear the gun going off in my mind. I have fear about where it will go and what it might hit. I also feel horror. I am worried about what might happen and who might be harmed.'}, {'emotion': 'Fear', 'intensity': '5', 'reason': 'I do…
500	WI-Sen: Here s why a candidate s ad shows her sitting with a gun nearby	anonymous-source/all_shooting_images_newest/10148.jpg	[{'emotion': 'Disgust', 'intensity': '1', 'reason': 'this image kind of confuses me but I feel like the us political system is sort of corrupt to keep preexisting policy in place'}, {'emotion': 'Sadness', 'intensity': '2', 'reason': 'I feel sad because the image is dark and serious. The woman looks sad. I can tell something tragic happened here, and I am emotionally preparing to hear the story.'}…
505	Memorial Service, 5K Among Events Marking Las Vegas Shooting	anonymous-source/all_shooting_images_newest/90420.jpg	[{'emotion': 'Sadness', 'intensity': '2', 'reason': 'because this implies that people died and that makes me sad'}, {'emotion': 'Sadness', 'intensity': '2', 'reason': 'I am sad because I can tell these are probably victims of gun violence. However, the image is far away and warm, so I do not feel a strong emotional connection to them.'}, {'emotion': 'Sadness', 'intensity': '5', 'reason': "people …
506	Gun control legislation remains stalled in Congress	anonymous-source/all_shooting_images_newest/10800.jpg	[{'emotion': 'Contentment', 'intensity': '1', 'reason': "this image does not make me feel much but in the context of gun violence I guess I feel disappointed that the government hasn't effectively passed more gun control"}, {'emotion': 'Disgust', 'intensity': '1', 'reason': 'I feel disgust because I believe lawmakers are not passing enough prevention and reform laws. However, the building itself …
507	A new video game simulated school shootings. After outcry, it got taken down.	anonymous-source/all_shooting_images_newest/10437.jpg	[{'emotion': 'Anger', 'intensity': '4', 'reason': 'I believe video games are a huge driver of gun violence'}, {'emotion': 'Disgust', 'intensity': '1', 'reason': 'I am disgusted that this is the subject matter a video game decided to mimic. However, I do not feel any strong emotions. I disagree with it ethically, but I am not strongly horrified. I feel much stronger emotions towards real life exam…
509	Prominent Republican Donor Issues Ultimatum on Assault Weapons	anonymous-source/all_shooting_images_newest/10011.jpg	[{'emotion': 'Contentment', 'intensity': '1', 'reason': "this doesn't make me feel anything I don't know who this is"}, {'emotion': 'Disgust', 'intensity': '1', 'reason': 'I do not know who this man is. I feel disgust because I know he is a Republican, due to the elephant on his bookshelf. However, I feel no strong emotions.'}, {'emotion': 'Contentment', 'intensity': '1', 'reason': 'not sure who …
512	Trump Still Stands By Arming People Following Pittsburgh Synagogue Shooting	anonymous-source/all_shooting_images_newest/100491.jpg	[{'emotion': 'Disgust', 'intensity': '2', 'reason': "I don't agree with his policies and I think he's gross"}, {'emotion': 'Anger', 'intensity': '5', 'reason': 'I hate Donald Trump for many reasons. In the context of gun violence, I hate him because he did not do more to prevent it.'}, {'emotion': 'Anger', 'intensity': '5', 'reason': "It's trump and I can't stand anything he stand for."}, {'emoti…
513	Assault weapons ban moves forward in Deerfield, April vote likely	anonymous-source/all_shooting_images_newest/10482.jpg	[{'emotion': 'Disgust', 'intensity': '1', 'reason': "guns are killing machines and I don't think everyone should have them"}, {'emotion': 'Fear', 'intensity': '3', 'reason': 'I always feel fear when I see a gun.'}, {'emotion': 'Fear', 'intensity': '5', 'reason': 'I do not like seeing active guns. '}, {'emotion': 'Fear', 'intensity': '3', 'reason': 'I am worried that one day I might be shot by one…
515	11 questions on gun laws and mental health: How Cincinnati shooter purchased a gun legally	anonymous-source/all_shooting_images_newest/90430.jpg	[{'emotion': 'Sadness', 'intensity': '4', 'reason': 'so many people have died from guns and nothing has been done to fix the problem'}, {'emotion': 'Awe', 'intensity': '4', 'reason': 'This picture is extremely impactful. It hits me hard emotionally and inspires me to make change.'}, {'emotion': 'Sadness', 'intensity': '5', 'reason': "I agree it's been enough yet we still have active shootings."},…
518	Kentucky fair officials to propose ban on 'items of hate' after Nazi, KKK memorabilia sold at gun show | TheHill	anonymous-source/all_shooting_images_newest/110300.jpg	[{'emotion': 'Disgust', 'intensity': '3', 'reason': 'nazism should not be associated with Christmas it disgusts me to think that anyone would buy this'}, {'emotion': 'Disgust', 'intensity': '5', 'reason': 'This is racist and hateful.'}, {'emotion': 'Fear', 'intensity': '5', 'reason': "I'm Jewish. "}, {'emotion': 'Anger', 'intensity': '3', 'reason': "it's not funny and it should not be a joke. "},…
519	Florida 'stand your ground' shooter had history of gun threats: Complaint	anonymous-source/all_shooting_images_newest/1.jpg	[{'emotion': 'Fear', 'intensity': '3', 'reason': 'scary looking white men are especially scary '}, {'emotion': 'Disgust', 'intensity': '3', 'reason': 'I feel disgust because this man is in prison which implies something bad '}, {'emotion': 'Fear', 'intensity': '5', 'reason': 'I feel fear at people that use guns to harm people'}, {'emotion': 'Disgust', 'intensity': '3', 'reason': 'looks like a bad…
520	Texans turn to God as school rocked by latest shooting	anonymous-source/all_shooting_images_newest/10090.jpg	[{'emotion': 'Sadness', 'intensity': '4', 'reason': 'it makes me feel horrible seeing parents who have lost their children early'}, {'emotion': 'Sadness', 'intensity': '3', 'reason': 'I feel sad because these people look broken which implies maybe the lost loved ones'}, {'emotion': 'Sadness', 'intensity': '4', 'reason': 'I feel sad for people that are harmed by guns'}, {'emotion': 'Sadness', 'int…
522	Health Care, Gun Control And The Environment Will Rule The Florida Governor Race	anonymous-source/all_shooting_images_newest/481.jpg	[{'emotion': 'Contentment', 'intensity': '2', 'reason': "blue means democrat which is hopefully more left leaning (but usually isn't)"}, {'emotion': 'Contentment', 'intensity': '3', 'reason': 'I feel content because this man is speaking about what he believes in '}, {'emotion': 'Excitement', 'intensity': '4', 'reason': 'I feel excited for people that want to end gun violence'}, {'emotion': 'Conte…
525	Students Nationwide Walk Out Of Schools To Show Support For Second Amendment Rights	anonymous-source/all_shooting_images_newest/10553.jpg	[{'emotion': 'Sadness', 'intensity': '3', 'reason': 'this is the american school experience'}, {'emotion': 'Fear', 'intensity': '3', 'reason': 'I feel fear because public schools are the scene of many school shootings '}, {'emotion': 'Anger', 'intensity': '4', 'reason': 'I feel sad about people that do not take gun violence seriously'}, {'emotion': 'Contentment', 'intensity': '3', 'reason': 'yes …
528	Bandmates remember friend killed in series of 'cold-blooded' Nashville shootings	anonymous-source/all_shooting_images_newest/3.jpg	[{'emotion': 'Sadness', 'intensity': '2', 'reason': 'these empty locations make me wonder what happened'}, {'emotion': 'Contentment', 'intensity': '3', 'reason': ' I feel neutral because the image seems like a normal street '}, {'emotion': 'Fear', 'intensity': '4', 'reason': 'I feel fear about people that are harmed by guns because that can also be myself'}, {'emotion': 'Contentment', 'intensity'…
529	Florida man threatened people 3 different times before shooting man in 'stand your ground' case	anonymous-source/all_shooting_images_newest/7.jpg	[{'emotion': 'Fear', 'intensity': '2', 'reason': "there's so much scarring footage of gun violence happening"}, {'emotion': 'Sadness', 'intensity': '3', 'reason': 'I feel sad because it looks like this is a shooting '}, {'emotion': 'Fear', 'intensity': '4', 'reason': 'I feel fear about people that are harmed by guns because that can also be myself'}, {'emotion': 'Fear', 'intensity': '2', 'reason'…
530	7 ways to help prevent school shootings	anonymous-source/all_shooting_images_newest/10169.jpg	[{'emotion': 'Sadness', 'intensity': '2', 'reason': 'these families are being reunited but at what cost'}, {'emotion': 'Sadness', 'intensity': '3', 'reason': 'I feel sad because of the emotions on this girls face'}, {'emotion': 'Sadness', 'intensity': '4', 'reason': 'I feel sad for people that are harmed by guns'}, {'emotion': 'Sadness', 'intensity': '2', 'reason': 'loss of loved one'}, {'emotion…
535	Florida supermarket suspends political giving amid anti-NRA protest	anonymous-source/all_shooting_images_newest/10554.jpg	[{'emotion': 'Sadness', 'intensity': '2', 'reason': "this is such an awful way to protest bc it's too realistic "}, {'emotion': 'Awe', 'intensity': '3', 'reason': 'I feel admiration for these people expressing beliefs '}, {'emotion': 'Sadness', 'intensity': '4', 'reason': 'I feel sadness about people that are harmed by guns because that can also be myself'}, {'emotion': 'Contentment', 'intensity'…
536	The feds were watching, but unlicensed gun dealer was still able to sell Glock that killed Chicago police officer	anonymous-source/all_shooting_images_newest/100471.jpg	[{'emotion': 'Sadness', 'intensity': '2', 'reason': 'are these people heroes or are they just victims?'}, {'emotion': 'Sadness', 'intensity': '3', 'reason': 'I feel sad because this is a funeral '}, {'emotion': 'Disgust', 'intensity': '4', 'reason': 'I feel disgust about people that use their influence to allow guns that harm people'}, {'emotion': 'Sadness', 'intensity': '2', 'reason': 'loss of l…
538	Gun control group targets firearms owners with new ads, seeks common ground	anonymous-source/all_shooting_images_newest/32.jpg	[{'emotion': 'Sadness', 'intensity': '2', 'reason': 'some victims are just so young.'}, {'emotion': 'Sadness', 'intensity': '3', 'reason': 'I feel sad because this boy seems confused'}, {'emotion': 'Sadness', 'intensity': '4', 'reason': 'I feel sad about people that do not take gun violence seriously'}, {'emotion': 'Sadness', 'intensity': '2', 'reason': 'probably a loved was killed by guns'}, {'e…
539	Judge blocks Texas company from putting plans to make 3D guns online	anonymous-source/all_shooting_images_newest/364.jpg	[{'emotion': 'Excitement', 'intensity': '3', 'reason': 'its a gun'}, {'emotion': 'Fear', 'intensity': '2', 'reason': 'the sight of a gun has always scared me and has dramatically increased since being present during a shooting six months ago in mexico'}, {'emotion': 'Amusement', 'intensity': '3', 'reason': '3d printing guns is cool'}, {'emotion': 'Excitement', 'intensity': '3', 'reason': 'No emot…
540	Trump woos NRA gun lobby in Dallas	anonymous-source/all_shooting_images_newest/10118.jpg	[{'emotion': 'Contentment', 'intensity': '3', 'reason': 'its Donald'}, {'emotion': 'Amusement', 'intensity': '2', 'reason': 'i cannot believe he was in office'}, {'emotion': 'Amusement', 'intensity': '3', 'reason': 'funny looking guy'}, {'emotion': 'Excitement', 'intensity': '3', 'reason': 'Rich facial expressions '}, {'emotion': 'Disgust', 'intensity': '5', 'reason': 'Any image of donald trump m…
543	Florida police confiscate guns for the first time under state s new gun-control laws	anonymous-source/all_shooting_images_newest/10161.jpg	[{'emotion': 'Contentment', 'intensity': '3', 'reason': 'its a gun'}, {'emotion': 'Fear', 'intensity': '3', 'reason': 'same reason for fear above'}, {'emotion': 'Contentment', 'intensity': '3', 'reason': 'interesting looking gun collection '}, {'emotion': 'Fear', 'intensity': '3', 'reason': 'No emotions are raised '}, {'emotion': 'Fear', 'intensity': '3', 'reason': 'The thought and sight of a gun…
545	Vegas garden gives families, shooting victims place to mourn	anonymous-source/all_shooting_images_newest/90043.jpg	[{'emotion': 'Excitement', 'intensity': '3', 'reason': 'I love art'}, {'emotion': 'Anger', 'intensity': '4', 'reason': 'life has been taken by gun violence'}, {'emotion': 'Sadness', 'intensity': '3', 'reason': 'loss of loved ones is sad'}, {'emotion': 'Sadness', 'intensity': '3', 'reason': 'Feeling of empathy '}, {'emotion': 'Sadness', 'intensity': '3', 'reason': 'I could not imagine losing a lov…
546	Gunman who killed 2 at Florida yoga studio had history of harassing young women	anonymous-source/all_shooting_images_newest/110507.jpg	[{'emotion': 'Fear', 'intensity': '3', 'reason': 'police are there'}, {'emotion': 'Fear', 'intensity': '4', 'reason': 'reminds me of the shooting i was in'}, {'emotion': 'Contentment', 'intensity': '3', 'reason': 'police doing their jobs'}, {'emotion': 'Fear', 'intensity': '3', 'reason': 'Feeling of insecure '}, {'emotion': 'Fear', 'intensity': '3', 'reason': 'This scene could happen anywhere. It…
549	Texas man is selling 3D gun blueprints online despite court orders	anonymous-source/all_shooting_images_newest/409.jpg	[{'emotion': 'Excitement', 'intensity': '3', 'reason': 'I have no idea what this is'}, {'emotion': 'Disgust', 'intensity': '1', 'reason': 'annoyed by gun images'}, {'emotion': 'Amusement', 'intensity': '3', 'reason': '3d printed guns are cool but should be religated '}, {'emotion': 'Fear', 'intensity': '3', 'reason': 'No emotions are raised '}, {'emotion': 'Fear', 'intensity': '3', 'reason': "Why…
553	New Jersey is one of the latest states to enact new gun control measures	anonymous-source/all_shooting_images_newest/10214.jpg	[{'emotion': 'Fear', 'intensity': '3', 'reason': 'guns kill people'}, {'emotion': 'Disgust', 'intensity': '4', 'reason': 'too many guns'}, {'emotion': 'Disgust', 'intensity': '3', 'reason': 'probably illegally bought weapons'}, {'emotion': 'Fear', 'intensity': '3', 'reason': 'No emotions are raised '}, {'emotion': 'Fear', 'intensity': '5', 'reason': 'Seeing so many of an item that kills people ma…
556	Yoga studio shooter posted racist, misogynistic videos	anonymous-source/all_shooting_images_newest/110509.jpg	[{'emotion': 'Fear', 'intensity': '3', 'reason': 'police suck'}, {'emotion': 'Fear', 'intensity': '3', 'reason': 'reminds me of the shooting i was in'}, {'emotion': 'Sadness', 'intensity': '3', 'reason': 'probably a bad crime committed here'}, {'emotion': 'Fear', 'intensity': '3', 'reason': 'Dizzy lightning '}, {'emotion': 'Fear', 'intensity': '3', 'reason': 'I feel sad because because of gun vio…
560	Trump is uniquely positioned to cut a deal to prevent school shootings	anonymous-source/all_shooting_images_newest/10659.jpg	[{'emotion': 'Sadness', 'intensity': '5', 'reason': 'She is probably a mother who lost her child in school shooting.'}, {'emotion': 'Sadness', 'intensity': '3', 'reason': 'I feel heartbroken when I saw the girl crying'}, {'emotion': 'Sadness', 'intensity': '5', 'reason': 'Losing a loved one is the hardest thing in the world'}, {'emotion': 'Sadness', 'intensity': '4', 'reason': 'the lady looks to …
563	Study claiming US is home of one-third of mass-shooters worldwide debunked; figure less than 1.5 percent	anonymous-source/all_shooting_images_newest/90304.jpg	[{'emotion': 'Sadness', 'intensity': '4', 'reason': 'In this such a beautiful place another gun violence happened'}, {'emotion': 'Fear', 'intensity': '3', 'reason': 'There must be a murder happened here'}, {'emotion': 'Fear', 'intensity': '2', 'reason': 'I wonder what happened but it seems serious'}, {'emotion': 'Fear', 'intensity': '4', 'reason': 'this place looks like an open public space that …
564	YouTube to Ban Videos Promoting Gun Sales	anonymous-source/all_shooting_images_newest/10277.jpg	[{'emotion': 'Fear', 'intensity': '4', 'reason': "Anyone can purchase guns with Federal Firearm License. Don't know how strict the examination is."}, {'emotion': 'Fear', 'intensity': '3', 'reason': 'I really hate and afraid guns '}, {'emotion': 'Awe', 'intensity': '1', 'reason': "I don't know why people love machines that are built to kill people so much"}, {'emotion': 'Fear', 'intensity': '4', '…
566	Trump dubs California bar shooter 'sick puppy' as community grieves	anonymous-source/all_shooting_images_newest/110128.jpg	[{'emotion': 'Sadness', 'intensity': '5', 'reason': "The mood of this picture is just so sad. We don't want any parents to lose their children anymore."}, {'emotion': 'Sadness', 'intensity': '3', 'reason': 'I feel so sad to see people crying'}, {'emotion': 'Sadness', 'intensity': '4', 'reason': 'These people look like they lost someone'}, {'emotion': 'Sadness', 'intensity': '4', 'reason': 'it loo…
570	Student survivors of mass shooting say they're disappointed in lawmakers, but vow to keep fighting	anonymous-source/all_shooting_images_newest/10697.jpg	[{'emotion': 'Sadness', 'intensity': '5', 'reason': "It's the living who suffer the most."}, {'emotion': 'Sadness', 'intensity': '3', 'reason': "I'm so sad to see she is crying"}, {'emotion': 'Sadness', 'intensity': '5', 'reason': 'Someone being comforted after losing someone'}, {'emotion': 'Sadness', 'intensity': '5', 'reason': 'this girl appears to have lost someone that was close to her due to…
580	Students Lead Huge Rallies for Gun Control Across the U.S.	anonymous-source/all_shooting_images_newest/10218.jpg	[{'emotion': 'Sadness', 'intensity': '4', 'reason': 'These two people looks pretty worried, which might indicate something bad just happened'}, {'emotion': 'Sadness', 'intensity': '4', 'reason': 'POC/minorities in the US have to constantly live in fear because no change is being made. '}, {'emotion': 'Awe', 'intensity': '4', 'reason': "I'm inspired by them, but also sad of what they likely have b…
582	Judge Temporarily Blocks Distribution of Files for Printing Guns	anonymous-source/all_shooting_images_newest/497.jpg	[{'emotion': 'Anger', 'intensity': '1', 'reason': "Donald Trump's policy is to keep the right of owning guns, I personally hate this policy so I am mild angry to him."}, {'emotion': 'Anger', 'intensity': '5', 'reason': 'Trump is ignorant and his entire presidency was run on hatred and violence. '}, {'emotion': 'Anger', 'intensity': '4', 'reason': 'I dislike Trump more than most politicians.'}, {'…
584	Gun control vs. mental health care: debate after mass shootings obscures murky reality	anonymous-source/all_shooting_images_newest/110337.jpg	[{'emotion': 'Fear', 'intensity': '4', 'reason': 'The bullets are put into the magazine, which means someone plans to shoot with the pistol. It makes me feel fear.'}, {'emotion': 'Fear', 'intensity': '4', 'reason': "there's just no need for ordinary citizens to own guns in today's society. "}, {'emotion': 'Awe', 'intensity': '3', 'reason': 'How has it come to the point where this is necessary for…
586	That's it no more guns.	anonymous-source/all_shooting_images_newest/100483.jpg	[{'emotion': 'Sadness', 'intensity': '5', 'reason': 'The picture tells me that someone that this lady knows might be killed in a gun violence, which makes me feel sad'}, {'emotion': 'Sadness', 'intensity': '4', 'reason': 'how many more lives will it take?'}, {'emotion': 'Sadness', 'intensity': '4', 'reason': 'Powerful photograph, shows grief very well'}, {'emotion': 'Sadness', 'intensity': '5', '…
590	School safety bill introduced by bipartisan senators in response to Florida shooting	anonymous-source/all_shooting_images_newest/10240.jpg	[{'emotion': 'Fear', 'intensity': '2', 'reason': 'Given the context of gun violence, these groups of people might be escaping from a gun violence scene, which makes me feel fear.'}, {'emotion': 'Sadness', 'intensity': '4', 'reason': "we're become desensitized to this culture. "}, {'emotion': 'Sadness', 'intensity': '3', 'reason': "I can't really tell what this is, but if it's students getting awa…
594	One Big Loser on Black Friday? Gun Sales	anonymous-source/all_shooting_images_newest/110453.jpg	[{'emotion': 'Fear', 'intensity': '5', 'reason': 'The close-up picture of so many pistols towards me makes me feel fear.'}, {'emotion': 'Fear', 'intensity': '5', 'reason': 'killing device. '}, {'emotion': 'Sadness', 'intensity': '1', 'reason': 'Stock images of guns only do so much'}, {'emotion': 'Fear', 'intensity': '3', 'reason': 'I do not like guns and their accessibility is frightening. '}, {'…
596	Community mourns after mass shooting at Pittsburgh synagogue	anonymous-source/all_shooting_images_newest/100490.jpg	[{'emotion': 'Sadness', 'intensity': '5', 'reason': 'People are preying for the victims in the gun violence incident.'}, {'emotion': 'Sadness', 'intensity': '4', 'reason': 'how many more lives will it take. '}, {'emotion': 'Sadness', 'intensity': '2', 'reason': 'Vigils are always sad to me'}, {'emotion': 'Sadness', 'intensity': '3', 'reason': "so many people have lost their lives that could've be…
600	Parkland Shooter's Rifle Magazines Were Etched With Swastikas: Reports	anonymous-source/all_shooting_images_newest/10026.jpg	[{'emotion': 'Fear', 'intensity': '4', 'reason': 'They are forced to do something.'}, {'emotion': 'Sadness', 'intensity': '3', 'reason': 'these people look like children...'}, {'emotion': 'Fear', 'intensity': '3', 'reason': "the people's lives are being threatened by the men who hold guns."}, {'emotion': 'Disgust', 'intensity': '5', 'reason': 'It is disgusting to see how sick this shooter was. Th…
603	Gamers plead for more security after deadly Jacksonville shooting	anonymous-source/all_shooting_images_newest/137.jpg	[{'emotion': 'Fear', 'intensity': '4', 'reason': 'It looks like the police are investigating the crime scene'}, {'emotion': 'Sadness', 'intensity': '3', 'reason': 'the sheer amount of cops is kinda telling'}, {'emotion': 'Fear', 'intensity': '3', 'reason': 'the police seems to be warning the people in this nearby areas about the criminals who might be surrounding there.'}, {'emotion': 'Sadness', …
606	Las Vegas shooting memorial marks grim anniversary: 'None of us will ever be the same'	anonymous-source/all_shooting_images_newest/100440.jpg	[{'emotion': 'Sadness', 'intensity': '5', 'reason': 'There are so many people died because of guns.'}, {'emotion': 'Sadness', 'intensity': '3', 'reason': 'no one should have to die at the barrel of a gun'}, {'emotion': 'Sadness', 'intensity': '3', 'reason': 'many people have died from the gun violence.'}, {'emotion': 'Sadness', 'intensity': '4', 'reason': 'This headline serves as a reminder. Usua…
609	Parkland shooting suspect seen 'smiling and giggling' in jail, records show	anonymous-source/all_shooting_images_newest/10902.jpg	[{'emotion': 'Anger', 'intensity': '5', 'reason': 'This guy must have done something wrong.'}, {'emotion': 'Anger', 'intensity': '3', 'reason': "is this the same kid as the first picture??? i'm gonna assume he was a shooter"}, {'emotion': 'Anger', 'intensity': '2', 'reason': 'the criminal has hurt lots of people.'}, {'emotion': 'Anger', 'intensity': '5', 'reason': 'this headline makes me feel ver…
610	These Are The Victims Of The Santa Fe High School Shooting	anonymous-source/all_shooting_images_newest/10044.jpg	[{'emotion': 'Sadness', 'intensity': '5', 'reason': 'They are crying. They appear to be victims'}, {'emotion': 'Sadness', 'intensity': '3', 'reason': 'they seem to be at a memorial... those are kids and an adult... people shouldnt have to go through this'}, {'emotion': 'Sadness', 'intensity': '3', 'reason': 'the family is crying about their loss of another family member due to gun violence.'}, {'…
612	Rudy Giuliani keeps tweeting on Chicago gun violence and Garry McCarthy says he's 'a proud Democrat'	anonymous-source/all_shooting_images_newest/460.jpg	[{'emotion': 'Awe', 'intensity': '4', 'reason': 'This man looks so serious.'}, {'emotion': 'Anger', 'intensity': '3', 'reason': 'old men that look like politicians kinda anger me, especially in a gun violence context'}, {'emotion': 'Awe', 'intensity': '3', 'reason': 'the spokesman is talking about serious announcement.'}, {'emotion': 'Amusement', 'intensity': '2', 'reason': "These two facts seem …
614	Glendale Police Department to host anonymous gun buyback event	anonymous-source/all_shooting_images_newest/110179.jpg	[{'emotion': 'Fear', 'intensity': '3', 'reason': "I'm afraid of these guns."}, {'emotion': 'Anger', 'intensity': '3', 'reason': 'too many guns.'}, {'emotion': 'Fear', 'intensity': '3', 'reason': "there's a lot of weapon on the table."}, {'emotion': 'Excitement', 'intensity': '4', 'reason': 'It is exciting to see that local police are taking action in support of gun regulation. It makes me feel ho…
616	Community, Religious Leaders Say Pittsburgh Synagogue Shooting 'Will Not Break Us' At Vigil	anonymous-source/all_shooting_images_newest/100445.jpg	[{'emotion': 'Sadness', 'intensity': '3', 'reason': 'They are crying. They appear to be victims'}, {'emotion': 'Sadness', 'intensity': '3', 'reason': 'i also know what this is from... no one deserves to experience this'}, {'emotion': 'Contentment', 'intensity': '3', 'reason': 'the two people seems to not see each other for a long time.'}, {'emotion': 'Sadness', 'intensity': '5', 'reason': 'I feel…
618	Fact check: Is there a link between media violence and mass shootings?	anonymous-source/all_shooting_images_newest/10896.jpg	[{'emotion': 'Amusement', 'intensity': '4', 'reason': 'Games can help people leave real guns.'}, {'emotion': 'Sadness', 'intensity': '3', 'reason': 'if this is that same game bar, then i know what happens here too'}, {'emotion': 'Amusement', 'intensity': '3', 'reason': 'vr is fun to play.'}, {'emotion': 'Fear', 'intensity': '4', 'reason': 'It is scary to think that something so ingrained in our s…
620	Son, I love you': Heartbreaking stories emerge of Thousand Oaks mass shooting victims - ABC News	anonymous-source/all_shooting_images_newest/110517.jpg	[{'emotion': 'Sadness', 'intensity': '1', 'reason': 'They look like they just went through something, something bad just happened'}, {'emotion': 'Sadness', 'intensity': '4', 'reason': 'i feel really sad because the woman is crying, seems like she just experienced some thing scared.'}, {'emotion': 'Sadness', 'intensity': '4', 'reason': 'I feel they might experience something bad before, maybe frie…
621	Trump to meet with high school students following Florida shooting	anonymous-source/all_shooting_images_newest/10779.jpg	[{'emotion': 'Awe', 'intensity': '1', 'reason': 'They look serious, probably have meeting with families of victims'}, {'emotion': 'Sadness', 'intensity': '3', 'reason': 'i think the overall emotion is sad because i think all of them look a bit serious. '}, {'emotion': 'Anger', 'intensity': '4', 'reason': 'When he was the president, he does not care about gun violence in the United States.'}, {'em…
623	Judge blocks release of blueprints for 3D guns	anonymous-source/all_shooting_images_newest/188.jpg	[{'emotion': 'Fear', 'intensity': '1', 'reason': 'A 3D printed gun was easily made. It looks like a toy, but it kills.'}, {'emotion': 'Amusement', 'intensity': '4', 'reason': "i don't think this gun is the real gun and compared to the real gun violence, it is just nothing. "}, {'emotion': 'Fear', 'intensity': '3', 'reason': 'I am afraid that when more children play with gun toys, there will be mo…
625	Right-Wing Pundit Taunts Survivors of Parkland Shooting for Losing Weapons-Ban Vote in Florida Legislature	anonymous-source/all_shooting_images_newest/10066.jpg	[{'emotion': 'Sadness', 'intensity': '1', 'reason': 'The vibe means someone pass away, probably because of a shooting'}, {'emotion': 'Sadness', 'intensity': '4', 'reason': 'i feel sad because i think the woman is mourning for someone she loved but now left her forever. '}, {'emotion': 'Sadness', 'intensity': '4', 'reason': 'There are so many people dying because of gun violence. I feel sorry and …
626	Former co-worker: Wisconsin shooting suspect never smiled	anonymous-source/all_shooting_images_newest/90147.jpg	[{'emotion': 'Fear', 'intensity': '1', 'reason': 'It means something bad happened.'}, {'emotion': 'Contentment', 'intensity': '4', 'reason': 'i am satisfied because i think the one they carried will be okey because so many people are caring about her/him. '}, {'emotion': 'Fear', 'intensity': '3', 'reason': 'I am afraid that the gun violence happened round me for the next time.'}, {'emotion': 'Sad…
628	Pharrell Sent Trump Cease-And-Desist Letter For Playing Happy After Synagogue Shooting	anonymous-source/all_shooting_images_newest/100239.jpg	[{'emotion': 'Sadness', 'intensity': '1', 'reason': 'His eye make me feel so sad'}, {'emotion': 'Sadness', 'intensity': '3', 'reason': "i don't think he has any energy to face any problem. "}, {'emotion': 'Sadness', 'intensity': '3', 'reason': 'I am thinking about the relationship between racism and gun violence.'}, {'emotion': 'Contentment', 'intensity': '1', 'reason': "I wouldn't know who this …
631	Trump administration to aid states in firearms training for teachers, school staff	anonymous-source/all_shooting_images_newest/10783.jpg	[{'emotion': 'Awe', 'intensity': '1', 'reason': 'She seems to be criticizing someone and makes me a little nervous'}, {'emotion': 'Awe', 'intensity': '5', 'reason': 'i think this woman gives me a sense of authority and credibility. '}, {'emotion': 'Awe', 'intensity': '3', 'reason': 'I am thinking about the relationship between women and gun violence. '}, {'emotion': 'Amusement', 'intensity': '1',…
633	The Americas Account for Half of Annual Gun Deaths Worldwide	anonymous-source/all_shooting_images_newest/376.jpg	[{'emotion': 'Fear', 'intensity': '1', 'reason': "Guns are being sold like brooms, it doesn't look safe"}, {'emotion': 'Disgust', 'intensity': '5', 'reason': 'i still think that gun is the source of all the evilness happen. '}, {'emotion': 'Fear', 'intensity': '3', 'reason': 'I am afraid that when more states are permitted to buy guns, like in the picture, there will be more unavoidable gun viole…
634	Gun owners group vows to sue after Washington state passes tough new regulations | Fox News	anonymous-source/all_shooting_images_newest/110479.jpg	[{'emotion': 'Fear', 'intensity': '1', 'reason': 'This move looks aggressive and gives a feeling of tension'}, {'emotion': 'Anger', 'intensity': '5', 'reason': 'it makes me feel angry because gun makes the violence but they gave me a feeling that they admired the gun. '}, {'emotion': 'Fear', 'intensity': '4', 'reason': 'Since the man in the picture takes a gun, I feel more afraid about the use of…
635	15 Students Have Been Arrested for Threatening School Violence since Parkland Shooting, Officials Say	anonymous-source/all_shooting_images_newest/10100.jpg	[{'emotion': 'Sadness', 'intensity': '4', 'reason': 'They are suffering from the loss of a loved one and it affects me too'}, {'emotion': 'Sadness', 'intensity': '5', 'reason': 'i think the all flowers are not just flowers, they are the love for the people who died because of the gun. '}, {'emotion': 'Sadness', 'intensity': '3', 'reason': 'I feel sad for people whose family members or friends hav…
636	Gov. Brown just signed a stack of new gun control laws. Here's what they do	anonymous-source/all_shooting_images_newest/90227.jpg	[{'emotion': 'Sadness', 'intensity': '3', 'reason': 'They all look innocent people, but for safety, they have to raise their hands to prove their innocence. This looks really sad'}, {'emotion': 'Contentment', 'intensity': '5', 'reason': 'the people who involved in the gun violence were caught by the police'}, {'emotion': 'Disgust', 'intensity': '3', 'reason': 'I feel people in the picture may hav…
639	Dementia complicates US gun ownership	anonymous-source/all_shooting_images_newest/10699.jpg	[{'emotion': 'Fear', 'intensity': '1', 'reason': 'There is still gun violence outside.'}, {'emotion': 'Fear', 'intensity': '3', 'reason': 'Guns are scary'}, {'emotion': 'Fear', 'intensity': '3', 'reason': 'he is holding a gun'}, {'emotion': 'Fear', 'intensity': '3', 'reason': 'It seems like a picture for evidence'}, {'emotion': 'Fear', 'intensity': '1', 'reason': "Looks like an average man holdin…
641	Gun control, teacher groups threaten legal action against DeVos over possible firearms funding	anonymous-source/all_shooting_images_newest/228.jpg	[{'emotion': 'Excitement', 'intensity': '1', 'reason': 'I cannot tell anything from the picture. '}, {'emotion': 'Sadness', 'intensity': '3', 'reason': 'very sad'}, {'emotion': 'Contentment', 'intensity': '3', 'reason': 'no idea what is this for'}, {'emotion': 'Disgust', 'intensity': '4', 'reason': 'DEvos'}, {'emotion': 'Contentment', 'intensity': '1', 'reason': 'The woman makes me feel safe and …
642	The Latest: NRA president campaigns for GOP candidate Hawley	anonymous-source/all_shooting_images_newest/110351.jpg	[{'emotion': 'Excitement', 'intensity': '1', 'reason': 'I cannot tell anything from this picture. '}, {'emotion': 'Sadness', 'intensity': '3', 'reason': 'sad'}, {'emotion': 'Contentment', 'intensity': '3', 'reason': 'she is proud'}, {'emotion': 'Disgust', 'intensity': '3', 'reason': 'Politician'}, {'emotion': 'Contentment', 'intensity': '1', 'reason': 'The woman looks nice and she looks happy.'},…
643	The Gun Business Is Bouncing Back From a Long Trump Slump	anonymous-source/all_shooting_images_newest/90116.jpg	[{'emotion': 'Fear', 'intensity': '1', 'reason': 'There is still gun violence outside.'}, {'emotion': 'Fear', 'intensity': '3', 'reason': 'guns are scary'}, {'emotion': 'Fear', 'intensity': '3', 'reason': 'gun'}, {'emotion': 'Contentment', 'intensity': '1', 'reason': "No idea why there isn't a neutral emotion for this, so I'll just choose contentment"}, {'emotion': 'Fear', 'intensity': '1', 'reas…
645	Trump s Response to the Pittsburgh Shooting Proves He Doesn t Actually Care About Religious Liberty	anonymous-source/all_shooting_images_newest/100178.jpg	[{'emotion': 'Sadness', 'intensity': '1', 'reason': 'There is still gun violence outside.'}, {'emotion': 'Sadness', 'intensity': '3', 'reason': 'sad that lives were taken'}, {'emotion': 'Awe', 'intensity': '3', 'reason': 'dont know what happen'}, {'emotion': 'Sadness', 'intensity': '4', 'reason': "It's very clearly after a tragic event"}, {'emotion': 'Sadness', 'intensity': '1', 'reason': 'The po…
646	Michigan's top court hearing cases over guns at schools	anonymous-source/all_shooting_images_newest/10164.jpg	[{'emotion': 'Sadness', 'intensity': '1', 'reason': 'There is still gun violence outside.'}, {'emotion': 'Sadness', 'intensity': '3', 'reason': 'most likely connected to a shooting so its sad'}, {'emotion': 'Sadness', 'intensity': '3', 'reason': 'school and teenagers'}, {'emotion': 'Contentment', 'intensity': '1', 'reason': 'It is just a school'}, {'emotion': 'Sadness', 'intensity': '1', 'reason'…
649	State won't do business with Bank of America, Citi over their gun policies	anonymous-source/all_shooting_images_newest/189.jpg	[{'emotion': 'Fear', 'intensity': '1', 'reason': 'There is still gun violence outside.'}, {'emotion': 'Fear', 'intensity': '3', 'reason': 'guns are scary'}, {'emotion': 'Fear', 'intensity': '3', 'reason': 'gun'}, {'emotion': 'Contentment', 'intensity': '1', 'reason': 'Just seems a like a stock image of a gun'}, {'emotion': 'Fear', 'intensity': '1', 'reason': "i don't know who is holding the guns …
652	Trump administration to ban bump stocks for guns	anonymous-source/all_shooting_images_newest/110362.jpg	[{'emotion': 'Amusement', 'intensity': '1', 'reason': 'this gesture is funny. '}, {'emotion': 'Disgust', 'intensity': '3', 'reason': 'HATE THIS MAN'}, {'emotion': 'Amusement', 'intensity': '3', 'reason': 'Trump'}, {'emotion': 'Disgust', 'intensity': '4', 'reason': 'Trump'}, {'emotion': 'Anger', 'intensity': '1', 'reason': "I don't like Donald Trump"}, {'emotion': 'Disgust', 'intensity': '5', 'rea…
653	Judge strikes down California ban on storefront handgun ads	anonymous-source/all_shooting_images_newest/90120.jpg	[{'emotion': 'Fear', 'intensity': '1', 'reason': 'There is still gun violence outside.'}, {'emotion': 'Fear', 'intensity': '3', 'reason': 'guns are scary'}, {'emotion': 'Fear', 'intensity': '3', 'reason': 'gun'}, {'emotion': 'Contentment', 'intensity': '1', 'reason': 'Just seems to be a stock image of a gun'}, {'emotion': 'Fear', 'intensity': '1', 'reason': "I don't like guns and the power that t…
654	NW Indiana students face detention, praise during walkout advocating gun reform	anonymous-source/all_shooting_images_newest/10237.jpg	[{'emotion': 'Sadness', 'intensity': '3', 'reason': 'There is still gun violence outside.'}, {'emotion': 'Sadness', 'intensity': '3', 'reason': 'sad that students have to fight for this'}, {'emotion': 'Awe', 'intensity': '3', 'reason': 'ppl marching'}, {'emotion': 'Sadness', 'intensity': '4', 'reason': 'Seeing kids who died for no reason'}, {'emotion': 'Sadness', 'intensity': '2', 'reason': 'The …
655	Eiffel Tower, Empire State Building Go Dark To Honor Pittsburgh Synagogue Shooting Victims	anonymous-source/all_shooting_images_newest/100207.jpg	[{'emotion': 'Amusement', 'intensity': '1', 'reason': 'The Eiffel Tower is beautiful. '}, {'emotion': 'Sadness', 'intensity': '3', 'reason': 'the lighting is very sad'}, {'emotion': 'Fear', 'intensity': '3', 'reason': 'gun'}, {'emotion': 'Sadness', 'intensity': '4', 'reason': "A gesture that shouldn't need to be made. More examples of mass shootings"}, {'emotion': 'Sadness', 'intensity': '1', 're…
658	Rosanne Cash on California Shootings: We Use Young People as Collateral Damage for the Second Amendment	anonymous-source/all_shooting_images_newest/110472.jpg	[{'emotion': 'Sadness', 'intensity': '1', 'reason': 'There is still gun violence outside.'}, {'emotion': 'Sadness', 'intensity': '3', 'reason': 'sad'}, {'emotion': 'Sadness', 'intensity': '3', 'reason': 'i dont know'}, {'emotion': 'Disgust', 'intensity': '2', 'reason': 'Reminds me of country music which has ties to a republican base which love guns'}, {'emotion': 'Contentment', 'intensity': '1', …
659	Pittsburgh shooting: Alleged gunman posted stream of anti-Semitic hate online in months and moments before attack	anonymous-source/all_shooting_images_newest/100064.jpg	[{'emotion': 'Fear', 'intensity': '3', 'reason': "Don't judge a book by its cover but he looks like someone who could support gun violence"}, {'emotion': 'Fear', 'intensity': '4', 'reason': "seems like it's a picture on news about people who conduct crime"}, {'emotion': 'Fear', 'intensity': '3', 'reason': 'He seems guilty of crime.'}, {'emotion': 'Anger', 'intensity': '3', 'reason': 'I hate him a…
663	Pittsburgh synagogue shooting, mail bombs show US 'toxic' discourse spurs 'deranged' people to act: Ex-DHS chief	anonymous-source/all_shooting_images_newest/100372.jpg	[{'emotion': 'Fear', 'intensity': '5', 'reason': 'I feel fear because this looks like a scene from after a shooting or if there was currently a shooting ongoing'}, {'emotion': 'Fear', 'intensity': '4', 'reason': 'there are many armed people in the image'}, {'emotion': 'Sadness', 'intensity': '3', 'reason': 'Seems like the police were brought into a peaceful and non-violent environment. '}, {'emot…
666	Thousands Gather to Honor Victims of the Mass Shooting with Tears, Candlelight and Song	anonymous-source/all_shooting_images_newest/110414.jpg	[{'emotion': 'Sadness', 'intensity': '5', 'reason': 'This seems to relate to one of the previous captions with tears, candlelights, and songs. A lot of people definitely gathered after a mass shooting to remember the lives lost'}, {'emotion': 'Sadness', 'intensity': '4', 'reason': 'people hold candles and the women is crying'}, {'emotion': 'Sadness', 'intensity': '5', 'reason': "It looks like the…
669	The lonely lone shooter: The Pittsburgh synagogue suspect's apparently isolated life	anonymous-source/all_shooting_images_newest/100066.jpg	[{'emotion': 'Fear', 'intensity': '4', 'reason': 'this definitely looks like someone who is either a mass shooter or someone who could potentially be one'}, {'emotion': 'Fear', 'intensity': '4', 'reason': 'seems like is a person who conduct a crime or something bad'}, {'emotion': 'Disgust', 'intensity': '4', 'reason': 'He looks guilty of a crime, no emotion. '}, {'emotion': 'Anger', 'intensity': …
670	Health care tops guns, economy as voters' top issue	anonymous-source/all_shooting_images_newest/100090.jpg	[{'emotion': 'Sadness', 'intensity': '4', 'reason': 'Most likely a victim of a shooting, it is heart breaking to see what families have to go through after an event like that.'}, {'emotion': 'Sadness', 'intensity': '3', 'reason': 'seems like a person is ill'}, {'emotion': 'Sadness', 'intensity': '4', 'reason': 'Looks like someone getting treatment for their wounds. '}, {'emotion': 'Sadness', 'int…
674	California lawmakers vote to expand gun restraining orders but ACLU says bill goes too far	anonymous-source/all_shooting_images_newest/10623.jpg	[{'emotion': 'Fear', 'intensity': '5', 'reason': 'these guns look like heavily lethal weapons and its being sold seemingly very easily'}, {'emotion': 'Fear', 'intensity': '3', 'reason': "it's something related to guns"}, {'emotion': 'Fear', 'intensity': '3', 'reason': 'Guns being for sale and the fact that anyone can buy them is unsettling. '}, {'emotion': 'Fear', 'intensity': '4', 'reason': 'gun…
675	The standout moments that made CNN's gun control town hall feel like a game-changer	anonymous-source/all_shooting_images_newest/10872.jpg	[{'emotion': 'Sadness', 'intensity': '5', 'reason': 'it is someone who is protesting against gun-violence and anti-gun rights. Likely someone who has a family member that experienced a tragedy or was part of the tragedy themselves.'}, {'emotion': 'Sadness', 'intensity': '4', 'reason': 'the movement about gun control touches me'}, {'emotion': 'Excitement', 'intensity': '3', 'reason': 'Makes me fee…
676	I wanted him to feel compassion : The Jewish nurse who treated the synagogue shooting suspect tells his story	anonymous-source/all_shooting_images_newest/110477.jpg	[{'emotion': 'Sadness', 'intensity': '5', 'reason': 'Looks like the aftermath of a shooting, it is heart breaking to see these scenes especially since it is children that is affected'}, {'emotion': 'Sadness', 'intensity': '4', 'reason': 'people are mourning for the victim(s)'}, {'emotion': 'Sadness', 'intensity': '3', 'reason': 'The woman seems to be mourning over a tragic event. This saddens me.…
679	Kroger shooting suspect apparently sought access to mostly black church before slayings	anonymous-source/all_shooting_images_newest/100439.jpg	[{'emotion': 'Fear', 'intensity': '3', 'reason': 'the guy looks so scary '}, {'emotion': 'Fear', 'intensity': '3', 'reason': 'the image looks like a headshot of a gunman'}, {'emotion': 'Disgust', 'intensity': '4', 'reason': "its a mug shot of an active shooter. He took lives he didn't have to take."}, {'emotion': 'Fear', 'intensity': '3', 'reason': 'it looks like a mugshot and he looks scary'}, {…
680	Mother of Thousand Oaks Victim: I Don t Want Prayers. I Don t Want Thoughts. I Want Gun Control.	anonymous-source/all_shooting_images_newest/110241.jpg	[{'emotion': 'Contentment', 'intensity': '3', 'reason': 'the people looks so united and i feel content for the unity the have '}, {'emotion': 'Sadness', 'intensity': '1', 'reason': "it seems that people are grieving over a tragedy caused by gun violence but I can't be sure that is what this event is which is why it is mild"}, {'emotion': 'Sadness', 'intensity': '4', 'reason': 'people have been lo…
683	Plastic 3D guns printed at home will raise threat level for everyone, especially Congress	anonymous-source/all_shooting_images_newest/110.jpg	[{'emotion': 'Amusement', 'intensity': '1', 'reason': 'looks like a toy '}, {'emotion': 'Fear', 'intensity': '4', 'reason': 'it worries me that there is a plastic model of a gun'}, {'emotion': 'Sadness', 'intensity': '3', 'reason': 'guns are becoming too accessible'}, {'emotion': 'Fear', 'intensity': '4', 'reason': '3d printed guns seem to becoming more popular. '}, {'emotion': 'Fear', 'intensity…
688	This Is Us Honors Victims of Pittsburgh Synagogue Shooting	anonymous-source/all_shooting_images_newest/100136.jpg	[{'emotion': 'Sadness', 'intensity': '3', 'reason': "the guy's eyes look very sad and i feel for him "}, {'emotion': 'Sadness', 'intensity': '1', 'reason': "I don't really feel anything because there is no context to who this man is"}, {'emotion': 'Contentment', 'intensity': '3', 'reason': 'no clue who this is? so no reaction'}, {'emotion': 'Sadness', 'intensity': '1', 'reason': 'what does this m…
689	Robert Bowers, alleged Pittsburgh synagogue gunman, left trail of chilling, anti-Semitic social media posts	anonymous-source/all_shooting_images_newest/100448.jpg	[{'emotion': 'Sadness', 'intensity': '3', 'reason': 'this guy looks like a lost elderly and i feel sad for him and the family that lost him '}, {'emotion': 'Anger', 'intensity': '1', 'reason': 'it seems like a potential headshot of a gunman but there is also no context so it may be a victim'}, {'emotion': 'Contentment', 'intensity': '3', 'reason': 'no clue who this is and am unsure if it is a vic…
690	It's a Twitter war: Doctors clash with NRA over gun deaths	anonymous-source/all_shooting_images_newest/110244.jpg	[{'emotion': 'Awe', 'intensity': '3', 'reason': 'it looks like the women is showing her family picture to someone, and the picture looks cute '}, {'emotion': 'Sadness', 'intensity': '5', 'reason': "it is tragic to see people's families being broken by gun violence"}, {'emotion': 'Sadness', 'intensity': '5', 'reason': 'people of color are targeted too much. They are being killed in masses due to r…
693	Gun Rights Activists Defy Court Ruling, Post 3D-Printed Gun Blueprints Online	anonymous-source/all_shooting_images_newest/114.jpg	[{'emotion': 'Amusement', 'intensity': '3', 'reason': 'toy guns '}, {'emotion': 'Fear', 'intensity': '3', 'reason': 'I am worried that there is models of guns that look like toys'}, {'emotion': 'Sadness', 'intensity': '3', 'reason': 'guns are becoming too accessible.'}, {'emotion': 'Fear', 'intensity': '3', 'reason': 'based on the writing in the back it seems like the 3d printed guns have become …
694	I voted against an assault weapons ban. Here s why I changed my mind.	anonymous-source/all_shooting_images_newest/100331.jpg	[{'emotion': 'Fear', 'intensity': '3', 'reason': 'gun selling is scary '}, {'emotion': 'Anger', 'intensity': '3', 'reason': 'I am upset that assault weapons are so accessible '}, {'emotion': 'Fear', 'intensity': '4', 'reason': 'of how easy it is to buy an automatic gun.'}, {'emotion': 'Disgust', 'intensity': '5', 'reason': 'why are there sales on weapons. that seems so stupid. '}, {'emotion': 'Fe…
696	Esports Organizers Criticize USA Gun Laws After Shooting at Madden 19 Tournament	anonymous-source/all_shooting_images_newest/221.jpg	[{'emotion': 'Excitement', 'intensity': '1', 'reason': 'something is happening '}, {'emotion': 'Fear', 'intensity': '3', 'reason': 'I feel worried because it seems like a crime scene'}, {'emotion': 'Sadness', 'intensity': '2', 'reason': 'it looks like an active shooting scene. I feel bad if someone died.'}, {'emotion': 'Sadness', 'intensity': '3', 'reason': 'it seems like a shooting had just happ…
699	Alleged Kroger gunman uttered, 'whites don't kill whites,' witness says	anonymous-source/all_shooting_images_newest/100303.jpg	[{'emotion': 'Contentment', 'intensity': '3', 'reason': 'This man is clearly in jail for committing acts of gun violence '}, {'emotion': 'Fear', 'intensity': '3', 'reason': 'ikr'}, {'emotion': 'Contentment', 'intensity': '4', 'reason': 'it is good that this shooter is in jail for his terrible wrongdoings.'}, {'emotion': 'Fear', 'intensity': '3', 'reason': "man's stare is soul piercing, and has cr…
703	Jacksonville mass killing once again proves the left s gun control solution is a fleeting illusion	anonymous-source/all_shooting_images_newest/37.jpg	[{'emotion': 'Contentment', 'intensity': '3', 'reason': 'this gun seems to have a tag alluding to the fact there are gun restrictions '}, {'emotion': 'Anger', 'intensity': '3', 'reason': 'gun should only be owned by qualified people'}, {'emotion': 'Fear', 'intensity': '5', 'reason': 'It is again scary that anyone can buy a gun.'}, {'emotion': 'Fear', 'intensity': '3', 'reason': 'easily accessible…
704	Does the U.S. lead the world in mass shootings?	anonymous-source/all_shooting_images_newest/90350.jpg	[{'emotion': 'Disgust', 'intensity': '3', 'reason': 'there is just no need for that many guns'}, {'emotion': 'Anger', 'intensity': '3', 'reason': 'gun should only be owned by qualified people'}, {'emotion': 'Fear', 'intensity': '5', 'reason': 'It is again scary that anyone can buy a gun.'}, {'emotion': 'Disgust', 'intensity': '3', 'reason': 'a mass array of firearms '}, {'emotion': 'Fear', 'inten…
710	Another day of funerals as Pittsburgh mourns synagogue shooting victims	anonymous-source/all_shooting_images_newest/110143.jpg	[{'emotion': 'Awe', 'intensity': '5', 'reason': 'this is a picture that really shows America still has some humanity left '}, {'emotion': 'Sadness', 'intensity': '3', 'reason': 'what a person'}, {'emotion': 'Sadness', 'intensity': '3', 'reason': "I do not necessarily what is going on here, but I'm guessing the people in the image are victims of shootings, which brings me much sadness."}, {'emotio…
714	California Gov. Jerry Brown signs bill banning gun sales to people under 21	anonymous-source/all_shooting_images_newest/90370.jpg	[{'emotion': 'Sadness', 'intensity': '3', 'reason': "I don't understand why these men are interested in buying guns"}, {'emotion': 'Excitement', 'intensity': '3', 'reason': 'gun should be banned '}, {'emotion': 'Fear', 'intensity': '4', 'reason': 'It is again scary that anyone can buy a gun.'}, {'emotion': 'Fear', 'intensity': '3', 'reason': 'group of teenagers looking for the perfect firearm to …
719	Parkland Shooting Suspect Lost Special-Needs Help at School When He Needed It Most	anonymous-source/all_shooting_images_newest/457.jpg	[{'emotion': 'Fear', 'intensity': '4', 'reason': "this young man's eye seems to be angry and glare at someone he does not like. He wants to kill someone."}, {'emotion': 'Anger', 'intensity': '3', 'reason': 'he is a school shooter who killed innocent people'}, {'emotion': 'Fear', 'intensity': '2', 'reason': 'what he might have done angers and scares me. '}, {'emotion': 'Contentment', 'intensity': …
724	NRA sues Florida over plan to put age limits on rifle purchases	anonymous-source/all_shooting_images_newest/10305.jpg	[{'emotion': 'Fear', 'intensity': '4', 'reason': "It's like in a shop, which means everyone can buy guns. It makes me feel fearful because I feel insecure. "}, {'emotion': 'Fear', 'intensity': '3', 'reason': 'Those are scary guns that no one should own except for the military '}, {'emotion': 'Fear', 'intensity': '2', 'reason': 'no clue what he will do with the gun'}, {'emotion': 'Fear', 'intensit…
726	Protesters say security guard Jemel Roberson was proverbial 'good guy with a gun' but was fatally shot by police anyway - Daily Southtown	anonymous-source/all_shooting_images_newest/110197.jpg	[{'emotion': 'Anger', 'intensity': '2', 'reason': 'Since people in the picture are black people. I think there are something related to gun use and racism. I feel angry and unfair about it.'}, {'emotion': 'Sadness', 'intensity': '3', 'reason': 'Innocent people died'}, {'emotion': 'Sadness', 'intensity': '4', 'reason': 'disappointed in society and sad for what happened'}, {'emotion': 'Amusement', …
733	Trump's indefensible response to the synagogue shooting draws outrage	anonymous-source/all_shooting_images_newest/100095.jpg	[{'emotion': 'Sadness', 'intensity': '2', 'reason': 'With police stand by, i feel someone use gun, or someone is hurt by guns.'}, {'emotion': 'Sadness', 'intensity': '3', 'reason': 'Looks like a shooting/hate crime'}, {'emotion': 'Fear', 'intensity': '2', 'reason': 'police in scene so after crime but ambulance concerns me'}, {'emotion': 'Sadness', 'intensity': '1', 'reason': "someone must've died…
734	I now actually do want to take your guns. All of your guns. Right now, magazine editor declares	anonymous-source/all_shooting_images_newest/10316.jpg	[{'emotion': 'Fear', 'intensity': '2', 'reason': 'i feel so insecure with so many guns probably put in a shop. I am a afraid that people buy them and hurt others.'}, {'emotion': 'Disgust', 'intensity': '3', 'reason': "Shotguns aren't needed"}, {'emotion': 'Disgust', 'intensity': '2', 'reason': 'not clear what the guns are for'}, {'emotion': 'Disgust', 'intensity': '1', 'reason': 'this store posse…
736	Vigil held for victims of California bar shooting	anonymous-source/all_shooting_images_newest/110235.jpg	[{'emotion': 'Sadness', 'intensity': '4', 'reason': 'Because someone hug each other. I feel something bad may happen because of gun violence, and people are trying to console each other a little bit.'}, {'emotion': 'Fear', 'intensity': '3', 'reason': 'Nothing, not sure what is happening.'}, {'emotion': 'Sadness', 'intensity': '4', 'reason': 'sad for victim and family'}, {'emotion': 'Amusement', '…
737	The NRA is using Trump s playbook to attack the news media. It must be getting desperate.	anonymous-source/all_shooting_images_newest/10601.jpg	[{'emotion': 'Awe', 'intensity': '4', 'reason': 'First, she is a woman. I feel she is courageous and excellent. Second, I feel she is working hard to spread the ideas.'}, {'emotion': 'Contentment', 'intensity': '1', 'reason': 'Nothing, not sure what is happening.'}, {'emotion': 'Excitement', 'intensity': '2', 'reason': 'public figure announcing against guns '}, {'emotion': 'Amusement', 'intensity…
739	Police: Florida man threatened to shoot 'weak Republicans' who voted against Kavanaugh confirmation	anonymous-source/all_shooting_images_newest/100252.jpg	[{'emotion': 'Fear', 'intensity': '2', 'reason': 'I do not know this person, the events, nor the circumstances.'}, {'emotion': 'Fear', 'intensity': '2', 'reason': 'he looks mad and aggressive, might hurt somebody'}, {'emotion': 'Sadness', 'intensity': '3', 'reason': ','}, {'emotion': 'Fear', 'intensity': '3', 'reason': 'This seems like a image of a shooting suspect.'}, {'emotion': 'Fear', 'intens…
740	Unbearable grief': Pakistani parents of Santa Fe school shooting victim warn of gun culture in US	anonymous-source/all_shooting_images_newest/110117.jpg	[{'emotion': 'Sadness', 'intensity': '3', 'reason': 'I perceive mourning and so feel sympathetic to their possible situation. '}, {'emotion': 'Sadness', 'intensity': '3', 'reason': "They look very sad, I'm sorry to hear that."}, {'emotion': 'Sadness', 'intensity': '3', 'reason': '.'}, {'emotion': 'Sadness', 'intensity': '3', 'reason': 'It seems like they have loss someone close in shooting.'}, {'…
741	Once a 'proud NRA sellout,' Putnam won't say if he'd use term again	anonymous-source/all_shooting_images_newest/10669.jpg	[{'emotion': 'Amusement', 'intensity': '1', 'reason': 'I do not know this person but his tie choice is interesting.'}, {'emotion': 'Awe', 'intensity': '1', 'reason': 'he looks like talk something serious'}, {'emotion': 'Sadness', 'intensity': '3', 'reason': '.'}, {'emotion': 'Awe', 'intensity': '3', 'reason': 'I wonder what his take is on gun control.'}, {'emotion': 'Awe', 'intensity': '1', 'reas…
742	New Jersey governor proposes strengthening gun laws after Pittsburgh synagogue mass shooting	anonymous-source/all_shooting_images_newest/100005.jpg	[{'emotion': 'Amusement', 'intensity': '1', 'reason': 'His forehead is huge.'}, {'emotion': 'Awe', 'intensity': '2', 'reason': 'he looks like talk something serious'}, {'emotion': 'Sadness', 'intensity': '3', 'reason': '.'}, {'emotion': 'Awe', 'intensity': '3', 'reason': 'I wonder what he is saying, he seems like making a serious claim.'}, {'emotion': 'Awe', 'intensity': '2', 'reason': 'he looks …
743	Don't panic about 3D gun printing. Yet.	anonymous-source/all_shooting_images_newest/27.jpg	[{'emotion': 'Amusement', 'intensity': '1', 'reason': "It looks like a little toy gun but I'm not really sure what it is"}, {'emotion': 'Fear', 'intensity': '1', 'reason': 'It looks like a 3D printed gun'}, {'emotion': 'Sadness', 'intensity': '3', 'reason': '.'}, {'emotion': 'Fear', 'intensity': '3', 'reason': '3D printing for gun is just resulting in looser gun control.'}, {'emotion': 'Fear', 'i…
745	David Hogg touts gun reforms in Pennsylvania: The young people will win	anonymous-source/all_shooting_images_newest/100400.jpg	[{'emotion': 'Awe', 'intensity': '1', 'reason': 'I feel very out of touch as I cannot seem to recognize anything about the image and so feel mostly nothing'}, {'emotion': 'Awe', 'intensity': '1', 'reason': 'He appears to be conducting a serious interview.'}, {'emotion': 'Sadness', 'intensity': '3', 'reason': '.'}, {'emotion': 'Contentment', 'intensity': '3', 'reason': 'He might be making his stan…
747	NRA president dropped from GOP rally in city hit by school shooting | TheHill	anonymous-source/all_shooting_images_newest/110113.jpg	[{'emotion': 'Awe', 'intensity': '1', 'reason': "I feel nothing as I do not know who I'm looking at."}, {'emotion': 'Awe', 'intensity': '2', 'reason': "He looks like he's giving a serious speech"}, {'emotion': 'Sadness', 'intensity': '3', 'reason': '.'}, {'emotion': 'Awe', 'intensity': '3', 'reason': 'I wonder what he is saying about gun control.'}, {'emotion': 'Awe', 'intensity': '2', 'reason': …
748	How a Seattle nun led a shareholder revolt against gun makers	anonymous-source/all_shooting_images_newest/90485.jpg	[{'emotion': 'Contentment', 'intensity': '1', 'reason': 'An image of a sweet-looking elderly woman always gives warm feelings.'}, {'emotion': 'Awe', 'intensity': '2', 'reason': 'This serious elder must have done something big'}, {'emotion': 'Sadness', 'intensity': '3', 'reason': '.'}, {'emotion': 'Contentment', 'intensity': '3', 'reason': 'This seems like a post that will be against bearing arms.…
749	Kentucky grocery store gunman reportedly told bystander 'whites don't shoot whites'	anonymous-source/all_shooting_images_newest/100260.jpg	[{'emotion': 'Fear', 'intensity': '1', 'reason': 'The terribly shot image makes the subject look threatening and so alarms me.'}, {'emotion': 'Fear', 'intensity': '2', 'reason': 'He looks irritable and gets out of control'}, {'emotion': 'Sadness', 'intensity': '3', 'reason': '.'}, {'emotion': 'Fear', 'intensity': '3', 'reason': 'This image looks like a picture of a shooting suspect, which is real…
750	Suspect arrested in Alabama mall shooting; protests continue Associated Press	anonymous-source/all_shooting_images_newest/110118.jpg	[{'emotion': 'Sadness', 'intensity': '5', 'reason': 'Fallen soldiers make me sad as they are mostly children sent to die by the rich folk.'}, {'emotion': 'Sadness', 'intensity': '1', 'reason': 'They look very sad and it affects me too'}, {'emotion': 'Sadness', 'intensity': '3', 'reason': '.'}, {'emotion': 'Sadness', 'intensity': '3', 'reason': 'they seem like family of victims of mass shooting.'}…
752	Mike Pence Is Under Fire for Appearing with a Fake Rabbi to Commemorate the Pittsburgh Shooting	anonymous-source/all_shooting_images_newest/100013.jpg	[{'emotion': 'Amusement', 'intensity': '1', 'reason': "I remember him as Trump's right hand and I always thought he looked funny."}, {'emotion': 'Awe', 'intensity': '1', 'reason': 'He looks serious and gestures intimidatingly'}, {'emotion': 'Sadness', 'intensity': '3', 'reason': '.'}, {'emotion': 'Awe', 'intensity': '3', 'reason': "I wonder what is the government's stand on gun control issues."},…
753	3D-printed gun maker says he's selling blueprints, despite court order against him	anonymous-source/all_shooting_images_newest/36.jpg	[{'emotion': 'Awe', 'intensity': '1', 'reason': "Looks like a 3D printed gun to me. I'd be very impressed if it were functional for more than one round."}, {'emotion': 'Fear', 'intensity': '1', 'reason': 'This is a 3D printed gun that anyone can make'}, {'emotion': 'Sadness', 'intensity': '3', 'reason': '.'}, {'emotion': 'Fear', 'intensity': '3', 'reason': '3D printing gun is making gun control h…
754	California Gov. Jerry Brown signs bill banning gun sales to people under 21, citing Parkland	anonymous-source/all_shooting_images_newest/90282.jpg	[{'emotion': 'Excitement', 'intensity': '5', 'reason': 'I am excited to own my first rifle and seeing so many in stock is exciting.'}, {'emotion': 'Fear', 'intensity': '1', 'reason': 'The walls are covered with weapons that can easily kill humans'}, {'emotion': 'Sadness', 'intensity': '3', 'reason': '.'}, {'emotion': 'Fear', 'intensity': '3', 'reason': 'It is just scary to see guns all laid out l…
763	U.S. judge extends ban of online 3-D printed gun blueprints	anonymous-source/all_shooting_images_newest/260.jpg	[{'emotion': 'Disgust', 'intensity': '3', 'reason': 'I do not things guns should be portrayed like toys'}, {'emotion': 'Sadness', 'intensity': '3', 'reason': "These look like gun toys to me and reminds me of how parents buy these gun toys for boys when they are little. Violence is embedded into children's minds when they were little, especially for boys. But there is nothing we can do about it, s…
765	Texas school gunman 'confused,' his lawyers say	anonymous-source/all_shooting_images_newest/10209.jpg	[{'emotion': 'Sadness', 'intensity': '3', 'reason': 'This is a cemetery implying death '}, {'emotion': 'Sadness', 'intensity': '4', 'reason': 'All I see are lives lost due to gun violence and that is just supper sad to think about. '}, {'emotion': 'Sadness', 'intensity': '4', 'reason': 'I feel sorry for people dead from gun violence'}, {'emotion': 'Sadness', 'intensity': '4', 'reason': 'its sad t…
769	Michigan man to be sentenced for shooting at lost black teen	anonymous-source/all_shooting_images_newest/110503.jpg	[{'emotion': 'Fear', 'intensity': '3', 'reason': 'Not sure what this image is but the man looks like he is wearing prison attire '}, {'emotion': 'Sadness', 'intensity': '4', 'reason': 'This guys looks poor, old, and sad. Looks like he just lost someone due to gun violence. '}, {'emotion': 'Contentment', 'intensity': '3', 'reason': 'criminals are getting punished'}, {'emotion': 'Sadness', 'intensi…
774	Protesters march on Lake Shore Drive to call attention to gun violence	anonymous-source/all_shooting_images_newest/231.jpg	[{'emotion': 'Awe', 'intensity': '3', 'reason': 'I admire there ability to stand up for what they believe in '}, {'emotion': 'Excitement', 'intensity': '3', 'reason': 'The protest shows to me that people care about this issue and is willing to make a change. '}, {'emotion': 'Excitement', 'intensity': '5', 'reason': 'I want to join them '}, {'emotion': 'Excitement', 'intensity': '2', 'reason': 'im…
775	Parkland students sent letter of support from Dunblane shooting massacre survivors	anonymous-source/all_shooting_images_newest/10221.jpg	[{'emotion': 'Sadness', 'intensity': '3', 'reason': 'This seems like a memorial '}, {'emotion': 'Awe', 'intensity': '4', 'reason': 'wow this just warms my heart. I see that people do care about each other and that there is love. '}, {'emotion': 'Sadness', 'intensity': '4', 'reason': 'I feel sorry for victims of gun violence'}, {'emotion': 'Sadness', 'intensity': '4', 'reason': 'its sad to think p…
776	Synagogue gunman kills 11 in America's worst anti-Semitic attack	anonymous-source/all_shooting_images_newest/100069.jpg	[{'emotion': 'Sadness', 'intensity': '3', 'reason': 'Sad because someone is hurt'}, {'emotion': 'Sadness', 'intensity': '4', 'reason': 'This looks like the scene of gun violence, which made me think about death and loss, especially with the presence of an ambulance. '}, {'emotion': 'Fear', 'intensity': '3', 'reason': 'people are getting hurt from gun violence'}, {'emotion': 'Fear', 'intensity': '…
779	New Mexico Compound: Alleged Muslim Extremists Who Trained Children to Carry Out School Shootings Have Charges Dropped	anonymous-source/all_shooting_images_newest/135.jpg	[{'emotion': 'Fear', 'intensity': '3', 'reason': 'Extremist charges are necessary and should not be dropped'}, {'emotion': 'Anger', 'intensity': '3', 'reason': 'it depicts a man in a mugshot with no context so it forces us to automatically villify him'}, {'emotion': 'Fear', 'intensity': '3', 'reason': 'This mugshot makes me feel fear and very uneasy.'}, {'emotion': 'Fear', 'intensity': '3', 'reas…
780	For Parents of Shooting Victims, a Support Network That Keeps Growing	anonymous-source/all_shooting_images_newest/10483.jpg	[{'emotion': 'Sadness', 'intensity': '3', 'reason': "Society should give more protection to the victims' families, which is essential for social stability"}, {'emotion': 'Awe', 'intensity': '3', 'reason': 'she just looks so calm but also powerful with the lighting on her.'}, {'emotion': 'Sadness', 'intensity': '1', 'reason': 'This woman seem to be the survivor of gun violence. I am sad for the po…
781	Waffle House Shooting Hero Still Hasn't Heard From Donald Trump	anonymous-source/all_shooting_images_newest/10471.jpg	[{'emotion': 'Disgust', 'intensity': '3', 'reason': "Trump's approach does not meet public expectations"}, {'emotion': 'Disgust', 'intensity': '3', 'reason': "any picture of Trump makes me incredibly uncomfortable because of what he's known for."}, {'emotion': 'Amusement', 'intensity': '1', 'reason': "I am amused by former president Trump's facial expression, however also angry as the media often…
785	Florida Senate rejects ban on assault weapons, votes to arm teachers	anonymous-source/all_shooting_images_newest/10642.jpg	[{'emotion': 'Contentment', 'intensity': '3', 'reason': 'Assault weapons are so dangerous to society that they need to be banned, not given to teachers to use'}, {'emotion': 'Excitement', 'intensity': '3', 'reason': "although I don't know what they are protesting, it's exciting to see people fighting for what they believe in."}, {'emotion': 'Excitement', 'intensity': '4', 'reason': 'Whether this …
786	Las Vegas shooting victims honored in emotional anniversary ceremony: 'Our 58 angels are with us'	anonymous-source/all_shooting_images_newest/100497.jpg	[{'emotion': 'Sadness', 'intensity': '3', 'reason': 'The victims were unable to see this recognition, and their deaths add more evidence to the topic of managing the gun problem'}, {'emotion': 'Sadness', 'intensity': '3', 'reason': "I know it's related to the Vegas shooting and that shooting is heartbreaking."}, {'emotion': 'Sadness', 'intensity': '4', 'reason': 'This image is certainly about the…
789	Jenelle Evans lies about pulling a gun after road rage incident, threatens to leave Teen Mom 2	anonymous-source/all_shooting_images_newest/147.jpg	[{'emotion': 'Anger', 'intensity': '3', 'reason': "Guns can't be an emotional catharsis, we need stricter gun control"}, {'emotion': 'Fear', 'intensity': '3', 'reason': "I don't know what's about to happen next and I think that I see a gun, which is scaring me."}, {'emotion': 'Awe', 'intensity': '2', 'reason': 'I am shocked to see the image of the girl pulling out what seems to be a gun from her …
793	America's increasing moral panic over active shooters is overblown and counterproductive	anonymous-source/all_shooting_images_newest/444.jpg	[{'emotion': 'Fear', 'intensity': '3', 'reason': "It turns out that many American shooters don't know how to use guns in a controlled manner, and their practices have caused panic"}, {'emotion': 'Fear', 'intensity': '3', 'reason': 'who knows the situation that they are possibly preparing for and it makes me anxious.'}, {'emotion': 'Fear', 'intensity': '2', 'reason': 'This police officers in the i…
795	Why some schools are suspending kids for joining gun control walkouts	anonymous-source/all_shooting_images_newest/10661.jpg	[{'emotion': 'Anger', 'intensity': '3', 'reason': 'We have a responsibility to let our children know about the dangers of firearms, and schools should give them more guidance in this area rather than discourage them\r\n\r\n'}, {'emotion': 'Sadness', 'intensity': '3', 'reason': "a young girl is protesting against something on her own which is just heartbreaking because she's so young."}, {'emotion…
796	Temple Israel, Gary community mourns Pittsburgh shooting victims: 'We come together to condemn the violence and hate'	anonymous-source/all_shooting_images_newest/110007.jpg	[{'emotion': 'Sadness', 'intensity': '3', 'reason': 'Violence and hatred should be condemned, it is not good for human development'}, {'emotion': 'Sadness', 'intensity': '3', 'reason': 'I feel like this could be for some type of funeral because of the candles so it makes me sad for anyone who was lost.'}, {'emotion': 'Sadness', 'intensity': '2', 'reason': 'It is sad to see this image as this seem…
797	NRA spokeswoman pushes back on raising age for buying semiautomatic rifles, an idea Trump has suggested	anonymous-source/all_shooting_images_newest/10216.jpg	[{'emotion': 'Anger', 'intensity': '3', 'reason': 'The gun problem is age-related but cannot be limited by initiatives to raise the purchase age alone, as this does not address the root of the problem'}, {'emotion': 'Disgust', 'intensity': '3', 'reason': 'I saw the word conservative and just immediately felt uneasy.'}, {'emotion': 'Contentment', 'intensity': '4', 'reason': 'This woman have a very…
803	Calstrs to Engage With Assault-Weapon Sellers First, Divest Last	anonymous-source/all_shooting_images_newest/10063.jpg	[{'emotion': 'Disgust', 'intensity': '3', 'reason': 'people collect guns'}, {'emotion': 'Disgust', 'intensity': '3', 'reason': 'people collect guns'}, {'emotion': 'Anger', 'intensity': '4', 'reason': 'Guns are weapons of mass destruction and they should not be displayed like toys, this makes me angry. '}, {'emotion': 'Fear', 'intensity': '3', 'reason': 'harmful weapons'}, {'emotion': 'Fear', 'int…
804	People across the country come together to condemn gun violence Video	anonymous-source/all_shooting_images_newest/10227.jpg	[{'emotion': 'Excitement', 'intensity': '4', 'reason': 'people are taking a stand'}, {'emotion': 'Excitement', 'intensity': '4', 'reason': 'people are taking a stand'}, {'emotion': 'Awe', 'intensity': '4', 'reason': 'I am proud of the organization March for Our Lives and I am so proud to witness everything they have done. '}, {'emotion': 'Excitement', 'intensity': '3', 'reason': 'looks happy'}, {…
805	Pittsburgh Steelers to hold moment of silence to honor victims of synagogue shooting	anonymous-source/all_shooting_images_newest/100151.jpg	[{'emotion': 'Sadness', 'intensity': '4', 'reason': 'too many lives lost'}, {'emotion': 'Sadness', 'intensity': '4', 'reason': 'too many lives lost'}, {'emotion': 'Sadness', 'intensity': '4', 'reason': 'This image makes me feel sad because I am assuming it is a memorial to those who have lost their lives to gun violence.'}, {'emotion': 'Sadness', 'intensity': '3', 'reason': 'someone died'}, {'emo…
807	Texas state lawmaker shares image linking gun control to the Holocaust	anonymous-source/all_shooting_images_newest/10530.jpg	[{'emotion': 'Sadness', 'intensity': '3', 'reason': 'of how true this is'}, {'emotion': 'Sadness', 'intensity': '3', 'reason': 'of how true this is'}, {'emotion': 'Sadness', 'intensity': '4', 'reason': 'it seems like there is nothing we can do to fight for stricter gun reform and that history is bound to repeat itself which makes me sad. '}, {'emotion': 'Sadness', 'intensity': '3', 'reason': 'som…
809	How America s hunting culture shaped masculinity, environmentalism, and the NRA	anonymous-source/all_shooting_images_newest/10688.jpg	[{'emotion': 'Disgust', 'intensity': '4', 'reason': 'people shoot animals for fun'}, {'emotion': 'Disgust', 'intensity': '4', 'reason': 'people shoot animals for fun'}, {'emotion': 'Anger', 'intensity': '5', 'reason': 'This image makes me angry because children are being taught to use violent weapons which is completely unnecessary. '}, {'emotion': 'Fear', 'intensity': '3', 'reason': 'killing'}, …
813	Limited engagement: Top funds backed gunmaker Ruger board despite no talks	anonymous-source/all_shooting_images_newest/88.jpg	[{'emotion': 'Fear', 'intensity': '4', 'reason': 'The guns and the focus on triggers create a feeling of high pressure.'}, {'emotion': 'Contentment', 'intensity': '3', 'reason': "it's just a picture of a bunch of guns with no context"}, {'emotion': 'Fear', 'intensity': '1', 'reason': "That's a lot of guns."}, {'emotion': 'Fear', 'intensity': '3', 'reason': 'I feel fear.'}, {'emotion': 'Excitement…
823	Warning signs may have been missed in school shooting case	anonymous-source/all_shooting_images_newest/10790.jpg	[{'emotion': 'Fear', 'intensity': '4', 'reason': 'Why would you need all those weapons in your bedroom? sick'}, {'emotion': 'Fear', 'intensity': '5', 'reason': 'The fact that someone can acquire that many guns is very scary. Also, the fact that the picture is taken so casually, with the guns appearing to be on a bed, is scary to me as well.'}, {'emotion': 'Sadness', 'intensity': '3', 'reason': '.…
825	HIAS, the Jewish Agency Criticized by the Shooting Suspect, Has a History of Aiding Refugees	anonymous-source/all_shooting_images_newest/100045.jpg	[{'emotion': 'Sadness', 'intensity': '4', 'reason': 'how many people do we have to lose before people change'}, {'emotion': 'Sadness', 'intensity': '3', 'reason': "I'm very saddened about the number of people who lost their lives due to shootings."}, {'emotion': 'Sadness', 'intensity': '3', 'reason': '.'}, {'emotion': 'Sadness', 'intensity': '4', 'reason': 'the loss, and the child and man'}, {'em…
827	Companies develop bulletproof clothing to protect against shootings	anonymous-source/all_shooting_images_newest/10506.jpg	[{'emotion': 'Disgust', 'intensity': '4', 'reason': "why would you ever practice shooting a target that looks real (unless you're in the military)"}, {'emotion': 'Fear', 'intensity': '3', 'reason': 'I know a lot of these dummies are used for police officers when training, but it is scary that anyone could practice on shooting.'}, {'emotion': 'Sadness', 'intensity': '3', 'reason': '.'}, {'emotion'…
829	BlackRock and Vanguard fought for gun changes yet rubber stamped Sturm Ruger's board	anonymous-source/all_shooting_images_newest/163.jpg	[{'emotion': 'Disgust', 'intensity': '3', 'reason': "guns shouldn't be romanticized or casually sold and positively marketed. "}, {'emotion': 'Fear', 'intensity': '5', 'reason': "It's scary that in some countries, anyone can buy that gun."}, {'emotion': 'Sadness', 'intensity': '3', 'reason': '.'}, {'emotion': 'Fear', 'intensity': '3', 'reason': 'guns'}, {'emotion': 'Fear', 'intensity': '3', 'reas…
833	Gun Maker Remington Plans to File for Bankruptcy Protection	anonymous-source/all_shooting_images_newest/10834.jpg	[{'emotion': 'Disgust', 'intensity': '3', 'reason': 'guns shouldn\'t be romanticized (this is "artsy")'}, {'emotion': 'Fear', 'intensity': '5', 'reason': 'again, it is very scary that anyone could own this gun and use it without a license.'}, {'emotion': 'Sadness', 'intensity': '3', 'reason': '.'}, {'emotion': 'Fear', 'intensity': '2', 'reason': 'looks like a shooting gun used'}, {'emotion': 'Awe…
834	N.Y. governor says schools should drop any punishment given to kids who joined gun violence protests	anonymous-source/all_shooting_images_newest/10204.jpg	[{'emotion': 'Sadness', 'intensity': '3', 'reason': 'is this a school protest or a walkout because someone has made a throat?'}, {'emotion': 'Sadness', 'intensity': '5', 'reason': 'this was probably an image from the evacuation of a school shooting and it is sad to see that the drills and regulations we set in place for this potential occurrence could actually happen.'}, {'emotion': 'Sadness', 'i…
835	Muslim Americans raise more than $200,000 for those affected by Pittsburgh synagogue shooting	anonymous-source/all_shooting_images_newest/100051.jpg	[{'emotion': 'Sadness', 'intensity': '3', 'reason': 'non white people are more of a target for gun violence '}, {'emotion': 'Sadness', 'intensity': '4', 'reason': "It's sad that people of specific religions and cultures are judged and disliked due to shootings and trauma caused by people of those same psychographics."}, {'emotion': 'Sadness', 'intensity': '3', 'reason': '.'}, {'emotion': 'Sadness…
856	Florida city official charged with murder after state rejects 'stand your ground' shooting of suspected thief	anonymous-source/all_shooting_images_newest/100432.jpg	[{'emotion': 'Fear', 'intensity': '3', 'reason': 'gun is causing threat and danger to people'}, {'emotion': 'Fear', 'intensity': '3', 'reason': 'I am scared for what is happening. '}, {'emotion': 'Fear', 'intensity': '3', 'reason': 'I am scared to look at this photo, someone clearly got injured '}, {'emotion': 'Fear', 'intensity': '3', 'reason': 'N/A'}, {'emotion': 'Fear', 'intensity': '3', 'reas…
858	Mom with 'gut feeling' stops school shooter before planned attack	anonymous-source/all_shooting_images_newest/100374.jpg	[{'emotion': 'Contentment', 'intensity': '3', 'reason': '.'}, {'emotion': 'Contentment', 'intensity': '3', 'reason': 'I am glad to see them happy'}, {'emotion': 'Awe', 'intensity': '4', 'reason': 'cute family photo '}, {'emotion': 'Contentment', 'intensity': '3', 'reason': 'N/A'}, {'emotion': 'Contentment', 'intensity': '1', 'reason': 'this is a cute family but I do not know how it relates to gun…
860	Somber tributes, dimmed lights on Vegas shooting anniversary	anonymous-source/all_shooting_images_newest/100435.jpg	[{'emotion': 'Sadness', 'intensity': '2', 'reason': 'In the context, this feels like the tragic aftermath of a violent event where those who were affected are still coming to terms with what just happened.'}, {'emotion': 'Sadness', 'intensity': '3', 'reason': 'this girl seems to be the same age as me and seeing her witnessing a crime scene and just sitting there looking traumatized makes me feel …
862	California governor signs raft of gun control bills into law	anonymous-source/all_shooting_images_newest/90422.jpg	[{'emotion': 'Contentment', 'intensity': '1', 'reason': 'I do not know the person pictured or the message they are trying to convey.'}, {'emotion': 'Contentment', 'intensity': '1', 'reason': "same as sample 3, I don't know this dude and I don't feel anything when the politicians are making public announcements."}, {'emotion': 'Sadness', 'intensity': '1', 'reason': 'not sure what is going on'}, {'…
863	Carrying a gun is a privilege regardless of whether you're a civilian or a police officer - Chicago Tribune	anonymous-source/all_shooting_images_newest/110460.jpg	[{'emotion': 'Fear', 'intensity': '1', 'reason': 'general associations with police gun violence.'}, {'emotion': 'Fear', 'intensity': '3', 'reason': "this image just reminds me of George Floyd's case from the middle of nowhere. "}, {'emotion': 'Fear', 'intensity': '1', 'reason': 'not sure what it is'}, {'emotion': 'Fear', 'intensity': '2', 'reason': 'i am hoping that whoever is carrying that gun u…
865	Generation Z reported the most mental health problems, and gun violence is the biggest stressor	anonymous-source/all_shooting_images_newest/100017.jpg	[{'emotion': 'Sadness', 'intensity': '1', 'reason': 'sympathy for the children who worry about the possibility of gun violence in their lives.'}, {'emotion': 'Contentment', 'intensity': '3', 'reason': 'just by looking at their facial expressions, they have so many more to say beyond the printed words "stop gun violence." '}, {'emotion': 'Contentment', 'intensity': '5', 'reason': 'agree with the i…
866	Grief and Self-Doubt Follow Shooting at Trenton Arts Festival	anonymous-source/all_shooting_images_newest/10450.jpg	[{'emotion': 'Fear', 'intensity': '1', 'reason': 'implies the proximity of possible violent events to our daily lives and gathering spaces.'}, {'emotion': 'Fear', 'intensity': '3', 'reason': "this image just gives me the feel of crime scenes is so close to everyone, and we can't even spot the potential violence that might happen."}, {'emotion': 'Sadness', 'intensity': '5', 'reason': 'feel like a …
869	Woman Who Reported Racist Facebook Message May Have Prevented a School Shooting	anonymous-source/all_shooting_images_newest/100213.jpg	[{'emotion': 'Fear', 'intensity': '1', 'reason': 'looking into the eyes of what is assumed to be a perpetrator of gun violence.'}, {'emotion': 'Disgust', 'intensity': '3', 'reason': 'I remember this dude from the sample of sexual harassment. He is a racist, sexual offender, and a potential murderer.'}, {'emotion': 'Fear', 'intensity': '3', 'reason': 'feel it is related to a gun violence '}, {'emo…
874	NRA lashes out at boycott movement as United, Delta and other corporations cut ties	anonymous-source/all_shooting_images_newest/10867.jpg	[{'emotion': 'Contentment', 'intensity': '1', 'reason': 'There is no certain indication that the individual pictured is participating or going to participate in an actual act of violence; it seems like they are in a contained space meant for shooting. '}, {'emotion': 'Fear', 'intensity': '3', 'reason': "again, I don't feel comfortable seeing those big armed weapons. I understand it is just a mode…
876	How Columbine changed the way police respond to mass shootings	anonymous-source/all_shooting_images_newest/10502.jpg	[{'emotion': 'Sadness', 'intensity': '1', 'reason': 'the possibility of experiencing gun violence in a space meant for education and community.'}, {'emotion': 'Fear', 'intensity': '3', 'reason': "just imagine I'm one of those I will be freaking out."}, {'emotion': 'Fear', 'intensity': '3', 'reason': 'feel it is related to a gun violence'}, {'emotion': 'Sadness', 'intensity': '5', 'reason': 'it lo…
878	Miami Students Take Aim At Gun Violence At Do The Right Thing Event	anonymous-source/all_shooting_images_newest/90313.jpg	[{'emotion': 'Amusement', 'intensity': '2', 'reason': 'Seems like an inadequate and silly measure to take against potential gun violence in schools; if this school has already experienced such violence in the past it almost seems like the rhyme is making a mockery of the life-threatening danger that its students had to face.'}, {'emotion': 'Contentment', 'intensity': '3', 'reason': 'great proposa…
879	White man pulls gun in confrontation with black Florida A&M students	anonymous-source/all_shooting_images_newest/90451.jpg	[{'emotion': 'Fear', 'intensity': '2', 'reason': 'the mans facial expression and body language makes me feel very uneasy.'}, {'emotion': 'Fear', 'intensity': '3', 'reason': 'I feel gun violence could happen anywhere.'}, {'emotion': 'Fear', 'intensity': '3', 'reason': 'seems like an image of a conflict'}, {'emotion': 'Fear', 'intensity': '4', 'reason': "the idea of being trapped in an elevator and…
880	Parkland shooting survivor gives powerful testimony at Kavanaugh hearings	anonymous-source/all_shooting_images_newest/90424.jpg	[{'emotion': 'Awe', 'intensity': '1', 'reason': 'I felt awe as this seems like a very serious event, however, I feel indifferent as I cannot relate this to gun violence'}, {'emotion': 'Awe', 'intensity': '5', 'reason': 'I feel she is using her language to convey her ideas about gun violence.'}, {'emotion': 'Awe', 'intensity': '3', 'reason': "it's an image of an official site"}, {'emotion': 'Awe',…
883	Pittsburgh shooting: 11 dead in synagogue attack with suspect Rob Bowers to face federal hate crime charges	anonymous-source/all_shooting_images_newest/100322.jpg	[{'emotion': 'Fear', 'intensity': '2', 'reason': 'I feel fear as the police are very heavily armed and feel uneasy as there must have been a very serious shooting.'}, {'emotion': 'Fear', 'intensity': '2', 'reason': 'I do not have many feelings.'}, {'emotion': 'Fear', 'intensity': '4', 'reason': 'three armed men'}, {'emotion': 'Fear', 'intensity': '2', 'reason': 'armed officers can make the commun…
884	Boulder, Colorado, unanimously votes to ban assault weapons, high-capacity magazines	anonymous-source/all_shooting_images_newest/10496.jpg	[{'emotion': 'Amusement', 'intensity': '1', 'reason': 'I feel amused and indifferent as this is simply an image of a man in a gunstore. '}, {'emotion': 'Fear', 'intensity': '3', 'reason': 'They look professional.'}, {'emotion': 'Fear', 'intensity': '3', 'reason': 'a person is using a gun'}, {'emotion': 'Fear', 'intensity': '5', 'reason': "he looks like he knows what he's doing, I do not know how …
886	We must condemn hatred, curb gun violence to reclaim our country	anonymous-source/all_shooting_images_newest/110360.jpg	[{'emotion': 'Sadness', 'intensity': '4', 'reason': 'As a Canadian, this image reminds of the horrendous Nova Scotia shooting and makes me feel very sad. However, I also feel anger at the Trudeau government as they used the shooting as an excuse to ban most guns in Canada.'}, {'emotion': 'Awe', 'intensity': '5', 'reason': 'I feel very sad because it seems like he is honoring people who died due t…
888	Jenelle Evans' Ex Seeks Full Custody After She Pulls Gun in Front of Son During Road Rage Incident	anonymous-source/all_shooting_images_newest/393.jpg	[{'emotion': 'Amusement', 'intensity': '1', 'reason': 'this image seems like a generic photo of 2 people walking, it is hard to relate it to gun violence and feel emotions.'}, {'emotion': 'Sadness', 'intensity': '3', 'reason': 'They look serious. '}, {'emotion': 'Sadness', 'intensity': '3', 'reason': 'seems like a picture of a mother and a son'}, {'emotion': 'Contentment', 'intensity': '1', 'reas…
889	Woman who reported racist Facebook message may have stopped a school shooting, police say	anonymous-source/all_shooting_images_newest/100019.jpg	[{'emotion': 'Fear', 'intensity': '4', 'reason': "This mugshot makes me feel very uneasy as the man's facial expression is fearsome."}, {'emotion': 'Fear', 'intensity': '4', 'reason': 'This photo looks like it was taken in a police station.'}, {'emotion': 'Fear', 'intensity': '3', 'reason': 'seems like a picture of criminal'}, {'emotion': 'Disgust', 'intensity': '5', 'reason': "the mugshot trigge…
893	Special FBI team helping investigate South Carolina shooting	anonymous-source/all_shooting_images_newest/100359.jpg	[{'emotion': 'Anger', 'intensity': '3', 'reason': 'I feel very angry and dissapointed looking at the FBI logo, as I feel they could do better at preventing gun violence with all their resources.'}, {'emotion': 'Awe', 'intensity': '4', 'reason': 'They can uphold justice.'}, {'emotion': 'Fear', 'intensity': '3', 'reason': "it's about some important issue"}, {'emotion': 'Contentment', 'intensity': '…
894	Investors pressure gun industry but there are limits	anonymous-source/all_shooting_images_newest/10593.jpg	[{'emotion': 'Amusement', 'intensity': '1', 'reason': "I felt almost no emotion at this image, as it's simply a generic image if a firearms store."}, {'emotion': 'Fear', 'intensity': '3', 'reason': 'They are selling guns.'}, {'emotion': 'Fear', 'intensity': '3', 'reason': 'many guns in the image'}, {'emotion': 'Fear', 'intensity': '4', 'reason': 'there are so many guns, it looks so easy to pick o…
895	Congress wonders if this time will be different for gun control	anonymous-source/all_shooting_images_newest/10821.jpg	[{'emotion': 'Anger', 'intensity': '4', 'reason': "While I understand the people's cause, I felt angered by this poster as it is a very stupid call. Many parents with kids own guns, and they certainly love their kids more than their firearms. Parents ditching their guns does not mean shootings will happen less."}, {'emotion': 'Contentment', 'intensity': '4', 'reason': 'They appear to be unconcern…
896	Carpenter erects wooden crosses in honor of shooting rampage victims	anonymous-source/all_shooting_images_newest/110405.jpg	[{'emotion': 'Sadness', 'intensity': '3', 'reason': 'It is very sad to see the memorial of a shooting, however, I am content as people have come to honor them.'}, {'emotion': 'Sadness', 'intensity': '5', 'reason': 'I feel sad for the people who have died because of gun violence.'}, {'emotion': 'Sadness', 'intensity': '4', 'reason': 'people are mourning the victims'}, {'emotion': 'Sadness', 'inten…
899	I think I'm going to kill the president,' Utah man allegedly told police after 6 guns found in car: reports	anonymous-source/all_shooting_images_newest/90303.jpg	[{'emotion': 'Fear', 'intensity': '4', 'reason': 'this is very scary to think about and I am upset to hear that this many wanted to kill he president and had guns in his car.'}, {'emotion': 'Disgust', 'intensity': '1', 'reason': 'this guy is gross'}, {'emotion': 'Fear', 'intensity': '3', 'reason': 'Everything about gun violence makes me nervous'}, {'emotion': 'Fear', 'intensity': '3', 'reason': '…
905	D.C. man arrested on gun charge after relatives alert police to his alleged white nationalist outbursts	anonymous-source/all_shooting_images_newest/110313.jpg	[{'emotion': 'Sadness', 'intensity': '4', 'reason': 'sad that a man was arrested but it is also scary and upsetting. '}, {'emotion': 'Sadness', 'intensity': '4', 'reason': 'the pittsburg hsooting was sad'}, {'emotion': 'Fear', 'intensity': '3', 'reason': 'Everything about gun violence makes me nervous'}, {'emotion': 'Awe', 'intensity': '4', 'reason': 'not sure how to feel about this as I have mix…
909	1 year after Vegas shooting, survivors describe 'new normal'	anonymous-source/all_shooting_images_newest/90409.jpg	[{'emotion': 'Sadness', 'intensity': '4', 'reason': 'this is emotional as she survived a shooting but she is sharing her story which is very inspiring and emotional '}, {'emotion': 'Sadness', 'intensity': '2', 'reason': 'her eye freaks me out'}, {'emotion': 'Fear', 'intensity': '3', 'reason': 'Everything about gun violence makes me nervous'}, {'emotion': 'Contentment', 'intensity': '3', 'reason':…
911	Trump's school safety commission will not support age limits for gun purchases: report	anonymous-source/all_shooting_images_newest/90251.jpg	[{'emotion': 'Contentment', 'intensity': '3', 'reason': 'I am not sure what this photo is about and I forget the background behind this photo '}, {'emotion': 'Contentment', 'intensity': '1', 'reason': 'i dont know who this is'}, {'emotion': 'Fear', 'intensity': '3', 'reason': 'Everything about gun violence makes me nervous'}, {'emotion': 'Contentment', 'intensity': '3', 'reason': "I don't have an…
913	Cuomo bill would allow teachers to ask judge to take guns from students	anonymous-source/all_shooting_images_newest/10474.jpg	[{'emotion': 'Fear', 'intensity': '4', 'reason': 'scared to see all of these guns in one photo '}, {'emotion': 'Sadness', 'intensity': '3', 'reason': 'its too easy to buy guns in this country'}, {'emotion': 'Fear', 'intensity': '3', 'reason': 'Everything about gun violence makes me nervous'}, {'emotion': 'Fear', 'intensity': '4', 'reason': 'all of the guns in this photo scare me '}, {'emotion': '…
914	Polls after the Florida high school shooting show mixed views on gun reform	anonymous-source/all_shooting_images_newest/10804.jpg	[{'emotion': 'Sadness', 'intensity': '4', 'reason': 'everyone should want to stop gun violence '}, {'emotion': 'Excitement', 'intensity': '1', 'reason': 'there is hope for the future'}, {'emotion': 'Fear', 'intensity': '3', 'reason': 'Everything about gun violence makes me nervous'}, {'emotion': 'Excitement', 'intensity': '4', 'reason': 'proud and happy to see people coming together to fight for …
917	Muslim man arrested at New Mexico compound allegedly trained children to commit school shootings	anonymous-source/all_shooting_images_newest/387.jpg	[{'emotion': 'Disgust', 'intensity': '4', 'reason': 'I am disgusted and upset to hear about the fact that a man would force children into committing a shooting. '}, {'emotion': 'Sadness', 'intensity': '4', 'reason': 'poverty is sad'}, {'emotion': 'Fear', 'intensity': '3', 'reason': 'Everything about gun violence makes me nervous'}, {'emotion': 'Sadness', 'intensity': '4', 'reason': 'this photo ma…
922	Bank of America to stop lending to makers of 'military-style firearms'	anonymous-source/all_shooting_images_newest/10485.jpg	[{'emotion': 'Fear', 'intensity': '3', 'reason': 'the gun looks like those depicted in media regarding school shootings'}, {'emotion': 'Fear', 'intensity': '2', 'reason': 'guns carried by antisocial persons can be dangerous'}, {'emotion': 'Fear', 'intensity': '3', 'reason': 'the context of gun violence makes me wonder if this gun was used in a shooting.'}, {'emotion': 'Fear', 'intensity': '3', 'r…
924	Stunned by a surge in mass shootings, California lawmakers send nine gun-control bills to the governor	anonymous-source/all_shooting_images_newest/90446.jpg	[{'emotion': 'Sadness', 'intensity': '5', 'reason': 'that could have easily been any other high school, including mine, which i was at not too long ago and do have friends at now'}, {'emotion': 'Sadness', 'intensity': '4', 'reason': "seems some students died in gun violence. That's too sad"}, {'emotion': 'Sadness', 'intensity': '5', 'reason': 'this is in memoriam of the shooting that happened at …
930	New York Gov. Cuomo calls on states to outlaw NRA-branded insurance coverage	anonymous-source/all_shooting_images_newest/86.jpg	[{'emotion': 'Contentment', 'intensity': '1', 'reason': "this feels like any other political debate setting. there is hardly any way to tell what party, if any, this man may be a part of so there's no way to tell what his stance on gun control may be in my opinion."}, {'emotion': 'Awe', 'intensity': '2', 'reason': 'the officer is talking about his opinions about guns seriously'}, {'emotion': 'Con…
932	Big banks take a stand against the gun industry	anonymous-source/all_shooting_images_newest/10589.jpg	[{'emotion': 'Fear', 'intensity': '3', 'reason': 'the gun looks like those depicted in media regarding school shootings'}, {'emotion': 'Fear', 'intensity': '2', 'reason': 'guns carried by antisocial persons can be dangerous'}, {'emotion': 'Fear', 'intensity': '4', 'reason': 'the image of a gun when related to gun violence specifically is worrying.'}, {'emotion': 'Fear', 'intensity': '3', 'reason'…
933	These Students Were Told They Couldn't Come Back to School for Protesting Gun Violence	anonymous-source/all_shooting_images_newest/10186.jpg	[{'emotion': 'Sadness', 'intensity': '3', 'reason': 'the voices depicted in the image are so young, and to be a part of such an important movement against gun violence is moving'}, {'emotion': 'Excitement', 'intensity': '4', 'reason': 'i strongly support them defending for lives especially children in schools'}, {'emotion': 'Awe', 'intensity': '4', 'reason': 'I am proud of these students publicly…
934	Memorial in downtown Las Vegas honors victims of October shooting rampage	anonymous-source/all_shooting_images_newest/90459.jpg	[{'emotion': 'Awe', 'intensity': '3', 'reason': 'the artwork looks like it would have a powerful, moving story behind it'}, {'emotion': 'Sadness', 'intensity': '2', 'reason': 'not sure but are they victims of gun violence? if so thats a lot of sad'}, {'emotion': 'Contentment', 'intensity': '1', 'reason': "I'm not sure what is happening in the picture."}, {'emotion': 'Sadness', 'intensity': '3', '…
938	Gunman casually bought water moments before massacre that wounded Gabrielle Giffords, new FBI video shows	anonymous-source/all_shooting_images_newest/10357.jpg	[{'emotion': 'Contentment', 'intensity': '1', 'reason': 'I see nothing violent in the image, and nothing seems to be out of the ordinary.'}, {'emotion': 'Fear', 'intensity': '4', 'reason': 'scared to see what is happening at the cashier and if anyone was in danger '}, {'emotion': 'Contentment', 'intensity': '3', 'reason': 'I am not entirely sure what is being depicted here...'}, {'emotion': 'Fear…
939	Lie on a firearms background form? What have you got to lose?	anonymous-source/all_shooting_images_newest/90495.jpg	[{'emotion': 'Fear', 'intensity': '2', 'reason': 'I feel afraid when I see objects like these. They have potential to do a lot of harm.'}, {'emotion': 'Fear', 'intensity': '3', 'reason': 'curious to see what these papers are for and what happened '}, {'emotion': 'Fear', 'intensity': '5', 'reason': 'The image of a gun is very scary and distressing.'}, {'emotion': 'Fear', 'intensity': '5', 'reason'…
941	Reality Check: Trump administration explanation on 3D-printed guns misses the mark	anonymous-source/all_shooting_images_newest/334.jpg	[{'emotion': 'Amusement', 'intensity': '2', 'reason': 'The scene in the image is quite silly, which is amusing. However, the topic also makes me somewhat fearful.'}, {'emotion': 'Sadness', 'intensity': '4', 'reason': 'why is there any point in have 3D plastic guns sold to the public '}, {'emotion': 'Fear', 'intensity': '5', 'reason': 'The thought of 3D Printed guns is so scary!'}, {'emotion': 'An…
943	ATF emails reveal pressure to address bump stocks hours after Vegas shooting	anonymous-source/all_shooting_images_newest/100146.jpg	[{'emotion': 'Fear', 'intensity': '3', 'reason': 'These objects make me fearful. They also make me a bit disgusted that they are common in the world.'}, {'emotion': 'Fear', 'intensity': '4', 'reason': 'looks like this person is purchasing a gun and I am curious what the purchase is for and at the same time scared '}, {'emotion': 'Fear', 'intensity': '5', 'reason': 'The image of guns is so scary!'…
945	NY Dem politician urges off-duty cops to carry even during worship: Bring your firearm to church	anonymous-source/all_shooting_images_newest/100345.jpg	[{'emotion': 'Sadness', 'intensity': '2', 'reason': "The darkness of the image is both sad and somewhat scary. It seems to be depicting something sad, though it's hard to tell."}, {'emotion': 'Sadness', 'intensity': '4', 'reason': 'this photo is very upsetting to look at as it is about peoples lives who have been taken. '}, {'emotion': 'Sadness', 'intensity': '5', 'reason': 'Nobody should die bec…
949	Smith & Wesson revenue from long-gun sales fell 50 percent this year: report	anonymous-source/all_shooting_images_newest/200.jpg	[{'emotion': 'Fear', 'intensity': '4', 'reason': 'The objects in the image are very dangerous. It also makes me disgusted and angry that this scene is so common in the world. '}, {'emotion': 'Contentment', 'intensity': '3', 'reason': 'people are allowed to buy guns and own guns, but it is scary to know this. This picture also makes me wonder where this guy is from. '}, {'emotion': 'Disgust', 'int…
955	Pittsburgh synagogue gunman said he wanted all Jews to die, criminal complaint says	anonymous-source/all_shooting_images_newest/100354.jpg	[{'emotion': 'Contentment', 'intensity': '1', 'reason': "It's not super clear what event the image depicts, but it seems generally good which makes me content, and perhaps sad."}, {'emotion': 'Contentment', 'intensity': '3', 'reason': "I don't know how to feel about this photo as there is not much content given, I am curious to know what the reasoning behind this photo is and at the same time it …
956	US schools implement new safety measures in wake of recent mass shootings	anonymous-source/all_shooting_images_newest/358.jpg	[{'emotion': 'Disgust', 'intensity': '3', 'reason': 'It makes me somewhat disgusted that the object in the image is required to help us feel safe. It also makes me sad that this is what we deem necessary in the world.'}, {'emotion': 'Sadness', 'intensity': '3', 'reason': 'this photo just makes me sad '}, {'emotion': 'Sadness', 'intensity': '5', 'reason': 'It is so sad that America has had to come…
959	With Grief and Hope, Florida Students Take Gun Control Fight On the Road	anonymous-source/all_shooting_images_newest/10608.jpg	[{'emotion': 'Sadness', 'intensity': '1', 'reason': 'two loved ones are hugging each other, genuinely'}, {'emotion': 'Sadness', 'intensity': '3', 'reason': 'People might be mourning over their friends due to gun violence.'}, {'emotion': 'Sadness', 'intensity': '2', 'reason': 'I can relate to their feeling'}, {'emotion': 'Sadness', 'intensity': '2', 'reason': 'the hug is so touching'}, {'emotion':…
962	Shootings Thrust Gun Control Into Campaign Ads	anonymous-source/all_shooting_images_newest/90226.jpg	[{'emotion': 'Excitement', 'intensity': '4', 'reason': 'I want to know what happened'}, {'emotion': 'Fear', 'intensity': '5', 'reason': 'They might be having a meeting around gun violence and how to deal with guns.'}, {'emotion': 'Awe', 'intensity': '4', 'reason': 'They are protecting us'}, {'emotion': 'Fear', 'intensity': '3', 'reason': 'I think they are doing a mission but they took the guns.'}…
969	The Trump Slump : With a Friend in the White House, Gun Sales Sag	anonymous-source/all_shooting_images_newest/314.jpg	[{'emotion': 'Fear', 'intensity': '4', 'reason': 'so many guns are out in the open'}, {'emotion': 'Fear', 'intensity': '3', 'reason': 'I can’t tell the difference in gun types.'}, {'emotion': 'Fear', 'intensity': '1', 'reason': "Even the guns are dangerous, I can see that there is a professional so they won't hurt me."}, {'emotion': 'Fear', 'intensity': '3', 'reason': "there are so many guns, it'…
973	Dems introduce bill banning assault weapons	anonymous-source/all_shooting_images_newest/10268.jpg	[{'emotion': 'Anger', 'intensity': '4', 'reason': 'so many guns are out in the open - anything could happen'}, {'emotion': 'Fear', 'intensity': '3', 'reason': 'They might be having a meeting around gun violence and how to deal with guns.'}, {'emotion': 'Fear', 'intensity': '2', 'reason': 'I feel like this man is not controllable with guns.'}, {'emotion': 'Fear', 'intensity': '3', 'reason': 'there…
975	Clippers, Bucks wear T-shirts in warmups that say Enough with names of Thousand Oaks shooting victims	anonymous-source/all_shooting_images_newest/110101.jpg	[{'emotion': 'Sadness', 'intensity': '3', 'reason': 'the lighting and them bowing their heads seem like they are respecting the lives of victims'}, {'emotion': 'Sadness', 'intensity': '3', 'reason': 'People might be mourning over their friends'}, {'emotion': 'Sadness', 'intensity': '3', 'reason': 'I can relate to them'}, {'emotion': 'Sadness', 'intensity': '3', 'reason': 'You can see from the pho…
978	Democrat drives to friend s home and reportedly shoots him over political disagreement on Facebook	anonymous-source/all_shooting_images_newest/149.jpg	[{'emotion': 'Disgust', 'intensity': '3', 'reason': 'they are ugly'}, {'emotion': 'Sadness', 'intensity': '3', 'reason': 'the guy looks super weird and it is sad that the shooting had a political basis. '}, {'emotion': 'Anger', 'intensity': '2', 'reason': 'the man is arrested for shooting at people'}, {'emotion': 'Disgust', 'intensity': '5', 'reason': 'the man is a criminal with such an ugly face…
979	Right and Left React to the Gun Control Debate After the Florida Shooting	anonymous-source/all_shooting_images_newest/10598.jpg	[{'emotion': 'Contentment', 'intensity': '3', 'reason': 'no context'}, {'emotion': 'Sadness', 'intensity': '3', 'reason': 'it looks like they are longing '}, {'emotion': 'Sadness', 'intensity': '2', 'reason': 'they are influenced by shots'}, {'emotion': 'Sadness', 'intensity': '4', 'reason': 'so many people are victims of gun violance'}, {'emotion': 'Sadness', 'intensity': '3', 'reason': "People …
980	Televised meetings over school shootings are cathartic, but change nothing	anonymous-source/all_shooting_images_newest/10499.jpg	[{'emotion': 'Sadness', 'intensity': '3', 'reason': 'no Big Mac present'}, {'emotion': 'Fear', 'intensity': '3', 'reason': 'Donald Trump is incapable of being a decent human being.'}, {'emotion': 'Sadness', 'intensity': '3', 'reason': 'trump seems at a loss for the problem'}, {'emotion': 'Contentment', 'intensity': '4', 'reason': 'gun control has come to a national level'}, {'emotion': 'Sadness',…
984	Parkland student Cameron Kasky calls Trump a 'professional liar' after NRA speech	anonymous-source/all_shooting_images_newest/10684.jpg	[{'emotion': 'Amusement', 'intensity': '3', 'reason': 'marching does not really achieve anything, he should have tried using money '}, {'emotion': 'Awe', 'intensity': '2', 'reason': 'i dont know what this image is.'}, {'emotion': 'Contentment', 'intensity': '3', 'reason': 'lives should be protected and gun issue should be taken seriously'}, {'emotion': 'Excitement', 'intensity': '4', 'reason': 'p…
985	Pittsburgh holds last funeral in synagogue shooting for oldest victim	anonymous-source/all_shooting_images_newest/110057.jpg	[{'emotion': 'Disgust', 'intensity': '3', 'reason': 'BLM'}, {'emotion': 'Sadness', 'intensity': '4', 'reason': 'it appears as a shooting was based on anti-semitism '}, {'emotion': 'Sadness', 'intensity': '3', 'reason': "she is mourning for the dead and that's sad"}, {'emotion': 'Sadness', 'intensity': '5', 'reason': 'I feel so sorry for people dead of gun violence.'}, {'emotion': 'Sadness', 'inte…
989	Opinion | Guns When Trump Can t Even Tweet	anonymous-source/all_shooting_images_newest/10602.jpg	[{'emotion': 'Awe', 'intensity': '3', 'reason': 'wish I was getting hugged'}, {'emotion': 'Sadness', 'intensity': '3', 'reason': 'they are mourning'}, {'emotion': 'Excitement', 'intensity': '3', 'reason': "they are reunited after a long time and that's happy"}, {'emotion': 'Sadness', 'intensity': '3', 'reason': 'people are getting hurt bu gun violence'}, {'emotion': 'Sadness', 'intensity': '3', '…
993	Military rushed to add 4,000 to gun ban list	anonymous-source/all_shooting_images_newest/10252.jpg	[{'emotion': 'Awe', 'intensity': '3', 'reason': 'that is the cleanest .45 I have ever seen'}, {'emotion': 'Fear', 'intensity': '4', 'reason': 'the guns looks scary and intense'}, {'emotion': 'Fear', 'intensity': '2', 'reason': 'guns can hurt lives easily'}, {'emotion': 'Fear', 'intensity': '3', 'reason': 'guns should not be sold that way.'}, {'emotion': 'Fear', 'intensity': '2', 'reason': 'I hope…
995	Mass shooting victims remembered at Thousand Oaks church service and memorial	anonymous-source/all_shooting_images_newest/110089.jpg	[{'emotion': 'Contentment', 'intensity': '3', 'reason': 'blm'}, {'emotion': 'Fear', 'intensity': '3', 'reason': "it's unclear what I'm looking at "}, {'emotion': 'Awe', 'intensity': '2', 'reason': 'i think they are demonstrating for right of safety'}, {'emotion': 'Sadness', 'intensity': '3', 'reason': 'people are getting hurt from gun violence'}, {'emotion': 'Sadness', 'intensity': '1', 'reason':…
996	Trump meets with NRA officials again	anonymous-source/all_shooting_images_newest/10384.jpg	[{'emotion': 'Fear', 'intensity': '3', 'reason': 'they have power'}, {'emotion': 'Fear', 'intensity': '3', 'reason': 'Trump is in there'}, {'emotion': 'Disgust', 'intensity': '4', 'reason': 'trump is standing for NRA and thats disgusting. he is not concerned with lives at all'}, {'emotion': 'Anger', 'intensity': '3', 'reason': 'people should not be encouraged to have guns.'}, {'emotion': 'Sadness…
998	Retired firefighter convicted for firing shotgun at black teen who knocked on his door (video)	anonymous-source/all_shooting_images_newest/100339.jpg	[{'emotion': 'Fear', 'intensity': '4', 'reason': 'I am not sure who he is shooting but it looks like he is just shooting someone out in a neighborhood and that is scary knowing that anyone could have a gun and possibly do that in my neighborhood.'}, {'emotion': 'Sadness', 'intensity': '3', 'reason': 'The man appears to be shooting somebody.'}, {'emotion': 'Fear', 'intensity': '1', 'reason': "CCTV…
999	It s never going to be normal': California city in shock after gunman kills 12	anonymous-source/all_shooting_images_newest/110161.jpg	[{'emotion': 'Sadness', 'intensity': '4', 'reason': "Maybe they lost someone to gun violence and I couldn't imagine that happening to me and that makes me so sad."}, {'emotion': 'Sadness', 'intensity': '3', 'reason': 'The girl in the image is crying'}, {'emotion': 'Sadness', 'intensity': '5', 'reason': 'Sad things are happening.'}, {'emotion': 'Sadness', 'intensity': '5', 'reason': 'I can feel th…
1002	How 3-D printed guns are made and the growing security concerns they present	anonymous-source/all_shooting_images_newest/84.jpg	[{'emotion': 'Fear', 'intensity': '4', 'reason': 'I do not like seeing bullets and thinking of the harm they can do'}, {'emotion': 'Sadness', 'intensity': '3', 'reason': 'I see bullets in the image which makes me think of gun violence.'}, {'emotion': 'Fear', 'intensity': '2', 'reason': 'This toy gun can actually shoot those.'}, {'emotion': 'Fear', 'intensity': '3', 'reason': '3D gun have the same…
1003	From Barack Boom to Trump Slump: Demand Slows for AR-15-Style Guns	anonymous-source/all_shooting_images_newest/90436.jpg	[{'emotion': 'Disgust', 'intensity': '3', 'reason': "I do not like looking at guns, they scare me and shouldn't just be shopped for like clothes"}, {'emotion': 'Fear', 'intensity': '3', 'reason': 'Seeing so many long guns in one frame makes me feel fearful'}, {'emotion': 'Fear', 'intensity': '2', 'reason': 'So many guns still for sell.'}, {'emotion': 'Fear', 'intensity': '3', 'reason': 'Different…
1005	Florida video game contest shooting reignites gun rights debate	anonymous-source/all_shooting_images_newest/77.jpg	[{'emotion': 'Sadness', 'intensity': '4', 'reason': 'I feel sadness because someone may have been hurt by guns and I really hope they did not. '}, {'emotion': 'Sadness', 'intensity': '5', 'reason': 'Reminds me of the Jacksonville shooting massacre'}, {'emotion': 'Sadness', 'intensity': '2', 'reason': 'something bad must happened there.'}, {'emotion': 'Sadness', 'intensity': '3', 'reason': 'People…
1008	Retired firefighter found guilty for firing shotgun at a black teen	anonymous-source/all_shooting_images_newest/100343.jpg	[{'emotion': 'Sadness', 'intensity': '4', 'reason': 'People dying from gun violence is not okay and it makes me so sad to see that that is still happening and it was even caught on camera and still not much has been done to help.'}, {'emotion': 'Disgust', 'intensity': '3', 'reason': 'Seems like the boy in bottom left has been shot'}, {'emotion': 'Sadness', 'intensity': '4', 'reason': 'bad things …
1012	Those Banned 3D-Printed Gun Files Are Now Available on Another Site. Are They Really Free Speech?	anonymous-source/all_shooting_images_newest/87.jpg	[{'emotion': 'Sadness', 'intensity': '3', 'reason': 'I do not like seeing guns and they make me so sad to see they are still being sold.'}, {'emotion': 'Fear', 'intensity': '3', 'reason': 'this is a 3 D printed gun'}, {'emotion': 'Awe', 'intensity': '2', 'reason': 'Looks not very important to me'}, {'emotion': 'Fear', 'intensity': '1', 'reason': 'No strong feeling'}, {'emotion': 'Amusement', 'int…
1013	Calif. governor signs bill raising age limit for purchase of long guns from 18 to 21	anonymous-source/all_shooting_images_newest/90461.jpg	[{'emotion': 'Anger', 'intensity': '3', 'reason': 'I do not think people should be able to just shop for guns and have us trust that they will use them for good purposes. I think it should be much more difficult to purchase a firearm .'}, {'emotion': 'Fear', 'intensity': '3', 'reason': 'there are so many people at the gun store.'}, {'emotion': 'Fear', 'intensity': '2', 'reason': 'people is buying…
1016	Twitter Users Taunt NRA With 'Thoughts And Prayers'Amid Reports Of Financial Struggles	anonymous-source/all_shooting_images_newest/110475.jpg	[{'emotion': 'Anger', 'intensity': '3', 'reason': 'I do not support the NRA and dont think people should have guns like that so it makes me very sad. '}, {'emotion': 'Anger', 'intensity': '3', 'reason': "NRA doesn't do it's job properly"}, {'emotion': 'Awe', 'intensity': '2', 'reason': 'He is the NRA.'}, {'emotion': 'Contentment', 'intensity': '3', 'reason': "Don't know much about the NRA"}, {'em…
1017	Las Vegas pauses but looks ahead a year after mass shooting	anonymous-source/all_shooting_images_newest/100062.jpg	[{'emotion': 'Excitement', 'intensity': '3', 'reason': 'Honestly, I am not really sure but I have heard Las Vegas is a fun place. '}, {'emotion': 'Excitement', 'intensity': '4', 'reason': 'Las Vegas is fun'}, {'emotion': 'Amusement', 'intensity': '5', 'reason': 'what a good picture! This place is beautiful!'}, {'emotion': 'Excitement', 'intensity': '4', 'reason': 'Vacation style'}, {'emotion': 'E…
1018	Police: Too soon to say if shooting was racial attack	anonymous-source/all_shooting_images_newest/100196.jpg	[{'emotion': 'Fear', 'intensity': '4', 'reason': 'This man looks like someone dangerous / threatening... also appears to be a mugshot'}, {'emotion': 'Disgust', 'intensity': '4', 'reason': 'Given the brief description, I immediately assumed the image was of the perpetrator. Then I realized the caption did not specify this, and that it could have been a victim, but then I looked harder and the imag…
1019	The Latest: Vegas shooting survivors form human chain	anonymous-source/all_shooting_images_newest/100381.jpg	[{'emotion': 'Sadness', 'intensity': '5', 'reason': 'Clearly these are victims of gun violence; experiencing a lot of grief'}, {'emotion': 'Sadness', 'intensity': '3', 'reason': 'My immediate reaction was they are at a memorial for a victim of gun violence. Then I noticed the white cowboy hat and American flag tattoo. I think this definitely triggered a bias in my perception, associating the hat …
1023	'Run, hide, fight': Cal State video shows how to survive active shooter	anonymous-source/all_shooting_images_newest/10809.jpg	[{'emotion': 'Fear', 'intensity': '5', 'reason': 'This is such a realistic and scary situation'}, {'emotion': 'Awe', 'intensity': '4', 'reason': "At first, I was excited, because I watch too many movies/TV where this would actually happen that the girl is about the save the school. But I know that it's likely unrealistic. Which again makes me fear her safety, but regardless I am in awe."}, {'emot…
1029	Shooting at Pittsburgh synagogue widely condemned, deemed 'unconscionable'	anonymous-source/all_shooting_images_newest/100416.jpg	[{'emotion': 'Sadness', 'intensity': '5', 'reason': 'This appears to be a mother comforting her kids in the wake of a shooting. It leaves me absolutely terrified, and I feel so bad for the mother who is having to remain strong in the wake of such violence and terror.'}, {'emotion': 'Sadness', 'intensity': '5', 'reason': 'Seeing a woman embrace two younger daughters reminds me of my mom and my sis…
1030	Trump Vows Second Amendment Will Never Be Repealed After Former Supreme Court Justice Called For the Change	anonymous-source/all_shooting_images_newest/10635.jpg	[{'emotion': 'Disgust', 'intensity': '5', 'reason': 'To see president Trump backing the NRA after all the gun violence seen in the US is absolutely despicable'}, {'emotion': 'Anger', 'intensity': '5', 'reason': "I don't care if this image is taken out of context, which I doubt it is. This is the first image I know exactly who it is of, and political views aside, I do not approve of his logic, nor…
1031	A Republican Governor Shoots Himself in the Foot	anonymous-source/all_shooting_images_newest/90416.jpg	[{'emotion': 'Contentment', 'intensity': '3', 'reason': 'Not too sure what is going on here, but they look happy'}, {'emotion': 'Contentment', 'intensity': '4', 'reason': 'Being optimistic, I like to interpret this image as someone running for a campaign or involved in one working towards actions to prevent gun violence, and on a smaller level, I appreciate people starting the conversation and st…
1034	Larry Fink Confronted by Anti-Gun Protesters at Yahoo Summit	anonymous-source/all_shooting_images_newest/90444.jpg	[{'emotion': 'Awe', 'intensity': '5', 'reason': 'Amazing way to deliver her message; very brave'}, {'emotion': 'Awe', 'intensity': '5', 'reason': 'Seeing people make a statement (looks like risking her career or reputation) or causing a scene for a good cause makes me proud. I am in awe that people are willing to make sacrifices to make a statement for such causes and to anticipate the uncomforta…
1035	After Parkland, this survivor is fighting for gun control and against Islamophobia	anonymous-source/all_shooting_images_newest/10313.jpg	[{'emotion': 'Fear', 'intensity': '5', 'reason': 'Super realistic scenario, and I remember doing these parking lot drills in high school'}, {'emotion': 'Sadness', 'intensity': '5', 'reason': "These aren't kids at a school walk out. They are being escorted. This is terrifying and sickening that students have to face this at a place where they are supposed to be safe and learning, not interrogated.…
1037	Travis Scott honors Vegas shooting victims nearly a year later: 'No one can take this city or this country down, ever!'	anonymous-source/all_shooting_images_newest/90289.jpg	[{'emotion': 'Amusement', 'intensity': '3', 'reason': "Amusing you use a photo of Travis Scott (a rapper). I'm not sure how he relates to gun violence, but also he makes me feel fear because I know about how people in his audience were stampeded and died and that was a horrible (AstroWorld tragedy)."}, {'emotion': 'Anger', 'intensity': '2', 'reason': "My immediate thought was Astroworld and the c…
1040	John Cornyn: Raising age limit for rifles may not save lives	anonymous-source/all_shooting_images_newest/10844.jpg	[{'emotion': 'Fear', 'intensity': '1', 'reason': "The emotion of the man in the front make me feel there's something need to be worry about"}, {'emotion': 'Anger', 'intensity': '4', 'reason': "I don't like that the main people controlling the gun violence conversation are old cis white men who aren't the ones most damaged and hurt by gun violence."}, {'emotion': 'Fear', 'intensity': '3', 'reason'…
1042	8 States Are Suing the Trump Administration to Block 3D-Printed Guns	anonymous-source/all_shooting_images_newest/398.jpg	[{'emotion': 'Fear', 'intensity': '2', 'reason': 'The real gun make me afraid'}, {'emotion': 'Fear', 'intensity': '5', 'reason': 'pictures of guns makes me nervous and uncomfortable.'}, {'emotion': 'Fear', 'intensity': '3', 'reason': "He doesn't look like he can handle this"}, {'emotion': 'Fear', 'intensity': '1', 'reason': 'I have seen so many images of assault guns in the hands of ordinary citi…
1044	Texas leaders want more screening and more guns to prevent more shootings	anonymous-source/all_shooting_images_newest/10640.jpg	[{'emotion': 'Sadness', 'intensity': '3', 'reason': 'Loss of life makes me sad'}, {'emotion': 'Sadness', 'intensity': '2', 'reason': 'it took me a bit to realize that they were roses on the ground, probably mourning those lost to gun violence, and that makes me sad.'}, {'emotion': 'Sadness', 'intensity': '3', 'reason': 'many people died'}, {'emotion': 'Sadness', 'intensity': '5', 'reason': "If I …
1045	Steelers hold moment of silence for shooting victims	anonymous-source/all_shooting_images_newest/100499.jpg	[{'emotion': 'Sadness', 'intensity': '1', 'reason': 'I guess this is a photo of the scene of gun violence which make me sad'}, {'emotion': 'Sadness', 'intensity': '1', 'reason': "I assume the picture is about closing off an area with a gun violence incident but it's hard to make out so my emotional response isn't super strong."}, {'emotion': 'Fear', 'intensity': '3', 'reason': 'something bad happ…
1048	Dispute over 3D-printed guns raises many legal issues	anonymous-source/all_shooting_images_newest/131.jpg	[{'emotion': 'Fear', 'intensity': '1', 'reason': 'His face and the gun holding by him scared me'}, {'emotion': 'Fear', 'intensity': '5', 'reason': 'the guy looks intimidating and seeing guns makes me scared and nervous.'}, {'emotion': 'Fear', 'intensity': '3', 'reason': 'he looks not kind'}, {'emotion': 'Fear', 'intensity': '4', 'reason': 'that man looks like how I imagine a pro-gun advocate, so …
1050	With Gun Control Nearing a Dead End, G.O.P. Turns to School Safety	anonymous-source/all_shooting_images_newest/10850.jpg	[{'emotion': 'Sadness', 'intensity': '1', 'reason': "The photo of the young boy makes me guess there's something bad happen and makes me sad"}, {'emotion': 'Sadness', 'intensity': '1', 'reason': "I'm sad that gun violence is such a rampant issue that it needs to be talked about so much but I'm not really use what the above picture is trying to convey so I feel a mostly neutral response so this."}…
1052	3D-printed guns: Judge blocks release of blueprints for firearms	anonymous-source/all_shooting_images_newest/405.jpg	[{'emotion': 'Fear', 'intensity': '1', 'reason': 'Looks like a toy gun. But if it is a real gun it will make me scared'}, {'emotion': 'Fear', 'intensity': '5', 'reason': "I don't like seeing guns, I think it's dangerous and scary."}, {'emotion': 'Fear', 'intensity': '3', 'reason': 'do not touch it'}, {'emotion': 'Sadness', 'intensity': '3', 'reason': "again, i don't see the point of adding more g…
1054	Accused Gunman in Capital Gazette Shooting Left a Trail of Conflicts	anonymous-source/all_shooting_images_newest/10651.jpg	[{'emotion': 'Sadness', 'intensity': '1', 'reason': 'Guessing of losing of life, especially kids makes me sad'}, {'emotion': 'Sadness', 'intensity': '2', 'reason': 'I assume the flowers are for mourning the dead because of gun violence and that makes me feel bad for the ones impacted.'}, {'emotion': 'Amusement', 'intensity': '3', 'reason': 'looks peaceful'}, {'emotion': 'Sadness', 'intensity': '4…
1056	Florida Didn't Conduct Gun Background Checks for a Year Because an Employee Couldn't Log In	anonymous-source/all_shooting_images_newest/10190.jpg	[{'emotion': 'Fear', 'intensity': '1', 'reason': 'Has no idea about the relationship between Pulse and guns. But the serious atmosphere make me little bit fear'}, {'emotion': 'Sadness', 'intensity': '2', 'reason': "I think Pulse was the sight of a mass shooting and it's sad to see that a normal looking place can be the site of such a violent act."}, {'emotion': 'Contentment', 'intensity': '3', 'r…
1057	Brooklyn Official Says He Will Carry a Gun Whenever He Enters a House of Worship	anonymous-source/all_shooting_images_newest/100421.jpg	[{'emotion': 'Sadness', 'intensity': '1', 'reason': "Have no idea about what's going on in the photo. But the shade of black make it serious and sad"}, {'emotion': 'Sadness', 'intensity': '2', 'reason': 'the man in the middle looks sad, confused, and distraught and that makes me sad because I can sympathize with his expression.'}, {'emotion': 'Fear', 'intensity': '3', 'reason': 'he looks bad'}, {…
1058	Whites don't shoot whites,' suspected gunman told man after killing 2 black customers at Kentucky Kroger	anonymous-source/all_shooting_images_newest/100186.jpg	[{'emotion': 'Fear', 'intensity': '3', 'reason': 'clearly this is a person being brought in because of an incident with guns.'}, {'emotion': 'Anger', 'intensity': '3', 'reason': 'He looks bad, and he must do something wrong.'}, {'emotion': 'Fear', 'intensity': '4', 'reason': "I'm very scared and I think people are going to step up their management."}, {'emotion': 'Excitement', 'intensity': '3', '…
1059	Pittsburgh synagogue shooting prompts wide outpouring of public support	anonymous-source/all_shooting_images_newest/100315.jpg	[{'emotion': 'Sadness', 'intensity': '3', 'reason': 'these people seem to be grieving and in pain, they have lost people'}, {'emotion': 'Sadness', 'intensity': '3', 'reason': 'they look like survivors.'}, {'emotion': 'Sadness', 'intensity': '2', 'reason': "People's hearts must be very sad, I people strengthen management to reduce the occurrence of tragedies."}, {'emotion': 'Excitement', 'intensit…
1060	Texas Lt. Gov. Says Too Many Entrances Possibly To Blame In School Shooting	anonymous-source/all_shooting_images_newest/10625.jpg	[{'emotion': 'Fear', 'intensity': '3', 'reason': 'without context it looks like a man of power discussing with people something relating gun violence. probably a shooting'}, {'emotion': 'Contentment', 'intensity': '3', 'reason': 'I agree with their movement.'}, {'emotion': 'Awe', 'intensity': '2', 'reason': 'Risk reduction can be helped through more authoritative management.'}, {'emotion': 'Excit…
1062	Former Trump Official Pushes Conspiracy Theory that ISIS and Antifa Were Involved in Las Vegas Shooting	anonymous-source/all_shooting_images_newest/110156.jpg	[{'emotion': 'Anger', 'intensity': '3', 'reason': 'i dont like the size of those guns.'}, {'emotion': 'Fear', 'intensity': '3', 'reason': 'They are in a fight.'}, {'emotion': 'Contentment', 'intensity': '2', 'reason': 'Reduce tragedies in a reliable way with greater rights.'}, {'emotion': 'Excitement', 'intensity': '3', 'reason': 'Excitement'}, {'emotion': 'Fear', 'intensity': '3', 'reason': 'gun…
1063	Citigroup restricts gun sales by business customers	anonymous-source/all_shooting_images_newest/10797.jpg	[{'emotion': 'Sadness', 'intensity': '3', 'reason': 'too many guns, those could get into the wrong hands'}, {'emotion': 'Fear', 'intensity': '3', 'reason': 'They should be controlled.'}, {'emotion': 'Fear', 'intensity': '4', 'reason': 'Seeing so many guns makes me panic.'}, {'emotion': 'Excitement', 'intensity': '3', 'reason': 'Excitement'}, {'emotion': 'Contentment', 'intensity': '5', 'reason': …
1066	NRA spokeswoman calls for end to gun-free zones after Jacksonville shooting	anonymous-source/all_shooting_images_newest/363.jpg	[{'emotion': 'Fear', 'intensity': '3', 'reason': 'i always associate people at podiums with something negative in a context like gun violence'}, {'emotion': 'Contentment', 'intensity': '3', 'reason': 'I agree with her proposal.'}, {'emotion': 'Contentment', 'intensity': '2', 'reason': 'Guns can be better managed by speaking up.'}, {'emotion': 'Excitement', 'intensity': '3', 'reason': 'Excitement'…
1067	Warriors coach fundraising for gun control Brady PAC	anonymous-source/all_shooting_images_newest/90128.jpg	[{'emotion': 'Contentment', 'intensity': '3', 'reason': 'steph curry!'}, {'emotion': 'Contentment', 'intensity': '3', 'reason': "I don't read anything."}, {'emotion': 'Awe', 'intensity': '2', 'reason': "People's management of guns should be better valued."}, {'emotion': 'Excitement', 'intensity': '3', 'reason': 'Excitement'}, {'emotion': 'Contentment', 'intensity': '5', 'reason': 'they are suppor…
1068	Jury sees video of white man who greeted lost black teen with shotgun	anonymous-source/all_shooting_images_newest/100189.jpg	[{'emotion': 'Fear', 'intensity': '3', 'reason': 'clearly a mugshot from someone who killed someone with a gun'}, {'emotion': 'Anger', 'intensity': '3', 'reason': 'He is a gun shooter.'}, {'emotion': 'Fear', 'intensity': '4', 'reason': 'I was terrified because I thought he was doing something inappropriate.'}, {'emotion': 'Excitement', 'intensity': '3', 'reason': 'Excitement'}, {'emotion': 'Fear'…
1073	A Bid to Increase Gun Exports, Stalled After Sandy Hook, Moves Ahead	anonymous-source/all_shooting_images_newest/10807.jpg	[{'emotion': 'Disgust', 'intensity': '3', 'reason': 'stop!!! giving!!! young!!! people!!! guns!!!'}, {'emotion': 'Fear', 'intensity': '3', 'reason': 'He is practicing.'}, {'emotion': 'Contentment', 'intensity': '2', 'reason': 'Familiarity with firearms can help with firearm management.'}, {'emotion': 'Excitement', 'intensity': '3', 'reason': 'Excitement'}, {'emotion': 'Fear', 'intensity': '3', 'r…
1075	House Dems call for first Education Committee hearing on school shootings since Sandy Hook	anonymous-source/all_shooting_images_newest/10222.jpg	[{'emotion': 'Sadness', 'intensity': '3', 'reason': 'clearly these people are hurting'}, {'emotion': 'Anger', 'intensity': '3', 'reason': 'It is a school shooting.'}, {'emotion': 'Sadness', 'intensity': '4', 'reason': "It's a road to school and I think my heart is very scared. I am afraid of threatening the lives of students."}, {'emotion': 'Excitement', 'intensity': '3', 'reason': 'Excitement'},…
1078	Mental Health Provider That Evaluated Nikolas Cruz Before Parkland Shooting To Service Florida Charter Schools	anonymous-source/all_shooting_images_newest/90131.jpg	[{'emotion': 'Fear', 'intensity': '1', 'reason': 'a man in a orange jumpsuit in the context of gun violence hints at him being a shooter.'}, {'emotion': 'Fear', 'intensity': '2', 'reason': "he looks devious and I can't forget the deaths he inflicted"}, {'emotion': 'Fear', 'intensity': '1', 'reason': 'I do not understand what this message meant'}, {'emotion': 'Anger', 'intensity': '3', 'reason': '…
1079	Cruz confronted by mother of Santa Fe shooting victim at rally	anonymous-source/all_shooting_images_newest/90164.jpg	[{'emotion': 'Amusement', 'intensity': '1', 'reason': 'there is such a diverse crowd.'}, {'emotion': 'Amusement', 'intensity': '1', 'reason': 'I see many older people gathered and I am wondering what they are doing there'}, {'emotion': 'Anger', 'intensity': '3', 'reason': 'I do not understand what this message meant'}, {'emotion': 'Contentment', 'intensity': '3', 'reason': "don't get it"}, {'emot…
1084	Teenagers stage 'lie-in' outside White House in support of Parkland shooting victims	anonymous-source/all_shooting_images_newest/10740.jpg	[{'emotion': 'Sadness', 'intensity': '4', 'reason': "it is quite sad to see kids needing to take part in an issue that shouldn't concern them at their age."}, {'emotion': 'Sadness', 'intensity': '4', 'reason': 'This is sad because the people are laying down to signify murder victims from mass shootings. It makes me sad that we must protest being killed by gun violence'}, {'emotion': 'Fear', 'inte…
1085	Garth Brooks opens CMA Awards with moment of silence for Thousand Oaks shooting victims	anonymous-source/all_shooting_images_newest/110240.jpg	[{'emotion': 'Amusement', 'intensity': '1', 'reason': "I'm not quite sure how it relates to gun violence, but he has a cowboy hat."}, {'emotion': 'Amusement', 'intensity': '2', 'reason': 'This man looks like a celebrity and I am interested in who he is. In the context of gun violence i am curious if he is giving a concert in support of gun control'}, {'emotion': 'Sadness', 'intensity': '3', 'reas…
1087	Empire of the Sun s Luke Steele Talks Gun Control, New Album, Lindsey Buckingham & Wendy Melvoin Collaborations	anonymous-source/all_shooting_images_newest/236.jpg	[{'emotion': 'Amusement', 'intensity': '1', 'reason': "everyone's outfit looks funny, and I'm not sure why Doritos is sponsoring a guns event."}, {'emotion': 'Disgust', 'intensity': '1', 'reason': "This image makes me feel skeptical because the glamor of the event doesn't really correlate with the dark reality of gun violence"}, {'emotion': 'Anger', 'intensity': '3', 'reason': 'I do not understan…
1088	Arrest warrant issued for white man seen on video flashing gun at black college students	anonymous-source/all_shooting_images_newest/90206.jpg	[{'emotion': 'Fear', 'intensity': '1', 'reason': 'this seems to be a confrontation, and nowadays, it is not strange to see something like this escalate.'}, {'emotion': 'Fear', 'intensity': '4', 'reason': 'It seems as though the man is angry, and I am scared that he is about to shoot the man he is talking to'}, {'emotion': 'Anger', 'intensity': '3', 'reason': 'I do not understand what this message…
1089	Only 5 senators were in the room to hear Parkland shooting survivor's testimony on Kavanaugh	anonymous-source/all_shooting_images_newest/90231.jpg	[{'emotion': 'Amusement', 'intensity': '1', 'reason': 'it seems like this is a formal event, but she is dressed very casually.'}, {'emotion': 'Awe', 'intensity': '2', 'reason': 'I am assuming that this woman is speaking in favor of gun control. If so, I feel awe and admiration for her as her speech seems important. '}, {'emotion': 'Contentment', 'intensity': '3', 'reason': 'I do not understand wh…
1090	Santorum suggests student activists learn CPR instead of protesting for gun control	anonymous-source/all_shooting_images_newest/10541.jpg	[{'emotion': 'Fear', 'intensity': '1', 'reason': 'he seems to be a Republican.'}, {'emotion': 'Fear', 'intensity': '1', 'reason': 'I am completley assuming, but this man seems like he does not support gun control. If so, I feel fearful that he is so passionate about enabling mass shooters'}, {'emotion': 'Fear', 'intensity': '3', 'reason': 'I do not understand what this message meant'}, {'emotion'…
1093	BlackRock, a Shareholder in Gun Makers, Ramps Up Pressure on Gun Industry	anonymous-source/all_shooting_images_newest/10383.jpg	[{'emotion': 'Fear', 'intensity': '1', 'reason': 'this seems to be a place where people can browse guns at their leisure.'}, {'emotion': 'Fear', 'intensity': '4', 'reason': 'These machines are lethal, and seeing them handled makes me nervous because i can imagine them killing someone'}, {'emotion': 'Fear', 'intensity': '3', 'reason': 'I do not understand what this message meant'}, {'emotion': 'Fe…
1094	School kids use #IfIDieInASchoolShooting to share thoughts on gun violence	anonymous-source/all_shooting_images_newest/10757.jpg	[{'emotion': 'Sadness', 'intensity': '4', 'reason': 'there is really no reason kids of such a young age should be exposed to the notion of gun violence.'}, {'emotion': 'Sadness', 'intensity': '5', 'reason': 'little kids should not have to confront the dark realities of gun violence like this. they should not have to live in fear.'}, {'emotion': 'Sadness', 'intensity': '3', 'reason': 'I do not und…
1095	Hundreds gather to honor Noel Sparks, killed in Thousand Oaks mass shooting	anonymous-source/all_shooting_images_newest/110263.jpg	[{'emotion': 'Sadness', 'intensity': '4', 'reason': 'this seems to be a memorial in commemoration of someone who has lost their life from gun violence.'}, {'emotion': 'Sadness', 'intensity': '5', 'reason': 'I am assuming that these are victims of gun violence. It makes me sad that so many lives were lost and also that this little boy has to experience tragedy at the hands of gun violence.'}, {'em…
1096	NRA's Dana Loesch: Trump 'entertaining both sides' in gun debate	anonymous-source/all_shooting_images_newest/10652.jpg	[{'emotion': 'Amusement', 'intensity': '1', 'reason': "I'm not sure how this relates to gun violence, but the background is interesting."}, {'emotion': 'Amusement', 'intensity': '1', 'reason': "I really don't recognize this woman and her expression is not very threatening so I am not feeling much emotion."}, {'emotion': 'Disgust', 'intensity': '3', 'reason': 'I do not understand what this message…
1102	A Judge Has Blocked The Release Of 3D-Printed Gun Blueprints For Now	anonymous-source/all_shooting_images_newest/459.jpg	[{'emotion': 'Fear', 'intensity': '2', 'reason': "I'm afraid of the fact that people can make gun by 3D printer"}, {'emotion': 'Fear', 'intensity': '3', 'reason': 'Scary that you can just make these things. '}, {'emotion': 'Fear', 'intensity': '1', 'reason': 'There is still gun violence outside.'}, {'emotion': 'Sadness', 'intensity': '3', 'reason': 'guns are becoming to accessible'}, {'emotion': …
1103	These young survivors of the Parkland shooting give voice to a nation's outrage	anonymous-source/all_shooting_images_newest/10037.jpg	[{'emotion': 'Sadness', 'intensity': '1', 'reason': "the girl's emotion make me sad"}, {'emotion': 'Sadness', 'intensity': '3', 'reason': 'They look sad in this so it makes me sad'}, {'emotion': 'Fear', 'intensity': '1', 'reason': 'I have no idea what this news is about. '}, {'emotion': 'Awe', 'intensity': '5', 'reason': 'the youths are doing so much good!'}, {'emotion': 'Contentment', 'intensity…
1104	Families, friends gather as more loved ones are laid to rest in wake of school shooting	anonymous-source/all_shooting_images_newest/10825.jpg	[{'emotion': 'Sadness', 'intensity': '3', 'reason': 'The losing of life make me sad'}, {'emotion': 'Sadness', 'intensity': '3', 'reason': 'So sad to see '}, {'emotion': 'Sadness', 'intensity': '1', 'reason': 'There is still gun violence outside.'}, {'emotion': 'Sadness', 'intensity': '5', 'reason': "we've lost too many people due to gun voilence"}, {'emotion': 'Sadness', 'intensity': '5', 'reason…
1106	Florida stopped doing gun permit checks for more than a year	anonymous-source/all_shooting_images_newest/10272.jpg	[{'emotion': 'Fear', 'intensity': '1', 'reason': 'Seems like the target in a gun pavilion'}, {'emotion': 'Fear', 'intensity': '3', 'reason': 'Scary'}, {'emotion': 'Fear', 'intensity': '1', 'reason': 'this is too scary. '}, {'emotion': 'Contentment', 'intensity': '3', 'reason': "this looks like shooting being done in a safe area- this I don't mind. need controlled spaces"}, {'emotion': 'Anger', 'i…
1107	Toms Shoes Campaign to End Gun Violence Is Inspiring Hundreds of Thousands	anonymous-source/all_shooting_images_newest/110054.jpg	[{'emotion': 'Sadness', 'intensity': '1', 'reason': 'I have no idea who is the man in the photo, but the black and white photo make me sad'}, {'emotion': 'Sadness', 'intensity': '3', 'reason': 'Looks like they could potentially be remembering this man'}, {'emotion': 'Sadness', 'intensity': '1', 'reason': 'it feels like this man died from gun violence. '}, {'emotion': 'Contentment', 'intensity': '…
1112	Florida mass shootings embolden Democrats on gun control	anonymous-source/all_shooting_images_newest/477.jpg	[{'emotion': 'Fear', 'intensity': '1', 'reason': "I'm afraid of lots of real guns"}, {'emotion': 'Fear', 'intensity': '3', 'reason': 'Guns are scary'}, {'emotion': 'Fear', 'intensity': '1', 'reason': 'There is still gun violence outside.'}, {'emotion': 'Fear', 'intensity': '3', 'reason': "I don't like seeing guns"}, {'emotion': 'Fear', 'intensity': '4', 'reason': 'it seems like they are mailing o…
1114	Kansas man sentenced to life in prison for 2017 shooting that targeted Indian men	anonymous-source/all_shooting_images_newest/22.jpg	[{'emotion': 'Sadness', 'intensity': '3', 'reason': 'Facing the lose of life directly make me sad'}, {'emotion': 'Sadness', 'intensity': '3', 'reason': 'So sad to see someones life get taken'}, {'emotion': 'Sadness', 'intensity': '1', 'reason': 'There is still gun violence outside.'}, {'emotion': 'Sadness', 'intensity': '4', 'reason': "people didn't need to die"}, {'emotion': 'Sadness', 'intensit…
1115	Probe: Mercy Hospital gunman was 'disliked classmate'at fire academy, described as presenting himself in'perverted' way	anonymous-source/all_shooting_images_newest/110226.jpg	[{'emotion': 'Sadness', 'intensity': '1', 'reason': 'Seems like the shooting just happened, the fact that someone got injured make me sad'}, {'emotion': 'Sadness', 'intensity': '3', 'reason': 'Something bad probably happened so it makes me sad'}, {'emotion': 'Sadness', 'intensity': '1', 'reason': 'There is still gun violence outside.'}, {'emotion': 'Sadness', 'intensity': '4', 'reason': 'it looks…
1118	Mom may have stopped school shooting by alerting police to harassing Facebook posts	anonymous-source/all_shooting_images_newest/100388.jpg	[{'emotion': 'Fear', 'intensity': '4', 'reason': 'The man looks fearful and the background looks like in prison'}, {'emotion': 'Fear', 'intensity': '3', 'reason': 'this guy is scary looking'}, {'emotion': 'Fear', 'intensity': '4', 'reason': 'That guy looks scary.'}, {'emotion': 'Sadness', 'intensity': '3', 'reason': 'The man is going to prison.'}, {'emotion': 'Contentment', 'intensity': '3', 'rea…
1121	After Synagogue Shooting, New Jersey to Consider More Gun Restrictions	anonymous-source/all_shooting_images_newest/100053.jpg	[{'emotion': 'Fear', 'intensity': '4', 'reason': 'It looks like the man in the picture is announcing something and looks worried, given the context of gun violence, it might be just after an accident or crime.'}, {'emotion': 'Disgust', 'intensity': '3', 'reason': 'I see Jerome Powell'}, {'emotion': 'Amusement', 'intensity': '3', 'reason': 'The faces look funny.'}, {'emotion': 'Excitement', 'inten…
1122	Study: Guns send nearly 8,000 kids to ER each year in US	anonymous-source/all_shooting_images_newest/100219.jpg	[{'emotion': 'Awe', 'intensity': '4', 'reason': 'When the guns are combined with the US flag, it reminds me of the policy that US people should have the right to own guns to protect themselves.'}, {'emotion': 'Contentment', 'intensity': '3', 'reason': "it's just a picture of a bunch of guns with no context"}, {'emotion': 'Contentment', 'intensity': '1', 'reason': "This image doesn't speak to me."…
1124	Gaming community honors Jacksonville shooting victims on social media: 'Champions forever'	anonymous-source/all_shooting_images_newest/132.jpg	[{'emotion': 'Fear', 'intensity': '5', 'reason': 'The police officers are assembling somewhere, when connecting to the gun violence, it makes me to feel that this place has just had a severe gun violence incident.'}, {'emotion': 'Fear', 'intensity': '3', 'reason': 'I see a lot of cop cars and that usually means something bad'}, {'emotion': 'Fear', 'intensity': '3', 'reason': "Something bad must'v…
1128	Black man's death: Questions remain in Alabama mall shooting	anonymous-source/all_shooting_images_newest/110233.jpg	[{'emotion': 'Sadness', 'intensity': '2', 'reason': 'Just by the picture, I might assume the man is the victim and feel sadness because he is in a nice suit and the background information suggest that he is a wealthy person who is likely to be the victim of gun violence, but again, this man could also be the gunner of gun violence, I cannot give certain emotions unless I know who this guy is.'}, …
1129	Rubio says banning semiautomatic rifles is 'well outside' mainstream	anonymous-source/all_shooting_images_newest/10704.jpg	[{'emotion': 'Excitement', 'intensity': '3', 'reason': 'The debate always makes me feel tension and excitement'}, {'emotion': 'Contentment', 'intensity': '3', 'reason': "I'm not really sure what is going on here but it makes me feel indifferent"}, {'emotion': 'Contentment', 'intensity': '4', 'reason': 'I am happy that they are having a proper debate.'}, {'emotion': 'Anger', 'intensity': '3', 'rea…
1130	Kellyanne Conway cites 'anti-religiosity' in Pittsburgh shooting	anonymous-source/all_shooting_images_newest/100059.jpg	[{'emotion': 'Sadness', 'intensity': '4', 'reason': 'It seems that the lady is announcing something because of the microphone in front of her, given the context of gun violence, it might be something terrible.'}, {'emotion': 'Contentment', 'intensity': '3', 'reason': "it's just a picture of a woman I don't know without context"}, {'emotion': 'Contentment', 'intensity': '1', 'reason': 'She seems n…
1132	Hearing scheduled as gun-rights advocacy groups look to overturn Deerfield assault weapons ban	anonymous-source/all_shooting_images_newest/100248.jpg	[{'emotion': 'Fear', 'intensity': '4', 'reason': 'Many guns are shown in the picture, which makes me feel fear and high pressure'}, {'emotion': 'Contentment', 'intensity': '3', 'reason': 'it is just a picture of guns with no context'}, {'emotion': 'Fear', 'intensity': '2', 'reason': 'That is a big rack of guns.'}, {'emotion': 'Anger', 'intensity': '3', 'reason': 'I feel angry about the gun. '}, {…
1140	The President Is Pushing the Exact Conspiracies Cited by the Pittsburgh Shooter 5 Days After the Attack	anonymous-source/all_shooting_images_newest/110080.jpg	[{'emotion': 'Anger', 'intensity': '3', 'reason': 'Trump makes everything worse.'}, {'emotion': 'Awe', 'intensity': '3', 'reason': 'Sounds Neutralv'}, {'emotion': 'Amusement', 'intensity': '3', 'reason': 'I find this photo funny '}, {'emotion': 'Disgust', 'intensity': '5', 'reason': 'He is a disgusting human who has caused so much pain in our country. '}, {'emotion': 'Amusement', 'intensity': '1'…
1141	Students across America plan school walkout in support of second amendment	anonymous-source/all_shooting_images_newest/10639.jpg	[{'emotion': 'Fear', 'intensity': '3', 'reason': 'guns should be banned'}, {'emotion': 'Awe', 'intensity': '3', 'reason': 'Sounds Neutral'}, {'emotion': 'Fear', 'intensity': '4', 'reason': 'scared to see all of these guns lined up '}, {'emotion': 'Fear', 'intensity': '4', 'reason': 'seeing the thing that makes so much killing in our country makes me feel uneasy. '}, {'emotion': 'Fear', 'intensity…
1142	Floridians Tell Politicians Who Do The NRA s Bidding Their Time Is Up	anonymous-source/all_shooting_images_newest/10189.jpg	[{'emotion': 'Anger', 'intensity': '3', 'reason': "the goverment did not listen to the residents' voice"}, {'emotion': 'Awe', 'intensity': '3', 'reason': 'Sounds Neutral'}, {'emotion': 'Contentment', 'intensity': '3', 'reason': 'unsure how to feel towards this photo as I do not know what they are rallying for.'}, {'emotion': 'Awe', 'intensity': '4', 'reason': 'it is inspiring to see people go out…
1143	Pittsburgh synagogue shooting: how conspiracy theory politics emboldens anti-Semitism	anonymous-source/all_shooting_images_newest/100014.jpg	[{'emotion': 'Sadness', 'intensity': '3', 'reason': 'many innocents died from the gun violence'}, {'emotion': 'Awe', 'intensity': '3', 'reason': 'Sounds Neutral'}, {'emotion': 'Sadness', 'intensity': '4', 'reason': 'this is clearly a funeral and it makes me sad '}, {'emotion': 'Sadness', 'intensity': '4', 'reason': 'This photo makes me feel sad because it looks like a funeral, and funerals are sa…
1149	Ivanka Trump says 'our hearts are with Jacksonville' after shooting	anonymous-source/all_shooting_images_newest/155.jpg	[{'emotion': 'Sadness', 'intensity': '3', 'reason': 'a young boy died due to a gun accident.'}, {'emotion': 'Awe', 'intensity': '3', 'reason': 'Sounds Neutral'}, {'emotion': 'Sadness', 'intensity': '4', 'reason': 'sad to hear about the shooting, but happy to hear that they are being recognized '}, {'emotion': 'Anger', 'intensity': '4', 'reason': 'We do not need thoughts and prayers we need real s…
1150	Cruz criticizes Democrats in wake of deadly California shooting	anonymous-source/all_shooting_images_newest/110119.jpg	[{'emotion': 'Fear', 'intensity': '3', 'reason': 'some emergency news are coming out'}, {'emotion': 'Awe', 'intensity': '3', 'reason': 'Sounds Neutral'}, {'emotion': 'Contentment', 'intensity': '3', 'reason': 'I do not know how to feel towards this photo '}, {'emotion': 'Disgust', 'intensity': '3', 'reason': 'Ted cruz perpetuates a lot of gun culture in his politics I feel disgusted by his face. …
1151	Remington to file for bankruptcy amid declining gun sales	anonymous-source/all_shooting_images_newest/10764.jpg	[{'emotion': 'Fear', 'intensity': '3', 'reason': 'more guns are made.'}, {'emotion': 'Awe', 'intensity': '3', 'reason': 'Sounds Neutral'}, {'emotion': 'Fear', 'intensity': '3', 'reason': 'scary to see a photo of these bullets '}, {'emotion': 'Fear', 'intensity': '4', 'reason': 'It is scary to see how small the thing is that causes so much damage. '}, {'emotion': 'Fear', 'intensity': '1', 'reason'…
1153	The Las Vegas Strip Will Go Dark to Honor the Victims of Last Year's Mass Shooting	anonymous-source/all_shooting_images_newest/100021.jpg	[{'emotion': 'Sadness', 'intensity': '3', 'reason': 'they memorize the victims'}, {'emotion': 'Contentment', 'intensity': '3', 'reason': 'looks peaceful'}, {'emotion': 'Sadness', 'intensity': '4', 'reason': 'sad to see hear about the shooting and the people that have lost their lives '}, {'emotion': 'Sadness', 'intensity': '4', 'reason': 'It is sad to see the place where so much pain and destruct…
1157	Retired Firefighter Sentenced For Shooting At Black Teen Who Sought Directions	anonymous-source/all_shooting_images_newest/110504.jpg	[{'emotion': 'Sadness', 'intensity': '3', 'reason': 'the image seems to show frustration and sadness at the same time'}, {'emotion': 'Fear', 'intensity': '3', 'reason': "don't feel anything special about this image"}, {'emotion': 'Anger', 'intensity': '2', 'reason': 'I do not know what the context of the image is but the subject looks upset and in the context of gun violence may possibly be suffe…
1161	Judge blocks posting of online plans for 3D printed guns	anonymous-source/all_shooting_images_newest/271.jpg	[{'emotion': 'Fear', 'intensity': '3', 'reason': 'guns and bullets are easily accessible like they are candy'}, {'emotion': 'Contentment', 'intensity': '3', 'reason': "don't feel anything special about this image"}, {'emotion': 'Fear', 'intensity': '3', 'reason': '3d printed gun makes me angry that people have the ability to make guns at home with no oversight'}, {'emotion': 'Anger', 'intensity':…
1162	Parkland parents pushing politicians to address gun violence	anonymous-source/all_shooting_images_newest/239.jpg	[{'emotion': 'Contentment', 'intensity': '3', 'reason': 'people are taking action to bring about change'}, {'emotion': 'Anger', 'intensity': '3', 'reason': "don't feel anything special about this image"}, {'emotion': 'Sadness', 'intensity': '3', 'reason': 'they seem to be victims of a school shooting mourning, and/or protesting. Frustrated that kids so young have to push for political change to k…
1163	Texas Church Shooter Was Ticking Time Bomb	anonymous-source/all_shooting_images_newest/10267.jpg	[{'emotion': 'Sadness', 'intensity': '3', 'reason': 'deaths from gun violence is not inevitable'}, {'emotion': 'Awe', 'intensity': '3', 'reason': "don't feel anything special about this image"}, {'emotion': 'Sadness', 'intensity': '2', 'reason': 'they also seem to be mourning a great deal of people. '}, {'emotion': 'Anger', 'intensity': '5', 'reason': 'I have finished all 4 sections already!!!!!!…
1171	States Sue Trump Administration To Block Release Of 3D-Printed Gun Blueprints	anonymous-source/all_shooting_images_newest/315.jpg	[{'emotion': 'Anger', 'intensity': '3', 'reason': 'it is easily accessible to people'}, {'emotion': 'Fear', 'intensity': '3', 'reason': "don't feel anything special about this image"}, {'emotion': 'Fear', 'intensity': '3', 'reason': '3d printed gun makes me angry that people have the ability to make guns at home with no oversight'}, {'emotion': 'Anger', 'intensity': '5', 'reason': 'I have finishe…
1173	Dems say GOP focus on mental health is redirection from gun control	anonymous-source/all_shooting_images_newest/10435.jpg	[{'emotion': 'Sadness', 'intensity': '3', 'reason': 'children deserve better than this. '}, {'emotion': 'Excitement', 'intensity': '3', 'reason': "don't feel anything special about this image"}, {'emotion': 'Sadness', 'intensity': '3', 'reason': 'vigil for fallen people'}, {'emotion': 'Anger', 'intensity': '5', 'reason': 'I have finished all 4 sections already!!!!!!!!!!!!!!!!!!!!!!'}, {'emotion':…
1181	Gun-Control Activist Lucy McBath Has Officially Won Her Congressional Race	anonymous-source/all_shooting_images_newest/110384.jpg	[{'emotion': 'Amusement', 'intensity': '5', 'reason': 'skeptical'}, {'emotion': 'Contentment', 'intensity': '3', 'reason': 'who is this woman'}, {'emotion': 'Contentment', 'intensity': '1', 'reason': "I don't know who she is"}, {'emotion': 'Excitement', 'intensity': '3', 'reason': 'i dont know the headline but she looks like a person who has the power to help in reducing gun violence'}, {'emotion…
1182	Why Australia's famed gun control laws probably wouldn't reduce shooting deaths in America	anonymous-source/all_shooting_images_newest/90194.jpg	[{'emotion': 'Anger', 'intensity': '4', 'reason': 'production of bigger guns'}, {'emotion': 'Fear', 'intensity': '4', 'reason': 'those are a lot of guns'}, {'emotion': 'Anger', 'intensity': '3', 'reason': 'why do we need such big guns '}, {'emotion': 'Anger', 'intensity': '3', 'reason': 'as i hate guns and the way they are just laid out like that with no safety'}, {'emotion': 'Fear', 'intensity':…
1184	Tragedy of grand scale': Victims remembered 1 year after Vegas shooting	anonymous-source/all_shooting_images_newest/100256.jpg	[{'emotion': 'Sadness', 'intensity': '3', 'reason': 'looking at all the people passed away'}, {'emotion': 'Sadness', 'intensity': '5', 'reason': 'I am assuming that these are tomb stones of gun violence victims'}, {'emotion': 'Sadness', 'intensity': '3', 'reason': 'these people probably died to gun violence'}, {'emotion': 'Sadness', 'intensity': '3', 'reason': 'for all the lives lost due to gun v…
1185	For Parkland students, reminders of deadly shooting are 'everywhere you go'	anonymous-source/all_shooting_images_newest/10548.jpg	[{'emotion': 'Sadness', 'intensity': '4', 'reason': 'seeing people being move away due to shootings '}, {'emotion': 'Fear', 'intensity': '5', 'reason': 'I wonder what these children are going through'}, {'emotion': 'Sadness', 'intensity': '3', 'reason': 'kids have to fear for their life whenever they go to school now'}, {'emotion': 'Sadness', 'intensity': '3', 'reason': 'that school students go t…
1192	California Tries New Tack on Gun Violence: Ammunition Control	anonymous-source/all_shooting_images_newest/90338.jpg	[{'emotion': 'Fear', 'intensity': '4', 'reason': 'different types of bullets in market'}, {'emotion': 'Fear', 'intensity': '4', 'reason': 'those bullets might have killed someone '}, {'emotion': 'Fear', 'intensity': '3', 'reason': 'of the size of the bullets'}, {'emotion': 'Disgust', 'intensity': '3', 'reason': 'not sure what this image means but its showing a bullet and i feel disgusted thinking…
1193	I m David Hogg, and I Support Gun Rights	anonymous-source/all_shooting_images_newest/10356.jpg	[{'emotion': 'Anger', 'intensity': '4', 'reason': 'killing children at a very small age'}, {'emotion': 'Excitement', 'intensity': '4', 'reason': 'It looks like an anti-gun protest'}, {'emotion': 'Sadness', 'intensity': '3', 'reason': 'politicians will probably see these signs and not care at all'}, {'emotion': 'Sadness', 'intensity': '3', 'reason': 'the people are protesting for the right reason …
1194	Trump orders flags lowered to half-staff in solemn respect for synagogue shooting victims	anonymous-source/all_shooting_images_newest/100270.jpg	[{'emotion': 'Sadness', 'intensity': '3', 'reason': 'showing her pain infront of the whitehous'}, {'emotion': 'Fear', 'intensity': '4', 'reason': 'I wonder what the background of this photo is. It looks ominous and dangerous.'}, {'emotion': 'Sadness', 'intensity': '3', 'reason': 'this is probably a memorial'}, {'emotion': 'Sadness', 'intensity': '3', 'reason': 'for all the lives lost '}, {'emotio…
1201	Gun-rights hysteria doesn't sell in the Trump era	anonymous-source/all_shooting_images_newest/10425.jpg	[{'emotion': 'Fear', 'intensity': '4', 'reason': 'guns scare me'}, {'emotion': 'Fear', 'intensity': '3', 'reason': 'there are many weapons.'}, {'emotion': 'Fear', 'intensity': '3', 'reason': 'The bullets seem very cold and horrifying '}, {'emotion': 'Awe', 'intensity': '3', 'reason': 'ammos make me refrain myself'}, {'emotion': 'Disgust', 'intensity': '3', 'reason': 'why are such large bullets ne…
1203	Garden provides place to mourn Las Vegas shooting victims	anonymous-source/all_shooting_images_newest/90343.jpg	[{'emotion': 'Sadness', 'intensity': '4', 'reason': 'gun violence is something that should not exist'}, {'emotion': 'Sadness', 'intensity': '3', 'reason': 'it mourned for the innocent victims.'}, {'emotion': 'Sadness', 'intensity': '4', 'reason': 'seeing victims pictures hanging makes me feel really sad and sorry '}, {'emotion': 'Sadness', 'intensity': '3', 'reason': 'sad for the lost souls'}, {'…
1206	This Is Our Lane': Doctors Slam NRA After Chicago Hospital Shooting	anonymous-source/all_shooting_images_newest/110269.jpg	[{'emotion': 'Sadness', 'intensity': '2', 'reason': 'The nurse/doctor seems exhausted'}, {'emotion': 'Awe', 'intensity': '3', 'reason': "doctors are saving people's lives whereas NRA is threatening people's lives"}, {'emotion': 'Sadness', 'intensity': '3', 'reason': "this person's face looks very sad "}, {'emotion': 'Sadness', 'intensity': '3', 'reason': 'this doctor looks sad'}, {'emotion': 'Sad…
1207	US 'crypto-anarchist' sees 3D-printed guns as fundamental right	anonymous-source/all_shooting_images_newest/482.jpg	[{'emotion': 'Fear', 'intensity': '4', 'reason': 'Access to guns is too easy'}, {'emotion': 'Fear', 'intensity': '3', 'reason': 'more weapons will be made.'}, {'emotion': 'Fear', 'intensity': '3', 'reason': 'the gun seems horrifying '}, {'emotion': 'Excitement', 'intensity': '3', 'reason': 'we can print our own weapons now'}, {'emotion': 'Anger', 'intensity': '5', 'reason': 'assuming this is the …
1211	NRA to spend $1 million on pro-Kavanaugh ads: SCOTUS pick will protect right to keep and bear arms	anonymous-source/all_shooting_images_newest/474.jpg	[{'emotion': 'Fear', 'intensity': '4', 'reason': 'Guns are scary!!!'}, {'emotion': 'Fear', 'intensity': '3', 'reason': 'more guns are made.'}, {'emotion': 'Fear', 'intensity': '3', 'reason': 'these guns could lead to the death of many people if they are misusing'}, {'emotion': 'Excitement', 'intensity': '4', 'reason': 'these guns look fresh'}, {'emotion': 'Anger', 'intensity': '3', 'reason': 'so …
1217	Jeffrey Zeigler in court on Tuesday, when he was sentenced to at least four years in prison. Credit Credit Todd McInturf/Detroit News, via Associated Press By Sarah Mervosh Nov. 13, 2018 A white man who fired a shotgun	anonymous-source/all_shooting_images_newest/110103.jpg	[{'emotion': 'Sadness', 'intensity': '1', 'reason': 'mourning a loss that was preventable is heavy work to do'}, {'emotion': 'Sadness', 'intensity': '1', 'reason': 'mourning a loss that was preventable is heavy work to do'}, {'emotion': 'Sadness', 'intensity': '3', 'reason': 'To me it looks like a father who had just lost his child to gun violence. The worst part is the realization that he probab…
1218	Commentary: This is how common school shootings are in America	anonymous-source/all_shooting_images_newest/110476.jpg	[{'emotion': 'Sadness', 'intensity': '3', 'reason': 'the amount of calls that go through in these times are so stressful and anxious'}, {'emotion': 'Sadness', 'intensity': '3', 'reason': 'the amount of calls that go through in these times are so stressful and anxious'}, {'emotion': 'Fear', 'intensity': '3', 'reason': 'Everyone in the image looks so terrified but not for themselves but for the peo…
1220	Trump to visit Pittsburgh in response to synagogue shooting	anonymous-source/all_shooting_images_newest/100122.jpg	[{'emotion': 'Disgust', 'intensity': '2', 'reason': 'man does absolutely nothing but perpetuate white supremacy '}, {'emotion': 'Disgust', 'intensity': '2', 'reason': 'man does absolutely nothing but perpetuate white supremacy '}, {'emotion': 'Disgust', 'intensity': '3', 'reason': 'To me Trump has no care in the world for the civilians of the United States and its disgusting to see him hold such …
1223	Corporate partners cut cord with NRA as gun control debate rages	anonymous-source/all_shooting_images_newest/10039.jpg	[{'emotion': 'Sadness', 'intensity': '3', 'reason': 'all of this is just so preventable '}, {'emotion': 'Sadness', 'intensity': '3', 'reason': 'all of this is just so preventable '}, {'emotion': 'Sadness', 'intensity': '3', 'reason': 'This looks like a school yard fence, meaning those probably symbolizes the lives lost and its saddening to see friends and family have to honor their children or cl…
1224	WATCH LIVE: Senator Bill Nelson speaks after mass shooting at Jacksonville Landing	anonymous-source/all_shooting_images_newest/475.jpg	[{'emotion': 'Fear', 'intensity': '3', 'reason': 'active police/crime scenes give me anxiety '}, {'emotion': 'Fear', 'intensity': '3', 'reason': 'active police/crime scenes give me anxiety '}, {'emotion': 'Fear', 'intensity': '3', 'reason': 'Based on the red tape and cop cars its clear that some form of gun violence took place and ultimately led to someones death. Its scary to see how it can happ…
1227	White Man Accused Of Pulling Gun On Muslim Teens At Minnesota McDonald s	anonymous-source/all_shooting_images_newest/110114.jpg	[{'emotion': 'Fear', 'intensity': '3', 'reason': "you never know who's armed and if you could get into a bad position or not"}, {'emotion': 'Fear', 'intensity': '3', 'reason': "you never know who's armed and if you could get into a bad position or not"}, {'emotion': 'Fear', 'intensity': '3', 'reason': 'Not really sure how this relates to gun violence'}, {'emotion': 'Fear', 'intensity': '3', 'reas…
1228	Who is Jemel Roberson? Black Security Guard Shot Dead By Police After Subduing and Disarming Gunman	anonymous-source/all_shooting_images_newest/110516.jpg	[{'emotion': 'Sadness', 'intensity': '2', 'reason': 'black men are especially prone to getting framed as perpetrators of violence '}, {'emotion': 'Sadness', 'intensity': '2', 'reason': 'black men are especially prone to getting framed as perpetrators of violence '}, {'emotion': 'Fear', 'intensity': '3', 'reason': "I'm not really sure how to view this in the context of gun violence but i am assumi…
1229	Trump meets with families affected by Texas shooting, mother calls him 'toddler'	anonymous-source/all_shooting_images_newest/10777.jpg	[{'emotion': 'Disgust', 'intensity': '3', 'reason': 'Trump is a vile man and I wish he was never president (although I don\'t think that any presidents have been "good")'}, {'emotion': 'Disgust', 'intensity': '3', 'reason': 'Trump is a vile man and I wish he was never president (although I don\'t think that any presidents have been "good")'}, {'emotion': 'Disgust', 'intensity': '3', 'reason': "Tr…
1231	Amazon bans the sale of a guidebook for 3D printing a gun	anonymous-source/all_shooting_images_newest/182.jpg	[{'emotion': 'Fear', 'intensity': '2', 'reason': 'more accessible guns means more fear '}, {'emotion': 'Fear', 'intensity': '2', 'reason': 'more accessible guns means more fear '}, {'emotion': 'Fear', 'intensity': '3', 'reason': "In todays climate its scary to see toy guns still being made. While I understand why children might enjoy using them because they don't know the history, for people that…
1232	November 7 1:04 PM Washington voters approve tough gun control measures	anonymous-source/all_shooting_images_newest/110276.jpg	[{'emotion': 'Fear', 'intensity': '3', 'reason': 'these guns are absolutely massive unnecessarily dangerous'}, {'emotion': 'Fear', 'intensity': '3', 'reason': 'these guns are absolutely massive unnecessarily dangerous'}, {'emotion': 'Fear', 'intensity': '3', 'reason': "I think those who advocate for second amendment rights and gun production companies have glorified the weapon to a point where pe…
1233	After Santa Fe School Shooting, Texas Town Grapples With Bullying	anonymous-source/all_shooting_images_newest/10053.jpg	[{'emotion': 'Sadness', 'intensity': '3', 'reason': 'why do we have to keep on living like this?'}, {'emotion': 'Sadness', 'intensity': '3', 'reason': 'why do we have to keep on living like this?'}, {'emotion': 'Sadness', 'intensity': '3', 'reason': 'Seeing something like this occur on a school yard is so saddening to see because most of us have always associated school yards as a place for reces…
1234	Maryland shooting sparks reactions from politicians: 'Our prayers are with all those impacted'	anonymous-source/all_shooting_images_newest/90061.jpg	[{'emotion': 'Fear', 'intensity': '3', 'reason': 'anytime a scene looks like this something bad has happened'}, {'emotion': 'Fear', 'intensity': '3', 'reason': 'anytime a scene looks like this something bad has happened'}, {'emotion': 'Sadness', 'intensity': '3', 'reason': "Although we can see if this is outside a school, the stop sign for me symbolizes a school environment. It's crazy to see how…
1237	Accused Fredericton shooter will undergo psych assessment	anonymous-source/all_shooting_images_newest/110370.jpg	[{'emotion': 'Sadness', 'intensity': '2', 'reason': 'This person has done something bad'}, {'emotion': 'Sadness', 'intensity': '2', 'reason': 'the innate looks kinda ashamed and regretful of his situations'}, {'emotion': 'Sadness', 'intensity': '3', 'reason': 'This people hurt someone and get pubished.'}, {'emotion': 'Fear', 'intensity': '2', 'reason': 'I felt fear because seeing someone in handc…
1241	Undetectable' plastic 3-D printed guns have been detected by TSA airport screeners	anonymous-source/all_shooting_images_newest/222.jpg	[{'emotion': 'Anger', 'intensity': '3', 'reason': 'This kind of gun may be hard to find '}, {'emotion': 'Awe', 'intensity': '3', 'reason': 'this looks like some high tech equipment that one should better be cautious when operating it'}, {'emotion': 'Fear', 'intensity': '3', 'reason': 'Someone may die or get hurt.'}, {'emotion': 'Fear', 'intensity': '3', 'reason': 'I feel fear because this looks l…
1243	The Latest: Shooting survivors focus anger at Trump, tweets	anonymous-source/all_shooting_images_newest/10116.jpg	[{'emotion': 'Sadness', 'intensity': '4', 'reason': 'Some people have dead there.'}, {'emotion': 'Sadness', 'intensity': '4', 'reason': 'this is some memorial scene'}, {'emotion': 'Sadness', 'intensity': '3', 'reason': 'Sad for the people dead.'}, {'emotion': 'Sadness', 'intensity': '4', 'reason': 'This image makes me sad because it looks like tragedy has occurred.'}, {'emotion': 'Sadness', 'inte…
1246	Jamie Lee Curtis Made Sure Halloween Only Used Firearms for Self-Defense and Aligned With Her Views on Gun Control	anonymous-source/all_shooting_images_newest/100263.jpg	[{'emotion': 'Contentment', 'intensity': '2', 'reason': 'She smiled '}, {'emotion': 'Contentment', 'intensity': '3', 'reason': "she looks like she's an executive of some fortune 500 companies"}, {'emotion': 'Contentment', 'intensity': '3', 'reason': 'This would help more people know about gun controll.'}, {'emotion': 'Contentment', 'intensity': '4', 'reason': 'I feel content because it is Jamie L…
1253	Texas Governor Scraps Campaign Contest to Give Away Shotgun	anonymous-source/all_shooting_images_newest/10123.jpg	[{'emotion': 'Sadness', 'intensity': '3', 'reason': 'Some people has dead'}, {'emotion': 'Awe', 'intensity': '4', 'reason': 'the old man is handicapped and in his wheelchair all suited up and holding a blossom of tulips, very likely on his way to a funeral'}, {'emotion': 'Sadness', 'intensity': '3', 'reason': 'Sad for those people get hurt in gun violence.'}, {'emotion': 'Sadness', 'intensity': '…
1258	Is the NRA going bankrupt? Group Claims it Will Soon be Unable to Exist Due to Financial Difficulties	anonymous-source/all_shooting_images_newest/232.jpg	[{'emotion': 'Contentment', 'intensity': '3', 'reason': 'dont have context to this '}, {'emotion': 'Fear', 'intensity': '2', 'reason': 'The display of so many guns made me feel anxious and unsafe'}, {'emotion': 'Fear', 'intensity': '2', 'reason': 'The guns are dangerous'}, {'emotion': 'Fear', 'intensity': '2', 'reason': 'Slightly scared because of the hand on trigger, but no humans pictured makes…
1262	Seattle gun storage law 'eminently reasonable,' judge says in tossing NRA, gun group's lawsuit	anonymous-source/all_shooting_images_newest/100240.jpg	[{'emotion': 'Fear', 'intensity': '3', 'reason': 'makes me think of wars'}, {'emotion': 'Fear', 'intensity': '3', 'reason': 'Although portrays of guns are not uncommon in the media, the picture of guns can still trigger anxiety and fears'}, {'emotion': 'Excitement', 'intensity': '2', 'reason': 'It would be nice to practice guns'}, {'emotion': 'Fear', 'intensity': '2', 'reason': "Slight fear and d…
1265	To Defend Against School Shootings, Massachusetts District Is Passing Out Emergency Buckets With Hammer, Rope	anonymous-source/all_shooting_images_newest/367.jpg	[{'emotion': 'Sadness', 'intensity': '3', 'reason': 'school shootings make me feel realy sad '}, {'emotion': 'Fear', 'intensity': '5', 'reason': 'Feeling of intense fear not only because of the man holding a gun but also the setting of the image - school, and also the light and shadow is creating that negative and unstable feeling.'}, {'emotion': 'Fear', 'intensity': '5', 'reason': 'He is practic…
1270	Montana Gov. Steve Bullock says he 'would' support assault weapons ban	anonymous-source/all_shooting_images_newest/356.jpg	[{'emotion': 'Contentment', 'intensity': '3', 'reason': 'dont have context '}, {'emotion': 'Amusement', 'intensity': '1', 'reason': 'he looks positive and happy'}, {'emotion': 'Amusement', 'intensity': '3', 'reason': 'He seems happy and I can feel it'}, {'emotion': 'Contentment', 'intensity': '3', 'reason': "don't recognize him"}, {'emotion': 'Contentment', 'intensity': '3', 'reason': "i'm not aw…
1274	Gunman targeting Jews kills 11 in Pittsburgh synagogue	anonymous-source/all_shooting_images_newest/100379.jpg	[{'emotion': 'Sadness', 'intensity': '3', 'reason': 'people shouldnt have to deal with any kind of violence'}, {'emotion': 'Awe', 'intensity': '3', 'reason': 'Warm colors and low contrast make the image look soft and tranquil'}, {'emotion': 'Sadness', 'intensity': '5', 'reason': "I'm sorry for their loss"}, {'emotion': 'Sadness', 'intensity': '2', 'reason': 'A serious image and her facial express…
1275	How to design a school in the era of mass shootings	anonymous-source/all_shooting_images_newest/382.jpg	[{'emotion': 'Sadness', 'intensity': '3', 'reason': "children don't deserve to see or be part of such happenings"}, {'emotion': 'Fear', 'intensity': '4', 'reason': 'The image is blurry so it creates a sense of unsafe and intension.'}, {'emotion': 'Fear', 'intensity': '2', 'reason': "I'm afraid that those children would get hurt"}, {'emotion': 'Fear', 'intensity': '1', 'reason': 'scared for the li…
1276	'Alarming' rise in eye injuries from BB, pellet and paintball guns in kids	anonymous-source/all_shooting_images_newest/10781.jpg	[{'emotion': 'Contentment', 'intensity': '3', 'reason': 'dont have context '}, {'emotion': 'Contentment', 'intensity': '1', 'reason': "I won't relate this image to gun violence without the instructions. "}, {'emotion': 'Contentment', 'intensity': '2', 'reason': 'He is testing his sight, which is beneficial for his health'}, {'emotion': 'Contentment', 'intensity': '3', 'reason': "don't associate t…
1283	A Community Response to Mass Shooting Forum and Discussion	anonymous-source/all_shooting_images_newest/10663.jpg	[{'emotion': 'Sadness', 'intensity': '3', 'reason': 'children have to campaign for change'}, {'emotion': 'Sadness', 'intensity': '3', 'reason': 'RIP.'}, {'emotion': 'Sadness', 'intensity': '3', 'reason': 'I feel sad because I hate seeing people mourn'}, {'emotion': 'Contentment', 'intensity': '3', 'reason': 'It looks like parade against gun violence.'}, {'emotion': 'Sadness', 'intensity': '2', 'r…
1284	Dems vow swift action on gun reform next year | TheHill	anonymous-source/all_shooting_images_newest/110052.jpg	[{'emotion': 'Sadness', 'intensity': '3', 'reason': 'law enforcement is inflicting gun violence too'}, {'emotion': 'Fear', 'intensity': '4', 'reason': 'When can we say we are safe?'}, {'emotion': 'Contentment', 'intensity': '3', 'reason': 'this is just a picture of a cop with no context'}, {'emotion': 'Awe', 'intensity': '3', 'reason': 'It looks like the police is enforcing the law.'}, {'emotion'…
1285	Capital Gazette gunman constantly harassed journalists on Twitter. Why wasn't he stopped?	anonymous-source/all_shooting_images_newest/10242.jpg	[{'emotion': 'Sadness', 'intensity': '3', 'reason': 'of the frequency of gun violence'}, {'emotion': 'Sadness', 'intensity': '3', 'reason': '5 people died.'}, {'emotion': 'Sadness', 'intensity': '4', 'reason': 'I feel sad when people die'}, {'emotion': 'Sadness', 'intensity': '4', 'reason': "It's really sad to see some people died of gun violence."}, {'emotion': 'Sadness', 'intensity': '2', 'reas…
1286	It s Time to Hand the Mic to Gun Owners	anonymous-source/all_shooting_images_newest/100501.jpg	[{'emotion': 'Amusement', 'intensity': '3', 'reason': 'I do not recognise the individual'}, {'emotion': 'Awe', 'intensity': '3', 'reason': "Not sure what's she doing."}, {'emotion': 'Contentment', 'intensity': '3', 'reason': 'This is just a picture of a woman with no context'}, {'emotion': 'Awe', 'intensity': '3', 'reason': 'She may be a gun violence victim.'}, {'emotion': 'Sadness', 'intensity':…
1290	55th District candidates address guns, political affiliations during Park Ridge forum	anonymous-source/all_shooting_images_newest/100329.jpg	[{'emotion': 'Amusement', 'intensity': '2', 'reason': 'I do not understand the context of the image'}, {'emotion': 'Sadness', 'intensity': '3', 'reason': 'Not sure what they are doing.'}, {'emotion': 'Contentment', 'intensity': '3', 'reason': 'This is just a picture of two people with no context'}, {'emotion': 'Contentment', 'intensity': '3', 'reason': 'We need to do more actions to be against gu…
1293	Trump's silence on Waffle House shooting speaks volumes	anonymous-source/all_shooting_images_newest/10706.jpg	[{'emotion': 'Sadness', 'intensity': '3', 'reason': 'innocent lives are taken by gun violence'}, {'emotion': 'Sadness', 'intensity': '4', 'reason': 'Sorry for their loss.'}, {'emotion': 'Sadness', 'intensity': '4', 'reason': 'I feel sad when I see people mourning'}, {'emotion': 'Sadness', 'intensity': '3', 'reason': 'Sorry about the gun violence victim.'}, {'emotion': 'Sadness', 'intensity': '3',…
1296	Democrats Plan to Pursue Aggressive Gun-Control Legislation	anonymous-source/all_shooting_images_newest/110031.jpg	[{'emotion': 'Awe', 'intensity': '3', 'reason': 'it seems like a intense momemt'}, {'emotion': 'Contentment', 'intensity': '3', 'reason': 'They got what they want.'}, {'emotion': 'Contentment', 'intensity': '3', 'reason': 'this is just a picture of people with no context'}, {'emotion': 'Contentment', 'intensity': '3', 'reason': 'It looks like them are agreeing on something.'}, {'emotion': 'Sadnes…
