# Supplementary material
Source: ML conference proceedings conference paper supplement (https://aclanthology.org/2022.aacl-main.29)
Supplement: Dataset [file 2022.aacl-main.29.Dataset.zip › NEmoP/NEmoP-Consensus/NEmoP-CR/NEmoP-CR-T.csv]

	Headline	url	text_responses
1	Emma Gonzalez Brought to Tears Honoring Victims of Gun Violence	anonymous-source/all_shooting_images_newest/100502.jpg	[{'emotion': 'Sadness', 'intensity': '3', 'reason': 'gun violence is such a serious issue '}, {'emotion': 'Sadness', 'intensity': '3', 'reason': 'it is sad to know the lost of someone'}, {'emotion': 'Sadness', 'intensity': '4', 'reason': 'sad story '}, {'emotion': 'Sadness', 'intensity': '3', 'reason': "the trauma that victims' families have to undergo is unimaginable. "}, {'emotion': 'Contentmen…
7	Pittsburgh synagogue shooting: Portraits of the 11 victims	anonymous-source/all_shooting_images_newest/100385.jpg	[{'emotion': 'Disgust', 'intensity': '4', 'reason': 'people were killed based on their religion '}, {'emotion': 'Awe', 'intensity': '5', 'reason': 'It is always good to remember these victims. Only by remembering them, we can feel the pain and call for changes.'}, {'emotion': 'Contentment', 'intensity': '2', 'reason': 'no specific feeling'}, {'emotion': 'Sadness', 'intensity': '3', 'reason': 'the…
19	Sanders addresses Trump's wavering position on guns Video	anonymous-source/all_shooting_images_newest/10818.jpg	[{'emotion': 'Contentment', 'intensity': '3', 'reason': 'it needs to be addressed '}, {'emotion': 'Contentment', 'intensity': '2', 'reason': "It's good to have a stable position"}, {'emotion': 'Contentment', 'intensity': '2', 'reason': 'good to see people showing attitude to things that matter'}, {'emotion': 'Fear', 'intensity': '3', 'reason': 'attitude of the leader of the country on gun control…
21	Doctors pay tribute to Chicago shooting victim Tamara O'Neal, MD:'We are so sorry we couldn't protect you'	anonymous-source/all_shooting_images_newest/110264.jpg	[{'emotion': 'Sadness', 'intensity': '3', 'reason': 'Sad for victims.'}, {'emotion': 'Fear', 'intensity': '3', 'reason': 'failure to protect '}, {'emotion': 'Sadness', 'intensity': '2', 'reason': 'This is so sad'}, {'emotion': 'Awe', 'intensity': '4', 'reason': 'He said we could not protect you'}, {'emotion': 'Sadness', 'intensity': '4', 'reason': 'Doctors do as much as they can to save lives and…
23	Bloomberg criticizes Trump after Pittsburgh shooting	anonymous-source/all_shooting_images_newest/100079.jpg	[{'emotion': 'Contentment', 'intensity': '3', 'reason': 'People should pay more attention to the shooting.'}, {'emotion': 'Fear', 'intensity': '3', 'reason': 'shooting '}, {'emotion': 'Amusement', 'intensity': '3', 'reason': 'I think he is attacking the wrong person. Trump would freak out'}, {'emotion': 'Excitement', 'intensity': '3', 'reason': 'I do not like trump'}, {'emotion': 'Contentment', '…
34	Gun-related homicides, suicides kill more people than war, study says	anonymous-source/all_shooting_images_newest/126.jpg	[{'emotion': 'Sadness', 'intensity': '3', 'reason': 'Gun-related homicides, suicides kill more people than war. It is pathetic.'}, {'emotion': 'Sadness', 'intensity': '3', 'reason': 'deaths related to gun violence '}, {'emotion': 'Awe', 'intensity': '3', 'reason': 'That is a very shocking stat'}, {'emotion': 'Sadness', 'intensity': '3', 'reason': 'I do not like it '}, {'emotion': 'Sadness', 'inte…
35	Spokane, Wash. ends gun sales by police after probe	anonymous-source/all_shooting_images_newest/110042.jpg	[{'emotion': 'Contentment', 'intensity': '3', 'reason': "Ending gun sales may save somebody's life."}, {'emotion': 'Contentment', 'intensity': '3', 'reason': 'ends gun sales'}, {'emotion': 'Awe', 'intensity': '3', 'reason': 'What is a probe?'}, {'emotion': 'Fear', 'intensity': '3', 'reason': 'I do not like it '}, {'emotion': 'Contentment', 'intensity': '4', 'reason': 'good on Washington for knowi…
43	Trump Made False Claims About 9/11 to Justify Hosting a Rally After the Synagogue Shooting	anonymous-source/all_shooting_images_newest/100082.jpg	[{'emotion': 'Disgust', 'intensity': '4', 'reason': 'trump is a disgusting human to justify his actions'}, {'emotion': 'Disgust', 'intensity': '4', 'reason': 'it is never okay to make false claims to serve your own agenda'}, {'emotion': 'Amusement', 'intensity': '3', 'reason': 'I think its funny that president of United States would do something like that'}, {'emotion': 'Sadness', 'intensity': '3…
44	Judge blocks distribution of 3D-printed gun blueprints until case is resolved	anonymous-source/all_shooting_images_newest/128.jpg	[{'emotion': 'Contentment', 'intensity': '2', 'reason': 'for now i am content but intriguied to see the next steps'}, {'emotion': 'Contentment', 'intensity': '3', 'reason': 'the distribution of 3D-printed gun blueprints should not happen.'}, {'emotion': 'Contentment', 'intensity': '3', 'reason': 'I think the judge did a right thing'}, {'emotion': 'Contentment', 'intensity': '4', 'reason': 'that i…
48	Bank of America to Stop Financing Makers of Military-Style Guns	anonymous-source/all_shooting_images_newest/10755.jpg	[{'emotion': 'Contentment', 'intensity': '2', 'reason': 'that is their decision to make'}, {'emotion': 'Contentment', 'intensity': '4', 'reason': 'I support the defunding of Military-Style Guns'}, {'emotion': 'Contentment', 'intensity': '3', 'reason': 'I feel like they are doing the right thing'}, {'emotion': 'Contentment', 'intensity': '3', 'reason': 'it confuses me when big corporations get pol…
51	After He Subdued a Shooting Suspect, an Armed, Black Security Guard Is Killed by Responding Police	anonymous-source/all_shooting_images_newest/110361.jpg	[{'emotion': 'Anger', 'intensity': '3', 'reason': 'yet again the police kill an innocent person'}, {'emotion': 'Disgust', 'intensity': '4', 'reason': 'absolutely appalled at how this could happen.'}, {'emotion': 'Anger', 'intensity': '3', 'reason': 'I think the police I controlled by the stereotype. Also I think its a racist issue'}, {'emotion': 'Anger', 'intensity': '4', 'reason': 'that should n…
60	Vernon Hills teen accused of wearing white supremacist shirt pleads not guilty to weapons charges	anonymous-source/all_shooting_images_newest/10107.jpg	[{'emotion': 'Excitement', 'intensity': '1', 'reason': 'not sure what happened '}, {'emotion': 'Fear', 'intensity': '3', 'reason': 'personal attack makes me angry and fear.'}, {'emotion': 'Sadness', 'intensity': '3', 'reason': 'Teenagers have access to gun, which may lead them to do something extreme as they are not mentally mature.'}, {'emotion': 'Amusement', 'intensity': '3', 'reason': 'I do no…
61	He Created 3D-Printed Guns And Funded Neo-Nazis. Now He's An International Fugitive.	anonymous-source/all_shooting_images_newest/90054.jpg	[{'emotion': 'Excitement', 'intensity': '3', 'reason': 'people like him should be arrested '}, {'emotion': 'Excitement', 'intensity': '4', 'reason': 'it met my expectation'}, {'emotion': 'Contentment', 'intensity': '3', 'reason': "there's always somebody with gun that can be a threat to the society. but thankfully he's an international fugitive now"}, {'emotion': 'Fear', 'intensity': '3', 'reason…
63	Trump's school safety commission would prefer if you didn't talk about gun control	anonymous-source/all_shooting_images_newest/278.jpg	[{'emotion': 'Excitement', 'intensity': '1', 'reason': 'not sure what happened '}, {'emotion': 'Anger', 'intensity': '4', 'reason': "don't talk about it doesn't means it's not an issue."}, {'emotion': 'Anger', 'intensity': '3', 'reason': 'this cannot solve the problem from the source'}, {'emotion': 'Fear', 'intensity': '3', 'reason': 'I do not like it '}, {'emotion': 'Anger', 'intensity': '5', 'r…
66	March for Our Rights rally draws thousands of pro-gun supporters in Washington state	anonymous-source/all_shooting_images_newest/10366.jpg	[{'emotion': 'Excitement', 'intensity': '1', 'reason': 'actually not familiar with the topic '}, {'emotion': 'Fear', 'intensity': '4', 'reason': 'Fear of the shooting might happen'}, {'emotion': 'Excitement', 'intensity': '3', 'reason': 'most people are rational and want to stand out to fight for peaceful and safe life'}, {'emotion': 'Fear', 'intensity': '3', 'reason': 'I do not like it '}, {'emo…
67	Doves fly, hundreds form human chain and marquees go dark for 1 year anniversary of Las Vegas shooting	anonymous-source/all_shooting_images_newest/100288.jpg	[{'emotion': 'Excitement', 'intensity': '1', 'reason': 'actually not familiar with the topic '}, {'emotion': 'Excitement', 'intensity': '3', 'reason': "I'm glad that they remind people of what happened."}, {'emotion': 'Sadness', 'intensity': '3', 'reason': 'the trauma lasts'}, {'emotion': 'Sadness', 'intensity': '3', 'reason': 'I do not like it '}, {'emotion': 'Sadness', 'intensity': '4', 'reason…
68	Naperville students remember shooting victims, call for gun reform during national school walkout	anonymous-source/all_shooting_images_newest/10590.jpg	[{'emotion': 'Excitement', 'intensity': '3', 'reason': 'more and more students are paying attention on this problem'}, {'emotion': 'Excitement', 'intensity': '4', 'reason': 'I wonder what affects it will have on the gun control.'}, {'emotion': 'Sadness', 'intensity': '3', 'reason': 'students were negatively affected by gun violence at a young age'}, {'emotion': 'Fear', 'intensity': '3', 'reason':…
70	Griffith student charged with accidentally bringing loaded gun inside high school	anonymous-source/all_shooting_images_newest/10112.jpg	[{'emotion': 'Fear', 'intensity': '3', 'reason': "students' life may be put in danger "}, {'emotion': 'Fear', 'intensity': '3', 'reason': "I don't believe it's accidental."}, {'emotion': 'Anger', 'intensity': '3', 'reason': 'why student at that age can have access to the gun'}, {'emotion': 'Excitement', 'intensity': '3', 'reason': 'I think it is interesting'}, {'emotion': 'Contentment', 'intensit…
71	More than 20,000 Americans a year kill themselves with a gun. Alarmed gun sellers are joining the suicide prevention fight.	anonymous-source/all_shooting_images_newest/90109.jpg	[{'emotion': 'Sadness', 'intensity': '3', 'reason': 'so many people choose gun to consider suicide '}, {'emotion': 'Excitement', 'intensity': '3', 'reason': "I think it's ironic that the sellers are joining the suicide prevention fight, because the sellers indirectly kill them by selling guns to them."}, {'emotion': 'Sadness', 'intensity': '3', 'reason': "if they hadn't had access to gun, they ma…
73	U.S. judge halts release of blueprints for 3-D printed guns	anonymous-source/all_shooting_images_newest/296.jpg	[{'emotion': 'Excitement', 'intensity': '3', 'reason': '3-D printed guns should be avoided. '}, {'emotion': 'Anger', 'intensity': '4', 'reason': 'Why would they release a blueprint for guns? It might cause more gun issues.'}, {'emotion': 'Contentment', 'intensity': '3', 'reason': "there's someone in this Country notice the problem"}, {'emotion': 'Anger', 'intensity': '3', 'reason': 'I do not like…
78	School shootings will scar a generation of students	anonymous-source/all_shooting_images_newest/10732.jpg	[{'emotion': 'Sadness', 'intensity': '3', 'reason': 'students are involved in gun problems as well '}, {'emotion': 'Sadness', 'intensity': '3', 'reason': "I feel sad because it's true. "}, {'emotion': 'Sadness', 'intensity': '5', 'reason': 'the trauma lasts. students should not have experienced these at a very young age'}, {'emotion': 'Sadness', 'intensity': '3', 'reason': 'I do not like it '}, {…
80	Retired firefighter found guilty for shooting at lost black teen on doorstep	anonymous-source/all_shooting_images_newest/100223.jpg	[{'emotion': 'Anger', 'intensity': '2', 'reason': 'I just think that news is sensational'}, {'emotion': 'Anger', 'intensity': '3', 'reason': 'racist and a teenager got gun shot'}, {'emotion': 'Sadness', 'intensity': '4', 'reason': "I don't know the background of the event but it makes it seem like the teen was innocent and did not deserve to get shot."}, {'emotion': 'Disgust', 'intensity': '3', '…
84	Massacre fatigue: Do we ignore shootings?	anonymous-source/all_shooting_images_newest/110491.jpg	[{'emotion': 'Contentment', 'intensity': '1', 'reason': 'You should add annoyed into the list of emotions please.'}, {'emotion': 'Excitement', 'intensity': '3', 'reason': 'gun problem is being paid more attention '}, {'emotion': 'Sadness', 'intensity': '3', 'reason': "I don't necessarily agree with this statement/question. I think we have a lot of work left to do but we have made some progress."}…
89	Me + You Productions Spring Awakening advocates for gun control HS Insider	anonymous-source/all_shooting_images_newest/90380.jpg	[{'emotion': 'Awe', 'intensity': '1', 'reason': 'Again, I do not understand this sentence or headline '}, {'emotion': 'Excitement', 'intensity': '3', 'reason': 'gun problem is being paid more attention '}, {'emotion': 'Contentment', 'intensity': '3', 'reason': 'It makes me safer to know that people are fighting for stricter gun control policies.'}, {'emotion': 'Contentment', 'intensity': '3', 're…
91	California bar massacre leaves another American community reeling after 12 gunned down by Marine veteran	anonymous-source/all_shooting_images_newest/110043.jpg	[{'emotion': 'Awe', 'intensity': '1', 'reason': 'Its shocking that someone can do this'}, {'emotion': 'Excitement', 'intensity': '3', 'reason': 'gun problem is being paid more attention '}, {'emotion': 'Sadness', 'intensity': '4', 'reason': 'many of our veterans come home without good support and I feel like we can and should be doing a better job at taking care of our veterans. Especially those …
106	Las Vegas Shooting: Retired Carpenter Builds New Memorial of 58 Crosses Ahead of Anniversary	anonymous-source/all_shooting_images_newest/90220.jpg	[{'emotion': 'Excitement', 'intensity': '1', 'reason': 'actually no special feelings'}, {'emotion': 'Sadness', 'intensity': '3', 'reason': 'so many people were killed by guns.'}, {'emotion': 'Fear', 'intensity': '3', 'reason': 'there is shooting event'}, {'emotion': 'Sadness', 'intensity': '4', 'reason': "It's so sad that 58 innocent people died because of a tragic mass shooting."}, {'emotion': '…
114	Top Senate Dem admits: No gun control law would have stopped Santa Fe massacre	anonymous-source/all_shooting_images_newest/10385.jpg	[{'emotion': 'Anger', 'intensity': '3', 'reason': 'no special feelings'}, {'emotion': 'Sadness', 'intensity': '3', 'reason': "there's no law can stop gun problem. "}, {'emotion': 'Fear', 'intensity': '5', 'reason': 'No law works means people over Santa Fe will be exposed to violence, which are strict to people living there.'}, {'emotion': 'Fear', 'intensity': '3', 'reason': "Its very scary that e…
116	The Latest: Victim's family marks anniversary of shooting	anonymous-source/all_shooting_images_newest/90248.jpg	[{'emotion': 'Sadness', 'intensity': '3', 'reason': "feel sad about victim's family"}, {'emotion': 'Sadness', 'intensity': '3', 'reason': 'just sad about those people who lost family memebers due to gun shot. '}, {'emotion': 'Sadness', 'intensity': '3', 'reason': 'The anniversary sounds ironic, which make me feel pity on what the family has experienced.'}, {'emotion': 'Sadness', 'intensity': '3',…
119	Tamera Mowry Calls for Gun Control on 'The Real' After Niece Died in Thousand Oaks Shooting	anonymous-source/all_shooting_images_newest/110249.jpg	[{'emotion': 'Sadness', 'intensity': '3', 'reason': 'sorry about the loss first, then feel angry about the violence'}, {'emotion': 'Sadness', 'intensity': '3', 'reason': 'For one more people died from a gunshot, and hope this can bring some changes. '}, {'emotion': 'Contentment', 'intensity': '4', 'reason': 'It is a must to reduce the trauma in the country. Peace should be welcomed instead.'}, {'…
120	Suspect In Fatal Kroger Shooting First Tried To Get Inside Black Church: Police	anonymous-source/all_shooting_images_newest/100083.jpg	[{'emotion': 'Fear', 'intensity': '3', 'reason': '.'}, {'emotion': 'Fear', 'intensity': '3', 'reason': "Because he had attempted first to go somewhere that is supposed to be a safe place of worship, it also implies his actions were racially motivated, which is disgusting and a reminder that racism is still very much present in today's America. "}, {'emotion': 'Excitement', 'intensity': '3', 'reas…
122	Bucking the NRA, Florida governor signs landmark gun control legislation	anonymous-source/all_shooting_images_newest/10588.jpg	[{'emotion': 'Contentment', 'intensity': '3', 'reason': '.'}, {'emotion': 'Contentment', 'intensity': '3', 'reason': 'seeing the governor finally decide to allocate money to something that is worth keeping the children and community of his state safe gives me hope, especially since Florida is usually out of wack when it comes to gun control. '}, {'emotion': 'Disgust', 'intensity': '3', 'reason': …
123	California bans gun sales to people under 21	anonymous-source/all_shooting_images_newest/90321.jpg	[{'emotion': 'Contentment', 'intensity': '3', 'reason': '.'}, {'emotion': 'Contentment', 'intensity': '3', 'reason': 'seeing how many suspects of school shooting are so young, it gives me hope that this rule will make somewhat of a difference in preventing tragedy '}, {'emotion': 'Sadness', 'intensity': '3', 'reason': '1'}, {'emotion': 'Excitement', 'intensity': '4', 'reason': 'they are doing wha…
127	Mom: Thanks to active-shooter drills at school, my 4-year-old thought fireworks were gunshots. Enough already.	anonymous-source/all_shooting_images_newest/110494.jpg	[{'emotion': 'Fear', 'intensity': '3', 'reason': '.'}, {'emotion': 'Sadness', 'intensity': '3', 'reason': 'seeing how this affects children at such a young age is so upsetting. Also as a parent knowing things like this do not happen to children who live in other countries makes me question my decision to raise. a family in America, somewhere I am supposed to be proud to call home'}, {'emotion': '…
133	New restrictions on gun ownership signed into law by California Gov. Jerry Brown, a Democrat	anonymous-source/all_shooting_images_newest/90326.jpg	[{'emotion': 'Contentment', 'intensity': '3', 'reason': '.'}, {'emotion': 'Contentment', 'intensity': '3', 'reason': 'things are moving in the right direction'}, {'emotion': 'Contentment', 'intensity': '4', 'reason': 'some progress '}, {'emotion': 'Contentment', 'intensity': '3', 'reason': 'finally the legislation improved'}, {'emotion': 'Fear', 'intensity': '3', 'reason': 'Feeling fear when I he…
135	South Florida billionaire: I won't give any money to politicians who don't support gun control	anonymous-source/all_shooting_images_newest/10665.jpg	[{'emotion': 'Contentment', 'intensity': '3', 'reason': '.'}, {'emotion': 'Contentment', 'intensity': '3', 'reason': 'he does not owe anything to anyone and taking a stance that is likely not the popular opinion of the people surrounding him is helpful. People admire people of power and maybe this statement will cause his fellow Floridians to reevaluate their opinion on gun violence and gun contr…
140	Police: San Jose teacher suspected in road rage incident arrested in classroom with loaded gun	anonymous-source/all_shooting_images_newest/69.jpg	[{'emotion': 'Fear', 'intensity': '3', 'reason': 'The kids must have been terrified!'}, {'emotion': 'Fear', 'intensity': '4', 'reason': 'the teacher knows all of the lockdown procedures which would make it easier to get to the children.'}, {'emotion': 'Contentment', 'intensity': '3', 'reason': 'Justice was served'}, {'emotion': 'Fear', 'intensity': '4', 'reason': 'It seems kids are not safe with …
141	New York Today: Survivors of Gun Violence	anonymous-source/all_shooting_images_newest/10428.jpg	[{'emotion': 'Sadness', 'intensity': '3', 'reason': "What's happening in this city is a disaster."}, {'emotion': 'Awe', 'intensity': '4', 'reason': 'I have great respect and compassion for survivors in gun violence'}, {'emotion': 'Sadness', 'intensity': '3', 'reason': 'of the trauma and pain survivors exprienced'}, {'emotion': 'Awe', 'intensity': '1', 'reason': "I actually don't feel anything. Ju…
143	California governor signs bill to raise age requirement to 21 for purchase of rifles, shotguns	anonymous-source/all_shooting_images_newest/90007.jpg	[{'emotion': 'Contentment', 'intensity': '3', 'reason': 'Stricter age limits could make it harder to get guns'}, {'emotion': 'Excitement', 'intensity': '4', 'reason': 'This is a significant advancement for gun safety'}, {'emotion': 'Contentment', 'intensity': '3', 'reason': 'this will prevent young people from having a gun and hopefully reduce shootings'}, {'emotion': 'Anger', 'intensity': '1', '…
144	EA Launches Safety Review in Wake of Jacksonville Shooting	anonymous-source/all_shooting_images_newest/291.jpg	[{'emotion': 'Contentment', 'intensity': '3', 'reason': 'Anyway, safety is the first priority'}, {'emotion': 'Contentment', 'intensity': '4', 'reason': 'This appears to be an appropriate response'}, {'emotion': 'Contentment', 'intensity': '3', 'reason': 'they are preventing future shootings'}, {'emotion': 'Anger', 'intensity': '1', 'reason': 'They should be doing this before the shooting maybe'},…
145	Shares of Gun Makers Rally Ahead of Election Outcome	anonymous-source/all_shooting_images_newest/110455.jpg	[{'emotion': 'Fear', 'intensity': '3', 'reason': 'In short, guns must be strictly controlled'}, {'emotion': 'Fear', 'intensity': '4', 'reason': 'This implies use of force if their desired candidate does not win '}, {'emotion': 'Anger', 'intensity': '3', 'reason': 'they are going to rally before the election outcome'}, {'emotion': 'Disgust', 'intensity': '2', 'reason': "What's this obsession with …
148	NRA Is Losing Major Sponsors and Partners Amid Calls for a Boycott	anonymous-source/all_shooting_images_newest/10127.jpg	[{'emotion': 'Contentment', 'intensity': '3', 'reason': 'Let NRA die'}, {'emotion': 'Excitement', 'intensity': '4', 'reason': 'The NRA perpetuates violence and should lose its sponsors'}, {'emotion': 'Sadness', 'intensity': '3', 'reason': 'people who work in NRA are going to suffer and not be able to get as much money as before to support themselves and their families'}, {'emotion': 'Contentment'…
149	Ex- FBI agent: In an era of mass shootings, some advice on safety	anonymous-source/all_shooting_images_newest/98.jpg	[{'emotion': 'Contentment', 'intensity': '3', 'reason': 'More action is needed than just advice'}, {'emotion': 'Amusement', 'intensity': '4', 'reason': 'The title grabs your attention '}, {'emotion': 'Sadness', 'intensity': '3', 'reason': 'Its sad that a lot of mass shooting have occurred to a point where the FBI agent was considered to be in an era of mass shootings. Its sad to think of all the …
150	EA cancels eSports tournament amid security fears after Jacksonville shooting	anonymous-source/all_shooting_images_newest/90.jpg	[{'emotion': 'Sadness', 'intensity': '3', 'reason': "The shootings brought a very bad experience to people's lives"}, {'emotion': 'Sadness', 'intensity': '4', 'reason': 'It is unfortunate that we can not fully live our lives without fear of gun violence'}, {'emotion': 'Contentment', 'intensity': '3', 'reason': 'Im happy they cancelled the tournament to make sure everyone is going to be safe first…
151	What to Do When There s an Active Shooter	anonymous-source/all_shooting_images_newest/10464.jpg	[{'emotion': 'Fear', 'intensity': '3', 'reason': "I really don't know what to do"}, {'emotion': 'Amusement', 'intensity': '4', 'reason': 'My interest is peaked because this is a very relevant topic'}, {'emotion': 'Sadness', 'intensity': '3', 'reason': 'its sad to think we have gotten to a point where there are so many mass shooting that there is news headlines on what to do if there is an active …
152	Trump: I'd have rushed into Florida school during shooting Video	anonymous-source/all_shooting_images_newest/10469.jpg	[{'emotion': 'Awe', 'intensity': '3', 'reason': "He'd better do that"}, {'emotion': 'Disgust', 'intensity': '4', 'reason': 'The only place Donald Trump is running into is a wig shop '}, {'emotion': 'Sadness', 'intensity': '3', 'reason': 'of all the kids hurt in the school shooting'}, {'emotion': 'Amusement', 'intensity': '2', 'reason': 'I really really doubt that'}, {'emotion': 'Awe', 'intensity'…
157	Eiffel Tower goes dark to honor Pittsburgh shooting victims	anonymous-source/all_shooting_images_newest/100494.jpg	[{'emotion': 'Sadness', 'intensity': '3', 'reason': 'I feel sorry for the tragedy'}, {'emotion': 'Contentment', 'intensity': '4', 'reason': 'The display of unity is touching '}, {'emotion': 'Sadness', 'intensity': '3', 'reason': 'of people killed'}, {'emotion': 'Awe', 'intensity': '2', 'reason': 'Human compassion is universal and touching'}, {'emotion': 'Sadness', 'intensity': '3', 'reason': 'I f…
164	Senators want Facebook, Google to block access to 3D printed gun files	anonymous-source/all_shooting_images_newest/320.jpg	[{'emotion': 'Excitement', 'intensity': '4', 'reason': 'They should block them.'}, {'emotion': 'Excitement', 'intensity': '1', 'reason': 'yes, yes they should'}, {'emotion': 'Contentment', 'intensity': '3', 'reason': 'i understnad why they want this'}, {'emotion': 'Contentment', 'intensity': '2', 'reason': 'I am not sure what they are saying or what this means, I would have to read on to find out…
166	US military adds more than 4,000 names to gun background check database after Texas mass shooting	anonymous-source/all_shooting_images_newest/10461.jpg	[{'emotion': 'Contentment', 'intensity': '5', 'reason': 'More background checks are needed.'}, {'emotion': 'Sadness', 'intensity': '2', 'reason': 'good, it should be more robust anyway'}, {'emotion': 'Contentment', 'intensity': '3', 'reason': 'they are finally doing whats right'}, {'emotion': 'Contentment', 'intensity': '4', 'reason': 'Happy to see action being taken even in the most conservative…
170	Pittsburgh synagogue shooting suspect indicted on federal hate crime charges, faces 535 years	anonymous-source/all_shooting_images_newest/110518.jpg	[{'emotion': 'Contentment', 'intensity': '5', 'reason': 'He deserves it.'}, {'emotion': 'Excitement', 'intensity': '4', 'reason': 'he deserves it '}, {'emotion': 'Sadness', 'intensity': '3', 'reason': 'the event was tragic and he deserved what he got'}, {'emotion': 'Contentment', 'intensity': '4', 'reason': 'This person should not have the right to freedom again, they are a danger to society. '},…
172	Donald Trump Jr. Uses YouTube Shooting To Make Incoherent Rant About The Left	anonymous-source/all_shooting_images_newest/10828.jpg	[{'emotion': 'Anger', 'intensity': '5', 'reason': 'He will use any opportunity to blame things on the left.'}, {'emotion': 'Disgust', 'intensity': '5', 'reason': 'of course he did'}, {'emotion': 'Disgust', 'intensity': '3', 'reason': 'he is an idiot who doesnt know what he is talking about'}, {'emotion': 'Disgust', 'intensity': '3', 'reason': 'Please shut up, no one wants to hear from you, DTJ. '…
176	After Pittsburgh synagogue shooting, Squirrel Hill residents shaken but not surprised	anonymous-source/all_shooting_images_newest/100344.jpg	[{'emotion': 'Sadness', 'intensity': '5', 'reason': 'Shootings have become normal to many people.'}, {'emotion': 'Awe', 'intensity': '3', 'reason': 'yeop thats the feeling '}, {'emotion': 'Sadness', 'intensity': '3', 'reason': 'the world has come to such a tragic place as to where people are no longer surprised by acts like this'}, {'emotion': 'Contentment', 'intensity': '4', 'reason': 'I agree w…
177	ShotSpotter, a gunshot detection system, goes live in Calumet City	anonymous-source/all_shooting_images_newest/10141.jpg	[{'emotion': 'Excitement', 'intensity': '4', 'reason': 'I am excited to see if it will work/be beneficial.'}, {'emotion': 'Fear', 'intensity': '3', 'reason': 'what is it and how will it work?'}, {'emotion': 'Contentment', 'intensity': '3', 'reason': 'not enough info in the title need more to form an opinion'}, {'emotion': 'Sadness', 'intensity': '4', 'reason': "Glad to see technology working to h…
178	New Jersey mom credited with stopping potential school shooting in Kentucky	anonymous-source/all_shooting_images_newest/100347.jpg	[{'emotion': 'Awe', 'intensity': '4', 'reason': 'I am impressed, but sad because she shouldnt have to do that.'}, {'emotion': 'Disgust', 'intensity': '5', 'reason': 'how and dont blame just her'}, {'emotion': 'Awe', 'intensity': '3', 'reason': 'it shows the power one person can have'}, {'emotion': 'Awe', 'intensity': '4', 'reason': 'What a badass, we need more people like her. '}, {'emotion': 'Co…
185	PayPal bans Gab in wake of Pittsburgh mass shooting	anonymous-source/all_shooting_images_newest/100225.jpg	[{'emotion': 'Contentment', 'intensity': '3', 'reason': 'someone is being held accountable even in the smallest way. '}, {'emotion': 'Contentment', 'intensity': '4', 'reason': 'it is good when companies ban bad things'}, {'emotion': 'Sadness', 'intensity': '3', 'reason': "I don't know what Gab is"}, {'emotion': 'Contentment', 'intensity': '2', 'reason': 'this method can reduce gun violence some w…
188	Mass shootings 'increasing'and pose'most serious threat' in US, expert says	anonymous-source/all_shooting_images_newest/110490.jpg	[{'emotion': 'Fear', 'intensity': '4', 'reason': 'I feel scared for my life in places I should not, like the grocery store or the movie theaters. '}, {'emotion': 'Fear', 'intensity': '4', 'reason': 'I am scared that I will be a victim next'}, {'emotion': 'Fear', 'intensity': '3', 'reason': "it's something everyone has to worry about."}, {'emotion': 'Anger', 'intensity': '3', 'reason': 'it notify …
192	Trump blames Thousand Oaks shooting on ex-Marine's PTSD	anonymous-source/all_shooting_images_newest/110383.jpg	[{'emotion': 'Anger', 'intensity': '4', 'reason': 'it should be blamed on the system that allowed an individual suffering from PTSD the right to a gun.'}, {'emotion': 'Anger', 'intensity': '4', 'reason': "while the ex marine's PTSD is sad, the reason for this shooting is because he had access to a gun."}, {'emotion': 'Sadness', 'intensity': '3', 'reason': "you can't just blame it on his PTSD."}, …
197	Trump's comments leave gun debate paused in Congress	anonymous-source/all_shooting_images_newest/10595.jpg	[{'emotion': 'Sadness', 'intensity': '4', 'reason': 'it makes me frustrated '}, {'emotion': 'Anger', 'intensity': '4', 'reason': 'Trump is not allowing for progress'}, {'emotion': 'Sadness', 'intensity': '3', 'reason': "there's so much disagreement on this topic"}, {'emotion': 'Anger', 'intensity': '2', 'reason': 'we should try to ban the gun'}, {'emotion': 'Anger', 'intensity': '3', 'reason': 'a…
201	South Carolina lawmaker pulls out loaded gun during constituent meeting, audience says	anonymous-source/all_shooting_images_newest/10381.jpg	[{'emotion': 'Disgust', 'intensity': '4', 'reason': 'There is no reason why a gun should be pulled out at a meeting.'}, {'emotion': 'Fear', 'intensity': '4', 'reason': 'We have put the wrong people in power'}, {'emotion': 'Fear', 'intensity': '4', 'reason': "I can't believe a lawyer would actually do that. Lawyers are taught how to follow the law and should be the ones upholding the law. The fact…
203	Las Vegas gunman became unstable but didn't raise suspicions	anonymous-source/all_shooting_images_newest/116.jpg	[{'emotion': 'Fear', 'intensity': '3', 'reason': 'Mental health issues in America are not addressed well and it shows through the high amounts of unhappy people in the US and those who are mentally unstable enough to do a mass shooting.'}, {'emotion': 'Anger', 'intensity': '4', 'reason': 'How did no one do anything about this?'}, {'emotion': 'Fear', 'intensity': '4', 'reason': 'people who are uns…
206	Las Vegas shooting: Memorial events mark 1-year anniversary as massacre motive still shrouded in mystery	anonymous-source/all_shooting_images_newest/100424.jpg	[{'emotion': 'Sadness', 'intensity': '3', 'reason': 'of the tragic event that transpired and the victims.'}, {'emotion': 'Sadness', 'intensity': '4', 'reason': 'This was a very upsetting episode '}, {'emotion': 'Sadness', 'intensity': '4', 'reason': 'This event was a huge tragedy and I remember hearing about it for the first time. It makes me sad to know that people can actually do terrible thing…
207	Worried about gun violence, more than 20 Illinois schools install blue emergency boxes that notify police of an active shooter	anonymous-source/all_shooting_images_newest/90355.jpg	[{'emotion': 'Contentment', 'intensity': '3', 'reason': 'I think that is a good way to keep students safe.'}, {'emotion': 'Anger', 'intensity': '3', 'reason': 'They need to change gun laws not install blue lights'}, {'emotion': 'Contentment', 'intensity': '4', 'reason': 'it shows me that people are actively trying to make schools safer in order to prevent further tragedys. With these blue emergen…
210	Security concerns come to light following shooting outside Mount Sinai Hospital	anonymous-source/all_shooting_images_newest/10023.jpg	[{'emotion': 'Fear', 'intensity': '3', 'reason': 'how much security is going to be enough? We live in a subtle but constant state of fear when out in public'}, {'emotion': 'Contentment', 'intensity': '4', 'reason': 'This is an appropriate reaction '}, {'emotion': 'Fear', 'intensity': '4', 'reason': 'there has been a pattern where changes only happen after a tragedy. I would hope that people start…
215	Trump suggests arming teachers at emotional meeting with shooting survivors	anonymous-source/all_shooting_images_newest/10539.jpg	[{'emotion': 'Disgust', 'intensity': '3', 'reason': "that is an awful idea. That's just fighting fire with fire."}, {'emotion': 'Disgust', 'intensity': '5', 'reason': 'This is a terrible idea'}, {'emotion': 'Sadness', 'intensity': '4', 'reason': "It really makes me sad to know that we have gotten to this point of the discussion. I can't imagine seeing my teacher with a gun and it shows me how bad…
217	School shooting threats, even when no guns are fired, can heighten anxiety among students	anonymous-source/all_shooting_images_newest/100349.jpg	[{'emotion': 'Sadness', 'intensity': '3', 'reason': 'that is just a sad reality that students face in this world.'}, {'emotion': 'Contentment', 'intensity': '5', 'reason': 'Obviously '}, {'emotion': 'Sadness', 'intensity': '4', 'reason': "I think this is completely true. Pretty much anyone in the world would get nervous around a school shooting threat. There have been so many and it has all been …
219	Son Of Witness: Suspect In Fatal Kroger Shooting Said 'Whites Don't Kill Whites'	anonymous-source/all_shooting_images_newest/100236.jpg	[{'emotion': 'Disgust', 'intensity': '3', 'reason': "It implies whites don't kill whites, they kill other races and ethnicities"}, {'emotion': 'Anger', 'intensity': '4', 'reason': 'thats racist'}, {'emotion': 'Anger', 'intensity': '5', 'reason': 'Deadly racism '}, {'emotion': 'Disgust', 'intensity': '4', 'reason': "it's just not true."}, {'emotion': 'Anger', 'intensity': '2', 'reason': 'The title…
220	A Mall Shooting, a Black Man s Death, and a Debate Over Race and Gun Rights	anonymous-source/all_shooting_images_newest/110088.jpg	[{'emotion': 'Sadness', 'intensity': '4', 'reason': 'Because it describes the loss of a life.'}, {'emotion': 'Sadness', 'intensity': '4', 'reason': 'people dying is sad'}, {'emotion': 'Sadness', 'intensity': '1', 'reason': 'BIG Contrast. The headline contains no affection while the fact is brutal itself. '}, {'emotion': 'Anger', 'intensity': '4', 'reason': "its' frustrating that we have to debate…
225	Gun violence, health care among top concerns for women, especially minorities, new survey finds	anonymous-source/all_shooting_images_newest/100311.jpg	[{'emotion': 'Sadness', 'intensity': '4', 'reason': 'That minorities and women are facing serious gun violence issues.'}, {'emotion': 'Sadness', 'intensity': '4', 'reason': 'its sad that people have to worry about gun violence'}, {'emotion': 'Contentment', 'intensity': '3', 'reason': 'That fits the common sense. We need more surveys like that. '}, {'emotion': 'Excitement', 'intensity': '4', 'reas…
227	The NRA's congressional influence is bad. Its judicial clout could be worse.	anonymous-source/all_shooting_images_newest/90480.jpg	[{'emotion': 'Contentment', 'intensity': '3', 'reason': 'I am happy people are recognizing the NRA as a harmful organization.'}, {'emotion': 'Anger', 'intensity': '4', 'reason': 'i hate the nra'}, {'emotion': 'Contentment', 'intensity': '3', 'reason': 'Though the headline is subjective but I believe they are telling truth. '}, {'emotion': 'Fear', 'intensity': '3', 'reason': 'the NRA is scary in h…
228	Cincinnati Reds to hold Moment of Silence for Fifth Third Center shooting victims	anonymous-source/all_shooting_images_newest/90452.jpg	[{'emotion': 'Contentment', 'intensity': '3', 'reason': 'I am happy they are paying respect to the lost victims of this shooting.'}, {'emotion': 'Sadness', 'intensity': '4', 'reason': 'because people were hurt or killed in a shooting'}, {'emotion': 'Sadness', 'intensity': '3', 'reason': 'A sad scene. '}, {'emotion': 'Sadness', 'intensity': '3', 'reason': "shootings are so often now this isn't eve…
231	White House struggles to outline specific efforts made to stop mass shootings	anonymous-source/all_shooting_images_newest/10655.jpg	[{'emotion': 'Anger', 'intensity': '4', 'reason': 'There need to be specific efforts made to stop gun violence.'}, {'emotion': 'Anger', 'intensity': '4', 'reason': 'they should be able to get it together and figure it out because something needs to change'}, {'emotion': 'Contentment', 'intensity': '3', 'reason': 'White House should be responsible '}, {'emotion': 'Anger', 'intensity': '4', 'reason…
239	3-D Printed Gun Blueprints Are Back, and Only New Laws Can Stop Them	anonymous-source/all_shooting_images_newest/299.jpg	[{'emotion': 'Fear', 'intensity': '3', 'reason': '3D printed guns could be on the rise.'}, {'emotion': 'Anger', 'intensity': '4', 'reason': 'i want these to stop '}, {'emotion': 'Fear', 'intensity': '2', 'reason': 'Only new laws can stop them make them threatening to the public health now'}, {'emotion': 'Fear', 'intensity': '5', 'reason': "Everyone around me probably had a gun, but I didn't, so t…
243	How gun background checks work	anonymous-source/all_shooting_images_newest/10138.jpg	[{'emotion': 'Contentment', 'intensity': '5', 'reason': 'I agree.'}, {'emotion': 'Contentment', 'intensity': '4', 'reason': 'more progress related to ban '}, {'emotion': 'Contentment', 'intensity': '2', 'reason': 'It covers some knowledge about guns'}, {'emotion': 'Fear', 'intensity': '4', 'reason': 'That even government officials are worried proves that the problem is indeed serious.'}, {'emotio…
245	Teachers who survived shootings at Columbine, Sandy Hook, and Rancho Tehama discuss going back into the classroom.	anonymous-source/all_shooting_images_newest/90037.jpg	[{'emotion': 'Excitement', 'intensity': '5', 'reason': 'I am happy to see them getting back into work.'}, {'emotion': 'Sadness', 'intensity': '4', 'reason': 'feel sad about what they went through '}, {'emotion': 'Awe', 'intensity': '4', 'reason': 'It must be traumatizing to survive shootings'}, {'emotion': 'Contentment', 'intensity': '4', 'reason': 'He has no sympathy for the victims, so quitting…
250	Rep. Steve Scalise Shooting News & Videos	anonymous-source/all_shooting_images_newest/10102.jpg	[{'emotion': 'Excitement', 'intensity': '1', 'reason': 'Not much to take from this.'}, {'emotion': 'Anger', 'intensity': '4', 'reason': 'surprised about his behaviors '}, {'emotion': 'Amusement', 'intensity': '2', 'reason': 'I don’t quite understand this title.'}, {'emotion': 'Sadness', 'intensity': '4', 'reason': 'I feel sorry for the victims.'}, {'emotion': 'Sadness', 'intensity': '4', 'reason'…
252	Obama calls on Americans 'to fight the rise of anti-Semitism' after synagogue shooting	anonymous-source/all_shooting_images_newest/100452.jpg	[{'emotion': 'Contentment', 'intensity': '5', 'reason': 'I agree.'}, {'emotion': 'Contentment', 'intensity': '4', 'reason': 'we should fight against racism '}, {'emotion': 'Awe', 'intensity': '4', 'reason': 'This point of view would alleviate the issue.'}, {'emotion': 'Sadness', 'intensity': '4', 'reason': 'Sadly, the Department of Education is letting teachers buy guns because the prevalence of …
255	How We Mourned' memorializes Las Vegas mass shooting	anonymous-source/all_shooting_images_newest/90038.jpg	[{'emotion': 'Sadness', 'intensity': '3', 'reason': 'The Las Vegas shooting was a tragedy.'}, {'emotion': 'Sadness', 'intensity': '3', 'reason': 'feel bad about the victims '}, {'emotion': 'Sadness', 'intensity': '4', 'reason': 'Because innocent people were killed in the shooting.'}, {'emotion': 'Fear', 'intensity': '4', 'reason': "People shouldn't have guns when they're young."}, {'emotion': 'Sa…
256	Alabama mall shooting: Police admit they killed innocent black man by mistake as true Thanksgiving gunman remains at large	anonymous-source/all_shooting_images_newest/110505.jpg	[{'emotion': 'Disgust', 'intensity': '5', 'reason': 'Things like this happen all the time to black people.'}, {'emotion': 'Anger', 'intensity': '4', 'reason': "I think the police's action was really bad "}, {'emotion': 'Anger', 'intensity': '2', 'reason': 'Policemen apologize for killing a human life.'}, {'emotion': 'Anger', 'intensity': '4', 'reason': 'I am outraged by this gratuitous racial dis…
263	Judge blocks release of 3D-printed gun plans one day after Jacksonville Madden shooting	anonymous-source/all_shooting_images_newest/162.jpg	[{'emotion': 'Contentment', 'intensity': '3', 'reason': 'Im happy judge is preventing the release of 3D guns so there is less guns given to people and hopefully less shooting'}, {'emotion': 'Fear', 'intensity': '3', 'reason': 'I think there might be more unsupervised 3D printing guns models online in the future '}, {'emotion': 'Excitement', 'intensity': '1', 'reason': "good but should've done thi…
270	The World Moves On And You Don t. Parents Who Lost Children in School Shootings Find Comfort in a Group No One Wants to Join	anonymous-source/all_shooting_images_newest/110437.jpg	[{'emotion': 'Sadness', 'intensity': '3', 'reason': 'Its sad to think of the pain that parents face after their children are killed'}, {'emotion': 'Sadness', 'intensity': '3', 'reason': 'Narratives make me empathy'}, {'emotion': 'Sadness', 'intensity': '3', 'reason': 'sad to lose a kid'}, {'emotion': 'Awe', 'intensity': '4', 'reason': 'Such tragedy bringing people together makes me grateful for w…
273	Breaking: Judge issues big decision on 3D printed guns hours before midnight deadline	anonymous-source/all_shooting_images_newest/171.jpg	[{'emotion': 'Contentment', 'intensity': '3', 'reason': 'Im happy that the judge made a big decision on printed guns and Im assuming that he made a decision to make restrictions to have printed guns'}, {'emotion': 'Fear', 'intensity': '3', 'reason': 'The word "Break" in the headline makes me feel nervous'}, {'emotion': 'Fear', 'intensity': '1', 'reason': '3d guns are dumb'}, {'emotion': 'Sadness'…
275	Parkland survivors keep memory of shooting alive	anonymous-source/all_shooting_images_newest/10004.jpg	[{'emotion': 'Sadness', 'intensity': '3', 'reason': 'Its sad to think about people who were killed in shooting'}, {'emotion': 'Awe', 'intensity': '3', 'reason': "It's nice that people remember. "}, {'emotion': 'Fear', 'intensity': '1', 'reason': 'were truly traumatizing these kids'}, {'emotion': 'Sadness', 'intensity': '3', 'reason': 'This is a very tragic event '}, {'emotion': 'Fear', 'intensity…
277	Dick's Sporting Goods' rough quarter had nothing to do with guns	anonymous-source/all_shooting_images_newest/72.jpg	[{'emotion': 'Contentment', 'intensity': '3', 'reason': "I don't undestand the headline"}, {'emotion': 'Contentment', 'intensity': '3', 'reason': "I'd like to see guns being regulated."}, {'emotion': 'Contentment', 'intensity': '1', 'reason': "okay I don't care about dicks loss in revenue "}, {'emotion': 'Amusement', 'intensity': '3', 'reason': 'This could be a counter to the argument that gun pu…
280	Giffords, Nevada Democrats meet 1 year after Vegas shooting	anonymous-source/all_shooting_images_newest/100174.jpg	[{'emotion': 'Anger', 'intensity': '3', 'reason': 'Useless government...'}, {'emotion': 'Sadness', 'intensity': '3', 'reason': 'its sad'}, {'emotion': 'Awe', 'intensity': '3', 'reason': 'I want to know what they will talk about.'}, {'emotion': 'Sadness', 'intensity': '3', 'reason': 'It is a sad story that the gun control still need to be improved'}, {'emotion': 'Sadness', 'intensity': '3', 'reaso…
282	Sen. Nybo urges Gov. Rauner to sign SB 337, gun dealer licensure bill	anonymous-source/all_shooting_images_newest/90347.jpg	[{'emotion': 'Fear', 'intensity': '4', 'reason': 'Maybe many people will die one day because of this.'}, {'emotion': 'Contentment', 'intensity': '3', 'reason': 'not much to say'}, {'emotion': 'Contentment', 'intensity': '3', 'reason': 'A licensure bill may be helpful in gun control.'}, {'emotion': 'Contentment', 'intensity': '3', 'reason': "Don't understand what this news what to talk about"}, {'…
286	When the Second Amendment threatens the First, mass shootings are more likely	anonymous-source/all_shooting_images_newest/10155.jpg	[{'emotion': 'Fear', 'intensity': '3', 'reason': "It will aggravate people's anxiety about the proliferation of guns."}, {'emotion': 'Awe', 'intensity': '3', 'reason': 'taken aback'}, {'emotion': 'Fear', 'intensity': '3', 'reason': 'I am afraid of mass shootings.'}, {'emotion': 'Fear', 'intensity': '3', 'reason': 'You always can tell which person will become shooter because they usually looks lik…
291	Bloomberg's claims on gun control fail to match the facts	anonymous-source/all_shooting_images_newest/10624.jpg	[{'emotion': 'Sadness', 'intensity': '4', 'reason': "It will aggravate people's anxiety about the proliferation of guns."}, {'emotion': 'Contentment', 'intensity': '3', 'reason': 'not sure'}, {'emotion': 'Anger', 'intensity': '3', 'reason': 'His claims did not match the facts.'}, {'emotion': 'Sadness', 'intensity': '2', 'reason': "Don't know what Trump‘s current position is"}, {'emotion': 'Sadnes…
292	Santa Fe High School Shooting Victim s Mother Confronts Ted Cruz at Town Hall: Don t Disrespect My Daughter	anonymous-source/all_shooting_images_newest/90369.jpg	[{'emotion': 'Sadness', 'intensity': '4', 'reason': 'I feel so sorry for the victims...'}, {'emotion': 'Sadness', 'intensity': '3', 'reason': 'it was sad'}, {'emotion': 'Sadness', 'intensity': '4', 'reason': "Her mother is pitiful. I can't imagine how does she feel."}, {'emotion': 'Contentment', 'intensity': '3', 'reason': "Don't understand the meaning of this news"}, {'emotion': 'Contentment', '…
294	Corporate America throws weight behind gun controls	anonymous-source/all_shooting_images_newest/10747.jpg	[{'emotion': 'Excitement', 'intensity': '3', 'reason': 'They should be.'}, {'emotion': 'Sadness', 'intensity': '3', 'reason': 'not sure how to feel'}, {'emotion': 'Contentment', 'intensity': '3', 'reason': 'I want to know what role does corporate play in gun control.'}, {'emotion': 'Excitement', 'intensity': '4', 'reason': 'Big investors have larger power as gun makers'}, {'emotion': 'Excitement'…
298	Burt Bacharach is supporting school gun violence survivors with new song 'Live to See Another Day'	anonymous-source/all_shooting_images_newest/90102.jpg	[{'emotion': 'Anger', 'intensity': '4', 'reason': "It will aggravate people's anxiety about the proliferation of guns."}, {'emotion': 'Contentment', 'intensity': '3', 'reason': 'not much to say'}, {'emotion': 'Awe', 'intensity': '3', 'reason': 'Happy for survivors.'}, {'emotion': 'Amusement', 'intensity': '4', 'reason': 'I feel grateful for video game makers to not extend the sadness even longer …
303	NYPD deploys officers to religious centers after Pittsburgh shooting	anonymous-source/all_shooting_images_newest/100420.jpg	[{'emotion': 'Sadness', 'intensity': '4', 'reason': "It will aggravate people's fear of gun violence."}, {'emotion': 'Sadness', 'intensity': '3', 'reason': 'It implies that shooting caused injuries.'}, {'emotion': 'Sadness', 'intensity': '4', 'reason': "It will aggravate people's fear of gun violence."}, {'emotion': 'Fear', 'intensity': '2', 'reason': 'different religious organizations feel under…
310	Pittsburgh synagogue shooting suspect threatened Jewish groups, pushed migrant caravan conspiracies	anonymous-source/all_shooting_images_newest/100147.jpg	[{'emotion': 'Sadness', 'intensity': '4', 'reason': "It will aggravate people's fear of gun violence."}, {'emotion': 'Anger', 'intensity': '2', 'reason': 'The hate crime cases are likely to be premeditated.'}, {'emotion': 'Sadness', 'intensity': '4', 'reason': "It will aggravate people's fear of gun violence."}, {'emotion': 'Fear', 'intensity': '1', 'reason': 'this person had previously made thre…
315	Everytown for Gun Safety launches $5 million ad campaign to flip 15 House districts.	anonymous-source/all_shooting_images_newest/90150.jpg	[{'emotion': 'Anger', 'intensity': '3', 'reason': "It will aggravate people's fear of gun violence."}, {'emotion': 'Excitement', 'intensity': '4', 'reason': 'Gun safety may be a key factor to reduce crimes.'}, {'emotion': 'Anger', 'intensity': '3', 'reason': "It will aggravate people's fear of gun violence."}, {'emotion': 'Excitement', 'intensity': '2', 'reason': 'a political group is trying to e…
323	Officials across the country fear a new era of untraceable firearms	anonymous-source/all_shooting_images_newest/21.jpg	[{'emotion': 'Fear', 'intensity': '3', 'reason': 'sounds dangerous '}, {'emotion': 'Disgust', 'intensity': '5', 'reason': 'its completely changable but no capitalism fucks all of us '}, {'emotion': 'Fear', 'intensity': '4', 'reason': 'The last thing we need is untraceable firearms when we are already struggling as-is. '}, {'emotion': 'Fear', 'intensity': '4', 'reason': 'That even government offic…
327	Alabama elementary school student brings gun to school, shoots himself in hand: police	anonymous-source/all_shooting_images_newest/90146.jpg	[{'emotion': 'Fear', 'intensity': '3', 'reason': 'sad story'}, {'emotion': 'Sadness', 'intensity': '4', 'reason': 'wow. guns really dont help do they, that poor child '}, {'emotion': 'Fear', 'intensity': '5', 'reason': 'How did this happen? Why was this able to happen? Alabama should be annexed. '}, {'emotion': 'Fear', 'intensity': '4', 'reason': 'It is a horror that elementary school children ca…
329	Central Michigan University officers had multiple run ins with shooting suspect	anonymous-source/all_shooting_images_newest/10646.jpg	[{'emotion': 'Fear', 'intensity': '3', 'reason': 'sad'}, {'emotion': 'Disgust', 'intensity': '4', 'reason': 'oh, why would that be?'}, {'emotion': 'Sadness', 'intensity': '3', 'reason': 'A missed opportunity to save lives by not being curious and asking questions, especially if it was a white person and they were racially profiled as being non-dangerous '}, {'emotion': 'Fear', 'intensity': '4', '…
330	Gaming community and friends mourn Jacksonville shooting victims	anonymous-source/all_shooting_images_newest/112.jpg	[{'emotion': 'Fear', 'intensity': '3', 'reason': 'violent video games can be dangerous '}, {'emotion': 'Awe', 'intensity': '3', 'reason': 'yea that makes sense and its sad and all but yea people die and people mourn them '}, {'emotion': 'Sadness', 'intensity': '3', 'reason': 'Sad to see another community in mourning '}, {'emotion': 'Sadness', 'intensity': '4', 'reason': 'I feel sorry for the vict…
337	Parkland survivor details her experience during shooting at Kavanaugh hearing	anonymous-source/all_shooting_images_newest/90149.jpg	[{'emotion': 'Sadness', 'intensity': '3', 'reason': 'painful memory for victim '}, {'emotion': 'Contentment', 'intensity': '5', 'reason': 'thats very brave of her and she shouldnt have to to make a point'}, {'emotion': 'Awe', 'intensity': '5', 'reason': 'That is a brave thing to do, gives me hope '}, {'emotion': 'Sadness', 'intensity': '4', 'reason': 'I feel sad for the victim.'}, {'emotion': 'Sa…
343	Florida lawmakers pass bill that would allow school staff to carry guns	anonymous-source/all_shooting_images_newest/10093.jpg	[{'emotion': 'Disgust', 'intensity': '5', 'reason': "It's more unsafe for them to carry weapons as they can use them when not necessary and the kids have an easy chance of getting it in their possession "}, {'emotion': 'Fear', 'intensity': '2', 'reason': 'i do not envision this ending well'}, {'emotion': 'Fear', 'intensity': '5', 'reason': 'imagine being in school and your teachers having guns'},…
344	California already had the strictest gun control laws in the nation. They just passed a bunch more	anonymous-source/all_shooting_images_newest/100027.jpg	[{'emotion': 'Contentment', 'intensity': '5', 'reason': 'I am completely on board with passing more laws to help save more lives'}, {'emotion': 'Excitement', 'intensity': '4', 'reason': 'change is happening'}, {'emotion': 'Excitement', 'intensity': '4', 'reason': 'California is making the right steps towards a safer society'}, {'emotion': 'Contentment', 'intensity': '3', 'reason': 'All the bad ne…
345	After A Call To Action From Student Emma Gonzalez, Florida Activists Take On Gun Laws	anonymous-source/all_shooting_images_newest/10369.jpg	[{'emotion': 'Contentment', 'intensity': '5', 'reason': "it's good to see people taking action"}, {'emotion': 'Excitement', 'intensity': '4', 'reason': 'change is occuring'}, {'emotion': 'Excitement', 'intensity': '4', 'reason': 'I believe there is hope for our society when I read things like this'}, {'emotion': 'Excitement', 'intensity': '3', 'reason': 'All the bad news about gun violence makes …
347	Threat of Shootings Turns School Security Into a Growth Industry	anonymous-source/all_shooting_images_newest/10766.jpg	[{'emotion': 'Sadness', 'intensity': '5', 'reason': "it's sad that school security had to wait to be advanced until school shootings became a normal thing"}, {'emotion': 'Fear', 'intensity': '4', 'reason': 'it took this to make a change'}, {'emotion': 'Anger', 'intensity': '4', 'reason': 'It is so maddening that these tragedies are turned into a business'}, {'emotion': 'Sadness', 'intensity': '3'…
349	Lawyers call US gun charges for Mexican man 'vindictive'	anonymous-source/all_shooting_images_newest/10207.jpg	[{'emotion': 'Sadness', 'intensity': '3', 'reason': "don't quite understand the headline."}, {'emotion': 'Sadness', 'intensity': '2', 'reason': 'this is a saddening situation that a gun related conviction is vindictive'}, {'emotion': 'Disgust', 'intensity': '4', 'reason': 'the way this headline is worded makes me feel weird and like they are focusing on the fact that this man is Mexican'}, {'emot…
350	Kendall residents concerned over proposed changes that would relax rules for outdoor shooting ranges	anonymous-source/all_shooting_images_newest/90259.jpg	[{'emotion': 'Fear', 'intensity': '3', 'reason': 'I feel this could lead to some more violence and "accidents" to occur'}, {'emotion': 'Fear', 'intensity': '4', 'reason': 'something is bound to happen if this occurs'}, {'emotion': 'Fear', 'intensity': '4', 'reason': 'Outdoor shooting ranges could hurt many people'}, {'emotion': 'Sadness', 'intensity': '3', 'reason': 'All the bad news about gun vi…
353	Nashville mayor demands stricter gun control after Waffle House shooting	anonymous-source/all_shooting_images_newest/10122.jpg	[{'emotion': 'Contentment', 'intensity': '4', 'reason': "it's good to see more strict gun control coming into place"}, {'emotion': 'Excitement', 'intensity': '4', 'reason': 'change is happening but it took this to make change'}, {'emotion': 'Contentment', 'intensity': '4', 'reason': 'stricter gun control laws are better'}, {'emotion': 'Contentment', 'intensity': '3', 'reason': 'All the bad news a…
354	Illinois superintendent becomes police officer so she can carry a gun in her school	anonymous-source/all_shooting_images_newest/100035.jpg	[{'emotion': 'Disgust', 'intensity': '5', 'reason': 'doing this is pointless and instead of possibly causing more harm, she should advocate for better security.'}, {'emotion': 'Sadness', 'intensity': '4', 'reason': 'she feels she has to do this to protect herself and her students'}, {'emotion': 'Fear', 'intensity': '4', 'reason': 'teachers having to carry guns in school shows how scary these time…
357	Poll: most US teens are worried that a shooting could happen at their school	anonymous-source/all_shooting_images_newest/10820.jpg	[{'emotion': 'Sadness', 'intensity': '5', 'reason': 'children should not have to be scared just going to school or even leaving their house. '}, {'emotion': 'Sadness', 'intensity': '4', 'reason': 'this shouldnt be true'}, {'emotion': 'Sadness', 'intensity': '5', 'reason': 'As a teenager, it is so sad that kids this young have to be worried about that'}, {'emotion': 'Amusement', 'intensity': '3', …
360	Trump's 'Angel Families' weaponize their grief to demonize immigrants	anonymous-source/all_shooting_images_newest/10009.jpg	[{'emotion': 'Anger', 'intensity': '5', 'reason': 'that is so wrong, it is wrong to use such a vulnerable emotion to tear down a whole group of people'}, {'emotion': 'Anger', 'intensity': '2', 'reason': 'I tend to not have much emotion for this because I am extremely insensitive to politics and immigration issues.'}, {'emotion': 'Awe', 'intensity': '3', 'reason': 'What does this mean\r\n'}, {'emo…
364	U.S. online gaming community stunned by Jacksonville shooting	anonymous-source/all_shooting_images_newest/16.jpg	[{'emotion': 'Anger', 'intensity': '1', 'reason': "i'm not sure why they're confused or stunned when they see gun violence in video games all the time and that could correlate with behaviors like that in the real world. I also don't know much about the research behind it"}, {'emotion': 'Sadness', 'intensity': '1', 'reason': "I'm not interested in this kind of news."}, {'emotion': 'Awe', 'intensit…
372	On Day Of Mass Shooting, Trump Jokes He Nearly Canceled Speech Due To 'Bad Hair Day'	anonymous-source/all_shooting_images_newest/100217.jpg	[{'emotion': 'Amusement', 'intensity': '3', 'reason': "it's kind of funny, but i do see why people are upset. it is a bit insensitive"}, {'emotion': 'Anger', 'intensity': '5', 'reason': 'This should be a serious day.'}, {'emotion': 'Awe', 'intensity': '3', 'reason': 'This is stupid news'}, {'emotion': 'Disgust', 'intensity': '4', 'reason': 'he is just so horrible.'}, {'emotion': 'Disgust', 'inten…
373	11 more states join lawsuit on 3D printed guns	anonymous-source/all_shooting_images_newest/252.jpg	[{'emotion': 'Contentment', 'intensity': '3', 'reason': "I'm glad states are stepping up to the problem and standing together"}, {'emotion': 'Contentment', 'intensity': '3', 'reason': 'Good to know this news.'}, {'emotion': 'Fear', 'intensity': '3', 'reason': 'Ban 3D printers is next'}, {'emotion': 'Excitement', 'intensity': '3', 'reason': 'guns should not be able to be 3D printed.'}, {'emotion':…
374	Jacksonville Witness: Gamer Gunman Stared Blankly After Loss	anonymous-source/all_shooting_images_newest/42.jpg	[{'emotion': 'Fear', 'intensity': '4', 'reason': 'the gunman seems like a psychopath and im afraid of the mental issues people like this face since it can have real consequences in harming others'}, {'emotion': 'Sadness', 'intensity': '1', 'reason': 'Not interested.'}, {'emotion': 'Awe', 'intensity': '3', 'reason': 'That was sarcasm. Just touch grass, COD isnt making kids shoot up schools.'}, {'e…
376	Maryland drugstore shooter was diagnosed with mental illness but legally owned gun, sheriff says	anonymous-source/all_shooting_images_newest/90330.jpg	[{'emotion': 'Disgust', 'intensity': '5', 'reason': "I'm at disgusted at why there aren't more thorough background checks"}, {'emotion': 'Sadness', 'intensity': '5', 'reason': 'The victim is innocent.'}, {'emotion': 'Contentment', 'intensity': '3', 'reason': 'These things happen unfortunately '}, {'emotion': 'Sadness', 'intensity': '3', 'reason': 'how was he legally allowed to own a gun?'}, {'emo…
380	More than a year after 9-year-old girl fatally shot during gun safety lesson, her father's case continues	anonymous-source/all_shooting_images_newest/90348.jpg	[{'emotion': 'Sadness', 'intensity': '3', 'reason': 'It is a sad story that the gun control still need to be improved'}, {'emotion': 'Sadness', 'intensity': '3', 'reason': 'It is a sad story that the gun control still need to be improved'}, {'emotion': 'Sadness', 'intensity': '4', 'reason': 'She was so young '}, {'emotion': 'Sadness', 'intensity': '4', 'reason': 'it is saddening to hear about a l…
384	Gun owners support a wide range of gun control measures, Johns Hopkins study finds	anonymous-source/all_shooting_images_newest/10434.jpg	[{'emotion': 'Contentment', 'intensity': '3', 'reason': 'Want to know why that'}, {'emotion': 'Contentment', 'intensity': '3', 'reason': 'What to know why that'}, {'emotion': 'Fear', 'intensity': '3', 'reason': 'what does that mean '}, {'emotion': 'Excitement', 'intensity': '3', 'reason': 'Gun owners being on board with control is an important step to create change'}, {'emotion': 'Anger', 'intens…
388	Sacha Baron Cohen Tricks A Pro-Gun Activist Into Putting A Dildo In His Mouth	anonymous-source/all_shooting_images_newest/317.jpg	[{'emotion': 'Anger', 'intensity': '2', 'reason': 'Disgusting to hear these kinds of news'}, {'emotion': 'Anger', 'intensity': '2', 'reason': 'Disgusting to hear these kinds of news'}, {'emotion': 'Amusement', 'intensity': '4', 'reason': 'that is a funny headline '}, {'emotion': 'Amusement', 'intensity': '5', 'reason': 'this would be a hilarious joke and reaction to see'}, {'emotion': 'Amusement'…
390	I Placed Myself Under His Lifeless Body': Parkland Survivor Details School Shooting Experience At Kavanaugh Hearing	anonymous-source/all_shooting_images_newest/90353.jpg	[{'emotion': 'Sadness', 'intensity': '4', 'reason': 'Willing to hear about the victim tell about the story and I can imagine the tragic situation'}, {'emotion': 'Sadness', 'intensity': '4', 'reason': 'willing to hear about the victim tell about the story and I can imagine the tragic situation'}, {'emotion': 'Sadness', 'intensity': '4', 'reason': 'It is so sad to hear these stories about what peop…
393	Hate crime charges filed in Pittsburgh synagogue shooting that left 11 dead	anonymous-source/all_shooting_images_newest/100245.jpg	[{'emotion': 'Fear', 'intensity': '4', 'reason': 'There are 11 people dead because of this hate crime'}, {'emotion': 'Fear', 'intensity': '4', 'reason': 'There are 11 people dead because of this hate crime'}, {'emotion': 'Contentment', 'intensity': '4', 'reason': 'there should be more than just hate crime charges but that is a start '}, {'emotion': 'Sadness', 'intensity': '4', 'reason': 'I am sad…
396	This is my highway': Doctors challenge NRA after Chicago hospital shooting	anonymous-source/all_shooting_images_newest/110306.jpg	[{'emotion': 'Awe', 'intensity': '3', 'reason': 'Doctors want to save lives but NRA causing people death'}, {'emotion': 'Awe', 'intensity': '3', 'reason': 'Doctors want to save lives but NRA causing people death'}, {'emotion': 'Excitement', 'intensity': '4', 'reason': 'the NRA is being challenged'}, {'emotion': 'Anger', 'intensity': '3', 'reason': 'it seems insensitive of the NRA to fight against…
420	Betsy DeVos: School safety commission won't focus on guns	anonymous-source/all_shooting_images_newest/10202.jpg	[{'emotion': 'Anger', 'intensity': '3', 'reason': 'Gun safety is one of the most critical parts of school safety protocols, but the commission ignores it purposefully.'}, {'emotion': 'Contentment', 'intensity': '4', 'reason': 'At least this asshole can make one reasonable statement '}, {'emotion': 'Disgust', 'intensity': '4', 'reason': 'of course they wont'}, {'emotion': 'Anger', 'intensity': '3'…
422	South Dakotans may soon be able to carry concealed handguns without a permit	anonymous-source/all_shooting_images_newest/110208.jpg	[{'emotion': 'Fear', 'intensity': '3', 'reason': 'it might cause unnecessary harm.'}, {'emotion': 'Fear', 'intensity': '4', 'reason': 'We are moving in the wrong direction. No permits?? What the hell. '}, {'emotion': 'Disgust', 'intensity': '4', 'reason': 'yep i live in montana and its sad because life literally doesnt matter to these people'}, {'emotion': 'Disgust', 'intensity': '5', 'reason': '…
426	Inoperable handgun found at Waukegan alternative school	anonymous-source/all_shooting_images_newest/10029.jpg	[{'emotion': 'Anger', 'intensity': '3', 'reason': 'Even though the gun is inoperable but it could still be dangerous to children at school.'}, {'emotion': 'Fear', 'intensity': '4', 'reason': 'It feels too close to home and in our schools '}, {'emotion': 'Disgust', 'intensity': '5', 'reason': 'nice, great'}, {'emotion': 'Sadness', 'intensity': '1', 'reason': "It's sad that there is a gun at a scho…
428	Comedian says taking away guns is not the solution to prevent shooting	anonymous-source/all_shooting_images_newest/110429.jpg	[{'emotion': 'Sadness', 'intensity': '3', 'reason': 'taking away guns might not be the solution to gun violence, but at least it can prevent the majority of gun crime from happening in the first place.'}, {'emotion': 'Disgust', 'intensity': '3', 'reason': 'What does this persons opinion have to do with anything? '}, {'emotion': 'Disgust', 'intensity': '5', 'reason': 'literally how?'}, {'emotion':…
429	Shopify bans sale of certain firearms, accessories	anonymous-source/all_shooting_images_newest/166.jpg	[{'emotion': 'Contentment', 'intensity': '3', 'reason': 'there is actual action being implemented for gun control.'}, {'emotion': 'Contentment', 'intensity': '3', 'reason': 'I agree with this decision '}, {'emotion': 'Contentment', 'intensity': '5', 'reason': 'i mean good its a start'}, {'emotion': 'Excitement', 'intensity': '3', 'reason': 'This is saying that change is being made and that compan…
430	Trump praises gun rights, bashes Mueller probe in speech to NRA	anonymous-source/all_shooting_images_newest/10203.jpg	[{'emotion': 'Disgust', 'intensity': '3', 'reason': "Trump's pro-gun attitude will result in more shooting incidents."}, {'emotion': 'Disgust', 'intensity': '4', 'reason': "Shut up, Donald. You're an idiot and don't know anything. You're a pundit for your followers with all talk and no action. "}, {'emotion': 'Disgust', 'intensity': '5', 'reason': 'yep thats trump'}, {'emotion': 'Anger', 'intensi…
432	Liberals spend $86 million to tackle gang and gun violence	anonymous-source/all_shooting_images_newest/110290.jpg	[{'emotion': 'Contentment', 'intensity': '3', 'reason': 'It shows actual actions on stopping gun violence.'}, {'emotion': 'Contentment', 'intensity': '4', 'reason': 'I agree with this decision '}, {'emotion': 'Contentment', 'intensity': '5', 'reason': 'good but also focus on a better system'}, {'emotion': 'Contentment', 'intensity': '2', 'reason': 'I like that people are spending money on tacklin…
433	What is gun control? Everything you need to know	anonymous-source/all_shooting_images_newest/10005.jpg	[{'emotion': 'Contentment', 'intensity': '3', 'reason': 'people should know more about gun control in America.'}, {'emotion': 'Excitement', 'intensity': '3', 'reason': 'I would read on '}, {'emotion': 'Contentment', 'intensity': '5', 'reason': 'education is good'}, {'emotion': 'Contentment', 'intensity': '1', 'reason': 'I would read this to learn more about gun control. This would be an informati…
434	Advice from a survivor of the Florida school shooting: It's time to start ignoring Trump	anonymous-source/all_shooting_images_newest/10224.jpg	[{'emotion': 'Excitement', 'intensity': '3', 'reason': 'By ignoring ignorant and wrong gun policy, the country might have done better with the issue.'}, {'emotion': 'Contentment', 'intensity': '3', 'reason': 'I agree with this statement and would like to know why they think this as well '}, {'emotion': 'Contentment', 'intensity': '5', 'reason': 'true he is useless and no longer the president'}, {…
437	Transcript: Americans affected by gun violence on 'Face the Nation,' Feb. 25, 2018	anonymous-source/all_shooting_images_newest/10520.jpg	[{'emotion': 'Anger', 'intensity': '3', 'reason': 'Any gun violence and crime is the result of ignoring the issue. '}, {'emotion': 'Contentment', 'intensity': '3', 'reason': 'I would possibly tune in '}, {'emotion': 'Contentment', 'intensity': '3', 'reason': 'ok good education is good'}, {'emotion': 'Sadness', 'intensity': '3', 'reason': 'This had to due with the Parkland shooting which was a ter…
438	Michigan University Profs To Fight Off School Shooters With -- Hockey Pucks?	anonymous-source/all_shooting_images_newest/110432.jpg	[{'emotion': 'Amusement', 'intensity': '3', 'reason': 'Is fighting off gun violence could only be done with guns? '}, {'emotion': 'Amusement', 'intensity': '4', 'reason': 'What has the world come to? '}, {'emotion': 'Disgust', 'intensity': '5', 'reason': 'excuse me what?'}, {'emotion': 'Fear', 'intensity': '3', 'reason': 'I\'m very scared because there isn\'t many measures for schools to fight of…
445	A month before deadly school shooting, Texas students protested gun violence	anonymous-source/all_shooting_images_newest/10379.jpg	[{'emotion': 'Fear', 'intensity': '3', 'reason': "It will aggravate people's fear of gun violence."}, {'emotion': 'Anger', 'intensity': '3', 'reason': "So people in power don't care about people's safety"}, {'emotion': 'Sadness', 'intensity': '2', 'reason': 'Feel sad how these two things happen together so closely, but so ironic.'}, {'emotion': 'Amusement', 'intensity': '4', 'reason': 'I find it …
446	8 men, 3 women killed in Pittsburgh synagogue shooting mourned	anonymous-source/all_shooting_images_newest/100333.jpg	[{'emotion': 'Fear', 'intensity': '4', 'reason': "It will aggravate people's fear of gun violence."}, {'emotion': 'Sadness', 'intensity': '3', 'reason': "I'm sorry for the tragedy"}, {'emotion': 'Sadness', 'intensity': '2', 'reason': 'people were killed'}, {'emotion': 'Disgust', 'intensity': '5', 'reason': 'Why are people targeting religious places to shoot?'}, {'emotion': 'Sadness', 'intensity':…
458	Advocates see opening for tougher gun control laws for those guilty of domestic violence	anonymous-source/all_shooting_images_newest/10716.jpg	[{'emotion': 'Sadness', 'intensity': '3', 'reason': "It will aggravate people's fear of gun violence."}, {'emotion': 'Contentment', 'intensity': '3', 'reason': 'Do something realistic'}, {'emotion': 'Excitement', 'intensity': '3', 'reason': 'very reasonable!'}, {'emotion': 'Contentment', 'intensity': '3', 'reason': 'I am not sure what this is trying to say. Are there stricter laws to protect thos…
459	Federal judge blocks release of blueprints for 3-D-printed guns	anonymous-source/all_shooting_images_newest/273.jpg	[{'emotion': 'Awe', 'intensity': '4', 'reason': 'It will protect people from the proliferation of guns.\r\n'}, {'emotion': 'Contentment', 'intensity': '3', 'reason': 'I think 3-D-printed guns may lead to more shootings.'}, {'emotion': 'Disgust', 'intensity': '2', 'reason': 'annoyed with our society that a 3D gun is something someone wants'}, {'emotion': 'Contentment', 'intensity': '3', 'reason': …
462	Liberal Pittsburgh mayor calls for gun control, rejects Trump s call for more armed guards	anonymous-source/all_shooting_images_newest/100394.jpg	[{'emotion': 'Awe', 'intensity': '3', 'reason': 'It will protect people from the proliferation of guns.'}, {'emotion': 'Contentment', 'intensity': '4', 'reason': 'I agree with gun control.'}, {'emotion': 'Excitement', 'intensity': '4', 'reason': 'that something positive is being done'}, {'emotion': 'Contentment', 'intensity': '2', 'reason': 'This is that mayors right, especially given he is an el…
465	Florida school shooter heard voices telling him to kill	anonymous-source/all_shooting_images_newest/204.jpg	[{'emotion': 'Fear', 'intensity': '4', 'reason': 'It will aggravate people’s problems with the proliferation of guns.'}, {'emotion': 'Fear', 'intensity': '4', 'reason': 'The shooter is a lunatic.'}, {'emotion': 'Disgust', 'intensity': '4', 'reason': 'that this is how this story is framed. '}, {'emotion': 'Fear', 'intensity': '3', 'reason': 'it is scary that mentally ill people can get their hands…
467	Cardi B Thinks Black Excellence Scares Trump's America, Especially 'Scrawny' Men 'Raised in a Trailer in Alabama': 'That's Why They Own Guns'	anonymous-source/all_shooting_images_newest/10303.jpg	[{'emotion': 'Fear', 'intensity': '4', 'reason': 'It will aggravate people’s problems with the proliferation of guns.'}, {'emotion': 'Fear', 'intensity': '3', 'reason': 'Those people who own guns are dangerous.'}, {'emotion': 'Amusement', 'intensity': '2', 'reason': 'okay, first of all, so out of context but knowing a little about who Cardi is as a person makes this very funny. I think a lot of s…
471	Rubio: Gun laws wouldn't have prevented Parkland	anonymous-source/all_shooting_images_newest/10894.jpg	[{'emotion': 'Fear', 'intensity': '3', 'reason': 'It will aggravate people’s problems with the proliferation of guns.'}, {'emotion': 'Anger', 'intensity': '3', 'reason': 'I think gun laws are necessary.'}, {'emotion': 'Anger', 'intensity': '1', 'reason': 'im annoyed at this dumb man for having dumb thoughts. '}, {'emotion': 'Sadness', 'intensity': '1', 'reason': "I don't agree with this stance an…
472	Brett Kavanaugh: How could Trump's new Supreme Court justice shape battles over abortion rights, gun control, and impeachment	anonymous-source/all_shooting_images_newest/100397.jpg	[{'emotion': 'Disgust', 'intensity': '3', 'reason': 'It will aggravate people’s problems with the proliferation of guns.'}, {'emotion': 'Contentment', 'intensity': '3', 'reason': "I want to know how could Trump's new Supreme Court justice shape battles over abortion rights, gun control, and impeachment.\r\n"}, {'emotion': 'Fear', 'intensity': '4', 'reason': "i'm really so scared were going to mak…
473	Planned shift on gun exports kicks up storm	anonymous-source/all_shooting_images_newest/10131.jpg	[{'emotion': 'Fear', 'intensity': '4', 'reason': 'It will aggravate people’s problems with the proliferation of guns.'}, {'emotion': 'Fear', 'intensity': '2', 'reason': "I don't know what the storm is."}, {'emotion': 'Fear', 'intensity': '2', 'reason': "this is just going to make me more nervous and think that people around me have guns on them (which they probably do cause America but I don't wa…
474	Pennsylvania High School Punishes More Than 200 Students for Participating in National Walkout Against Gun Violence	anonymous-source/all_shooting_images_newest/10078.jpg	[{'emotion': 'Awe', 'intensity': '4', 'reason': 'It will protect people from the proliferation of guns.'}, {'emotion': 'Anger', 'intensity': '4', 'reason': 'I am against gun violence as well.'}, {'emotion': 'Anger', 'intensity': '1', 'reason': 'that the story is framed in this way. but also annoyed with solutions to the outcome like a walk out instead of solutions to the problem like gun control.…
475	Shooting suspect was able to buy guns despite mental illness	anonymous-source/all_shooting_images_newest/322.jpg	[{'emotion': 'Fear', 'intensity': '4', 'reason': 'It will aggravate people’s problems with the proliferation of guns.'}, {'emotion': 'Disgust', 'intensity': '5', 'reason': 'It is insane. I think people with mental illness should not be allowed to buy guns.'}, {'emotion': 'Fear', 'intensity': '1', 'reason': "that they're painting mental illness is such a negative light. but i understand the intend…
476	Experts share ways you can keep yourself safe in a mass shooting	anonymous-source/all_shooting_images_newest/110359.jpg	[{'emotion': 'Sadness', 'intensity': '5', 'reason': 'It will aggravate people’s problems with the proliferation of guns.'}, {'emotion': 'Excitement', 'intensity': '3', 'reason': 'I want to know how to keep myself safe in a mass shooting.\r\n'}, {'emotion': 'Awe', 'intensity': '5', 'reason': 'since this is apparently life now. teach me how to keep living.'}, {'emotion': 'Amusement', 'intensity': '…
477	Father who lost child in Parkland massacre: Survivors' gun control efforts go 'in the wrong direction'	anonymous-source/all_shooting_images_newest/10311.jpg	[{'emotion': 'Sadness', 'intensity': '5', 'reason': 'It will aggravate people’s problems with the proliferation of guns.'}, {'emotion': 'Fear', 'intensity': '3', 'reason': 'I want to know why does he say that.'}, {'emotion': 'Fear', 'intensity': '1', 'reason': "I feel bad for the father losing a child takes a horrible toll on the parent. but what do you mean wrong direction. I don't care enough t…
479	What do most mass shooters have in common? It's not politics, violent video games or occult beliefs	anonymous-source/all_shooting_images_newest/10657.jpg	[{'emotion': 'Fear', 'intensity': '1', 'reason': 'I do not have a strong emotion about this'}, {'emotion': 'Fear', 'intensity': '2', 'reason': 'it is frightening to learn that there is something causing these people to do mass shootings'}, {'emotion': 'Fear', 'intensity': '2', 'reason': 'I want to know what they have in common. Is it related to biology?'}, {'emotion': 'Disgust', 'intensity': '3',…
482	White House slams Justice over 3D-printed guns Video	anonymous-source/all_shooting_images_newest/431.jpg	[{'emotion': 'Contentment', 'intensity': '1', 'reason': 'need more context for an opinion'}, {'emotion': 'Contentment', 'intensity': '2', 'reason': 'it seems like the White House is taking the necessary actions to prevent these guns blueprints from coming out'}, {'emotion': 'Contentment', 'intensity': '4', 'reason': '3D-printed guns Video may lead to gun violence '}, {'emotion': 'Contentment', 'i…
484	Doctors share gun stories, demand action after NRA tells them to 'stay in their lane'	anonymous-source/all_shooting_images_newest/110102.jpg	[{'emotion': 'Awe', 'intensity': '3', 'reason': 'glad someone is standing up to NRA'}, {'emotion': 'Sadness', 'intensity': '4', 'reason': 'this is an extremely obnoxious and insensitive response from the NRA'}, {'emotion': 'Anger', 'intensity': '4', 'reason': 'Doctors should be allowed to say what they see. Their perspectives are unique and helpful.'}, {'emotion': 'Awe', 'intensity': '3', 'reason…
486	Thousands Attended The First Funerals For The Victims Of The Pittsburgh Synagogue Shooting	anonymous-source/all_shooting_images_newest/100417.jpg	[{'emotion': 'Sadness', 'intensity': '3', 'reason': "shouldn't have to be happening today we should have better gun control"}, {'emotion': 'Sadness', 'intensity': '4', 'reason': 'hearing about the loss of lives and imagining the families that are suffering is painful'}, {'emotion': 'Sadness', 'intensity': '4', 'reason': 'They could have survived. '}, {'emotion': 'Sadness', 'intensity': '3', 'reas…
487	School shootings: How parents can cope with their own fears and anxieties	anonymous-source/all_shooting_images_newest/90267.jpg	[{'emotion': 'Anger', 'intensity': '2', 'reason': "maybe it shouldn't be annoying but why are we dealing with emotions instead of actual solutions"}, {'emotion': 'Sadness', 'intensity': '4', 'reason': "this should not be something that parents are taught to cope with, it shouldn't be an issue in the first place"}, {'emotion': 'Sadness', 'intensity': '3', 'reason': 'These parents are worried about…
488	Broward County, Florida, newspaper pulls all gun ads following front-page controversy	anonymous-source/all_shooting_images_newest/10837.jpg	[{'emotion': 'Contentment', 'intensity': '1', 'reason': 'i dont have a strong emotion '}, {'emotion': 'Contentment', 'intensity': '1', 'reason': "this doesn't make me feel much of anything "}, {'emotion': 'Contentment', 'intensity': '4', 'reason': 'gun ads should not be on the front page'}, {'emotion': 'Contentment', 'intensity': '3', 'reason': 'The ad should be pulled '}, {'emotion': 'Contentmen…
490	School shootings: Should parents be charged for failing to lock up guns used by their kids?	anonymous-source/all_shooting_images_newest/501.jpg	[{'emotion': 'Contentment', 'intensity': '2', 'reason': 'depends on the circumstances idk'}, {'emotion': 'Anger', 'intensity': '4', 'reason': 'it is angering to hear about negligence on behalf of the parents that leads to tragedy'}, {'emotion': 'Excitement', 'intensity': '3', 'reason': "I want to see others' opinions about the issue. It feels like a debate."}, {'emotion': 'Awe', 'intensity': '3',…
491	Will Paul Ryan, Mitch McConnell embrace Trump's gun reforms?	anonymous-source/all_shooting_images_newest/10364.jpg	[{'emotion': 'Disgust', 'intensity': '3', 'reason': 'rich white male politicians and the issue of gun rights are a pretty disgusting combination'}, {'emotion': 'Sadness', 'intensity': '1', 'reason': 'I want to know the answer to the question'}, {'emotion': 'Fear', 'intensity': '3', 'reason': "I want to see others' analysis of the issue."}, {'emotion': 'Amusement', 'intensity': '3', 'reason': 'it …
494	Why We Need to Take Away All the Guns	anonymous-source/all_shooting_images_newest/110131.jpg	[{'emotion': 'Contentment', 'intensity': '3', 'reason': 'good that there is more coverage'}, {'emotion': 'Contentment', 'intensity': '1', 'reason': 'I can see why people feel this way given the threat of mass shootings'}, {'emotion': 'Contentment', 'intensity': '3', 'reason': 'I think all guns should be taken away.'}, {'emotion': 'Contentment', 'intensity': '3', 'reason': 'the article explains wh…
496	Las Vegas marks 1-year shooting anniversary Video	anonymous-source/all_shooting_images_newest/100418.jpg	[{'emotion': 'Sadness', 'intensity': '3', 'reason': 'it is a sad situation'}, {'emotion': 'Sadness', 'intensity': '4', 'reason': 'the video is terrifying to watch and saddening to see lives being lost'}, {'emotion': 'Contentment', 'intensity': '3', 'reason': 'The video can remind people of what happened.'}, {'emotion': 'Anger', 'intensity': '3', 'reason': 'that was such a horrific day and we have…
497	Teaching in the Age of School Shootings	anonymous-source/all_shooting_images_newest/90342.jpg	[{'emotion': 'Sadness', 'intensity': '3', 'reason': 'I remember when we were doing a shooting drill and my hs teacher told us she had a kid at home and if something happened he would be alone'}, {'emotion': 'Sadness', 'intensity': '3', 'reason': 'school shootings detracts from the purpose of school as a safe space away from the home to learn and grow our youth'}, {'emotion': 'Sadness', 'intensity…
502	Trump: Shooting had little to do with gun laws	anonymous-source/all_shooting_images_newest/100482.jpg	[{'emotion': 'Disgust', 'intensity': '5', 'reason': 'shootings have everything to do with gun laws and if you think differently you should not be in power'}, {'emotion': 'Excitement', 'intensity': '3', 'reason': 'have no idea what gun laws are'}, {'emotion': 'Anger', 'intensity': '4', 'reason': 'that makes no sense'}, {'emotion': 'Anger', 'intensity': '4', 'reason': 'shootings has everything to d…
503	Vista, Maker of Ammunition and Recreation Gear, Plans to Sell Off Gun-Making Unit	anonymous-source/all_shooting_images_newest/10480.jpg	[{'emotion': 'Contentment', 'intensity': '3', 'reason': 'hopefully that means they will no longer be making them '}, {'emotion': 'Fear', 'intensity': '3', 'reason': 'maybe there would be a lack of control'}, {'emotion': 'Fear', 'intensity': '4', 'reason': 'who are they selling it to '}, {'emotion': 'Sadness', 'intensity': '3', 'reason': "I don't love seeing people using guns for capitalistic reas…
505	Memorial Service, 5K Among Events Marking Las Vegas Shooting	anonymous-source/all_shooting_images_newest/90420.jpg	[{'emotion': 'Anger', 'intensity': '4', 'reason': "there shouldn't need to be a memorial service. If gun laws were stricter those people would still be with us and the memorial wouldn't have to exist"}, {'emotion': 'Sadness', 'intensity': '3', 'reason': 'so many people died from gun shots '}, {'emotion': 'Sadness', 'intensity': '4', 'reason': 'it is so sad so many lives were lost '}, {'emotion': …
506	Gun control legislation remains stalled in Congress	anonymous-source/all_shooting_images_newest/10800.jpg	[{'emotion': 'Anger', 'intensity': '5', 'reason': "it shouldn't be such a large discussion. People die left and right and tragedies happen far too often. Ban guns or at least make large restrictions. It's not that hard. "}, {'emotion': 'Sadness', 'intensity': '3', 'reason': 'no efficient laws can protect people from gunshots '}, {'emotion': 'Anger', 'intensity': '4', 'reason': 'it is frustrating …
508	Gun control advocate wins upset in Ga. House race	anonymous-source/all_shooting_images_newest/110295.jpg	[{'emotion': 'Excitement', 'intensity': '3', 'reason': "gun control is needed and always good so it's great that someone won part of the battle"}, {'emotion': 'Excitement', 'intensity': '1', 'reason': 'the gun problem is under control little by little'}, {'emotion': 'Excitement', 'intensity': '4', 'reason': 'it could be a step forward '}, {'emotion': 'Excitement', 'intensity': '3', 'reason': "it'…
512	Trump Still Stands By Arming People Following Pittsburgh Synagogue Shooting	anonymous-source/all_shooting_images_newest/100491.jpg	[{'emotion': 'Disgust', 'intensity': '4', 'reason': "How can you defend guns after a tragedy like that it's beyond inappropriate and says a lot about him as a person and the protection of guns vs protection of people and religion"}, {'emotion': 'Anger', 'intensity': '3', 'reason': "obviously gun problem influence people's life "}, {'emotion': 'Anger', 'intensity': '4', 'reason': 'how can you even…
513	Assault weapons ban moves forward in Deerfield, April vote likely	anonymous-source/all_shooting_images_newest/10482.jpg	[{'emotion': 'Excitement', 'intensity': '4', 'reason': "assault weapons should be banned and it's amazing that somewhere could be one step closer to that"}, {'emotion': 'Excitement', 'intensity': '3', 'reason': 'gun problems may have a chance to improve '}, {'emotion': 'Excitement', 'intensity': '4', 'reason': 'it could be a step forward '}, {'emotion': 'Excitement', 'intensity': '3', 'reason': '…
522	Health Care, Gun Control And The Environment Will Rule The Florida Governor Race	anonymous-source/all_shooting_images_newest/481.jpg	[{'emotion': 'Contentment', 'intensity': '4', 'reason': "These three jobs are so relevant to people's lives that it would be a pleasure for the governor to do them well"}, {'emotion': 'Fear', 'intensity': '3', 'reason': 'I fear the administration of gun control '}, {'emotion': 'Contentment', 'intensity': '2', 'reason': 'I can appreciate these issues being represented in politics'}, {'emotion': 'C…
524	Dick's predicts lower sales, foot traffic after gun policy changes	anonymous-source/all_shooting_images_newest/10126.jpg	[{'emotion': 'Contentment', 'intensity': '4', 'reason': 'No sale, no kill'}, {'emotion': 'Fear', 'intensity': '3', 'reason': 'afraid of guns '}, {'emotion': 'Contentment', 'intensity': '2', 'reason': "I don't really have strong emotions on this, wish gun restrictions were more popular"}, {'emotion': 'Contentment', 'intensity': '1', 'reason': 'this is a statement of facts that does not directly af…
526	Pittsburgh Synagogue Shooting Spurs Outpouring of Grief	anonymous-source/all_shooting_images_newest/100446.jpg	[{'emotion': 'Fear', 'intensity': '4', 'reason': 'I am worried that a shooting might happen near me.'}, {'emotion': 'Sadness', 'intensity': '3', 'reason': 'fear the guns '}, {'emotion': 'Sadness', 'intensity': '3', 'reason': "I wish there wasn't anything to feel grief over"}, {'emotion': 'Sadness', 'intensity': '3', 'reason': 'lives were lost, and people were targeted based on their religious bel…
528	Bandmates remember friend killed in series of 'cold-blooded' Nashville shootings	anonymous-source/all_shooting_images_newest/3.jpg	[{'emotion': 'Sadness', 'intensity': '3', 'reason': 'Because of the death of innocent people'}, {'emotion': 'Sadness', 'intensity': '3', 'reason': 'sad about the story '}, {'emotion': 'Sadness', 'intensity': '3', 'reason': 'It is sad that happened'}, {'emotion': 'Sadness', 'intensity': '4', 'reason': 'people are talking about a loved one that they lost'}, {'emotion': 'Anger', 'intensity': '4', 'r…
534	Hospitals Are Trying To Do What Politicians Haven't: Stop Gun Violence	anonymous-source/all_shooting_images_newest/110254.jpg	[{'emotion': 'Anger', 'intensity': '3', 'reason': 'Why should the government leave things to the hospitals? This shows there is a corrupt government and I am angry about it'}, {'emotion': 'Excitement', 'intensity': '4', 'reason': 'good progress '}, {'emotion': 'Excitement', 'intensity': '3', 'reason': 'I appreciate someone doing something to create change'}, {'emotion': 'Sadness', 'intensity': '3…
538	Gun control group targets firearms owners with new ads, seeks common ground	anonymous-source/all_shooting_images_newest/32.jpg	[{'emotion': 'Contentment', 'intensity': '4', 'reason': 'It appears that illegal gun ownership can be limited'}, {'emotion': 'Contentment', 'intensity': '3', 'reason': 'some progress '}, {'emotion': 'Contentment', 'intensity': '2', 'reason': 'I can appreciate trying to change things'}, {'emotion': 'Contentment', 'intensity': '2', 'reason': 'there is an attempt to find common ground and create las…
539	Judge blocks Texas company from putting plans to make 3D guns online	anonymous-source/all_shooting_images_newest/364.jpg	[{'emotion': 'Excitement', 'intensity': '3', 'reason': 'they finally reached a decision that was in the best interest and safety of everyone'}, {'emotion': 'Contentment', 'intensity': '1', 'reason': 'one did I already read this two yea good idea'}, {'emotion': 'Contentment', 'intensity': '3', 'reason': "I'm glad something was done"}, {'emotion': 'Fear', 'intensity': '3', 'reason': '.'}, {'emotion…
540	Trump woos NRA gun lobby in Dallas	anonymous-source/all_shooting_images_newest/10118.jpg	[{'emotion': 'Fear', 'intensity': '3', 'reason': 'why is he trying to appease them, when he should be doing the opposite. '}, {'emotion': 'Amusement', 'intensity': '1', 'reason': 'woo is a fun word also imagining trump wooing is funny but fuck gun lobbyists '}, {'emotion': 'Anger', 'intensity': '3', 'reason': 'frustrated but unsurprise by information'}, {'emotion': 'Disgust', 'intensity': '3', 'r…
542	Pittsburgh Mayor Bill Peduto addresses Trump s comments on synagogue shooting	anonymous-source/all_shooting_images_newest/100454.jpg	[{'emotion': 'Anger', 'intensity': '3', 'reason': 'I can not imagine what they were and I assume they were not helpful and likely embarrassing. '}, {'emotion': 'Disgust', 'intensity': '1', 'reason': "one didn't know that was the Pittsburgh mayor two what dumb antisemitic bs did trump say"}, {'emotion': 'Contentment', 'intensity': '1', 'reason': "literally don't know what's happening so can't tell…
543	Florida police confiscate guns for the first time under state s new gun-control laws	anonymous-source/all_shooting_images_newest/10161.jpg	[{'emotion': 'Excitement', 'intensity': '3', 'reason': 'florida tends to have very strong opinons collectively that do not align with well-educated citizens of the US and finally police there are doing their job. '}, {'emotion': 'Amusement', 'intensity': '3', 'reason': "I lived in Florida for 7 months and my neighbor was a gun nut who constantly talked about how its so nice there's so few gun res…
544	Poll: Support for gun control hits record high	anonymous-source/all_shooting_images_newest/10092.jpg	[{'emotion': 'Excitement', 'intensity': '3', 'reason': 'they are recognizing the importance of supporting gun control yet if it keeps people safe it should not even be up for debate. '}, {'emotion': 'Excitement', 'intensity': '4', 'reason': 'yay glad people agree'}, {'emotion': 'Excitement', 'intensity': '2', 'reason': "yay that's good but actually do something"}, {'emotion': 'Excitement', 'inten…
545	Vegas garden gives families, shooting victims place to mourn	anonymous-source/all_shooting_images_newest/90043.jpg	[{'emotion': 'Sadness', 'intensity': '3', 'reason': 'sad and angry because of the what happened but glad someone was able to create a space for mourning. '}, {'emotion': 'Disgust', 'intensity': '1', 'reason': 'what kind of place to mourn what do they mean by that. I think the idea of cemeteries and places in honor of people who died feels a little weird'}, {'emotion': 'Sadness', 'intensity': '3',…
547	Father of Parkland victim heckled by gun rights group as he speaks at rally near NRA meeting	anonymous-source/all_shooting_images_newest/10326.jpg	[{'emotion': 'Sadness', 'intensity': '3', 'reason': 'he has been through enough that is the absolute last thing he needed or deserved. That person should be ashamed of themselves. '}, {'emotion': 'Anger', 'intensity': '5', 'reason': "that's horrible whoever heckled him is a horrible person"}, {'emotion': 'Disgust', 'intensity': '5', 'reason': 'who could justify doing that'}, {'emotion': 'Disgust'…
549	Texas man is selling 3D gun blueprints online despite court orders	anonymous-source/all_shooting_images_newest/409.jpg	[{'emotion': 'Anger', 'intensity': '3', 'reason': "people don't listen or care. "}, {'emotion': 'Disgust', 'intensity': '1', 'reason': 'people are dumb why would someone do this'}, {'emotion': 'Anger', 'intensity': '4', 'reason': 'what is happening because of that'}, {'emotion': 'Anger', 'intensity': '3', 'reason': '.'}, {'emotion': 'Fear', 'intensity': '3', 'reason': 'He looks terrifying with a …
559	Calif. teacher arrested for road rage and armed robbery, had loaded gun in classroom during arrest	anonymous-source/all_shooting_images_newest/397.jpg	[{'emotion': 'Fear', 'intensity': '4', 'reason': 'Children are taught to trust teachers and this teacher was clearly unstable and brought a weapon into a safe space.'}, {'emotion': 'Fear', 'intensity': '5', 'reason': 'we let crazy unhinged people around children. '}, {'emotion': 'Fear', 'intensity': '3', 'reason': 'that is a terrifying scenario'}, {'emotion': 'Fear', 'intensity': '3', 'reason': '…
565	Democrats invite students affected by gun violence to intern for the summer	anonymous-source/all_shooting_images_newest/10720.jpg	[{'emotion': 'Contentment', 'intensity': '1', 'reason': 'I think it is a cool gesture to offer these students negatively effected. '}, {'emotion': 'Awe', 'intensity': '1', 'reason': 'do they ask for that '}, {'emotion': 'Contentment', 'intensity': '3', 'reason': 'feels like a pr stunt but i am happy for the students'}, {'emotion': 'Awe', 'intensity': '3', 'reason': 'it was smart of them to choose…
566	Trump dubs California bar shooter 'sick puppy' as community grieves	anonymous-source/all_shooting_images_newest/110128.jpg	[{'emotion': 'Disgust', 'intensity': '3', 'reason': 'This is a very insensitive response, and the country deserves a response that takes the event seriously. '}, {'emotion': 'Disgust', 'intensity': '1', 'reason': 'trumps an idiot '}, {'emotion': 'Disgust', 'intensity': '4', 'reason': 'I really cannot stand trump'}, {'emotion': 'Disgust', 'intensity': '3', 'reason': 'the comments he make are not d…
571	I won't be a Gabby Giffords': Congressman pulls out loaded pistol in front of gun control activists	anonymous-source/all_shooting_images_newest/10531.jpg	[{'emotion': 'Anger', 'intensity': '3', 'reason': 'This is completely inappropriate for a lawmaker to do. Even with a differing opinion, his job is to stay professional. Also, guns are not a toy to be shown off as he did. '}, {'emotion': 'Fear', 'intensity': '1', 'reason': 'this man is an idiot? why would he do that'}, {'emotion': 'Anger', 'intensity': '3', 'reason': 'literally what is up with po…
572	Father of Parkland Shooting Victim Says Brett Kavanaugh 'Turned His Back' to Him at Confirmation Hearing	anonymous-source/all_shooting_images_newest/90190.jpg	[{'emotion': 'Sadness', 'intensity': '2', 'reason': 'I would hope that our lawmakers and judges could have the courage to face the people who they are making decisions on the behalf of. '}, {'emotion': 'Contentment', 'intensity': '1', 'reason': 'why was he there? also and? '}, {'emotion': 'Sadness', 'intensity': '5', 'reason': "this made me really sad, it's so sad how much harm is happening"}, {'…
573	Aurora neighborhood group learns how to stay safe in active shooter situation	anonymous-source/all_shooting_images_newest/90423.jpg	[{'emotion': 'Contentment', 'intensity': '1', 'reason': 'This is normal. This is what I was taught growing up.'}, {'emotion': 'Sadness', 'intensity': '1', 'reason': "not a good enough solution to the problem I don't want an if there's a shooter solution I want a there's no shooters solution"}, {'emotion': 'Sadness', 'intensity': '1', 'reason': 'no strong feelings towards this'}, {'emotion': 'Sadn…
592	Montana governor supports assault weapon ban	anonymous-source/all_shooting_images_newest/499.jpg	[{'emotion': 'Excitement', 'intensity': '4', 'reason': 'I agree with it.'}, {'emotion': 'Awe', 'intensity': '5', 'reason': 'I love that this governor is being open about what they believe in.'}, {'emotion': 'Amusement', 'intensity': '3', 'reason': 'do not understand'}, {'emotion': 'Awe', 'intensity': '3', 'reason': 'Weapons need to be managed. '}, {'emotion': 'Contentment', 'intensity': '3', 'rea…
596	Community mourns after mass shooting at Pittsburgh synagogue	anonymous-source/all_shooting_images_newest/100490.jpg	[{'emotion': 'Sadness', 'intensity': '3', 'reason': 'sad for victims'}, {'emotion': 'Disgust', 'intensity': '5', 'reason': 'Why do people keep shooting at religious places of worship?'}, {'emotion': 'Amusement', 'intensity': '3', 'reason': 'do not understand'}, {'emotion': 'Awe', 'intensity': '3', 'reason': 'people died in shooting event should be respected. '}, {'emotion': 'Sadness', 'intensity'…
606	Las Vegas shooting memorial marks grim anniversary: 'None of us will ever be the same'	anonymous-source/all_shooting_images_newest/100440.jpg	[{'emotion': 'Awe', 'intensity': '4', 'reason': 'This is really memorable.'}, {'emotion': 'Sadness', 'intensity': '3', 'reason': 'I felt extremely sad for the people who died in the shooting. Also sad especially that people are organizing event to memorize people who died'}, {'emotion': 'Sadness', 'intensity': '5', 'reason': 'the quoted used here is very powerful, and I really feel for the commun…
610	These Are The Victims Of The Santa Fe High School Shooting	anonymous-source/all_shooting_images_newest/10044.jpg	[{'emotion': 'Sadness', 'intensity': '4', 'reason': 'Those people are innocent.'}, {'emotion': 'Sadness', 'intensity': '5', 'reason': 'I felt very sad and sorry for people who died in the shooting.'}, {'emotion': 'Sadness', 'intensity': '5', 'reason': 'this headline humanizes the victims and implies that the news outlet is going to show their photos and tell their stories. They were real people w…
612	Rudy Giuliani keeps tweeting on Chicago gun violence and Garry McCarthy says he's 'a proud Democrat'	anonymous-source/all_shooting_images_newest/460.jpg	[{'emotion': 'Contentment', 'intensity': '3', 'reason': 'This is understandable.'}, {'emotion': 'Amusement', 'intensity': '2', 'reason': 'I felt curious about what had happened. Also, I think it is funny to know about these Twitter things and the conflicts. and what he said looks very funny'}, {'emotion': 'Anger', 'intensity': '4', 'reason': 'Giuliani is a controversial figure and I cannot imagin…
620	Son, I love you': Heartbreaking stories emerge of Thousand Oaks mass shooting victims - ABC News	anonymous-source/all_shooting_images_newest/110517.jpg	[{'emotion': 'Sadness', 'intensity': '3', 'reason': 'of the touching words and mourning for those lost because of the shooting.'}, {'emotion': 'Sadness', 'intensity': '5', 'reason': 'The personal quote made the headline seem much more personal.'}, {'emotion': 'Sadness', 'intensity': '4', 'reason': 'Sounds really sad.'}, {'emotion': 'Sadness', 'intensity': '5', 'reason': 'A parent should never hav…
623	Judge blocks release of blueprints for 3D guns	anonymous-source/all_shooting_images_newest/188.jpg	[{'emotion': 'Contentment', 'intensity': '3', 'reason': 'it seems to be the right move to make'}, {'emotion': 'Excitement', 'intensity': '4', 'reason': 'blueprints for 3D guns will likely increase the ability of people who should not have guns, to get guns.'}, {'emotion': 'Contentment', 'intensity': '2', 'reason': 'It sounds like a right thing they just done.'}, {'emotion': 'Contentment', 'intens…
625	Right-Wing Pundit Taunts Survivors of Parkland Shooting for Losing Weapons-Ban Vote in Florida Legislature	anonymous-source/all_shooting_images_newest/10066.jpg	[{'emotion': 'Disgust', 'intensity': '4', 'reason': 'one does not have to rub it in like that'}, {'emotion': 'Disgust', 'intensity': '5', 'reason': 'it is horrible to taunt survivors after such an event irrespective of why.'}, {'emotion': 'Anger', 'intensity': '2', 'reason': 'It sounds bad and should not happen.'}, {'emotion': 'Disgust', 'intensity': '4', 'reason': 'These kids worked hard after s…
643	The Gun Business Is Bouncing Back From a Long Trump Slump	anonymous-source/all_shooting_images_newest/90116.jpg	[{'emotion': 'Sadness', 'intensity': '3', 'reason': "what's the reason for the bouncing back? "}, {'emotion': 'Fear', 'intensity': '3', 'reason': 'Gun business rising in popularity can lead to more gun ownership and possibly violence. '}, {'emotion': 'Sadness', 'intensity': '3', 'reason': 'sad'}, {'emotion': 'Amusement', 'intensity': '3', 'reason': 'Really? Did trump do something good? Why Trump …
652	Trump administration to ban bump stocks for guns	anonymous-source/all_shooting_images_newest/110362.jpg	[{'emotion': 'Amusement', 'intensity': '3', 'reason': 'Plz do not make the news until it becomes the final action. '}, {'emotion': 'Awe', 'intensity': '3', 'reason': 'Not sure what this will mean long term for people buying and investing in guns. '}, {'emotion': 'Anger', 'intensity': '3', 'reason': 'sad'}, {'emotion': 'Excitement', 'intensity': '2', 'reason': 'What do trump want to do? Yeah but a…
655	Eiffel Tower, Empire State Building Go Dark To Honor Pittsburgh Synagogue Shooting Victims	anonymous-source/all_shooting_images_newest/100207.jpg	[{'emotion': 'Sadness', 'intensity': '3', 'reason': 'I truly feel sorry about what happened and all the losses. '}, {'emotion': 'Awe', 'intensity': '3', 'reason': 'I admire the efforts to respect the victims of the Synagogue shootings at major buildings across the world. '}, {'emotion': 'Sadness', 'intensity': '3', 'reason': 'sad'}, {'emotion': 'Sadness', 'intensity': '3', 'reason': 'Sad about th…
658	Rosanne Cash on California Shootings: We Use Young People as Collateral Damage for the Second Amendment	anonymous-source/all_shooting_images_newest/110472.jpg	[{'emotion': 'Sadness', 'intensity': '3', 'reason': 'Thanks for the voice and hope enough attention can be raised to the case. '}, {'emotion': 'Sadness', 'intensity': '3', 'reason': 'This is implying that because of the second amendment young people are dying which is partially true but it is the person behind the gun not the gun itself. '}, {'emotion': 'Anger', 'intensity': '3', 'reason': 'sad'}…
663	Pittsburgh synagogue shooting, mail bombs show US 'toxic' discourse spurs 'deranged' people to act: Ex-DHS chief	anonymous-source/all_shooting_images_newest/100372.jpg	[{'emotion': 'Sadness', 'intensity': '3', 'reason': 'I feel sad about the Pittsburgh synagogue shooting.'}, {'emotion': 'Anger', 'intensity': '3', 'reason': 'confused'}, {'emotion': 'Fear', 'intensity': '4', 'reason': "I think that sounds scary but I don't really understand it "}, {'emotion': 'Sadness', 'intensity': '4', 'reason': 'A place of worship should never be a place, people should be afra…
665	Grieving parents of teen killed in Parkland school shooting use 'graphic activism' to confront the NRA	anonymous-source/all_shooting_images_newest/10860.jpg	[{'emotion': 'Sadness', 'intensity': '3', 'reason': 'I feel sad for the grieving parents of a teen killed in the Parkland school shooting.'}, {'emotion': 'Contentment', 'intensity': '3', 'reason': 'NRA needs to be confronted so i feel good'}, {'emotion': 'Sadness', 'intensity': '4', 'reason': 'sad they have to deal with the loss of their son'}, {'emotion': 'Awe', 'intensity': '4', 'reason': 'the …
670	Health care tops guns, economy as voters' top issue	anonymous-source/all_shooting_images_newest/100090.jpg	[{'emotion': 'Contentment', 'intensity': '3', 'reason': 'I feel happy about the good healthcare.'}, {'emotion': 'Sadness', 'intensity': '3', 'reason': 'not confused what to feel'}, {'emotion': 'Contentment', 'intensity': '3', 'reason': 'not really sure what this means'}, {'emotion': 'Sadness', 'intensity': '4', 'reason': 'it is sad to see that healthcare and gun regulations that top the list of i…
671	Florida state senator: Only thoughts and prayers will stop evil behind shootings	anonymous-source/all_shooting_images_newest/10582.jpg	[{'emotion': 'Anger', 'intensity': '5', 'reason': 'I feel angry because the government should take precautionary measures against gun violence and assume the responsibility for protecting people rather than praying behind.'}, {'emotion': 'Anger', 'intensity': '3', 'reason': 'so much more needs to be done'}, {'emotion': 'Disgust', 'intensity': '4', 'reason': 'thats a horrible thing to say there is…
673	230 officers shifted to Baltimore streets after spate of deadly shootings	anonymous-source/all_shooting_images_newest/100373.jpg	[{'emotion': 'Fear', 'intensity': '4', 'reason': 'I am worried about the deadly shootings.'}, {'emotion': 'Sadness', 'intensity': '3', 'reason': 'sad'}, {'emotion': 'Fear', 'intensity': '4', 'reason': 'scary it has to come down to that'}, {'emotion': 'Fear', 'intensity': '4', 'reason': 'Police brutality is also a very big issue in America so it is difficult and also scary to see that many officer…
674	California lawmakers vote to expand gun restraining orders but ACLU says bill goes too far	anonymous-source/all_shooting_images_newest/10623.jpg	[{'emotion': 'Fear', 'intensity': '3', 'reason': 'I am worried about the final result of expanding gun restraining orders.'}, {'emotion': 'Anger', 'intensity': '3', 'reason': 'i feel upset'}, {'emotion': 'Anger', 'intensity': '4', 'reason': 'this law is not too far it should be passed'}, {'emotion': 'Sadness', 'intensity': '4', 'reason': "even when a State like California tries to fix the problem…
676	I wanted him to feel compassion : The Jewish nurse who treated the synagogue shooting suspect tells his story	anonymous-source/all_shooting_images_newest/110477.jpg	[{'emotion': 'Sadness', 'intensity': '3', 'reason': 'I feel sad for the innocent people.'}, {'emotion': 'Sadness', 'intensity': '3', 'reason': 'sad'}, {'emotion': 'Sadness', 'intensity': '4', 'reason': 'nurse is super strong for doing that but sad she was put in a situation like that'}, {'emotion': 'Contentment', 'intensity': '3', 'reason': 'in a way this makes me have faith in humanity even thou…
681	Toomey, Manchin: Trump's call to act on guns 'very encouraging'	anonymous-source/all_shooting_images_newest/10718.jpg	[{'emotion': 'Contentment', 'intensity': '5', 'reason': 'this is what a president needs to do in order to protect citizens. '}, {'emotion': 'Fear', 'intensity': '3', 'reason': "anything relating to trump scares me, never know what he's going to agree with "}, {'emotion': 'Contentment', 'intensity': '3', 'reason': 'there may be actions taken to reduce the number of shooting crime.'}, {'emotion': '…
683	Plastic 3D guns printed at home will raise threat level for everyone, especially Congress	anonymous-source/all_shooting_images_newest/110.jpg	[{'emotion': 'Contentment', 'intensity': '4', 'reason': 'totally agree with the idea because this makes people uncontrollable. '}, {'emotion': 'Anger', 'intensity': '5', 'reason': 'same reason as before, lack of picture changes nothing'}, {'emotion': 'Fear', 'intensity': '3', 'reason': 'gun causes violence and the problem may become more serious.'}, {'emotion': 'Excitement', 'intensity': '5', 're…
692	After Synagogue Shooting, Trump Retweets Supporter Who Had Retweeted Anti-Semitic Hashtag	anonymous-source/all_shooting_images_newest/100063.jpg	[{'emotion': 'Disgust', 'intensity': '5', 'reason': "Why Trump choose to do this action? isn't he doing the opposite action before with the victims? "}, {'emotion': 'Disgust', 'intensity': '5', 'reason': 'same reason as before'}, {'emotion': 'Anger', 'intensity': '4', 'reason': 'the contradiction would be aroused.'}, {'emotion': 'Disgust', 'intensity': '5', 'reason': "one of the president's of th…
700	Slowik: Thanksgiving Day food drive to honor Rich Central victim of gun violence	anonymous-source/all_shooting_images_newest/110123.jpg	[{'emotion': 'Sadness', 'intensity': '3', 'reason': 'they look sad'}, {'emotion': 'Sadness', 'intensity': '3', 'reason': 'they look sad'}, {'emotion': 'Sadness', 'intensity': '4', 'reason': "it describes how sad it is that people die because of gun violence but slightly happy as well because there is an attempt by the people to 'combat' this using non-violent method and to remember the victims as…
706	E-Sports World Is Rocked as Gunman Clearly Targeted Other Gamers	anonymous-source/all_shooting_images_newest/50.jpg	[{'emotion': 'Sadness', 'intensity': '3', 'reason': 'i see the fireman and the police'}, {'emotion': 'Sadness', 'intensity': '3', 'reason': 'i see the fireman and the police'}, {'emotion': 'Fear', 'intensity': '3', 'reason': 'how certain people are targeted so badly.'}, {'emotion': 'Sadness', 'intensity': '3', 'reason': '.'}, {'emotion': 'Sadness', 'intensity': '3', 'reason': 'People are killing …
710	Another day of funerals as Pittsburgh mourns synagogue shooting victims	anonymous-source/all_shooting_images_newest/110143.jpg	[{'emotion': 'Awe', 'intensity': '3', 'reason': 'he is speaking seriously'}, {'emotion': 'Awe', 'intensity': '3', 'reason': 'he is speaking seriously'}, {'emotion': 'Sadness', 'intensity': '4', 'reason': 'it shows another sad event caused by gun violence.'}, {'emotion': 'Sadness', 'intensity': '3', 'reason': '.'}, {'emotion': 'Sadness', 'intensity': '3', 'reason': 'They lost their lives unnecessa…
714	California Gov. Jerry Brown signs bill banning gun sales to people under 21	anonymous-source/all_shooting_images_newest/90370.jpg	[{'emotion': 'Fear', 'intensity': '3', 'reason': 'gun is dangerous'}, {'emotion': 'Fear', 'intensity': '3', 'reason': 'gun is dangerous'}, {'emotion': 'Contentment', 'intensity': '4', 'reason': 'it is very fair to have that rule because it is very unlikely we will have a person under 21 years old that can wield a gun sensibly.'}, {'emotion': 'Sadness', 'intensity': '3', 'reason': '.'}, {'emotion'…
716	After Jacksonville shooting, is it too early to talk about gun laws? Today's talker	anonymous-source/all_shooting_images_newest/76.jpg	[{'emotion': 'Sadness', 'intensity': '3', 'reason': 'there is probably a crime.'}, {'emotion': 'Sadness', 'intensity': '3', 'reason': 'there is probably a crime.'}, {'emotion': 'Sadness', 'intensity': '2', 'reason': 'they care more about tying this to politics and such rather than focusing on the victims, but I can see this being two sides of a coin - so more of a neutral feeling for me.'}, {'emo…
718	Students team up with Sia to share their powerful message on gun violence Video	anonymous-source/all_shooting_images_newest/100029.jpg	[{'emotion': 'Awe', 'intensity': '3', 'reason': 'he is speaking seriously'}, {'emotion': 'Awe', 'intensity': '3', 'reason': 'he is speaking seriously'}, {'emotion': 'Awe', 'intensity': '4', 'reason': 'of how young people are rising up to promote this issue as well.'}, {'emotion': 'Sadness', 'intensity': '3', 'reason': '.'}, {'emotion': 'Excitement', 'intensity': '3', 'reason': 'This is good will …
719	Parkland Shooting Suspect Lost Special-Needs Help at School When He Needed It Most	anonymous-source/all_shooting_images_newest/457.jpg	[{'emotion': 'Sadness', 'intensity': '4', 'reason': 'it feels like this was a situation that was very avoidable.'}, {'emotion': 'Sadness', 'intensity': '2', 'reason': "One reason why the gun shoting happened is because the suspect's lack of help in mental health issues, making me feel sorry for him. "}, {'emotion': 'Contentment', 'intensity': '3', 'reason': 'since the suspect lost special-needs h…
727	Bank, Enterprise parting with NRA following Florida school massacre	anonymous-source/all_shooting_images_newest/10526.jpg	[{'emotion': 'Contentment', 'intensity': '4', 'reason': 'it seems like more changes are happening where companies are parting with the NRA due to school shootings.'}, {'emotion': 'Contentment', 'intensity': '2', 'reason': 'The bank and enterprise could help NRA to prevent these things to happen again '}, {'emotion': 'Anger', 'intensity': '4', 'reason': "'school massacre' makes me think of innocen…
728	9-year-old robbed at gunpoint at lemonade stand given hundreds in cash, gifts	anonymous-source/all_shooting_images_newest/218.jpg	[{'emotion': 'Excitement', 'intensity': '2', 'reason': 'a kid who got robbed got a lot of support.'}, {'emotion': 'Sadness', 'intensity': '3', 'reason': 'The robbing caused by a nine-year-old kid is sad'}, {'emotion': 'Fear', 'intensity': '5', 'reason': "The words '9 year old robbed at gunpoint' make me feel scary since anybody could be robbed at a gunpoint or even shot dead."}, {'emotion': 'Sadn…
729	Cruz biological mother's past a factor in school shooting	anonymous-source/all_shooting_images_newest/90014.jpg	[{'emotion': 'Sadness', 'intensity': '2', 'reason': 'in hindsight a lot can be said about signs or other things that showed there was a threat but nothing was done to prevent it before it happened.'}, {'emotion': 'Sadness', 'intensity': '2', 'reason': 'The influence of the past is a factor of the shooting, making me think of the mental illness the shooter may have'}, {'emotion': 'Anger', 'intensi…
733	Trump's indefensible response to the synagogue shooting draws outrage	anonymous-source/all_shooting_images_newest/100095.jpg	[{'emotion': 'Anger', 'intensity': '4', 'reason': 'Trump seems to have made an offensive or ignorant remark about the shooting.'}, {'emotion': 'Disgust', 'intensity': '3', 'reason': 'I do not really like president Trump'}, {'emotion': 'Disgust', 'intensity': '4', 'reason': 'Indefensible response by a person held in a responsible position that draws outrage is disgusting'}, {'emotion': 'Disgust', …
736	Vigil held for victims of California bar shooting	anonymous-source/all_shooting_images_newest/110235.jpg	[{'emotion': 'Sadness', 'intensity': '2', 'reason': 'there was another shooting and the headline makes it sound like a normal event.'}, {'emotion': 'Sadness', 'intensity': '3', 'reason': 'reminds me of the shooting '}, {'emotion': 'Sadness', 'intensity': '4', 'reason': 'Felt sad for victims of California bar shooting'}, {'emotion': 'Sadness', 'intensity': '4', 'reason': 'so sad that the shooting …
738	Survivors of Parkland Massacre Held Event Last Month at Site of Jacksonville Mass Shooting	anonymous-source/all_shooting_images_newest/220.jpg	[{'emotion': 'Awe', 'intensity': '2', 'reason': 'survivors are pushing for their ideals and letting their voices be heard.'}, {'emotion': 'Sadness', 'intensity': '2', 'reason': 'Remind me of the gun shooting and how it will impact people'}, {'emotion': 'Contentment', 'intensity': '3', 'reason': 'The survivors gathered again and held and event after the massacre.'}, {'emotion': 'Sadness', 'intensi…
740	Unbearable grief': Pakistani parents of Santa Fe school shooting victim warn of gun culture in US	anonymous-source/all_shooting_images_newest/110117.jpg	[{'emotion': 'Anger', 'intensity': '1', 'reason': 'this should not have been happen'}, {'emotion': 'Amusement', 'intensity': '3', 'reason': 'IDK'}, {'emotion': 'Sadness', 'intensity': '3', 'reason': 'Not proud to be an American. We seem so forward thinking and then you come across issues like gun violence.'}, {'emotion': 'Sadness', 'intensity': '4', 'reason': 'Parents are filling disability about…
743	Don't panic about 3D gun printing. Yet.	anonymous-source/all_shooting_images_newest/27.jpg	[{'emotion': 'Amusement', 'intensity': '2', 'reason': '3d gun'}, {'emotion': 'Disgust', 'intensity': '3', 'reason': 'idk'}, {'emotion': 'Fear', 'intensity': '4', 'reason': "wow that is such a frightening caption. I don't want to think about the fate of our country if any crazy person could print a gun."}, {'emotion': 'Fear', 'intensity': '3', 'reason': 'It means any people can produce guns by the…
751	Trump meets with families of victims of Texas shooting to listen and learn	anonymous-source/all_shooting_images_newest/10670.jpg	[{'emotion': 'Anger', 'intensity': '3', 'reason': 'should prevent this using law'}, {'emotion': 'Contentment', 'intensity': '3', 'reason': 'right'}, {'emotion': 'Disgust', 'intensity': '5', 'reason': "WOW. This has political motives written all over it. He's a pig. I repeat. He is a pig."}, {'emotion': 'Contentment', 'intensity': '4', 'reason': 'This action can lead public to know the real story …
754	California Gov. Jerry Brown signs bill banning gun sales to people under 21, citing Parkland	anonymous-source/all_shooting_images_newest/90282.jpg	[{'emotion': 'Contentment', 'intensity': '3', 'reason': 'agreed'}, {'emotion': 'Disgust', 'intensity': '3', 'reason': 'only require age is not enough'}, {'emotion': 'Excitement', 'intensity': '1', 'reason': 'this is a step in the right direction but could be better'}, {'emotion': 'Amusement', 'intensity': '4', 'reason': 'It is reasonable to sign this bill and protect teenagers because school shoo…
756	In Jacksonville, the $1 Billion-a-Year World of Esports is Rocked by Gunfire	anonymous-source/all_shooting_images_newest/33.jpg	[{'emotion': 'Disgust', 'intensity': '1', 'reason': 'not interested'}, {'emotion': 'Sadness', 'intensity': '3', 'reason': 'idk'}, {'emotion': 'Disgust', 'intensity': '3', 'reason': 'guns are foul'}, {'emotion': 'Fear', 'intensity': '3', 'reason': "Violence game can affect people's behavior in reality"}, {'emotion': 'Anger', 'intensity': '4', 'reason': "It's such a common thing for lives to be los…
759	Family outraged after police kill black man mistaken for mall shooter	anonymous-source/all_shooting_images_newest/110433.jpg	[{'emotion': 'Anger', 'intensity': '3', 'reason': "It's racism."}, {'emotion': 'Anger', 'intensity': '4', 'reason': 'it demonstrates the harmful generalization US law enforcement makes about black people.'}, {'emotion': 'Anger', 'intensity': '3', 'reason': 'I feel anger towards the policemen because of the decision he took and that he based race on it '}, {'emotion': 'Anger', 'intensity': '3', 'r…
761	Marco Rubio, Bill Nelson push states to get gun restraining order laws	anonymous-source/all_shooting_images_newest/10802.jpg	[{'emotion': 'Contentment', 'intensity': '3', 'reason': 'Gun should be banned in this country.'}, {'emotion': 'Excitement', 'intensity': '5', 'reason': 'I believe gun control is something we have needed for a song time.'}, {'emotion': 'Contentment', 'intensity': '3', 'reason': 'that laws against guns are being supported '}, {'emotion': 'Contentment', 'intensity': '3', 'reason': 'pro-social behavi…
763	U.S. judge extends ban of online 3-D printed gun blueprints	anonymous-source/all_shooting_images_newest/260.jpg	[{'emotion': 'Excitement', 'intensity': '3', 'reason': '3-D printed gun is also dangerous.'}, {'emotion': 'Awe', 'intensity': '3', 'reason': 'I was unaware of the existence of 3-D printed guns.'}, {'emotion': 'Contentment', 'intensity': '3', 'reason': 'this headline shows that not only the distribution of guns is being looked at but also production '}, {'emotion': 'Contentment', 'intensity': '3',…
768	Dems Speak Out Against Gun Violence, Hate Crimes In Aftermath Of Pittsburgh Shooting	anonymous-source/all_shooting_images_newest/100305.jpg	[{'emotion': 'Contentment', 'intensity': '3', 'reason': 'Gun should be banned in this country not just gun violence.'}, {'emotion': 'Contentment', 'intensity': '4', 'reason': 'it makes me proud to be a democrat.'}, {'emotion': 'Fear', 'intensity': '3', 'reason': 'the news are very tragic and the idea of hate crimes is scary'}, {'emotion': 'Fear', 'intensity': '2', 'reason': 'hate crime'}, {'emoti…
769	Michigan man to be sentenced for shooting at lost black teen	anonymous-source/all_shooting_images_newest/110503.jpg	[{'emotion': 'Anger', 'intensity': '3', 'reason': 'Gun should be banned in this country.'}, {'emotion': 'Excitement', 'intensity': '5', 'reason': 'sentences will show gunmen that their actions have consequences.'}, {'emotion': 'Contentment', 'intensity': '3', 'reason': 'it sounds like justice is being applied'}, {'emotion': 'Contentment', 'intensity': '3', 'reason': 'gunman is punished'}, {'emoti…
770	Justice Department rolls out new effort to counter gun violence	anonymous-source/all_shooting_images_newest/10017.jpg	[{'emotion': 'Contentment', 'intensity': '3', 'reason': 'Yes, the department should start paying efforts on countering gun violence.'}, {'emotion': 'Excitement', 'intensity': '5', 'reason': 'it shows a step in the right direction.'}, {'emotion': 'Contentment', 'intensity': '3', 'reason': 'that more action is being taken'}, {'emotion': 'Contentment', 'intensity': '3', 'reason': 'pro social act'}, …
774	Protesters march on Lake Shore Drive to call attention to gun violence	anonymous-source/all_shooting_images_newest/231.jpg	[{'emotion': 'Contentment', 'intensity': '3', 'reason': 'I think the government should do something about gun control.'}, {'emotion': 'Contentment', 'intensity': '4', 'reason': 'it is good to see people speaking up for what they believe in.'}, {'emotion': 'Excitement', 'intensity': '3', 'reason': 'Marches are a peaceful way to protest. It is good to hear they are happening'}, {'emotion': 'Content…
780	For Parents of Shooting Victims, a Support Network That Keeps Growing	anonymous-source/all_shooting_images_newest/10483.jpg	[{'emotion': 'Sadness', 'intensity': '3', 'reason': 'feel sad for those lost their children'}, {'emotion': 'Contentment', 'intensity': '4', 'reason': 'This makes me happy because it is encouraging to see that people who have been affected by gun violence are able to receive support.'}, {'emotion': 'Sadness', 'intensity': '1', 'reason': 'the growing amount of people who have lost loved ones due to…
784	Justices Won t Hear Case on Waiting Period for Gun Purchases	anonymous-source/all_shooting_images_newest/10183.jpg	[{'emotion': 'Anger', 'intensity': '5', 'reason': "The government doesn't care about the gun violence."}, {'emotion': 'Anger', 'intensity': '2', 'reason': 'This makes me angry because it seems like the issue of gun violence is not being directly addressed at the justice system or they are just overlooking it.'}, {'emotion': 'Fear', 'intensity': '1', 'reason': 'Unfamiliar with the exact logistics …
785	Florida Senate rejects ban on assault weapons, votes to arm teachers	anonymous-source/all_shooting_images_newest/10642.jpg	[{'emotion': 'Anger', 'intensity': '3', 'reason': "The government doesn't care about the gun violence."}, {'emotion': 'Anger', 'intensity': '4', 'reason': "This makes me angry because I don't think arming teachings is the solution to the gun violence issue."}, {'emotion': 'Fear', 'intensity': '1', 'reason': 'School environments are extremely unpredictable and arming schoolteachers on such a grand…
786	Las Vegas shooting victims honored in emotional anniversary ceremony: 'Our 58 angels are with us'	anonymous-source/all_shooting_images_newest/100497.jpg	[{'emotion': 'Sadness', 'intensity': '3', 'reason': 'sad for these who died'}, {'emotion': 'Sadness', 'intensity': '4', 'reason': 'This makes me feel sad because innocent lives did not have to be lost due to gun violence.'}, {'emotion': 'Sadness', 'intensity': '1', 'reason': 'Facing the possibility of lives being lost so suddenly due to gun violence.'}, {'emotion': 'Sadness', 'intensity': '5', 'r…
787	Here s Why Businesses Are Dropping the NRA and Why Politicians Are Reluctant To It s Not About Values	anonymous-source/all_shooting_images_newest/10167.jpg	[{'emotion': 'Sadness', 'intensity': '3', 'reason': 'feel sad for NRA'}, {'emotion': 'Excitement', 'intensity': '3', 'reason': 'This makes me excited because it is important for brands to be transparent about their values and when they openly disagree with a corporation it raises more public awareness.'}, {'emotion': 'Sadness', 'intensity': '1', 'reason': "implications of politicians who are in c…
788	Faith Hill and Tim McGraw Say They Support 'Sensible' Gun Control	anonymous-source/all_shooting_images_newest/104.jpg	[{'emotion': 'Contentment', 'intensity': '3', 'reason': 'feel content about their proposals'}, {'emotion': 'Amusement', 'intensity': '2', 'reason': "I feel neutral because these public figures don't affect me in any way so I don't really feel one way or the other."}, {'emotion': 'Amusement', 'intensity': '1', 'reason': 'Too little specificity in the headline; unfamiliarity with individuals mentio…
793	America's increasing moral panic over active shooters is overblown and counterproductive	anonymous-source/all_shooting_images_newest/444.jpg	[{'emotion': 'Sadness', 'intensity': '4', 'reason': 'sad about the gun violence'}, {'emotion': 'Anger', 'intensity': '4', 'reason': 'This makes me angry because I think the reactions over gun violence are completely valid.'}, {'emotion': 'Fear', 'intensity': '1', 'reason': 'sense of ubiquitous panic regarding the prevalence of gun violence.'}, {'emotion': 'Anger', 'intensity': '5', 'reason': "no …
794	Inside the NRA s annual meeting: Guns, ammunition, family and politics	anonymous-source/all_shooting_images_newest/10231.jpg	[{'emotion': 'Sadness', 'intensity': '3', 'reason': 'feel sad about gun violence '}, {'emotion': 'Disgust', 'intensity': '4', 'reason': 'I feel disgust because it seems so strange to be associating family and politics in relation to guns and ammunition.'}, {'emotion': 'Fear', 'intensity': '1', 'reason': "anxiety regarding the complex issue of regulating powerful weapons with the potential to kill…
796	Temple Israel, Gary community mourns Pittsburgh shooting victims: 'We come together to condemn the violence and hate'	anonymous-source/all_shooting_images_newest/110007.jpg	[{'emotion': 'Sadness', 'intensity': '3', 'reason': 'feel sad about the gun violence '}, {'emotion': 'Sadness', 'intensity': '4', 'reason': 'this makes me sad because gun violence and hate crimes have started to go hand in hand which is scary and upsetting for minorities.'}, {'emotion': 'Sadness', 'intensity': '1', 'reason': 'ubiquitous threat of losing loved ones and community members through gu…
798	Jacksonville 'mass shooting' sparks reaction from political figures: 'Horrifying news'	anonymous-source/all_shooting_images_newest/123.jpg	[{'emotion': 'Fear', 'intensity': '3', 'reason': 'feel fear about the gun violence'}, {'emotion': 'Sadness', 'intensity': '4', 'reason': 'This makes me sad because hearing about a new act of gun violence is always deeply upsetting.'}, {'emotion': 'Disgust', 'intensity': '1', 'reason': 'headlines like this are so common that gun violence seems inescapable, constant, and pervasive.'}, {'emotion': '…
799	How Many States Will Pass Gun-Control Laws Before Recess?	anonymous-source/all_shooting_images_newest/10579.jpg	[{'emotion': 'Amusement', 'intensity': '2', 'reason': 'control guns\r\n'}, {'emotion': 'Amusement', 'intensity': '1', 'reason': 'I want to know which states will pass gun-control laws.'}, {'emotion': 'Sadness', 'intensity': '4', 'reason': 'probably not many'}, {'emotion': 'Sadness', 'intensity': '1', 'reason': 'how long will people have to wait before there is actual reform in our society'}, {'em…
801	Pritzker blames Rauner, social service cuts for city's gun violence	anonymous-source/all_shooting_images_newest/209.jpg	[{'emotion': 'Fear', 'intensity': '1', 'reason': 'there are too many gun violence\r\n'}, {'emotion': 'Amusement', 'intensity': '2', 'reason': "I don't know who Pritzker or Rauner are."}, {'emotion': 'Awe', 'intensity': '3', 'reason': 'I want to know more'}, {'emotion': 'Sadness', 'intensity': '1', 'reason': 'Is that truly the issue though, maybe they are not treating people well enough'}, {'emoti…
804	People across the country come together to condemn gun violence Video	anonymous-source/all_shooting_images_newest/10227.jpg	[{'emotion': 'Amusement', 'intensity': '4', 'reason': 'control guns'}, {'emotion': 'Contentment', 'intensity': '3', 'reason': 'people are unifying for a cause, which is always heartening to see.'}, {'emotion': 'Awe', 'intensity': '4', 'reason': 'I want to know what video this is referring to'}, {'emotion': 'Contentment', 'intensity': '1', 'reason': 'everyone is more or less in sync with how gun v…
810	Oklahoma governor angers gun and gay rights groups same day	anonymous-source/all_shooting_images_newest/10215.jpg	[{'emotion': 'Awe', 'intensity': '1', 'reason': 'its the true thing to do '}, {'emotion': 'Amusement', 'intensity': '4', 'reason': "the headline mentions a connection between gun rand gay rights groups, which I'd like to learn more about."}, {'emotion': 'Amusement', 'intensity': '2', 'reason': 'ah of course Oklahoma '}, {'emotion': 'Amusement', 'intensity': '1', 'reason': 'they probably said some…
811	Ex-GOP governor tells toy it can buy a semi-automatic weapon for 'ethnic cleansing'	anonymous-source/all_shooting_images_newest/226.jpg	[{'emotion': 'Disgust', 'intensity': '1', 'reason': 'disgusting '}, {'emotion': 'Fear', 'intensity': '2', 'reason': "the headline mentions the potential use of gun violence for 'ethnic cleansing'."}, {'emotion': 'Disgust', 'intensity': '3', 'reason': 'huh???? toy??? ethnic cleansing??'}, {'emotion': 'Sadness', 'intensity': '1', 'reason': 'This is so sad and confusing, why say it to a toy'}, {'emo…
812	Democratic state gains may mean tighter gun, looser pot laws	anonymous-source/all_shooting_images_newest/110339.jpg	[{'emotion': 'Disgust', 'intensity': '1', 'reason': 'we need to control guns'}, {'emotion': 'Amusement', 'intensity': '2', 'reason': 'I want to know how tighter gun laws would lead to looser pot laws and what the implications of that are.'}, {'emotion': 'Contentment', 'intensity': '5', 'reason': 'GOOD'}, {'emotion': 'Contentment', 'intensity': '1', 'reason': 'I would be fine with that, gun laws a…
817	Jake Paul's video about school shootings doesn't involve any actual gun control	anonymous-source/all_shooting_images_newest/10542.jpg	[{'emotion': 'Disgust', 'intensity': '4', 'reason': 'we need to do something'}, {'emotion': 'Disgust', 'intensity': '3', 'reason': 'I have a negative view of Jake and Logan Paul due to their past history on social media.'}, {'emotion': 'Amusement', 'intensity': '5', 'reason': 'what do you expect from Jake Paul'}, {'emotion': 'Disgust', 'intensity': '1', 'reason': 'why would people listen to an in…
826	Alleged D.C. white nationalist denied bail on gun-related charges	anonymous-source/all_shooting_images_newest/110280.jpg	[{'emotion': 'Contentment', 'intensity': '3', 'reason': 'I think this will be a great hit on the ones against gun control and avoid more shooting.'}, {'emotion': 'Contentment', 'intensity': '3', 'reason': 'justice served'}, {'emotion': 'Fear', 'intensity': '4', 'reason': "No one can guarantee that he won't get involved in gun violence again if he is released on bail."}, {'emotion': 'Contentment',…
827	Companies develop bulletproof clothing to protect against shootings	anonymous-source/all_shooting_images_newest/10506.jpg	[{'emotion': 'Sadness', 'intensity': '3', 'reason': 'It seems to me that the companies are using the victims of these mass shootings as free advertisement for their product.'}, {'emotion': 'Excitement', 'intensity': '3', 'reason': 'interested in how it works, excited for deployment'}, {'emotion': 'Fear', 'intensity': '4', 'reason': 'It shows how serious how firearms problem is.'}, {'emotion': 'Sa…
828	James Corden delivers emotional plea for gun control legislation	anonymous-source/all_shooting_images_newest/110404.jpg	[{'emotion': 'Contentment', 'intensity': '3', 'reason': 'A famous host taking a stand that will be viewed nation wide.'}, {'emotion': 'Anger', 'intensity': '3', 'reason': 'make him pay'}, {'emotion': 'Excitement', 'intensity': '4', 'reason': 'Honestly, I would like to know what emotionla plea drives him.'}, {'emotion': 'Contentment', 'intensity': '3', 'reason': 'IDK'}, {'emotion': 'Contentment', …
841	Trump says he would run into Parkland high school even if I didn t have a weapon	anonymous-source/all_shooting_images_newest/10831.jpg	[{'emotion': 'Disgust', 'intensity': '3', 'reason': "he's just saying it. if he is actually there, might not be what he would do\r\n"}, {'emotion': 'Disgust', 'intensity': '4', 'reason': 'he will never actually do that. hate that he lies to get more attention '}, {'emotion': 'Amusement', 'intensity': '3', 'reason': "I wouldn't take it very seriously because Trump changes his idea every day and th…
844	Student gun control advocates protest outside Smith & Wesson	anonymous-source/all_shooting_images_newest/307.jpg	[{'emotion': 'Amusement', 'intensity': '1', 'reason': "because i am also a student, i resonate with them a lot. however, I'm not sure if protesting outside of a gun store would be a good idea\r\n"}, {'emotion': 'Awe', 'intensity': '3', 'reason': 'feels proud for those who speak up against gun violence'}, {'emotion': 'Excitement', 'intensity': '3', 'reason': "I'm happy to see a lot of people actua…
853	L.A. councilman wants to make it illegal to download blueprints for a printable gun	anonymous-source/all_shooting_images_newest/395.jpg	[{'emotion': 'Amusement', 'intensity': '1', 'reason': 'want to read more, and pretty surprised to see someone against printable guns'}, {'emotion': 'Contentment', 'intensity': '3', 'reason': 'it is the right thing to do, knowing they will do this makes me feel more safe'}, {'emotion': 'Contentment', 'intensity': '3', 'reason': 'I feel like this is the right thing to do. This reduces the likelihoo…
858	Mom with 'gut feeling' stops school shooter before planned attack	anonymous-source/all_shooting_images_newest/100374.jpg	[{'emotion': 'Fear', 'intensity': '2', 'reason': '"mom" and gut feeling" caught my attention. worried about whether the mom got hurt'}, {'emotion': 'Awe', 'intensity': '2', 'reason': 'glad the mother was able to find out the issue, she saved the entire family '}, {'emotion': 'Excitement', 'intensity': '4', 'reason': 'She is such a brave and clever mom. She probably have saved many students from b…
860	Somber tributes, dimmed lights on Vegas shooting anniversary	anonymous-source/all_shooting_images_newest/100435.jpg	[{'emotion': 'Sadness', 'intensity': '5', 'reason': 'The Vegas shooting in which so many people were killed, injured, and traumatized, makes me really sad.'}, {'emotion': 'Fear', 'intensity': '3', 'reason': 'fear'}, {'emotion': 'Contentment', 'intensity': '3', 'reason': 'content'}, {'emotion': 'Sadness', 'intensity': '3', 'reason': 'people are mourning for the victims'}, {'emotion': 'Sadness', 'i…
862	California governor signs raft of gun control bills into law	anonymous-source/all_shooting_images_newest/90422.jpg	[{'emotion': 'Contentment', 'intensity': '2', 'reason': 'I mean not very extreme, but at least there are some gun control laws being put into place.'}, {'emotion': 'Fear', 'intensity': '3', 'reason': 'fear'}, {'emotion': 'Fear', 'intensity': '3', 'reason': 'fear'}, {'emotion': 'Excitement', 'intensity': '3', 'reason': 'I agreed with the action'}, {'emotion': 'Contentment', 'intensity': '4', 'reas…
865	Generation Z reported the most mental health problems, and gun violence is the biggest stressor	anonymous-source/all_shooting_images_newest/100017.jpg	[{'emotion': 'Sadness', 'intensity': '4', 'reason': 'I relate to this. I am incredibly terrified of gun violence.'}, {'emotion': 'Fear', 'intensity': '3', 'reason': 'fear'}, {'emotion': 'Awe', 'intensity': '3', 'reason': 'awe'}, {'emotion': 'Sadness', 'intensity': '3', 'reason': 'both the two problems are very important'}, {'emotion': 'Sadness', 'intensity': '4', 'reason': 'I too am fearful of gu…
866	Grief and Self-Doubt Follow Shooting at Trenton Arts Festival	anonymous-source/all_shooting_images_newest/10450.jpg	[{'emotion': 'Sadness', 'intensity': '4', 'reason': "It is so sad that there are mass shootings at all. And then on top of that at these art festivals that are supposed to be celebrating people's crafts and talents and showcasing their work. People are supposed to be enjoying themselves."}, {'emotion': 'Fear', 'intensity': '3', 'reason': 'fear'}, {'emotion': 'Awe', 'intensity': '3', 'reason': 'aw…
867	NRA Spokesperson Dana Loesch on Brett Kavanaugh Allegations: 'Our Nation's Boys Are at Stake'	anonymous-source/all_shooting_images_newest/90311.jpg	[{'emotion': 'Disgust', 'intensity': '2', 'reason': 'I honestly do not know much about these circumstances, but I do not have a good feeling based on the tone of the headline and that it is quoting a spokesperson from the NRA, as I would assume it is pro-gun.'}, {'emotion': 'Fear', 'intensity': '3', 'reason': 'fear'}, {'emotion': 'Awe', 'intensity': '3', 'reason': 'awe'}, {'emotion': 'Sadness', '…
870	Dentist Killed in Pittsburgh Synagogue Shooting Tried to 'Heal the World' With Work Treating Immigrants and Refugees	anonymous-source/all_shooting_images_newest/100437.jpg	[{'emotion': 'Sadness', 'intensity': '5', 'reason': 'This is just so messed up. That is so incredibly sad, hearing a story of a medical professional just trying to do some good and help people in need getting killed. And getting shot in a synagogue, which is supposed to be a place of peace, worship, and safety.'}, {'emotion': 'Fear', 'intensity': '3', 'reason': 'fear'}, {'emotion': 'Awe', 'intens…
875	Why it Matters: Parkland shooting survivors on what's driving them to vote	anonymous-source/all_shooting_images_newest/100131.jpg	[{'emotion': 'Awe', 'intensity': '1', 'reason': 'I am sad that they are victims, the shooting makes me sad, but I am interested in what they have to say about voting and how they would encourage others to vote.'}, {'emotion': 'Fear', 'intensity': '3', 'reason': 'fear'}, {'emotion': 'Awe', 'intensity': '3', 'reason': 'awe'}, {'emotion': 'Sadness', 'intensity': '3', 'reason': 'the survivor vote for…
877	NRA TV Airs Photo of Thomas The Tank Engine In KKK Hood In 'Ethnic Diversity' Segment	anonymous-source/all_shooting_images_newest/90366.jpg	[{'emotion': 'Fear', 'intensity': '3', 'reason': 'What the heck, that is terrifying... and very insensitive.'}, {'emotion': 'Fear', 'intensity': '3', 'reason': 'fear'}, {'emotion': 'Awe', 'intensity': '3', 'reason': 'awe'}, {'emotion': 'Anger', 'intensity': '3', 'reason': 'an issue about racism'}, {'emotion': 'Disgust', 'intensity': '4', 'reason': 'My siblings and I loved Thomas the Tank as child…
879	White man pulls gun in confrontation with black Florida A&M students	anonymous-source/all_shooting_images_newest/90451.jpg	[{'emotion': 'Fear', 'intensity': '3', 'reason': 'fear'}, {'emotion': 'Anger', 'intensity': '4', 'reason': 'besides threatening students with guns, the issue of inequality is not taken seriously.'}, {'emotion': 'Anger', 'intensity': '4', 'reason': 'it is hard not to see this problem as a racially motivated attack. '}, {'emotion': 'Anger', 'intensity': '4', 'reason': 'the action is related to gun …
883	Pittsburgh shooting: 11 dead in synagogue attack with suspect Rob Bowers to face federal hate crime charges	anonymous-source/all_shooting_images_newest/100322.jpg	[{'emotion': 'Fear', 'intensity': '3', 'reason': 'fear'}, {'emotion': 'Sadness', 'intensity': '4', 'reason': 'people died in synagogue attack only because of hate crimes.'}, {'emotion': 'Anger', 'intensity': '4', 'reason': 'it is not fair for the people who lost their lives and their families. This should never have happened in the first place and it is so confusing that gun reform is still a que…
885	Pro-gun advocates are stepping up their attacks on Parkland students David Hogg and Emma Gonz??lez.	anonymous-source/all_shooting_images_newest/10811.jpg	[{'emotion': 'Fear', 'intensity': '3', 'reason': 'fear'}, {'emotion': 'Anger', 'intensity': '2', 'reason': 'pro-gun advocates have no right to attack students.'}, {'emotion': 'Anger', 'intensity': '4', 'reason': 'these are adults attacking children who lost so much at a very young age. The fact that this is a headline is disappointing to see. '}, {'emotion': 'Anger', 'intensity': '3', 'reason': '…
894	Investors pressure gun industry but there are limits	anonymous-source/all_shooting_images_newest/10593.jpg	[{'emotion': 'Fear', 'intensity': '3', 'reason': 'fear'}, {'emotion': 'Contentment', 'intensity': '2', 'reason': 'even though investors may promote gun industry, there should be limits in order to ensure safety.'}, {'emotion': 'Anger', 'intensity': '4', 'reason': 'it looks like the investors only have an interest in themselves and not the innocent lives that have been lost. (I was a bit confused …
896	Carpenter erects wooden crosses in honor of shooting rampage victims	anonymous-source/all_shooting_images_newest/110405.jpg	[{'emotion': 'Fear', 'intensity': '3', 'reason': 'fear'}, {'emotion': 'Awe', 'intensity': '4', 'reason': 'victims are still being cared and remembered by everyone.'}, {'emotion': 'Sadness', 'intensity': '4', 'reason': 'every time I read a headline about a shooting I lose faith in this country and their lack of effort to push for gun control. '}, {'emotion': 'Sadness', 'intensity': '3', 'reason': …
899	I think I'm going to kill the president,' Utah man allegedly told police after 6 guns found in car: reports	anonymous-source/all_shooting_images_newest/90303.jpg	[{'emotion': 'Fear', 'intensity': '3', 'reason': 'Everything about gun violence makes me nervous'}, {'emotion': 'Fear', 'intensity': '3', 'reason': 'Bad people could use guns to hurt others.'}, {'emotion': 'Sadness', 'intensity': '3', 'reason': 'people use violence to solve problem'}, {'emotion': 'Fear', 'intensity': '3', 'reason': 'why are people carrying guns around '}, {'emotion': 'Fear', 'int…
909	1 year after Vegas shooting, survivors describe 'new normal'	anonymous-source/all_shooting_images_newest/90409.jpg	[{'emotion': 'Fear', 'intensity': '3', 'reason': 'Everything about gun violence makes me nervous'}, {'emotion': 'Contentment', 'intensity': '3', 'reason': 'Good thing for gun controll.'}, {'emotion': 'Sadness', 'intensity': '3', 'reason': 'they can never be the same as before'}, {'emotion': 'Sadness', 'intensity': '3', 'reason': 'that their lives has permanently changed because of shooting '}, {'…
918	Majority of Republicans Support Raising Minimum Gun Age to 21, Poll Finds	anonymous-source/all_shooting_images_newest/151.jpg	[{'emotion': 'Fear', 'intensity': '4', 'reason': '/'}, {'emotion': 'Awe', 'intensity': '4', 'reason': 'they support'}, {'emotion': 'Contentment', 'intensity': '3', 'reason': 'at least the legal age to hold a gun will be increased'}, {'emotion': 'Excitement', 'intensity': '3', 'reason': 'I support making changes to reduce gun violence so this excites me'}, {'emotion': 'Contentment', 'intensity': '…
922	Bank of America to stop lending to makers of 'military-style firearms'	anonymous-source/all_shooting_images_newest/10485.jpg	[{'emotion': 'Contentment', 'intensity': '4', 'reason': '/'}, {'emotion': 'Awe', 'intensity': '4', 'reason': 'go them'}, {'emotion': 'Contentment', 'intensity': '3', 'reason': 'it might stop more people purchasing guns'}, {'emotion': 'Contentment', 'intensity': '3', 'reason': 'this headline does not invoke any serious emotion from me in relation to gun violence'}, {'emotion': 'Sadness', 'intensit…
930	New York Gov. Cuomo calls on states to outlaw NRA-branded insurance coverage	anonymous-source/all_shooting_images_newest/86.jpg	[{'emotion': 'Contentment', 'intensity': '4', 'reason': '/'}, {'emotion': 'Contentment', 'intensity': '3', 'reason': 'good'}, {'emotion': 'Contentment', 'intensity': '3', 'reason': 'it might reduce accidents with gun'}, {'emotion': 'Contentment', 'intensity': '2', 'reason': 'I like seeing efforts to reducing gun violence being made but it is unfortunate certain businesses have to suffer'}, {'emot…
934	Memorial in downtown Las Vegas honors victims of October shooting rampage	anonymous-source/all_shooting_images_newest/90459.jpg	[{'emotion': 'Awe', 'intensity': '4', 'reason': '/'}, {'emotion': 'Sadness', 'intensity': '5', 'reason': 'poor families'}, {'emotion': 'Sadness', 'intensity': '3', 'reason': 'remembering those who lost their lives'}, {'emotion': 'Sadness', 'intensity': '3', 'reason': 'it reminded me of the horrific events that happened in Vegas'}, {'emotion': 'Sadness', 'intensity': '3', 'reason': 'seeing the vic…
940	South Carolina congressman draws gun at constituent meeting	anonymous-source/all_shooting_images_newest/10309.jpg	[{'emotion': 'Disgust', 'intensity': '5', 'reason': 'Its awful that people draw guns in public but it is especially heinous for an elected official to do this'}, {'emotion': 'Fear', 'intensity': '3', 'reason': 'Bad thing for gun controll.'}, {'emotion': 'Fear', 'intensity': '3', 'reason': "I don't know the context, but it would be scary if it were in self-defense or just randomly."}, {'emotion': …
945	NY Dem politician urges off-duty cops to carry even during worship: Bring your firearm to church	anonymous-source/all_shooting_images_newest/100345.jpg	[{'emotion': 'Disgust', 'intensity': '5', 'reason': 'its sad and gross that people would bring guns to places of worship and that we live in a society where off duty police are being told to do so in case a shooting incident occurs in a place of worship'}, {'emotion': 'Contentment', 'intensity': '3', 'reason': 'Polce could protect the people.'}, {'emotion': 'Fear', 'intensity': '5', 'reason': 'It…
946	Former student accused of bringing replica gun into Oswego High School	anonymous-source/all_shooting_images_newest/287.jpg	[{'emotion': 'Sadness', 'intensity': '5', 'reason': 'its sad that a student would do this and that children are exposed to guns so early'}, {'emotion': 'Fear', 'intensity': '3', 'reason': 'Students should not have guns.'}, {'emotion': 'Fear', 'intensity': '4', 'reason': 'It is scary that anyone can walk onto campus with a gun.'}, {'emotion': 'Fear', 'intensity': '3', 'reason': 'Everything about g…
949	Smith & Wesson revenue from long-gun sales fell 50 percent this year: report	anonymous-source/all_shooting_images_newest/200.jpg	[{'emotion': 'Excitement', 'intensity': '3', 'reason': 'I want gun sellers to lose money'}, {'emotion': 'Contentment', 'intensity': '3', 'reason': 'Good thing for gun controll.'}, {'emotion': 'Contentment', 'intensity': '1', 'reason': 'It makes me feel somewhat less bad to know that gun sales were dropping, so hopefully less people have guns.'}, {'emotion': 'Sadness', 'intensity': '3', 'reason': …
950	Trump defends NRA amid gun law debate	anonymous-source/all_shooting_images_newest/10318.jpg	[{'emotion': 'Anger', 'intensity': '5', 'reason': 'i hate trump and the nra'}, {'emotion': 'Anger', 'intensity': '3', 'reason': 'Bad thing for gun controll.'}, {'emotion': 'Fear', 'intensity': '4', 'reason': 'It is scary to know that the President was defending guns.'}, {'emotion': 'Fear', 'intensity': '3', 'reason': 'Everything about gun violence makes me nervous'}, {'emotion': 'Anger', 'intensi…
951	As a Federal Judge Blocks 3D Gun Blueprints, Trump Shifts Away From the NRA	anonymous-source/all_shooting_images_newest/339.jpg	[{'emotion': 'Excitement', 'intensity': '4', 'reason': "I'm glad that a judge blocked 3D gun blueprints and that trump shifted away from the nra"}, {'emotion': 'Contentment', 'intensity': '3', 'reason': 'Good thing for gun controll.'}, {'emotion': 'Disgust', 'intensity': '1', 'reason': 'Why would he switch after that? But also good that judge blocked those blueprints.'}, {'emotion': 'Fear', 'inte…
956	US schools implement new safety measures in wake of recent mass shootings	anonymous-source/all_shooting_images_newest/358.jpg	[{'emotion': 'Sadness', 'intensity': '5', 'reason': 'its sad that kids have to deal with this'}, {'emotion': 'Contentment', 'intensity': '3', 'reason': 'Good thing for studnets safety.'}, {'emotion': 'Contentment', 'intensity': '2', 'reason': 'New safety measure are hopefully good and will help protect students, but still scary that it even had to come to that.'}, {'emotion': 'Fear', 'intensity':…
964	Students have a right to protest gun violence, but they can t disrupt class	anonymous-source/all_shooting_images_newest/10690.jpg	[{'emotion': 'Anger', 'intensity': '2', 'reason': "I do agree that students protesting shouldn't disturb class for those who want to learn but at the same time, we have to be loud to get the attention of the people on top."}, {'emotion': 'Anger', 'intensity': '5', 'reason': 'Students are dying in their schools and they still need permission to protest guns which I find ridiculous. '}, {'emotion':…
970	President Trump's school safety commission will not be looking at role of guns, chair says	anonymous-source/all_shooting_images_newest/10518.jpg	[{'emotion': 'Anger', 'intensity': '4', 'reason': 'School shootings are one of the main reasons why children are afraid to go to school and parents are afraid to send their children to school. There have been way to many incidents of gun violence at schools for their role to be be ignored.'}, {'emotion': 'Disgust', 'intensity': '4', 'reason': 'nothing is being done against guns and school shootin…
972	Videos show calm man shooting five as police close in	anonymous-source/all_shooting_images_newest/90271.jpg	[{'emotion': 'Fear', 'intensity': '5', 'reason': "This is extremely frightening and unsettling, especially because he was calm and he shot people when the police were closing in. It conveys to me that that man isn't fit to have access to guns and that there should be stricter gun laws to prevent this from happening again. "}, {'emotion': 'Anger', 'intensity': '5', 'reason': "The headline doesn't …
980	Televised meetings over school shootings are cathartic, but change nothing	anonymous-source/all_shooting_images_newest/10499.jpg	[{'emotion': 'Sadness', 'intensity': '3', 'reason': "it's hard to change other people's established beliefs."}, {'emotion': 'Awe', 'intensity': '2', 'reason': 'I would like to hear why these meetings "change nothing" and their evidence. '}, {'emotion': 'Sadness', 'intensity': '3', 'reason': 'I feel sad that shootings occur. I feel anger and disgust when shootings occur without anything I can do a…
985	Pittsburgh holds last funeral in synagogue shooting for oldest victim	anonymous-source/all_shooting_images_newest/110057.jpg	[{'emotion': 'Sadness', 'intensity': '3', 'reason': 'No victim deserves that.'}, {'emotion': 'Sadness', 'intensity': '4', 'reason': 'I am saddened to remember this horrible shooting.'}, {'emotion': 'Sadness', 'intensity': '2', 'reason': 'I feel slightly content over the positive aspect of the event. I feel sadness and anger over the origin of the event.'}, {'emotion': 'Sadness', 'intensity': '3',…
986	NRA Chief Defends Gun Rights in Wake of School Shooting	anonymous-source/all_shooting_images_newest/10363.jpg	[{'emotion': 'Anger', 'intensity': '3', 'reason': 'school shootings are tragedy and NRA chief is still defending this for money.'}, {'emotion': 'Anger', 'intensity': '4', 'reason': 'I am highly critical of the NRA and its practices, and disagree with their messaging as outlined in the headline. '}, {'emotion': 'Disgust', 'intensity': '4', 'reason': 'I feel sad, angry and disgust by what I believe…
987	How the Madden community is responding to the Jacksonville shooting.	anonymous-source/all_shooting_images_newest/124.jpg	[{'emotion': 'Sadness', 'intensity': '3', 'reason': 'shooting should have been prevented in all cost.'}, {'emotion': 'Sadness', 'intensity': '2', 'reason': 'I am reminded how this shooting made an impact on the Madden community, a video game I have enjoyed in the past. '}, {'emotion': 'Sadness', 'intensity': '1', 'reason': "I feel sad because it invokes feelings about shootings, but it doesn't se…
988	Suspect in Madden 19 tournament shooting targeted gamers: Sheriff	anonymous-source/all_shooting_images_newest/201.jpg	[{'emotion': 'Fear', 'intensity': '3', 'reason': 'I am a gamer myself and I do go to game tournaments.'}, {'emotion': 'Sadness', 'intensity': '4', 'reason': 'I am disturbed that an individual would target their victims such as this.'}, {'emotion': 'Sadness', 'intensity': '3', 'reason': 'Shootings make me feel all these emotions. There is also no positive aspect of this event.'}, {'emotion': 'Fear…
992	No one deserves to die over a video game': survivors recall chaos of Florida shooting	anonymous-source/all_shooting_images_newest/494.jpg	[{'emotion': 'Sadness', 'intensity': '3', 'reason': 'what the title said was true.'}, {'emotion': 'Anger', 'intensity': '4', 'reason': 'I am angered at the shooter for committing their attack on innocent victims. '}, {'emotion': 'Sadness', 'intensity': '3', 'reason': "Death makes me sad and fearful. These emotions are intensified when it's needless."}, {'emotion': 'Sadness', 'intensity': '3', 're…
995	Mass shooting victims remembered at Thousand Oaks church service and memorial	anonymous-source/all_shooting_images_newest/110089.jpg	[{'emotion': 'Sadness', 'intensity': '3', 'reason': 'they did not deserved to pass away.'}, {'emotion': 'Sadness', 'intensity': '3', 'reason': 'I am sad to hear about the memorial services for yet another mass shooting event in our nation. '}, {'emotion': 'Sadness', 'intensity': '1', 'reason': 'The event itself makes me feel some contentment for the victims, but the event makes me primarily sad.'…
997	Jacksonville 'Madden' shooting: Gaming community and friends pay tribute to two victims	anonymous-source/all_shooting_images_newest/139.jpg	[{'emotion': 'Sadness', 'intensity': '3', 'reason': "it's sad that people would die over games tournaments."}, {'emotion': 'Sadness', 'intensity': '3', 'reason': 'I am saddened to hear about the details of the aftermath of the Jacksonville shooting. '}, {'emotion': 'Sadness', 'intensity': '2', 'reason': 'I am glad that the victims are honored, but the event itself makes me feel sad and disgusted'…
999	It s never going to be normal': California city in shock after gunman kills 12	anonymous-source/all_shooting_images_newest/110161.jpg	[{'emotion': 'Anger', 'intensity': '2', 'reason': 'someone was able to access a gun and kill 12 people with it, which is appalling and shocking'}, {'emotion': 'Sadness', 'intensity': '5', 'reason': 'I feel sad for all the lives lost and scared that this could happen anyone.'}, {'emotion': 'Sadness', 'intensity': '4', 'reason': 'sad how easily as 12 yr old kid is killed due to gun violence.'}, {'e…
1002	How 3-D printed guns are made and the growing security concerns they present	anonymous-source/all_shooting_images_newest/84.jpg	[{'emotion': 'Fear', 'intensity': '3', 'reason': "I am scared for my own life as well as the lives of others after reading this because these 3D printed guns might become an unregulated and easy way for anyone to produce and distribute dangerous weapons, meaning even more people might be in danger. I am angry because it seems like people are so protective of their second amendment rights that the…
1007	Ben Stiller, Amy Schumer and Other Hollywood Stars React to Great Tragedy of Pittsburgh Shooting	anonymous-source/all_shooting_images_newest/100052.jpg	[{'emotion': 'Sadness', 'intensity': '1', 'reason': 'Just hearing about a shooting makes me sad. I do not know how to feel about the fact that celebrities reacted because I do not know how they reacted, so I just feel sad that a shooting happened.'}, {'emotion': 'Sadness', 'intensity': '4', 'reason': 'I just feel so sad about so much gun violence and not so interested to hear what celebrities hav…
1016	Twitter Users Taunt NRA With 'Thoughts And Prayers'Amid Reports Of Financial Struggles	anonymous-source/all_shooting_images_newest/110475.jpg	[{'emotion': 'Amusement', 'intensity': '2', 'reason': "I think it's a very clever way to show people how bad the problem has gotten, how the NRA sucks in regards to gun control and how thoughts and prayers don't help and all that"}, {'emotion': 'Amusement', 'intensity': '4', 'reason': "I feel amused as I don't have that much sympathy for the NRA. "}, {'emotion': 'Amusement', 'intensity': '3', 're…
1017	Las Vegas pauses but looks ahead a year after mass shooting	anonymous-source/all_shooting_images_newest/100062.jpg	[{'emotion': 'Sadness', 'intensity': '2', 'reason': 'It mentions a mass shooting, which is saddening. '}, {'emotion': 'Sadness', 'intensity': '4', 'reason': 'I just feel sad as the Las Vegas shooting was horrible and just feel sad for the families for the victims. '}, {'emotion': 'Sadness', 'intensity': '3', 'reason': 'actions against mass shooting needs to be taken.'}, {'emotion': 'Contentment',…
1019	The Latest: Vegas shooting survivors form human chain	anonymous-source/all_shooting_images_newest/100381.jpg	[{'emotion': 'Contentment', 'intensity': '3', 'reason': 'survivors are connecting together to help each other.'}, {'emotion': 'Contentment', 'intensity': '4', 'reason': 'Seems like they are holding a powerful and emotional event. '}, {'emotion': 'Sadness', 'intensity': '3', 'reason': 'there were a lot of victims'}, {'emotion': 'Fear', 'intensity': '4', 'reason': 'Vegas shooting led to many death …
1021	Colorado school shooting victim's father accuses Giffords super PAC ad of 'politicizing' daughter's death	anonymous-source/all_shooting_images_newest/90402.jpg	[{'emotion': 'Sadness', 'intensity': '2', 'reason': 'the death of his daughter should be solved privately instead of making it policizing.'}, {'emotion': 'Amusement', 'intensity': '3', 'reason': "The title doesn't describe the situation super clearly. I want more context as to why he is being accused. "}, {'emotion': 'Excitement', 'intensity': '3', 'reason': 'more people are supporting gun contro…
1022	A Black Security Guard Caught a Shooting Suspect. Police Arrived and Killed the Guard.	anonymous-source/all_shooting_images_newest/110369.jpg	[{'emotion': 'Anger', 'intensity': '3', 'reason': 'it makes no sense for the police to kill the guard who protected the community.'}, {'emotion': 'Disgust', 'intensity': '5', 'reason': 'The guard seemingly did nothing wrong. '}, {'emotion': 'Anger', 'intensity': '3', 'reason': 'police is suppose to be the one who protect us, not killing people who protect us'}, {'emotion': 'Anger', 'intensity': '…
1031	A Republican Governor Shoots Himself in the Foot	anonymous-source/all_shooting_images_newest/90416.jpg	[{'emotion': 'Amusement', 'intensity': '2', 'reason': 'the news of shooting his own foot sounds surprised to me.'}, {'emotion': 'Awe', 'intensity': '4', 'reason': 'It provides no explanation as to why he shot his foot. Too short of a title. '}, {'emotion': 'Amusement', 'intensity': '3', 'reason': "that's what will happen when things are not under control"}, {'emotion': 'Anger', 'intensity': '1', …
1046	Commentary: We don t need gun control; we need another Great Awakening	anonymous-source/all_shooting_images_newest/10182.jpg	[{'emotion': 'Disgust', 'intensity': '4', 'reason': 'The headline focusing on a Great awakening freaks me out because of the religious fanaticism. '}, {'emotion': 'Disgust', 'intensity': '5', 'reason': 'We do need gun control '}, {'emotion': 'Disgust', 'intensity': '4', 'reason': 'this is just a horrible title with such a violent undertone! It\'s terrifying that people think a "great awakening" i…
1048	Dispute over 3D-printed guns raises many legal issues	anonymous-source/all_shooting_images_newest/131.jpg	[{'emotion': 'Amusement', 'intensity': '1', 'reason': 'News over the issue is a pretty neutral in the eyes of headlines and in my eyes. '}, {'emotion': 'Contentment', 'intensity': '4', 'reason': 'i am glad people are fighting against the 3D-printed guns '}, {'emotion': 'Fear', 'intensity': '1', 'reason': "I didn't know 3D printed guns were such a huge deal in the US and it's a little bit concerni…
1052	3D-printed guns: Judge blocks release of blueprints for firearms	anonymous-source/all_shooting_images_newest/405.jpg	[{'emotion': 'Excitement', 'intensity': '5', 'reason': 'Blocking the availability of guns is a good thing and that makes me happy. '}, {'emotion': 'Contentment', 'intensity': '3', 'reason': 'why did he block the release and what does that mean'}, {'emotion': 'Contentment', 'intensity': '3', 'reason': "It's good to not release the blueprints because the public shouldn't be promoted to be able to k…
1054	Accused Gunman in Capital Gazette Shooting Left a Trail of Conflicts	anonymous-source/all_shooting_images_newest/10651.jpg	[{'emotion': 'Sadness', 'intensity': '2', 'reason': "I don't fully understand this headline and what it is trying to say. "}, {'emotion': 'Disgust', 'intensity': '3', 'reason': 'confused on what this headline is saying'}, {'emotion': 'Fear', 'intensity': '1', 'reason': '"trail of conflicts" sounds problematic and concerning'}, {'emotion': 'Fear', 'intensity': '3', 'reason': 'I want to stay away f…
1055	What House Democrats can do about guns - CNNPolitics	anonymous-source/all_shooting_images_newest/110050.jpg	[{'emotion': 'Contentment', 'intensity': '1', 'reason': 'A run of the mill article, which can be seen as informative but not particularly swaying of my feelings. '}, {'emotion': 'Contentment', 'intensity': '3', 'reason': 'House Democrats can make a difference'}, {'emotion': 'Contentment', 'intensity': '3', 'reason': 'it just sounds like an educational piece about what house democrats can do about…
1056	Florida Didn't Conduct Gun Background Checks for a Year Because an Employee Couldn't Log In	anonymous-source/all_shooting_images_newest/10190.jpg	[{'emotion': 'Awe', 'intensity': '4', 'reason': 'The feeling comes down to me feeling "how could this have happened" and nothing much else. There was just lots of stupidity in the headline with nothing much to say. '}, {'emotion': 'Anger', 'intensity': '5', 'reason': 'this is outrageous. it should be illegal not to have Gun Background Checks '}, {'emotion': 'Fear', 'intensity': '4', 'reason': 'th…
1060	Texas Lt. Gov. Says Too Many Entrances Possibly To Blame In School Shooting	anonymous-source/all_shooting_images_newest/10625.jpg	[{'emotion': 'Anger', 'intensity': '3', 'reason': 'This is a pure excuse, not because the number of entrances proves the number of shootings'}, {'emotion': 'Anger', 'intensity': '4', 'reason': 'Students should not be allowed in these violent issues.'}, {'emotion': 'Anger', 'intensity': '3', 'reason': 'This is a pure excuse, not because the number of entrances proves the number of shootings'}, {'e…
1061	Montana Senate candidate accused of coordinating with NRA	anonymous-source/all_shooting_images_newest/90376.jpg	[{'emotion': 'Anger', 'intensity': '3', 'reason': 'Senators need to remain objective and rational, and such behavior is malfeasance'}, {'emotion': 'Anger', 'intensity': '4', 'reason': 'Governor should not be involved in these issues!'}, {'emotion': 'Anger', 'intensity': '3', 'reason': 'Senators need to remain objective and rational, and such behavior is malfeasance'}, {'emotion': 'Excitement', 'i…
1063	Citigroup restricts gun sales by business customers	anonymous-source/all_shooting_images_newest/10797.jpg	[{'emotion': 'Contentment', 'intensity': '3', 'reason': 'I support this initiative, the gun problem should be controlled from all sides'}, {'emotion': 'Contentment', 'intensity': '4', 'reason': "It's really understandable."}, {'emotion': 'Contentment', 'intensity': '3', 'reason': 'I support this initiative, the gun problem should be controlled from all sides'}, {'emotion': 'Excitement', 'intensit…
1067	Warriors coach fundraising for gun control Brady PAC	anonymous-source/all_shooting_images_newest/90128.jpg	[{'emotion': 'Contentment', 'intensity': '3', 'reason': 'Public figures should best lead by example, they need to call out the gun issue'}, {'emotion': 'Contentment', 'intensity': '4', 'reason': 'He seems to be really helpful.'}, {'emotion': 'Contentment', 'intensity': '3', 'reason': 'Public figures should best lead by example, they need to call out the gun issue'}, {'emotion': 'Excitement', 'int…
1071	Sociology professor shoots himself and police say he did it to protest Trump	anonymous-source/all_shooting_images_newest/90384.jpg	[{'emotion': 'Sadness', 'intensity': '3', 'reason': 'There is no need to give up your life for Trump, there are other ways to make a protest'}, {'emotion': 'Fear', 'intensity': '4', 'reason': 'He should cherish his life, and use a better way to protest.'}, {'emotion': 'Sadness', 'intensity': '3', 'reason': 'There is no need to give up your life for Trump, there are other ways to make a protest'},…
1074	March For Our Lives founder leaves the gun control movement and expresses one big regret	anonymous-source/all_shooting_images_newest/90297.jpg	[{'emotion': 'Sadness', 'intensity': '3', 'reason': 'We need more leaders like this to help people push for a gun ban'}, {'emotion': 'Sadness', 'intensity': '4', 'reason': "It's really regretful."}, {'emotion': 'Sadness', 'intensity': '3', 'reason': 'We need more leaders like this to help people push for a gun ban'}, {'emotion': 'Excitement', 'intensity': '3', 'reason': 'Excitement'}, {'emotion':…
1078	Mental Health Provider That Evaluated Nikolas Cruz Before Parkland Shooting To Service Florida Charter Schools	anonymous-source/all_shooting_images_newest/90131.jpg	[{'emotion': 'Fear', 'intensity': '2', 'reason': 'Because the mental health provider failed before it is risky now and is somewhat scary for the future'}, {'emotion': 'Fear', 'intensity': '3', 'reason': 'Why people will mental illness are allowed to carry guns?'}, {'emotion': 'Sadness', 'intensity': '3', 'reason': 'it reminded me of the terrible shooting that happened'}, {'emotion': 'Fear', 'inte…
1079	Cruz confronted by mother of Santa Fe shooting victim at rally	anonymous-source/all_shooting_images_newest/90164.jpg	[{'emotion': 'Sadness', 'intensity': '3', 'reason': "I feel sadness because it is very unfortunate that it has come to a situation like this and how many people Cruz's actions have hurt."}, {'emotion': 'Sadness', 'intensity': '3', 'reason': 'How are his feelings when facing these heart-broken mothers? Will these feeling influence his future behaviors? '}, {'emotion': 'Sadness', 'intensity': '3', …
1082	So Much Pain : A Police Family, Forever Changed by the Las Vegas Mass Shooting	anonymous-source/all_shooting_images_newest/100181.jpg	[{'emotion': 'Sadness', 'intensity': '4', 'reason': "It's sad because of how much pain the shooting has caused"}, {'emotion': 'Sadness', 'intensity': '3', 'reason': "sounds like a great loss to me. And it seems changed a lot of families' life. "}, {'emotion': 'Sadness', 'intensity': '2', 'reason': 'I thought of my family'}, {'emotion': 'Fear', 'intensity': '5', 'reason': 'I feel bad for them'}, {…
1086	New NRA President Oliver North Suggests All Iranians Are Liars	anonymous-source/all_shooting_images_newest/10647.jpg	[{'emotion': 'Disgust', 'intensity': '5', 'reason': 'it is a really xenophobic statement that is absolutely unacceptable for any high-profile person, and I would hope he gets backlash for it'}, {'emotion': 'Disgust', 'intensity': '3', 'reason': "sounds like the new president is a racist and I feel he's dangerous. "}, {'emotion': 'Disgust', 'intensity': '3', 'reason': 'that is a terrible thing to …
1090	Santorum suggests student activists learn CPR instead of protesting for gun control	anonymous-source/all_shooting_images_newest/10541.jpg	[{'emotion': 'Anger', 'intensity': '4', 'reason': "it's a nonsensical thing to say, since a gun is an extremely dangerous tool that just learning CPR often can't fix a wound from."}, {'emotion': 'Anger', 'intensity': '3', 'reason': 'Why? Does he think the campus gun control issue has been solved already? '}, {'emotion': 'Disgust', 'intensity': '3', 'reason': 'the students have every right to prot…
1094	School kids use #IfIDieInASchoolShooting to share thoughts on gun violence	anonymous-source/all_shooting_images_newest/10757.jpg	[{'emotion': 'Sadness', 'intensity': '2', 'reason': 'kids use this hashtag because of how frequently school shootings happen, which makes them really consider them as a possibility now.'}, {'emotion': 'Sadness', 'intensity': '4', 'reason': "I deeply feel the kids' worry about their safety on campus and I feel frustrated for my powerless of doing nothing and feel sorry for them. "}, {'emotion': 'S…
1095	Hundreds gather to honor Noel Sparks, killed in Thousand Oaks mass shooting	anonymous-source/all_shooting_images_newest/110263.jpg	[{'emotion': 'Sadness', 'intensity': '3', 'reason': 'sad because of the tragedy that happened'}, {'emotion': 'Sadness', 'intensity': '4', 'reason': 'sorry for the loss and hope no more similar tragedy happens again. '}, {'emotion': 'Sadness', 'intensity': '3', 'reason': 'it reminded me of the terrible shooting and its victims'}, {'emotion': 'Sadness', 'intensity': '4', 'reason': 'I feel bad for s…
1104	Families, friends gather as more loved ones are laid to rest in wake of school shooting	anonymous-source/all_shooting_images_newest/10825.jpg	[{'emotion': 'Sadness', 'intensity': '3', 'reason': 'there are many victims of gun violence.'}, {'emotion': 'Sadness', 'intensity': '5', 'reason': 'that is horrible that families and friends have to watch their loved ones get buried for a completely preventable cause. '}, {'emotion': 'Sadness', 'intensity': '3', 'reason': "it's disheartening to see the same thing over and over again with no chang…
1105	Alabama mall shooting: Family of black man killed by police officer on Thanksgiving hires civil rights lawyer	anonymous-source/all_shooting_images_newest/110138.jpg	[{'emotion': 'Sadness', 'intensity': '3', 'reason': 'gun causes violence.'}, {'emotion': 'Sadness', 'intensity': '4', 'reason': 'sounds racially motivated'}, {'emotion': 'Sadness', 'intensity': '3', 'reason': 'the consequences of no gun regulation is saddening.'}, {'emotion': 'Sadness', 'intensity': '1', 'reason': 'there is a black man that got killed and the family lose its loved one'}, {'emotio…
1115	Probe: Mercy Hospital gunman was 'disliked classmate'at fire academy, described as presenting himself in'perverted' way	anonymous-source/all_shooting_images_newest/110226.jpg	[{'emotion': 'Sadness', 'intensity': '3', 'reason': 'shooting crime may be also related to mental illness.'}, {'emotion': 'Anger', 'intensity': '5', 'reason': 'how was he able to get a gun'}, {'emotion': 'Fear', 'intensity': '3', 'reason': 'I can visualize the man in my head, which is scary and unsettling.'}, {'emotion': 'Sadness', 'intensity': '3', 'reason': "it's a sad story"}, {'emotion': 'Sad…
1118	Mom may have stopped school shooting by alerting police to harassing Facebook posts	anonymous-source/all_shooting_images_newest/100388.jpg	[{'emotion': 'Contentment', 'intensity': '3', 'reason': 'It is good that someone was able to recognize dangerous tendencies and managed to step up and do something about it. Hopefully something can be learned from this event.'}, {'emotion': 'Contentment', 'intensity': '4', 'reason': 'a school shooting may have been averted under the watchful eye of a mother.'}, {'emotion': 'Contentment', 'intensi…
1119	Family of youngest bar massacre victim: 'It's not about gun control'	anonymous-source/all_shooting_images_newest/110199.jpg	[{'emotion': 'Disgust', 'intensity': '1', 'reason': 'Then what is it about? The only other option is mental health.'}, {'emotion': 'Awe', 'intensity': '3', 'reason': 'I wonder how a gun shooting victim could say that gun control is not the cause.'}, {'emotion': 'Sadness', 'intensity': '3', 'reason': "I don't know why it's about gun control."}, {'emotion': 'Sadness', 'intensity': '4', 'reason': 'I…
1121	After Synagogue Shooting, New Jersey to Consider More Gun Restrictions	anonymous-source/all_shooting_images_newest/100053.jpg	[{'emotion': 'Awe', 'intensity': '2', 'reason': 'Trying something, even if it fails, could lead towards future success.'}, {'emotion': 'Contentment', 'intensity': '2', 'reason': 'New Jersey is considering greater gun control.'}, {'emotion': 'Contentment', 'intensity': '3', 'reason': "Why people don't restrict guns before shooting event."}, {'emotion': 'Excitement', 'intensity': '4', 'reason': 'I …
1124	Gaming community honors Jacksonville shooting victims on social media: 'Champions forever'	anonymous-source/all_shooting_images_newest/132.jpg	[{'emotion': 'Sadness', 'intensity': '1', 'reason': "I don't like how often people are lofted up with titles like champion, hero, etc. They were victims of a tragedy and we should do what we can to prevent it from happening again."}, {'emotion': 'Amusement', 'intensity': '1', 'reason': 'as a gamer myself, I am fascinated and wonder if anything of value was done on top of this message to support t…
1128	Black man's death: Questions remain in Alabama mall shooting	anonymous-source/all_shooting_images_newest/110233.jpg	[{'emotion': 'Sadness', 'intensity': '1', 'reason': 'It sucks that a shooting is a somewhat common headline.'}, {'emotion': 'Sadness', 'intensity': '5', 'reason': "a black man's life was lost in a mall shooting, again due to gun violence."}, {'emotion': 'Sadness', 'intensity': '3', 'reason': "I should wait for the truth from the police's investigation."}, {'emotion': 'Sadness', 'intensity': '4', …
1130	Kellyanne Conway cites 'anti-religiosity' in Pittsburgh shooting	anonymous-source/all_shooting_images_newest/100059.jpg	[{'emotion': 'Disgust', 'intensity': '1', 'reason': "It is possible, but since the headline states her name, this is likely her opinion rather than the confirmed motive, and she is no expert, so I don't have reason to put much weight on her opinion."}, {'emotion': 'Amusement', 'intensity': '1', 'reason': "I would like to hear more about 'anti-religiosity' and what it is."}, {'emotion': 'Contentme…
1134	Parkland Students Call Out Florida Politicians, NRA After Jacksonville Shooting: Enough of Your BS	anonymous-source/all_shooting_images_newest/156.jpg	[{'emotion': 'Contentment', 'intensity': '3', 'reason': "I appreciate when people call out all the BS that comes up in political discourse. Things like 'thoughts and prayers'."}, {'emotion': 'Excitement', 'intensity': '2', 'reason': "young people are pushing for change in gun control policies, and there is the use of 'BS' in the headline."}, {'emotion': 'Sadness', 'intensity': '3', 'reason': 'I d…
1139	DeVos may let schools buy guns with federal money	anonymous-source/all_shooting_images_newest/113.jpg	[{'emotion': 'Disgust', 'intensity': '5', 'reason': 'because these people are trying to defense violence with violence. and I believed it is incorrect '}, {'emotion': 'Disgust', 'intensity': '5', 'reason': 'Why are we fighting violence with violence'}, {'emotion': 'Fear', 'intensity': '4', 'reason': 'I felt scared reading this because it made me think about how schools are supposed to be safe pla…
1140	The President Is Pushing the Exact Conspiracies Cited by the Pittsburgh Shooter 5 Days After the Attack	anonymous-source/all_shooting_images_newest/110080.jpg	[{'emotion': 'Fear', 'intensity': '2', 'reason': 'it seemed that there are something really bad happening. also I am sad for people who had died during shooting\r\n'}, {'emotion': 'Disgust', 'intensity': '4', 'reason': 'Why is the president pushing conspiracies '}, {'emotion': 'Anger', 'intensity': '5', 'reason': 'it makes me incredibly angry to think that the president is pushing such misinforma…
1141	Students across America plan school walkout in support of second amendment	anonymous-source/all_shooting_images_newest/10639.jpg	[{'emotion': 'Excitement', 'intensity': '4', 'reason': 'I respect these people because they are fight for the concepts they believe are correct. it is exciting '}, {'emotion': 'Amusement', 'intensity': '4', 'reason': 'students are fighting against second amendment '}, {'emotion': 'Disgust', 'intensity': '3', 'reason': 'it makes me feel disgusted that my generation either is not educated about wha…
1153	The Las Vegas Strip Will Go Dark to Honor the Victims of Last Year's Mass Shooting	anonymous-source/all_shooting_images_newest/100021.jpg	[{'emotion': 'Sadness', 'intensity': '4', 'reason': 'I am very sad about the victims. Also I am glad that people are memorizing these victims with such methods '}, {'emotion': 'Sadness', 'intensity': '4', 'reason': "I wish we didn't have to honor victims of gun violence"}, {'emotion': 'Sadness', 'intensity': '3', 'reason': 'thinking about the victims of a mass shooting makes me feel sad'}, {'emot…
1156	Walmart is selling shotgun shell holiday lights and people on social media are not happy	anonymous-source/all_shooting_images_newest/110385.jpg	[{'emotion': 'Anger', 'intensity': '3', 'reason': "I am angry and confused why walmart are selling these things that trigger people's anger "}, {'emotion': 'Disgust', 'intensity': '3', 'reason': "It seems insensitive to sell something, like they don't have awareness to whats going on"}, {'emotion': 'Disgust', 'intensity': '3', 'reason': 'I do not see the point in this; in fact, I think it is heed…
1161	Judge blocks posting of online plans for 3D printed guns	anonymous-source/all_shooting_images_newest/271.jpg	[{'emotion': 'Contentment', 'intensity': '2', 'reason': 'We need all 3 branches to truly implement gun control'}, {'emotion': 'Disgust', 'intensity': '4', 'reason': 'we need to control guns'}, {'emotion': 'Sadness', 'intensity': '1', 'reason': "it is kind of an impediment on people's right to post whatever they want on the internet "}, {'emotion': 'Contentment', 'intensity': '4', 'reason': "U don…
1169	Republican and Democratic Lawmakers Get Facts Wrong on Gun Policy	anonymous-source/all_shooting_images_newest/10814.jpg	[{'emotion': 'Disgust', 'intensity': '2', 'reason': 'Lawmakers continue to be unable to do their jobs'}, {'emotion': 'Sadness', 'intensity': '3', 'reason': 'we need to control guns'}, {'emotion': 'Anger', 'intensity': '1', 'reason': 'both parties that essentially lead the US can even get the facts right about a policy they probably wrote'}, {'emotion': 'Fear', 'intensity': '4', 'reason': "if they…
1176	Federal Grand Jury Charges Pittsburgh Synagogue Shooter With Federal Hate Crimes	anonymous-source/all_shooting_images_newest/100335.jpg	[{'emotion': 'Amusement', 'intensity': '1', 'reason': 'Obviously. But what about future preventative measures?'}, {'emotion': 'Awe', 'intensity': '3', 'reason': 'we need to stop gun violence\r\n'}, {'emotion': 'Contentment', 'intensity': '1', 'reason': 'what that person did was most definitely a hate crime and it should be known as such'}, {'emotion': 'Contentment', 'intensity': '4', 'reason': 'j…
1180	Cuomo urges other states to hit NRA finances as group claims losses	anonymous-source/all_shooting_images_newest/247.jpg	[{'emotion': 'Contentment', 'intensity': '4', 'reason': 'NRA is not good for the restriction, so hit NRA finances will help for the human development and their safety. '}, {'emotion': 'Contentment', 'intensity': '4', 'reason': 'The NRA should be hit over and over.'}, {'emotion': 'Disgust', 'intensity': '1', 'reason': "I don't think there should be anything related to finance with gun violence. "}…
1184	Tragedy of grand scale': Victims remembered 1 year after Vegas shooting	anonymous-source/all_shooting_images_newest/100256.jpg	[{'emotion': 'Awe', 'intensity': '5', 'reason': 'it will be the big mourning process, and they should be remember, so i feel respectful of this. '}, {'emotion': 'Sadness', 'intensity': '4', 'reason': 'So many innocent people were killed.'}, {'emotion': 'Sadness', 'intensity': '3', 'reason': 'I feel sorry and sad for people who died in gun violence. And I hope there will be less gun violence in so…
1185	For Parkland students, reminders of deadly shooting are 'everywhere you go'	anonymous-source/all_shooting_images_newest/10548.jpg	[{'emotion': 'Sadness', 'intensity': '5', 'reason': 'why should students need to worried about this? they actually can enjoy their school life! Because of the gun violence, they need to live under fear, i feel so sorry about them. '}, {'emotion': 'Sadness', 'intensity': '4', 'reason': 'I imagine the shooting was all they could think about for a long time. '}, {'emotion': 'Sadness', 'intensity': '…
1187	Florida shooter a troubled loner with white supremacist ties	anonymous-source/all_shooting_images_newest/10073.jpg	[{'emotion': 'Sadness', 'intensity': '4', 'reason': 'i feel that he is so lonely, he could not really decide where he should hold his position. '}, {'emotion': 'Disgust', 'intensity': '4', 'reason': 'No excuses for someone like this.'}, {'emotion': 'Anger', 'intensity': '2', 'reason': "I feel angry about the discrimination of racism and also relating to gun violence. I don't think there should be…
1188	Shotgun-toting Manchin shoots anti-Obamacare lawsuit in new ad for re-election bid in West Virginia	anonymous-source/all_shooting_images_newest/90048.jpg	[{'emotion': 'Anger', 'intensity': '5', 'reason': 'i still think that person who oppose making the right decision are bad'}, {'emotion': 'Disgust', 'intensity': '4', 'reason': 'How could someone appose affordable healthcare?'}, {'emotion': 'Anger', 'intensity': '2', 'reason': "I don't think there should be any encouragement of gun-use in political election. "}, {'emotion': 'Fear', 'intensity': '3…
1191	Donald Trump Jr. and Kimberly Guilfoyle flaunt gun photos from Montana trip	anonymous-source/all_shooting_images_newest/110451.jpg	[{'emotion': 'Anger', 'intensity': '5', 'reason': 'they present like they ignore all the people who hurt by the gun violence. '}, {'emotion': 'Disgust', 'intensity': '4', 'reason': 'This is tone deaf. Guns only hurt.'}, {'emotion': 'Disgust', 'intensity': '2', 'reason': 'I think celebrities should not publicly support gun use because they have reputations in society, which may cause increase of g…
1192	California Tries New Tack on Gun Violence: Ammunition Control	anonymous-source/all_shooting_images_newest/90338.jpg	[{'emotion': 'Awe', 'intensity': '5', 'reason': 'i think this is a good way to reduce the gun violence, so i totally agree and respect this idea. '}, {'emotion': 'Contentment', 'intensity': '5', 'reason': 'Keep throwing things at the wall until something sticks.'}, {'emotion': 'Contentment', 'intensity': '4', 'reason': 'I think it is important to have gun control over the state because it could d…
1195	These high schoolers were tired of lawmakers' inaction. So, they wrote their own gun control legislation	anonymous-source/all_shooting_images_newest/10574.jpg	[{'emotion': 'Contentment', 'intensity': '5', 'reason': 'students are doing their best to contribute, to show their attitude for the gun violence. '}, {'emotion': 'Sadness', 'intensity': '2', 'reason': "These kids shouldn't have to be doing this."}, {'emotion': 'Contentment', 'intensity': '5', 'reason': "It is important to let the teenagers know the harms of gun violence. Thus, they won't use gun…
1203	Garden provides place to mourn Las Vegas shooting victims	anonymous-source/all_shooting_images_newest/90343.jpg	[{'emotion': 'Excitement', 'intensity': '3', 'reason': 'Excitement'}, {'emotion': 'Sadness', 'intensity': '2', 'reason': 'I felt sad that there are people died due to gun violence '}, {'emotion': 'Awe', 'intensity': '1', 'reason': 'Its about the "mourn of gun shooting" and it is not "gun shooting" event itself.'}, {'emotion': 'Sadness', 'intensity': '2', 'reason': 'sorry for the shooting victims …
1213	Faces Not Forgotten' honors young victims of gun violence in America	anonymous-source/all_shooting_images_newest/90387.jpg	[{'emotion': 'Excitement', 'intensity': '3', 'reason': 'Excitement'}, {'emotion': 'Sadness', 'intensity': '4', 'reason': 'I felt sad about these young victims. Also I am glad that they will never be forgotten '}, {'emotion': 'Sadness', 'intensity': '1', 'reason': 'It mentions about the young victims of gun shooting.'}, {'emotion': 'Sadness', 'intensity': '2', 'reason': 'feel sorry for the young v…
1214	Today's talker: Could 'mistreatment' of shooter justify Santa Fe killings?	anonymous-source/all_shooting_images_newest/10629.jpg	[{'emotion': 'Excitement', 'intensity': '3', 'reason': 'Excitement'}, {'emotion': 'Disgust', 'intensity': '4', 'reason': "How killing be correct? I don't understand. I am sad for all the people who are killed "}, {'emotion': 'Anger', 'intensity': '3', 'reason': 'the sentence looks sarcastic and unsatisfied.'}, {'emotion': 'Anger', 'intensity': '1', 'reason': 'mistreatment could not be an excuse f…
1215	Paul McCartney attends 'March For Our Lives': I lost my best friend to gun violence	anonymous-source/all_shooting_images_newest/10397.jpg	[{'emotion': 'Excitement', 'intensity': '3', 'reason': 'Excitement'}, {'emotion': 'Sadness', 'intensity': '5', 'reason': 'I felt extremely sad because some people lost their friend. I can imagine how sad it is. '}, {'emotion': 'Sadness', 'intensity': '3', 'reason': 'resonate with the phrase "lost my best friend."'}, {'emotion': 'Sadness', 'intensity': '3', 'reason': '"I lost my best friend to gun…
1218	Commentary: This is how common school shootings are in America	anonymous-source/all_shooting_images_newest/110476.jpg	[{'emotion': 'Sadness', 'intensity': '3', 'reason': "it's so sad that school shootings are common in America"}, {'emotion': 'Awe', 'intensity': '2', 'reason': 'not clearly explaining what happened in the headline'}, {'emotion': 'Sadness', 'intensity': '1', 'reason': 'it reveals shooting is not uncommon'}, {'emotion': 'Anger', 'intensity': '3', 'reason': 'the headline makes me angry because it tal…
1219	These Florida lawmakers accepted money from the National Rifle Association	anonymous-source/all_shooting_images_newest/10776.jpg	[{'emotion': 'Disgust', 'intensity': '4', 'reason': 'I am not a supporter of guns'}, {'emotion': 'Anger', 'intensity': '3', 'reason': 'getting money for gun could kill someone oneday'}, {'emotion': 'Anger', 'intensity': '3', 'reason': 'Some lawmakers do not follow the bottom line'}, {'emotion': 'Anger', 'intensity': '3', 'reason': 'the movement of money to silence or persuade people is frustratin…
1221	Homemade Guns Are a Much Bigger Threat Than 3D-Printed Firearms	anonymous-source/all_shooting_images_newest/180.jpg	[{'emotion': 'Fear', 'intensity': '4', 'reason': 'people are making guns at home'}, {'emotion': 'Fear', 'intensity': '3', 'reason': 'someone can shoot me when they can easily access to guns'}, {'emotion': 'Fear', 'intensity': '3', 'reason': 'gun can made home'}, {'emotion': 'Fear', 'intensity': '3', 'reason': 'the headline is scary because it implies the vast types of guns available for people '}…
1227	White Man Accused Of Pulling Gun On Muslim Teens At Minnesota McDonald s	anonymous-source/all_shooting_images_newest/110114.jpg	[{'emotion': 'Sadness', 'intensity': '5', 'reason': 'there is no need for guns in McDonalds'}, {'emotion': 'Fear', 'intensity': '4', 'reason': 'gunshot against weaker people makes me angry and I am worried if that can happen to me one day'}, {'emotion': 'Sadness', 'intensity': '1', 'reason': 'feel pity and sad for teens'}, {'emotion': 'Anger', 'intensity': '3', 'reason': 'the event is just disgus…
1229	Trump meets with families affected by Texas shooting, mother calls him 'toddler'	anonymous-source/all_shooting_images_newest/10777.jpg	[{'emotion': 'Anger', 'intensity': '3', 'reason': "Trump didn't help"}, {'emotion': 'Awe', 'intensity': '2', 'reason': 'want to know what made her call him a "toddler"\r\n'}, {'emotion': 'Amusement', 'intensity': '1', 'reason': 'Trump is like a toddler'}, {'emotion': 'Amusement', 'intensity': '3', 'reason': 'the last part of the headline was funny to me because it is such a harmless comment but a…
1231	Amazon bans the sale of a guidebook for 3D printing a gun	anonymous-source/all_shooting_images_newest/182.jpg	[{'emotion': 'Fear', 'intensity': '4', 'reason': 'why is that available?'}, {'emotion': 'Contentment', 'intensity': '2', 'reason': 'Amazon has done a right thing'}, {'emotion': 'Contentment', 'intensity': '3', 'reason': 'company do pro social action'}, {'emotion': 'Awe', 'intensity': '3', 'reason': 'it is a good change but I didnt expect it to happen. It is so simple yet effective toward trying t…
1233	After Santa Fe School Shooting, Texas Town Grapples With Bullying	anonymous-source/all_shooting_images_newest/10053.jpg	[{'emotion': 'Sadness', 'intensity': '4', 'reason': 'the Sante Fe shooting was devastating'}, {'emotion': 'Sadness', 'intensity': '4', 'reason': 'shooting students is not right and the shoot from children is always sad '}, {'emotion': 'Sadness', 'intensity': '2', 'reason': 'messy'}, {'emotion': 'Contentment', 'intensity': '3', 'reason': 'although the topic is sad as it is. It is good that they ar…
1247	Pittsburgh synagogue shooting suspect Robert Bowers pleads not guilty to federal hate crime charges	anonymous-source/all_shooting_images_newest/110396.jpg	[{'emotion': 'Anger', 'intensity': '5', 'reason': 'I cannot see how he cannot be guilty of hate crime charges when he literally went into a synagogue filled with Jewish people with the intent to kill them. In my opinion that is the definition of a hate crime. And events like this set precedents for future events of this kind, meaning that if another person where to go to a mosque or church, they …
1250	Trump Calls for Unity After Synagogue Shooting, Then Swiftly Denounces Democrats	anonymous-source/all_shooting_images_newest/100198.jpg	[{'emotion': 'Disgust', 'intensity': '4', 'reason': 'Trump has a major history of being a hypocrite and the fact that he does something like this does not surprise me. When you ask for unity, you cannot just exclude a whole group of people, that is not how unity works. '}, {'emotion': 'Contentment', 'intensity': '3', 'reason': "I don't care"}, {'emotion': 'Sadness', 'intensity': '3', 'reason': 'S…
1251	Shopify bans sales of some guns, weapons and ammunition	anonymous-source/all_shooting_images_newest/240.jpg	[{'emotion': 'Contentment', 'intensity': '4', 'reason': "This is a good start. First off I didn't even know that Shopify sold guns, but the fact that they did is a little scary. This means that almost anyone could just purchase a gun with little to no hassle. With this ban, it is a good step forward for how other sellers should respond. "}, {'emotion': 'Contentment', 'intensity': '3', 'reason': "…
1257	New Vermont law used to keep school shooting plot suspect from getting gun	anonymous-source/all_shooting_images_newest/10398.jpg	[{'emotion': 'Excitement', 'intensity': '4', 'reason': 'Excited for Laws that are able to get less shooters gun and hope that other states adopt it. '}, {'emotion': 'Contentment', 'intensity': '4', 'reason': 'this shows that the law is working.'}, {'emotion': 'Contentment', 'intensity': '4', 'reason': "Good that a law stopped a suspect from obtaining a gun. This law saved children's lives at Verm…
1262	Seattle gun storage law 'eminently reasonable,' judge says in tossing NRA, gun group's lawsuit	anonymous-source/all_shooting_images_newest/100240.jpg	[{'emotion': 'Awe', 'intensity': '1', 'reason': 'Not really sure what is being said here in this headline'}, {'emotion': 'Contentment', 'intensity': '4', 'reason': 'it shows proper investigation and education around the law.'}, {'emotion': 'Contentment', 'intensity': '4', 'reason': "Its good that the judge is tossing out the NRA's group lawsuit because it is unreasonable. "}, {'emotion': 'Content…
1270	Montana Gov. Steve Bullock says he 'would' support assault weapons ban	anonymous-source/all_shooting_images_newest/356.jpg	[{'emotion': 'Contentment', 'intensity': '5', 'reason': 'Happy that governors from less liberal states are also agreeing on banning assault weapons'}, {'emotion': 'Contentment', 'intensity': '4', 'reason': 'we need more voices in power like him.'}, {'emotion': 'Awe', 'intensity': '2', 'reason': 'Very interesting to see a governor from a republican state that they would support a assault weapons b…
1272	Someone could potentially get shot': Police warn people against buying gun-shaped phone case	anonymous-source/all_shooting_images_newest/100244.jpg	[{'emotion': 'Fear', 'intensity': '3', 'reason': 'Scared that police are basically threatening to shoot people with anything in their hands or pockets as it promotes police brutality and is inherently racist (will definitely shoot more of those with phone case that are black than white)'}, {'emotion': 'Disgust', 'intensity': '3', 'reason': 'the quote shows the police poking fun at a very serious …
1275	How to design a school in the era of mass shootings	anonymous-source/all_shooting_images_newest/382.jpg	[{'emotion': 'Awe', 'intensity': '1', 'reason': 'Hopeful to see what that would mean for a school and if it works to prevent gun shootings.'}, {'emotion': 'Anger', 'intensity': '4', 'reason': 'while it is necessary to adapt, these circumstances should not have to exist.'}, {'emotion': 'Awe', 'intensity': '4', 'reason': 'Im interested how you can design a school in the era of mass shootings. What …
1276	'Alarming' rise in eye injuries from BB, pellet and paintball guns in kids	anonymous-source/all_shooting_images_newest/10781.jpg	[{'emotion': 'Fear', 'intensity': '3', 'reason': 'Scared that children are given "toys" that are basically weapons and can injure those around them. '}, {'emotion': 'Anger', 'intensity': '4', 'reason': 'this fact in itself is heartbreaking.'}, {'emotion': 'Disgust', 'intensity': '4', 'reason': "Because these are preventable injuries. Children can't be playing with these weapons in the first place…
1282	Portland police arrest 4 and seize weapons as right-wing and anti-fascist protesters clash	anonymous-source/all_shooting_images_newest/486.jpg	[{'emotion': 'Contentment', 'intensity': '4', 'reason': 'Police prevented guns from escalating clash.'}, {'emotion': 'Sadness', 'intensity': '1', 'reason': 'The world is a chaotic place.'}, {'emotion': 'Excitement', 'intensity': '3', 'reason': "If the protests had been peaceful, there probably would not have been weapons floating around. It is not a bad thing for police to take people's weapons i…
1283	A Community Response to Mass Shooting Forum and Discussion	anonymous-source/all_shooting_images_newest/10663.jpg	[{'emotion': 'Excitement', 'intensity': '3', 'reason': 'There is a community opinion response on the mass shooting'}, {'emotion': 'Contentment', 'intensity': '1', 'reason': 'The headline seams to imply that people are taking the matter seriously and discussing what to do about it.'}, {'emotion': 'Contentment', 'intensity': '1', 'reason': 'The headline does not do a good job of summarizing the poi…
