# Supplementary material
Source: ML conference proceedings conference paper supplement (https://aclanthology.org/2022.aacl-main.29)
Supplement: Dataset [file 2022.aacl-main.29.Dataset.zip › NEmoP/NEmoP-Consensus/NEmoP-CR/NEmoP-CR-TI.csv]

	Headline	url	textimage_responses
7	Pittsburgh synagogue shooting: Portraits of the 11 victims	anonymous-source/all_shooting_images_newest/100385.jpg	[{'emotion': 'Sadness', 'intensity': '3', 'reason': 'people died because of hate crimes', 'url': 'anonymous-source/all_shooting_images_newest/100385.jpg'}, {'emotion': 'Sadness', 'intensity': '4', 'reason': 'I get sad seeing other people struggling or upset', 'url': 'anonymous-source/all_shooting_images_newest/100385.jpg'}, {'emotion': 'Sadness', 'intensity': '3', 'reason': 'this tragedy is sad',…
14	The shooting at a Madden video game tournament in Florida has shaken esports gamers and leagues in the fast-growing industry	anonymous-source/all_shooting_images_newest/12.jpg	[{'emotion': 'Sadness', 'intensity': '1', 'reason': "I don't care", 'url': 'anonymous-source/all_shooting_images_newest/12.jpg'}, {'emotion': 'Awe', 'intensity': '4', 'reason': 'the setting is pleasant so I feel relaxed ', 'url': 'anonymous-source/all_shooting_images_newest/12.jpg'}, {'emotion': 'Contentment', 'intensity': '3', 'reason': 'some industries shall get involved', 'url': 'anonymous-sou…
21	Doctors pay tribute to Chicago shooting victim Tamara O'Neal, MD:'We are so sorry we couldn't protect you'	anonymous-source/all_shooting_images_newest/110264.jpg	[{'emotion': 'Sadness', 'intensity': '3', 'reason': 'Saddened by the helplessness of this situation, while sympathizing with the person in the picture.', 'url': 'anonymous-source/all_shooting_images_newest/110264.jpg'}, {'emotion': 'Sadness', 'intensity': '3', 'reason': 'This sense of apology and guilt makes me feel sad and helpless.', 'url': 'anonymous-source/all_shooting_images_newest/110264.jp…
23	Bloomberg criticizes Trump after Pittsburgh shooting	anonymous-source/all_shooting_images_newest/100079.jpg	[{'emotion': 'Amusement', 'intensity': '3', 'reason': 'The headlines look like normal real-time commentary news, but the pictures look funny.', 'url': 'anonymous-source/all_shooting_images_newest/100079.jpg'}, {'emotion': 'Contentment', 'intensity': '3', 'reason': "it's the president's responsibility to think for the country's peace, but the numerous shooting cases show that people do not feel pe…
26	November 5 10:15 PM Rally brings together thousands in wake of deadly synagogue shooting	anonymous-source/all_shooting_images_newest/110416.jpg	[{'emotion': 'Fear', 'intensity': '3', 'reason': 'Sympathy for the victims and hope these things never happen again.', 'url': 'anonymous-source/all_shooting_images_newest/110416.jpg'}, {'emotion': 'Sadness', 'intensity': '3', 'reason': 'It is sad to realize the impact of guns on people of different races.', 'url': 'anonymous-source/all_shooting_images_newest/110416.jpg'}, {'emotion': 'Awe', 'inte…
27	Chicago police chief calls 58 shootings in 3 days 'tragic, senseless and cowardly'	anonymous-source/all_shooting_images_newest/259.jpg	[{'emotion': 'Anger', 'intensity': '3', 'reason': 'The picture shows what happened, the real situation is sad and scary.', 'url': 'anonymous-source/all_shooting_images_newest/259.jpg'}, {'emotion': 'Anger', 'intensity': '3', 'reason': 'I think it is irresponsible to judge the bad results after it happened.', 'url': 'anonymous-source/all_shooting_images_newest/259.jpg'}, {'emotion': 'Anger', 'inte…
28	Bank of America to stop lending to military-style weapons makers	anonymous-source/all_shooting_images_newest/10391.jpg	[{'emotion': 'Contentment', 'intensity': '3', 'reason': 'It is joyful and hopeful to see these positive actions.', 'url': 'anonymous-source/all_shooting_images_newest/10391.jpg'}, {'emotion': 'Contentment', 'intensity': '3', 'reason': 'I think it is a good trend.', 'url': 'anonymous-source/all_shooting_images_newest/10391.jpg'}, {'emotion': 'Anger', 'intensity': '3', 'reason': "I don't think bank…
34	Gun-related homicides, suicides kill more people than war, study says	anonymous-source/all_shooting_images_newest/126.jpg	[{'emotion': 'Fear', 'intensity': '3', 'reason': 'Terrified of this fact and terrified of the gun in the picture.', 'url': 'anonymous-source/all_shooting_images_newest/126.jpg'}, {'emotion': 'Sadness', 'intensity': '3', 'reason': 'It is sad to realize the bad, huge impact of guns on guns owners.', 'url': 'anonymous-source/all_shooting_images_newest/126.jpg'}, {'emotion': 'Sadness', 'intensity': '…
36	Gun Control Groups Eclipse N.R.A. in Election Spending	anonymous-source/all_shooting_images_newest/110462.jpg	[{'emotion': 'Contentment', 'intensity': '3', 'reason': "The people in the pictures seem to have so many different emotions that I can't get to the point.", 'url': 'anonymous-source/all_shooting_images_newest/110462.jpg'}, {'emotion': 'Contentment', 'intensity': '3', 'reason': 'this is a good trend.', 'url': 'anonymous-source/all_shooting_images_newest/110462.jpg'}, {'emotion': 'Contentment', 'in…
40	Who is Robert Bowers? Accused Pittsburgh synagogue shooter left anti-semitic trail	anonymous-source/all_shooting_images_newest/100500.jpg	[{'emotion': 'Disgust', 'intensity': '4', 'reason': "Not sure if they meant trial, but if so it's another white man who got away with murder and was not held accountable.", 'url': 'anonymous-source/all_shooting_images_newest/100500.jpg'}, {'emotion': 'Amusement', 'intensity': '2', 'reason': "His face just sticks out to me and the ways his eyes just stare into my soul makes me feel really self con…
41	A Black Security Guard Was Killed By Police As He Tried To Stop A Shooting	anonymous-source/all_shooting_images_newest/110335.jpg	[{'emotion': 'Anger', 'intensity': '5', 'reason': "It's frustrating see another black man getting shot by the police when he did nothing wrong. ", 'url': 'anonymous-source/all_shooting_images_newest/110335.jpg'}, {'emotion': 'Sadness', 'intensity': '3', 'reason': "It's sad to see heroes die. If the caption is true then this man died saving someone's life. It's just a tragedy, and I think sometime…
43	Trump Made False Claims About 9/11 to Justify Hosting a Rally After the Synagogue Shooting	anonymous-source/all_shooting_images_newest/100082.jpg	[{'emotion': 'Disgust', 'intensity': '5', 'reason': 'Trump takes shootings so lightly and he is clearly extremely selfish because all he cares about is himself and his rallies to support him.', 'url': 'anonymous-source/all_shooting_images_newest/100082.jpg'}, {'emotion': 'Sadness', 'intensity': '4', 'reason': "Trump has just done a lot of questionable things and he's definitely not been shown in …
44	Judge blocks distribution of 3D-printed gun blueprints until case is resolved	anonymous-source/all_shooting_images_newest/128.jpg	[{'emotion': 'Contentment', 'intensity': '4', 'reason': 'This makes me happy because for once someone is taking responsibility in gun control and taking the measures needed to keep people safe.', 'url': 'anonymous-source/all_shooting_images_newest/128.jpg'}, {'emotion': 'Amusement', 'intensity': '4', 'reason': "Printing guns, that's just crazy to me to see how the world has evolved. It's a cool t…
47	Police say Jacksonville shooter 'clearly targeted other gamers.' Here's what we know	anonymous-source/all_shooting_images_newest/386.jpg	[{'emotion': 'Disgust', 'intensity': '4', 'reason': 'Seeing someone specifically target a group of people in a shooting just shows they had a clear motive.', 'url': 'anonymous-source/all_shooting_images_newest/386.jpg'}, {'emotion': 'Fear', 'intensity': '2', 'reason': 'Shootings are just scary and I wonder what would happen if I was in that situation, it just makes me feel unsafe.', 'url': 'anony…
49	This Is Us' mourns Pittsburgh synagogue shooting victims in powerful message	anonymous-source/all_shooting_images_newest/100168.jpg	[{'emotion': 'Sadness', 'intensity': '4', 'reason': 'It sad to see a happy family in headlines of a shooting.', 'url': 'anonymous-source/all_shooting_images_newest/100168.jpg'}, {'emotion': 'Sadness', 'intensity': '5', 'reason': "What a beautiful family, and it's just sad to see them be gone. It's tragic and just absolutely disappointing for me to hear and see. They could have had such a bright a…
52	Trump s Stance on Guns Puts Pressure on Congress	anonymous-source/all_shooting_images_newest/10759.jpg	[{'emotion': 'Disgust', 'intensity': '4', 'reason': 'His stance on guns is to do nothing about it and as a person who has so much power it is concerning.', 'url': 'anonymous-source/all_shooting_images_newest/10759.jpg'}, {'emotion': 'Fear', 'intensity': '2', 'reason': 'Whenever Trump is putting pressure on anything, it just ', 'url': 'anonymous-source/all_shooting_images_newest/10759.jpg'}, {'emo…
56	Police change explanation again after killing black man they mistook for an active shooter	anonymous-source/all_shooting_images_newest/110502.jpg	[{'emotion': 'Anger', 'intensity': '5', 'reason': 'Police brutality in the country is such a large issue and it seems like the same instances are occurring over and over again with no change being made.', 'url': 'anonymous-source/all_shooting_images_newest/110502.jpg'}, {'emotion': 'Anger', 'intensity': '5', 'reason': "Why, how, and who could do this. It's a police officer's job to protect the pe…
57	3 drivers say man charged in 'stand your ground' shooting death threatened them	anonymous-source/all_shooting_images_newest/391.jpg	[{'emotion': 'Sadness', 'intensity': '4', 'reason': "It's so sad to see so many shooting happening around the country and innocent lives being lost because gun laws are not tighter.", 'url': 'anonymous-source/all_shooting_images_newest/391.jpg'}, {'emotion': 'Fear', 'intensity': '4', 'reason': "this could happen to any one at any time. Isn't that just crazy and scary. Am I ever safe? What do I do…
58	Delta, now entangled in controversy, says it sold just 13 tickets under NRA discount	anonymous-source/all_shooting_images_newest/10806.jpg	[{'emotion': 'Disgust', 'intensity': '4', 'reason': 'I fly with Delta a lot and it is making me reconsider supporting them because I did not know they supported the NRA.', 'url': 'anonymous-source/all_shooting_images_newest/10806.jpg'}, {'emotion': 'Awe', 'intensity': '3', 'reason': "I don't know what the NRA is, but I'm going to assume that it's a gun company. And I'm confused 13 tickets of what…
63	Trump's school safety commission would prefer if you didn't talk about gun control	anonymous-source/all_shooting_images_newest/278.jpg	[{'emotion': 'Anger', 'intensity': '3', 'reason': 'we need to mention gun control in everywhere especially in the schools, since there are a lot of young students there.', 'url': 'anonymous-source/all_shooting_images_newest/278.jpg'}, {'emotion': 'Amusement', 'intensity': '3', 'reason': "I think it's ridiculous not to reflect on the bad things that have happened.", 'url': 'anonymous-source/all_sh…
65	3D Printing Vs Gun Control: Navigating The Paradox Analysis	anonymous-source/all_shooting_images_newest/90478.jpg	[{'emotion': 'Excitement', 'intensity': '3', 'reason': 'I am curious about the result about the paradox.', 'url': 'anonymous-source/all_shooting_images_newest/90478.jpg'}, {'emotion': 'Contentment', 'intensity': '3', 'reason': "this kind of analysis would be helpful for people's understanding.", 'url': 'anonymous-source/all_shooting_images_newest/90478.jpg'}, {'emotion': 'Excitement', 'intensity'…
71	More than 20,000 Americans a year kill themselves with a gun. Alarmed gun sellers are joining the suicide prevention fight.	anonymous-source/all_shooting_images_newest/90109.jpg	[{'emotion': 'Sadness', 'intensity': '3', 'reason': 'I never thought that people will use a gun to suicide. But this do call for attention, that guns are too dangerous for people to hold by themselves.', 'url': 'anonymous-source/all_shooting_images_newest/90109.jpg'}, {'emotion': 'Sadness', 'intensity': '3', 'reason': 'The legal age for holding guns should be raised, and government should do the …
73	U.S. judge halts release of blueprints for 3-D printed guns	anonymous-source/all_shooting_images_newest/296.jpg	[{'emotion': 'Contentment', 'intensity': '3', 'reason': 'before the government come up with a better solution about gun control, they should pay no attention to 3D -print of guns anymore.', 'url': 'anonymous-source/all_shooting_images_newest/296.jpg'}, {'emotion': 'Contentment', 'intensity': '3', 'reason': 'I think this is a good trend.', 'url': 'anonymous-source/all_shooting_images_newest/296.jp…
74	Gun control advocates take their campaign to the state with more registered guns than any in the US - ABC News	anonymous-source/all_shooting_images_newest/110492.jpg	[{'emotion': 'Fear', 'intensity': '3', 'reason': 'a state with so man people holding guns by themselves makes people afraid.', 'url': 'anonymous-source/all_shooting_images_newest/110492.jpg'}, {'emotion': 'Contentment', 'intensity': '3', 'reason': 'I think this is good for public safety in the future.', 'url': 'anonymous-source/all_shooting_images_newest/110492.jpg'}, {'emotion': 'Fear', 'intensi…
78	School shootings will scar a generation of students	anonymous-source/all_shooting_images_newest/10732.jpg	[{'emotion': 'Sadness', 'intensity': '3', 'reason': 'it is true that students who experience or just witness a gun shoot will be badly influenced for his or her whole life. (PTSD)', 'url': 'anonymous-source/all_shooting_images_newest/10732.jpg'}, {'emotion': 'Sadness', 'intensity': '3', 'reason': 'I think this statement has become a reality.', 'url': 'anonymous-source/all_shooting_images_newest/1…
79	Michael Moore: NRA is a terrorist organization ; media should treat gun-rights group like ISIS	anonymous-source/all_shooting_images_newest/10671.jpg	[{'emotion': 'Contentment', 'intensity': '3', 'reason': 'it is true that gun shooting is not a good thing. but treat NRA as a terrorist organization is too exaggerate.', 'url': 'anonymous-source/all_shooting_images_newest/10671.jpg'}, {'emotion': 'Awe', 'intensity': '3', 'reason': "I think it's awe but somewhat a true that gun-rights group can threaten the public's safety.", 'url': 'anonymous-sou…
84	Massacre fatigue: Do we ignore shootings?	anonymous-source/all_shooting_images_newest/110491.jpg	[{'emotion': 'Contentment', 'intensity': '5', 'reason': 'we should have notice that long time ago. There are too many cases about gun violence. And we should have taken good attention about that', 'url': 'anonymous-source/all_shooting_images_newest/110491.jpg'}, {'emotion': 'Sadness', 'intensity': '3', 'reason': 'we should not ignore shootings, but we are. ', 'url': 'anonymous-source/all_shooting…
87	Video of Columbine Massacre Shown in School for Active Shooter Training	anonymous-source/all_shooting_images_newest/10508.jpg	[{'emotion': 'Fear', 'intensity': '5', 'reason': 'I am afraid something similar happened to me ', 'url': 'anonymous-source/all_shooting_images_newest/10508.jpg'}, {'emotion': 'Fear', 'intensity': '5', 'reason': 'the photo makes this situation even more real and I would be completely terrified. ', 'url': 'anonymous-source/all_shooting_images_newest/10508.jpg'}, {'emotion': 'Fear', 'intensity': '3'…
90	Robert Bowers: anti-Semite, anti-migrant and gun fanatic	anonymous-source/all_shooting_images_newest/100227.jpg	[{'emotion': 'Fear', 'intensity': '5', 'reason': 'Have a feelings that he would use guns to kill somebody', 'url': 'anonymous-source/all_shooting_images_newest/100227.jpg'}, {'emotion': 'Sadness', 'intensity': '3', 'reason': 'he seems to hate so many groups of minorities. ', 'url': 'anonymous-source/all_shooting_images_newest/100227.jpg'}, {'emotion': 'Disgust', 'intensity': '3', 'reason': 'that …
91	California bar massacre leaves another American community reeling after 12 gunned down by Marine veteran	anonymous-source/all_shooting_images_newest/110043.jpg	[{'emotion': 'Sadness', 'intensity': '3', 'reason': 'It is a sad news that somebody were killed by guns.', 'url': 'anonymous-source/all_shooting_images_newest/110043.jpg'}, {'emotion': 'Sadness', 'intensity': '5', 'reason': '12 lives were lost.', 'url': 'anonymous-source/all_shooting_images_newest/110043.jpg'}, {'emotion': 'Sadness', 'intensity': '4', 'reason': 'this is not okay', 'url': 'anonymo…
93	Brett Kavanaugh Claims He Grew Up in 'City Plagued By Gun Violence,' Is Full of It	anonymous-source/all_shooting_images_newest/90465.jpg	[{'emotion': 'Contentment', 'intensity': '4', 'reason': 'He might take actions to control gun violance', 'url': 'anonymous-source/all_shooting_images_newest/90465.jpg'}, {'emotion': 'Amusement', 'intensity': '1', 'reason': 'I\'m unaware if he actually grew up in a "city plagued by city violence." ', 'url': 'anonymous-source/all_shooting_images_newest/90465.jpg'}, {'emotion': 'Sadness', 'intensity…
95	California Today: Limiting Ammunition to Thwart Gun Violence	anonymous-source/all_shooting_images_newest/90059.jpg	[{'emotion': 'Contentment', 'intensity': '4', 'reason': 'the world will be better with less weapons', 'url': 'anonymous-source/all_shooting_images_newest/90059.jpg'}, {'emotion': 'Contentment', 'intensity': '4', 'reason': 'once again, this is the bare minimum. ', 'url': 'anonymous-source/all_shooting_images_newest/90059.jpg'}, {'emotion': 'Sadness', 'intensity': '3', 'reason': "Don't know enough …
96	As US midterms approach, moms hit the trail to preach gun control	anonymous-source/all_shooting_images_newest/100152.jpg	[{'emotion': 'Awe', 'intensity': '4', 'reason': 'everybody should take actions to fight gun violance', 'url': 'anonymous-source/all_shooting_images_newest/100152.jpg'}, {'emotion': 'Contentment', 'intensity': '4', 'reason': "I'm glad parents are worried enough to do this. ", 'url': 'anonymous-source/all_shooting_images_newest/100152.jpg'}, {'emotion': 'Fear', 'intensity': '3', 'reason': "Don't kn…
98	Angry over diversity in children's show, NRA TV depicts 'Thomas & Friends' in KKK hoods	anonymous-source/all_shooting_images_newest/90469.jpg	[{'emotion': 'Excitement', 'intensity': '1', 'reason': 'not very sure what this news is about', 'url': 'anonymous-source/all_shooting_images_newest/90469.jpg'}, {'emotion': 'Anger', 'intensity': '4', 'reason': 'it makes me question their thought process. ', 'url': 'anonymous-source/all_shooting_images_newest/90469.jpg'}, {'emotion': 'Sadness', 'intensity': '3', 'reason': "Don't know enough to ans…
99	Opinion | Schools Can Keep Kids Safe Without Giving Their Teachers Guns	anonymous-source/all_shooting_images_newest/90388.jpg	[{'emotion': 'Contentment', 'intensity': '3', 'reason': 'It is hard to tell whether it is good for teachers to have guns, but at least shools must have ways to protect students and teachers from gun violance', 'url': 'anonymous-source/all_shooting_images_newest/90388.jpg'}, {'emotion': 'Contentment', 'intensity': '3', 'reason': 'I agree with the statement. ', 'url': 'anonymous-source/all_shooting…
101	Trump Briefly Responds To Santa Fe School Shooting Before Pivoting	anonymous-source/all_shooting_images_newest/10120.jpg	[{'emotion': 'Disgust', 'intensity': '5', 'reason': 'The picture is uncomfortable to look and everything Trump did is disgusting.', 'url': 'anonymous-source/all_shooting_images_newest/10120.jpg'}, {'emotion': 'Disgust', 'intensity': '3', 'reason': 'trump wont say anything that doesnt disgust me', 'url': 'anonymous-source/all_shooting_images_newest/10120.jpg'}, {'emotion': 'Disgust', 'intensity': …
104	Gun manufacturer waited months to warn the public its pistol could fire when dropped	anonymous-source/all_shooting_images_newest/10354.jpg	[{'emotion': 'Anger', 'intensity': '3', 'reason': "Very irresponsible for them to do so. They're not just some normal manufacturers, they have to realize that they are creating weapons.", 'url': 'anonymous-source/all_shooting_images_newest/10354.jpg'}, {'emotion': 'Sadness', 'intensity': '3', 'reason': 'this is something that needed to have been disclosed beforehand', 'url': 'anonymous-source/all…
107	After California shooting, Democrats vow to tackle gun violence | Fox News	anonymous-source/all_shooting_images_newest/110511.jpg	[{'emotion': 'Anger', 'intensity': '3', 'reason': 'Legislators always have to wait for real harm to happen before trying to solve the problem', 'url': 'anonymous-source/all_shooting_images_newest/110511.jpg'}, {'emotion': 'Sadness', 'intensity': '3', 'reason': 'lives were lost', 'url': 'anonymous-source/all_shooting_images_newest/110511.jpg'}, {'emotion': 'Contentment', 'intensity': '3', 'reason'…
112	'We are a better city': Emotional mayor decries Chicago gun violence	anonymous-source/all_shooting_images_newest/19.jpg	[{'emotion': 'Sadness', 'intensity': '3', 'reason': "It's sad to see how people react to these tragedies but can't change the situation.", 'url': 'anonymous-source/all_shooting_images_newest/19.jpg'}, {'emotion': 'Sadness', 'intensity': '3', 'reason': 'lives werre lost', 'url': 'anonymous-source/all_shooting_images_newest/19.jpg'}, {'emotion': 'Sadness', 'intensity': '3', 'reason': 'What he said …
113	White male 'gun nuts' are 'biggest terrorist organization on the planet,' Tennessee Dem ally wrote online: report	anonymous-source/all_shooting_images_newest/100461.jpg	[{'emotion': 'Fear', 'intensity': '3', 'reason': 'Totally agree with the headline and feel angry with these gun nuts.', 'url': 'anonymous-source/all_shooting_images_newest/100461.jpg'}, {'emotion': 'Disgust', 'intensity': '3', 'reason': 'thats just wrong', 'url': 'anonymous-source/all_shooting_images_newest/100461.jpg'}, {'emotion': 'Sadness', 'intensity': '3', 'reason': 'People judge each other …
116	The Latest: Victim's family marks anniversary of shooting	anonymous-source/all_shooting_images_newest/90248.jpg	[{'emotion': 'Sadness', 'intensity': '4', 'reason': 'To feel sorry for those who died innocently, only family members will remember them forever and the pain will not go away.', 'url': 'anonymous-source/all_shooting_images_newest/90248.jpg'}, {'emotion': 'Sadness', 'intensity': '3', 'reason': 'that children were the victium of gun shooting', 'url': 'anonymous-source/all_shooting_images_newest/902…
118	MSNBC's Ruhle to Rubio: 'Step up and be a human' on gun control	anonymous-source/all_shooting_images_newest/10373.jpg	[{'emotion': 'Contentment', 'intensity': '5', 'reason': "It's brave for her to say something like this in a live broadcast.", 'url': 'anonymous-source/all_shooting_images_newest/10373.jpg'}, {'emotion': 'Contentment', 'intensity': '3', 'reason': 'she is right', 'url': 'anonymous-source/all_shooting_images_newest/10373.jpg'}, {'emotion': 'Awe', 'intensity': '3', 'reason': 'She is very brave to say…
119	Tamera Mowry Calls for Gun Control on 'The Real' After Niece Died in Thousand Oaks Shooting	anonymous-source/all_shooting_images_newest/110249.jpg	[{'emotion': 'Contentment', 'intensity': '3', 'reason': 'People are pointing out the key problem of gun violence: real control never happened.', 'url': 'anonymous-source/all_shooting_images_newest/110249.jpg'}, {'emotion': 'Sadness', 'intensity': '3', 'reason': 'sad because lives were lost', 'url': 'anonymous-source/all_shooting_images_newest/110249.jpg'}, {'emotion': 'Awe', 'intensity': '3', 're…
120	Suspect In Fatal Kroger Shooting First Tried To Get Inside Black Church: Police	anonymous-source/all_shooting_images_newest/100083.jpg	[{'emotion': 'Anger', 'intensity': '2', 'reason': 'He might be motivated by racism', 'url': 'anonymous-source/all_shooting_images_newest/100083.jpg'}, {'emotion': 'Disgust', 'intensity': '3', 'reason': 'sad', 'url': 'anonymous-source/all_shooting_images_newest/100083.jpg'}, {'emotion': 'Fear', 'intensity': '5', 'reason': 'It’s scary to think that someone can just walk into a place and decide to e…
123	California bans gun sales to people under 21	anonymous-source/all_shooting_images_newest/90321.jpg	[{'emotion': 'Contentment', 'intensity': '3', 'reason': 'I believe people under 21 should not be given firearms.', 'url': 'anonymous-source/all_shooting_images_newest/90321.jpg'}, {'emotion': 'Sadness', 'intensity': '3', 'reason': 'sad', 'url': 'anonymous-source/all_shooting_images_newest/90321.jpg'}, {'emotion': 'Anger', 'intensity': '3', 'reason': 'This statement makes me angry because this is …
129	Regulations for shooting in neighborhoods 'not going to happen overnight'	anonymous-source/all_shooting_images_newest/90006.jpg	[{'emotion': 'Sadness', 'intensity': '3', 'reason': 'It means that it will take a while for laws to be put in place', 'url': 'anonymous-source/all_shooting_images_newest/90006.jpg'}, {'emotion': 'Fear', 'intensity': '3', 'reason': 'fear', 'url': 'anonymous-source/all_shooting_images_newest/90006.jpg'}, {'emotion': 'Anger', 'intensity': '4', 'reason': 'Statements like these frustrates me. Obviousl…
130	Synagogue shooter 'listened to noise and noise told him his people were being slaughtered', says Jewish doctor who spoke to Robert Bowers	anonymous-source/all_shooting_images_newest/100086.jpg	[{'emotion': 'Disgust', 'intensity': '2', 'reason': "It's a poor excuse to shoot people.", 'url': 'anonymous-source/all_shooting_images_newest/100086.jpg'}, {'emotion': 'Excitement', 'intensity': '2', 'reason': 'happy', 'url': 'anonymous-source/all_shooting_images_newest/100086.jpg'}, {'emotion': 'Anger', 'intensity': '4', 'reason': 'This angers me because innocent are victims to these shootings.…
132	Wisconsin teens take anti-gun march to House Speaker Ryan's hometown	anonymous-source/all_shooting_images_newest/10592.jpg	[{'emotion': 'Excitement', 'intensity': '3', 'reason': "It's good to see the youth of today standing up for what they believe in.", 'url': 'anonymous-source/all_shooting_images_newest/10592.jpg'}, {'emotion': 'Contentment', 'intensity': '2', 'reason': 'happy', 'url': 'anonymous-source/all_shooting_images_newest/10592.jpg'}, {'emotion': 'Awe', 'intensity': '4', 'reason': 'It’s important for everyo…
133	New restrictions on gun ownership signed into law by California Gov. Jerry Brown, a Democrat	anonymous-source/all_shooting_images_newest/90326.jpg	[{'emotion': 'Contentment', 'intensity': '3', 'reason': 'Hopefully, other states will follow his lead', 'url': 'anonymous-source/all_shooting_images_newest/90326.jpg'}, {'emotion': 'Contentment', 'intensity': '2', 'reason': 'happy', 'url': 'anonymous-source/all_shooting_images_newest/90326.jpg'}, {'emotion': 'Contentment', 'intensity': '3', 'reason': 'I’m not sure what the new restrictions in reg…
139	Trump Hotel Event Shooting Threat Probed by Feds: Bloodstained MAGA Hats as Trophies	anonymous-source/all_shooting_images_newest/90051.jpg	[{'emotion': 'Fear', 'intensity': '3', 'reason': "It's terrifying to see such violent posts on social media", 'url': 'anonymous-source/all_shooting_images_newest/90051.jpg'}, {'emotion': 'Amusement', 'intensity': '3', 'reason': 'happy', 'url': 'anonymous-source/all_shooting_images_newest/90051.jpg'}, {'emotion': 'Fear', 'intensity': '3', 'reason': 'It’s scary to think that someone is going to kil…
140	Police: San Jose teacher suspected in road rage incident arrested in classroom with loaded gun	anonymous-source/all_shooting_images_newest/69.jpg	[{'emotion': 'Anger', 'intensity': '4', 'reason': "It is so danger to have a load gun in the classroom where there are a lot of students there. As a teacher, he's responsibility is not only to teach the students knowledge, but also including keep the students safe.", 'url': 'anonymous-source/all_shooting_images_newest/69.jpg'}, {'emotion': 'Fear', 'intensity': '2', 'reason': 'why is he smiling, h…
141	New York Today: Survivors of Gun Violence	anonymous-source/all_shooting_images_newest/10428.jpg	[{'emotion': 'Sadness', 'intensity': '2', 'reason': 'It is so lucky for this man to survive after shooting by a gun. This is one good thing. But it also makes me feel sad cause there are so many people who died because of gun. ', 'url': 'anonymous-source/all_shooting_images_newest/10428.jpg'}, {'emotion': 'Sadness', 'intensity': '2', 'reason': 'Sad to see the repercussions of gun violence\r\n', '…
161	Donald Trump says Second Amendment 'will never be repealed' following ex-Supreme Court judge's comments	anonymous-source/all_shooting_images_newest/10022.jpg	[{'emotion': 'Anger', 'intensity': '2', 'reason': 'One of the core problems that lies with gun control and violence is that there are laws and governmental rules that directly support people using guns etc. I feel helpless because of the use of language by Donald Trump saying that it will "NEVER" be repealed, which means that there will unlikely be positive changes in the future.', 'url': 'anonym…
162	Advocates warn against linking mass shootings, mental illness after Trump tweet	anonymous-source/all_shooting_images_newest/10826.jpg	[{'emotion': 'Disgust', 'intensity': '3', 'reason': "In some ways, the things that Donald Trump says are influential to what the general public may feel, but I do understand what the advocates are saying here since you can't really attribute everyone's emotions to a tweet by Trump. Despite so, I feel disgusted because I know there are probably people out there who might take his tweets the wrong …
163	Trump Suggests Armed Guard Could Have Stopped Pittsburgh Synagogue Shooting	anonymous-source/all_shooting_images_newest/100266.jpg	[{'emotion': 'Anger', 'intensity': '4', 'reason': 'Saying such a thing right now is useless because it has already happened. Even though I do not remember exactly what happened that stopped the mass murder from continuing, but if armed guards could\'ve "stopped" the shooting, then why didn\'t they stop it in the first place and let it happen? Saying something like this is just extremely insensiti…
170	Pittsburgh synagogue shooting suspect indicted on federal hate crime charges, faces 535 years	anonymous-source/all_shooting_images_newest/110518.jpg	[{'emotion': 'Contentment', 'intensity': '3', 'reason': "this guy got what he sowed. As an old saying once goes, you reap what you sow. I also find it slightly sad how even though he has caused so much sorrow during the mass shooting, he only needs to do 535 years, and it is likely that he will die before completing the whole sentence, therefore he couldn't truly live up to his sentence and pay f…
176	After Pittsburgh synagogue shooting, Squirrel Hill residents shaken but not surprised	anonymous-source/all_shooting_images_newest/100344.jpg	[{'emotion': 'Disgust', 'intensity': '4', 'reason': "saying a mass murder is not surprising is just way too insensitive. If it's not surprising then why didn't these people do anything in the first place to prevent it? If they have prevented it then many who have lost their lives could've very well been alive today, and to be this passive towards something that happens in your neighborhood, I'm t…
189	Ban assault weapons, buy them back, go after resisters: Ex-prosecutor in Congress	anonymous-source/all_shooting_images_newest/10883.jpg	[{'emotion': 'Fear', 'intensity': '3', 'reason': 'neutral about it', 'url': 'anonymous-source/all_shooting_images_newest/10883.jpg'}, {'emotion': 'Fear', 'intensity': '3', 'reason': 'gun violence might never end ', 'url': 'anonymous-source/all_shooting_images_newest/10883.jpg'}, {'emotion': 'Contentment', 'intensity': '3', 'reason': 'The most efficient way to avoid shooting cases is ban assault w…
193	As immigrants flow across US border, American guns go south	anonymous-source/all_shooting_images_newest/90158.jpg	[{'emotion': 'Fear', 'intensity': '3', 'reason': 'thats going to make it worse', 'url': 'anonymous-source/all_shooting_images_newest/90158.jpg'}, {'emotion': 'Fear', 'intensity': '3', 'reason': 'think of how many immigrants would actually die and their family and children in the US ', 'url': 'anonymous-source/all_shooting_images_newest/90158.jpg'}, {'emotion': 'Disgust', 'intensity': '3', 'reason…
204	Flap over funeral doves prompts arrest of California man, seizure of cache of guns and Nazi paraphernalia	anonymous-source/all_shooting_images_newest/110132.jpg	[{'emotion': 'Fear', 'intensity': '4', 'reason': 'So many dangerous weapons and what for?', 'url': 'anonymous-source/all_shooting_images_newest/110132.jpg'}, {'emotion': 'Fear', 'intensity': '5', 'reason': 'there are poeple out there having each multiple guns, why would they need more than one?', 'url': 'anonymous-source/all_shooting_images_newest/110132.jpg'}, {'emotion': 'Fear', 'intensity': '4…
206	Las Vegas shooting: Memorial events mark 1-year anniversary as massacre motive still shrouded in mystery	anonymous-source/all_shooting_images_newest/100424.jpg	[{'emotion': 'Contentment', 'intensity': '2', 'reason': "it's good to see people coming together at peace and love", 'url': 'anonymous-source/all_shooting_images_newest/100424.jpg'}, {'emotion': 'Sadness', 'intensity': '5', 'reason': 'innocent people died and they family have no comfort', 'url': 'anonymous-source/all_shooting_images_newest/100424.jpg'}, {'emotion': 'Sadness', 'intensity': '4', 'r…
207	Worried about gun violence, more than 20 Illinois schools install blue emergency boxes that notify police of an active shooter	anonymous-source/all_shooting_images_newest/90355.jpg	[{'emotion': 'Fear', 'intensity': '2', 'reason': "it's good to have these. It's just sad to see that we've fallen so far and low to this state of danger.", 'url': 'anonymous-source/all_shooting_images_newest/90355.jpg'}, {'emotion': 'Sadness', 'intensity': '5', 'reason': 'even though it is a good idea, it is sad that it happens so much that it is a need, they are kids.', 'url': 'anonymous-source/…
210	Security concerns come to light following shooting outside Mount Sinai Hospital	anonymous-source/all_shooting_images_newest/10023.jpg	[{'emotion': 'Sadness', 'intensity': '1', 'reason': "They're scared and lost and no one is safe.", 'url': 'anonymous-source/all_shooting_images_newest/10023.jpg'}, {'emotion': 'Disgust', 'intensity': '5', 'reason': 'they knew something could happen and still did nothing ', 'url': 'anonymous-source/all_shooting_images_newest/10023.jpg'}, {'emotion': 'Fear', 'intensity': '4', 'reason': 'a mass shoo…
211	Doctors rip Santorum for saying students should learn CPR instead of protesting gun violence	anonymous-source/all_shooting_images_newest/10406.jpg	[{'emotion': 'Amusement', 'intensity': '2', 'reason': 'every has their own argument and his argument is just funny.', 'url': 'anonymous-source/all_shooting_images_newest/10406.jpg'}, {'emotion': 'Anger', 'intensity': '5', 'reason': 'yes CPR is important, but there is a reason why students are protesting, they are kids who should be enjoying their childhood not be worried about dying in school.', …
213	Harwood Heights police conduct active shooter drill at Eisenhower library: 'You have to have a plan'	anonymous-source/all_shooting_images_newest/127.jpg	[{'emotion': 'Excitement', 'intensity': '4', 'reason': "Though we shouldn't have to do this, doing this helps to protect people and keep them safe.", 'url': 'anonymous-source/all_shooting_images_newest/127.jpg'}, {'emotion': 'Sadness', 'intensity': '4', 'reason': 'i am content that they are doing plans but it is sad that that is what they need to do.', 'url': 'anonymous-source/all_shooting_images…
217	School shooting threats, even when no guns are fired, can heighten anxiety among students	anonymous-source/all_shooting_images_newest/100349.jpg	[{'emotion': 'Anger', 'intensity': '4', 'reason': "Yes, and we as students should be put in these uncomfortable positions. We shouldn't be worrying about guns!", 'url': 'anonymous-source/all_shooting_images_newest/100349.jpg'}, {'emotion': 'Sadness', 'intensity': '5', 'reason': 'children should be in a safe environment for their education.', 'url': 'anonymous-source/all_shooting_images_newest/100…
220	A Mall Shooting, a Black Man s Death, and a Debate Over Race and Gun Rights	anonymous-source/all_shooting_images_newest/110088.jpg	[{'emotion': 'Contentment', 'intensity': '3', 'reason': 'The headline is very clear and rich.', 'url': 'anonymous-source/all_shooting_images_newest/110088.jpg'}, {'emotion': 'Sadness', 'intensity': '3', 'reason': 'black people are being killed for racial biases ', 'url': 'anonymous-source/all_shooting_images_newest/110088.jpg'}, {'emotion': 'Sadness', 'intensity': '3', 'reason': 'As a minority, I…
221	The Latest: Trump postpones Penn. rally after shooting	anonymous-source/all_shooting_images_newest/10654.jpg	[{'emotion': 'Sadness', 'intensity': '3', 'reason': 'The title focuses on two elements: trump and Fla. trip. And the subtitle gives one more element: school shooting. The president is going on vacation after a severe event which shows the president carelessness about the event.', 'url': 'anonymous-source/all_shooting_images_newest/10654.jpg'}, {'emotion': 'Disgust', 'intensity': '3', 'reason': "T…
222	NRA backs Manchin challenger Morrisey in W.Va. Senate race	anonymous-source/all_shooting_images_newest/90483.jpg	[{'emotion': 'Awe', 'intensity': '5', 'reason': 'People with power fighting each other is always attractive to readers. ', 'url': 'anonymous-source/all_shooting_images_newest/90483.jpg'}, {'emotion': 'Anger', 'intensity': '3', 'reason': "I don't agree with Morrisey's policies", 'url': 'anonymous-source/all_shooting_images_newest/90483.jpg'}, {'emotion': 'Disgust', 'intensity': '3', 'reason': "I d…
223	Blocked From Posting Printable Gun Plans, Activist Will Mail Them Instead	anonymous-source/all_shooting_images_newest/9.jpg	[{'emotion': 'Contentment', 'intensity': '3', 'reason': 'two elements are here: printable gun, activist. Printable gun means technology and activist stands for the people who are making changes. Technology makes gun more reachable and people are making such tech more real.', 'url': 'anonymous-source/all_shooting_images_newest/9.jpg'}, {'emotion': 'Fear', 'intensity': '5', 'reason': 'printable gun…
224	Federal judge overturns California s 95-year-old ban on handgun advertising	anonymous-source/all_shooting_images_newest/90118.jpg	[{'emotion': 'Fear', 'intensity': '4', 'reason': 'A women holding a handgun in the crew means dangerous which brings me fear. But in the headline, it shows the government is controlling such behavior.', 'url': 'anonymous-source/all_shooting_images_newest/90118.jpg'}, {'emotion': 'Fear', 'intensity': '3', 'reason': 'gun violence is being commercially advertised ', 'url': 'anonymous-source/all_shoo…
226	Let's hope the Salvador Castro Middle School shooting finally wakes up L.A. Unified on school safety	anonymous-source/all_shooting_images_newest/10641.jpg	[{'emotion': 'Sadness', 'intensity': '5', 'reason': 'The pic looks like a disaster. The headline shows LA people generally do not care about school safety.', 'url': 'anonymous-source/all_shooting_images_newest/10641.jpg'}, {'emotion': 'Awe', 'intensity': '4', 'reason': "although this is very sad news I'm hoping it'll be a wake up call for politicians ", 'url': 'anonymous-source/all_shooting_image…
230	After back-to-back mass shootings, America grows numb	anonymous-source/all_shooting_images_newest/110105.jpg	[{'emotion': 'Sadness', 'intensity': '4', 'reason': "The headline states the population is getting careless about the shooting but the pic is showing the victim's families or friends being sad for the shooting.", 'url': 'anonymous-source/all_shooting_images_newest/110105.jpg'}, {'emotion': 'Fear', 'intensity': '5', 'reason': "people shouldn't become desensitized to these shootings because there n…
233	A judge ruled that a website has to suspend downloads for 3D gun plans. But they're already out there	anonymous-source/all_shooting_images_newest/13.jpg	[{'emotion': 'Fear', 'intensity': '4', 'reason': 'Technology makes gun more reachable and people are making such tech more real. But the good side of this title is that the judge is seeing this.', 'url': 'anonymous-source/all_shooting_images_newest/13.jpg'}, {'emotion': 'Fear', 'intensity': '3', 'reason': "suspending these downloads aren't going to do much becuase the blueprints are already sprea…
234	Last Lockdown' statues part of gun-control group's plan to change minds in pro-gun districts	anonymous-source/all_shooting_images_newest/90135.jpg	[{'emotion': 'Fear', 'intensity': '2', 'reason': 'That title and the pic together deliver a message: there will be more gunfights generated.', 'url': 'anonymous-source/all_shooting_images_newest/90135.jpg'}, {'emotion': 'Fear', 'intensity': '5', 'reason': 'pro-gun districts are preventing changes in gun control laws', 'url': 'anonymous-source/all_shooting_images_newest/90135.jpg'}, {'emotion': 'F…
235	Gays Against Guns claims victory as FedEx ends NRA discount	anonymous-source/all_shooting_images_newest/100338.jpg	[{'emotion': 'Awe', 'intensity': '3', 'reason': "There is someone fighting against society to stop guns. That's good. That someone is gay, a minority which is in lack of rights about anything.", 'url': 'anonymous-source/all_shooting_images_newest/100338.jpg'}, {'emotion': 'Awe', 'intensity': '5', 'reason': 'different social cause groups are supporting gun control', 'url': 'anonymous-source/all_sh…
236	Waffle House shooting illustrates the danger posed by gun-free zones	anonymous-source/all_shooting_images_newest/10708.jpg	[{'emotion': 'Fear', 'intensity': '4', 'reason': 'It connects the shooting with danger and then connects these to gun-free zones. Gun-free zones = danger.', 'url': 'anonymous-source/all_shooting_images_newest/10708.jpg'}, {'emotion': 'Fear', 'intensity': '5', 'reason': 'people who are just going about their lives eating waffles can potentially be killed for no reason', 'url': 'anonymous-source/al…
239	3-D Printed Gun Blueprints Are Back, and Only New Laws Can Stop Them	anonymous-source/all_shooting_images_newest/299.jpg	[{'emotion': 'Fear', 'intensity': '5', 'reason': 'i am worried because anyone can have access to that information anywhere in the world. once the information is out there is no erasing it. this is dangerous as it concerns people building rather than buying. it is more difficult to control random objects used to build guns than actual guns ', 'url': 'anonymous-source/all_shooting_images_newest/299…
245	Teachers who survived shootings at Columbine, Sandy Hook, and Rancho Tehama discuss going back into the classroom.	anonymous-source/all_shooting_images_newest/90037.jpg	[{'emotion': 'Sadness', 'intensity': '5', 'reason': 'i am disappointed in the system and saddened at the trauma this education is facing.', 'url': 'anonymous-source/all_shooting_images_newest/90037.jpg'}, {'emotion': 'Awe', 'intensity': '3', 'reason': 'Seeing these people overcome their fears is inspiring ', 'url': 'anonymous-source/all_shooting_images_newest/90037.jpg'}, {'emotion': 'Sadness', '…
253	The Capital Gazette shooting and the limits of an assault weapons ban	anonymous-source/all_shooting_images_newest/10151.jpg	[{'emotion': 'Anger', 'intensity': '2', 'reason': 'another shooting occurring makes me sad. this headline also hints that it is going to weighs the cons of a weapon ban.', 'url': 'anonymous-source/all_shooting_images_newest/10151.jpg'}, {'emotion': 'Fear', 'intensity': '3', 'reason': 'I am scared of shootings', 'url': 'anonymous-source/all_shooting_images_newest/10151.jpg'}, {'emotion': 'Fear', '…
255	How We Mourned' memorializes Las Vegas mass shooting	anonymous-source/all_shooting_images_newest/90038.jpg	[{'emotion': 'Sadness', 'intensity': '3', 'reason': 'this should have never happened. innocent lives were lost.', 'url': 'anonymous-source/all_shooting_images_newest/90038.jpg'}, {'emotion': 'Sadness', 'intensity': '3', 'reason': 'The las vegas shooting was tragic', 'url': 'anonymous-source/all_shooting_images_newest/90038.jpg'}, {'emotion': 'Sadness', 'intensity': '5', 'reason': "the shooting sh…
256	Alabama mall shooting: Police admit they killed innocent black man by mistake as true Thanksgiving gunman remains at large	anonymous-source/all_shooting_images_newest/110505.jpg	[{'emotion': 'Anger', 'intensity': '3', 'reason': 'another victim of racial profiling. ', 'url': 'anonymous-source/all_shooting_images_newest/110505.jpg'}, {'emotion': 'Anger', 'intensity': '3', 'reason': 'The police had a racial bias', 'url': 'anonymous-source/all_shooting_images_newest/110505.jpg'}, {'emotion': 'Anger', 'intensity': '5', 'reason': 'they are disproportionately harsher on black m…
258	Kanye West donates $150,000 to family of black security guard killed by police after stopping gunman: report | TheHill	anonymous-source/all_shooting_images_newest/110137.jpg	[{'emotion': 'Awe', 'intensity': '3', 'reason': 'it is an incredibly kind gesture but alas it does not solve any problems. this should not take away from the issue at the center of the donation.', 'url': 'anonymous-source/all_shooting_images_newest/110137.jpg'}, {'emotion': 'Awe', 'intensity': '3', 'reason': 'I dont like kanye west but this is something nice', 'url': 'anonymous-source/all_shootin…
260	Lakers will honor victims of Thousand Oaks shooting at next home game	anonymous-source/all_shooting_images_newest/110373.jpg	[{'emotion': 'Sadness', 'intensity': '1', 'reason': "Can't relate", 'url': 'anonymous-source/all_shooting_images_newest/110373.jpg'}, {'emotion': 'Sadness', 'intensity': '3', 'reason': 'the man in the picture is crying', 'url': 'anonymous-source/all_shooting_images_newest/110373.jpg'}, {'emotion': 'Awe', 'intensity': '3', 'reason': 'it is a nice action but still sad', 'url': 'anonymous-source/all…
262	Piers Morgan Turns On 'Coward' Trump, Tells Him To 'Grow A Pair' On Gun Control	anonymous-source/all_shooting_images_newest/100106.jpg	[{'emotion': 'Amusement', 'intensity': '1', 'reason': 'The conflict reads funny', 'url': 'anonymous-source/all_shooting_images_newest/100106.jpg'}, {'emotion': 'Fear', 'intensity': '3', 'reason': 'everything is neutral', 'url': 'anonymous-source/all_shooting_images_newest/100106.jpg'}, {'emotion': 'Amusement', 'intensity': '3', 'reason': 'when did politicians became so unprofessional', 'url': 'an…
263	Judge blocks release of 3D-printed gun plans one day after Jacksonville Madden shooting	anonymous-source/all_shooting_images_newest/162.jpg	[{'emotion': 'Fear', 'intensity': '1', 'reason': "The picture doesn't look dangerous", 'url': 'anonymous-source/all_shooting_images_newest/162.jpg'}, {'emotion': 'Contentment', 'intensity': '3', 'reason': 'its good to see judge blocked the release of 3d print gun plans', 'url': 'anonymous-source/all_shooting_images_newest/162.jpg'}, {'emotion': 'Contentment', 'intensity': '3', 'reason': 'as they …
266	Jacksonville councilman on shooting: We've got a problem with guns and faith	anonymous-source/all_shooting_images_newest/412.jpg	[{'emotion': 'Sadness', 'intensity': '1', 'reason': 'not sure about the word faith', 'url': 'anonymous-source/all_shooting_images_newest/412.jpg'}, {'emotion': 'Sadness', 'intensity': '3', 'reason': 'sad to connect the word faith with gun', 'url': 'anonymous-source/all_shooting_images_newest/412.jpg'}, {'emotion': 'Sadness', 'intensity': '3', 'reason': 'bc is the reality', 'url': 'anonymous-sourc…
270	The World Moves On And You Don t. Parents Who Lost Children in School Shootings Find Comfort in a Group No One Wants to Join	anonymous-source/all_shooting_images_newest/110437.jpg	[{'emotion': 'Sadness', 'intensity': '1', 'reason': 'the tone of the picture looks sad', 'url': 'anonymous-source/all_shooting_images_newest/110437.jpg'}, {'emotion': 'Sadness', 'intensity': '3', 'reason': 'it is sad to lose kids and people in the picture seem sad', 'url': 'anonymous-source/all_shooting_images_newest/110437.jpg'}, {'emotion': 'Sadness', 'intensity': '3', 'reason': 'it is not fair…
274	Image Firearms Industry Appears Stuck in the Doldrums Interest in hunting products at Dick s Sporting Goods is sliding, background checks for firearms fell on Black Friday and pressure from Wall Street isn t letting up. By Tiffany Hsu	anonymous-source/all_shooting_images_newest/110267.jpg	[{'emotion': 'Fear', 'intensity': '1', 'reason': 'feel nothing special actually', 'url': 'anonymous-source/all_shooting_images_newest/110267.jpg'}, {'emotion': 'Fear', 'intensity': '1', 'reason': 'the picture is scary with too many guns', 'url': 'anonymous-source/all_shooting_images_newest/110267.jpg'}, {'emotion': 'Fear', 'intensity': '3', 'reason': 'fire arms should not get easier to access', '…
275	Parkland survivors keep memory of shooting alive	anonymous-source/all_shooting_images_newest/10004.jpg	[{'emotion': 'Sadness', 'intensity': '1', 'reason': 'although the picture is colorful, the headline and the story it tells is sad', 'url': 'anonymous-source/all_shooting_images_newest/10004.jpg'}, {'emotion': 'Contentment', 'intensity': '1', 'reason': 'it is good to see people remembering the deaths and all the hearts in the pic are really cute', 'url': 'anonymous-source/all_shooting_images_newes…
280	Giffords, Nevada Democrats meet 1 year after Vegas shooting	anonymous-source/all_shooting_images_newest/100174.jpg	[{'emotion': 'Fear', 'intensity': '3', 'reason': 'the picture makes me feel sad', 'url': 'anonymous-source/all_shooting_images_newest/100174.jpg'}, {'emotion': 'Fear', 'intensity': '3', 'reason': 'fear', 'url': 'anonymous-source/all_shooting_images_newest/100174.jpg'}, {'emotion': 'Sadness', 'intensity': '4', 'reason': "It's awful that these people have to experience such sad times and deep emoti…
285	Hillary Clinton, gun-control groups, lawmakers unite on fundraiser for 'NR8' candidates	anonymous-source/all_shooting_images_newest/90202.jpg	[{'emotion': 'Excitement', 'intensity': '1', 'reason': 'people in the picture are excited about this issue', 'url': 'anonymous-source/all_shooting_images_newest/90202.jpg'}, {'emotion': 'Amusement', 'intensity': '3', 'reason': 'happy', 'url': 'anonymous-source/all_shooting_images_newest/90202.jpg'}, {'emotion': 'Excitement', 'intensity': '4', 'reason': "I'm glad people are standing up against gun…
289	Man found guilty of firing gun at black teen who knocked on his door to ask for directions	anonymous-source/all_shooting_images_newest/100160.jpg	[{'emotion': 'Disgust', 'intensity': '3', 'reason': 'The headline makes me feel sad', 'url': 'anonymous-source/all_shooting_images_newest/100160.jpg'}, {'emotion': 'Awe', 'intensity': '3', 'reason': 'awe', 'url': 'anonymous-source/all_shooting_images_newest/100160.jpg'}, {'emotion': 'Sadness', 'intensity': '4', 'reason': 'Why would anyone feel the need to use a gun in this setting', 'url': 'anony…
290	Looking back at the Las Vegas mass shooting Photos	anonymous-source/all_shooting_images_newest/100284.jpg	[{'emotion': 'Sadness', 'intensity': '3', 'reason': 'The picture is lonely', 'url': 'anonymous-source/all_shooting_images_newest/100284.jpg'}, {'emotion': 'Anger', 'intensity': '3', 'reason': 'anger', 'url': 'anonymous-source/all_shooting_images_newest/100284.jpg'}, {'emotion': 'Sadness', 'intensity': '5', 'reason': "It's so horrible that such an awful thing happened to so many innocent people. "…
292	Santa Fe High School Shooting Victim s Mother Confronts Ted Cruz at Town Hall: Don t Disrespect My Daughter	anonymous-source/all_shooting_images_newest/90369.jpg	[{'emotion': 'Sadness', 'intensity': '1', 'reason': 'Their facial expression makes me feel serious ', 'url': 'anonymous-source/all_shooting_images_newest/90369.jpg'}, {'emotion': 'Sadness', 'intensity': '3', 'reason': 'sad', 'url': 'anonymous-source/all_shooting_images_newest/90369.jpg'}, {'emotion': 'Sadness', 'intensity': '4', 'reason': "It's so horrible that a man had to experience the death o…
296	Florida Shooting Suspect Nikolas Cruz Called Himself 'Annihilator' in Social Media Posts and Was Obsessed with Guns	anonymous-source/all_shooting_images_newest/10181.jpg	[{'emotion': 'Amusement', 'intensity': '3', 'reason': 'no feeling', 'url': 'anonymous-source/all_shooting_images_newest/10181.jpg'}, {'emotion': 'Contentment', 'intensity': '3', 'reason': 'happy', 'url': 'anonymous-source/all_shooting_images_newest/10181.jpg'}, {'emotion': 'Disgust', 'intensity': '4', 'reason': 'Why was this man allowed the possession of a gun', 'url': 'anonymous-source/all_shoot…
300	Tense moments as community meets after funeral ambush: 'Your church has had many shootings'	anonymous-source/all_shooting_images_newest/100135.jpg	[{'emotion': 'Sadness', 'intensity': '2', 'reason': 'I just think it is a group of guy want to these funeral, they look pretty sad', 'url': 'anonymous-source/all_shooting_images_newest/100135.jpg'}, {'emotion': 'Disgust', 'intensity': '3', 'reason': 'The first feeling I got was disgust as judging from these images, the main community affected was the African American Community. This type of targe…
302	California governor signs gun control bills into law	anonymous-source/all_shooting_images_newest/90335.jpg	[{'emotion': 'Awe', 'intensity': '2', 'reason': 'i am pretty suprise and glad that there is someone in the U.S government is "normal", and think gun control is important. ', 'url': 'anonymous-source/all_shooting_images_newest/90335.jpg'}, {'emotion': 'Amusement', 'intensity': '4', 'reason': "The first emotion I felt was amusement as stereotypically of course it's California that is putting out mo…
306	Thousand Oaks shooter is the textbook example of white privilege	anonymous-source/all_shooting_images_newest/110515.jpg	[{'emotion': 'Sadness', 'intensity': '3', 'reason': "I don't know any connection between the image and tex, feel the title is a bit inflammatory", 'url': 'anonymous-source/all_shooting_images_newest/110515.jpg'}, {'emotion': 'Anger', 'intensity': '3', 'reason': 'The first response I had from this is anger as I feel that main stream medias of today throw around the white privilege in every news ar…
319	This is a very dangerous person,' says lawyer who represented harassment victim of Maryland gunman	anonymous-source/all_shooting_images_newest/10561.jpg	[{'emotion': 'Fear', 'intensity': '3', 'reason': 'he is a bad dude who did bad things', 'url': 'anonymous-source/all_shooting_images_newest/10561.jpg'}, {'emotion': 'Fear', 'intensity': '5', 'reason': "I'm afraid that gunmen like this one would come to a place where I am and other school settings", 'url': 'anonymous-source/all_shooting_images_newest/10561.jpg'}, {'emotion': 'Amusement', 'intensit…
323	Officials across the country fear a new era of untraceable firearms	anonymous-source/all_shooting_images_newest/21.jpg	[{'emotion': 'Fear', 'intensity': '3', 'reason': 'untraceable firearms could be a huge issue for everyone', 'url': 'anonymous-source/all_shooting_images_newest/21.jpg'}, {'emotion': 'Fear', 'intensity': '5', 'reason': "i'm afraid of untraceable guns", 'url': 'anonymous-source/all_shooting_images_newest/21.jpg'}, {'emotion': 'Awe', 'intensity': '3', 'reason': 'a', 'url': 'anonymous-source/all_shoo…
324	Small gun shop that sold weapon to alleged Florida high school shooter 'closes indefinitely'	anonymous-source/all_shooting_images_newest/10087.jpg	[{'emotion': 'Contentment', 'intensity': '3', 'reason': 'they failed and that led to lots of lives lost, so them closing is universally a good thing', 'url': 'anonymous-source/all_shooting_images_newest/10087.jpg'}, {'emotion': 'Excitement', 'intensity': '3', 'reason': 'people are acting out against gun violence', 'url': 'anonymous-source/all_shooting_images_newest/10087.jpg'}, {'emotion': 'Amuse…
326	The deadly peril of not enforcing gun laws	anonymous-source/all_shooting_images_newest/100399.jpg	[{'emotion': 'Sadness', 'intensity': '3', 'reason': 'the results of failed gun control', 'url': 'anonymous-source/all_shooting_images_newest/100399.jpg'}, {'emotion': 'Sadness', 'intensity': '5', 'reason': "i'm devastated that so many people die from gun violence every year", 'url': 'anonymous-source/all_shooting_images_newest/100399.jpg'}, {'emotion': 'Excitement', 'intensity': '3', 'reason': 'a…
330	Gaming community and friends mourn Jacksonville shooting victims	anonymous-source/all_shooting_images_newest/112.jpg	[{'emotion': 'Sadness', 'intensity': '3', 'reason': 'a person was lost do to the actions of a gunmen', 'url': 'anonymous-source/all_shooting_images_newest/112.jpg'}, {'emotion': 'Sadness', 'intensity': '5', 'reason': "upset and sad because mourning continues but laws don't change", 'url': 'anonymous-source/all_shooting_images_newest/112.jpg'}, {'emotion': 'Awe', 'intensity': '3', 'reason': 'a', '…
331	Trump visits Florida hospital after school shooting	anonymous-source/all_shooting_images_newest/10343.jpg	[{'emotion': 'Contentment', 'intensity': '3', 'reason': 'even though he is garbage it was nice he visited, but still a garbage PR move that was only done in that regard. so i guess it sucks but thats not an option', 'url': 'anonymous-source/all_shooting_images_newest/10343.jpg'}, {'emotion': 'Anger', 'intensity': '5', 'reason': 'Trump did nothing to stop gun violence', 'url': 'anonymous-source/al…
333	NH cops shot by mentally ill man sue gun shop that sold him gun	anonymous-source/all_shooting_images_newest/45.jpg	[{'emotion': 'Sadness', 'intensity': '3', 'reason': 'sad because this ended up happening', 'url': 'anonymous-source/all_shooting_images_newest/45.jpg'}, {'emotion': 'Fear', 'intensity': '5', 'reason': 'In some places there is so little background checking to buy a gun', 'url': 'anonymous-source/all_shooting_images_newest/45.jpg'}, {'emotion': 'Anger', 'intensity': '2', 'reason': 'a', 'url': 'anon…
343	Florida lawmakers pass bill that would allow school staff to carry guns	anonymous-source/all_shooting_images_newest/10093.jpg	[{'emotion': 'Sadness', 'intensity': '4', 'reason': "This is sad because as long as guns aren't going away, this may be necessary.", 'url': 'anonymous-source/all_shooting_images_newest/10093.jpg'}, {'emotion': 'Fear', 'intensity': '3', 'reason': 'More guns in schools is the opposite of what needs to happen', 'url': 'anonymous-source/all_shooting_images_newest/10093.jpg'}, {'emotion': 'Fear', 'int…
347	Threat of Shootings Turns School Security Into a Growth Industry	anonymous-source/all_shooting_images_newest/10766.jpg	[{'emotion': 'Sadness', 'intensity': '4', 'reason': 'This is the natural conclusion when no one is addressing guns directly.', 'url': 'anonymous-source/all_shooting_images_newest/10766.jpg'}, {'emotion': 'Sadness', 'intensity': '3', 'reason': "This shouldn't be happening", 'url': 'anonymous-source/all_shooting_images_newest/10766.jpg'}, {'emotion': 'Sadness', 'intensity': '5', 'reason': 'the imag…
351	New York tightens gun restrictions for domestic abusers	anonymous-source/all_shooting_images_newest/10271.jpg	[{'emotion': 'Disgust', 'intensity': '4', 'reason': 'It reveals how deep the problem is when this is treated as newsworthy.', 'url': 'anonymous-source/all_shooting_images_newest/10271.jpg'}, {'emotion': 'Contentment', 'intensity': '3', 'reason': 'These laws need to be tightened ', 'url': 'anonymous-source/all_shooting_images_newest/10271.jpg'}, {'emotion': 'Contentment', 'intensity': '2', 'reason…
353	Nashville mayor demands stricter gun control after Waffle House shooting	anonymous-source/all_shooting_images_newest/10122.jpg	[{'emotion': 'Sadness', 'intensity': '4', 'reason': 'We have seen hundreds and hundreds of identical headlines to this over the last few years.', 'url': 'anonymous-source/all_shooting_images_newest/10122.jpg'}, {'emotion': 'Awe', 'intensity': '3', 'reason': 'It is a southern mayor taking a stand against gun laws', 'url': 'anonymous-source/all_shooting_images_newest/10122.jpg'}, {'emotion': 'Conte…
355	Gun control laws could work, even if they re hard to enforce	anonymous-source/all_shooting_images_newest/10377.jpg	[{'emotion': 'Anger', 'intensity': '4', 'reason': "It annoys me because we all already know that gun control laws could work, we just don't pass them.", 'url': 'anonymous-source/all_shooting_images_newest/10377.jpg'}, {'emotion': 'Contentment', 'intensity': '3', 'reason': 'Maybe some people are starting to see the importance in gun laws', 'url': 'anonymous-source/all_shooting_images_newest/10377.…
357	Poll: most US teens are worried that a shooting could happen at their school	anonymous-source/all_shooting_images_newest/10820.jpg	[{'emotion': 'Fear', 'intensity': '4', 'reason': 'The results of the poll are completely understandable and logical and it make me afraid to someday have kids of my own.', 'url': 'anonymous-source/all_shooting_images_newest/10820.jpg'}, {'emotion': 'Sadness', 'intensity': '3', 'reason': 'Because I often worry about school shootings and it is a horrible way to go through life', 'url': 'anonymous-s…
365	Guns found at 2 schools, threats reported at 3 schools near Santa Fe High School on 1st day back after mass shooting	anonymous-source/all_shooting_images_newest/10157.jpg	[{'emotion': 'Sadness', 'intensity': '3', 'reason': 'I think it is irresponsible to check the issue after it happened.', 'url': 'anonymous-source/all_shooting_images_newest/10157.jpg'}, {'emotion': 'Fear', 'intensity': '3', 'reason': 'School shootings are extremely common', 'url': 'anonymous-source/all_shooting_images_newest/10157.jpg'}, {'emotion': 'Anger', 'intensity': '4', 'reason': 'children …
366	My Father, a Judge, Said a Gun Control Case Was One of His Hardest. Now I See Why.	anonymous-source/all_shooting_images_newest/90325.jpg	[{'emotion': 'Sadness', 'intensity': '3', 'reason': 'After hearing about so many gun incidents, knowing how many people have guns in the United States, and understanding the gun laws in the United States, I can understand the importance and difficulty of gun control.', 'url': 'anonymous-source/all_shooting_images_newest/90325.jpg'}, {'emotion': 'Sadness', 'intensity': '3', 'reason': "Many people …
371	Baldwin returns to 'SNL' as Trump flip-flopping on gun control	anonymous-source/all_shooting_images_newest/10798.jpg	[{'emotion': 'Anger', 'intensity': '3', 'reason': "I don't think he paid enough attention to this serious issue.", 'url': 'anonymous-source/all_shooting_images_newest/10798.jpg'}, {'emotion': 'Amusement', 'intensity': '3', 'reason': 'It is funny content about a serious issue', 'url': 'anonymous-source/all_shooting_images_newest/10798.jpg'}, {'emotion': 'Anger', 'intensity': '3', 'reason': "that's…
375	Teens raised on lockdown drills feel the weight of the Florida shooting	anonymous-source/all_shooting_images_newest/10165.jpg	[{'emotion': 'Sadness', 'intensity': '3', 'reason': 'It is sad to realize the impact of guns on teenagers.', 'url': 'anonymous-source/all_shooting_images_newest/10165.jpg'}, {'emotion': 'Fear', 'intensity': '3', 'reason': "Many people grow up with lockdown drills but don't think it will ever happen to them", 'url': 'anonymous-source/all_shooting_images_newest/10165.jpg'}, {'emotion': 'Sadness', '…
380	More than a year after 9-year-old girl fatally shot during gun safety lesson, her father's case continues	anonymous-source/all_shooting_images_newest/90348.jpg	[{'emotion': 'Sadness', 'intensity': '1', 'reason': 'Why would the writer put these two things together?', 'url': 'anonymous-source/all_shooting_images_newest/90348.jpg'}, {'emotion': 'Disgust', 'intensity': '4', 'reason': 'there is no reason for a child to know how to use a gun this was completely avoidable', 'url': 'anonymous-source/all_shooting_images_newest/90348.jpg'}, {'emotion': 'Sadness',…
385	Protests staged for gun control, gun rights outside NRA meeting	anonymous-source/all_shooting_images_newest/10760.jpg	[{'emotion': 'Sadness', 'intensity': '1', 'reason': "Looks like the pic doesn't match the headline. Can't see anything related to gun control", 'url': 'anonymous-source/all_shooting_images_newest/10760.jpg'}, {'emotion': 'Contentment', 'intensity': '4', 'reason': 'I am glad students are doing this, but they should not have to. It makes me have a sense of comradery.', 'url': 'anonymous-source/all_…
390	I Placed Myself Under His Lifeless Body': Parkland Survivor Details School Shooting Experience At Kavanaugh Hearing	anonymous-source/all_shooting_images_newest/90353.jpg	[{'emotion': 'Sadness', 'intensity': '1', 'reason': 'I believe this is a good headline, if the pic match the text', 'url': 'anonymous-source/all_shooting_images_newest/90353.jpg'}, {'emotion': 'Sadness', 'intensity': '4', 'reason': 'this is such a horribly traumatizing situation to recall and it deeply saddens me that she had to experience that', 'url': 'anonymous-source/all_shooting_images_newes…
393	Hate crime charges filed in Pittsburgh synagogue shooting that left 11 dead	anonymous-source/all_shooting_images_newest/100245.jpg	[{'emotion': 'Fear', 'intensity': '1', 'reason': 'cannot see any problem here', 'url': 'anonymous-source/all_shooting_images_newest/100245.jpg'}, {'emotion': 'Sadness', 'intensity': '4', 'reason': 'the reminder of the tragedy overpowers the hate crime charges for me', 'url': 'anonymous-source/all_shooting_images_newest/100245.jpg'}, {'emotion': 'Sadness', 'intensity': '1', 'reason': 'hate crimes …
407	Eric Church, Maren Morris will honor Vegas shooting victims at Grammys	anonymous-source/all_shooting_images_newest/10274.jpg	[{'emotion': 'Awe', 'intensity': '3', 'reason': 'What a classy act by her', 'url': 'anonymous-source/all_shooting_images_newest/10274.jpg'}, {'emotion': 'Amusement', 'intensity': '1', 'reason': 'the picture looks like a party performance', 'url': 'anonymous-source/all_shooting_images_newest/10274.jpg'}, {'emotion': 'Excitement', 'intensity': '4', 'reason': 'Good thing - I think', 'url': 'anonymou…
412	She s a Gun-Owning Democrat. Her Opponent Calls Her an Extreme Liberal.	anonymous-source/all_shooting_images_newest/100393.jpg	[{'emotion': 'Amusement', 'intensity': '3', 'reason': 'It is funny how much name calling happens in politics', 'url': 'anonymous-source/all_shooting_images_newest/100393.jpg'}, {'emotion': 'Amusement', 'intensity': '1', 'reason': 'the headline reads not funny but the picture looks happy', 'url': 'anonymous-source/all_shooting_images_newest/100393.jpg'}, {'emotion': 'Contentment', 'intensity': '3'…
414	Teen Wearing Neo-Nazi Group Clothing Arrested With Cache of Illegal Weapons in Illinois	anonymous-source/all_shooting_images_newest/10062.jpg	[{'emotion': 'Fear', 'intensity': '4', 'reason': 'It is scary to think that these people exist', 'url': 'anonymous-source/all_shooting_images_newest/10062.jpg'}, {'emotion': 'Fear', 'intensity': '1', 'reason': 'the incident in the story would lead to fear', 'url': 'anonymous-source/all_shooting_images_newest/10062.jpg'}, {'emotion': 'Anger', 'intensity': '4', 'reason': 'How do people like this st…
417	Shields and Brooks on White House chaos, gun control polarization	anonymous-source/all_shooting_images_newest/10299.jpg	[{'emotion': 'Contentment', 'intensity': '3', 'reason': 'This picture does not invoke any strong emotions from me', 'url': 'anonymous-source/all_shooting_images_newest/10299.jpg'}, {'emotion': 'Fear', 'intensity': '1', 'reason': 'Feel nothing special', 'url': 'anonymous-source/all_shooting_images_newest/10299.jpg'}, {'emotion': 'Contentment', 'intensity': '1', 'reason': "I wouldn't care to read t…
425	Pittsburgh leaders, residents split over President Trump s trip to synagogue shooting site	anonymous-source/all_shooting_images_newest/100088.jpg	[{'emotion': 'Sadness', 'intensity': '3', 'reason': 'She seems so sad', 'url': 'anonymous-source/all_shooting_images_newest/100088.jpg'}, {'emotion': 'Sadness', 'intensity': '4', 'reason': 'This keeps happening, and I feel empathy for the friends and families of victims being pulled into a political tug-of-war. ', 'url': 'anonymous-source/all_shooting_images_newest/100088.jpg'}, {'emotion': 'Sadn…
426	Inoperable handgun found at Waukegan alternative school	anonymous-source/all_shooting_images_newest/10029.jpg	[{'emotion': 'Fear', 'intensity': '3', 'reason': 'school is not the place guns appear', 'url': 'anonymous-source/all_shooting_images_newest/10029.jpg'}, {'emotion': 'Fear', 'intensity': '3', 'reason': "Although the gun can't operate, it's still a gun and it was in a school. This happens sometimes, but it's always unnerving. ", 'url': 'anonymous-source/all_shooting_images_newest/10029.jpg'}, {'emo…
431	Sacha Baron Cohen pranks former Arizona sheriff Joe Arpaio into debating gun control with a Shopkins toy	anonymous-source/all_shooting_images_newest/199.jpg	[{'emotion': 'Anger', 'intensity': '3', 'reason': 'you should not make fun at such a serious topic', 'url': 'anonymous-source/all_shooting_images_newest/199.jpg'}, {'emotion': 'Amusement', 'intensity': '4', 'reason': "I remember this episode of the show. It was hilarious to see him succeed in stringing Arpaio along. I also have no sympathy for Arpaio, so I don't feel anything aside from schadenfr…
433	What is gun control? Everything you need to know	anonymous-source/all_shooting_images_newest/10005.jpg	[{'emotion': 'Contentment', 'intensity': '3', 'reason': "Seems like he wants to introduce the topic, let's see.", 'url': 'anonymous-source/all_shooting_images_newest/10005.jpg'}, {'emotion': 'Sadness', 'intensity': '1', 'reason': "I tend to find photos of guns a little disconcerting, but the article itself is neutral - I can't tell what agenda it pushes by the text alone.", 'url': 'anonymous-sour…
435	Pittsburgh synagogue-shooting suspect wheeled into courtroom; Trump to visit city Tuesday	anonymous-source/all_shooting_images_newest/100102.jpg	[{'emotion': 'Sadness', 'intensity': '3', 'reason': 'The woman seems so sad', 'url': 'anonymous-source/all_shooting_images_newest/100102.jpg'}, {'emotion': 'Sadness', 'intensity': '4', 'reason': "I'm more focused on the image here - the headlines don't have a particularly opinionated slant. It's sad to remember how many shootings have happened here.", 'url': 'anonymous-source/all_shooting_images_…
436	22 West Aurora students participate in third national walkout since Parkland shooting	anonymous-source/all_shooting_images_newest/10031.jpg	[{'emotion': 'Fear', 'intensity': '3', 'reason': 'there might be another shooting accident.', 'url': 'anonymous-source/all_shooting_images_newest/10031.jpg'}, {'emotion': 'Awe', 'intensity': '3', 'reason': "I'm proud of the kids for demonstrating, but really sad they have to. ", 'url': 'anonymous-source/all_shooting_images_newest/10031.jpg'}, {'emotion': 'Awe', 'intensity': '3', 'reason': 'that i…
441	Sanders gets emotional at child's school shooting question	anonymous-source/all_shooting_images_newest/10279.jpg	[{'emotion': 'Sadness', 'intensity': '3', 'reason': 'Its sad to see kids traumatized from gun violence. Doesnt seem right. ', 'url': 'anonymous-source/all_shooting_images_newest/10279.jpg'}, {'emotion': 'Sadness', 'intensity': '5', 'reason': 'a child should never go through a traumatizing situation such as a school shooting which can harm their mental health for the rest of their lives. They migh…
445	A month before deadly school shooting, Texas students protested gun violence	anonymous-source/all_shooting_images_newest/10379.jpg	[{'emotion': 'Sadness', 'intensity': '3', 'reason': 'Its sad to see how protesting against gun violence isnt enough.', 'url': 'anonymous-source/all_shooting_images_newest/10379.jpg'}, {'emotion': 'Anger', 'intensity': '5', 'reason': 'this situation could have been stopped if an authority figure took action and listened to these students before having their lives being taken.', 'url': 'anonymous-s…
446	8 men, 3 women killed in Pittsburgh synagogue shooting mourned	anonymous-source/all_shooting_images_newest/100333.jpg	[{'emotion': 'Sadness', 'intensity': '3', 'reason': 'Its sad to see victims of gun violence. ', 'url': 'anonymous-source/all_shooting_images_newest/100333.jpg'}, {'emotion': 'Sadness', 'intensity': '5', 'reason': 'there have been too many situations where innocent lives are taken due to gun violence and yet nothing is being done.', 'url': 'anonymous-source/all_shooting_images_newest/100333.jpg'},…
447	Incident involving replica weapon has Oswego District 308 looking at 'additional ways to screen' people entering schools	anonymous-source/all_shooting_images_newest/141.jpg	[{'emotion': 'Contentment', 'intensity': '3', 'reason': 'This is how it should be everywhere.', 'url': 'anonymous-source/all_shooting_images_newest/141.jpg'}, {'emotion': 'Anger', 'intensity': '4', 'reason': 'this can be a traumatizing and uncomfortable situation for students at that school, and this can be prohibited if only those in charge would have taken action to stop the incident.', 'url': …
449	Florida shooter showed violence at home, police reports reveal	anonymous-source/all_shooting_images_newest/10264.jpg	[{'emotion': 'Disgust', 'intensity': '3', 'reason': 'Its awful to see headlines like these.', 'url': 'anonymous-source/all_shooting_images_newest/10264.jpg'}, {'emotion': 'Disgust', 'intensity': '5', 'reason': 'how can someone so vile still get away with his actions. why did no one come forward and report it to the police and prevent the murder of the 17 victims. ', 'url': 'anonymous-source/all_s…
453	We in Congress should protect students from gun violence as well as we protect ourselves	anonymous-source/all_shooting_images_newest/10310.jpg	[{'emotion': 'Contentment', 'intensity': '3', 'reason': 'I agree that students safety should be higher prioritized', 'url': 'anonymous-source/all_shooting_images_newest/10310.jpg'}, {'emotion': 'Contentment', 'intensity': '5', 'reason': "that's the right mindset they should go forward with. students should always feel safe and well protected especially at school. ", 'url': 'anonymous-source/all_s…
460	Morning Spin: Democrats' deadline to override Rauner gun bill veto comes on same day as Second Amendment rally	anonymous-source/all_shooting_images_newest/10081.jpg	[{'emotion': 'Excitement', 'intensity': '3', 'reason': 'support such decisions', 'url': 'anonymous-source/all_shooting_images_newest/10081.jpg'}, {'emotion': 'Excitement', 'intensity': '4', 'reason': 'what a coincidence ', 'url': 'anonymous-source/all_shooting_images_newest/10081.jpg'}, {'emotion': 'Fear', 'intensity': '3', 'reason': 'Of the seriousness of the issue and the polarization on gun co…
463	Texas judge to roll out new plan aimed at getting more guns away from domestic violence offenders	anonymous-source/all_shooting_images_newest/488.jpg	[{'emotion': 'Excitement', 'intensity': '3', 'reason': 'support this plan', 'url': 'anonymous-source/all_shooting_images_newest/488.jpg'}, {'emotion': 'Excitement', 'intensity': '5', 'reason': 'I want to see change; not everyone should be able to get gun; even if not used, they can be threat', 'url': 'anonymous-source/all_shooting_images_newest/488.jpg'}, {'emotion': 'Contentment', 'intensity': '…
473	Planned shift on gun exports kicks up storm	anonymous-source/all_shooting_images_newest/10131.jpg	[{'emotion': 'Excitement', 'intensity': '3', 'reason': 'no feeling ', 'url': 'anonymous-source/all_shooting_images_newest/10131.jpg'}, {'emotion': 'Fear', 'intensity': '4', 'reason': 'the title suggests something but not in details leaving place for fear', 'url': 'anonymous-source/all_shooting_images_newest/10131.jpg'}, {'emotion': 'Fear', 'intensity': '3', 'reason': 'Gun exports would cause more…
477	Father who lost child in Parkland massacre: Survivors' gun control efforts go 'in the wrong direction'	anonymous-source/all_shooting_images_newest/10311.jpg	[{'emotion': 'Anger', 'intensity': '3', 'reason': 'no feeling ', 'url': 'anonymous-source/all_shooting_images_newest/10311.jpg'}, {'emotion': 'Sadness', 'intensity': '4', 'reason': 'sad that he is fighting but still knowing that he already lost the battle', 'url': 'anonymous-source/all_shooting_images_newest/10311.jpg'}, {'emotion': 'Sadness', 'intensity': '3', 'reason': 'It must be hard to lose …
480	Unlikely pair could usher gun rights case to U.S. Supreme Court	anonymous-source/all_shooting_images_newest/238.jpg	[{'emotion': 'Sadness', 'intensity': '4', 'reason': 'It’s sad to think how these issues are affecting people today. ', 'url': 'anonymous-source/all_shooting_images_newest/238.jpg'}, {'emotion': 'Fear', 'intensity': '3', 'reason': "I don't agree with citizen gun ownership.", 'url': 'anonymous-source/all_shooting_images_newest/238.jpg'}, {'emotion': 'Sadness', 'intensity': '4', 'reason': 'Justices …
483	Glendale police approved to hold first gun-buyback event	anonymous-source/all_shooting_images_newest/55.jpg	[{'emotion': 'Fear', 'intensity': '5', 'reason': 'This is a ticket for people to access and acquire a weapon that can be used against many which is very frightening.', 'url': 'anonymous-source/all_shooting_images_newest/55.jpg'}, {'emotion': 'Fear', 'intensity': '3', 'reason': "I don't agree with citizen gun ownership.", 'url': 'anonymous-source/all_shooting_images_newest/55.jpg'}, {'emotion': 'A…
486	Thousands Attended The First Funerals For The Victims Of The Pittsburgh Synagogue Shooting	anonymous-source/all_shooting_images_newest/100417.jpg	[{'emotion': 'Sadness', 'intensity': '4', 'reason': 'This makes me sad after hearing about this unfortunate event. ', 'url': 'anonymous-source/all_shooting_images_newest/100417.jpg'}, {'emotion': 'Sadness', 'intensity': '3', 'reason': 'It must have left a scar on the psyche of these children', 'url': 'anonymous-source/all_shooting_images_newest/100417.jpg'}, {'emotion': 'Amusement', 'intensity': …
487	School shootings: How parents can cope with their own fears and anxieties	anonymous-source/all_shooting_images_newest/90267.jpg	[{'emotion': 'Sadness', 'intensity': '4', 'reason': 'This is scary for the parents because they’re sending their children to a school, which they think is safe.', 'url': 'anonymous-source/all_shooting_images_newest/90267.jpg'}, {'emotion': 'Contentment', 'intensity': '3', 'reason': 'i am not a parent, but i will be helpful for parents', 'url': 'anonymous-source/all_shooting_images_newest/90267.jp…
488	Broward County, Florida, newspaper pulls all gun ads following front-page controversy	anonymous-source/all_shooting_images_newest/10837.jpg	[{'emotion': 'Contentment', 'intensity': '4', 'reason': 'I feel like it’s not right to promote guns anywhere, like online or on print. ', 'url': 'anonymous-source/all_shooting_images_newest/10837.jpg'}, {'emotion': 'Excitement', 'intensity': '3', 'reason': 'There should be no gun-related advertising to encourage people to buy', 'url': 'anonymous-source/all_shooting_images_newest/10837.jpg'}, {'em…
496	Las Vegas marks 1-year shooting anniversary Video	anonymous-source/all_shooting_images_newest/100418.jpg	[{'emotion': 'Sadness', 'intensity': '4', 'reason': 'It’s important to realize and remember these unfortunate events that happened.', 'url': 'anonymous-source/all_shooting_images_newest/100418.jpg'}, {'emotion': 'Sadness', 'intensity': '3', 'reason': 'Grief for the victims', 'url': 'anonymous-source/all_shooting_images_newest/100418.jpg'}, {'emotion': 'Sadness', 'intensity': '4', 'reason': 'sorry…
497	Teaching in the Age of School Shootings	anonymous-source/all_shooting_images_newest/90342.jpg	[{'emotion': 'Sadness', 'intensity': '4', 'reason': 'It’s sad to think about the circumstances students are learning in today. ', 'url': 'anonymous-source/all_shooting_images_newest/90342.jpg'}, {'emotion': 'Sadness', 'intensity': '3', 'reason': 'Grief and despair over school shootings', 'url': 'anonymous-source/all_shooting_images_newest/90342.jpg'}, {'emotion': 'Sadness', 'intensity': '4', 'rea…
498	Tomi Lahren s Gun in Yoga Pants Instagram Post Sparks Social Media Ridicule	anonymous-source/all_shooting_images_newest/10838.jpg	[{'emotion': 'Disgust', 'intensity': '3', 'reason': 'This disgusts me because I feel like are intentionally doing it, which can create issues.', 'url': 'anonymous-source/all_shooting_images_newest/10838.jpg'}, {'emotion': 'Disgust', 'intensity': '3', 'reason': 'This is claptrap', 'url': 'anonymous-source/all_shooting_images_newest/10838.jpg'}, {'emotion': 'Sadness', 'intensity': '4', 'reason': 't…
499	Remington, Centuries-Old Gun Maker, Files for Bankruptcy as Sales Slow	anonymous-source/all_shooting_images_newest/10006.jpg	[{'emotion': 'Contentment', 'intensity': '3', 'reason': 'this headline implies that gun sales are droppings. ', 'url': 'anonymous-source/all_shooting_images_newest/10006.jpg'}, {'emotion': 'Contentment', 'intensity': '3', 'reason': 'I feel like this should’ve happened before.', 'url': 'anonymous-source/all_shooting_images_newest/10006.jpg'}, {'emotion': 'Contentment', 'intensity': '3', 'reason': …
500	WI-Sen: Here s why a candidate s ad shows her sitting with a gun nearby	anonymous-source/all_shooting_images_newest/10148.jpg	[{'emotion': 'Anger', 'intensity': '3', 'reason': 'candidates often use firearms to make political statements, ignoring the potential ramifications of their words and support on those who may be inclined to commit acts of violence. ', 'url': 'anonymous-source/all_shooting_images_newest/10148.jpg'}, {'emotion': 'Fear', 'intensity': '4', 'reason': 'I’m not sure what the video is about, whether it’s…
502	Trump: Shooting had little to do with gun laws	anonymous-source/all_shooting_images_newest/100482.jpg	[{'emotion': 'Anger', 'intensity': '4', 'reason': 'this is blatantly false and ignores the potential solution to reducing gun violence. ', 'url': 'anonymous-source/all_shooting_images_newest/100482.jpg'}, {'emotion': 'Anger', 'intensity': '5', 'reason': 'This right here shows the stupidity of Trump and how he doesn’t even consider that there’s a connection. ', 'url': 'anonymous-source/all_shootin…
505	Memorial Service, 5K Among Events Marking Las Vegas Shooting	anonymous-source/all_shooting_images_newest/90420.jpg	[{'emotion': 'Sadness', 'intensity': '3', 'reason': 'there should not be "fun" events at a memorial for those senselessly killed when the problem itself is not being addressed. ', 'url': 'anonymous-source/all_shooting_images_newest/90420.jpg'}, {'emotion': 'Sadness', 'intensity': '4', 'reason': 'It’s sad that this unfortunate event happened, but it is important to pay tribute to the victims.', 'u…
507	A new video game simulated school shootings. After outcry, it got taken down.	anonymous-source/all_shooting_images_newest/10437.jpg	[{'emotion': 'Disgust', 'intensity': '3', 'reason': 'there is absolutely no reason that this should be implemented in a game.', 'url': 'anonymous-source/all_shooting_images_newest/10437.jpg'}, {'emotion': 'Fear', 'intensity': '5', 'reason': 'I feel people can pull so many thoughts from reading this statement and how it can affect many.', 'url': 'anonymous-source/all_shooting_images_newest/10437.j…
511	Democratic senator threatens to stall Trump nominee over 3D guns	anonymous-source/all_shooting_images_newest/66.jpg	[{'emotion': 'Excitement', 'intensity': '3', 'reason': 'real action to prevent gun enthusiasts from implementing their agenda are being taken. ', 'url': 'anonymous-source/all_shooting_images_newest/66.jpg'}, {'emotion': 'Contentment', 'intensity': '4', 'reason': 'What Trump is doing is childish. It’s important that his nominee is being stalled because the 3D print guns decision hasn’t been made.'…
517	Stephen Colbert Stands With Florida Students Fighting for Gun Control	anonymous-source/all_shooting_images_newest/10439.jpg	[{'emotion': 'Contentment', 'intensity': '2', 'reason': 'it is comforting to see celebrities speaking up for those impacted by gun violence and using their platform to address it. ', 'url': 'anonymous-source/all_shooting_images_newest/10439.jpg'}, {'emotion': 'Awe', 'intensity': '5', 'reason': 'It’s important for influencers with big followings to advocate for things like these for it to lead to …
519	Florida 'stand your ground' shooter had history of gun threats: Complaint	anonymous-source/all_shooting_images_newest/1.jpg	[{'emotion': 'Fear', 'intensity': '4', 'reason': 'how something like was not noticed', 'url': 'anonymous-source/all_shooting_images_newest/1.jpg'}, {'emotion': 'Sadness', 'intensity': '3', 'reason': 'these bad people should definitely e arrested and taught what to do in the future. the government should not give them the chance to do bad things for the second time.', 'url': 'anonymous-source/all_…
526	Pittsburgh Synagogue Shooting Spurs Outpouring of Grief	anonymous-source/all_shooting_images_newest/100446.jpg	[{'emotion': 'Sadness', 'intensity': '5', 'reason': 'it is sad to see people grieving', 'url': 'anonymous-source/all_shooting_images_newest/100446.jpg'}, {'emotion': 'Sadness', 'intensity': '3', 'reason': 'those people died are innocent. it is so sad the event caused so many people die.', 'url': 'anonymous-source/all_shooting_images_newest/100446.jpg'}, {'emotion': 'Sadness', 'intensity': '3', 'r…
527	Recent mass shootings launch discussion of social justice issues in North Shore Country Day class	anonymous-source/all_shooting_images_newest/110413.jpg	[{'emotion': 'Excitement', 'intensity': '3', 'reason': 'I want to see changes and awareness campaigns and I like that people are making a movement.', 'url': 'anonymous-source/all_shooting_images_newest/110413.jpg'}, {'emotion': 'Contentment', 'intensity': '3', 'reason': 'these events need to be talked in class to teach the students at a earlier age about how to use guns correctly and how to prote…
528	Bandmates remember friend killed in series of 'cold-blooded' Nashville shootings	anonymous-source/all_shooting_images_newest/3.jpg	[{'emotion': 'Fear', 'intensity': '4', 'reason': 'victims are just people not so different from us', 'url': 'anonymous-source/all_shooting_images_newest/3.jpg'}, {'emotion': 'Sadness', 'intensity': '3', 'reason': 'it is so sad that a friends that play the music with you die because of being shooted by a gun.', 'url': 'anonymous-source/all_shooting_images_newest/3.jpg'}, {'emotion': 'Fear', 'inten…
530	7 ways to help prevent school shootings	anonymous-source/all_shooting_images_newest/10169.jpg	[{'emotion': 'Sadness', 'intensity': '4', 'reason': 'it looks like a survival guide', 'url': 'anonymous-source/all_shooting_images_newest/10169.jpg'}, {'emotion': 'Contentment', 'intensity': '3', 'reason': 'such kind of information is quite important for people especially those who live in states where people can hold guns.', 'url': 'anonymous-source/all_shooting_images_newest/10169.jpg'}, {'emot…
546	Gunman who killed 2 at Florida yoga studio had history of harassing young women	anonymous-source/all_shooting_images_newest/110507.jpg	[{'emotion': 'Anger', 'intensity': '2', 'reason': 'Angering to see someone so disconnected and desensitized to society like this. I think it makes me angrier that the perpetrator has a history of harassment than the fact that he committed an act of terrorism.', 'url': 'anonymous-source/all_shooting_images_newest/110507.jpg'}, {'emotion': 'Disgust', 'intensity': '3', 'reason': 'if he was known for…
555	You should feel unsettled': Gun-control statues aim to evoke students' terror during lockdowns	anonymous-source/all_shooting_images_newest/90074.jpg	[{'emotion': 'Amusement', 'intensity': '1', 'reason': 'this is an example of a tactic in a pr campaign to make gun supporters feel guilty, something I mentioned in one of the prior comments. I am amused by the fact that I mentioned it just a second ago.', 'url': 'anonymous-source/all_shooting_images_newest/90074.jpg'}, {'emotion': 'Sadness', 'intensity': '3', 'reason': 'it is a sad statue', 'url'…
556	Yoga studio shooter posted racist, misogynistic videos	anonymous-source/all_shooting_images_newest/110509.jpg	[{'emotion': 'Disgust', 'intensity': '3', 'reason': 'So much hate in people like this ', 'url': 'anonymous-source/all_shooting_images_newest/110509.jpg'}, {'emotion': 'Disgust', 'intensity': '5', 'reason': 'its always about like that and also harassed women', 'url': 'anonymous-source/all_shooting_images_newest/110509.jpg'}, {'emotion': 'Disgust', 'intensity': '3', 'reason': 'bad person always did…
559	Calif. teacher arrested for road rage and armed robbery, had loaded gun in classroom during arrest	anonymous-source/all_shooting_images_newest/397.jpg	[{'emotion': 'Fear', 'intensity': '3', 'reason': 'It’s scary to think that there are faculty members keeping armed weapons in their classroom with students in it. ', 'url': 'anonymous-source/all_shooting_images_newest/397.jpg'}, {'emotion': 'Fear', 'intensity': '2', 'reason': 'its disturbing to see teaches carrying guns to school', 'url': 'anonymous-source/all_shooting_images_newest/397.jpg'}, {'…
564	YouTube to Ban Videos Promoting Gun Sales	anonymous-source/all_shooting_images_newest/10277.jpg	[{'emotion': 'Contentment', 'intensity': '3', 'reason': 'This is good that Youtube is banning videos promoting gun sales because it doesn’t add as another influence for people to purchase one. ', 'url': 'anonymous-source/all_shooting_images_newest/10277.jpg'}, {'emotion': 'Contentment', 'intensity': '3', 'reason': "I hope other social media and online platform companies follow YouTube's lead and …
565	Democrats invite students affected by gun violence to intern for the summer	anonymous-source/all_shooting_images_newest/10720.jpg	[{'emotion': 'Contentment', 'intensity': '3', 'reason': 'This is an opportunity for students to work with Democrats, but I hope that they are not using the students as a persuasion technique.', 'url': 'anonymous-source/all_shooting_images_newest/10720.jpg'}, {'emotion': 'Contentment', 'intensity': '3', 'reason': 'These students finally have a platform to build their futures and share their storie…
566	Trump dubs California bar shooter 'sick puppy' as community grieves	anonymous-source/all_shooting_images_newest/110128.jpg	[{'emotion': 'Disgust', 'intensity': '4', 'reason': 'The words Trump uses to describe people is disgusting. What the shooter did was wrong, but Trump does not have to use “sick puppy” to describe someone because it can be interpreted as someone who needed help. ', 'url': 'anonymous-source/all_shooting_images_newest/110128.jpg'}, {'emotion': 'Amusement', 'intensity': '3', 'reason': 'Trump has an i…
569	Parkland School Shooter Blames Massacre on a Demon Voice	anonymous-source/all_shooting_images_newest/418.jpg	[{'emotion': 'Disgust', 'intensity': '5', 'reason': 'It’s disgusting to think that after ending the lives of many people, you would blame it on a demon voice. ', 'url': 'anonymous-source/all_shooting_images_newest/418.jpg'}, {'emotion': 'Sadness', 'intensity': '2', 'reason': "I don't know if he's mentally healthy or not so I can't judge", 'url': 'anonymous-source/all_shooting_images_newest/418.jp…
570	Student survivors of mass shooting say they're disappointed in lawmakers, but vow to keep fighting	anonymous-source/all_shooting_images_newest/10697.jpg	[{'emotion': 'Awe', 'intensity': '5', 'reason': 'This is an ongoing issue that needs to be addressed since there are many shootings happening we see on the news. It’s nice to hear that people won’t stop until there is change. ', 'url': 'anonymous-source/all_shooting_images_newest/10697.jpg'}, {'emotion': 'Sadness', 'intensity': '2', 'reason': "this isn't the first time lawmakers have failed the p…
574	Why It May Be Impossible to Measure the Impact of Stores Limiting Gun Sales	anonymous-source/all_shooting_images_newest/10294.jpg	[{'emotion': 'Anger', 'intensity': '5', 'reason': 'This is frustrating to think that stores can’t control the promotion or gun sales. The store’s profit is increasing, but try to consider the lives of many people who are scared to step outside because they have a target on their back.', 'url': 'anonymous-source/all_shooting_images_newest/10294.jpg'}, {'emotion': 'Sadness', 'intensity': '2', 'reas…
586	That's it no more guns.	anonymous-source/all_shooting_images_newest/100483.jpg	[{'emotion': 'Sadness', 'intensity': '5', 'reason': 'I feel sad towards tombs people murdered by guns, and that back image made me feel extremely sad.', 'url': 'anonymous-source/all_shooting_images_newest/100483.jpg'}, {'emotion': 'Contentment', 'intensity': '5', 'reason': 'I completely agree that there should be no more guns', 'url': 'anonymous-source/all_shooting_images_newest/100483.jpg'}, {'e…
596	Community mourns after mass shooting at Pittsburgh synagogue	anonymous-source/all_shooting_images_newest/100490.jpg	[{'emotion': 'Sadness', 'intensity': '4', 'reason': 'Candles lightening without people images expresses a mood of sad.', 'url': 'anonymous-source/all_shooting_images_newest/100490.jpg'}, {'emotion': 'Sadness', 'intensity': '5', 'reason': 'this is another tragedy of gun violence', 'url': 'anonymous-source/all_shooting_images_newest/100490.jpg'}, {'emotion': 'Sadness', 'intensity': '3', 'reason': '…
599	What the FBI Knew About the Accused Florida School Shooter and When	anonymous-source/all_shooting_images_newest/10780.jpg	[{'emotion': 'Fear', 'intensity': '4', 'reason': "It is scary to think the FBI knew the shooter; the actual shooter's face also makes me feel fearful. ", 'url': 'anonymous-source/all_shooting_images_newest/10780.jpg'}, {'emotion': 'Excitement', 'intensity': '3', 'reason': 'Excitement', 'url': 'anonymous-source/all_shooting_images_newest/10780.jpg'}, {'emotion': 'Anger', 'intensity': '3', 'reason'…
601	We've Been Waiting for You.' Barack Obama Praises the Teen Shooting Survivors Fighting for Gun Control	anonymous-source/all_shooting_images_newest/10409.jpg	[{'emotion': 'Contentment', 'intensity': '5', 'reason': 'It is inspiring to see that politicians are supporting young people to speak out about the issue that matter to them. ', 'url': 'anonymous-source/all_shooting_images_newest/10409.jpg'}, {'emotion': 'Excitement', 'intensity': '3', 'reason': 'Excitement', 'url': 'anonymous-source/all_shooting_images_newest/10409.jpg'}, {'emotion': 'Contentmen…
606	Las Vegas shooting memorial marks grim anniversary: 'None of us will ever be the same'	anonymous-source/all_shooting_images_newest/100440.jpg	[{'emotion': 'Sadness', 'intensity': '5', 'reason': 'Seeing the actual vigils for the shooting along with the headline made me feel sadness; felt like I was the funeral. ', 'url': 'anonymous-source/all_shooting_images_newest/100440.jpg'}, {'emotion': 'Excitement', 'intensity': '3', 'reason': 'Excitement', 'url': 'anonymous-source/all_shooting_images_newest/100440.jpg'}, {'emotion': 'Sadness', 'in…
610	These Are The Victims Of The Santa Fe High School Shooting	anonymous-source/all_shooting_images_newest/10044.jpg	[{'emotion': 'Sadness', 'intensity': '5', 'reason': 'seeing the crying face and the word victims really tugs at your heart strings showing the severity of the effects. Feels very tragic. ', 'url': 'anonymous-source/all_shooting_images_newest/10044.jpg'}, {'emotion': 'Excitement', 'intensity': '3', 'reason': 'Excitement', 'url': 'anonymous-source/all_shooting_images_newest/10044.jpg'}, {'emotion':…
612	Rudy Giuliani keeps tweeting on Chicago gun violence and Garry McCarthy says he's 'a proud Democrat'	anonymous-source/all_shooting_images_newest/460.jpg	[{'emotion': 'Amusement', 'intensity': '5', 'reason': 'I do not know how these two sentences connected to each other so I felt pretty confused about this headline. ', 'url': 'anonymous-source/all_shooting_images_newest/460.jpg'}, {'emotion': 'Excitement', 'intensity': '3', 'reason': 'Excitement', 'url': 'anonymous-source/all_shooting_images_newest/460.jpg'}, {'emotion': 'Amusement', 'intensity': …
613	It must always be people over profits': Jacksonville shooting survivors to file lawsuit	anonymous-source/all_shooting_images_newest/165.jpg	[{'emotion': 'Sadness', 'intensity': '4', 'reason': 'It is sad to that they have to sue in the first place. But the words in the suit are truly tragic and reflect a lot of American sentiment. ', 'url': 'anonymous-source/all_shooting_images_newest/165.jpg'}, {'emotion': 'Excitement', 'intensity': '3', 'reason': 'Excitement', 'url': 'anonymous-source/all_shooting_images_newest/165.jpg'}, {'emotion'…
616	Community, Religious Leaders Say Pittsburgh Synagogue Shooting 'Will Not Break Us' At Vigil	anonymous-source/all_shooting_images_newest/100445.jpg	[{'emotion': 'Fear', 'intensity': '5', 'reason': 'I remember when the shooting first happened being so scared that something bad happened to someone I knew. So this image and headline bring back those feelings of fear and sadness. ', 'url': 'anonymous-source/all_shooting_images_newest/100445.jpg'}, {'emotion': 'Excitement', 'intensity': '3', 'reason': 'Excitement', 'url': 'anonymous-source/all_sh…
620	Son, I love you': Heartbreaking stories emerge of Thousand Oaks mass shooting victims - ABC News	anonymous-source/all_shooting_images_newest/110517.jpg	[{'emotion': 'Sadness', 'intensity': '4', 'reason': 'such acts of mass shootings are sad to see how people loose their love ones.', 'url': 'anonymous-source/all_shooting_images_newest/110517.jpg'}, {'emotion': 'Sadness', 'intensity': '2', 'reason': "I don't know the story behind this headline", 'url': 'anonymous-source/all_shooting_images_newest/110517.jpg'}, {'emotion': 'Sadness', 'intensity': '…
623	Judge blocks release of blueprints for 3D guns	anonymous-source/all_shooting_images_newest/188.jpg	[{'emotion': 'Contentment', 'intensity': '3', 'reason': 'not only this is right, but at the same time people should be educated against gun violence and should be taught to use technology for betterment of society.', 'url': 'anonymous-source/all_shooting_images_newest/188.jpg'}, {'emotion': 'Contentment', 'intensity': '2', 'reason': 'guns of all shapes and sizes can be printed.', 'url': 'anonymou…
624	NRA reports $55M decline in 2017 funding | TheHill	anonymous-source/all_shooting_images_newest/110342.jpg	[{'emotion': 'Amusement', 'intensity': '3', 'reason': 'it is great to see people interest in buying guns decreasing over time.', 'url': 'anonymous-source/all_shooting_images_newest/110342.jpg'}, {'emotion': 'Awe', 'intensity': '1', 'reason': 'Never thought I would see a day when the NRA had reduced fund raising.', 'url': 'anonymous-source/all_shooting_images_newest/110342.jpg'}, {'emotion': 'Cont…
626	Former co-worker: Wisconsin shooting suspect never smiled	anonymous-source/all_shooting_images_newest/90147.jpg	[{'emotion': 'Sadness', 'intensity': '3', 'reason': 'action against mass shooters should be taken seriously.', 'url': 'anonymous-source/all_shooting_images_newest/90147.jpg'}, {'emotion': 'Sadness', 'intensity': '1', 'reason': 'Show cares if he smiles.', 'url': 'anonymous-source/all_shooting_images_newest/90147.jpg'}, {'emotion': 'Fear', 'intensity': '2', 'reason': "I think it's creepy that the s…
633	The Americas Account for Half of Annual Gun Deaths Worldwide	anonymous-source/all_shooting_images_newest/376.jpg	[{'emotion': 'Sadness', 'intensity': '3', 'reason': 'sad to see how a developed country like USA is leading the deaths of people due to gun violence, which indicates a strict action should be taken.', 'url': 'anonymous-source/all_shooting_images_newest/376.jpg'}, {'emotion': 'Awe', 'intensity': '1', 'reason': 'I knew we were bad but not that bad.', 'url': 'anonymous-source/all_shooting_images_new…
635	15 Students Have Been Arrested for Threatening School Violence since Parkland Shooting, Officials Say	anonymous-source/all_shooting_images_newest/10100.jpg	[{'emotion': 'Sadness', 'intensity': '3', 'reason': 'it is sad to see students taking part in gun violence.', 'url': 'anonymous-source/all_shooting_images_newest/10100.jpg'}, {'emotion': 'Sadness', 'intensity': '1', 'reason': "My friend's daughter went to school there.", 'url': 'anonymous-source/all_shooting_images_newest/10100.jpg'}, {'emotion': 'Sadness', 'intensity': '2', 'reason': "I'm sad th…
636	Gov. Brown just signed a stack of new gun control laws. Here's what they do	anonymous-source/all_shooting_images_newest/90227.jpg	[{'emotion': 'Contentment', 'intensity': '3', 'reason': 'great to see government taking and passing laws to control the gun violence.', 'url': 'anonymous-source/all_shooting_images_newest/90227.jpg'}, {'emotion': 'Anger', 'intensity': '1', 'reason': 'Not enough is done.', 'url': 'anonymous-source/all_shooting_images_newest/90227.jpg'}, {'emotion': 'Contentment', 'intensity': '4', 'reason': 'I lik…
640	How Proposed Plans to Stop the Next School Shooter Might Affect People With Mental Illness	anonymous-source/all_shooting_images_newest/10217.jpg	[{'emotion': 'Disgust', 'intensity': '4', 'reason': 'the political figure here has mocked disabled people and done nothing to stop gun violence', 'url': 'anonymous-source/all_shooting_images_newest/10217.jpg'}, {'emotion': 'Sadness', 'intensity': '3', 'reason': "The proposed plans likely won't work", 'url': 'anonymous-source/all_shooting_images_newest/10217.jpg'}, {'emotion': 'Sadness', 'intensit…
643	The Gun Business Is Bouncing Back From a Long Trump Slump	anonymous-source/all_shooting_images_newest/90116.jpg	[{'emotion': 'Fear', 'intensity': '4', 'reason': 'i do not want more people owning guns', 'url': 'anonymous-source/all_shooting_images_newest/90116.jpg'}, {'emotion': 'Fear', 'intensity': '3', 'reason': 'More guns is not a good thing', 'url': 'anonymous-source/all_shooting_images_newest/90116.jpg'}, {'emotion': 'Fear', 'intensity': '3', 'reason': "guns cause many issues in today's society. There …
646	Michigan's top court hearing cases over guns at schools	anonymous-source/all_shooting_images_newest/10164.jpg	[{'emotion': 'Anger', 'intensity': '3', 'reason': 'I am not sure what the caption to the photo meant', 'url': 'anonymous-source/all_shooting_images_newest/10164.jpg'}, {'emotion': 'Sadness', 'intensity': '3', 'reason': 'Why is this so divisive to need top courts?', 'url': 'anonymous-source/all_shooting_images_newest/10164.jpg'}, {'emotion': 'Fear', 'intensity': '3', 'reason': "I don't believe tha…
665	Grieving parents of teen killed in Parkland school shooting use 'graphic activism' to confront the NRA	anonymous-source/all_shooting_images_newest/10860.jpg	[{'emotion': 'Sadness', 'intensity': '5', 'reason': 'I can feel the sadness of parents who can only protest against gun abuse in America in this way', 'url': 'anonymous-source/all_shooting_images_newest/10860.jpg'}, {'emotion': 'Awe', 'intensity': '3', 'reason': 'these parents who are obviously grieving are persevering and fighting.', 'url': 'anonymous-source/all_shooting_images_newest/10860.jpg'…
666	Thousands Gather to Honor Victims of the Mass Shooting with Tears, Candlelight and Song	anonymous-source/all_shooting_images_newest/110414.jpg	[{'emotion': 'Sadness', 'intensity': '5', 'reason': 'I could feel their prayers for the victims and their anger at the misuse of guns.', 'url': 'anonymous-source/all_shooting_images_newest/110414.jpg'}, {'emotion': 'Sadness', 'intensity': '5', 'reason': 'no one should be crying, no one should be mourning lives lost at the hands of guns.', 'url': 'anonymous-source/all_shooting_images_newest/110414…
671	Florida state senator: Only thoughts and prayers will stop evil behind shootings	anonymous-source/all_shooting_images_newest/10582.jpg	[{'emotion': 'Contentment', 'intensity': '5', 'reason': 'I strongly agree with the Senate that the gun problem is ultimately due to the misuse of guns by people who are not mentally mature. This can be effectively prevented by improving education', 'url': 'anonymous-source/all_shooting_images_newest/10582.jpg'}, {'emotion': 'Anger', 'intensity': '5', 'reason': 'the very person who has the power t…
674	California lawmakers vote to expand gun restraining orders but ACLU says bill goes too far	anonymous-source/all_shooting_images_newest/10623.jpg	[{'emotion': 'Anger', 'intensity': '5', 'reason': "The ACLU's argument is wrong, people's desire for safety far outweighs freedom, and one cannot oppose a gun ban because of the so-called freedom argument", 'url': 'anonymous-source/all_shooting_images_newest/10623.jpg'}, {'emotion': 'Excitement', 'intensity': '3', 'reason': 'it proves that our voices are being heard and governments are responding…
676	I wanted him to feel compassion : The Jewish nurse who treated the synagogue shooting suspect tells his story	anonymous-source/all_shooting_images_newest/110477.jpg	[{'emotion': 'Sadness', 'intensity': '1', 'reason': "I couldn't fully understand the nurse's thoughts, but I could feel her sadness. In my opinion, the criminal should receive punishment, even if there are various objective reasons that cover up his crime", 'url': 'anonymous-source/all_shooting_images_newest/110477.jpg'}, {'emotion': 'Sadness', 'intensity': '5', 'reason': 'a victim should not be …
677	NRA says New York 'blacklisting campaign' is driving it out of business	anonymous-source/all_shooting_images_newest/43.jpg	[{'emotion': 'Excitement', 'intensity': '5', 'reason': "I'm glad to see the NRA's expansion in New York fail, they represent arms dealer interests that seriously compromise the safety of the population and that should be banned by the general public", 'url': 'anonymous-source/all_shooting_images_newest/43.jpg'}, {'emotion': 'Excitement', 'intensity': '4', 'reason': "the NRA defends such disgustin…
680	Mother of Thousand Oaks Victim: I Don t Want Prayers. I Don t Want Thoughts. I Want Gun Control.	anonymous-source/all_shooting_images_newest/110241.jpg	[{'emotion': 'Anger', 'intensity': '5', 'reason': "I completely agree with this woman's statement. Thoughts and prayers can only do so much and it's incredibly frustrating when this kind of thing happens over and over and nothing changes.", 'url': 'anonymous-source/all_shooting_images_newest/110241.jpg'}, {'emotion': 'Sadness', 'intensity': '4', 'reason': "People leaning over their shoulders and …
681	Toomey, Manchin: Trump's call to act on guns 'very encouraging'	anonymous-source/all_shooting_images_newest/10718.jpg	[{'emotion': 'Excitement', 'intensity': '2', 'reason': "I less feel excited but I'm looking forward to the news since it's supposed to be encouraging.", 'url': 'anonymous-source/all_shooting_images_newest/10718.jpg'}, {'emotion': 'Excitement', 'intensity': '4', 'reason': "I think the gun ban is reasonable so I'm happy about that", 'url': 'anonymous-source/all_shooting_images_newest/10718.jpg'}, {…
686	Condolences Aren't Enough.' The Gaming Community Responds After Deadly Jacksonville Madden Shooting	anonymous-source/all_shooting_images_newest/170.jpg	[{'emotion': 'Anger', 'intensity': '5', 'reason': "I agree that condolences really aren't enough in this situation and it makes me angry that this happens over and over and people still struggle to take action and do something about it.", 'url': 'anonymous-source/all_shooting_images_newest/170.jpg'}, {'emotion': 'Sadness', 'intensity': '4', 'reason': "sad for people's death", 'url': 'anonymous-so…
702	Countywide referendums on midterm election ballot deal with minimum wage, gun dealers	anonymous-source/all_shooting_images_newest/100022.jpg	[{'emotion': 'Fear', 'intensity': '3', 'reason': 'Guns are scary', 'url': 'anonymous-source/all_shooting_images_newest/100022.jpg'}, {'emotion': 'Contentment', 'intensity': '3', 'reason': 'stop of gun dealers', 'url': 'anonymous-source/all_shooting_images_newest/100022.jpg'}, {'emotion': 'Awe', 'intensity': '3', 'reason': 'Important for election', 'url': 'anonymous-source/all_shooting_images_newe…
704	Does the U.S. lead the world in mass shootings?	anonymous-source/all_shooting_images_newest/90350.jpg	[{'emotion': 'Fear', 'intensity': '3', 'reason': 'Guns are scary', 'url': 'anonymous-source/all_shooting_images_newest/90350.jpg'}, {'emotion': 'Fear', 'intensity': '3', 'reason': 'could happen ', 'url': 'anonymous-source/all_shooting_images_newest/90350.jpg'}, {'emotion': 'Fear', 'intensity': '4', 'reason': 'Fear about the power of gun', 'url': 'anonymous-source/all_shooting_images_newest/90350.…
710	Another day of funerals as Pittsburgh mourns synagogue shooting victims	anonymous-source/all_shooting_images_newest/110143.jpg	[{'emotion': 'Fear', 'intensity': '3', 'reason': 'Guns are scary', 'url': 'anonymous-source/all_shooting_images_newest/110143.jpg'}, {'emotion': 'Sadness', 'intensity': '5', 'reason': 'feeling sad for all the people who passed away (helpless)', 'url': 'anonymous-source/all_shooting_images_newest/110143.jpg'}, {'emotion': 'Sadness', 'intensity': '5', 'reason': 'They looks very sad', 'url': 'anonym…
713	Gun rights group pulls endorsement for GOP candidate over criticism of 3D printed guns	anonymous-source/all_shooting_images_newest/78.jpg	[{'emotion': 'Fear', 'intensity': '3', 'reason': 'Guns are scary', 'url': 'anonymous-source/all_shooting_images_newest/78.jpg'}, {'emotion': 'Amusement', 'intensity': '4', 'reason': "can't understand what the endorsement is really about", 'url': 'anonymous-source/all_shooting_images_newest/78.jpg'}, {'emotion': 'Amusement', 'intensity': '3', 'reason': 'It is a great sign', 'url': 'anonymous-sourc…
723	A year after Vegas shooting, ATF emails reveal blame, alarm over bump stocks	anonymous-source/all_shooting_images_newest/100084.jpg	[{'emotion': 'Fear', 'intensity': '3', 'reason': "I'm not really sure what this article is talking about ", 'url': 'anonymous-source/all_shooting_images_newest/100084.jpg'}, {'emotion': 'Contentment', 'intensity': '3', 'reason': "it's back on track", 'url': 'anonymous-source/all_shooting_images_newest/100084.jpg'}, {'emotion': 'Sadness', 'intensity': '1', 'reason': 'I do not know what the ATF is,…
725	Why High School Kids Are Better Than Adults at Talking About Guns	anonymous-source/all_shooting_images_newest/10731.jpg	[{'emotion': 'Sadness', 'intensity': '3', 'reason': 'sad that this is the reality, hopeful for the future generation of leaders ', 'url': 'anonymous-source/all_shooting_images_newest/10731.jpg'}, {'emotion': 'Excitement', 'intensity': '3', 'reason': 'high school students are tend to speak more', 'url': 'anonymous-source/all_shooting_images_newest/10731.jpg'}, {'emotion': 'Awe', 'intensity': '4', …
726	Protesters say security guard Jemel Roberson was proverbial 'good guy with a gun' but was fatally shot by police anyway - Daily Southtown	anonymous-source/all_shooting_images_newest/110197.jpg	[{'emotion': 'Fear', 'intensity': '4', 'reason': 'exhibits the racism that continues to plague American society ', 'url': 'anonymous-source/all_shooting_images_newest/110197.jpg'}, {'emotion': 'Sadness', 'intensity': '3', 'reason': 'he has been shot', 'url': 'anonymous-source/all_shooting_images_newest/110197.jpg'}, {'emotion': 'Sadness', 'intensity': '5', 'reason': 'It is exhausting seeing peopl…
730	Vegas shooting survivors describe year of change, challenges	anonymous-source/all_shooting_images_newest/90160.jpg	[{'emotion': 'Sadness', 'intensity': '3', 'reason': 'sad to think about the profound repercussions of a shooting ', 'url': 'anonymous-source/all_shooting_images_newest/90160.jpg'}, {'emotion': 'Sadness', 'intensity': '3', 'reason': 'people who have not survived do not have the chance to see the world', 'url': 'anonymous-source/all_shooting_images_newest/90160.jpg'}, {'emotion': 'Awe', 'intensity'…
731	After shooting, Texas Governor Greg Abbott calls for action	anonymous-source/all_shooting_images_newest/10538.jpg	[{'emotion': 'Contentment', 'intensity': '3', 'reason': 'we should be more proactive, change should not be in response but these initiates should happen earlier ', 'url': 'anonymous-source/all_shooting_images_newest/10538.jpg'}, {'emotion': 'Contentment', 'intensity': '3', 'reason': 'there is action', 'url': 'anonymous-source/all_shooting_images_newest/10538.jpg'}, {'emotion': 'Anger', 'intensity…
736	Vigil held for victims of California bar shooting	anonymous-source/all_shooting_images_newest/110235.jpg	[{'emotion': 'Sadness', 'intensity': '4', 'reason': 'how many more vigils will be have until the violence stops ', 'url': 'anonymous-source/all_shooting_images_newest/110235.jpg'}, {'emotion': 'Sadness', 'intensity': '3', 'reason': 'many people died', 'url': 'anonymous-source/all_shooting_images_newest/110235.jpg'}, {'emotion': 'Sadness', 'intensity': '5', 'reason': 'i feel sorry for those mourni…
739	Police: Florida man threatened to shoot 'weak Republicans' who voted against Kavanaugh confirmation	anonymous-source/all_shooting_images_newest/100252.jpg	[{'emotion': 'Sadness', 'intensity': '3', 'reason': 'no matter what the others support, they should not be in danger just because of their political opinion', 'url': 'anonymous-source/all_shooting_images_newest/100252.jpg'}, {'emotion': 'Disgust', 'intensity': '4', 'reason': 'threatening others let alone with gun is disgusting', 'url': 'anonymous-source/all_shooting_images_newest/100252.jpg'}, {'…
740	Unbearable grief': Pakistani parents of Santa Fe school shooting victim warn of gun culture in US	anonymous-source/all_shooting_images_newest/110117.jpg	[{'emotion': 'Sadness', 'intensity': '3', 'reason': 'because i think there will be subtle impact and things never stop', 'url': 'anonymous-source/all_shooting_images_newest/110117.jpg'}, {'emotion': 'Sadness', 'intensity': '4', 'reason': 'sad and angry because gun violence continues to break families', 'url': 'anonymous-source/all_shooting_images_newest/110117.jpg'}, {'emotion': 'Sadness', 'inten…
743	Don't panic about 3D gun printing. Yet.	anonymous-source/all_shooting_images_newest/27.jpg	[{'emotion': 'Amusement', 'intensity': '3', 'reason': 'sounds like a scientific article that shares recent fun facts on 3d printing. ', 'url': 'anonymous-source/all_shooting_images_newest/27.jpg'}, {'emotion': 'Fear', 'intensity': '3', 'reason': 'soon available technology that makes gun control more difficult', 'url': 'anonymous-source/all_shooting_images_newest/27.jpg'}, {'emotion': 'Fear', 'int…
751	Trump meets with families of victims of Texas shooting to listen and learn	anonymous-source/all_shooting_images_newest/10670.jpg	[{'emotion': 'Disgust', 'intensity': '2', 'reason': "earning votes from Texas. well, that's part of his job", 'url': 'anonymous-source/all_shooting_images_newest/10670.jpg'}, {'emotion': 'Contentment', 'intensity': '3', 'reason': 'slightly angry as the thought of being a purely political move, aka no actions will be taken exist. However, at face value is a good thing and voices of the victims are…
753	3D-printed gun maker says he's selling blueprints, despite court order against him	anonymous-source/all_shooting_images_newest/36.jpg	[{'emotion': 'Disgust', 'intensity': '5', 'reason': 'apparantly a bad liar', 'url': 'anonymous-source/all_shooting_images_newest/36.jpg'}, {'emotion': 'Fear', 'intensity': '3', 'reason': 'a conscious decision to distribute dangerous intellectual property should be a crime in itself', 'url': 'anonymous-source/all_shooting_images_newest/36.jpg'}, {'emotion': 'Anger', 'intensity': '3', 'reason': "St…
754	California Gov. Jerry Brown signs bill banning gun sales to people under 21, citing Parkland	anonymous-source/all_shooting_images_newest/90282.jpg	[{'emotion': 'Contentment', 'intensity': '2', 'reason': 'at least can alleviate the situation', 'url': 'anonymous-source/all_shooting_images_newest/90282.jpg'}, {'emotion': 'Excitement', 'intensity': '4', 'reason': 'tangible step forward for gun control', 'url': 'anonymous-source/all_shooting_images_newest/90282.jpg'}, {'emotion': 'Amusement', 'intensity': '3', 'reason': 'You shouldnt have gun wh…
759	Family outraged after police kill black man mistaken for mall shooter	anonymous-source/all_shooting_images_newest/110433.jpg	[{'emotion': 'Anger', 'intensity': '5', 'reason': "This happens too often & highlights the depth of racism in the US. It's murder and it get excused. ", 'url': 'anonymous-source/all_shooting_images_newest/110433.jpg'}, {'emotion': 'Anger', 'intensity': '3', 'reason': 'Reading about something like this makes me angry.', 'url': 'anonymous-source/all_shooting_images_newest/110433.jpg'}, {'emotion': …
761	Marco Rubio, Bill Nelson push states to get gun restraining order laws	anonymous-source/all_shooting_images_newest/10802.jpg	[{'emotion': 'Contentment', 'intensity': '4', 'reason': "There needs to be change on federal levels, that's where the change will be truly implemented. ", 'url': 'anonymous-source/all_shooting_images_newest/10802.jpg'}, {'emotion': 'Sadness', 'intensity': '3', 'reason': 'What will these proposed laws do?', 'url': 'anonymous-source/all_shooting_images_newest/10802.jpg'}, {'emotion': 'Contentment',…
762	In debate with J.B. Pritzker, Gov. Bruce Rauner says illegal immigration contributes to Chicago gun violence	anonymous-source/all_shooting_images_newest/100222.jpg	[{'emotion': 'Awe', 'intensity': '4', 'reason': "This is interesting but the issue is not rooted in immigration, it's in gun control. ", 'url': 'anonymous-source/all_shooting_images_newest/100222.jpg'}, {'emotion': 'Anger', 'intensity': '3', 'reason': "As far as I know this governor's assumption is false.", 'url': 'anonymous-source/all_shooting_images_newest/100222.jpg'}, {'emotion': 'Disgust', '…
763	U.S. judge extends ban of online 3-D printed gun blueprints	anonymous-source/all_shooting_images_newest/260.jpg	[{'emotion': 'Contentment', 'intensity': '4', 'reason': 'Gun control being implemented in new technology, not just the surface level. ', 'url': 'anonymous-source/all_shooting_images_newest/260.jpg'}, {'emotion': 'Sadness', 'intensity': '3', 'reason': "I'm still confused and uninformed about 3D printed guns. I know what they are, but I'm not sure what the solution to them is.", 'url': 'anonymous-s…
775	Parkland students sent letter of support from Dunblane shooting massacre survivors	anonymous-source/all_shooting_images_newest/10221.jpg	[{'emotion': 'Sadness', 'intensity': '4', 'reason': "It's terrible that young people share this kind of trauma", 'url': 'anonymous-source/all_shooting_images_newest/10221.jpg'}, {'emotion': 'Sadness', 'intensity': '3', 'reason': 'Survivors of gun violence comforting other survivors of gun violence. The whole situation is awful.', 'url': 'anonymous-source/all_shooting_images_newest/10221.jpg'}, {'…
778	The suspected Pittsburgh shooter allegedly had a following on a social network that many call the far-right's alternative to Twitter here's everything we know about Gab	anonymous-source/all_shooting_images_newest/100307.jpg	[{'emotion': 'Fear', 'intensity': '4', 'reason': 'Social media drives a lot of these people to commit shootings. It is easy to convince delusional people on social networks', 'url': 'anonymous-source/all_shooting_images_newest/100307.jpg'}, {'emotion': 'Sadness', 'intensity': '3', 'reason': 'Reading about things like this makes me sad.', 'url': 'anonymous-source/all_shooting_images_newest/100307.…
780	For Parents of Shooting Victims, a Support Network That Keeps Growing	anonymous-source/all_shooting_images_newest/10483.jpg	[{'emotion': 'Contentment', 'intensity': '2', 'reason': 'I think that in the case of network development, the way of interconnection can help cases more quickly.', 'url': 'anonymous-source/all_shooting_images_newest/10483.jpg'}, {'emotion': 'Anger', 'intensity': '3', 'reason': 'Answered previously it just refreshed', 'url': 'anonymous-source/all_shooting_images_newest/10483.jpg'}, {'emotion': 'Sa…
782	Feinstein distorted facts about AR-15, aka 'America's rifle,' NRA says	anonymous-source/all_shooting_images_newest/90026.jpg	[{'emotion': 'Anger', 'intensity': '4', 'reason': 'I think people should have a clear understanding of the case.', 'url': 'anonymous-source/all_shooting_images_newest/90026.jpg'}, {'emotion': 'Fear', 'intensity': '3', 'reason': 'Answered previously it just refreshed', 'url': 'anonymous-source/all_shooting_images_newest/90026.jpg'}, {'emotion': 'Anger', 'intensity': '3', 'reason': 'the facts are d…
783	Florida sheriff: The Parkland massacre could have been avoided if someone else had a gun	anonymous-source/all_shooting_images_newest/373.jpg	[{'emotion': 'Sadness', 'intensity': '3', 'reason': 'I think the case can be avoided. gun control should be strengthened.', 'url': 'anonymous-source/all_shooting_images_newest/373.jpg'}, {'emotion': 'Anger', 'intensity': '3', 'reason': 'Answered previously it just refreshed', 'url': 'anonymous-source/all_shooting_images_newest/373.jpg'}, {'emotion': 'Sadness', 'intensity': '4', 'reason': 'the sho…
786	Las Vegas shooting victims honored in emotional anniversary ceremony: 'Our 58 angels are with us'	anonymous-source/all_shooting_images_newest/100497.jpg	[{'emotion': 'Awe', 'intensity': '2', 'reason': 'I think their sacrifices will be remembered and they deserve to be honored.', 'url': 'anonymous-source/all_shooting_images_newest/100497.jpg'}, {'emotion': 'Excitement', 'intensity': '3', 'reason': 'Answered previously it just refreshed', 'url': 'anonymous-source/all_shooting_images_newest/100497.jpg'}, {'emotion': 'Sadness', 'intensity': '4', 'rea…
791	Senators offer bill that could block gun sales to people seen as risks	anonymous-source/all_shooting_images_newest/10497.jpg	[{'emotion': 'Contentment', 'intensity': '2', 'reason': 'Tragedy can be reduced for people who manage their use of firearms.', 'url': 'anonymous-source/all_shooting_images_newest/10497.jpg'}, {'emotion': 'Disgust', 'intensity': '3', 'reason': 'Answered previously it just refreshed', 'url': 'anonymous-source/all_shooting_images_newest/10497.jpg'}, {'emotion': 'Excitement', 'intensity': '3', 'reaso…
794	Inside the NRA s annual meeting: Guns, ammunition, family and politics	anonymous-source/all_shooting_images_newest/10231.jpg	[{'emotion': 'Fear', 'intensity': '4', 'reason': 'I think people should be more strict about the plumbing of guns.', 'url': 'anonymous-source/all_shooting_images_newest/10231.jpg'}, {'emotion': 'Sadness', 'intensity': '3', 'reason': 'Answered previously it just refreshed', 'url': 'anonymous-source/all_shooting_images_newest/10231.jpg'}, {'emotion': 'Sadness', 'intensity': '3', 'reason': "it's abo…
795	Why some schools are suspending kids for joining gun control walkouts	anonymous-source/all_shooting_images_newest/10661.jpg	[{'emotion': 'Excitement', 'intensity': '2', 'reason': 'Help people better through different voices.', 'url': 'anonymous-source/all_shooting_images_newest/10661.jpg'}, {'emotion': 'Sadness', 'intensity': '3', 'reason': 'Answered previously it just refreshed', 'url': 'anonymous-source/all_shooting_images_newest/10661.jpg'}, {'emotion': 'Anger', 'intensity': '3', 'reason': 'students have the right …
796	Temple Israel, Gary community mourns Pittsburgh shooting victims: 'We come together to condemn the violence and hate'	anonymous-source/all_shooting_images_newest/110007.jpg	[{'emotion': 'Awe', 'intensity': '2', 'reason': 'I think people will pay more attention to this press and better provide a comfortable environment to live in.', 'url': 'anonymous-source/all_shooting_images_newest/110007.jpg'}, {'emotion': 'Disgust', 'intensity': '3', 'reason': 'Answered previously it just refreshed', 'url': 'anonymous-source/all_shooting_images_newest/110007.jpg'}, {'emotion': 'S…
803	Calstrs to Engage With Assault-Weapon Sellers First, Divest Last	anonymous-source/all_shooting_images_newest/10063.jpg	[{'emotion': 'Disgust', 'intensity': '1', 'reason': "I'd rather just not support gun sellers at all.", 'url': 'anonymous-source/all_shooting_images_newest/10063.jpg'}, {'emotion': 'Anger', 'intensity': '3', 'reason': "divest shouldn't be last under any circumstances ", 'url': 'anonymous-source/all_shooting_images_newest/10063.jpg'}, {'emotion': 'Fear', 'intensity': '2', 'reason': 'Do not really u…
804	People across the country come together to condemn gun violence Video	anonymous-source/all_shooting_images_newest/10227.jpg	[{'emotion': 'Contentment', 'intensity': '1', 'reason': 'people recognize what an issue gun violence is and are standing together to protest it.', 'url': 'anonymous-source/all_shooting_images_newest/10227.jpg'}, {'emotion': 'Excitement', 'intensity': '4', 'reason': 'it feels like change is happening', 'url': 'anonymous-source/all_shooting_images_newest/10227.jpg'}, {'emotion': 'Excitement', 'inte…
805	Pittsburgh Steelers to hold moment of silence to honor victims of synagogue shooting	anonymous-source/all_shooting_images_newest/100151.jpg	[{'emotion': 'Sadness', 'intensity': '3', 'reason': 'shooting related deaths are unnecessary and preventable.', 'url': 'anonymous-source/all_shooting_images_newest/100151.jpg'}, {'emotion': 'Excitement', 'intensity': '4', 'reason': "athlete's are using their power for good", 'url': 'anonymous-source/all_shooting_images_newest/100151.jpg'}, {'emotion': 'Sadness', 'intensity': '5', 'reason': 'Direc…
807	Texas state lawmaker shares image linking gun control to the Holocaust	anonymous-source/all_shooting_images_newest/10530.jpg	[{'emotion': 'Disgust', 'intensity': '5', 'reason': 'the fact that it is a person in power that shared this deplorable analogy is even more disgusting; they are in no way comparable.', 'url': 'anonymous-source/all_shooting_images_newest/10530.jpg'}, {'emotion': 'Disgust', 'intensity': '3', 'reason': 'these two things are completely different', 'url': 'anonymous-source/all_shooting_images_newest/1…
812	Democratic state gains may mean tighter gun, looser pot laws	anonymous-source/all_shooting_images_newest/110339.jpg	[{'emotion': 'Awe', 'intensity': '3', 'reason': 'it seems like that is the way the world is trending, with the decriminalization of drugs and tighter gun control laws.', 'url': 'anonymous-source/all_shooting_images_newest/110339.jpg'}, {'emotion': 'Excitement', 'intensity': '4', 'reason': 'people are starting to realize what the true problems in this world are', 'url': 'anonymous-source/all_shoot…
813	Limited engagement: Top funds backed gunmaker Ruger board despite no talks	anonymous-source/all_shooting_images_newest/88.jpg	[{'emotion': 'Anger', 'intensity': '4', 'reason': 'I do not like this topic. Image is confusing.', 'url': 'anonymous-source/all_shooting_images_newest/88.jpg'}, {'emotion': 'Disgust', 'intensity': '3', 'reason': 'it seems big corporate entities really have no morals.', 'url': 'anonymous-source/all_shooting_images_newest/90093.jpg'}, {'emotion': 'Fear', 'intensity': '2', 'reason': "I don't think I…
816	Santa Fe High School had armed cops and active shooter drills. Yet 10 people died.	anonymous-source/all_shooting_images_newest/10160.jpg	[{'emotion': 'Sadness', 'intensity': '3', 'reason': 'a school shooting is traumatizing and unnecessary. ', 'url': 'anonymous-source/all_shooting_images_newest/10160.jpg'}, {'emotion': 'Sadness', 'intensity': '4', 'reason': "we can prepare all we want but it's no match for the real thing when it happens", 'url': 'anonymous-source/all_shooting_images_newest/10160.jpg'}, {'emotion': 'Sadness', 'inte…
818	The CMA Awards open with a moment of silence for the 12 people killed in Thousand Oaks shooting	anonymous-source/all_shooting_images_newest/110439.jpg	[{'emotion': 'Sadness', 'intensity': '3', 'reason': 'it is sad simply because people died.', 'url': 'anonymous-source/all_shooting_images_newest/110439.jpg'}, {'emotion': 'Excitement', 'intensity': '4', 'reason': 'people are honoring and respecting the lives lost', 'url': 'anonymous-source/all_shooting_images_newest/110439.jpg'}, {'emotion': 'Sadness', 'intensity': '2', 'reason': 'Picture does no…
821	Guns, Crime and Freedom': The NRA Book That Turned a Young Stephen Miller Into a Conservative	anonymous-source/all_shooting_images_newest/169.jpg	[{'emotion': 'Disgust', 'intensity': '4', 'reason': 'the title makes me feel weird since it does not align with my views.', 'url': 'anonymous-source/all_shooting_images_newest/169.jpg'}, {'emotion': 'Contentment', 'intensity': '3', 'reason': 'use of guns should be regarded', 'url': 'anonymous-source/all_shooting_images_newest/169.jpg'}, {'emotion': 'Fear', 'intensity': '4', 'reason': 'The influen…
822	Republican Governor Blames Mass Shootings On Zombies, Abortions, US 'Culture of Death' Not Guns	anonymous-source/all_shooting_images_newest/110152.jpg	[{'emotion': 'Amusement', 'intensity': '3', 'reason': "I don't understand how this is connected. I would want to read more.", 'url': 'anonymous-source/all_shooting_images_newest/110152.jpg'}, {'emotion': 'Anger', 'intensity': '3', 'reason': 'guns should be prohibited', 'url': 'anonymous-source/all_shooting_images_newest/110152.jpg'}, {'emotion': 'Disgust', 'intensity': '4', 'reason': 'Excuses tha…
829	BlackRock and Vanguard fought for gun changes yet rubber stamped Sturm Ruger's board	anonymous-source/all_shooting_images_newest/163.jpg	[{'emotion': 'Fear', 'intensity': '4', 'reason': "I don't understand the title.", 'url': 'anonymous-source/all_shooting_images_newest/163.jpg'}, {'emotion': 'Sadness', 'intensity': '3', 'reason': 'i feel sad.', 'url': 'anonymous-source/all_shooting_images_newest/163.jpg'}, {'emotion': 'Contentment', 'intensity': '4', 'reason': 'Blackrock and Vanguard tried', 'url': 'anonymous-source/all_shooting_…
831	Gun control, teacher groups threaten legal action against DeVos gun funding proposal	anonymous-source/all_shooting_images_newest/183.jpg	[{'emotion': 'Excitement', 'intensity': '4', 'reason': 'I am interested in the topic and want to read more.', 'url': 'anonymous-source/all_shooting_images_newest/183.jpg'}, {'emotion': 'Contentment', 'intensity': '3', 'reason': 'gun should be prohibited.', 'url': 'anonymous-source/all_shooting_images_newest/183.jpg'}, {'emotion': 'Amusement', 'intensity': '4', 'reason': 'Teachers are taking a sta…
834	N.Y. governor says schools should drop any punishment given to kids who joined gun violence protests	anonymous-source/all_shooting_images_newest/10204.jpg	[{'emotion': 'Contentment', 'intensity': '4', 'reason': 'I like the title and find interest in this.', 'url': 'anonymous-source/all_shooting_images_newest/10204.jpg'}, {'emotion': 'Contentment', 'intensity': '3', 'reason': 'i agree with this', 'url': 'anonymous-source/all_shooting_images_newest/10204.jpg'}, {'emotion': 'Amusement', 'intensity': '5', 'reason': 'Freedom of speech', 'url': 'anonymou…
843	Why Was the State Department Ever Involved With the Debate Over 3D-Printed Guns?	anonymous-source/all_shooting_images_newest/352.jpg	[{'emotion': 'Fear', 'intensity': '5', 'reason': 'the image of the gun takes my attention away from the involvement of the State Department', 'url': 'anonymous-source/all_shooting_images_newest/352.jpg'}, {'emotion': 'Fear', 'intensity': '3', 'reason': 'The State Department does wield more power than it should.', 'url': 'anonymous-source/all_shooting_images_newest/352.jpg'}, {'emotion': 'Fear', '…
858	Mom with 'gut feeling' stops school shooter before planned attack	anonymous-source/all_shooting_images_newest/100374.jpg	[{'emotion': 'Sadness', 'intensity': '2', 'reason': 'Although the children were safe, it is upsetting that that is something they need to be worried about ', 'url': 'anonymous-source/all_shooting_images_newest/100374.jpg'}, {'emotion': 'Awe', 'intensity': '1', 'reason': 'Good for her!', 'url': 'anonymous-source/all_shooting_images_newest/100374.jpg'}, {'emotion': 'Awe', 'intensity': '3', 'reason'…
860	Somber tributes, dimmed lights on Vegas shooting anniversary	anonymous-source/all_shooting_images_newest/100435.jpg	[{'emotion': 'Sadness', 'intensity': '3', 'reason': 'many people were affected by the Vegas events and it is sad to look back upon that day and what happened because so many lives were lost. ', 'url': 'anonymous-source/all_shooting_images_newest/100435.jpg'}, {'emotion': 'Contentment', 'intensity': '4', 'reason': 'I think this is gratifying news because survivors are very optimistic. On the other…
861	Trump leaves lawmakers hanging on gun priorities	anonymous-source/all_shooting_images_newest/10637.jpg	[{'emotion': 'Disgust', 'intensity': '2', 'reason': 'gun laws should be more of a priority I think and the fact that a President is almost dismissing them is aggravating. ', 'url': 'anonymous-source/all_shooting_images_newest/10637.jpg'}, {'emotion': 'Contentment', 'intensity': '3', 'reason': 'I feel happy because the Florida governor is paying attention to the school shooting issues.', 'url': 'a…
862	California governor signs raft of gun control bills into law	anonymous-source/all_shooting_images_newest/90422.jpg	[{'emotion': 'Contentment', 'intensity': '4', 'reason': 'it is good that gun control laws are being in place, but I want to really see is news saying that the laws are working and we can see changes.', 'url': 'anonymous-source/all_shooting_images_newest/90422.jpg'}, {'emotion': 'Sadness', 'intensity': '3', 'reason': 'I feel worried about how many innocent people may have died due to assault weapo…
863	Carrying a gun is a privilege regardless of whether you're a civilian or a police officer - Chicago Tribune	anonymous-source/all_shooting_images_newest/110460.jpg	[{'emotion': 'Contentment', 'intensity': '3', 'reason': 'I feel satisfied because I agree with this headline, and historically speaking it is known that guns are misused by civilians and police officers, which is why it is a privilege. ', 'url': 'anonymous-source/all_shooting_images_newest/110460.jpg'}, {'emotion': 'Fear', 'intensity': '3', 'reason': 'There are many armed forces, which means the …
864	There's not a 'snowflake's chance in hell' of repealing the Second Amendment	anonymous-source/all_shooting_images_newest/10862.jpg	[{'emotion': 'Anger', 'intensity': '3', 'reason': "the effects of gun violence have devastated communities globally, and it's hard to read that legal action may not fix it.", 'url': 'anonymous-source/all_shooting_images_newest/10862.jpg'}, {'emotion': 'Awe', 'intensity': '3', 'reason': 'I feel gratified because many people are trying to find a balance between these issues.', 'url': 'anonymous-sou…
865	Generation Z reported the most mental health problems, and gun violence is the biggest stressor	anonymous-source/all_shooting_images_newest/100017.jpg	[{'emotion': 'Sadness', 'intensity': '4', 'reason': 'it is true, and it is sad to think that something so easily preventable is the leading cause of mental health stressors in my own generation. ', 'url': 'anonymous-source/all_shooting_images_newest/100017.jpg'}, {'emotion': 'Sadness', 'intensity': '3', 'reason': 'I feel sad for the grieving parents of the teens killed in the Parkland school shoo…
866	Grief and Self-Doubt Follow Shooting at Trenton Arts Festival	anonymous-source/all_shooting_images_newest/10450.jpg	[{'emotion': 'Sadness', 'intensity': '5', 'reason': "Trenton is extremely close to where I live, and it's hard to think of my own community being massively affected by gun violence. ", 'url': 'anonymous-source/all_shooting_images_newest/10450.jpg'}, {'emotion': 'Contentment', 'intensity': '3', 'reason': 'I feel gratified that people are gathering to honor victims of mass shootings. On the other h…
869	Woman Who Reported Racist Facebook Message May Have Prevented a School Shooting	anonymous-source/all_shooting_images_newest/100213.jpg	[{'emotion': 'Sadness', 'intensity': '3', 'reason': "it is relieving to know that a dangerous act was prevented, but it is sad to think that something terrible could have happened if it wasn't for this woman. ", 'url': 'anonymous-source/all_shooting_images_newest/100213.jpg'}, {'emotion': 'Excitement', 'intensity': '3', 'reason': 'I feel excited because this case has gained ground.', 'url': 'anon…
870	Dentist Killed in Pittsburgh Synagogue Shooting Tried to 'Heal the World' With Work Treating Immigrants and Refugees	anonymous-source/all_shooting_images_newest/100437.jpg	[{'emotion': 'Sadness', 'intensity': '4', 'reason': 'it is sad to think that a great person, using their career to do amazing things and help vulnerable people, is gone because of a shooting that should have never happened if gun control laws were more prominent. ', 'url': 'anonymous-source/all_shooting_images_newest/100437.jpg'}, {'emotion': 'Contentment', 'intensity': '4', 'reason': 'I feel hap…
871	Morning Spin: Democrats still looking votes to override Rauner's gun store licensing veto	anonymous-source/all_shooting_images_newest/10648.jpg	[{'emotion': 'Fear', 'intensity': '1', 'reason': "it is fearing to think that another law may make it easier for people to obtain guns. However, I don't have a very intense feeling about this news headline because I do not know who Rauner is or what their gun store licensing veto is about.", 'url': 'anonymous-source/all_shooting_images_newest/10648.jpg'}, {'emotion': 'Fear', 'intensity': '3', 're…
872	Brett Kavanaugh Snubs Father Of Parkland Shooting Victim	anonymous-source/all_shooting_images_newest/90437.jpg	[{'emotion': 'Disgust', 'intensity': '4', 'reason': 'it is disgusting that someone who lost a child to a school shooting was disrespected by a Supreme Court Justice. This father has been through so much and only tried to show respect, yet he was disrespected by someone in high influence. ', 'url': 'anonymous-source/all_shooting_images_newest/90437.jpg'}, {'emotion': 'Fear', 'intensity': '3', 'rea…
878	Miami Students Take Aim At Gun Violence At Do The Right Thing Event	anonymous-source/all_shooting_images_newest/90313.jpg	[{'emotion': 'Contentment', 'intensity': '4', 'reason': 'it is nice to see students pledging to not use violence, and it is nice to see the young generation making actual change. ', 'url': 'anonymous-source/all_shooting_images_newest/90313.jpg'}, {'emotion': 'Awe', 'intensity': '4', 'reason': 'I think this girl is great since she is trying to protect the students during school shootings.', 'url':…
879	White man pulls gun in confrontation with black Florida A&M students	anonymous-source/all_shooting_images_newest/90451.jpg	[{'emotion': 'Disgust', 'intensity': '3', 'reason': 'There is no need to pull out a gun in this situation. ', 'url': 'anonymous-source/all_shooting_images_newest/90451.jpg'}, {'emotion': 'Anger', 'intensity': '5', 'reason': 'the violence between different races', 'url': 'anonymous-source/all_shooting_images_newest/90451.jpg'}, {'emotion': 'Anger', 'intensity': '5', 'reason': 'this man should not …
881	Trump offers plenty of ideas but no concrete plan on guns	anonymous-source/all_shooting_images_newest/10572.jpg	[{'emotion': 'Fear', 'intensity': '3', 'reason': 'It would be more settling if there was more of a plan. ', 'url': 'anonymous-source/all_shooting_images_newest/10572.jpg'}, {'emotion': 'Disgust', 'intensity': '3', 'reason': "Trump's doing nothing with gun", 'url': 'anonymous-source/all_shooting_images_newest/10572.jpg'}, {'emotion': 'Anger', 'intensity': '5', 'reason': 'gun violence should be one…
882	What Kavanaugh said about abortion, guns and presidential pardons	anonymous-source/all_shooting_images_newest/90292.jpg	[{'emotion': 'Awe', 'intensity': '3', 'reason': 'The title is confusing. ', 'url': 'anonymous-source/all_shooting_images_newest/90292.jpg'}, {'emotion': 'Sadness', 'intensity': '3', 'reason': "I feel sad but don't know what is going on", 'url': 'anonymous-source/all_shooting_images_newest/90292.jpg'}, {'emotion': 'Anger', 'intensity': '3', 'reason': 'Kavanaugh does not agree with nor advocate for…
885	Pro-gun advocates are stepping up their attacks on Parkland students David Hogg and Emma Gonz??lez.	anonymous-source/all_shooting_images_newest/10811.jpg	[{'emotion': 'Anger', 'intensity': '3', 'reason': "Just because you are pro-gun, doesn't mean you should go after a survivor of a tragic event. ", 'url': 'anonymous-source/all_shooting_images_newest/10811.jpg'}, {'emotion': 'Anger', 'intensity': '3', 'reason': 'for supporting guns', 'url': 'anonymous-source/all_shooting_images_newest/10811.jpg'}, {'emotion': 'Anger', 'intensity': '5', 'reason': '…
892	Brett Kavanaugh apparently wouldn't shake hands with a Parkland shooting victim's dad	anonymous-source/all_shooting_images_newest/90301.jpg	[{'emotion': 'Disgust', 'intensity': '4', 'reason': 'Just disgraceful and disrespectful.', 'url': 'anonymous-source/all_shooting_images_newest/90301.jpg'}, {'emotion': 'Anger', 'intensity': '3', 'reason': 'gun violence ', 'url': 'anonymous-source/all_shooting_images_newest/90301.jpg'}, {'emotion': 'Disgust', 'intensity': '3', 'reason': "Kavanaugh is a terrible person and should've been honored to…
893	Special FBI team helping investigate South Carolina shooting	anonymous-source/all_shooting_images_newest/100359.jpg	[{'emotion': 'Contentment', 'intensity': '4', 'reason': 'Hopeful that they find more information on who did it or other details. ', 'url': 'anonymous-source/all_shooting_images_newest/100359.jpg'}, {'emotion': 'Contentment', 'intensity': '3', 'reason': 'Gun violence is partly being controlled.', 'url': 'anonymous-source/all_shooting_images_newest/100359.jpg'}, {'emotion': 'Anger', 'intensity': '3…
895	Congress wonders if this time will be different for gun control	anonymous-source/all_shooting_images_newest/10821.jpg	[{'emotion': 'Awe', 'intensity': '3', 'reason': 'The title has me hopeful but curious at the same time as it provokes thought. ', 'url': 'anonymous-source/all_shooting_images_newest/10821.jpg'}, {'emotion': 'Sadness', 'intensity': '3', 'reason': 'the ineffectiveness of gun regulations', 'url': 'anonymous-source/all_shooting_images_newest/10821.jpg'}, {'emotion': 'Sadness', 'intensity': '3', 'reas…
896	Carpenter erects wooden crosses in honor of shooting rampage victims	anonymous-source/all_shooting_images_newest/110405.jpg	[{'emotion': 'Contentment', 'intensity': '5', 'reason': 'The carpenter did it out of respect and that is what makes me content. ', 'url': 'anonymous-source/all_shooting_images_newest/110405.jpg'}, {'emotion': 'Sadness', 'intensity': '3', 'reason': 'for people lost their lives in shooting cases', 'url': 'anonymous-source/all_shooting_images_newest/110405.jpg'}, {'emotion': 'Sadness', 'intensity': …
897	How the NRA undercut the last big gun reform effort	anonymous-source/all_shooting_images_newest/10874.jpg	[{'emotion': 'Contentment', 'intensity': '3', 'reason': 'No real feeling towards the photo. ', 'url': 'anonymous-source/all_shooting_images_newest/10874.jpg'}, {'emotion': 'Anger', 'intensity': '3', 'reason': 'the ineffectiveness of gun regualtions', 'url': 'anonymous-source/all_shooting_images_newest/10874.jpg'}, {'emotion': 'Anger', 'intensity': '3', 'reason': 'I hate the NRA and what it stands…
899	I think I'm going to kill the president,' Utah man allegedly told police after 6 guns found in car: reports	anonymous-source/all_shooting_images_newest/90303.jpg	[{'emotion': 'Fear', 'intensity': '5', 'reason': 'this is a scary situation', 'url': 'anonymous-source/all_shooting_images_newest/90303.jpg'}, {'emotion': 'Fear', 'intensity': '4', 'reason': 'I feel scared when I saw 6 guns were founded in his car, and I feel that he has already planned his murder for a while.', 'url': 'anonymous-source/all_shooting_images_newest/90303.jpg'}, {'emotion': 'Fear', …
903	Court Rules Second Amendment Doesn t Protect AR-15, Assault Rifles and Large-Capacity Magazines	anonymous-source/all_shooting_images_newest/10446.jpg	[{'emotion': 'Excitement', 'intensity': '5', 'reason': "its exciting that a gun ruled that the 2nd amendment doesn't apply to these dangerous weapons", 'url': 'anonymous-source/all_shooting_images_newest/10446.jpg'}, {'emotion': 'Contentment', 'intensity': '4', 'reason': "while the Second Amendment claims that people have rights to keep guns, the amendment still addresses that military weapons sh…
908	White man takes out gun to stop black students from entering apartment building	anonymous-source/all_shooting_images_newest/90385.jpg	[{'emotion': 'Disgust', 'intensity': '5', 'reason': 'this is a disgusting thing to do', 'url': 'anonymous-source/all_shooting_images_newest/90385.jpg'}, {'emotion': 'Anger', 'intensity': '5', 'reason': "even though the 2nd Amendment gives people's right to keep guns, it is not used to threaten others, especially in a world that advocates for equality, it will definitely cause anger when seeing a …
909	1 year after Vegas shooting, survivors describe 'new normal'	anonymous-source/all_shooting_images_newest/90409.jpg	[{'emotion': 'Sadness', 'intensity': '5', 'reason': 'its sad that people were injured and lost their lives in this shooting', 'url': 'anonymous-source/all_shooting_images_newest/90409.jpg'}, {'emotion': 'Sadness', 'intensity': '4', 'reason': 'even though the survivors have survived in the shooting, they feel like they are not secure, since they describe the shootings as "new normal".', 'url': 'an…
920	Moderate Dem governor moves left, supports assault weapons ban as possible 2020 run looms	anonymous-source/all_shooting_images_newest/74.jpg	[{'emotion': 'Excitement', 'intensity': '3', 'reason': 'because it would lead the country to a safer direction.', 'url': 'anonymous-source/all_shooting_images_newest/74.jpg'}, {'emotion': 'Contentment', 'intensity': '3', 'reason': 'Governor is supporting assault weapon ban', 'url': 'anonymous-source/all_shooting_images_newest/74.jpg'}, {'emotion': 'Contentment', 'intensity': '2', 'reason': 'banni…
926	Sean Hannity Blames Maxine Waters, Obama for Newspaper Shooting	anonymous-source/all_shooting_images_newest/10454.jpg	[{'emotion': 'Fear', 'intensity': '1', 'reason': 'I do not understand what this meant', 'url': 'anonymous-source/all_shooting_images_newest/10454.jpg'}, {'emotion': 'Anger', 'intensity': '3', 'reason': 'This headline does not even make sense…', 'url': 'anonymous-source/all_shooting_images_newest/10454.jpg'}, {'emotion': 'Amusement', 'intensity': '2', 'reason': 'Fox News anchor is blaming the demo…
933	These Students Were Told They Couldn't Come Back to School for Protesting Gun Violence	anonymous-source/all_shooting_images_newest/10186.jpg	[{'emotion': 'Sadness', 'intensity': '1', 'reason': "The school is not doing the right thing, and violating the students' rights to go study at school.", 'url': 'anonymous-source/all_shooting_images_newest/10186.jpg'}, {'emotion': 'Anger', 'intensity': '3', 'reason': 'Students should have a right to fight for their beliefs, especially if it involves their safety.', 'url': 'anonymous-source/all_sh…
934	Memorial in downtown Las Vegas honors victims of October shooting rampage	anonymous-source/all_shooting_images_newest/90459.jpg	[{'emotion': 'Sadness', 'intensity': '1', 'reason': 'These kind of activity would help people recognize the impact of having gun in the society', 'url': 'anonymous-source/all_shooting_images_newest/90459.jpg'}, {'emotion': 'Sadness', 'intensity': '3', 'reason': 'Memorial is displaying victims of shooting.', 'url': 'anonymous-source/all_shooting_images_newest/90459.jpg'}, {'emotion': 'Awe', 'inten…
937	This Is Us Emotionally Honors Pittsburgh After Deadly Synagogue Shooting	anonymous-source/all_shooting_images_newest/110367.jpg	[{'emotion': 'Sadness', 'intensity': '1', 'reason': 'I do not understand what this message meant', 'url': 'anonymous-source/all_shooting_images_newest/110367.jpg'}, {'emotion': 'Contentment', 'intensity': '3', 'reason': 'A tv show demonstrated its respects for the lost lives in a shooting.', 'url': 'anonymous-source/all_shooting_images_newest/110367.jpg'}, {'emotion': 'Sadness', 'intensity': '2',…
940	South Carolina congressman draws gun at constituent meeting	anonymous-source/all_shooting_images_newest/10309.jpg	[{'emotion': 'Disgust', 'intensity': '4', 'reason': 'that a government official is supportive of something that causes violence', 'url': 'anonymous-source/all_shooting_images_newest/10309.jpg'}, {'emotion': 'Fear', 'intensity': '5', 'reason': 'it is shocking to see that an official draws a gun at a public event and makes me scared to live in a country with people who are in charge like that', 'ur…
949	Smith & Wesson revenue from long-gun sales fell 50 percent this year: report	anonymous-source/all_shooting_images_newest/200.jpg	[{'emotion': 'Excitement', 'intensity': '3', 'reason': 'I feel like that the revenue loss caused me to feel contentment that less people are buying guns which means less violence is occruing', 'url': 'anonymous-source/all_shooting_images_newest/200.jpg'}, {'emotion': 'Contentment', 'intensity': '4', 'reason': 'it is nice to hear that there is a decrease in gun sales because i feel more safe less …
954	Do Gun Control Laws Save Lives? Major Study Says Lack Of Federal Funding For Research Means We Still Don't Know	anonymous-source/all_shooting_images_newest/10394.jpg	[{'emotion': 'Fear', 'intensity': '4', 'reason': 'without any gun control laws, people are losing their lives and even with advocating its not wokring', 'url': 'anonymous-source/all_shooting_images_newest/10394.jpg'}, {'emotion': 'Sadness', 'intensity': '4', 'reason': 'it is sad to hear that there is not much aid and support for gun control laws and it is causing many deaths', 'url': 'anonymous-s…
955	Pittsburgh synagogue gunman said he wanted all Jews to die, criminal complaint says	anonymous-source/all_shooting_images_newest/100354.jpg	[{'emotion': 'Sadness', 'intensity': '4', 'reason': 'as a jew I feel really connected and scared to further gun acts that can occur', 'url': 'anonymous-source/all_shooting_images_newest/100354.jpg'}, {'emotion': 'Sadness', 'intensity': '4', 'reason': 'it is sad to see how so many people suffered and were victims just because a gunman had a racist opinion ', 'url': 'anonymous-source/all_shooting_i…
961	Man Accused of Threatening to Shoot Donald Trump Arrested After Months-Long Manhunt	anonymous-source/all_shooting_images_newest/90137.jpg	[{'emotion': 'Amusement', 'intensity': '2', 'reason': "Trump's face and the headline combo is slightly ironic.", 'url': 'anonymous-source/all_shooting_images_newest/90137.jpg'}, {'emotion': 'Contentment', 'intensity': '3', 'reason': "I'm satisfied with the result.", 'url': 'anonymous-source/all_shooting_images_newest/90137.jpg'}, {'emotion': 'Sadness', 'intensity': '3', 'reason': 'It is upsetting…
962	Shootings Thrust Gun Control Into Campaign Ads	anonymous-source/all_shooting_images_newest/90226.jpg	[{'emotion': 'Fear', 'intensity': '3', 'reason': "Feels like there's a mismatch between headline and photo.", 'url': 'anonymous-source/all_shooting_images_newest/90226.jpg'}, {'emotion': 'Contentment', 'intensity': '3', 'reason': "I'm satisfied with the result.", 'url': 'anonymous-source/all_shooting_images_newest/90226.jpg'}, {'emotion': 'Contentment', 'intensity': '3', 'reason': 'gun control ne…
963	Senators introduce bill to block terrorists from buying guns	anonymous-source/all_shooting_images_newest/10265.jpg	[{'emotion': 'Contentment', 'intensity': '2', 'reason': 'I liked the headline but was also slightly scared/confused. This headline evoked further curiosity. ', 'url': 'anonymous-source/all_shooting_images_newest/10265.jpg'}, {'emotion': 'Contentment', 'intensity': '4', 'reason': "I'm satisfied with the result. But I'm also worried about the negative consequences of judging people's guidelines.", …
964	Students have a right to protest gun violence, but they can t disrupt class	anonymous-source/all_shooting_images_newest/10690.jpg	[{'emotion': 'Awe', 'intensity': '4', 'reason': 'Combination of child and sign was powerful, and evoked strong feelings of pride.', 'url': 'anonymous-source/all_shooting_images_newest/10690.jpg'}, {'emotion': 'Anger', 'intensity': '2', 'reason': 'I disagree with the headline.', 'url': 'anonymous-source/all_shooting_images_newest/10690.jpg'}, {'emotion': 'Anger', 'intensity': '4', 'reason': 'Stude…
965	Rams to honor first responders and victims of wildfires, mass shooting at game Monday - Los Angeles Times	anonymous-source/all_shooting_images_newest/110099.jpg	[{'emotion': 'Sadness', 'intensity': '4', 'reason': 'Facial expressions and hand-holding evoked sadness.', 'url': 'anonymous-source/all_shooting_images_newest/110099.jpg'}, {'emotion': 'Sadness', 'intensity': '4', 'reason': "I'm sorry for what they have been thorugh", 'url': 'anonymous-source/all_shooting_images_newest/110099.jpg'}, {'emotion': 'Disgust', 'intensity': '4', 'reason': 'In an attemp…
969	The Trump Slump : With a Friend in the White House, Gun Sales Sag	anonymous-source/all_shooting_images_newest/314.jpg	[{'emotion': 'Contentment', 'intensity': '3', 'reason': 'Made me slightly curious about how trump has caused gun sales to decrease.', 'url': 'anonymous-source/all_shooting_images_newest/314.jpg'}, {'emotion': 'Fear', 'intensity': '2', 'reason': "I'm afraid of guns", 'url': 'anonymous-source/all_shooting_images_newest/314.jpg'}, {'emotion': 'Fear', 'intensity': '4', 'reason': 'Why are sales going …
970	President Trump's school safety commission will not be looking at role of guns, chair says	anonymous-source/all_shooting_images_newest/10518.jpg	[{'emotion': 'Anger', 'intensity': '4', 'reason': 'Angered at the callousness of headline and the image.', 'url': 'anonymous-source/all_shooting_images_newest/10518.jpg'}, {'emotion': 'Anger', 'intensity': '2', 'reason': "I'm not satisfied with the result.", 'url': 'anonymous-source/all_shooting_images_newest/10518.jpg'}, {'emotion': 'Anger', 'intensity': '5', 'reason': 'School shootings are only…
971	Watchdog groups to file complaint against Montana candidate alleging coordination with NRA	anonymous-source/all_shooting_images_newest/90138.jpg	[{'emotion': 'Contentment', 'intensity': '3', 'reason': 'Want to learn more about how the story will develop.', 'url': 'anonymous-source/all_shooting_images_newest/90138.jpg'}, {'emotion': 'Contentment', 'intensity': '3', 'reason': "I'm satisfied with the result.", 'url': 'anonymous-source/all_shooting_images_newest/90138.jpg'}, {'emotion': 'Contentment', 'intensity': '4', 'reason': 'I understand…
976	NRA losing corporate ties amid calls for boycott in wake of Parkland shooting	anonymous-source/all_shooting_images_newest/10403.jpg	[{'emotion': 'Contentment', 'intensity': '3', 'reason': 'Supported statement but picture was not compelling.', 'url': 'anonymous-source/all_shooting_images_newest/10403.jpg'}, {'emotion': 'Contentment', 'intensity': '2', 'reason': "I'm satisfied with the result.", 'url': 'anonymous-source/all_shooting_images_newest/10403.jpg'}, {'emotion': 'Contentment', 'intensity': '5', 'reason': 'Companies sho…
979	Right and Left React to the Gun Control Debate After the Florida Shooting	anonymous-source/all_shooting_images_newest/10598.jpg	[{'emotion': 'Contentment', 'intensity': '5', 'reason': 'This means a conversation to me rather than a debate. People are talking about their views together. ', 'url': 'anonymous-source/all_shooting_images_newest/10598.jpg'}, {'emotion': 'Awe', 'intensity': '4', 'reason': 'that it takes an event such as this to bring the two politcal parties together ', 'url': 'anonymous-source/all_shooting_image…
980	Televised meetings over school shootings are cathartic, but change nothing	anonymous-source/all_shooting_images_newest/10499.jpg	[{'emotion': 'Anger', 'intensity': '5', 'reason': "Honestly trump just makes angry and anything he said brought the country to nothing. All his plans seemed to fall through, I'm not surprised when I hear some stupid shit he says. ", 'url': 'anonymous-source/all_shooting_images_newest/10499.jpg'}, {'emotion': 'Contentment', 'intensity': '4', 'reason': 'i agree with the statement ', 'url': 'anonymo…
985	Pittsburgh holds last funeral in synagogue shooting for oldest victim	anonymous-source/all_shooting_images_newest/110057.jpg	[{'emotion': 'Sadness', 'intensity': '4', 'reason': 'Mainly because this is not the last time this will happen. It will happen again and we will see more funerals and headlines like these. ', 'url': 'anonymous-source/all_shooting_images_newest/110057.jpg'}, {'emotion': 'Sadness', 'intensity': '4', 'reason': 'this event makes hurts deeply. ', 'url': 'anonymous-source/all_shooting_images_newest/110…
986	NRA Chief Defends Gun Rights in Wake of School Shooting	anonymous-source/all_shooting_images_newest/10363.jpg	[{'emotion': 'Disgust', 'intensity': '4', 'reason': "These people only care about themselves and their money. They waste people's time with their hypocritical ideas. ", 'url': 'anonymous-source/all_shooting_images_newest/10363.jpg'}, {'emotion': 'Disgust', 'intensity': '5', 'reason': 'that he would double-down on his beliefs after a tragedy that is fueled by organizations like the NRA. ', 'url': …
989	Opinion | Guns When Trump Can t Even Tweet	anonymous-source/all_shooting_images_newest/10602.jpg	[{'emotion': 'Sadness', 'intensity': '5', 'reason': 'The fact that we expect the president to tweet, not even make a formal speech. ', 'url': 'anonymous-source/all_shooting_images_newest/10602.jpg'}, {'emotion': 'Disgust', 'intensity': '3', 'reason': 'twitter holds that much power.', 'url': 'anonymous-source/all_shooting_images_newest/10602.jpg'}, {'emotion': 'Fear', 'intensity': '4', 'reason': '…
992	No one deserves to die over a video game': survivors recall chaos of Florida shooting	anonymous-source/all_shooting_images_newest/494.jpg	[{'emotion': 'Sadness', 'intensity': '5', 'reason': "This does not have to do with the video games, it seems like it was just a big event which is a great target for a mass shooting. It's about who has access to the guns. ", 'url': 'anonymous-source/all_shooting_images_newest/494.jpg'}, {'emotion': 'Sadness', 'intensity': '3', 'reason': 'i agree with the headline. ', 'url': 'anonymous-source/all_…
993	Military rushed to add 4,000 to gun ban list	anonymous-source/all_shooting_images_newest/10252.jpg	[{'emotion': 'Contentment', 'intensity': '4', 'reason': 'Does this mean that the army is not content with the gun violence and that people are trying to stop it?', 'url': 'anonymous-source/all_shooting_images_newest/10252.jpg'}, {'emotion': 'Contentment', 'intensity': '1', 'reason': "I don't know much progress this is making. ", 'url': 'anonymous-source/all_shooting_images_newest/10252.jpg'}, {'e…
995	Mass shooting victims remembered at Thousand Oaks church service and memorial	anonymous-source/all_shooting_images_newest/110089.jpg	[{'emotion': 'Sadness', 'intensity': '4', 'reason': "Again, this is not the only time this will happen. it will keep happening, that's where my sadness comes from. ", 'url': 'anonymous-source/all_shooting_images_newest/110089.jpg'}, {'emotion': 'Sadness', 'intensity': '5', 'reason': 'i feel for the victims of this horrific event. ', 'url': 'anonymous-source/all_shooting_images_newest/110089.jpg'}…
999	It s never going to be normal': California city in shock after gunman kills 12	anonymous-source/all_shooting_images_newest/110161.jpg	[{'emotion': 'Fear', 'intensity': '3', 'reason': 'Mass producing guns is to be feared, it becomes an easy access to people which is easily mis handled', 'url': 'anonymous-source/all_shooting_images_newest/110161.jpg'}, {'emotion': 'Sadness', 'intensity': '4', 'reason': 'These people were innocent, and to the gunman their lives meant nothing.', 'url': 'anonymous-source/all_shooting_images_newest/1…
1002	How 3-D printed guns are made and the growing security concerns they present	anonymous-source/all_shooting_images_newest/84.jpg	[{'emotion': 'Fear', 'intensity': '3', 'reason': 'Mass producing guns is to be feared, it becomes an easy access to people which is easily mis handled', 'url': 'anonymous-source/all_shooting_images_newest/84.jpg'}, {'emotion': 'Fear', 'intensity': '5', 'reason': 'People can make their own guns now.', 'url': 'anonymous-source/all_shooting_images_newest/84.jpg'}, {'emotion': 'Sadness', 'intensity':…
1005	Florida video game contest shooting reignites gun rights debate	anonymous-source/all_shooting_images_newest/77.jpg	[{'emotion': 'Fear', 'intensity': '3', 'reason': 'Mass producing guns is to be feared, it becomes an easy access to people which is easily mis handled', 'url': 'anonymous-source/all_shooting_images_newest/77.jpg'}, {'emotion': 'Sadness', 'intensity': '4', 'reason': 'You can get meat in the supermarket.', 'url': 'anonymous-source/all_shooting_images_newest/77.jpg'}, {'emotion': 'Sadness', 'intensi…
1012	Those Banned 3D-Printed Gun Files Are Now Available on Another Site. Are They Really Free Speech?	anonymous-source/all_shooting_images_newest/87.jpg	[{'emotion': 'Fear', 'intensity': '3', 'reason': 'Mass producing guns is to be feared, it becomes an easy access to people which is easily mis handled', 'url': 'anonymous-source/all_shooting_images_newest/87.jpg'}, {'emotion': 'Disgust', 'intensity': '2', 'reason': "Free speech ends when it impedes on another's rights (primarily the right to life).", 'url': 'anonymous-source/all_shooting_images_n…
1013	Calif. governor signs bill raising age limit for purchase of long guns from 18 to 21	anonymous-source/all_shooting_images_newest/90461.jpg	[{'emotion': 'Fear', 'intensity': '3', 'reason': 'Mass producing guns is to be feared, it becomes an easy access to people which is easily mis handled', 'url': 'anonymous-source/all_shooting_images_newest/90461.jpg'}, {'emotion': 'Contentment', 'intensity': '1', 'reason': "We're on the right track, I guess.", 'url': 'anonymous-source/all_shooting_images_newest/90461.jpg'}, {'emotion': 'Excitement…
1016	Twitter Users Taunt NRA With 'Thoughts And Prayers'Amid Reports Of Financial Struggles	anonymous-source/all_shooting_images_newest/110475.jpg	[{'emotion': 'Fear', 'intensity': '3', 'reason': 'Mass producing guns is to be feared, it becomes an easy access to people which is easily mis handled', 'url': 'anonymous-source/all_shooting_images_newest/110475.jpg'}, {'emotion': 'Amusement', 'intensity': '2', 'reason': 'Real meta, thoughts and prayers will never solve any problem.', 'url': 'anonymous-source/all_shooting_images_newest/110475.jpg…
1017	Las Vegas pauses but looks ahead a year after mass shooting	anonymous-source/all_shooting_images_newest/100062.jpg	[{'emotion': 'Fear', 'intensity': '3', 'reason': 'Mass producing guns is to be feared, it becomes an easy access to people which is easily mis handled', 'url': 'anonymous-source/all_shooting_images_newest/100062.jpg'}, {'emotion': 'Sadness', 'intensity': '4', 'reason': 'I remember when this shooting happened, it scared me a lot then.', 'url': 'anonymous-source/all_shooting_images_newest/100062.jp…
1019	The Latest: Vegas shooting survivors form human chain	anonymous-source/all_shooting_images_newest/100381.jpg	[{'emotion': 'Sadness', 'intensity': '5', 'reason': 'the Las Vegas shooting is sad', 'url': 'anonymous-source/all_shooting_images_newest/100381.jpg'}, {'emotion': 'Sadness', 'intensity': '3', 'reason': 'people are hugging each other and this action makes me feel mournful for the victims. ', 'url': 'anonymous-source/all_shooting_images_newest/100381.jpg'}, {'emotion': 'Sadness', 'intensity': '5', …
1021	Colorado school shooting victim's father accuses Giffords super PAC ad of 'politicizing' daughter's death	anonymous-source/all_shooting_images_newest/90402.jpg	[{'emotion': 'Sadness', 'intensity': '5', 'reason': 'its sad that someone died in a shooting', 'url': 'anonymous-source/all_shooting_images_newest/90402.jpg'}, {'emotion': 'Anger', 'intensity': '4', 'reason': 'i feel angry and ridiculous. A girl died and the politician is smiling and utilizing her death to make a speech. ', 'url': 'anonymous-source/all_shooting_images_newest/90402.jpg'}, {'emotio…
1024	Gun control group focusing on 15 Republican House districts: report	anonymous-source/all_shooting_images_newest/90398.jpg	[{'emotion': 'Excitement', 'intensity': '5', 'reason': 'its exciting that gun control groups are organizing', 'url': 'anonymous-source/all_shooting_images_newest/90398.jpg'}, {'emotion': 'Excitement', 'intensity': '4', 'reason': 'the crowd of paraders makes me feel power and hope that they are trying to resist gun violence. it brings positive emotion and excitement to me seeing that there are peo…
1029	Shooting at Pittsburgh synagogue widely condemned, deemed 'unconscionable'	anonymous-source/all_shooting_images_newest/100416.jpg	[{'emotion': 'Sadness', 'intensity': '5', 'reason': 'its sad that there was a shooting', 'url': 'anonymous-source/all_shooting_images_newest/100416.jpg'}, {'emotion': 'Sadness', 'intensity': '4', 'reason': "pictures of women and girls crying makes me resonate. reminds me of victim's familes and i feel sorry for them.", 'url': 'anonymous-source/all_shooting_images_newest/100416.jpg'}, {'emotion': …
1031	A Republican Governor Shoots Himself in the Foot	anonymous-source/all_shooting_images_newest/90416.jpg	[{'emotion': 'Contentment', 'intensity': '4', 'reason': 'this seems like Karma', 'url': 'anonymous-source/all_shooting_images_newest/90416.jpg'}, {'emotion': 'Amusement', 'intensity': '3', 'reason': 'the picture looks happy but the news says he shoots himself. i think the picture implies that the news is not very serious and scary, and makes me curious the reason behind. ', 'url': 'anonymous-sour…
1037	Travis Scott honors Vegas shooting victims nearly a year later: 'No one can take this city or this country down, ever!'	anonymous-source/all_shooting_images_newest/90289.jpg	[{'emotion': 'Sadness', 'intensity': '5', 'reason': 'its sad that this shooting happened but also ironic for Travis Scott to address violence when his past encouragement of other types of violence later led to the Astroworld deaths', 'url': 'anonymous-source/all_shooting_images_newest/90289.jpg'}, {'emotion': 'Awe', 'intensity': '2', 'reason': 'it is good that a celebrity speaks up for the victim…
1038	Meet Cody Wilson, the 'crypto-anarchist' who wants you to be able to 3D-print unregulated guns	anonymous-source/all_shooting_images_newest/130.jpg	[{'emotion': 'Fear', 'intensity': '5', 'reason': 'that man is scary, put him on a list ', 'url': 'anonymous-source/all_shooting_images_newest/130.jpg'}, {'emotion': 'Fear', 'intensity': '4', 'reason': '3d printed guns are terrifying for the accessibility and prices of them ', 'url': 'anonymous-source/all_shooting_images_newest/130.jpg'}, {'emotion': 'Fear', 'intensity': '4', 'reason': 'I am afrai…
1045	Steelers hold moment of silence for shooting victims	anonymous-source/all_shooting_images_newest/100499.jpg	[{'emotion': 'Contentment', 'intensity': '2', 'reason': 'used to these types of things ', 'url': 'anonymous-source/all_shooting_images_newest/100499.jpg'}, {'emotion': 'Sadness', 'intensity': '5', 'reason': 'it is sad because there was a shooting and it showed where it happened. ', 'url': 'anonymous-source/all_shooting_images_newest/100499.jpg'}, {'emotion': 'Sadness', 'intensity': '3', 'reason':…
1052	3D-printed guns: Judge blocks release of blueprints for firearms	anonymous-source/all_shooting_images_newest/405.jpg	[{'emotion': 'Contentment', 'intensity': '4', 'reason': 'seems like the obvious move ', 'url': 'anonymous-source/all_shooting_images_newest/405.jpg'}, {'emotion': 'Contentment', 'intensity': '4', 'reason': 'content because blueprints for 3d printed firearms are dangerous, and knowing that judges and people understand that is reassuring. ', 'url': 'anonymous-source/all_shooting_images_newest/405.j…
1059	Pittsburgh synagogue shooting prompts wide outpouring of public support	anonymous-source/all_shooting_images_newest/100315.jpg	[{'emotion': 'Excitement', 'intensity': '3', 'reason': 'Excitement', 'url': 'anonymous-source/all_shooting_images_newest/100315.jpg'}, {'emotion': 'Sadness', 'intensity': '5', 'reason': 'It is extremely sad that so many people were killed in a mass shooting, especially in a synagogue.', 'url': 'anonymous-source/all_shooting_images_newest/100315.jpg'}, {'emotion': 'Awe', 'intensity': '5', 'reason'…
1064	Fair board to consider ban on gun shows at Del Mar Fairgrounds	anonymous-source/all_shooting_images_newest/90277.jpg	[{'emotion': 'Excitement', 'intensity': '3', 'reason': 'Excitement', 'url': 'anonymous-source/all_shooting_images_newest/90277.jpg'}, {'emotion': 'Contentment', 'intensity': '1', 'reason': "At least they're considering it.", 'url': 'anonymous-source/all_shooting_images_newest/90277.jpg'}, {'emotion': 'Contentment', 'intensity': '3', 'reason': 'I feel happy because safety is important ', 'url': 'a…
1065	Active Shooter Game Is Pulled After Angering Parkland Parents	anonymous-source/all_shooting_images_newest/10191.jpg	[{'emotion': 'Excitement', 'intensity': '3', 'reason': 'Excitement', 'url': 'anonymous-source/all_shooting_images_newest/10191.jpg'}, {'emotion': 'Disgust', 'intensity': '1', 'reason': 'At least they pulled it but I feel sad for the parents.', 'url': 'anonymous-source/all_shooting_images_newest/10191.jpg'}, {'emotion': 'Contentment', 'intensity': '5', 'reason': 'This makes me happy because the ga…
1067	Warriors coach fundraising for gun control Brady PAC	anonymous-source/all_shooting_images_newest/90128.jpg	[{'emotion': 'Excitement', 'intensity': '3', 'reason': 'Excitement', 'url': 'anonymous-source/all_shooting_images_newest/90128.jpg'}, {'emotion': 'Awe', 'intensity': '3', 'reason': 'He is fundraising for gun-control, but it is also sad that he is even having to do that.', 'url': 'anonymous-source/all_shooting_images_newest/90128.jpg'}, {'emotion': 'Contentment', 'intensity': '5', 'reason': 'I fee…
1069	Las Vegas shooting: One year later, hundreds of videos traumatize some survivors	anonymous-source/all_shooting_images_newest/100366.jpg	[{'emotion': 'Excitement', 'intensity': '3', 'reason': 'Excitement', 'url': 'anonymous-source/all_shooting_images_newest/100366.jpg'}, {'emotion': 'Fear', 'intensity': '5', 'reason': 'Because that is terrifying that it happened and it is incredibly sad and scary to think about what everyone who was there has gone through.', 'url': 'anonymous-source/all_shooting_images_newest/100366.jpg'}, {'emoti…
1070	Trump says he would have rushed into Florida school without a weapon	anonymous-source/all_shooting_images_newest/10626.jpg	[{'emotion': 'Excitement', 'intensity': '3', 'reason': 'Excitement', 'url': 'anonymous-source/all_shooting_images_newest/10626.jpg'}, {'emotion': 'Disgust', 'intensity': '1', 'reason': 'I am not of Trump.', 'url': 'anonymous-source/all_shooting_images_newest/10626.jpg'}, {'emotion': 'Anger', 'intensity': '3', 'reason': "I feel angry because I don't honestly believe he would have actually done tha…
1071	Sociology professor shoots himself and police say he did it to protest Trump	anonymous-source/all_shooting_images_newest/90384.jpg	[{'emotion': 'Excitement', 'intensity': '3', 'reason': 'Excitement', 'url': 'anonymous-source/all_shooting_images_newest/90384.jpg'}, {'emotion': 'Disgust', 'intensity': '2', 'reason': 'What does that mean?', 'url': 'anonymous-source/all_shooting_images_newest/90384.jpg'}, {'emotion': 'Fear', 'intensity': '4', 'reason': 'I feel shocked. That is extremely scary', 'url': 'anonymous-source/all_shoot…
1074	March For Our Lives founder leaves the gun control movement and expresses one big regret	anonymous-source/all_shooting_images_newest/90297.jpg	[{'emotion': 'Excitement', 'intensity': '3', 'reason': 'Excitement', 'url': 'anonymous-source/all_shooting_images_newest/90297.jpg'}, {'emotion': 'Sadness', 'intensity': '2', 'reason': 'What does that mean?', 'url': 'anonymous-source/all_shooting_images_newest/90297.jpg'}, {'emotion': 'Sadness', 'intensity': '4', 'reason': 'I am extremely curious and would be interested to know he left ', 'url': …
1078	Mental Health Provider That Evaluated Nikolas Cruz Before Parkland Shooting To Service Florida Charter Schools	anonymous-source/all_shooting_images_newest/90131.jpg	[{'emotion': 'Sadness', 'intensity': '3', 'reason': 'he looks like a kid arrested in connection to gun violence', 'url': 'anonymous-source/all_shooting_images_newest/90131.jpg'}, {'emotion': 'Disgust', 'intensity': '3', 'reason': 'This provider has already failed once and they are still getting the opportunity to service more schools.', 'url': 'anonymous-source/all_shooting_images_newest/90131.jp…
1079	Cruz confronted by mother of Santa Fe shooting victim at rally	anonymous-source/all_shooting_images_newest/90164.jpg	[{'emotion': 'Sadness', 'intensity': '3', 'reason': 'several such meetings happen which are not helping curb gun violence', 'url': 'anonymous-source/all_shooting_images_newest/90164.jpg'}, {'emotion': 'Contentment', 'intensity': '3', 'reason': 'It shows that people are coming publicly to the people in governing positions regarding these atrocities.', 'url': 'anonymous-source/all_shooting_images_n…
1082	So Much Pain : A Police Family, Forever Changed by the Las Vegas Mass Shooting	anonymous-source/all_shooting_images_newest/100181.jpg	[{'emotion': 'Sadness', 'intensity': '3', 'reason': 'it is the cops who can stop gun violence in action', 'url': 'anonymous-source/all_shooting_images_newest/100181.jpg'}, {'emotion': 'Sadness', 'intensity': '3', 'reason': 'These shooting events tear open families and communities and create wounds that may never heal.', 'url': 'anonymous-source/all_shooting_images_newest/100181.jpg'}, {'emotion':…
1084	Teenagers stage 'lie-in' outside White House in support of Parkland shooting victims	anonymous-source/all_shooting_images_newest/10740.jpg	[{'emotion': 'Contentment', 'intensity': '3', 'reason': 'people staging protest taking some action for gun control', 'url': 'anonymous-source/all_shooting_images_newest/10740.jpg'}, {'emotion': 'Awe', 'intensity': '3', 'reason': 'It is a very interesting way to bring awareness and activism to this topic relating school shootings.', 'url': 'anonymous-source/all_shooting_images_newest/10740.jpg'}, …
1086	New NRA President Oliver North Suggests All Iranians Are Liars	anonymous-source/all_shooting_images_newest/10647.jpg	[{'emotion': 'Contentment', 'intensity': '3', 'reason': 'a debate will always cause more awareness among people about issue at hand', 'url': 'anonymous-source/all_shooting_images_newest/10647.jpg'}, {'emotion': 'Anger', 'intensity': '4', 'reason': 'A blatantly racist and prejudiced individual such as this should not be able to reach positions of influence.', 'url': 'anonymous-source/all_shooting_…
1094	School kids use #IfIDieInASchoolShooting to share thoughts on gun violence	anonymous-source/all_shooting_images_newest/10757.jpg	[{'emotion': 'Sadness', 'intensity': '3', 'reason': "kid shouldn't have to think about losing their lives at school", 'url': 'anonymous-source/all_shooting_images_newest/10757.jpg'}, {'emotion': 'Sadness', 'intensity': '3', 'reason': 'This should never be a concern of young children. It shows there is something really wrong.', 'url': 'anonymous-source/all_shooting_images_newest/10757.jpg'}, {'emo…
1095	Hundreds gather to honor Noel Sparks, killed in Thousand Oaks mass shooting	anonymous-source/all_shooting_images_newest/110263.jpg	[{'emotion': 'Sadness', 'intensity': '3', 'reason': 'kid laying flowers for near and dear passing away in a gun violence', 'url': 'anonymous-source/all_shooting_images_newest/110263.jpg'}, {'emotion': 'Awe', 'intensity': '3', 'reason': "I don't know much about Noel Sparks but I'm interested in this person now after seeing this much done in his honor.", 'url': 'anonymous-source/all_shooting_images…
1096	NRA's Dana Loesch: Trump 'entertaining both sides' in gun debate	anonymous-source/all_shooting_images_newest/10652.jpg	[{'emotion': 'Anger', 'intensity': '3', 'reason': 'there is nothing to be happy about gun violence', 'url': 'anonymous-source/all_shooting_images_newest/10652.jpg'}, {'emotion': 'Amusement', 'intensity': '3', 'reason': "It feels like Trump has a lot of flippy arguments so this isn't strange.", 'url': 'anonymous-source/all_shooting_images_newest/10652.jpg'}, {'emotion': 'Disgust', 'intensity': '3'…
1103	These young survivors of the Parkland shooting give voice to a nation's outrage	anonymous-source/all_shooting_images_newest/10037.jpg	[{'emotion': 'Sadness', 'intensity': '3', 'reason': 'N/A', 'url': 'anonymous-source/all_shooting_images_newest/10037.jpg'}, {'emotion': 'Sadness', 'intensity': '3', 'reason': 'sad', 'url': 'anonymous-source/all_shooting_images_newest/10037.jpg'}, {'emotion': 'Fear', 'intensity': '3', 'reason': 'how young the targets of the shooting are', 'url': 'anonymous-source/all_shooting_images_newest/10037.j…
1104	Families, friends gather as more loved ones are laid to rest in wake of school shooting	anonymous-source/all_shooting_images_newest/10825.jpg	[{'emotion': 'Sadness', 'intensity': '3', 'reason': 'N/A', 'url': 'anonymous-source/all_shooting_images_newest/10825.jpg'}, {'emotion': 'Sadness', 'intensity': '3', 'reason': 'sad', 'url': 'anonymous-source/all_shooting_images_newest/10825.jpg'}, {'emotion': 'Sadness', 'intensity': '5', 'reason': 'the image. ', 'url': 'anonymous-source/all_shooting_images_newest/10825.jpg'}, {'emotion': 'Sadness'…
1109	Gun Control Bills, Including Program to Arm Teachers, Race Through Florida Legislature	anonymous-source/all_shooting_images_newest/10075.jpg	[{'emotion': 'Sadness', 'intensity': '3', 'reason': 'N/A', 'url': 'anonymous-source/all_shooting_images_newest/10075.jpg'}, {'emotion': 'Fear', 'intensity': '3', 'reason': 'worried', 'url': 'anonymous-source/all_shooting_images_newest/10075.jpg'}, {'emotion': 'Disgust', 'intensity': '4', 'reason': 'the way they look at the legislation. ', 'url': 'anonymous-source/all_shooting_images_newest/10075.…
1110	The biggest outrage about America's gun violence is Congress' failure to do anything about it	anonymous-source/all_shooting_images_newest/10876.jpg	[{'emotion': 'Sadness', 'intensity': '3', 'reason': 'N/A', 'url': 'anonymous-source/all_shooting_images_newest/10876.jpg'}, {'emotion': 'Sadness', 'intensity': '3', 'reason': 'fear', 'url': 'anonymous-source/all_shooting_images_newest/10876.jpg'}, {'emotion': 'Sadness', 'intensity': '4', 'reason': "of the congress' behavior towards gun violence ", 'url': 'anonymous-source/all_shooting_images_newe…
1114	Kansas man sentenced to life in prison for 2017 shooting that targeted Indian men	anonymous-source/all_shooting_images_newest/22.jpg	[{'emotion': 'Sadness', 'intensity': '3', 'reason': 'N/A', 'url': 'anonymous-source/all_shooting_images_newest/22.jpg'}, {'emotion': 'Sadness', 'intensity': '3', 'reason': 'sad', 'url': 'anonymous-source/all_shooting_images_newest/22.jpg'}, {'emotion': 'Contentment', 'intensity': '5', 'reason': 'the man gets what he deserved ', 'url': 'anonymous-source/all_shooting_images_newest/22.jpg'}, {'emoti…
1115	Probe: Mercy Hospital gunman was 'disliked classmate'at fire academy, described as presenting himself in'perverted' way	anonymous-source/all_shooting_images_newest/110226.jpg	[{'emotion': 'Sadness', 'intensity': '3', 'reason': 'N/A', 'url': 'anonymous-source/all_shooting_images_newest/110226.jpg'}, {'emotion': 'Sadness', 'intensity': '3', 'reason': 'fear', 'url': 'anonymous-source/all_shooting_images_newest/110226.jpg'}, {'emotion': 'Disgust', 'intensity': '4', 'reason': 'of the words used in the tittle that made me feel that way ', 'url': 'anonymous-source/all_shooti…
1126	This Is Us Paid Emotional Tribute to the Pittsburgh Synagogue Shooting Victims	anonymous-source/all_shooting_images_newest/100100.jpg	[{'emotion': 'Fear', 'intensity': '3', 'reason': 'this is a weird image', 'url': 'anonymous-source/all_shooting_images_newest/100100.jpg'}, {'emotion': 'Sadness', 'intensity': '4', 'reason': 'I am now aware that this is a screencap from a TV show, and once again it makes me saddened about the violence that occurs towards synagogues.', 'url': 'anonymous-source/all_shooting_images_newest/100100.jpg…
1128	Black man's death: Questions remain in Alabama mall shooting	anonymous-source/all_shooting_images_newest/110233.jpg	[{'emotion': 'Sadness', 'intensity': '5', 'reason': 'this is a great image of the victim and will draw readers in.', 'url': 'anonymous-source/all_shooting_images_newest/110233.jpg'}, {'emotion': 'Sadness', 'intensity': '5', 'reason': 'The case appears to not be fully closed since "questions remain", which makes me sad that the victim in the image was attacked and killed in such a way.', 'url': 'a…
1131	Chicago, suburban libraries brace for the question: Can I print out a 3D gun?	anonymous-source/all_shooting_images_newest/96.jpg	[{'emotion': 'Contentment', 'intensity': '4', 'reason': 'they are trying to go around the law?', 'url': 'anonymous-source/all_shooting_images_newest/96.jpg'}, {'emotion': 'Fear', 'intensity': '4', 'reason': 'this makes me wonder if this is actually a genuine question the library has received, because I cannot fathom the idea of someone going to a library to do that.', 'url': 'anonymous-source/all…
1132	Hearing scheduled as gun-rights advocacy groups look to overturn Deerfield assault weapons ban	anonymous-source/all_shooting_images_newest/100248.jpg	[{'emotion': 'Sadness', 'intensity': '4', 'reason': 'I do not know the context.', 'url': 'anonymous-source/all_shooting_images_newest/100248.jpg'}, {'emotion': 'Anger', 'intensity': '3', 'reason': "I don't understand why this group would want less gun restrictions, especially with all the violence occurring in recent years.", 'url': 'anonymous-source/all_shooting_images_newest/100248.jpg'}, {'emo…
1135	Publix Suspends Contributions To NRA-Backed Politician Amid Protests	anonymous-source/all_shooting_images_newest/10101.jpg	[{'emotion': 'Contentment', 'intensity': '4', 'reason': 'I like Publix.', 'url': 'anonymous-source/all_shooting_images_newest/10101.jpg'}, {'emotion': 'Contentment', 'intensity': '3', 'reason': 'knowing the context, I originally thought it was about a shooting that occurred in a Publix.', 'url': 'anonymous-source/all_shooting_images_newest/10101.jpg'}, {'emotion': 'Awe', 'intensity': '4', 'reason…
1137	Breaking Down the 27 Words of the Second Amendment	anonymous-source/all_shooting_images_newest/10282.jpg	[{'emotion': 'Contentment', 'intensity': '3', 'reason': 'I am not sure how to feel towards this. ', 'url': 'anonymous-source/all_shooting_images_newest/10282.jpg'}, {'emotion': 'Fear', 'intensity': '3', 'reason': 'the gun towards me makes me feel stressful', 'url': 'anonymous-source/all_shooting_images_newest/10282.jpg'}, {'emotion': 'Contentment', 'intensity': '4', 'reason': 'It is time to look …
1143	Pittsburgh synagogue shooting: how conspiracy theory politics emboldens anti-Semitism	anonymous-source/all_shooting_images_newest/100014.jpg	[{'emotion': 'Sadness', 'intensity': '4', 'reason': 'this is upsetting to hear ', 'url': 'anonymous-source/all_shooting_images_newest/100014.jpg'}, {'emotion': 'Sadness', 'intensity': '3', 'reason': 'the white flower shows that people mourn for those victims.', 'url': 'anonymous-source/all_shooting_images_newest/100014.jpg'}, {'emotion': 'Fear', 'intensity': '5', 'reason': "I'm Jewish and this sh…
1148	House to vote next week on school safety bill with no gun measures	anonymous-source/all_shooting_images_newest/10175.jpg	[{'emotion': 'Contentment', 'intensity': '3', 'reason': 'I am not sure what this means, as I do not know how to feel. ', 'url': 'anonymous-source/all_shooting_images_newest/10175.jpg'}, {'emotion': 'Contentment', 'intensity': '3', 'reason': 'the picture makes the news become more reliable', 'url': 'anonymous-source/all_shooting_images_newest/10175.jpg'}, {'emotion': 'Anger', 'intensity': '5', 're…
1151	Remington to file for bankruptcy amid declining gun sales	anonymous-source/all_shooting_images_newest/10764.jpg	[{'emotion': 'Fear', 'intensity': '4', 'reason': 'if gun sales go down it makes me scared as more people will want to go and purchase guns since the price of them are lower than normal. ', 'url': 'anonymous-source/all_shooting_images_newest/10764.jpg'}, {'emotion': 'Contentment', 'intensity': '3', 'reason': 'with decreasing people could have gun, the gun shop also should decrease', 'url': 'anonym…
1158	Delaware lawmakers pass Beau Biden Gun Violence Protection Act	anonymous-source/all_shooting_images_newest/10018.jpg	[{'emotion': 'Contentment', 'intensity': '4', 'reason': 'Things are turning better. We can see the efforts of the people.', 'url': 'anonymous-source/all_shooting_images_newest/10018.jpg'}, {'emotion': 'Contentment', 'intensity': '2', 'reason': 'Delaware passed a gun violence protection act.', 'url': 'anonymous-source/all_shooting_images_newest/10018.jpg'}, {'emotion': 'Excitement', 'intensity': '…
1159	New York passes bill to restrict guns for domestic abusers	anonymous-source/all_shooting_images_newest/10813.jpg	[{'emotion': 'Excitement', 'intensity': '4', 'reason': 'We can see hope.', 'url': 'anonymous-source/all_shooting_images_newest/10813.jpg'}, {'emotion': 'Contentment', 'intensity': '4', 'reason': 'a law restricting gun ownership for domestic abusers is an obvious step in the right direction.', 'url': 'anonymous-source/all_shooting_images_newest/10813.jpg'}, {'emotion': 'Contentment', 'intensity': …
1161	Judge blocks posting of online plans for 3D printed guns	anonymous-source/all_shooting_images_newest/271.jpg	[{'emotion': 'Excitement', 'intensity': '4', 'reason': "It's another efficient work.", 'url': 'anonymous-source/all_shooting_images_newest/271.jpg'}, {'emotion': 'Amusement', 'intensity': '4', 'reason': "3D-printed guns are a likelihood with the capability of today's technology.", 'url': 'anonymous-source/all_shooting_images_newest/271.jpg'}, {'emotion': 'Contentment', 'intensity': '3', 'reason':…
1162	Parkland parents pushing politicians to address gun violence	anonymous-source/all_shooting_images_newest/239.jpg	[{'emotion': 'Contentment', 'intensity': '4', 'reason': 'They chose to stand up and fight against gun violence.', 'url': 'anonymous-source/all_shooting_images_newest/239.jpg'}, {'emotion': 'Sadness', 'intensity': '2', 'reason': "I'm unsure about whether these Parkland protests had much influence on politicians.", 'url': 'anonymous-source/all_shooting_images_newest/239.jpg'}, {'emotion': 'Sadness'…
1164	Trump calls for death penalty after synagogue shooting; leaders react to tragedy with sorrow, anger and frustration	anonymous-source/all_shooting_images_newest/100205.jpg	[{'emotion': 'Contentment', 'intensity': '4', 'reason': 'Trump did the right thing.', 'url': 'anonymous-source/all_shooting_images_newest/100205.jpg'}, {'emotion': 'Disgust', 'intensity': '3', 'reason': "the death penalty is an incredibly grave punishment, and it's concerning that the former president called for it.", 'url': 'anonymous-source/all_shooting_images_newest/100205.jpg'}, {'emotion': '…
1168	Romney open to new gun measures	anonymous-source/all_shooting_images_newest/10019.jpg	[{'emotion': 'Awe', 'intensity': '4', 'reason': 'We need a staunch leader.', 'url': 'anonymous-source/all_shooting_images_newest/10019.jpg'}, {'emotion': 'Awe', 'intensity': '2', 'reason': 'Romney, a Republican, is open to the idea of stricter gun control laws.', 'url': 'anonymous-source/all_shooting_images_newest/10019.jpg'}, {'emotion': 'Contentment', 'intensity': '1', 'reason': '"open to" is t…
1174	At Butler High School in N.C., Bullying Led to Fatal Shooting of Student, Police Say	anonymous-source/all_shooting_images_newest/100220.jpg	[{'emotion': 'Fear', 'intensity': '4', 'reason': 'School should be a safe place for us.', 'url': 'anonymous-source/all_shooting_images_newest/100220.jpg'}, {'emotion': 'Sadness', 'intensity': '3', 'reason': 'of how bullying can lead to such a great degree of violence.', 'url': 'anonymous-source/all_shooting_images_newest/100220.jpg'}, {'emotion': 'Anger', 'intensity': '4', 'reason': 'the school c…
1176	Federal Grand Jury Charges Pittsburgh Synagogue Shooter With Federal Hate Crimes	anonymous-source/all_shooting_images_newest/100335.jpg	[{'emotion': 'Contentment', 'intensity': '4', 'reason': 'The criminal should never be forgiven.', 'url': 'anonymous-source/all_shooting_images_newest/100335.jpg'}, {'emotion': 'Sadness', 'intensity': '1', 'reason': 'there is a mention of a synagogue shooting in the headline, which is sad to ponder.', 'url': 'anonymous-source/all_shooting_images_newest/100335.jpg'}, {'emotion': 'Contentment', 'int…
1181	Gun-Control Activist Lucy McBath Has Officially Won Her Congressional Race	anonymous-source/all_shooting_images_newest/110384.jpg	[{'emotion': 'Excitement', 'intensity': '3', 'reason': 'there is hope for the future', 'url': 'anonymous-source/all_shooting_images_newest/110384.jpg'}, {'emotion': 'Awe', 'intensity': '4', 'reason': 'to see a woman of color in this position ', 'url': 'anonymous-source/all_shooting_images_newest/110384.jpg'}, {'emotion': 'Contentment', 'intensity': '5', 'reason': 'i think how she looks makes me f…
1184	Tragedy of grand scale': Victims remembered 1 year after Vegas shooting	anonymous-source/all_shooting_images_newest/100256.jpg	[{'emotion': 'Sadness', 'intensity': '3', 'reason': 'all these people died', 'url': 'anonymous-source/all_shooting_images_newest/100256.jpg'}, {'emotion': 'Sadness', 'intensity': '4', 'reason': 'lots of grief in this photo with the number of deaths ', 'url': 'anonymous-source/all_shooting_images_newest/100256.jpg'}, {'emotion': 'Sadness', 'intensity': '5', 'reason': 'i feel really sorry to them b…
1185	For Parkland students, reminders of deadly shooting are 'everywhere you go'	anonymous-source/all_shooting_images_newest/10548.jpg	[{'emotion': 'Sadness', 'intensity': '3', 'reason': 'these kids are probably fearful while at school', 'url': 'anonymous-source/all_shooting_images_newest/10548.jpg'}, {'emotion': 'Sadness', 'intensity': '4', 'reason': 'the kids live in a police state for their own safety ', 'url': 'anonymous-source/all_shooting_images_newest/10548.jpg'}, {'emotion': 'Contentment', 'intensity': '5', 'reason': 'I …
1203	Garden provides place to mourn Las Vegas shooting victims	anonymous-source/all_shooting_images_newest/90343.jpg	[{'emotion': 'Contentment', 'intensity': '3', 'reason': 'Because of the information provided by the title', 'url': 'anonymous-source/all_shooting_images_newest/90343.jpg'}, {'emotion': 'Sadness', 'intensity': '3', 'reason': 'really really sad', 'url': 'anonymous-source/all_shooting_images_newest/90343.jpg'}, {'emotion': 'Awe', 'intensity': '3', 'reason': "This is really a sweet thing to do, it's …
1204	Florida House passes gun reform, school safety bill after lengthy debate	anonymous-source/all_shooting_images_newest/10339.jpg	[{'emotion': 'Contentment', 'intensity': '3', 'reason': "Looks like kids' safety are taken care of .", 'url': 'anonymous-source/all_shooting_images_newest/10339.jpg'}, {'emotion': 'Anger', 'intensity': '3', 'reason': 'feel bad that people have to pay for safety', 'url': 'anonymous-source/all_shooting_images_newest/10339.jpg'}, {'emotion': 'Contentment', 'intensity': '3', 'reason': "I'm really hap…
1205	Killer Mike Takes Strong Stance in Defense of Gun Ownership in NRA Interview	anonymous-source/all_shooting_images_newest/10388.jpg	[{'emotion': 'Awe', 'intensity': '3', 'reason': "Don't think the picture and the title are related.", 'url': 'anonymous-source/all_shooting_images_newest/10388.jpg'}, {'emotion': 'Anger', 'intensity': '3', 'reason': 'so selfish', 'url': 'anonymous-source/all_shooting_images_newest/10388.jpg'}, {'emotion': 'Anger', 'intensity': '4', 'reason': "the ill timing of this feels like a pr stunt. It's so …
1211	NRA to spend $1 million on pro-Kavanaugh ads: SCOTUS pick will protect right to keep and bear arms	anonymous-source/all_shooting_images_newest/474.jpg	[{'emotion': 'Awe', 'intensity': '1', 'reason': 'The title and the picture seem neutral', 'url': 'anonymous-source/all_shooting_images_newest/474.jpg'}, {'emotion': 'Fear', 'intensity': '3', 'reason': 'guns are able to be bought', 'url': 'anonymous-source/all_shooting_images_newest/474.jpg'}, {'emotion': 'Anger', 'intensity': '4', 'reason': "it's disgusting how the NRA is going to praise the just…
1213	Faces Not Forgotten' honors young victims of gun violence in America	anonymous-source/all_shooting_images_newest/90387.jpg	[{'emotion': 'Awe', 'intensity': '1', 'reason': 'N/A', 'url': 'anonymous-source/all_shooting_images_newest/90387.jpg'}, {'emotion': 'Sadness', 'intensity': '3', 'reason': 'they could be alive', 'url': 'anonymous-source/all_shooting_images_newest/90387.jpg'}, {'emotion': 'Sadness', 'intensity': '4', 'reason': "The lives lost to gun violence are growing exponentially, and while the country realizes…
1214	Today's talker: Could 'mistreatment' of shooter justify Santa Fe killings?	anonymous-source/all_shooting_images_newest/10629.jpg	[{'emotion': 'Awe', 'intensity': '1', 'reason': 'N/A', 'url': 'anonymous-source/all_shooting_images_newest/10629.jpg'}, {'emotion': 'Disgust', 'intensity': '3', 'reason': 'just ban the guns', 'url': 'anonymous-source/all_shooting_images_newest/10629.jpg'}, {'emotion': 'Anger', 'intensity': '5', 'reason': "Gun violence is not excused in any way shape or form. However, the argument to defend a shoo…
1215	Paul McCartney attends 'March For Our Lives': I lost my best friend to gun violence	anonymous-source/all_shooting_images_newest/10397.jpg	[{'emotion': 'Awe', 'intensity': '1', 'reason': 'N/A', 'url': 'anonymous-source/all_shooting_images_newest/10397.jpg'}, {'emotion': 'Sadness', 'intensity': '3', 'reason': "can't imagine if this happens to me", 'url': 'anonymous-source/all_shooting_images_newest/10397.jpg'}, {'emotion': 'Sadness', 'intensity': '2', 'reason': "I respect people with a platform when they speak up about what's going o…
1218	Commentary: This is how common school shootings are in America	anonymous-source/all_shooting_images_newest/110476.jpg	[{'emotion': 'Sadness', 'intensity': '4', 'reason': 'I cannot understand why the government cannot protect the students, who are the future of the country', 'url': 'anonymous-source/all_shooting_images_newest/110476.jpg'}, {'emotion': 'Fear', 'intensity': '5', 'reason': 'School shootings are too common. ', 'url': 'anonymous-source/all_shooting_images_newest/110476.jpg'}, {'emotion': 'Sadness', 'i…
1219	These Florida lawmakers accepted money from the National Rifle Association	anonymous-source/all_shooting_images_newest/10776.jpg	[{'emotion': 'Disgust', 'intensity': '3', 'reason': 'The National Rifle Association gained money from those who bought guns. The money might be tainted with blood！', 'url': 'anonymous-source/all_shooting_images_newest/10776.jpg'}, {'emotion': 'Disgust', 'intensity': '5', 'reason': 'People are accepting money from corporations that promote killings indirectly/directly', 'url': 'anonymous-source/al…
1223	Corporate partners cut cord with NRA as gun control debate rages	anonymous-source/all_shooting_images_newest/10039.jpg	[{'emotion': 'Contentment', 'intensity': '4', 'reason': ' Businesses that speak out for the victims of shootings are ethical.', 'url': 'anonymous-source/all_shooting_images_newest/10039.jpg'}, {'emotion': 'Contentment', 'intensity': '4', 'reason': 'This is what should be happening. Corporations have power and should be setting the example. ', 'url': 'anonymous-source/all_shooting_images_newest/10…
1226	Jaime Lee Curtis on Fox News criticism of her using weapons in a movie, despite advocating for gun control: 'It was just silly'	anonymous-source/all_shooting_images_newest/100200.jpg	[{'emotion': 'Amusement', 'intensity': '3', 'reason': 'Banning use of weapons in movies is unnecessary. What should really be of concern are the laws regarding guns in the real word.', 'url': 'anonymous-source/all_shooting_images_newest/100200.jpg'}, {'emotion': 'Awe', 'intensity': '3', 'reason': "I don't think that movies have a strong impact on violence. I would need to do more research though …
1228	Who is Jemel Roberson? Black Security Guard Shot Dead By Police After Subduing and Disarming Gunman	anonymous-source/all_shooting_images_newest/110516.jpg	[{'emotion': 'Anger', 'intensity': '4', 'reason': 'This policeman was so bad because he was involved in both gun shooting and discrimination.', 'url': 'anonymous-source/all_shooting_images_newest/110516.jpg'}, {'emotion': 'Anger', 'intensity': '4', 'reason': "This will sadly keep happening that's what makes me happy more than an innocent life being taken. This will happen to more innocent people,…
1229	Trump meets with families affected by Texas shooting, mother calls him 'toddler'	anonymous-source/all_shooting_images_newest/10777.jpg	[{'emotion': 'Disgust', 'intensity': '3', 'reason': "i don't really understand why she called an old man a child. That is irresponsible. ", 'url': 'anonymous-source/all_shooting_images_newest/10777.jpg'}, {'emotion': 'Disgust', 'intensity': '4', 'reason': "He does not care. He's only doing it because he was told to. I could not imagine how I could be comforted by him. ", 'url': 'anonymous-source/…
1231	Amazon bans the sale of a guidebook for 3D printing a gun	anonymous-source/all_shooting_images_newest/182.jpg	[{'emotion': 'Contentment', 'intensity': '3', 'reason': "I can feel Amazon's consideration for security risks.", 'url': 'anonymous-source/all_shooting_images_newest/182.jpg'}, {'emotion': 'Contentment', 'intensity': '4', 'reason': "Amazon has a huge impact and I'm glad they're taking action to stop the spread of guns. ", 'url': 'anonymous-source/all_shooting_images_newest/182.jpg'}, {'emotion': '…
1232	November 7 1:04 PM Washington voters approve tough gun control measures	anonymous-source/all_shooting_images_newest/110276.jpg	[{'emotion': 'Contentment', 'intensity': '4', 'reason': 'This approach is responsible and protective of the public.', 'url': 'anonymous-source/all_shooting_images_newest/110276.jpg'}, {'emotion': 'Contentment', 'intensity': '4', 'reason': "I'm glad that people are taking action and that we can see it happening. ", 'url': 'anonymous-source/all_shooting_images_newest/110276.jpg'}, {'emotion': 'Cont…
1233	After Santa Fe School Shooting, Texas Town Grapples With Bullying	anonymous-source/all_shooting_images_newest/10053.jpg	[{'emotion': 'Contentment', 'intensity': '3', 'reason': 'Schools should really teach students how to protect themselves.', 'url': 'anonymous-source/all_shooting_images_newest/10053.jpg'}, {'emotion': 'Awe', 'intensity': '3', 'reason': 'What kind of bullying? I need more context', 'url': 'anonymous-source/all_shooting_images_newest/10053.jpg'}, {'emotion': 'Sadness', 'intensity': '4', 'reason': "I…
1239	Trump Adds Cautious Support to Changes to Background Checks for Gun Buyers	anonymous-source/all_shooting_images_newest/10784.jpg	[{'emotion': 'Sadness', 'intensity': '2', 'reason': 'I feel that someone has been hurt and the former president is visiting the victim in the hospital', 'url': 'anonymous-source/all_shooting_images_newest/10784.jpg'}, {'emotion': 'Disgust', 'intensity': '5', 'reason': 'while supporting changes to background checks is good, the fact that its cautious is gross to me. I also hate trump', 'url': 'ano…
1240	After Pittsburgh synagogue shooting, Trump decries 'wicked act of mass murder'	anonymous-source/all_shooting_images_newest/100177.jpg	[{'emotion': 'Fear', 'intensity': '2', 'reason': 'If the situation arose to the level of president to address it. That would mean that it is really serious and that I must be careful about my life. ', 'url': 'anonymous-source/all_shooting_images_newest/100177.jpg'}, {'emotion': 'Sadness', 'intensity': '5', 'reason': 'its sad that there was a shooting', 'url': 'anonymous-source/all_shooting_images…
1241	Undetectable' plastic 3-D printed guns have been detected by TSA airport screeners	anonymous-source/all_shooting_images_newest/222.jpg	[{'emotion': 'Anger', 'intensity': '4', 'reason': 'These are the incidents that lead to more gun violence incidents which would lead to loss of life for a large number of people.', 'url': 'anonymous-source/all_shooting_images_newest/222.jpg'}, {'emotion': 'Anger', 'intensity': '5', 'reason': '3D printed guns are such a dangerous thing and it makes me angry that this tech is possible', 'url': 'ano…
1243	The Latest: Shooting survivors focus anger at Trump, tweets	anonymous-source/all_shooting_images_newest/10116.jpg	[{'emotion': 'Sadness', 'intensity': '4', 'reason': 'I feel sad that someone has been killed because of gun violence and the teddy bear gives me the impression that people are paying their respects to the victim. ', 'url': 'anonymous-source/all_shooting_images_newest/10116.jpg'}, {'emotion': 'Anger', 'intensity': '5', 'reason': 'I also focus anger at trump and its sad that so many people are expo…
1245	Wells Fargo gives gun maker a new line of credit, unswayed by nuns' opposition	anonymous-source/all_shooting_images_newest/100043.jpg	[{'emotion': 'Anger', 'intensity': '4', 'reason': 'The policies of such corporations usually propel the manufacture of guns which indirectly increases its usage. This would ultimately lead to more gun violence. ', 'url': 'anonymous-source/all_shooting_images_newest/100043.jpg'}, {'emotion': 'Anger', 'intensity': '5', 'reason': 'wells fargo is supporting gun makers', 'url': 'anonymous-source/all_s…
1247	Pittsburgh synagogue shooting suspect Robert Bowers pleads not guilty to federal hate crime charges	anonymous-source/all_shooting_images_newest/110396.jpg	[{'emotion': 'Anger', 'intensity': '2', 'reason': 'Either the person is guilty and pleading not guilty which would mean he is trying to escape or the person is not guilty and the real killer is out in the open. Both situations are scary and make me angry with the authorities. ', 'url': 'anonymous-source/all_shooting_images_newest/110396.jpg'}, {'emotion': 'Disgust', 'intensity': '5', 'reason': "t…
1251	Shopify bans sales of some guns, weapons and ammunition	anonymous-source/all_shooting_images_newest/240.jpg	[{'emotion': 'Contentment', 'intensity': '3', 'reason': 'Corporations are finally speaking up on the issue of gun violence and are taking proactive measures.', 'url': 'anonymous-source/all_shooting_images_newest/240.jpg'}, {'emotion': 'Contentment', 'intensity': '2', 'reason': "I'm glad shopify banned the sale of guns", 'url': 'anonymous-source/all_shooting_images_newest/240.jpg'}, {'emotion': 'A…
1254	Border Patrol agent accused of killing 4 stockpiled weapons and sought 'suicide by cop' : Police	anonymous-source/all_shooting_images_newest/90258.jpg	[{'emotion': 'Anger', 'intensity': '4', 'reason': 'Border patrol agents are supposed to protect the borders but did not have to resort to such extreme measures. ', 'url': 'anonymous-source/all_shooting_images_newest/90258.jpg'}, {'emotion': 'Anger', 'intensity': '5', 'reason': 'this is just gross', 'url': 'anonymous-source/all_shooting_images_newest/90258.jpg'}, {'emotion': 'Fear', 'intensity': '…
1255	FedEx to end program that offers discounts for business members of NRA	anonymous-source/all_shooting_images_newest/100280.jpg	[{'emotion': 'Contentment', 'intensity': '2', 'reason': 'finally corporations are speaking up on the issue of gun violence and are pointing to it. But the measures taken by them is not enough and more measures are to be taken. ', 'url': 'anonymous-source/all_shooting_images_newest/100280.jpg'}, {'emotion': 'Contentment', 'intensity': '3', 'reason': "I'm happy that fedex is ending this but why was…
1263	Marchers in Huntington Beach join call for action on gun violence and school safety	anonymous-source/all_shooting_images_newest/10396.jpg	[{'emotion': 'Excitement', 'intensity': '3', 'reason': 'The crowd is walking under the bright sun, it looks like they are doing great', 'url': 'anonymous-source/all_shooting_images_newest/10396.jpg'}, {'emotion': 'Contentment', 'intensity': '5', 'reason': 'I am proud of other young people in my generation that choose to make a stand for stricter gun reform. ', 'url': 'anonymous-source/all_shootin…
1264	3D-printed activist' honors student from Parkland shooting in Times Square	anonymous-source/all_shooting_images_newest/100375.jpg	[{'emotion': 'Excitement', 'intensity': '3', 'reason': 'A lot of strong colors and art', 'url': 'anonymous-source/all_shooting_images_newest/100375.jpg'}, {'emotion': 'Sadness', 'intensity': '4', 'reason': 'The statue to honor the fallen Parkland student is wonderful. I am sad because the death of all school shootings could have been prevented with stricter gun control. ', 'url': 'anonymous-sourc…
1270	Montana Gov. Steve Bullock says he 'would' support assault weapons ban	anonymous-source/all_shooting_images_newest/356.jpg	[{'emotion': 'Awe', 'intensity': '4', 'reason': 'The headline express a reasonable claim', 'url': 'anonymous-source/all_shooting_images_newest/356.jpg'}, {'emotion': 'Excitement', 'intensity': '4', 'reason': 'This news headline makes me excited because it is in support of stricter gun and assault weapon reform.', 'url': 'anonymous-source/all_shooting_images_newest/356.jpg'}, {'emotion': 'Contentm…
1274	Gunman targeting Jews kills 11 in Pittsburgh synagogue	anonymous-source/all_shooting_images_newest/100379.jpg	[{'emotion': 'Sadness', 'intensity': '5', 'reason': 'death involved and people crying in the image', 'url': 'anonymous-source/all_shooting_images_newest/100379.jpg'}, {'emotion': 'Anger', 'intensity': '5', 'reason': 'Guns are weapons of extreme violence and have the potential to hurt so many. There is no use for civilians to have automatic weapons to kill others and their disposal. It angers me t…
1278	Trump warns Dems will 'take away your Second Amendment'	anonymous-source/all_shooting_images_newest/10056.jpg	[{'emotion': 'Contentment', 'intensity': '2', 'reason': "That's his opinion and not imflammatory.", 'url': 'anonymous-source/all_shooting_images_newest/10056.jpg'}, {'emotion': 'Disgust', 'intensity': '5', 'reason': 'He and his views are evil and disgusting', 'url': 'anonymous-source/all_shooting_images_newest/10056.jpg'}, {'emotion': 'Amusement', 'intensity': '5', 'reason': 'when I see Trump, I …
1288	Trump applauds NRA leaders, Kanye West in speech	anonymous-source/all_shooting_images_newest/10058.jpg	[{'emotion': 'Amusement', 'intensity': '4', 'reason': 'I find it amusing that Kanye West is in this headline.', 'url': 'anonymous-source/all_shooting_images_newest/10058.jpg'}, {'emotion': 'Disgust', 'intensity': '5', 'reason': "The man is disgusting and so is the NRA; why include Kanye in this headline, it's pure clickbait", 'url': 'anonymous-source/all_shooting_images_newest/10058.jpg'}, {'emot…
1290	55th District candidates address guns, political affiliations during Park Ridge forum	anonymous-source/all_shooting_images_newest/100329.jpg	[{'emotion': 'Fear', 'intensity': '2', 'reason': 'This picture makes me feel tense. I wish they would sit down.', 'url': 'anonymous-source/all_shooting_images_newest/100329.jpg'}, {'emotion': 'Contentment', 'intensity': '1', 'reason': "I don't understand the context", 'url': 'anonymous-source/all_shooting_images_newest/100329.jpg'}, {'emotion': 'Contentment', 'intensity': '3', 'reason': "It's goo…
1292	Anti-gun student walkout included stomping on American flag and jumping on cop car	anonymous-source/all_shooting_images_newest/10001.jpg	[{'emotion': 'Disgust', 'intensity': '5', 'reason': 'They are a bunch of self-righteous losers.', 'url': 'anonymous-source/all_shooting_images_newest/10001.jpg'}, {'emotion': 'Fear', 'intensity': '3', 'reason': 'This protest does not feel particularly peaceful. I fear for the safety of students, especially POC', 'url': 'anonymous-source/all_shooting_images_newest/10001.jpg'}, {'emotion': 'Sadness…
1293	Trump's silence on Waffle House shooting speaks volumes	anonymous-source/all_shooting_images_newest/10706.jpg	[{'emotion': 'Sadness', 'intensity': '2', 'reason': 'He should say something about a national tragedy.', 'url': 'anonymous-source/all_shooting_images_newest/10706.jpg'}, {'emotion': 'Disgust', 'intensity': '4', 'reason': "Stop giving Trump a platform, especially when he didn't even say anything", 'url': 'anonymous-source/all_shooting_images_newest/10706.jpg'}, {'emotion': 'Sadness', 'intensity': …
1294	I don t want prayers ... I want gun control, demands mom of Thousand Oaks mass shooting victim ABC News	anonymous-source/all_shooting_images_newest/110098.jpg	[{'emotion': 'Disgust', 'intensity': '2', 'reason': 'I do not like her tone.', 'url': 'anonymous-source/all_shooting_images_newest/110098.jpg'}, {'emotion': 'Anger', 'intensity': '4', 'reason': 'This is a really bad image to use due to the Neo-Nazi tattoo on the man in the back', 'url': 'anonymous-source/all_shooting_images_newest/110098.jpg'}, {'emotion': 'Sadness', 'intensity': '4', 'reason': '…
1296	Democrats Plan to Pursue Aggressive Gun-Control Legislation	anonymous-source/all_shooting_images_newest/110031.jpg	[{'emotion': 'Fear', 'intensity': '2', 'reason': 'Aggressive is a strong word.', 'url': 'anonymous-source/all_shooting_images_newest/110031.jpg'}, {'emotion': 'Excitement', 'intensity': '3', 'reason': "It sounds promising, but they've done essentially nothing so far so I'm dubious", 'url': 'anonymous-source/all_shooting_images_newest/110031.jpg'}, {'emotion': 'Excitement', 'intensity': '4', 'reas…
