# Supplementary material
Source: ML conference proceedings conference paper supplement (https://aclanthology.org/2022.aacl-main.29)
Supplement: Dataset [file 2022.aacl-main.29.Dataset.zip › NEmoP/NEmoP.csv]

	Headline	url	text_responses	image_responses	textimage_responses
0	Man accused of shooting at black teenager who knocked on his door to ask for directions	anonymous-source/all_shooting_images_newest/10477.jpg	[{'emotion': 'Disgust', 'intensity': '4', 'reason': 'there was no reason that boy should have died'}, {'emotion': 'Fear', 'intensity': '3', 'reason': 'why someone can be so calm after shooting people? does he really have emotions?'}, {'emotion': 'Sadness', 'intensity': '4', 'reason': 'feel sad about the kid because of the terrible unreasonable tragedy '}, {'emotion': 'Sadness', 'intensity': '3', …	[{'emotion': 'Disgust', 'intensity': '4', 'reason': 'I just feel that this person is the criminal.'}, {'emotion': 'Fear', 'intensity': '2', 'reason': 'looks like the person was involved in gun violence '}, {'emotion': 'Fear', 'intensity': '4', 'reason': "the person and the style of the photo taken looks like he's a convict"}, {'emotion': 'Fear', 'intensity': '4', 'reason': "I live in America now,…	[{'emotion': 'Sadness', 'intensity': '3', 'reason': 'Im disappointed for racial discriminations', 'url': 'anonymous-source/all_shooting_images_newest/10477.jpg'}, {'emotion': 'Fear', 'intensity': '4', 'reason': 'I am being stared at and do not know who this is. ', 'url': 'anonymous-source/all_shooting_images_newest/10477.jpg'}, {'emotion': 'Anger', 'intensity': '3', 'reason': 'you should not shoo…
1	Emma Gonzalez Brought to Tears Honoring Victims of Gun Violence	anonymous-source/all_shooting_images_newest/100502.jpg	[{'emotion': 'Sadness', 'intensity': '3', 'reason': 'gun violence is such a serious issue '}, {'emotion': 'Sadness', 'intensity': '3', 'reason': 'it is sad to know the lost of someone'}, {'emotion': 'Sadness', 'intensity': '4', 'reason': 'sad story '}, {'emotion': 'Sadness', 'intensity': '3', 'reason': "the trauma that victims' families have to undergo is unimaginable. "}, {'emotion': 'Contentmen…	[{'emotion': 'Contentment', 'intensity': '2', 'reason': 'The person may talks about something about anti gun activity.'}, {'emotion': 'Amusement', 'intensity': '3', 'reason': "not sure what to make out of this picture. I'm not clear in the involvement of this person in terms of gun violence "}, {'emotion': 'Awe', 'intensity': '5', 'reason': 'I really respect her work as an activist'}, {'emotion':…	[{'emotion': 'Awe', 'intensity': '1', 'reason': "I don't care", 'url': 'anonymous-source/all_shooting_images_newest/100502.jpg'}, {'emotion': 'Contentment', 'intensity': '2', 'reason': 'I like seeing happy facial expressions', 'url': 'anonymous-source/all_shooting_images_newest/100502.jpg'}, {'emotion': 'Sadness', 'intensity': '3', 'reason': 'victims should be remembered', 'url': 'anonymous-sourc…
2	Donald Trump Upstaged At School Shooting Listening Event By Father Of Victim	anonymous-source/all_shooting_images_newest/10332.jpg	[{'emotion': 'Anger', 'intensity': '3', 'reason': 'I would need to know more '}, {'emotion': 'Awe', 'intensity': '3', 'reason': 'it is good to devote time to listening to their stories. I think it is a relief to them.'}, {'emotion': 'Disgust', 'intensity': '2', 'reason': 'such a childish action '}, {'emotion': 'Disgust', 'intensity': '3', 'reason': 'of what Donald Trump does shows his lack of emp…	[{'emotion': 'Anger', 'intensity': '3', 'reason': 'The president really should regulation the guns.'}, {'emotion': 'Disgust', 'intensity': '4', 'reason': 'Since we know Donald Trump had controversial opinions on Gun control, I would feel disgusted seeing him part of such news '}, {'emotion': 'Amusement', 'intensity': '4', 'reason': "most of the new content i read about donald trump is amusing to …	[{'emotion': 'Amusement', 'intensity': '2', 'reason': 'I feel like he can do some good things finally', 'url': 'anonymous-source/all_shooting_images_newest/10332.jpg'}, {'emotion': 'Disgust', 'intensity': '5', 'reason': 'I do not support Trump ', 'url': 'anonymous-source/all_shooting_images_newest/10332.jpg'}, {'emotion': 'Amusement', 'intensity': '3', 'reason': 'Trump loves to upstage', 'url': '…
3	Trump Officials To Learn About Safety At School Where Staff Has Access To Guns	anonymous-source/all_shooting_images_newest/401.jpg	[{'emotion': 'Contentment', 'intensity': '3', 'reason': 'they are talking about safety however staff has guns'}, {'emotion': 'Excitement', 'intensity': '3', 'reason': 'the start may be a better regulation toward gun control at school'}, {'emotion': 'Contentment', 'intensity': '4', 'reason': 'the government is taking good action '}, {'emotion': 'Anger', 'intensity': '3', 'reason': 'Things like thi…	[{'emotion': 'Disgust', 'intensity': '3', 'reason': "I don't believe anything come out from politicians' mouth about gun control."}, {'emotion': 'Amusement', 'intensity': '3', 'reason': 'not sure about the identity of this person'}, {'emotion': 'Anger', 'intensity': '1', 'reason': "I don't know much work done by Jeff Sessions but I knew he was the attorney general under Trump. I'm feeling neutral…	[{'emotion': 'Fear', 'intensity': '3', 'reason': 'its not safe for students', 'url': 'anonymous-source/all_shooting_images_newest/401.jpg'}, {'emotion': 'Contentment', 'intensity': '2', 'reason': "I don't feel any certain way about the photo it just feels natural to look at ", 'url': 'anonymous-source/all_shooting_images_newest/401.jpg'}, {'emotion': 'Contentment', 'intensity': '3', 'reason': 'th…
4	No safe haven as shootings rock US schools	anonymous-source/all_shooting_images_newest/10827.jpg	[{'emotion': 'Disgust', 'intensity': '4', 'reason': 'we live in a country where shootings are prominent '}, {'emotion': 'Fear', 'intensity': '3', 'reason': "If school also isn't safe, what else place would be safe? "}, {'emotion': 'Fear', 'intensity': '2', 'reason': 'anything bad related to gun shooting make me feel bad and sad '}, {'emotion': 'Sadness', 'intensity': '3', 'reason': 'there have be…	[{'emotion': 'Sadness', 'intensity': '2', 'reason': 'Shooting probably already happened, policeman are coming to clear the mess.'}, {'emotion': 'Sadness', 'intensity': '4', 'reason': 'knowing there are school shootings that happen frequently, seeing something like this would definitely make me sad'}, {'emotion': 'Anger', 'intensity': '3', 'reason': 'This reminds me of the Rancho Tehama school sho…	[{'emotion': 'Sadness', 'intensity': '3', 'reason': 'students are innocent', 'url': 'anonymous-source/all_shooting_images_newest/10827.jpg'}, {'emotion': 'Fear', 'intensity': '4', 'reason': "I don't like the idea that something bad is happening at school", 'url': 'anonymous-source/all_shooting_images_newest/10827.jpg'}, {'emotion': 'Fear', 'intensity': '3', 'reason': 'this shooting phenomenon is …
5	Trump says close to finalizing effective ban on gun bump stocks	anonymous-source/all_shooting_images_newest/100422.jpg	[{'emotion': 'Excitement', 'intensity': '4', 'reason': 'because they are giving trump credit for something that is important for our country '}, {'emotion': 'Excitement', 'intensity': '3', 'reason': 'It may be a potential improvement on the current situation regarding gun violence because of the ban'}, {'emotion': 'Contentment', 'intensity': '2', 'reason': 'something good is happening '}, {'emoti…	[{'emotion': 'Contentment', 'intensity': '3', 'reason': "The design looks good, but I don't think it relate to gun violence."}, {'emotion': 'Fear', 'intensity': '4', 'reason': "I believe civilian possession of guns should be regulated strictly, so I'm scared of any mentions of guns and violence surrounding around it "}, {'emotion': 'Fear', 'intensity': '3', 'reason': 'guns in reality (vs. guns in…	[{'emotion': 'Excitement', 'intensity': '2', 'reason': 'its what i hope for', 'url': 'anonymous-source/all_shooting_images_newest/100422.jpg'}, {'emotion': 'Fear', 'intensity': '4', 'reason': 'Guns are not legal in Canada so I am uneasy', 'url': 'anonymous-source/all_shooting_images_newest/100422.jpg'}, {'emotion': 'Contentment', 'intensity': '3', 'reason': 'guns need to be regulated.', 'url': 'a…
6	Teenagers will lead the charge and demand change at anti-gun violence March for Our Lives	anonymous-source/all_shooting_images_newest/10466.jpg	[{'emotion': 'Excitement', 'intensity': '4', 'reason': 'it talks of change '}, {'emotion': 'Excitement', 'intensity': '4', 'reason': 'Glad to see how teenagers speak up regarding anti-gun violence. The power of teenagers should not be neglected.'}, {'emotion': 'Contentment', 'intensity': '2', 'reason': 'not really feeling anything '}, {'emotion': 'Awe', 'intensity': '3', 'reason': 'teenagers are …	[{'emotion': 'Amusement', 'intensity': '3', 'reason': "I feel people's emotion toward the gun violence in a passion way."}, {'emotion': 'Contentment', 'intensity': '3', 'reason': "It's good to see the young generation standing up against possession of arms"}, {'emotion': 'Excitement', 'intensity': '3', 'reason': 'people protesting about gun control makes me excited, and hopeful that the country w…	[{'emotion': 'Amusement', 'intensity': '3', 'reason': 'teenagers are brave', 'url': 'anonymous-source/all_shooting_images_newest/10466.jpg'}, {'emotion': 'Amusement', 'intensity': '4', 'reason': 'I feel happy looking at excited people', 'url': 'anonymous-source/all_shooting_images_newest/10466.jpg'}, {'emotion': 'Excitement', 'intensity': '3', 'reason': 'This campaign is for the good thing', 'url…
7	Pittsburgh synagogue shooting: Portraits of the 11 victims	anonymous-source/all_shooting_images_newest/100385.jpg	[{'emotion': 'Disgust', 'intensity': '4', 'reason': 'people were killed based on their religion '}, {'emotion': 'Awe', 'intensity': '5', 'reason': 'It is always good to remember these victims. Only by remembering them, we can feel the pain and call for changes.'}, {'emotion': 'Contentment', 'intensity': '2', 'reason': 'no specific feeling'}, {'emotion': 'Sadness', 'intensity': '3', 'reason': 'the…	[{'emotion': 'Sadness', 'intensity': '3', 'reason': 'Innocent people have been murdered by gun violence.'}, {'emotion': 'Sadness', 'intensity': '4', 'reason': 'looks like these people went through a terrible loss of someone close because of gun violence '}, {'emotion': 'Sadness', 'intensity': '4', 'reason': 'this makes me think of the victims of gun violence'}, {'emotion': 'Sadness', 'intensity':…	[{'emotion': 'Sadness', 'intensity': '3', 'reason': 'people died because of hate crimes', 'url': 'anonymous-source/all_shooting_images_newest/100385.jpg'}, {'emotion': 'Sadness', 'intensity': '4', 'reason': 'I get sad seeing other people struggling or upset', 'url': 'anonymous-source/all_shooting_images_newest/100385.jpg'}, {'emotion': 'Sadness', 'intensity': '3', 'reason': 'this tragedy is sad',…
8	Adult, juvenile charged in BB gun incident that prompted Elgin school to go into 'secure' mode	anonymous-source/all_shooting_images_newest/413.jpg	[{'emotion': 'Sadness', 'intensity': '3', 'reason': 'for the school but also the child if it was an accident '}, {'emotion': 'Contentment', 'intensity': '3', 'reason': 'Elgin school would protect its students in a more effective way'}, {'emotion': 'Contentment', 'intensity': '2', 'reason': "the school is taking gun seriously and are careful about gun even if is a fake gun. School really care abou…	[{'emotion': 'Fear', 'intensity': '3', 'reason': 'What if innocent children have been related to the gun violence.'}, {'emotion': 'Sadness', 'intensity': '3', 'reason': "schools being a common target of gun violence is one of the most saddening truths of today's era "}, {'emotion': 'Fear', 'intensity': '1', 'reason': "I don't know that happened at this school but I fear that it is another school …	[{'emotion': 'Sadness', 'intensity': '2', 'reason': 'its dangerous for the students', 'url': 'anonymous-source/all_shooting_images_newest/413.jpg'}, {'emotion': 'Contentment', 'intensity': '2', 'reason': "I don't feel a certain way about this photo just relaxed because there is not much going on ", 'url': 'anonymous-source/all_shooting_images_newest/413.jpg'}, {'emotion': 'Contentment', 'intensit…
9	Why feminism and racism have a lot to do with the gun debate	anonymous-source/all_shooting_images_newest/10791.jpg	[{'emotion': 'Amusement', 'intensity': '2', 'reason': "I don't know how feminism relates "}, {'emotion': 'Excitement', 'intensity': '3', 'reason': 'I am glad to read more about this kind of news, which discuss the gun debate from different perspectives, such as feminism and racism.'}, {'emotion': 'Contentment', 'intensity': '2', 'reason': 'no feeling '}, {'emotion': 'Amusement', 'intensity': '3',…	[{'emotion': 'Excitement', 'intensity': '4', 'reason': 'People may think about deal with the aftermath of the gun violence.'}, {'emotion': 'Amusement', 'intensity': '3', 'reason': 'It would be interesting to know the conversations that happen in such places'}, {'emotion': 'Contentment', 'intensity': '3', 'reason': 'i think the people, whoever they are, are having a sincere conversation about some…	[{'emotion': 'Excitement', 'intensity': '3', 'reason': 'I feel like there will be interesting point of view in this news', 'url': 'anonymous-source/all_shooting_images_newest/10791.jpg'}, {'emotion': 'Excitement', 'intensity': '2', 'reason': 'I feel engaged ', 'url': 'anonymous-source/all_shooting_images_newest/10791.jpg'}, {'emotion': 'Awe', 'intensity': '3', 'reason': 'I want to hear his reason…
10	Family that took in Florida shooting suspect call him a 'monster' and say they had no clue what he was planning	anonymous-source/all_shooting_images_newest/10551.jpg	[{'emotion': 'Sadness', 'intensity': '4', 'reason': 'they probably feel some responsibility '}, {'emotion': 'Disgust', 'intensity': '2', 'reason': "It seems like they are trying to get rid of the relationship with the shooting suspect, though I might be wrong because I don't know the full story."}, {'emotion': 'Sadness', 'intensity': '2', 'reason': 'understand why the family say this '}, {'emotio…	[{'emotion': 'Anger', 'intensity': '4', 'reason': 'He may be one the murder.'}, {'emotion': 'Amusement', 'intensity': '3', 'reason': "i don't have context if the person is a victim or perpetrator here"}, {'emotion': 'Fear', 'intensity': '5', 'reason': "I'm scared to look at this person and I can't even imagine what he'd do if I'm meeting him in person. it's even more scary to think about what he …	[{'emotion': 'Fear', 'intensity': '3', 'reason': 'the man looks strange', 'url': 'anonymous-source/all_shooting_images_newest/10551.jpg'}, {'emotion': 'Fear', 'intensity': '2', 'reason': 'He is staring right at the camera so it looks like he is staring at me which is intimidating', 'url': 'anonymous-source/all_shooting_images_newest/10551.jpg'}, {'emotion': 'Sadness', 'intensity': '3', 'reason': …
11	U.S. Needs Tougher Gun Laws to Stop Dementia Patients Killing Themselves and Others, Scientists Warn	anonymous-source/all_shooting_images_newest/110045.jpg	[{'emotion': 'Anger', 'intensity': '3', 'reason': 'that is not the issue with guns '}, {'emotion': 'Contentment', 'intensity': '5', 'reason': 'this statement is true.'}, {'emotion': 'Contentment', 'intensity': '2', 'reason': 'gun control need to be taken more serious and strict'}, {'emotion': 'Sadness', 'intensity': '3', 'reason': 'dementia patients are also victims suffering from mental illnesse…	[{'emotion': 'Fear', 'intensity': '3', 'reason': 'Fear that what of the gun is pointing at me.'}, {'emotion': 'Contentment', 'intensity': '3', 'reason': 'dont know the context of this picture'}, {'emotion': 'Fear', 'intensity': '3', 'reason': "I'm anxious because it's a white guy holding a gun. almost all mass shootings are involved with a white guy killing people. "}, {'emotion': 'Fear', 'intens…	[{'emotion': 'Fear', 'intensity': '3', 'reason': 'its a big threat', 'url': 'anonymous-source/all_shooting_images_newest/110045.jpg'}, {'emotion': 'Fear', 'intensity': '4', 'reason': 'Because the gun is actually aimed it is very scary and intimidating ', 'url': 'anonymous-source/all_shooting_images_newest/110045.jpg'}, {'emotion': 'Contentment', 'intensity': '3', 'reason': 'yeah, the laws should …
12	Trump urges lawmakers to buck NRA every once in a while	anonymous-source/all_shooting_images_newest/10336.jpg	[{'emotion': 'Fear', 'intensity': '2', 'reason': "I don't really know what this means "}, {'emotion': 'Contentment', 'intensity': '5', 'reason': "I think it's good to give NRA pressure"}, {'emotion': 'Contentment', 'intensity': '2', 'reason': "don't know what NRA is "}, {'emotion': 'Amusement', 'intensity': '3', 'reason': "I don't think the urging will make a difference."}, {'emotion': 'Disgust',…	[{'emotion': 'Anger', 'intensity': '4', 'reason': 'Politicians do not care about the gun control.'}, {'emotion': 'Disgust', 'intensity': '3', 'reason': "Donald Trump shouldn't be allowed to speak to public and it's disgusting to see him have an opinion on gun control"}, {'emotion': 'Anger', 'intensity': '3', 'reason': 'looking at donald trump always reminds me of how he framed the covid and chine…	[{'emotion': 'Disgust', 'intensity': '1', 'reason': "I don't know much about the context", 'url': 'anonymous-source/all_shooting_images_newest/10336.jpg'}, {'emotion': 'Disgust', 'intensity': '5', 'reason': "I don't like trump ", 'url': 'anonymous-source/all_shooting_images_newest/10336.jpg'}, {'emotion': 'Amusement', 'intensity': '3', 'reason': 'Trump does not know the thing.', 'url': 'anonymous…
13	It's the ultimate gun loophole': Democrats blame Trump for 3D gun prints Video	anonymous-source/all_shooting_images_newest/422.jpg	[{'emotion': 'Contentment', 'intensity': '3', 'reason': 'I need more information '}, {'emotion': 'Contentment', 'intensity': '1', 'reason': 'The 3D gun prints video might be a reason'}, {'emotion': 'Amusement', 'intensity': '2', 'reason': 'no feeling'}, {'emotion': 'Amusement', 'intensity': '3', 'reason': 'it might be the one thing Trump might not actually be responsible for.'}, {'emotion': 'Sadn…	[{'emotion': 'Anger', 'intensity': '4', 'reason': 'Politicians do not care about the gun control.'}, {'emotion': 'Amusement', 'intensity': '3', 'reason': 'dont know the context of this picture'}, {'emotion': 'Fear', 'intensity': '3', 'reason': "I don't know if the person is advocating for gun use or the opposite, but it scares me because of the facial expression of the woman standing behind him. …	[{'emotion': 'Contentment', 'intensity': '3', 'reason': 'people should stand out to express their opinions', 'url': 'anonymous-source/all_shooting_images_newest/422.jpg'}, {'emotion': 'Fear', 'intensity': '4', 'reason': "I don't like talking about violence or guns and this looks scary", 'url': 'anonymous-source/all_shooting_images_newest/422.jpg'}, {'emotion': 'Amusement', 'intensity': '3', 'reas…
14	The shooting at a Madden video game tournament in Florida has shaken esports gamers and leagues in the fast-growing industry	anonymous-source/all_shooting_images_newest/12.jpg	[{'emotion': 'Sadness', 'intensity': '3', 'reason': 'this was a shooting in an event with innocence '}, {'emotion': 'Sadness', 'intensity': '2', 'reason': 'it is sorry to see the industry is influenced by these negative stories'}, {'emotion': 'Fear', 'intensity': '2', 'reason': 'feel bad about this people in the tournament '}, {'emotion': 'Sadness', 'intensity': '3', 'reason': 'the shooting in re…	[{'emotion': 'Fear', 'intensity': '4', 'reason': 'Feeling uneasy about the gun violence.'}, {'emotion': 'Contentment', 'intensity': '3', 'reason': "I think i'll be fine in the presence of police officers being armed in public like this"}, {'emotion': 'Fear', 'intensity': '3', 'reason': "I feel sad when there's police being in an area where there's no one there, I can only assume that something ba…	[{'emotion': 'Sadness', 'intensity': '1', 'reason': "I don't care", 'url': 'anonymous-source/all_shooting_images_newest/12.jpg'}, {'emotion': 'Awe', 'intensity': '4', 'reason': 'the setting is pleasant so I feel relaxed ', 'url': 'anonymous-source/all_shooting_images_newest/12.jpg'}, {'emotion': 'Contentment', 'intensity': '3', 'reason': 'some industries shall get involved', 'url': 'anonymous-sou…
15	Doctors Need to Talk to Families About Guns and Dementia	anonymous-source/all_shooting_images_newest/100427.jpg	[{'emotion': 'Sadness', 'intensity': '3', 'reason': 'this is an obvious thing '}, {'emotion': 'Excitement', 'intensity': '5', 'reason': ' I really want to see if this will impact gun violence in the future'}, {'emotion': 'Contentment', 'intensity': '2', 'reason': "sounds good but don't know why it is doctors to do so "}, {'emotion': 'Sadness', 'intensity': '3', 'reason': 'violence and mental illn…	[{'emotion': 'Disgust', 'intensity': '2', 'reason': 'Bright Picture with gun is weird.'}, {'emotion': 'Anger', 'intensity': '3', 'reason': 'the presence of arms in our surroundings is scary to me'}, {'emotion': 'Disgust', 'intensity': '3', 'reason': "even though it's a toy gun, I don't think it's appropriate, and I feel disgusted that I once played with one"}, {'emotion': 'Fear', 'intensity': '1'…	[{'emotion': 'Excitement', 'intensity': '2', 'reason': 'I agree this', 'url': 'anonymous-source/all_shooting_images_newest/100427.jpg'}, {'emotion': 'Amusement', 'intensity': '2', 'reason': "the gun looks fake so I don't feel as intimidated by it ", 'url': 'anonymous-source/all_shooting_images_newest/100427.jpg'}, {'emotion': 'Contentment', 'intensity': '3', 'reason': 'yeah, they should talk', 'u…
16	Hundreds of Malibu students and their families march against gun violence, call for stricter gun control laws	anonymous-source/all_shooting_images_newest/10475.jpg	[{'emotion': 'Awe', 'intensity': '4', 'reason': 'it is empowering '}, {'emotion': 'Awe', 'intensity': '3', 'reason': 'They are full of courage to call for an action'}, {'emotion': 'Contentment', 'intensity': '2', 'reason': 'support them to do so '}, {'emotion': 'Sadness', 'intensity': '3', 'reason': 'students and their families are the people who are impacted by the gun violence at schools the mo…	[{'emotion': 'Sadness', 'intensity': '2', 'reason': 'It makes me feel the aftermath of gun violence.'}, {'emotion': 'Sadness', 'intensity': '3', 'reason': "no one shouldn't have to go through this kind of pain"}, {'emotion': 'Sadness', 'intensity': '3', 'reason': "I'm sad because this is supposed to appear in places like government offices, instead of on the walls that no policymakers will see or…	[{'emotion': 'Excitement', 'intensity': '4', 'reason': 'its a good starting point for change', 'url': 'anonymous-source/all_shooting_images_newest/10475.jpg'}, {'emotion': 'Sadness', 'intensity': '2', 'reason': 'I feel bad that people are living through such hardships ', 'url': 'anonymous-source/all_shooting_images_newest/10475.jpg'}, {'emotion': 'Sadness', 'intensity': '3', 'reason': 'it seems l…
17	Pittsburgh shooting: US Muslim groups raise more than $110,000 for synagogue attack victims	anonymous-source/all_shooting_images_newest/100398.jpg	[{'emotion': 'Awe', 'intensity': '4', 'reason': 'it restores faith in humanity '}, {'emotion': 'Awe', 'intensity': '3', 'reason': 'the willingness to help others worths respect'}, {'emotion': 'Contentment', 'intensity': '2', 'reason': 'sounds good and the victim deserve help '}, {'emotion': 'Sadness', 'intensity': '3', 'reason': 'religious hostility causes unnecessary violence and death.'}, {'emo…	[{'emotion': 'Sadness', 'intensity': '2', 'reason': 'It makes me feel the aftermath of gun violence.'}, {'emotion': 'Sadness', 'intensity': '3', 'reason': "This looks really awful and no one shouldn't have to go through this pain"}, {'emotion': 'Sadness', 'intensity': '3', 'reason': 'I feel sad when people die, but at the same time, how people care about and remember the passed makes me less sad'…	[{'emotion': 'Excitement', 'intensity': '3', 'reason': 'people care about each other', 'url': 'anonymous-source/all_shooting_images_newest/100398.jpg'}, {'emotion': 'Contentment', 'intensity': '2', 'reason': 'I feel relaxed because the lighting is dim and the flowers make me happy ', 'url': 'anonymous-source/all_shooting_images_newest/100398.jpg'}, {'emotion': 'Excitement', 'intensity': '3', 'rea…
18	Texas school district accepts gun donations 2 months after deadly school shooting	anonymous-source/all_shooting_images_newest/463.jpg	[{'emotion': 'Disgust', 'intensity': '3', 'reason': 'why would they do that after a shooting \r\n'}, {'emotion': 'Anger', 'intensity': '3', 'reason': 'how can they accepts gun donations just after someone dies because of the gun 2 months ago? '}, {'emotion': 'Contentment', 'intensity': '2', 'reason': 'the school is reasonable to receive the donation '}, {'emotion': 'Disgust', 'intensity': '3', 'r…	[{'emotion': 'Sadness', 'intensity': '2', 'reason': 'It makes me feel the aftermath of gun violence.'}, {'emotion': 'Fear', 'intensity': '3', 'reason': "looks like a school case of violence and that's very scary for me"}, {'emotion': 'Fear', 'intensity': '3', 'reason': "something traumatic clearly happened to the girl and it makes me scared to think it's possibly a shooting at this school"}, {'em…	[{'emotion': 'Fear', 'intensity': '1', 'reason': "I don't know why", 'url': 'anonymous-source/all_shooting_images_newest/463.jpg'}, {'emotion': 'Sadness', 'intensity': '5', 'reason': 'seeing other people stressed makes me anxious', 'url': 'anonymous-source/all_shooting_images_newest/463.jpg'}, {'emotion': 'Sadness', 'intensity': '3', 'reason': 'We should learn about the seriousness of gun shootin…
19	Sanders addresses Trump's wavering position on guns Video	anonymous-source/all_shooting_images_newest/10818.jpg	[{'emotion': 'Contentment', 'intensity': '3', 'reason': 'it needs to be addressed '}, {'emotion': 'Contentment', 'intensity': '2', 'reason': "It's good to have a stable position"}, {'emotion': 'Contentment', 'intensity': '2', 'reason': 'good to see people showing attitude to things that matter'}, {'emotion': 'Fear', 'intensity': '3', 'reason': 'attitude of the leader of the country on gun control…	[{'emotion': 'Fear', 'intensity': '2', 'reason': 'Gun violence is a serious issue.'}, {'emotion': 'Amusement', 'intensity': '3', 'reason': 'Looks like a govt. announcement is about to happen here, and it is always interesting to know the regulations update on gun control basis the increasing gun violence incidents over the years'}, {'emotion': 'Anger', 'intensity': '1', 'reason': 'feel neutral he…	[{'emotion': 'Disgust', 'intensity': '2', 'reason': 'the president should not waver about his position', 'url': 'anonymous-source/all_shooting_images_newest/10818.jpg'}, {'emotion': 'Contentment', 'intensity': '2', 'reason': "I feel like I'm sitting at home in a natural setting just watching tv. ", 'url': 'anonymous-source/all_shooting_images_newest/10818.jpg'}, {'emotion': 'Contentment', 'intens…
20	North Carolina high school shooting stemmed from bullying that escalated out of control, officials say	anonymous-source/all_shooting_images_newest/100479.jpg	[{'emotion': 'Sadness', 'intensity': '4', 'reason': 'If some people can intervene in the situation before the tragedy happens, everything can be different.'}, {'emotion': 'Fear', 'intensity': '3', 'reason': 'bullying '}, {'emotion': 'Disgust', 'intensity': '3', 'reason': "can't believe this happens"}, {'emotion': 'Fear', 'intensity': '4', 'reason': 'school shooting is terrifying'}, {'emotion': 'S…	[{'emotion': 'Sadness', 'intensity': '3', 'reason': 'Sadness'}, {'emotion': 'Sadness', 'intensity': '3', 'reason': 'It is sad that young kids get their hands on guns.'}, {'emotion': 'Anger', 'intensity': '2', 'reason': "While I don't know if this person's apparent arrest is lawful or not, I am still reminded of the treatment of Black people by the US police system and the association people tend …	[{'emotion': 'Fear', 'intensity': '3', 'reason': 'Pictures are creepy and would be terrified of this happening to me.', 'url': 'anonymous-source/all_shooting_images_newest/100479.jpg'}, {'emotion': 'Anger', 'intensity': '3', 'reason': 'Teenagers who illegally use guns should be severely punished.', 'url': 'anonymous-source/all_shooting_images_newest/100479.jpg'}, {'emotion': 'Sadness', 'intensity…
21	Doctors pay tribute to Chicago shooting victim Tamara O'Neal, MD:'We are so sorry we couldn't protect you'	anonymous-source/all_shooting_images_newest/110264.jpg	[{'emotion': 'Sadness', 'intensity': '3', 'reason': 'Sad for victims.'}, {'emotion': 'Fear', 'intensity': '3', 'reason': 'failure to protect '}, {'emotion': 'Sadness', 'intensity': '2', 'reason': 'This is so sad'}, {'emotion': 'Awe', 'intensity': '4', 'reason': 'He said we could not protect you'}, {'emotion': 'Sadness', 'intensity': '4', 'reason': 'Doctors do as much as they can to save lives and…	[{'emotion': 'Sadness', 'intensity': '3', 'reason': 'Sadness\r\n'}, {'emotion': 'Contentment', 'intensity': '3', 'reason': 'Not sure why they are celebrating but I hope it is positive.'}, {'emotion': 'Contentment', 'intensity': '3', 'reason': 'I am happy to see these people celebrating something so joyous.'}, {'emotion': 'Excitement', 'intensity': '4', 'reason': 'I feel joy by being reminded of p…	[{'emotion': 'Sadness', 'intensity': '3', 'reason': 'Saddened by the helplessness of this situation, while sympathizing with the person in the picture.', 'url': 'anonymous-source/all_shooting_images_newest/110264.jpg'}, {'emotion': 'Sadness', 'intensity': '3', 'reason': 'This sense of apology and guilt makes me feel sad and helpless.', 'url': 'anonymous-source/all_shooting_images_newest/110264.jp…
22	Kasich s campaign website tones down gun language after Florida shooting	anonymous-source/all_shooting_images_newest/10727.jpg	[{'emotion': 'Sadness', 'intensity': '2', 'reason': 'It seems a political strategy.'}, {'emotion': 'Sadness', 'intensity': '3', 'reason': 'shooting '}, {'emotion': 'Amusement', 'intensity': '3', 'reason': 'Was he talking a lot about guns?'}, {'emotion': 'Fear', 'intensity': '3', 'reason': 'I do not like it '}, {'emotion': 'Sadness', 'intensity': '3', 'reason': 'no language has to be toned down. T…	[{'emotion': 'Anger', 'intensity': '3', 'reason': 'Anger'}, {'emotion': 'Anger', 'intensity': '3', 'reason': 'I do not know who he is but I hope he is not talking about gun rights.'}, {'emotion': 'Anger', 'intensity': '1', 'reason': 'Since I do not know who this person is, I left my response as mild. However, I wonder if the speaker is arguing in favor of loose gun rights.'}, {'emotion': 'Anger',…	[{'emotion': 'Anger', 'intensity': '3', 'reason': 'Anger at the fact that everyone is not taking this harmful situation seriously.', 'url': 'anonymous-source/all_shooting_images_newest/10727.jpg'}, {'emotion': 'Anger', 'intensity': '3', 'reason': 'I think it is also irresponsible to decide to find a way to solve it after it happened.', 'url': 'anonymous-source/all_shooting_images_newest/10727.jpg…
23	Bloomberg criticizes Trump after Pittsburgh shooting	anonymous-source/all_shooting_images_newest/100079.jpg	[{'emotion': 'Contentment', 'intensity': '3', 'reason': 'People should pay more attention to the shooting.'}, {'emotion': 'Fear', 'intensity': '3', 'reason': 'shooting '}, {'emotion': 'Amusement', 'intensity': '3', 'reason': 'I think he is attacking the wrong person. Trump would freak out'}, {'emotion': 'Excitement', 'intensity': '3', 'reason': 'I do not like trump'}, {'emotion': 'Contentment', '…	[{'emotion': 'Contentment', 'intensity': '3', 'reason': 'Contentment\r\n'}, {'emotion': 'Contentment', 'intensity': '3', 'reason': "I am not sure what Bloomberg's stance is on gun rights"}, {'emotion': 'Fear', 'intensity': '1', 'reason': 'I do not recognize this person'}, {'emotion': 'Disgust', 'intensity': '4', 'reason': 'I am reminded of rich people that make profit off of less advantaged peopl…	[{'emotion': 'Amusement', 'intensity': '3', 'reason': 'The headlines look like normal real-time commentary news, but the pictures look funny.', 'url': 'anonymous-source/all_shooting_images_newest/100079.jpg'}, {'emotion': 'Contentment', 'intensity': '3', 'reason': "it's the president's responsibility to think for the country's peace, but the numerous shooting cases show that people do not feel pe…
24	Harley Rouda 3D-printed guns are coming to America unless Congress acts. But the NRA doesn't want them to.	anonymous-source/all_shooting_images_newest/125.jpg	[{'emotion': 'Fear', 'intensity': '3', 'reason': 'I am afraid that 3D-printed guns may lead to more shootings.'}, {'emotion': 'Anger', 'intensity': '3', 'reason': "I don't agree "}, {'emotion': 'Awe', 'intensity': '3', 'reason': '3D guns are already here'}, {'emotion': 'Sadness', 'intensity': '3', 'reason': 'I do not like it '}, {'emotion': 'Fear', 'intensity': '3', 'reason': 'why 3D print a gun?…	[{'emotion': 'Fear', 'intensity': '3', 'reason': 'Fear'}, {'emotion': 'Sadness', 'intensity': '1', 'reason': 'I am not a fan of guns.'}, {'emotion': 'Anger', 'intensity': '1', 'reason': "I do not know the context of the image, so I'm trying not to have a strong opinion."}, {'emotion': 'Fear', 'intensity': '4', 'reason': 'I feel afraid because I am reminded of guns that are used to hurt people'}, …	[{'emotion': 'Fear', 'intensity': '3', 'reason': 'Brings to my attention a new danger.', 'url': 'anonymous-source/all_shooting_images_newest/125.jpg'}, {'emotion': 'Anger', 'intensity': '3', 'reason': 'This news makes me feel that the malignant gun event is very close to people.', 'url': 'anonymous-source/all_shooting_images_newest/125.jpg'}, {'emotion': 'Contentment', 'intensity': '3', 'reason':…
25	Will Congress move on gun control?	anonymous-source/all_shooting_images_newest/100480.jpg	[{'emotion': 'Excitement', 'intensity': '3', 'reason': 'I want to know the result.'}, {'emotion': 'Excitement', 'intensity': '3', 'reason': 'I wish they will '}, {'emotion': 'Contentment', 'intensity': '3', 'reason': 'Maybe'}, {'emotion': 'Disgust', 'intensity': '3', 'reason': 'I do not like it '}, {'emotion': 'Anger', 'intensity': '1', 'reason': "congress needs to act on gun control quickly in o…	[{'emotion': 'Anger', 'intensity': '3', 'reason': 'Anger'}, {'emotion': 'Disgust', 'intensity': '4', 'reason': 'I do not like how people think guns represent america.'}, {'emotion': 'Anger', 'intensity': '4', 'reason': 'The excessive ownership of rifles being portrayed as an American right is infuriating to me.'}, {'emotion': 'Fear', 'intensity': '5', 'reason': 'I am reminded of guns that hurt pe…	[{'emotion': 'Excitement', 'intensity': '3', 'reason': 'Will be excited to expect a good answer to this question.', 'url': 'anonymous-source/all_shooting_images_newest/100480.jpg'}, {'emotion': 'Amusement', 'intensity': '3', 'reason': 'I think Congress should take responsibility on gun control.', 'url': 'anonymous-source/all_shooting_images_newest/100480.jpg'}, {'emotion': 'Contentment', 'intensi…
26	November 5 10:15 PM Rally brings together thousands in wake of deadly synagogue shooting	anonymous-source/all_shooting_images_newest/110416.jpg	[{'emotion': 'Fear', 'intensity': '3', 'reason': 'I am afraid of shooting.'}, {'emotion': 'Fear', 'intensity': '3', 'reason': 'shooting '}, {'emotion': 'Disgust', 'intensity': '5', 'reason': 'Anti-semetic stuff is so sad'}, {'emotion': 'Awe', 'intensity': '3', 'reason': 'I do not like it '}, {'emotion': 'Sadness', 'intensity': '5', 'reason': 'The rally is truly moving and it pays respect to the v…	[{'emotion': 'Contentment', 'intensity': '3', 'reason': 'Contentment'}, {'emotion': 'Contentment', 'intensity': '2', 'reason': 'I hope that they are all safe from gun violence.'}, {'emotion': 'Fear', 'intensity': '1', 'reason': 'I do not recognize the speaker'}, {'emotion': 'Excitement', 'intensity': '4', 'reason': 'I feel hope for people ending the use of guns'}, {'emotion': 'Sadness', 'intensit…	[{'emotion': 'Fear', 'intensity': '3', 'reason': 'Sympathy for the victims and hope these things never happen again.', 'url': 'anonymous-source/all_shooting_images_newest/110416.jpg'}, {'emotion': 'Sadness', 'intensity': '3', 'reason': 'It is sad to realize the impact of guns on people of different races.', 'url': 'anonymous-source/all_shooting_images_newest/110416.jpg'}, {'emotion': 'Awe', 'inte…
27	Chicago police chief calls 58 shootings in 3 days 'tragic, senseless and cowardly'	anonymous-source/all_shooting_images_newest/259.jpg	[{'emotion': 'Fear', 'intensity': '3', 'reason': '58 shootings in 3 days. It is insane and unbelievable.'}, {'emotion': 'Sadness', 'intensity': '3', 'reason': 'shooting '}, {'emotion': 'Awe', 'intensity': '3', 'reason': 'Is it going to change?'}, {'emotion': 'Anger', 'intensity': '3', 'reason': 'I do not like it '}, {'emotion': 'Sadness', 'intensity': '3', 'reason': 'the government needs to make …	[{'emotion': 'Fear', 'intensity': '3', 'reason': 'Fear'}, {'emotion': 'Fear', 'intensity': '3', 'reason': 'I hope that everyone at that subway was safe and I am scared that there was a shooting there.'}, {'emotion': 'Anger', 'intensity': '2', 'reason': "While I don't fully know the context of the picture, I imagine the police officer is acting inappropriately at the scene of a crime"}, {'emotion'…	[{'emotion': 'Anger', 'intensity': '3', 'reason': 'The picture shows what happened, the real situation is sad and scary.', 'url': 'anonymous-source/all_shooting_images_newest/259.jpg'}, {'emotion': 'Anger', 'intensity': '3', 'reason': 'I think it is irresponsible to judge the bad results after it happened.', 'url': 'anonymous-source/all_shooting_images_newest/259.jpg'}, {'emotion': 'Anger', 'inte…
28	Bank of America to stop lending to military-style weapons makers	anonymous-source/all_shooting_images_newest/10391.jpg	[{'emotion': 'Contentment', 'intensity': '3', 'reason': 'Weapons makers are dangerous.'}, {'emotion': 'Excitement', 'intensity': '3', 'reason': 'they did the right thing '}, {'emotion': 'Amusement', 'intensity': '3', 'reason': 'Why is BOA giving guns?'}, {'emotion': 'Amusement', 'intensity': '3', 'reason': 'I like it '}, {'emotion': 'Contentment', 'intensity': '3', 'reason': "if they sell them on…	[{'emotion': 'Contentment', 'intensity': '3', 'reason': 'Contentment'}, {'emotion': 'Contentment', 'intensity': '3', 'reason': 'I am not sure what Bank of America has to do with gun violence.'}, {'emotion': 'Contentment', 'intensity': '1', 'reason': 'I feel rather indifferent to this bank and its title'}, {'emotion': 'Fear', 'intensity': '4', 'reason': 'I feel afraid because of how people can be …	[{'emotion': 'Contentment', 'intensity': '3', 'reason': 'It is joyful and hopeful to see these positive actions.', 'url': 'anonymous-source/all_shooting_images_newest/10391.jpg'}, {'emotion': 'Contentment', 'intensity': '3', 'reason': 'I think it is a good trend.', 'url': 'anonymous-source/all_shooting_images_newest/10391.jpg'}, {'emotion': 'Anger', 'intensity': '3', 'reason': "I don't think bank…
29	Nashville gay bar owners say they feel threatened by a picture of a gun on pro-Trump LGBT flyers	anonymous-source/all_shooting_images_newest/100163.jpg	[{'emotion': 'Anger', 'intensity': '3', 'reason': 'The picture is offending.'}, {'emotion': 'Fear', 'intensity': '3', 'reason': 'gun '}, {'emotion': 'Awe', 'intensity': '5', 'reason': 'Where is the gun?'}, {'emotion': 'Excitement', 'intensity': '3', 'reason': 'I like it '}, {'emotion': 'Sadness', 'intensity': '3', 'reason': 'It seems like Trumps typical label'}, {'emotion': 'Sadness', 'intensity'…	[{'emotion': 'Disgust', 'intensity': '3', 'reason': 'Disgust'}, {'emotion': 'Disgust', 'intensity': '5', 'reason': 'the image is horrible and is a disgusting mockery of the LGBT community.'}, {'emotion': 'Anger', 'intensity': '5', 'reason': 'The use of a marginalized group to promote an completely different ideology is infuriating, especially when considering whoever created this is likely not a …	[{'emotion': 'Anger', 'intensity': '3', 'reason': "It's sad that people have turned a group into a tool for political propaganda, and the images are shocking.", 'url': 'anonymous-source/all_shooting_images_newest/100163.jpg'}, {'emotion': 'Anger', 'intensity': '3', 'reason': "gun events threatens the public's lives indeed.", 'url': 'anonymous-source/all_shooting_images_newest/100163.jpg'}, {'emot…
30	The Kentucky Supermarket Shooting That Left Two Black People Dead Is Being Investigated As A Hate Crime	anonymous-source/all_shooting_images_newest/100493.jpg	[{'emotion': 'Sadness', 'intensity': '3', 'reason': 'Sad for the victims.'}, {'emotion': 'Fear', 'intensity': '3', 'reason': 'hate crime '}, {'emotion': 'Sadness', 'intensity': '4', 'reason': 'As it should a hate crime. '}, {'emotion': 'Fear', 'intensity': '3', 'reason': 'I do not like it '}, {'emotion': 'Sadness', 'intensity': '3', 'reason': 'more laws should be in place to avoid hate crimes '},…	[{'emotion': 'Disgust', 'intensity': '3', 'reason': 'Disgust'}, {'emotion': 'Fear', 'intensity': '3', 'reason': 'This man is scary-looking.'}, {'emotion': 'Contentment', 'intensity': '1', 'reason': 'I do not know the context of this image or the people featured in it.'}, {'emotion': 'Disgust', 'intensity': '5', 'reason': 'I feel disgust for people who use guns to hurt people'}, {'emotion': 'Anger…	[{'emotion': 'Disgust', 'intensity': '3', 'reason': 'The people in the pictures make me feel terrified.', 'url': 'anonymous-source/all_shooting_images_newest/100493.jpg'}, {'emotion': 'Sadness', 'intensity': '3', 'reason': 'The gun incident has indeed triggered sadness and hatred among people, even among races.', 'url': 'anonymous-source/all_shooting_images_newest/100493.jpg'}, {'emotion': 'Fear'…
31	Jemel Roberson: Demands for justice after Chicago police shoot dead 'hero'black security guard who successfully detained gunman	anonymous-source/all_shooting_images_newest/110297.jpg	[{'emotion': 'Sadness', 'intensity': '3', 'reason': 'The security guard should not be killed. The Chicago police did a wrong thing.'}, {'emotion': 'Contentment', 'intensity': '3', 'reason': "there's demand for justice "}, {'emotion': 'Amusement', 'intensity': '3', 'reason': 'You guys need to add more emotions to this list...'}, {'emotion': 'Sadness', 'intensity': '3', 'reason': 'I do not like it …	[{'emotion': 'Sadness', 'intensity': '3', 'reason': 'Sadness\r\n'}, {'emotion': 'Contentment', 'intensity': '3', 'reason': 'I do not know if he is a victim or a shooter.'}, {'emotion': 'Anger', 'intensity': '1', 'reason': "While I don't recognize this person, I worry that this image is one that was used after his death."}, {'emotion': 'Fear', 'intensity': '5', 'reason': 'I feel afraid for black p…	[{'emotion': 'Sadness', 'intensity': '3', 'reason': 'Feeling sympathy for what happened to him, the face in the photo made me respect him even more.', 'url': 'anonymous-source/all_shooting_images_newest/110297.jpg'}, {'emotion': 'Anger', 'intensity': '3', 'reason': "it's injustice.", 'url': 'anonymous-source/all_shooting_images_newest/110297.jpg'}, {'emotion': 'Sadness', 'intensity': '3', 'reason…
32	SNL,' with Alec Baldwin as Trump, addresses gun control after Parkland school shooting	anonymous-source/all_shooting_images_newest/10734.jpg	[{'emotion': 'Excitement', 'intensity': '3', 'reason': 'Some people are paying more attention to gun control.'}, {'emotion': 'Contentment', 'intensity': '3', 'reason': "there's progress on gun control "}, {'emotion': 'Awe', 'intensity': '3', 'reason': 'This literally makes no sense'}, {'emotion': 'Fear', 'intensity': '3', 'reason': 'I do not like it '}, {'emotion': 'Contentment', 'intensity': '1'…	[{'emotion': 'Amusement', 'intensity': '3', 'reason': 'Amusement'}, {'emotion': 'Amusement', 'intensity': '3', 'reason': 'SNL can be funny sometimes.'}, {'emotion': 'Disgust', 'intensity': '2', 'reason': "I don't generally find parodies of these political figures funny."}, {'emotion': 'Amusement', 'intensity': '5', 'reason': 'I am happy because people are highlighting the absurdness of presidents…	[{'emotion': 'Contentment', 'intensity': '3', 'reason': "It's nice to see someone mocking this thing, and the people in the picture look like themselves.", 'url': 'anonymous-source/all_shooting_images_newest/10734.jpg'}, {'emotion': 'Contentment', 'intensity': '3', 'reason': "don't know much about Alec Baldwin.", 'url': 'anonymous-source/all_shooting_images_newest/10734.jpg'}, {'emotion': 'Amusem…
33	Trump Offers Call for Unity After Shooting, Pivots to Rally Mode	anonymous-source/all_shooting_images_newest/100080.jpg	[{'emotion': 'Contentment', 'intensity': '3', 'reason': 'People should rally together to control guns.'}, {'emotion': 'Fear', 'intensity': '3', 'reason': 'shooting '}, {'emotion': 'Anger', 'intensity': '3', 'reason': 'What even is rally mode?!'}, {'emotion': 'Amusement', 'intensity': '3', 'reason': 'I like it '}, {'emotion': 'Disgust', 'intensity': '3', 'reason': 'Trump needs to do more than just…	[{'emotion': 'Amusement', 'intensity': '3', 'reason': 'Amusement\r\n'}, {'emotion': 'Disgust', 'intensity': '5', 'reason': 'I do not like Trump and think he is a terrible person.'}, {'emotion': 'Anger', 'intensity': '3', 'reason': 'I do not like this politician'}, {'emotion': 'Anger', 'intensity': '4', 'reason': 'I get angry by Presidents that promote guns'}, {'emotion': 'Anger', 'intensity': '5'…	[{'emotion': 'Fear', 'intensity': '3', 'reason': "It seems I don't care much about news about politicians.", 'url': 'anonymous-source/all_shooting_images_newest/100080.jpg'}, {'emotion': 'Amusement', 'intensity': '3', 'reason': 'unity should be called for in a more pragmatic manner.', 'url': 'anonymous-source/all_shooting_images_newest/100080.jpg'}, {'emotion': 'Excitement', 'intensity': '3', 're…
34	Gun-related homicides, suicides kill more people than war, study says	anonymous-source/all_shooting_images_newest/126.jpg	[{'emotion': 'Sadness', 'intensity': '3', 'reason': 'Gun-related homicides, suicides kill more people than war. It is pathetic.'}, {'emotion': 'Sadness', 'intensity': '3', 'reason': 'deaths related to gun violence '}, {'emotion': 'Awe', 'intensity': '3', 'reason': 'That is a very shocking stat'}, {'emotion': 'Sadness', 'intensity': '3', 'reason': 'I do not like it '}, {'emotion': 'Sadness', 'inte…	[{'emotion': 'Fear', 'intensity': '3', 'reason': 'Fear'}, {'emotion': 'Sadness', 'intensity': '3', 'reason': 'Guns take the lives of so many.'}, {'emotion': 'Anger', 'intensity': '2', 'reason': 'I would find this more angering if I could see more visual clues to tell me what this scenario is.'}, {'emotion': 'Disgust', 'intensity': '5', 'reason': 'I feel disgust at people that use guns'}, {'emotio…	[{'emotion': 'Fear', 'intensity': '3', 'reason': 'Terrified of this fact and terrified of the gun in the picture.', 'url': 'anonymous-source/all_shooting_images_newest/126.jpg'}, {'emotion': 'Sadness', 'intensity': '3', 'reason': 'It is sad to realize the bad, huge impact of guns on guns owners.', 'url': 'anonymous-source/all_shooting_images_newest/126.jpg'}, {'emotion': 'Sadness', 'intensity': '…
35	Spokane, Wash. ends gun sales by police after probe	anonymous-source/all_shooting_images_newest/110042.jpg	[{'emotion': 'Contentment', 'intensity': '3', 'reason': "Ending gun sales may save somebody's life."}, {'emotion': 'Contentment', 'intensity': '3', 'reason': 'ends gun sales'}, {'emotion': 'Awe', 'intensity': '3', 'reason': 'What is a probe?'}, {'emotion': 'Fear', 'intensity': '3', 'reason': 'I do not like it '}, {'emotion': 'Contentment', 'intensity': '4', 'reason': 'good on Washington for knowi…	[{'emotion': 'Fear', 'intensity': '3', 'reason': 'Fear\r\n'}, {'emotion': 'Anger', 'intensity': '3', 'reason': 'Guns should be banned.'}, {'emotion': 'Fear', 'intensity': '2', 'reason': "I am unsure about what the tags on these guns mean, and I'm worried about what the truth is"}, {'emotion': 'Anger', 'intensity': '5', 'reason': 'I feel anger at people that use guns to hurt people'}, {'emotion': …	[{'emotion': 'Excitement', 'intensity': '3', 'reason': 'These guns look scary, but the title reassures me.', 'url': 'anonymous-source/all_shooting_images_newest/110042.jpg'}, {'emotion': 'Contentment', 'intensity': '3', 'reason': "it's a good trend.", 'url': 'anonymous-source/all_shooting_images_newest/110042.jpg'}, {'emotion': 'Contentment', 'intensity': '3', 'reason': 'This picture does not inv…
36	Gun Control Groups Eclipse N.R.A. in Election Spending	anonymous-source/all_shooting_images_newest/110462.jpg	[{'emotion': 'Sadness', 'intensity': '3', 'reason': 'Gun control groups should not spend so much money on the election.'}, {'emotion': 'Sadness', 'intensity': '3', 'reason': 'gun '}, {'emotion': 'Awe', 'intensity': '3', 'reason': 'What does eclipsed mean?'}, {'emotion': 'Anger', 'intensity': '3', 'reason': 'I do not like it '}, {'emotion': 'Contentment', 'intensity': '3', 'reason': 'gun control s…	[{'emotion': 'Sadness', 'intensity': '3', 'reason': 'Sadness\r\n'}, {'emotion': 'Excitement', 'intensity': '3', 'reason': 'Hopefully we will have more gun safety laws.'}, {'emotion': 'Contentment', 'intensity': '4', 'reason': 'I am always glad to see members of different generations fighting for stricter gun laws.'}, {'emotion': 'Excitement', 'intensity': '4', 'reason': 'I feel joy that of people…	[{'emotion': 'Contentment', 'intensity': '3', 'reason': "The people in the pictures seem to have so many different emotions that I can't get to the point.", 'url': 'anonymous-source/all_shooting_images_newest/110462.jpg'}, {'emotion': 'Contentment', 'intensity': '3', 'reason': 'this is a good trend.', 'url': 'anonymous-source/all_shooting_images_newest/110462.jpg'}, {'emotion': 'Contentment', 'in…
37	Shooting at esports event in Florida raises calls for more security	anonymous-source/all_shooting_images_newest/313.jpg	[{'emotion': 'Contentment', 'intensity': '3', 'reason': 'People should pay more attention to gun control and security.'}, {'emotion': 'Excitement', 'intensity': '3', 'reason': 'more security '}, {'emotion': 'Fear', 'intensity': '3', 'reason': 'e-sports are dangerous'}, {'emotion': 'Disgust', 'intensity': '3', 'reason': 'I do not like it '}, {'emotion': 'Sadness', 'intensity': '4', 'reason': 'you …	[{'emotion': 'Fear', 'intensity': '3', 'reason': 'Fear'}, {'emotion': 'Fear', 'intensity': '3', 'reason': 'Fear because the police are involved. '}, {'emotion': 'Fear', 'intensity': '2', 'reason': 'I worry about the underprivileged people living in this area and what could happen to them'}, {'emotion': 'Sadness', 'intensity': '5', 'reason': 'I feel afraid of the people that use guns to harm peopl…	[{'emotion': 'Fear', 'intensity': '3', 'reason': 'The cordon and police cars make people nervous and scared.', 'url': 'anonymous-source/all_shooting_images_newest/313.jpg'}, {'emotion': 'Contentment', 'intensity': '3', 'reason': 'this is a good trend.', 'url': 'anonymous-source/all_shooting_images_newest/313.jpg'}, {'emotion': 'Sadness', 'intensity': '3', 'reason': 'It is sad that people have to …
38	Pro-gun Georgia lawmakers punish Delta for crossing the NRA	anonymous-source/all_shooting_images_newest/10722.jpg	[{'emotion': 'Sadness', 'intensity': '1', 'reason': "I don't know what happened."}, {'emotion': 'Fear', 'intensity': '3', 'reason': "I don't understand "}, {'emotion': 'Awe', 'intensity': '3', 'reason': 'Delta crossed the NRA?'}, {'emotion': 'Amusement', 'intensity': '3', 'reason': 'I like it'}, {'emotion': 'Disgust', 'intensity': '4', 'reason': "pro-gun individuals should not be upset about not …	[{'emotion': 'Anger', 'intensity': '3', 'reason': 'Anger'}, {'emotion': 'Anger', 'intensity': '3', 'reason': 'Pro-gun lawmakers should not be punishing delta.'}, {'emotion': 'Amusement', 'intensity': '3', 'reason': "I think it's somewhat funny that the Pro-gun lawmakers were no happy with this."}, {'emotion': 'Anger', 'intensity': '4', 'reason': 'I feel anger at people that use their influence to…	[{'emotion': 'Fear', 'intensity': '3', 'reason': "The focus of the picture seems to be the planes and airlines, which doesn't make me feel anything.", 'url': 'anonymous-source/all_shooting_images_newest/10722.jpg'}, {'emotion': 'Amusement', 'intensity': '3', 'reason': 'everyone should support better gun control.', 'url': 'anonymous-source/all_shooting_images_newest/10722.jpg'}, {'emotion': 'Conte…
39	Township objects to proposed new rules for Kendall County shooting ranges	anonymous-source/all_shooting_images_newest/100165.jpg	[{'emotion': 'Anger', 'intensity': '3', 'reason': 'They should propose new rules.'}, {'emotion': 'Fear', 'intensity': '3', 'reason': 'I wonder how they decide '}, {'emotion': 'Excitement', 'intensity': '3', 'reason': 'excited to see what will happen'}, {'emotion': 'Excitement', 'intensity': '3', 'reason': 'I like it'}, {'emotion': 'Disgust', 'intensity': '3', 'reason': 'why object new rules for s…	[{'emotion': 'Contentment', 'intensity': '3', 'reason': 'Contentment\r\n'}, {'emotion': 'Fear', 'intensity': '3', 'reason': 'I hope they are fighting for gun safety but I fear they are not.'}, {'emotion': 'Contentment', 'intensity': '1', 'reason': 'I do not know the context of the image'}, {'emotion': 'Sadness', 'intensity': '4', 'reason': 'I feel sad about people that do not take gun violence se…	[{'emotion': 'Sadness', 'intensity': '3', 'reason': 'People seemed to be discussing hard choices, which made me nervous and scared about the end result.', 'url': 'anonymous-source/all_shooting_images_newest/100165.jpg'}, {'emotion': 'Fear', 'intensity': '3', 'reason': "If the new rules can contribute to people's safety, people should accept it.", 'url': 'anonymous-source/all_shooting_images_newes…
40	Who is Robert Bowers? Accused Pittsburgh synagogue shooter left anti-semitic trail	anonymous-source/all_shooting_images_newest/100500.jpg	[{'emotion': 'Disgust', 'intensity': '4', 'reason': 'this man is such a vile human and what he did is so tragic'}, {'emotion': 'Fear', 'intensity': '3', 'reason': 'there are so many people out there with the intent to hurt those who are different.'}, {'emotion': 'Fear', 'intensity': '3', 'reason': 'The fact that someone get away with shooting people makes me feel that the punishment of misusing w…	[{'emotion': 'Fear', 'intensity': '2', 'reason': 'Given the context of gun violence, it can be assumed the person above was prosecuted for gun violence of some sort'}, {'emotion': 'Fear', 'intensity': '2', 'reason': 'the man/mugshot looks intimidating and he reminds me of John Wayne Gacy Jr.'}, {'emotion': 'Disgust', 'intensity': '3', 'reason': 'the person is a criminal that has committed atrocit…	[{'emotion': 'Disgust', 'intensity': '4', 'reason': "Not sure if they meant trial, but if so it's another white man who got away with murder and was not held accountable.", 'url': 'anonymous-source/all_shooting_images_newest/100500.jpg'}, {'emotion': 'Amusement', 'intensity': '2', 'reason': "His face just sticks out to me and the ways his eyes just stare into my soul makes me feel really self con…
41	A Black Security Guard Was Killed By Police As He Tried To Stop A Shooting	anonymous-source/all_shooting_images_newest/110335.jpg	[{'emotion': 'Anger', 'intensity': '4', 'reason': 'the police killed an innocent man for no reason'}, {'emotion': 'Disgust', 'intensity': '5', 'reason': 'that is an absolutely disgusting scenario–that someone trying to safe lives gets theirs taken because of prejudices among the police.'}, {'emotion': 'Sadness', 'intensity': '4', 'reason': 'I feel like it a racist issue '}, {'emotion': 'Disgust',…	[{'emotion': 'Contentment', 'intensity': '1', 'reason': 'Not sure how this relates to gun violence, I just see a selfie'}, {'emotion': 'Sadness', 'intensity': '2', 'reason': 'the man here seems to be a victim.'}, {'emotion': 'Sadness', 'intensity': '3', 'reason': 'I assume that he is a victim of police gun violence'}, {'emotion': 'Fear', 'intensity': '4', 'reason': 'because it reminds me of the p…	[{'emotion': 'Anger', 'intensity': '5', 'reason': "It's frustrating see another black man getting shot by the police when he did nothing wrong. ", 'url': 'anonymous-source/all_shooting_images_newest/110335.jpg'}, {'emotion': 'Sadness', 'intensity': '3', 'reason': "It's sad to see heroes die. If the caption is true then this man died saving someone's life. It's just a tragedy, and I think sometime…
42	Interior Secretary Ryan Zinke Held Onto Undisclosed Shares In Gun Company	anonymous-source/all_shooting_images_newest/10741.jpg	[{'emotion': 'Contentment', 'intensity': '1', 'reason': 'there is not enough info in the headline to make a informed conclusion'}, {'emotion': 'Anger', 'intensity': '3', 'reason': 'At that rate, gun reform will never happen.'}, {'emotion': 'Amusement', 'intensity': '1', 'reason': 'I do not really care about it that much'}, {'emotion': 'Sadness', 'intensity': '4', 'reason': 'that is wrong'}, {'emo…	[{'emotion': 'Contentment', 'intensity': '1', 'reason': 'the president is just coming out of a plane, I see no relation to gun violence in this image '}, {'emotion': 'Anger', 'intensity': '1', 'reason': 'the man seems to be for gun rights. I associate people who are for gun rights to be unmindful of the violence it causes.'}, {'emotion': 'Disgust', 'intensity': '3', 'reason': "i assume he's pro-g…	[{'emotion': 'Anger', 'intensity': '4', 'reason': 'Its frustrating to see people in power secretly supporting gun companies when there is a crisis that is happening in the country.', 'url': 'anonymous-source/all_shooting_images_newest/10741.jpg'}, {'emotion': 'Disgust', 'intensity': '1', 'reason': "It's a man who is clearly very privileged delivering a speech. I know he's already plotting somethi…
43	Trump Made False Claims About 9/11 to Justify Hosting a Rally After the Synagogue Shooting	anonymous-source/all_shooting_images_newest/100082.jpg	[{'emotion': 'Disgust', 'intensity': '4', 'reason': 'trump is a disgusting human to justify his actions'}, {'emotion': 'Disgust', 'intensity': '4', 'reason': 'it is never okay to make false claims to serve your own agenda'}, {'emotion': 'Amusement', 'intensity': '3', 'reason': 'I think its funny that president of United States would do something like that'}, {'emotion': 'Sadness', 'intensity': '3…	[{'emotion': 'Disgust', 'intensity': '3', 'reason': 'Trump is so ignorant to many issues in the country, especially gun violence, and it shows in this picture'}, {'emotion': 'Disgust', 'intensity': '4', 'reason': 'Trump has so much power and influence and I feel like he uses it against the good of the people.'}, {'emotion': 'Disgust', 'intensity': '5', 'reason': "he's simply an atrocious man who …	[{'emotion': 'Disgust', 'intensity': '5', 'reason': 'Trump takes shootings so lightly and he is clearly extremely selfish because all he cares about is himself and his rallies to support him.', 'url': 'anonymous-source/all_shooting_images_newest/100082.jpg'}, {'emotion': 'Sadness', 'intensity': '4', 'reason': "Trump has just done a lot of questionable things and he's definitely not been shown in …
44	Judge blocks distribution of 3D-printed gun blueprints until case is resolved	anonymous-source/all_shooting_images_newest/128.jpg	[{'emotion': 'Contentment', 'intensity': '2', 'reason': 'for now i am content but intriguied to see the next steps'}, {'emotion': 'Contentment', 'intensity': '3', 'reason': 'the distribution of 3D-printed gun blueprints should not happen.'}, {'emotion': 'Contentment', 'intensity': '3', 'reason': 'I think the judge did a right thing'}, {'emotion': 'Contentment', 'intensity': '4', 'reason': 'that i…	[{'emotion': 'Fear', 'intensity': '4', 'reason': 'Looks like a 3D printed gun. With that new technology, it will be easier to make guns, even if they cannot do much damage they still have the potential to hurt people '}, {'emotion': 'Contentment', 'intensity': '1', 'reason': "I feel like the next best thing if gun rights cannot be changed, is better training and protocols put in place to make sur…	[{'emotion': 'Contentment', 'intensity': '4', 'reason': 'This makes me happy because for once someone is taking responsibility in gun control and taking the measures needed to keep people safe.', 'url': 'anonymous-source/all_shooting_images_newest/128.jpg'}, {'emotion': 'Amusement', 'intensity': '4', 'reason': "Printing guns, that's just crazy to me to see how the world has evolved. It's a cool t…
45	'Stay in your lane': Doctors fire back at the NRA over guns	anonymous-source/all_shooting_images_newest/110065.jpg	[{'emotion': 'Awe', 'intensity': '2', 'reason': 'the doctors stood their ground and spoke the truth'}, {'emotion': 'Amusement', 'intensity': '3', 'reason': 'I agree with the Doctor'}, {'emotion': 'Awe', 'intensity': '3', 'reason': 'I think its unbelievable that some would say something like that especially a doctor'}, {'emotion': 'Contentment', 'intensity': '3', 'reason': 'the title is vague'}, {…	[{'emotion': 'Fear', 'intensity': '3', 'reason': 'I am confused as to why gun stores have to sell weapons of mass destruction. An AK47 is much different than a handgun. Why do people need such big guns?'}, {'emotion': 'Fear', 'intensity': '1', 'reason': "I've been inside a store that sells rifles for hunting. The gun on the counter makes me feel especially scared because of the color and size. it…	[{'emotion': 'Contentment', 'intensity': '4', 'reason': 'Not sure what the context was for the doctors saying stay in your lane, but if it was to stop selling guns it makes me happy to see people stand up for what is right.', 'url': 'anonymous-source/all_shooting_images_newest/110065.jpg'}, {'emotion': 'Awe', 'intensity': '4', 'reason': "Stay in your lane is so direct and almost confrontational a…
46	Firearms, violence and hate crimes are public health issues we must address immediately | TheHill	anonymous-source/all_shooting_images_newest/110481.jpg	[{'emotion': 'Excitement', 'intensity': '4', 'reason': 'this issue is well overdone and needs to be addressed'}, {'emotion': 'Sadness', 'intensity': '3', 'reason': "It's tragic that it is the case, but I do agree."}, {'emotion': 'Excitement', 'intensity': '3', 'reason': 'Because I feel like its the right thing to do.'}, {'emotion': 'Contentment', 'intensity': '4', 'reason': 'these are issues we n…	[{'emotion': 'Sadness', 'intensity': '4', 'reason': 'Seeing people need to protest for gun control makes me sad because it should not even be in question. It motivates me to protest with them'}, {'emotion': 'Contentment', 'intensity': '3', 'reason': 'the demonstrators are upholding a belief similar to my own.'}, {'emotion': 'Contentment', 'intensity': '4', 'reason': 'i agree with gun reform'}, {'…	[{'emotion': 'Contentment', 'intensity': '4', 'reason': 'I agree with this statement and it makes me happy to see a major newspaper bring this issue to light\r\n', 'url': 'anonymous-source/all_shooting_images_newest/110481.jpg'}, {'emotion': 'Contentment', 'intensity': '2', 'reason': "It's good that people are protesting and that these activists are trying to achieve positive change.", 'url': 'an…
47	Police say Jacksonville shooter 'clearly targeted other gamers.' Here's what we know	anonymous-source/all_shooting_images_newest/386.jpg	[{'emotion': 'Sadness', 'intensity': '2', 'reason': 'this shooter was clearly disturbed and never should have had a gun'}, {'emotion': 'Sadness', 'intensity': '3', 'reason': 'it is sad to see more lives lost to shootings'}, {'emotion': 'Fear', 'intensity': '3', 'reason': 'It feels horrible knowing that someone are secretly plotting things like this'}, {'emotion': 'Disgust', 'intensity': '5', 'rea…	[{'emotion': 'Fear', 'intensity': '3', 'reason': 'this photo demonstrates gun violence is everywhere. It looks like a local bar but with the context of gun violence, something happened'}, {'emotion': 'Sadness', 'intensity': '2', 'reason': "overtime these images only make me feel sad. I don't get angry because I feel like anger would only cause more divide and more issues."}, {'emotion': 'Sadness'…	[{'emotion': 'Disgust', 'intensity': '4', 'reason': 'Seeing someone specifically target a group of people in a shooting just shows they had a clear motive.', 'url': 'anonymous-source/all_shooting_images_newest/386.jpg'}, {'emotion': 'Fear', 'intensity': '2', 'reason': 'Shootings are just scary and I wonder what would happen if I was in that situation, it just makes me feel unsafe.', 'url': 'anony…
48	Bank of America to Stop Financing Makers of Military-Style Guns	anonymous-source/all_shooting_images_newest/10755.jpg	[{'emotion': 'Contentment', 'intensity': '2', 'reason': 'that is their decision to make'}, {'emotion': 'Contentment', 'intensity': '4', 'reason': 'I support the defunding of Military-Style Guns'}, {'emotion': 'Contentment', 'intensity': '3', 'reason': 'I feel like they are doing the right thing'}, {'emotion': 'Contentment', 'intensity': '3', 'reason': 'it confuses me when big corporations get pol…	[{'emotion': 'Fear', 'intensity': '2', 'reason': 'Seems like somewhere you could be held at gun point if no one was around'}, {'emotion': 'Fear', 'intensity': '3', 'reason': 'the image looks sketchy. I would do my best to not put myself in a potentially dangerous situation, like using an ATM at night.'}, {'emotion': 'Disgust', 'intensity': '3', 'reason': 'i imagine a robbery which is upsetting'},…	[{'emotion': 'Contentment', 'intensity': '4', 'reason': "it's nice to see such a big corporation taking responsibility in not supporting big military companies that sell guns.", 'url': 'anonymous-source/all_shooting_images_newest/10755.jpg'}, {'emotion': 'Sadness', 'intensity': '4', 'reason': 'Why would Bank of America do such things like that. Guns are dangerous and they need too top putting mon…
49	This Is Us' mourns Pittsburgh synagogue shooting victims in powerful message	anonymous-source/all_shooting_images_newest/100168.jpg	[{'emotion': 'Contentment', 'intensity': '2', 'reason': "while the eventis sad this is us had nothing to do with the issue and I've never seen the show so them mourning means nothing"}, {'emotion': 'Sadness', 'intensity': '3', 'reason': "it's sad to think about the victims of mass shootings"}, {'emotion': 'Contentment', 'intensity': '3', 'reason': 'I think its a great event and it a meaningful th…	[{'emotion': 'Contentment', 'intensity': '2', 'reason': 'not sure how this relates to gun violence. Seems like a family with an adopted son. Maybe the son lost his parents to gun violence? In that case I would feel very sad and angry'}, {'emotion': 'Fear', 'intensity': '1', 'reason': "I don't know who that family is or how to feel."}, {'emotion': 'Anger', 'intensity': '1', 'reason': 'i get white …	[{'emotion': 'Sadness', 'intensity': '4', 'reason': 'It sad to see a happy family in headlines of a shooting.', 'url': 'anonymous-source/all_shooting_images_newest/100168.jpg'}, {'emotion': 'Sadness', 'intensity': '5', 'reason': "What a beautiful family, and it's just sad to see them be gone. It's tragic and just absolutely disappointing for me to hear and see. They could have had such a bright a…
50	Orlando nightclub gunman remembered as abusive, homophobic and racist	anonymous-source/all_shooting_images_newest/110070.jpg	[{'emotion': 'Disgust', 'intensity': '4', 'reason': 'the shooter should have never had a gun in the first place'}, {'emotion': 'Disgust', 'intensity': '3', 'reason': 'someone being that hateful is atrocious'}, {'emotion': 'Amusement', 'intensity': '3', 'reason': 'I do not care about it that much'}, {'emotion': 'Sadness', 'intensity': '3', 'reason': 'clearly he was an awful person'}, {'emotion': '…	[{'emotion': 'Fear', 'intensity': '3', 'reason': 'Given the context of gun violence, this guy seems suspicious '}, {'emotion': 'Fear', 'intensity': '3', 'reason': "the man's look seems intimidating. I also never feel comfortable about selfies in a car because of similar stories of people taking their last photo/video before committing a heinous act."}, {'emotion': 'Disgust', 'intensity': '1', 're…	[{'emotion': 'Anger', 'intensity': '4', 'reason': 'Its terrible to see the shooter and think of how many people he killed.', 'url': 'anonymous-source/all_shooting_images_newest/110070.jpg'}, {'emotion': 'Sadness', 'intensity': '2', 'reason': "How could someone fall so low and be so pushed to such a lowly point. I'm not even angry, just sad, and I want him to be understood, to speak to him, to wha…
51	After He Subdued a Shooting Suspect, an Armed, Black Security Guard Is Killed by Responding Police	anonymous-source/all_shooting_images_newest/110361.jpg	[{'emotion': 'Anger', 'intensity': '3', 'reason': 'yet again the police kill an innocent person'}, {'emotion': 'Disgust', 'intensity': '4', 'reason': 'absolutely appalled at how this could happen.'}, {'emotion': 'Anger', 'intensity': '3', 'reason': 'I think the police I controlled by the stereotype. Also I think its a racist issue'}, {'emotion': 'Anger', 'intensity': '4', 'reason': 'that should n…	[{'emotion': 'Contentment', 'intensity': '2', 'reason': 'Not sure how this relates to gun violence, I just see a selfie'}, {'emotion': 'Sadness', 'intensity': '2', 'reason': "this seems to be the photo of a victim. I think that because the photo seems older and has a personality (he's at a piano so maybe he plays piano)."}, {'emotion': 'Sadness', 'intensity': '3', 'reason': 'i assume this is a vi…	[{'emotion': 'Anger', 'intensity': '5', 'reason': 'Police brutality is such a pressing issue in the country and there are so many cases of innocent lives being lost yet nothing is being done about it.', 'url': 'anonymous-source/all_shooting_images_newest/110361.jpg'}, {'emotion': 'Sadness', 'intensity': '2', 'reason': "It's so depressing to see miscommunciation creating unnecessary violence. Just…
52	Trump s Stance on Guns Puts Pressure on Congress	anonymous-source/all_shooting_images_newest/10759.jpg	[{'emotion': 'Anger', 'intensity': '2', 'reason': 'everything trump does is absolutley vile'}, {'emotion': 'Anger', 'intensity': '3', 'reason': 'anytime Trump is mentioned makes me angry'}, {'emotion': 'Amusement', 'intensity': '3', 'reason': "I don't really take Trump's behavior seriously because he is always doing things that are hard for people to understand"}, {'emotion': 'Contentment', 'inte…	[{'emotion': 'Disgust', 'intensity': '3', 'reason': "Trump is so ignorant to many issues in the country, especially gun violence, I can't imagine what he is trying to say here. Probably something offensive or not helpful"}, {'emotion': 'Disgust', 'intensity': '3', 'reason': "the girl in the image doesn't seem to be expressing a positive emotion. She seems uncomfortable so I feel uncomfortable."},…	[{'emotion': 'Disgust', 'intensity': '4', 'reason': 'His stance on guns is to do nothing about it and as a person who has so much power it is concerning.', 'url': 'anonymous-source/all_shooting_images_newest/10759.jpg'}, {'emotion': 'Fear', 'intensity': '2', 'reason': 'Whenever Trump is putting pressure on anything, it just ', 'url': 'anonymous-source/all_shooting_images_newest/10759.jpg'}, {'emo…
53	Dem lawmaker 'sickened' that Pa. school district will let teachers carry guns	anonymous-source/all_shooting_images_newest/100085.jpg	[{'emotion': 'Fear', 'intensity': '2', 'reason': 'if a teacher has a mental break then they could possibly do something horrible'}, {'emotion': 'Contentment', 'intensity': '3', 'reason': 'I absolutely agree'}, {'emotion': 'Awe', 'intensity': '3', 'reason': 'I and shocked that they let teachers carry guns'}, {'emotion': 'Sadness', 'intensity': '3', 'reason': "I don't know where I stand on this pol…	[{'emotion': 'Contentment', 'intensity': '1', 'reason': 'I do not know who this is so I am not sure how to relate it to gun violence '}, {'emotion': 'Disgust', 'intensity': '2', 'reason': "I don't like the way he's smiling. It seems like he knows something that I don't. He also seems privileged and that makes me feel a little bit disgusted."}, {'emotion': 'Disgust', 'intensity': '1', 'reason': "i…	[{'emotion': 'Contentment', 'intensity': '4', 'reason': 'It is refreshing to see that someone has empathy.', 'url': 'anonymous-source/all_shooting_images_newest/100085.jpg'}, {'emotion': 'Anger', 'intensity': '4', 'reason': "Imagine having my own teachers in my old high school carrying guns to school. It just seems like a whole other world. what is this turning into. Is everyone gonna just be car…
54	Where do young Americans stand on guns?	anonymous-source/all_shooting_images_newest/157.jpg	[{'emotion': 'Contentment', 'intensity': '3', 'reason': 'there isnt much info in the title, would need to read the article'}, {'emotion': 'Fear', 'intensity': '3', 'reason': "I'm afraid of how many people are in support of guns"}, {'emotion': 'Amusement', 'intensity': '3', 'reason': 'I do not really care because similar questions are talked about again and again over the past decades'}, {'emotion…	[{'emotion': 'Fear', 'intensity': '3', 'reason': 'Looks like a 3D printed guns. With that new technology, it will be easier to make guns, even if they cannot do much damage they still have the potential to hurt people '}, {'emotion': 'Disgust', 'intensity': '2', 'reason': 'the training tools for firearm handling seem obsolete. I now feel like we should stop training people how to use guns and tak…	[{'emotion': 'Fear', 'intensity': '4', 'reason': 'I am scared to see the results because I do not have hope it will be a good stance.', 'url': 'anonymous-source/all_shooting_images_newest/157.jpg'}, {'emotion': 'Amusement', 'intensity': '4', 'reason': 'I am curious as to how do young people feel about guns, like I personally want to know. Also the shapes of the toy guns or replicas is just amusin…
55	California Is Already Tough on Guns. After a Mass Shooting, Some Wonder if It s Enough	anonymous-source/all_shooting_images_newest/110229.jpg	[{'emotion': 'Sadness', 'intensity': '2', 'reason': 'even with tough gun restrictions there was still a mass shooting'}, {'emotion': 'Fear', 'intensity': '3', 'reason': 'that there are continued shootings even with stricter laws. '}, {'emotion': 'Contentment', 'intensity': '3', 'reason': 'I feel like it\'s a good "wonder" because we can never be too careful when it comes to gun control'}, {'emoti…	[{'emotion': 'Contentment', 'intensity': '1', 'reason': 'These look like hunting guns, I do not feel strongly around this image. I guess any gun is dangerous though'}, {'emotion': 'Disgust', 'intensity': '1', 'reason': "there are so many guns for sale out in the world and I don't feel like it should be something everyone has, especially if they don't hunt."}, {'emotion': 'Disgust', 'intensity': '…	[{'emotion': 'Contentment', 'intensity': '4', 'reason': 'I agree that gun laws should be even stricter than they already are.', 'url': 'anonymous-source/all_shooting_images_newest/110229.jpg'}, {'emotion': 'Contentment', 'intensity': '2', 'reason': "It's good that these issues are being brought up, and that the safety and well being of people are being valued. It's so easy to ignore guns and say …
56	Police change explanation again after killing black man they mistook for an active shooter	anonymous-source/all_shooting_images_newest/110502.jpg	[{'emotion': 'Disgust', 'intensity': '4', 'reason': 'why do cops continualy kill innocent people'}, {'emotion': 'Disgust', 'intensity': '4', 'reason': 'there is no excuse'}, {'emotion': 'Anger', 'intensity': '3', 'reason': "I feel like police aren't feeling regret after multiple events like that happened"}, {'emotion': 'Disgust', 'intensity': '5', 'reason': 'this should never happen'}, {'emotion'…	[{'emotion': 'Anger', 'intensity': '5', 'reason': 'there needs to be justice for the families who have lost loved ones to gun violence. Justice looks like gun control.'}, {'emotion': 'Awe', 'intensity': '4', 'reason': 'any sort of activism that falls in line with my personal values makes me proud. These people have faced an injustice and are doing something about it.'}, {'emotion': 'Sadness', 'in…	[{'emotion': 'Anger', 'intensity': '5', 'reason': 'Police brutality in the country is such a large issue and it seems like the same instances are occurring over and over again with no change being made.', 'url': 'anonymous-source/all_shooting_images_newest/110502.jpg'}, {'emotion': 'Anger', 'intensity': '5', 'reason': "Why, how, and who could do this. It's a police officer's job to protect the pe…
57	3 drivers say man charged in 'stand your ground' shooting death threatened them	anonymous-source/all_shooting_images_newest/391.jpg	[{'emotion': 'Sadness', 'intensity': '2', 'reason': 'this man clearly had some mental issues that he needed to work out'}, {'emotion': 'Fear', 'intensity': '3', 'reason': 'this is a common occurance'}, {'emotion': 'Amusement', 'intensity': '1', 'reason': "I feel like it's just like someone get robbed"}, {'emotion': 'Fear', 'intensity': '5', 'reason': "it's scary"}, {'emotion': 'Sadness', 'intensi…	[{'emotion': 'Fear', 'intensity': '5', 'reason': 'it looks like the man on the ground is begging for his life which is scary because it demonstrates the lack of empathy the shooter has (given the context of gun violence) '}, {'emotion': 'Fear', 'intensity': '4', 'reason': "I don't know the full context of what is going on but the elements in the photo make me scared (someone fleeing, someone on t…	[{'emotion': 'Sadness', 'intensity': '4', 'reason': "It's so sad to see so many shooting happening around the country and innocent lives being lost because gun laws are not tighter.", 'url': 'anonymous-source/all_shooting_images_newest/391.jpg'}, {'emotion': 'Fear', 'intensity': '4', 'reason': "this could happen to any one at any time. Isn't that just crazy and scary. Am I ever safe? What do I do…
58	Delta, now entangled in controversy, says it sold just 13 tickets under NRA discount	anonymous-source/all_shooting_images_newest/10806.jpg	[{'emotion': 'Contentment', 'intensity': '2', 'reason': 'i dont really understand the story and would need to read the whole article'}, {'emotion': 'Anger', 'intensity': '3', 'reason': 'why would they have an NRA discount? Ridiculous.'}, {'emotion': 'Disgust', 'intensity': '3', 'reason': 'I feel disgusted when thinking about someone is make money off of those things.\r\n'}, {'emotion': 'Contentme…	[{'emotion': 'Contentment', 'intensity': '1', 'reason': 'not sure how this relates to gun violence. If anything, I associate the airport with bombs not guns '}, {'emotion': 'Disgust', 'intensity': '4', 'reason': "I don't think people should fly or travel with firearms."}, {'emotion': 'Fear', 'intensity': '3', 'reason': 'i cant imagine being in a shooter situation on a plane'}, {'emotion': 'Excite…	[{'emotion': 'Disgust', 'intensity': '4', 'reason': 'I fly with Delta a lot and it is making me reconsider supporting them because I did not know they supported the NRA.', 'url': 'anonymous-source/all_shooting_images_newest/10806.jpg'}, {'emotion': 'Awe', 'intensity': '3', 'reason': "I don't know what the NRA is, but I'm going to assume that it's a gun company. And I'm confused 13 tickets of what…
59	Mad Magazine s ABCs of a School Shooting Give It a Boost of Relevance	anonymous-source/all_shooting_images_newest/100172.jpg	[{'emotion': 'Sadness', 'intensity': '3', 'reason': 'the fact that they can have and ABC of a school shooting is sad'}, {'emotion': 'Sadness', 'intensity': '3', 'reason': 'seeing how shootings are engrained into our culture'}, {'emotion': 'Awe', 'intensity': '2', 'reason': 'when it comes about school shooting, I always feel horrible and angry'}, {'emotion': 'Sadness', 'intensity': '4', 'reason': …	[{'emotion': 'Disgust', 'intensity': '5', 'reason': 'it is just awful what Edward Gorey did. It disgusts me that someone would do such a thing'}, {'emotion': 'Amusement', 'intensity': '1', 'reason': "I'm familiar with M.A.D. (the little face in the top left). They produce satire. Even though the thoughts that this piece provokes are haunting and uncomfortable, it's not meant to be entirely fun. I…	[{'emotion': 'Anger', 'intensity': '5', 'reason': 'Kids should not be exposed to this kind of material at such a young age especially with the political climate at the moment with many of them showing up to schools with guns.', 'url': 'anonymous-source/all_shooting_images_newest/100172.jpg'}, {'emotion': 'Disgust', 'intensity': '4', 'reason': "I have not seen the performance / story, so I'm feeli…
60	Vernon Hills teen accused of wearing white supremacist shirt pleads not guilty to weapons charges	anonymous-source/all_shooting_images_newest/10107.jpg	[{'emotion': 'Excitement', 'intensity': '1', 'reason': 'not sure what happened '}, {'emotion': 'Fear', 'intensity': '3', 'reason': 'personal attack makes me angry and fear.'}, {'emotion': 'Sadness', 'intensity': '3', 'reason': 'Teenagers have access to gun, which may lead them to do something extreme as they are not mentally mature.'}, {'emotion': 'Amusement', 'intensity': '3', 'reason': 'I do no…	[{'emotion': 'Amusement', 'intensity': '2', 'reason': 'sad'}, {'emotion': 'Fear', 'intensity': '3', 'reason': "Do not understand if this person's a victim or perpetrator"}, {'emotion': 'Sadness', 'intensity': '3', 'reason': 'though not like a criminal at his face, I think the pic shows he did smth bad'}, {'emotion': 'Disgust', 'intensity': '5', 'reason': "I'll never understand the concept of whit…	[{'emotion': 'Anger', 'intensity': '3', 'reason': 'gun shooting is such a bad thing that everyone who related to a gun issue should not be regarded as not guilty. Also, in this case, it include racism.', 'url': 'anonymous-source/all_shooting_images_newest/10107.jpg'}, {'emotion': 'Sadness', 'intensity': '3', 'reason': "I think this person's school should take some responsibility for this. Maybe m…
61	He Created 3D-Printed Guns And Funded Neo-Nazis. Now He's An International Fugitive.	anonymous-source/all_shooting_images_newest/90054.jpg	[{'emotion': 'Excitement', 'intensity': '3', 'reason': 'people like him should be arrested '}, {'emotion': 'Excitement', 'intensity': '4', 'reason': 'it met my expectation'}, {'emotion': 'Contentment', 'intensity': '3', 'reason': "there's always somebody with gun that can be a threat to the society. but thankfully he's an international fugitive now"}, {'emotion': 'Fear', 'intensity': '3', 'reason…	[{'emotion': 'Amusement', 'intensity': '4', 'reason': 'sad'}, {'emotion': 'Anger', 'intensity': '3', 'reason': 'gun control is a huge problem in the United States and easy access to ammunition just adds to this problem'}, {'emotion': 'Fear', 'intensity': '3', 'reason': 'sales like this may lead to gun abuse'}, {'emotion': 'Fear', 'intensity': '5', 'reason': "As if it wasn't easy enough to get a g…	[{'emotion': 'Sadness', 'intensity': '3', 'reason': 'why these people who have received high level of education do not devote themselves that are good for the citizens and the country?', 'url': 'anonymous-source/all_shooting_images_newest/90054.jpg'}, {'emotion': 'Disgust', 'intensity': '3', 'reason': 'I think it is angry and disgusting that capable people do not use their abilities to build a be…
62	First immigration, then guns, now tariffs: Policy chaos defines Trump's White House	anonymous-source/all_shooting_images_newest/10236.jpg	[{'emotion': 'Sadness', 'intensity': '3', 'reason': "exact the same feeling of Trump's policy "}, {'emotion': 'Excitement', 'intensity': '2', 'reason': 'It met my expectation.'}, {'emotion': 'Anger', 'intensity': '3', 'reason': "Trump hasn't made any contributions to the country or the world"}, {'emotion': 'Fear', 'intensity': '3', 'reason': 'I do not like it '}, {'emotion': 'Disgust', 'intensity…	[{'emotion': 'Amusement', 'intensity': '2', 'reason': 'sad'}, {'emotion': 'Disgust', 'intensity': '3', 'reason': 'Donald Trump mostly gives out controversial statements, so in terms of Gun Violence it is expected that he would say something conservative '}, {'emotion': 'Amusement', 'intensity': '3', 'reason': 'seems that Trump dosent have good ideas so just spread his hands like that'}, {'emotion…	[{'emotion': 'Disgust', 'intensity': '3', 'reason': 'he need deftly pay more attention to the safety of citizens that currently live in the U.S. first.', 'url': 'anonymous-source/all_shooting_images_newest/10236.jpg'}, {'emotion': 'Anger', 'intensity': '3', 'reason': "The greatest responsibility of the government and the president is to think for the country's peace, but these three things show t…
63	Trump's school safety commission would prefer if you didn't talk about gun control	anonymous-source/all_shooting_images_newest/278.jpg	[{'emotion': 'Excitement', 'intensity': '1', 'reason': 'not sure what happened '}, {'emotion': 'Anger', 'intensity': '4', 'reason': "don't talk about it doesn't means it's not an issue."}, {'emotion': 'Anger', 'intensity': '3', 'reason': 'this cannot solve the problem from the source'}, {'emotion': 'Fear', 'intensity': '3', 'reason': 'I do not like it '}, {'emotion': 'Anger', 'intensity': '5', 'r…	[{'emotion': 'Amusement', 'intensity': '2', 'reason': 'sad'}, {'emotion': 'Amusement', 'intensity': '3', 'reason': 'because it makes me wonder if something monumental is being discussed over gun control and gun violence'}, {'emotion': 'Awe', 'intensity': '3', 'reason': 'hope that they can reach an agreement and put forward good laws and practices'}, {'emotion': 'Fear', 'intensity': '3', 'reason':…	[{'emotion': 'Anger', 'intensity': '3', 'reason': 'we need to mention gun control in everywhere especially in the schools, since there are a lot of young students there.', 'url': 'anonymous-source/all_shooting_images_newest/278.jpg'}, {'emotion': 'Amusement', 'intensity': '3', 'reason': "I think it's ridiculous not to reflect on the bad things that have happened.", 'url': 'anonymous-source/all_sh…
64	Pittsburgh shooting: Trump says synagogue attack has little to do with gun laws	anonymous-source/all_shooting_images_newest/100272.jpg	[{'emotion': 'Sadness', 'intensity': '3', 'reason': 'not quite believe it '}, {'emotion': 'Disgust', 'intensity': '5', 'reason': 'It has everything to do with gun laws.'}, {'emotion': 'Disgust', 'intensity': '5', 'reason': 'sure it doesnt '}, {'emotion': 'Anger', 'intensity': '3', 'reason': "trump speaks out of his ass and doesn't make sense"}, {'emotion': 'Anger', 'intensity': '5', 'reason': "Th…	[{'emotion': 'Anger', 'intensity': '3', 'reason': 'I feel like Trump was on the news too much and that made other people riled up.'}, {'emotion': 'Disgust', 'intensity': '5', 'reason': 'Again, just a terrible man who should have never gotten to the position he did. '}, {'emotion': 'Anger', 'intensity': '3', 'reason': "trump looks nonchalant about anything that he's talking about"}, {'emotion': 'D…	[{'emotion': 'Anger', 'intensity': '4', 'reason': "Once again, by denying that it has nothing to do with gun laws, it's only going to further people's protectiveness towards the gun laws, and thus make the future of gun safety and violence hard to handle in the future for America. If the direct issue regarding the mass shooting is not addressed, then there will only be a hopeless future for the y…
65	3D Printing Vs Gun Control: Navigating The Paradox Analysis	anonymous-source/all_shooting_images_newest/90478.jpg	[{'emotion': 'Excitement', 'intensity': '1', 'reason': 'actually not familiar with the topic '}, {'emotion': 'Fear', 'intensity': '2', 'reason': 'can 3D printers make guns?'}, {'emotion': 'Contentment', 'intensity': '3', 'reason': "it's important to keep the gun control and at the same time give developing space for technology"}, {'emotion': 'Excitement', 'intensity': '3', 'reason': 'I do like it…	[{'emotion': 'Amusement', 'intensity': '2', 'reason': 'sad'}, {'emotion': 'Fear', 'intensity': '3', 'reason': 'I would want to know the context in which guns are being mentioned. We, as citizens should be aware of gun violence related happenings around us. '}, {'emotion': 'Disgust', 'intensity': '3', 'reason': 'so straightforward lol. just think it should be somehow limited'}, {'emotion': 'Fear',…	[{'emotion': 'Excitement', 'intensity': '3', 'reason': 'I am curious about the result about the paradox.', 'url': 'anonymous-source/all_shooting_images_newest/90478.jpg'}, {'emotion': 'Contentment', 'intensity': '3', 'reason': "this kind of analysis would be helpful for people's understanding.", 'url': 'anonymous-source/all_shooting_images_newest/90478.jpg'}, {'emotion': 'Excitement', 'intensity'…
66	March for Our Rights rally draws thousands of pro-gun supporters in Washington state	anonymous-source/all_shooting_images_newest/10366.jpg	[{'emotion': 'Excitement', 'intensity': '1', 'reason': 'actually not familiar with the topic '}, {'emotion': 'Fear', 'intensity': '4', 'reason': 'Fear of the shooting might happen'}, {'emotion': 'Excitement', 'intensity': '3', 'reason': 'most people are rational and want to stand out to fight for peaceful and safe life'}, {'emotion': 'Fear', 'intensity': '3', 'reason': 'I do not like it '}, {'emo…	[{'emotion': 'Awe', 'intensity': '4', 'reason': 'sad'}, {'emotion': 'Sadness', 'intensity': '4', 'reason': 'It is really disturbing to see anyone with a gun, but I also understand why some people campaign for gun ownership. '}, {'emotion': 'Excitement', 'intensity': '4', 'reason': "the woman's words are exactly what I feel. Criminals with guns will not care about laws"}, {'emotion': 'Disgust', 'i…	[{'emotion': 'Fear', 'intensity': '3', 'reason': "it is undeniable in some situations the guns do save our lives, but in most cases, when we heard of gunshootingl it's about bad things.", 'url': 'anonymous-source/all_shooting_images_newest/10366.jpg'}, {'emotion': 'Awe', 'intensity': '3', 'reason': "I don't agree that guns legalization, because I think there are many more criminals who hurt other…
67	Doves fly, hundreds form human chain and marquees go dark for 1 year anniversary of Las Vegas shooting	anonymous-source/all_shooting_images_newest/100288.jpg	[{'emotion': 'Excitement', 'intensity': '1', 'reason': 'actually not familiar with the topic '}, {'emotion': 'Excitement', 'intensity': '3', 'reason': "I'm glad that they remind people of what happened."}, {'emotion': 'Sadness', 'intensity': '3', 'reason': 'the trauma lasts'}, {'emotion': 'Sadness', 'intensity': '3', 'reason': 'I do not like it '}, {'emotion': 'Sadness', 'intensity': '4', 'reason…	[{'emotion': 'Amusement', 'intensity': '3', 'reason': 'sad'}, {'emotion': 'Fear', 'intensity': '3', 'reason': 'I would not know how to respond this without context'}, {'emotion': 'Awe', 'intensity': '2', 'reason': 'not quite sure what is happening but seems a solemn action'}, {'emotion': 'Sadness', 'intensity': '5', 'reason': "It's nice seeing people come together and show support for one another…	[{'emotion': 'Awe', 'intensity': '3', 'reason': 'this kind of activities are so warm and necessary to honor the victims.', 'url': 'anonymous-source/all_shooting_images_newest/100288.jpg'}, {'emotion': 'Sadness', 'intensity': '3', 'reason': 'This form of assembly makes me feel sad.', 'url': 'anonymous-source/all_shooting_images_newest/100288.jpg'}, {'emotion': 'Awe', 'intensity': '4', 'reason': 'I…
68	Naperville students remember shooting victims, call for gun reform during national school walkout	anonymous-source/all_shooting_images_newest/10590.jpg	[{'emotion': 'Excitement', 'intensity': '3', 'reason': 'more and more students are paying attention on this problem'}, {'emotion': 'Excitement', 'intensity': '4', 'reason': 'I wonder what affects it will have on the gun control.'}, {'emotion': 'Sadness', 'intensity': '3', 'reason': 'students were negatively affected by gun violence at a young age'}, {'emotion': 'Fear', 'intensity': '3', 'reason':…	[{'emotion': 'Amusement', 'intensity': '3', 'reason': 'sad'}, {'emotion': 'Fear', 'intensity': '3', 'reason': 'I would not know how to respond this without context'}, {'emotion': 'Contentment', 'intensity': '3', 'reason': 'young people should be protected, schools are important places'}, {'emotion': 'Fear', 'intensity': '3', 'reason': "As a student, you shouldn't feel unsafe in a place you were s…	[{'emotion': 'Contentment', 'intensity': '3', 'reason': 'it is true that experience or even just witness a gun shooting situation may bring bad result to the students, their call for safety is quite necessary.', 'url': 'anonymous-source/all_shooting_images_newest/10590.jpg'}, {'emotion': 'Sadness', 'intensity': '3', 'reason': 'This form of assembly makes me feel sad and upset.', 'url': 'anonymous…
69	NRA supporters are blowing up Yeti coolers. Yeti says it's all a big mistake.	anonymous-source/all_shooting_images_newest/10644.jpg	[{'emotion': 'Excitement', 'intensity': '1', 'reason': 'actually not familiar with the topic '}, {'emotion': 'Disgust', 'intensity': '2', 'reason': "I'm wondering about the relationship with Yeti coolers and NRA"}, {'emotion': 'Anger', 'intensity': '3', 'reason': "I don't know why guns are so important for them"}, {'emotion': 'Disgust', 'intensity': '3', 'reason': 'I do not like it '}, {'emotion'…	[{'emotion': 'Disgust', 'intensity': '3', 'reason': 'sad'}, {'emotion': 'Amusement', 'intensity': '3', 'reason': 'I would not know how to respond this without context'}, {'emotion': 'Fear', 'intensity': '3', 'reason': 'the boxes seems dangerous maybe weapons in them'}, {'emotion': 'Fear', 'intensity': '3', 'reason': "I'm not too sure what's going on in this picture"}, {'emotion': 'Fear', 'intensi…	[{'emotion': 'Amusement', 'intensity': '3', 'reason': 'I am curious about how these two things relate with each other.', 'url': 'anonymous-source/all_shooting_images_newest/10644.jpg'}, {'emotion': 'Awe', 'intensity': '3', 'reason': "don't know about Yeti coolers.", 'url': 'anonymous-source/all_shooting_images_newest/10644.jpg'}, {'emotion': 'Anger', 'intensity': '3', 'reason': 'Why the supporter…
70	Griffith student charged with accidentally bringing loaded gun inside high school	anonymous-source/all_shooting_images_newest/10112.jpg	[{'emotion': 'Fear', 'intensity': '3', 'reason': "students' life may be put in danger "}, {'emotion': 'Fear', 'intensity': '3', 'reason': "I don't believe it's accidental."}, {'emotion': 'Anger', 'intensity': '3', 'reason': 'why student at that age can have access to the gun'}, {'emotion': 'Excitement', 'intensity': '3', 'reason': 'I think it is interesting'}, {'emotion': 'Contentment', 'intensit…	[{'emotion': 'Disgust', 'intensity': '4', 'reason': 'sad'}, {'emotion': 'Sadness', 'intensity': '3', 'reason': "I would not know how to respond this without more context. It's very sad if this person's a victim of gun violence"}, {'emotion': 'Sadness', 'intensity': '2', 'reason': 'looks like a criminal that was arrested'}, {'emotion': 'Fear', 'intensity': '5', 'reason': "The idea that someone cou…	[{'emotion': 'Sadness', 'intensity': '3', 'reason': "the gun control is not effective so that even a high school student can bring a loaded gun to school. it's also very dangerous cause the teenager haven't develop fully to control their emotions and this may cause tragedies.", 'url': 'anonymous-source/all_shooting_images_newest/10112.jpg'}, {'emotion': 'Anger', 'intensity': '3', 'reason': 'For t…
71	More than 20,000 Americans a year kill themselves with a gun. Alarmed gun sellers are joining the suicide prevention fight.	anonymous-source/all_shooting_images_newest/90109.jpg	[{'emotion': 'Sadness', 'intensity': '3', 'reason': 'so many people choose gun to consider suicide '}, {'emotion': 'Excitement', 'intensity': '3', 'reason': "I think it's ironic that the sellers are joining the suicide prevention fight, because the sellers indirectly kill them by selling guns to them."}, {'emotion': 'Sadness', 'intensity': '3', 'reason': "if they hadn't had access to gun, they ma…	[{'emotion': 'Disgust', 'intensity': '5', 'reason': 'sad'}, {'emotion': 'Contentment', 'intensity': '3', 'reason': "I don't think shooting rings are problematic. So these pictures don't trigger me in any way. "}, {'emotion': 'Anger', 'intensity': '3', 'reason': 'though maybe a training field, that may lead to potiential violence'}, {'emotion': 'Anger', 'intensity': '4', 'reason': "I think shootin…	[{'emotion': 'Sadness', 'intensity': '3', 'reason': 'I never thought that people will use a gun to suicide. But this do call for attention, that guns are too dangerous for people to hold by themselves.', 'url': 'anonymous-source/all_shooting_images_newest/90109.jpg'}, {'emotion': 'Sadness', 'intensity': '3', 'reason': 'The legal age for holding guns should be raised, and government should do the …
72	Bernie Sanders Called a Hypocrite by Gun-Rights Advocates for Armed Police Guard at Student Walkout	anonymous-source/all_shooting_images_newest/10253.jpg	[{'emotion': 'Excitement', 'intensity': '1', 'reason': 'have no idea of what happened '}, {'emotion': 'Sadness', 'intensity': '2', 'reason': 'I doubt the safety of going to school after seeing this.'}, {'emotion': 'Anger', 'intensity': '1', 'reason': 'politicians need to do more practically to show they care'}, {'emotion': 'Sadness', 'intensity': '3', 'reason': 'I do not like it '}, {'emotion': '…	[{'emotion': 'Amusement', 'intensity': '3', 'reason': 'sad'}, {'emotion': 'Fear', 'intensity': '3', 'reason': 'I would want to know the context in which guns are being mentioned. We, as citizens should be aware of gun control/ violence-related happenings around us. '}, {'emotion': 'Awe', 'intensity': '3', 'reason': 'politicians should take action towards those cases related to guns'}, {'emotion':…	[{'emotion': 'Anger', 'intensity': '3', 'reason': 'the fact that being regarded as hypocrite by gun-right advocate is ridiculous.', 'url': 'anonymous-source/all_shooting_images_newest/10253.jpg'}, {'emotion': 'Sadness', 'intensity': '3', 'reason': 'I think the United States may not be able to achieve the gun ban in the next few decades.', 'url': 'anonymous-source/all_shooting_images_newest/10253.…
73	U.S. judge halts release of blueprints for 3-D printed guns	anonymous-source/all_shooting_images_newest/296.jpg	[{'emotion': 'Excitement', 'intensity': '3', 'reason': '3-D printed guns should be avoided. '}, {'emotion': 'Anger', 'intensity': '4', 'reason': 'Why would they release a blueprint for guns? It might cause more gun issues.'}, {'emotion': 'Contentment', 'intensity': '3', 'reason': "there's someone in this Country notice the problem"}, {'emotion': 'Anger', 'intensity': '3', 'reason': 'I do not like…	[{'emotion': 'Amusement', 'intensity': '1', 'reason': 'sad'}, {'emotion': 'Disgust', 'intensity': '3', 'reason': 'Donald Trump mostly gives out controversial statements, so in terms of Gun Violence it is expected that his thoughts would be conservative. I would be irritated to see him share his opinions on it. '}, {'emotion': 'Awe', 'intensity': '2', 'reason': 'trump in meditation about the viole…	[{'emotion': 'Contentment', 'intensity': '3', 'reason': 'before the government come up with a better solution about gun control, they should pay no attention to 3D -print of guns anymore.', 'url': 'anonymous-source/all_shooting_images_newest/296.jpg'}, {'emotion': 'Contentment', 'intensity': '3', 'reason': 'I think this is a good trend.', 'url': 'anonymous-source/all_shooting_images_newest/296.jp…
74	Gun control advocates take their campaign to the state with more registered guns than any in the US - ABC News	anonymous-source/all_shooting_images_newest/110492.jpg	[{'emotion': 'Excitement', 'intensity': '1', 'reason': 'have no idea of what happened '}, {'emotion': 'Excitement', 'intensity': '3', 'reason': "I think it's the right thing to do, but concerned about their safety"}, {'emotion': 'Excitement', 'intensity': '3', 'reason': 'someone is trying to solve the problem'}, {'emotion': 'Amusement', 'intensity': '3', 'reason': 'I think it is funny'}, {'emotio…	[{'emotion': 'Amusement', 'intensity': '1', 'reason': 'sad'}, {'emotion': 'Amusement', 'intensity': '3', 'reason': 'I would want to know the context in which guns are being mentioned. We, as citizens should be aware of gun control/ violence-related happenings around us. '}, {'emotion': 'Contentment', 'intensity': '2', 'reason': 'I think the woman is giving out useful suggestions'}, {'emotion': 'C…	[{'emotion': 'Fear', 'intensity': '3', 'reason': 'a state with so man people holding guns by themselves makes people afraid.', 'url': 'anonymous-source/all_shooting_images_newest/110492.jpg'}, {'emotion': 'Contentment', 'intensity': '3', 'reason': 'I think this is good for public safety in the future.', 'url': 'anonymous-source/all_shooting_images_newest/110492.jpg'}, {'emotion': 'Fear', 'intensi…
75	The Kentucky Kroger shooting may have been a racist attack	anonymous-source/all_shooting_images_newest/100001.jpg	[{'emotion': 'Sadness', 'intensity': '3', 'reason': 'so many questions could cause gun problems '}, {'emotion': 'Fear', 'intensity': '3', 'reason': 'racism is something that also needs to be addressed. '}, {'emotion': 'Anger', 'intensity': '4', 'reason': 'racism has never disappeared in this Country. gun control can help reduce tragedy'}, {'emotion': 'Excitement', 'intensity': '3', 'reason': 'I l…	[{'emotion': 'Awe', 'intensity': '3', 'reason': 'sad'}, {'emotion': 'Fear', 'intensity': '3', 'reason': 'I would want to know the context in which guns are being mentioned. We, as citizens should be aware of gun violence related happenings around us. '}, {'emotion': 'Fear', 'intensity': '3', 'reason': 'guns can kill lives so easily'}, {'emotion': 'Disgust', 'intensity': '4', 'reason': 'Someone cr…	[{'emotion': 'Sadness', 'intensity': '3', 'reason': 'gun shooting are always related to gender or race bias, which is really bad.', 'url': 'anonymous-source/all_shooting_images_newest/100001.jpg'}, {'emotion': 'Fear', 'intensity': '3', 'reason': 'The gun incident has indeed triggered hatred among races.', 'url': 'anonymous-source/all_shooting_images_newest/100001.jpg'}, {'emotion': 'Anger', 'inte…
76	Former Supreme Court Justice Stevens: Repeal the Second Amendment	anonymous-source/all_shooting_images_newest/10368.jpg	[{'emotion': 'Excitement', 'intensity': '1', 'reason': 'have no idea of what happened '}, {'emotion': 'Amusement', 'intensity': '4', 'reason': 'I would like to see that happen.'}, {'emotion': 'Contentment', 'intensity': '3', 'reason': 'sorry I am not quite familiar with this topic about second amendment'}, {'emotion': 'Anger', 'intensity': '3', 'reason': 'I do not like it '}, {'emotion': 'Awe', '…	[{'emotion': 'Sadness', 'intensity': '3', 'reason': 'sad'}, {'emotion': 'Disgust', 'intensity': '4', 'reason': 'it is scary to see how many people are okay with 2nd amendment rights '}, {'emotion': 'Excitement', 'intensity': '4', 'reason': 'the amendment, if just let guns killing lives, should be reconsidered'}, {'emotion': 'Contentment', 'intensity': '4', 'reason': 'I agree, many people believe …	[{'emotion': 'Excitement', 'intensity': '3', 'reason': 'it is necessary for people to call for their own rights to make the government pay more attention to the gun issues.', 'url': 'anonymous-source/all_shooting_images_newest/10368.jpg'}, {'emotion': 'Awe', 'intensity': '3', 'reason': "don't know much about Second Amendment.", 'url': 'anonymous-source/all_shooting_images_newest/10368.jpg'}, {'em…
77	Pittsburgh sports teams pay tribute to synagogue shooting victims	anonymous-source/all_shooting_images_newest/100304.jpg	[{'emotion': 'Excitement', 'intensity': '3', 'reason': 'this can help more people to realize the problem of gun problems '}, {'emotion': 'Excitement', 'intensity': '2', 'reason': "I think it's the right thing to do, but the sports teams are also the victims"}, {'emotion': 'Sadness', 'intensity': '3', 'reason': 'something should be done to prevent this kind of tragedy'}, {'emotion': 'Anger', 'inte…	[{'emotion': 'Disgust', 'intensity': '1', 'reason': 'sad'}, {'emotion': 'Amusement', 'intensity': '3', 'reason': "I'm not sure what this is about"}, {'emotion': 'Awe', 'intensity': '2', 'reason': 'suspicion and hate should not lead to loss of lives'}, {'emotion': 'Contentment', 'intensity': '3', 'reason': "It's nice to see those that have a platform, use the platform to show their support "}, {'e…	[{'emotion': 'Awe', 'intensity': '3', 'reason': 'such warm actions are necessary to honor the victims.', 'url': 'anonymous-source/all_shooting_images_newest/100304.jpg'}, {'emotion': 'Sadness', 'intensity': '3', 'reason': 'The gun incident has triggered sadness among people and among religions.', 'url': 'anonymous-source/all_shooting_images_newest/100304.jpg'}, {'emotion': 'Awe', 'intensity': '3'…
78	School shootings will scar a generation of students	anonymous-source/all_shooting_images_newest/10732.jpg	[{'emotion': 'Sadness', 'intensity': '3', 'reason': 'students are involved in gun problems as well '}, {'emotion': 'Sadness', 'intensity': '3', 'reason': "I feel sad because it's true. "}, {'emotion': 'Sadness', 'intensity': '5', 'reason': 'the trauma lasts. students should not have experienced these at a very young age'}, {'emotion': 'Sadness', 'intensity': '3', 'reason': 'I do not like it '}, {…	[{'emotion': 'Sadness', 'intensity': '1', 'reason': 'sad'}, {'emotion': 'Anger', 'intensity': '3', 'reason': "it's really sad that schools and kids get are such common targets of gun violence "}, {'emotion': 'Contentment', 'intensity': '2', 'reason': "students' security should be guaranteed"}, {'emotion': 'Fear', 'intensity': '5', 'reason': 'Again, school shootings are becoming a little too natur…	[{'emotion': 'Sadness', 'intensity': '3', 'reason': 'it is true that students who experience or just witness a gun shoot will be badly influenced for his or her whole life. (PTSD)', 'url': 'anonymous-source/all_shooting_images_newest/10732.jpg'}, {'emotion': 'Sadness', 'intensity': '3', 'reason': 'I think this statement has become a reality.', 'url': 'anonymous-source/all_shooting_images_newest/1…
79	Michael Moore: NRA is a terrorist organization ; media should treat gun-rights group like ISIS	anonymous-source/all_shooting_images_newest/10671.jpg	[{'emotion': 'Excitement', 'intensity': '1', 'reason': 'not familiar with this topic '}, {'emotion': 'Excitement', 'intensity': '2', 'reason': 'I agree, but treating them like ISIS might be too much'}, {'emotion': 'Contentment', 'intensity': '3', 'reason': "that's exactly what I thought"}, {'emotion': 'Disgust', 'intensity': '3', 'reason': 'I do not like it '}, {'emotion': 'Sadness', 'intensity':…	[{'emotion': 'Amusement', 'intensity': '3', 'reason': 'sad'}, {'emotion': 'Amusement', 'intensity': '3', 'reason': "I wouldn't know what to think about it without more context "}, {'emotion': 'Awe', 'intensity': '2', 'reason': 'think he is thinking into the problem deeply'}, {'emotion': 'Fear', 'intensity': '3', 'reason': "I don't know who this man is. "}, {'emotion': 'Fear', 'intensity': '1', 'r…	[{'emotion': 'Contentment', 'intensity': '3', 'reason': 'it is true that gun shooting is not a good thing. but treat NRA as a terrorist organization is too exaggerate.', 'url': 'anonymous-source/all_shooting_images_newest/10671.jpg'}, {'emotion': 'Awe', 'intensity': '3', 'reason': "I think it's awe but somewhat a true that gun-rights group can threaten the public's safety.", 'url': 'anonymous-sou…
80	Retired firefighter found guilty for shooting at lost black teen on doorstep	anonymous-source/all_shooting_images_newest/100223.jpg	[{'emotion': 'Anger', 'intensity': '2', 'reason': 'I just think that news is sensational'}, {'emotion': 'Anger', 'intensity': '3', 'reason': 'racist and a teenager got gun shot'}, {'emotion': 'Sadness', 'intensity': '4', 'reason': "I don't know the background of the event but it makes it seem like the teen was innocent and did not deserve to get shot."}, {'emotion': 'Disgust', 'intensity': '3', '…	[{'emotion': 'Fear', 'intensity': '3', 'reason': 'Accompanied by gun violence, casualties will inevitably result.'}, {'emotion': 'Anger', 'intensity': '4', 'reason': 'he is shooting an animal '}, {'emotion': 'Fear', 'intensity': '2', 'reason': 'this would scare me so badly if it was in my neighborhood'}, {'emotion': 'Fear', 'intensity': '1', 'reason': 'typically places of lower income have more g…	[{'emotion': 'Fear', 'intensity': '5', 'reason': 'never expect that a firefighter would do such things', 'url': 'anonymous-source/all_shooting_images_newest/100223.jpg'}, {'emotion': 'Anger', 'intensity': '4', 'reason': 'the bias against black people is absolutely revolting. ', 'url': 'anonymous-source/all_shooting_images_newest/100223.jpg'}, {'emotion': 'Disgust', 'intensity': '3', 'reason': 'I …
81	Kroger shooting in Kentucky is being investigated as a hate crime	anonymous-source/all_shooting_images_newest/100460.jpg	[{'emotion': 'Contentment', 'intensity': '1', 'reason': 'It happens a lot'}, {'emotion': 'Sadness', 'intensity': '3', 'reason': 'shot others because of hate'}, {'emotion': 'Disgust', 'intensity': '3', 'reason': "anything involving hate crimes is terrible. I don't get how some people can be filled with so much hate."}, {'emotion': 'Sadness', 'intensity': '3', 'reason': "it's tragic that it occurre…	[{'emotion': 'Sadness', 'intensity': '3', 'reason': 'Accompanied by gun violence, casualties will inevitably result.'}, {'emotion': 'Fear', 'intensity': '4', 'reason': 'I feel like this woman got killed'}, {'emotion': 'Sadness', 'intensity': '3', 'reason': 'these people probably died from gun violence and it makes me sad'}, {'emotion': 'Sadness', 'intensity': '3', 'reason': 'these feel like pictu…	[{'emotion': 'Sadness', 'intensity': '3', 'reason': 'hate is not the reason someone can take others lives away', 'url': 'anonymous-source/all_shooting_images_newest/100460.jpg'}, {'emotion': 'Sadness', 'intensity': '4', 'reason': "hate crimes against people of color are so prevalent. It's extremely sad and fearful as I am a minority. ", 'url': 'anonymous-source/all_shooting_images_newest/100460.j…
82	Power Briefing: Paul Ryan dumps cold water on sweeping gun-control measures	anonymous-source/all_shooting_images_newest/10650.jpg	[{'emotion': 'Contentment', 'intensity': '1', 'reason': 'It doesnt really effect my life, but I am also pro gun'}, {'emotion': 'Sadness', 'intensity': '3', 'reason': 'gun problem should be paid more attention '}, {'emotion': 'Contentment', 'intensity': '3', 'reason': "I don't know enough about this event."}, {'emotion': 'Anger', 'intensity': '3', 'reason': 'slowing down gun reform is only going t…	[{'emotion': 'Contentment', 'intensity': '3', 'reason': 'More and more people are aware of the dangers of gun violence.'}, {'emotion': 'Amusement', 'intensity': '1', 'reason': 'I feel like this will not change the situation of gun violence '}, {'emotion': 'Disgust', 'intensity': '1', 'reason': "I don't know who this is "}, {'emotion': 'Contentment', 'intensity': '1', 'reason': 'this photo does no…	[{'emotion': 'Sadness', 'intensity': '4', 'reason': 'I think guns should be controled well ', 'url': 'anonymous-source/all_shooting_images_newest/10650.jpg'}, {'emotion': 'Sadness', 'intensity': '3', 'reason': 'gun control laws are very important and him opposing it makes me sad and unsafe. ', 'url': 'anonymous-source/all_shooting_images_newest/10650.jpg'}, {'emotion': 'Fear', 'intensity': '3', '…
83	Kavanaugh faces questions on Roe v. Wade, Second Amendment Video	anonymous-source/all_shooting_images_newest/90463.jpg	[{'emotion': 'Excitement', 'intensity': '1', 'reason': 'Im not excited im interested in the case because it is relevant'}, {'emotion': 'Excitement', 'intensity': '1', 'reason': "can't know the whole news by just looking at the title"}, {'emotion': 'Contentment', 'intensity': '3', 'reason': 'I know about Roe v. Wade but I am all for women being able to choose when it comes to abortions.'}, {'emoti…	[{'emotion': 'Contentment', 'intensity': '3', 'reason': 'More and more people are aware of the dangers of gun violence.'}, {'emotion': 'Amusement', 'intensity': '2', 'reason': 'this seems like a political issue and I am not that interested in that '}, {'emotion': 'Disgust', 'intensity': '5', 'reason': "I hate Brett kavanaugh he is a rapist and I don't understand how he is a Supreme Court justice"…	[{'emotion': 'Contentment', 'intensity': '1', 'reason': 'not very sure what this news is about', 'url': 'anonymous-source/all_shooting_images_newest/90463.jpg'}, {'emotion': 'Disgust', 'intensity': '3', 'reason': 'I feel that Roe v. Wade is extremely important. ', 'url': 'anonymous-source/all_shooting_images_newest/90463.jpg'}, {'emotion': 'Fear', 'intensity': '3', 'reason': "Don't know enough to…
84	Massacre fatigue: Do we ignore shootings?	anonymous-source/all_shooting_images_newest/110491.jpg	[{'emotion': 'Contentment', 'intensity': '1', 'reason': 'You should add annoyed into the list of emotions please.'}, {'emotion': 'Excitement', 'intensity': '3', 'reason': 'gun problem is being paid more attention '}, {'emotion': 'Sadness', 'intensity': '3', 'reason': "I don't necessarily agree with this statement/question. I think we have a lot of work left to do but we have made some progress."}…	[{'emotion': 'Fear', 'intensity': '3', 'reason': 'Accompanied by gun violence, casualties will inevitably result.'}, {'emotion': 'Fear', 'intensity': '3', 'reason': 'someone probable got killed'}, {'emotion': 'Sadness', 'intensity': '1', 'reason': 'this is concerning in the fact of gun violence It makes me sad'}, {'emotion': 'Fear', 'intensity': '3', 'reason': 'seeing people in jail makes me wond…	[{'emotion': 'Contentment', 'intensity': '5', 'reason': 'we should have notice that long time ago. There are too many cases about gun violence. And we should have taken good attention about that', 'url': 'anonymous-source/all_shooting_images_newest/110491.jpg'}, {'emotion': 'Sadness', 'intensity': '3', 'reason': 'we should not ignore shootings, but we are. ', 'url': 'anonymous-source/all_shooting…
85	New research debunks cherry-picked pro-gun control study the mainstream media routinely cite	anonymous-source/all_shooting_images_newest/90025.jpg	[{'emotion': 'Awe', 'intensity': '1', 'reason': 'I dont really understand the sentence'}, {'emotion': 'Excitement', 'intensity': '3', 'reason': 'gun problem is being paid more attention '}, {'emotion': 'Contentment', 'intensity': '3', 'reason': "I don't know enough about this event. "}, {'emotion': 'Anger', 'intensity': '3', 'reason': 'I feel like many articles that are pro-second amendment cherr…	[{'emotion': 'Disgust', 'intensity': '3', 'reason': 'I hope not to sell guns.'}, {'emotion': 'Anger', 'intensity': '4', 'reason': 'this seems like a photo for gun advocates'}, {'emotion': 'Disgust', 'intensity': '1', 'reason': "I don't think automatic guns should be accessible to people at all"}, {'emotion': 'Fear', 'intensity': '4', 'reason': "I feel more fearful around people with guns who have…	[{'emotion': 'Fear', 'intensity': '1', 'reason': 'no further detials about this news and I have no idea what it is exactly about', 'url': 'anonymous-source/all_shooting_images_newest/90025.jpg'}, {'emotion': 'Amusement', 'intensity': '1', 'reason': 'I want to read the new research that supposedly debunks pro-gun control study. ', 'url': 'anonymous-source/all_shooting_images_newest/90025.jpg'}, {'…
86	In a Crucial Pennsylvania District, Gun Policy Reigns Supreme	anonymous-source/all_shooting_images_newest/100140.jpg	[{'emotion': 'Contentment', 'intensity': '1', 'reason': 'It makes sense '}, {'emotion': 'Excitement', 'intensity': '1', 'reason': 'can really be sure what the policy is '}, {'emotion': 'Contentment', 'intensity': '3', 'reason': "I don't know much about this but I stand for gun control and I think that if this policy is strict then I am happy, but if it is very loose I would not be for it."}, {'em…	[{'emotion': 'Contentment', 'intensity': '3', 'reason': 'More and more people are aware of the dangers of gun violence.'}, {'emotion': 'Amusement', 'intensity': '4', 'reason': 'I feel like someone really cares abt gun violence.'}, {'emotion': 'Contentment', 'intensity': '1', 'reason': "I don't really understand what is going on here at all"}, {'emotion': 'Contentment', 'intensity': '3', 'reason':…	[{'emotion': 'Amusement', 'intensity': '5', 'reason': 'I always want guns to be good controled', 'url': 'anonymous-source/all_shooting_images_newest/100140.jpg'}, {'emotion': 'Fear', 'intensity': '5', 'reason': 'learning that people in Pennsylvania can carry a gun without a permit makes me feel very fearful for miniorities. ', 'url': 'anonymous-source/all_shooting_images_newest/100140.jpg'}, {'em…
87	Video of Columbine Massacre Shown in School for Active Shooter Training	anonymous-source/all_shooting_images_newest/10508.jpg	[{'emotion': 'Contentment', 'intensity': '1', 'reason': 'This is a valid use of training '}, {'emotion': 'Disgust', 'intensity': '3', 'reason': "don't think it's a proper way to teach "}, {'emotion': 'Disgust', 'intensity': '4', 'reason': "That's so wrong on many levels. All that would do is traumatize kids."}, {'emotion': 'Disgust', 'intensity': '3', 'reason': "there is no reason why a video of …	[{'emotion': 'Fear', 'intensity': '3', 'reason': 'Accompanied by gun violence, casualties will inevitably result.'}, {'emotion': 'Fear', 'intensity': '4', 'reason': 'I feel like something bad is going to happen '}, {'emotion': 'Disgust', 'intensity': '5', 'reason': "the Columbine shooting affected me so much and made me so fearful in high school it disgusts me now I don't know how they could have…	[{'emotion': 'Fear', 'intensity': '5', 'reason': 'I am afraid something similar happened to me ', 'url': 'anonymous-source/all_shooting_images_newest/10508.jpg'}, {'emotion': 'Fear', 'intensity': '5', 'reason': 'the photo makes this situation even more real and I would be completely terrified. ', 'url': 'anonymous-source/all_shooting_images_newest/10508.jpg'}, {'emotion': 'Fear', 'intensity': '3'…
88	NRA depicts children's show characters in KKK hoods to criticize cast diversity	anonymous-source/all_shooting_images_newest/90462.jpg	[{'emotion': 'Awe', 'intensity': '3', 'reason': 'I dont understand the sentence '}, {'emotion': 'Excitement', 'intensity': '1', 'reason': "actually don't know what happened"}, {'emotion': 'Disgust', 'intensity': '3', 'reason': "I don't see any point in doing something like this. I think it is best to avoid doing anything that involves the image of the KKK."}, {'emotion': 'Anger', 'intensity': '3'…	[{'emotion': 'Excitement', 'intensity': '3', 'reason': 'More and more people are aware of the dangers of gun violence.'}, {'emotion': 'Contentment', 'intensity': '1', 'reason': 'I dont think this is going to solve the problem '}, {'emotion': 'Contentment', 'intensity': '1', 'reason': "I don't feel anything I don't know who this is"}, {'emotion': 'Contentment', 'intensity': '3', 'reason': 'this ph…	[{'emotion': 'Excitement', 'intensity': '1', 'reason': 'have no idea what this news is exactly about', 'url': 'anonymous-source/all_shooting_images_newest/90462.jpg'}, {'emotion': 'Disgust', 'intensity': '4', 'reason': 'representation in media for minorities is already very little. The fact that NRA is doing that is very sad. ', 'url': 'anonymous-source/all_shooting_images_newest/90462.jpg'}, {'e…
89	Me + You Productions Spring Awakening advocates for gun control HS Insider	anonymous-source/all_shooting_images_newest/90380.jpg	[{'emotion': 'Awe', 'intensity': '1', 'reason': 'Again, I do not understand this sentence or headline '}, {'emotion': 'Excitement', 'intensity': '3', 'reason': 'gun problem is being paid more attention '}, {'emotion': 'Contentment', 'intensity': '3', 'reason': 'It makes me safer to know that people are fighting for stricter gun control policies.'}, {'emotion': 'Contentment', 'intensity': '3', 're…	[{'emotion': 'Excitement', 'intensity': '3', 'reason': 'More and more people are aware of the dangers of gun violence.'}, {'emotion': 'Awe', 'intensity': '2', 'reason': 'I think this is a better way to maybe solve the problem '}, {'emotion': 'Contentment', 'intensity': '1', 'reason': "I don't know what this is"}, {'emotion': 'Fear', 'intensity': '3', 'reason': 'seeing young people in the context …	[{'emotion': 'Excitement', 'intensity': '4', 'reason': 'Always wishes that guns to be good controled', 'url': 'anonymous-source/all_shooting_images_newest/90380.jpg'}, {'emotion': 'Disgust', 'intensity': '4', 'reason': "it's disappointing for a play to do this. ", 'url': 'anonymous-source/all_shooting_images_newest/90380.jpg'}, {'emotion': 'Contentment', 'intensity': '3', 'reason': 'I think its i…
90	Robert Bowers: anti-Semite, anti-migrant and gun fanatic	anonymous-source/all_shooting_images_newest/100227.jpg	[{'emotion': 'Anger', 'intensity': '1', 'reason': 'I hate anti-semites'}, {'emotion': 'Excitement', 'intensity': '3', 'reason': 'gun problem is being paid more attention '}, {'emotion': 'Disgust', 'intensity': '4', 'reason': "This person seems like a very intolerant person. I think I don't know enough about this man to give a real explanation, but I don't think being a gun fanatic is very safe."}…	[{'emotion': 'Anger', 'intensity': '3', 'reason': 'Accompanied by gun violence, casualties will inevitably result.'}, {'emotion': 'Fear', 'intensity': '3', 'reason': 'he seems to killed someone '}, {'emotion': 'Disgust', 'intensity': '2', 'reason': "I don't know who this is but he looks suspicious "}, {'emotion': 'Fear', 'intensity': '2', 'reason': 'you never know who is capable of having a gun s…	[{'emotion': 'Fear', 'intensity': '5', 'reason': 'Have a feelings that he would use guns to kill somebody', 'url': 'anonymous-source/all_shooting_images_newest/100227.jpg'}, {'emotion': 'Sadness', 'intensity': '3', 'reason': 'he seems to hate so many groups of minorities. ', 'url': 'anonymous-source/all_shooting_images_newest/100227.jpg'}, {'emotion': 'Disgust', 'intensity': '3', 'reason': 'that …
91	California bar massacre leaves another American community reeling after 12 gunned down by Marine veteran	anonymous-source/all_shooting_images_newest/110043.jpg	[{'emotion': 'Awe', 'intensity': '1', 'reason': 'Its shocking that someone can do this'}, {'emotion': 'Excitement', 'intensity': '3', 'reason': 'gun problem is being paid more attention '}, {'emotion': 'Sadness', 'intensity': '4', 'reason': 'many of our veterans come home without good support and I feel like we can and should be doing a better job at taking care of our veterans. Especially those …	[{'emotion': 'Sadness', 'intensity': '3', 'reason': 'Accompanied by gun violence, casualties will inevitably result.'}, {'emotion': 'Sadness', 'intensity': '3', 'reason': 'their family might have died'}, {'emotion': 'Sadness', 'intensity': '2', 'reason': 'this looks like a group of people mourning an unexpected loss to gun violence'}, {'emotion': 'Sadness', 'intensity': '3', 'reason': 'families s…	[{'emotion': 'Sadness', 'intensity': '3', 'reason': 'It is a sad news that somebody were killed by guns.', 'url': 'anonymous-source/all_shooting_images_newest/110043.jpg'}, {'emotion': 'Sadness', 'intensity': '5', 'reason': '12 lives were lost.', 'url': 'anonymous-source/all_shooting_images_newest/110043.jpg'}, {'emotion': 'Sadness', 'intensity': '4', 'reason': 'this is not okay', 'url': 'anonymo…
92	In closed-door meeting, Roskam brings pro-gun rights teens to talk gun violence prevention with students	anonymous-source/all_shooting_images_newest/10653.jpg	[{'emotion': 'Awe', 'intensity': '1', 'reason': 'Makes sense but out of context it is hard to understand the point'}, {'emotion': 'Excitement', 'intensity': '3', 'reason': 'gun problem is being paid more attention '}, {'emotion': 'Contentment', 'intensity': '3', 'reason': "I'm happy there are people out there trying to make a difference. I also think talking with students about these issues is vi…	[{'emotion': 'Contentment', 'intensity': '3', 'reason': 'More and more people are aware of the dangers of gun violence.'}, {'emotion': 'Disgust', 'intensity': '2', 'reason': 'this seems to be another political issue'}, {'emotion': 'Contentment', 'intensity': '1', 'reason': "I don't feel anything because I don't know who he is"}, {'emotion': 'Contentment', 'intensity': '1', 'reason': 'this photo d…	[{'emotion': 'Contentment', 'intensity': '4', 'reason': "I can't agree more that teen students shouldn't be allowed to use guns. Because they might be too impulsive. And it's very dangerous to let students have guns.", 'url': 'anonymous-source/all_shooting_images_newest/10653.jpg'}, {'emotion': 'Awe', 'intensity': '3', 'reason': 'I wondered how the different perspective on gun control would have …
93	Brett Kavanaugh Claims He Grew Up in 'City Plagued By Gun Violence,' Is Full of It	anonymous-source/all_shooting_images_newest/90465.jpg	[{'emotion': 'Disgust', 'intensity': '3', 'reason': 'And what is this proving?'}, {'emotion': 'Sadness', 'intensity': '3', 'reason': "gun problem can actually affect people's life"}, {'emotion': 'Contentment', 'intensity': '3', 'reason': 'I have no idea where he is from, but if gun violence really is that prevalent then I completely agree. There are many areas in the country plagued by gun violen…	[{'emotion': 'Contentment', 'intensity': '3', 'reason': 'More and more people are aware of the dangers of gun violence.'}, {'emotion': 'Disgust', 'intensity': '4', 'reason': 'I dont think politics can help '}, {'emotion': 'Disgust', 'intensity': '4', 'reason': 'brett kavanaugh is a rapist and should not be a justice'}, {'emotion': 'Contentment', 'intensity': '1', 'reason': 'this photo does not ev…	[{'emotion': 'Contentment', 'intensity': '4', 'reason': 'He might take actions to control gun violance', 'url': 'anonymous-source/all_shooting_images_newest/90465.jpg'}, {'emotion': 'Amusement', 'intensity': '1', 'reason': 'I\'m unaware if he actually grew up in a "city plagued by city violence." ', 'url': 'anonymous-source/all_shooting_images_newest/90465.jpg'}, {'emotion': 'Sadness', 'intensity…
94	Florida sheriff supports armed teachers in schools to stop shooters	anonymous-source/all_shooting_images_newest/110508.jpg	[{'emotion': 'Anger', 'intensity': '3', 'reason': 'Why tho? Dont bring more guns into schools'}, {'emotion': 'Excitement', 'intensity': '3', 'reason': 'students are protected'}, {'emotion': 'Sadness', 'intensity': '3', 'reason': "it makes me sad to think that we have gotten to the point where people think we even need to arm our teachers because the police can't get there fast enough. I understan…	[{'emotion': 'Excitement', 'intensity': '3', 'reason': 'More and more people are aware of the dangers of gun violence.'}, {'emotion': 'Contentment', 'intensity': '4', 'reason': 'someone is finally doing something to solve the problem'}, {'emotion': 'Contentment', 'intensity': '1', 'reason': "I don't know who he is"}, {'emotion': 'Fear', 'intensity': '3', 'reason': 'I think sometimes even people w…	[{'emotion': 'Contentment', 'intensity': '4', 'reason': 'Teachers need to have power to protect themselves and students from bad guys. But we need to make sure that teachers can make good use of their guns. Otherwise it would be a disaster', 'url': 'anonymous-source/all_shooting_images_newest/110508.jpg'}, {'emotion': 'Contentment', 'intensity': '4', 'reason': 'this is the bare minimum. ', 'url':…
95	California Today: Limiting Ammunition to Thwart Gun Violence	anonymous-source/all_shooting_images_newest/90059.jpg	[{'emotion': 'Disgust', 'intensity': '3', 'reason': 'This is stupid. People will just get it another way'}, {'emotion': 'Excitement', 'intensity': '3', 'reason': 'gun problem is being paid more attention '}, {'emotion': 'Contentment', 'intensity': '4', 'reason': 'this makes a lot of sense. Less ammo'}, {'emotion': 'Anger', 'intensity': '3', 'reason': '??? maybe instead of limiting the amount of a…	[{'emotion': 'Disgust', 'intensity': '3', 'reason': 'I hope not to sell guns.'}, {'emotion': 'Contentment', 'intensity': '3', 'reason': 'someone is finally doing something to solve the problem'}, {'emotion': 'Disgust', 'intensity': '2', 'reason': 'it is too easy for people to get guns in the US and it disgusts me'}, {'emotion': 'Fear', 'intensity': '3', 'reason': 'police have been held responsibl…	[{'emotion': 'Contentment', 'intensity': '4', 'reason': 'the world will be better with less weapons', 'url': 'anonymous-source/all_shooting_images_newest/90059.jpg'}, {'emotion': 'Contentment', 'intensity': '4', 'reason': 'once again, this is the bare minimum. ', 'url': 'anonymous-source/all_shooting_images_newest/90059.jpg'}, {'emotion': 'Sadness', 'intensity': '3', 'reason': "Don't know enough …
96	As US midterms approach, moms hit the trail to preach gun control	anonymous-source/all_shooting_images_newest/100152.jpg	[{'emotion': 'Awe', 'intensity': '3', 'reason': 'Hopefully they can make a change.'}, {'emotion': 'Excitement', 'intensity': '3', 'reason': 'everyone is paying attention on the gun problem'}, {'emotion': 'Contentment', 'intensity': '3', 'reason': 'I think this could be a great gun control campaign involving mothers.'}, {'emotion': 'Contentment', 'intensity': '3', 'reason': 'I support the efforts …	[{'emotion': 'Contentment', 'intensity': '3', 'reason': 'More and more people are aware of the dangers of gun violence.'}, {'emotion': 'Excitement', 'intensity': '1', 'reason': 'I cannot relate with this picture'}, {'emotion': 'Contentment', 'intensity': '1', 'reason': "I don't know who this is"}, {'emotion': 'Contentment', 'intensity': '3', 'reason': 'figures who seem gentle and nice make me mor…	[{'emotion': 'Awe', 'intensity': '4', 'reason': 'everybody should take actions to fight gun violance', 'url': 'anonymous-source/all_shooting_images_newest/100152.jpg'}, {'emotion': 'Contentment', 'intensity': '4', 'reason': "I'm glad parents are worried enough to do this. ", 'url': 'anonymous-source/all_shooting_images_newest/100152.jpg'}, {'emotion': 'Fear', 'intensity': '3', 'reason': "Don't kn…
97	Trump on Florida shooting: Classmates, neighbors should have reported gunman Nikolas Cruz	anonymous-source/all_shooting_images_newest/10550.jpg	[{'emotion': 'Sadness', 'intensity': '3', 'reason': 'This is preformative'}, {'emotion': 'Fear', 'intensity': '3', 'reason': 'The gunshot is happening everywhere, even in the neighbor.'}, {'emotion': 'Sadness', 'intensity': '3', 'reason': 'I think that he is right in this case but it makes me sad that people do this.'}, {'emotion': 'Disgust', 'intensity': '3', 'reason': 'Trump is really misdirect…	[{'emotion': 'Sadness', 'intensity': '3', 'reason': 'Accompanied by gun violence, casualties will inevitably result.'}, {'emotion': 'Awe', 'intensity': '4', 'reason': 'something bad might have happened to them '}, {'emotion': 'Sadness', 'intensity': '4', 'reason': 'it reminds me of gun violence tragedies and makes me sad because no one should have to go through this kind of pain'}, {'emotion': 'S…	[{'emotion': 'Fear', 'intensity': '4', 'reason': 'everyone should protect themselves well ', 'url': 'anonymous-source/all_shooting_images_newest/10550.jpg'}, {'emotion': 'Contentment', 'intensity': '4', 'reason': 'this is the bare minimum once again. He should have been reported. ', 'url': 'anonymous-source/all_shooting_images_newest/10550.jpg'}, {'emotion': 'Sadness', 'intensity': '3', 'reason':…
98	Angry over diversity in children's show, NRA TV depicts 'Thomas & Friends' in KKK hoods	anonymous-source/all_shooting_images_newest/90469.jpg	[{'emotion': 'Awe', 'intensity': '1', 'reason': 'What is the point?'}, {'emotion': 'Excitement', 'intensity': '1', 'reason': "not sure what's happening actually"}, {'emotion': 'Disgust', 'intensity': '3', 'reason': 'there is no reason to use KKK hoods. It stands for hate.'}, {'emotion': 'Disgust', 'intensity': '3', 'reason': 'it just shows the NRA is blatantly racist'}, {'emotion': 'Disgust', 'in…	[{'emotion': 'Contentment', 'intensity': '3', 'reason': 'More and more people are aware of the dangers of gun violence.'}, {'emotion': 'Excitement', 'intensity': '3', 'reason': 'this seems to help solve the problem'}, {'emotion': 'Disgust', 'intensity': '1', 'reason': "I don't know who this is but she looks like she supports guns"}, {'emotion': 'Contentment', 'intensity': '1', 'reason': 'this pho…	[{'emotion': 'Excitement', 'intensity': '1', 'reason': 'not very sure what this news is about', 'url': 'anonymous-source/all_shooting_images_newest/90469.jpg'}, {'emotion': 'Anger', 'intensity': '4', 'reason': 'it makes me question their thought process. ', 'url': 'anonymous-source/all_shooting_images_newest/90469.jpg'}, {'emotion': 'Sadness', 'intensity': '3', 'reason': "Don't know enough to ans…
99	Opinion | Schools Can Keep Kids Safe Without Giving Their Teachers Guns	anonymous-source/all_shooting_images_newest/90388.jpg	[{'emotion': 'Amusement', 'intensity': '3', 'reason': 'Because it is true'}, {'emotion': 'Excitement', 'intensity': '3', 'reason': 'exact the same opinion as mine'}, {'emotion': 'Contentment', 'intensity': '3', 'reason': 'I agree. I think this action would be unnecessary. '}, {'emotion': 'Contentment', 'intensity': '4', 'reason': 'i agree'}, {'emotion': 'Contentment', 'intensity': '3', 'reason': …	[{'emotion': 'Sadness', 'intensity': '3', 'reason': 'With the proliferation of guns, no place is safe'}, {'emotion': 'Awe', 'intensity': '4', 'reason': 'this poster is well designed'}, {'emotion': 'Sadness', 'intensity': '1', 'reason': "I don't understand this image but since it has a school and some guns it makes me sad those two things should not go together"}, {'emotion': 'Contentment', 'inten…	[{'emotion': 'Contentment', 'intensity': '3', 'reason': 'It is hard to tell whether it is good for teachers to have guns, but at least shools must have ways to protect students and teachers from gun violance', 'url': 'anonymous-source/all_shooting_images_newest/90388.jpg'}, {'emotion': 'Contentment', 'intensity': '3', 'reason': 'I agree with the statement. ', 'url': 'anonymous-source/all_shooting…
100	College instructor creates Second Amendment zone to segregate gun carriers it doesn t go over well	anonymous-source/all_shooting_images_newest/411.jpg	[{'emotion': 'Excitement', 'intensity': '2', 'reason': 'Good news for me'}, {'emotion': 'Sadness', 'intensity': '2', 'reason': 'I want gun problem to be solved one day. '}, {'emotion': 'Sadness', 'intensity': '4', 'reason': 'A good improvement will be done but no one support.'}, {'emotion': 'Sadness', 'intensity': '3', 'reason': "It's upsetting that the country is so divided and that college stud…	[{'emotion': 'Fear', 'intensity': '3', 'reason': 'A trebuchet'}, {'emotion': 'Anger', 'intensity': '3', 'reason': 'this makes me mad because people like these are the reason that shootings happen'}, {'emotion': 'Disgust', 'intensity': '2', 'reason': 'I feel like people think that owning guns are really cool which is not true'}, {'emotion': 'Fear', 'intensity': '3', 'reason': 'Accompanied by gun v…	[{'emotion': 'Fear', 'intensity': '3', 'reason': 'The picture is scary. The outcome of the instruction is also disappinting.', 'url': 'anonymous-source/all_shooting_images_newest/411.jpg'}, {'emotion': 'Sadness', 'intensity': '3', 'reason': 'anywhere guns are involved that hurt people it is sad', 'url': 'anonymous-source/all_shooting_images_newest/411.jpg'}, {'emotion': 'Contentment', 'intensity'…
101	Trump Briefly Responds To Santa Fe School Shooting Before Pivoting	anonymous-source/all_shooting_images_newest/10120.jpg	[{'emotion': 'Excitement', 'intensity': '3', 'reason': 'looking forward to hearing good news'}, {'emotion': 'Excitement', 'intensity': '3', 'reason': "this title doesn't show precise information such as what Trump exactly say and his attitude towards this event. "}, {'emotion': 'Sadness', 'intensity': '3', 'reason': "people in high position don't care much about their citizens."}, {'emotion': 'An…	[{'emotion': 'Anger', 'intensity': '3', 'reason': 'bad thing'}, {'emotion': 'Disgust', 'intensity': '3', 'reason': 'I do not like him'}, {'emotion': 'Disgust', 'intensity': '2', 'reason': 'when I think of gun control, I think of Donald trump in some ways'}, {'emotion': 'Excitement', 'intensity': '3', 'reason': 'More and more people are aware of the dangers of gun violence.'}, {'emotion': 'Disgust…	[{'emotion': 'Disgust', 'intensity': '5', 'reason': 'The picture is uncomfortable to look and everything Trump did is disgusting.', 'url': 'anonymous-source/all_shooting_images_newest/10120.jpg'}, {'emotion': 'Disgust', 'intensity': '3', 'reason': 'trump wont say anything that doesnt disgust me', 'url': 'anonymous-source/all_shooting_images_newest/10120.jpg'}, {'emotion': 'Disgust', 'intensity': …
102	Betsy DeVos s reported guns-in-schools plan would make schools less safe	anonymous-source/all_shooting_images_newest/17.jpg	[{'emotion': 'Fear', 'intensity': '4', 'reason': 'not good news for students'}, {'emotion': 'Sadness', 'intensity': '3', 'reason': "I don't want schools to be troubled with gun problems, but it was troubled I thought. "}, {'emotion': 'Awe', 'intensity': '3', 'reason': "It's is very true and I'am glad someone speak it out."}, {'emotion': 'Sadness', 'intensity': '3', 'reason': "It's sad that gun vi…	[{'emotion': 'Awe', 'intensity': '3', 'reason': 'smile'}, {'emotion': 'Disgust', 'intensity': '3', 'reason': 'i do not like her '}, {'emotion': 'Awe', 'intensity': '4', 'reason': 'finally there are someone willing to take over this topic'}, {'emotion': 'Contentment', 'intensity': '3', 'reason': 'More and more people are aware of the dangers of gun violence.'}, {'emotion': 'Contentment', 'intensit…	[{'emotion': 'Contentment', 'intensity': '3', 'reason': "Agree with what she said and finally there's someone who has a clear mind.", 'url': 'anonymous-source/all_shooting_images_newest/17.jpg'}, {'emotion': 'Sadness', 'intensity': '3', 'reason': 'guns wont be banned and thats sad', 'url': 'anonymous-source/all_shooting_images_newest/17.jpg'}, {'emotion': 'Fear', 'intensity': '3', 'reason': 'I fe…
103	Kellyanne Conway suggests 'late-night comedians' promoting 'anti-religiosity' to blame for synagogue shooting, and Twitter's not having it	anonymous-source/all_shooting_images_newest/100459.jpg	[{'emotion': 'Sadness', 'intensity': '1', 'reason': 'actually no special feelings'}, {'emotion': 'Fear', 'intensity': '3', 'reason': 'I feel like gun problems can happen in different areas. '}, {'emotion': 'Disgust', 'intensity': '3', 'reason': 'I suspect that it is just an excuse from the company or the truth did happen. '}, {'emotion': 'Amusement', 'intensity': '4', 'reason': "It's annoying tha…	[{'emotion': 'Contentment', 'intensity': '3', 'reason': 'report'}, {'emotion': 'Disgust', 'intensity': '4', 'reason': 'I do not like her '}, {'emotion': 'Fear', 'intensity': '3', 'reason': 'I dont know what is the connection between this pic and gun violence'}, {'emotion': 'Excitement', 'intensity': '3', 'reason': 'More and more people are aware of the dangers of gun violence.'}, {'emotion': 'Sad…	[{'emotion': 'Anger', 'intensity': '3', 'reason': 'It makes me angry to see how people are finding unreasonable excuses for these shootings.', 'url': 'anonymous-source/all_shooting_images_newest/100459.jpg'}, {'emotion': 'Disgust', 'intensity': '3', 'reason': 'shes dumb and doesnt say anything true', 'url': 'anonymous-source/all_shooting_images_newest/100459.jpg'}, {'emotion': 'Sadness', 'intensi…
104	Gun manufacturer waited months to warn the public its pistol could fire when dropped	anonymous-source/all_shooting_images_newest/10354.jpg	[{'emotion': 'Fear', 'intensity': '3', 'reason': 'actually no special feelings'}, {'emotion': 'Fear', 'intensity': '4', 'reason': 'a lot of people would be exposed to life danger without noticing it. '}, {'emotion': 'Fear', 'intensity': '3', 'reason': 'The gun sounds so dangerous'}, {'emotion': 'Anger', 'intensity': '3', 'reason': "that's very dangerous and puts so many people in danger to not wa…	[{'emotion': 'Fear', 'intensity': '3', 'reason': 'A trebuchet'}, {'emotion': 'Disgust', 'intensity': '1', 'reason': "I don't know the purpose of this photo but it can't be good "}, {'emotion': 'Fear', 'intensity': '4', 'reason': 'this pic gives me a more vivd pic of what gun violence is like '}, {'emotion': 'Disgust', 'intensity': '3', 'reason': 'I hope not to sell guns.'}, {'emotion': 'Fear', 'i…	[{'emotion': 'Anger', 'intensity': '3', 'reason': "Very irresponsible for them to do so. They're not just some normal manufacturers, they have to realize that they are creating weapons.", 'url': 'anonymous-source/all_shooting_images_newest/10354.jpg'}, {'emotion': 'Sadness', 'intensity': '3', 'reason': 'this is something that needed to have been disclosed beforehand', 'url': 'anonymous-source/all…
105	Trump backs effort to improve gun background checks	anonymous-source/all_shooting_images_newest/10106.jpg	[{'emotion': 'Excitement', 'intensity': '2', 'reason': 'actually no special feelings'}, {'emotion': 'Excitement', 'intensity': '4', 'reason': 'it shows that the government is paying more attention to gun problems. '}, {'emotion': 'Contentment', 'intensity': '3', 'reason': 'Gun backgrounds should be check as soon as possible'}, {'emotion': 'Awe', 'intensity': '3', 'reason': "I'm very surprised tha…	[{'emotion': 'Sadness', 'intensity': '3', 'reason': 'crying'}, {'emotion': 'Sadness', 'intensity': '2', 'reason': 'i feel bad for her and everything that she went through '}, {'emotion': 'Sadness', 'intensity': '4', 'reason': "gun violence did take away lot of people's life "}, {'emotion': 'Anger', 'intensity': '3', 'reason': 'Accompanied by gun violence, casualties will inevitably result.'}, {'e…	[{'emotion': 'Contentment', 'intensity': '3', 'reason': "He's finally doing something.", 'url': 'anonymous-source/all_shooting_images_newest/10106.jpg'}, {'emotion': 'Contentment', 'intensity': '3', 'reason': 'something is being done', 'url': 'anonymous-source/all_shooting_images_newest/10106.jpg'}, {'emotion': 'Contentment', 'intensity': '3', 'reason': 'Trump is finally doing something right.', …
106	Las Vegas Shooting: Retired Carpenter Builds New Memorial of 58 Crosses Ahead of Anniversary	anonymous-source/all_shooting_images_newest/90220.jpg	[{'emotion': 'Excitement', 'intensity': '1', 'reason': 'actually no special feelings'}, {'emotion': 'Sadness', 'intensity': '3', 'reason': 'so many people were killed by guns.'}, {'emotion': 'Fear', 'intensity': '3', 'reason': 'there is shooting event'}, {'emotion': 'Sadness', 'intensity': '4', 'reason': "It's so sad that 58 innocent people died because of a tragic mass shooting."}, {'emotion': '…	[{'emotion': 'Sadness', 'intensity': '3', 'reason': 'respect'}, {'emotion': 'Sadness', 'intensity': '1', 'reason': 'it makes me sad to see all of those crosses'}, {'emotion': 'Sadness', 'intensity': '4', 'reason': "gun violence did take away lot of people's life "}, {'emotion': 'Sadness', 'intensity': '3', 'reason': 'Accompanied by gun violence, casualties will inevitably result.'}, {'emotion': '…	[{'emotion': 'Sadness', 'intensity': '3', 'reason': 'Pure tragedy to see this.', 'url': 'anonymous-source/all_shooting_images_newest/90220.jpg'}, {'emotion': 'Awe', 'intensity': '3', 'reason': 'amazing that he did that', 'url': 'anonymous-source/all_shooting_images_newest/90220.jpg'}, {'emotion': 'Sadness', 'intensity': '3', 'reason': 'I feel really sad to see that many crosses. ', 'url': 'anonym…
107	After California shooting, Democrats vow to tackle gun violence | Fox News	anonymous-source/all_shooting_images_newest/110511.jpg	[{'emotion': 'Amusement', 'intensity': '4', 'reason': 'good news to know'}, {'emotion': 'Excitement', 'intensity': '3', 'reason': 'there is a chance that the gun problem can be solved. '}, {'emotion': 'Awe', 'intensity': '3', 'reason': 'It is a must to control the gun use better than before'}, {'emotion': 'Anger', 'intensity': '3', 'reason': "I'm annoyed that Fox is passive aggressively coming at…	[{'emotion': 'Fear', 'intensity': '3', 'reason': 'The scene of the accident'}, {'emotion': 'Fear', 'intensity': '1', 'reason': 'it scares me because it looks like something horrible is going on and if were to show up on the news then i would be very concerned. '}, {'emotion': 'Fear', 'intensity': '4', 'reason': 'this makes me feel like gun violence do exists in our life'}, {'emotion': 'Anger', 'i…	[{'emotion': 'Anger', 'intensity': '3', 'reason': 'Legislators always have to wait for real harm to happen before trying to solve the problem', 'url': 'anonymous-source/all_shooting_images_newest/110511.jpg'}, {'emotion': 'Sadness', 'intensity': '3', 'reason': 'lives were lost', 'url': 'anonymous-source/all_shooting_images_newest/110511.jpg'}, {'emotion': 'Contentment', 'intensity': '3', 'reason'…
108	Country singers usually stay quiet about gun issues, but since Parkland, some are speaking out	anonymous-source/all_shooting_images_newest/10370.jpg	[{'emotion': 'Amusement', 'intensity': '4', 'reason': 'good news'}, {'emotion': 'Excitement', 'intensity': '3', 'reason': 'more and more people and celebrities put concerns on the gun problem. '}, {'emotion': 'Awe', 'intensity': '4', 'reason': 'Sometimes it is hard to speak out but Parkland did it'}, {'emotion': 'Contentment', 'intensity': '4', 'reason': 'It makes me happy that some people are sp…	[{'emotion': 'Sadness', 'intensity': '3', 'reason': 'sad emotion'}, {'emotion': 'Contentment', 'intensity': '1', 'reason': "i don't know who he is, but nothing about this concerns me "}, {'emotion': 'Anger', 'intensity': '4', 'reason': 'this pic makes me feel like they are encouraging gun violence'}, {'emotion': 'Sadness', 'intensity': '3', 'reason': 'Accompanied by gun violence, casualties will …	[{'emotion': 'Anger', 'intensity': '3', 'reason': 'This title makes me feel that many singers are forced to stand up and speak up.', 'url': 'anonymous-source/all_shooting_images_newest/10370.jpg'}, {'emotion': 'Sadness', 'intensity': '3', 'reason': 'that people even need to speak out about it', 'url': 'anonymous-source/all_shooting_images_newest/10370.jpg'}, {'emotion': 'Awe', 'intensity': '3', '…
109	Oak Park Township voters overwhelmingly support firearm storage referendum	anonymous-source/all_shooting_images_newest/110231.jpg	[{'emotion': 'Fear', 'intensity': '1', 'reason': 'actually no special feelings'}, {'emotion': 'Fear', 'intensity': '3', 'reason': 'so many people support gun storage. '}, {'emotion': 'Amusement', 'intensity': '3', 'reason': "I'm confused about the reason why people support the storage of firearm, as it is insecure though."}, {'emotion': 'Contentment', 'intensity': '4', 'reason': 'It makes me happ…	[{'emotion': 'Contentment', 'intensity': '3', 'reason': 'right to vote'}, {'emotion': 'Contentment', 'intensity': '2', 'reason': 'i have a positive view on voting and believe that it will be our best bet to tackling gun violence '}, {'emotion': 'Disgust', 'intensity': '3', 'reason': 'I feel like this is just a political campaign '}, {'emotion': 'Contentment', 'intensity': '3', 'reason': 'More and…	[{'emotion': 'Contentment', 'intensity': '3', 'reason': 'It can be seen that everyone agrees on the issue of guns, and they are already taking action to better manage guns.', 'url': 'anonymous-source/all_shooting_images_newest/110231.jpg'}, {'emotion': 'Sadness', 'intensity': '3', 'reason': 'sad that peoples lives were lost leading to this', 'url': 'anonymous-source/all_shooting_images_newest/110…
110	3D-Printed Guns Are Unchecked and Untraceable. And a Judge Blocked Them at the Last Minute	anonymous-source/all_shooting_images_newest/417.jpg	[{'emotion': 'Awe', 'intensity': '1', 'reason': 'actually no special feelings'}, {'emotion': 'Excitement', 'intensity': '3', 'reason': "it saves a lot of people's lives probably. "}, {'emotion': 'Fear', 'intensity': '3', 'reason': 'The unchecked guns are absolutely insecure.'}, {'emotion': 'Fear', 'intensity': '4', 'reason': "It's scary that guns can be 3D printed, and be untracable and it was a …	[{'emotion': 'Fear', 'intensity': '3', 'reason': 'A trebuchet'}, {'emotion': 'Disgust', 'intensity': '1', 'reason': "I don't know who he is or what is going on but something about him disgusts me "}, {'emotion': 'Fear', 'intensity': '4', 'reason': 'the background is our everyday life feels more real'}, {'emotion': 'Disgust', 'intensity': '3', 'reason': 'Accompanied by gun violence, casualties wil…	[{'emotion': 'Contentment', 'intensity': '3', 'reason': 'Really glad to see these 3D printed guns are blocked.', 'url': 'anonymous-source/all_shooting_images_newest/417.jpg'}, {'emotion': 'Contentment', 'intensity': '3', 'reason': 'guns are scary and untraceable ones are worse', 'url': 'anonymous-source/all_shooting_images_newest/417.jpg'}, {'emotion': 'Contentment', 'intensity': '3', 'reason': '…
111	Gun violence has defined Sen. Dianne Feinstein's career. The issue is more important than ever for her now	anonymous-source/all_shooting_images_newest/10125.jpg	[{'emotion': 'Excitement', 'intensity': '2', 'reason': 'actually no special feelings'}, {'emotion': 'Sadness', 'intensity': '1', 'reason': 'not pretty sure what this news is talking about. '}, {'emotion': 'Awe', 'intensity': '4', 'reason': 'Though Sen.Dianne is restricted in gun violence issue, she may put all her effort into one issue, so she are more likely to help solve it out.'}, {'emotion': …	[{'emotion': 'Fear', 'intensity': '3', 'reason': 'black and white'}, {'emotion': 'Fear', 'intensity': '1', 'reason': "I don't know what is going on but everyone looks scared "}, {'emotion': 'Disgust', 'intensity': '4', 'reason': "it's more abt political manipulation "}, {'emotion': 'Excitement', 'intensity': '3', 'reason': 'More and more people are aware of the dangers of gun violence.'}, {'emoti…	[{'emotion': 'Contentment', 'intensity': '3', 'reason': "It's happy to see some politicians are keep doing something to change the situation.", 'url': 'anonymous-source/all_shooting_images_newest/10125.jpg'}, {'emotion': 'Sadness', 'intensity': '3', 'reason': 'that guns were an. issue for that liong', 'url': 'anonymous-source/all_shooting_images_newest/10125.jpg'}, {'emotion': 'Awe', 'intensity':…
112	'We are a better city': Emotional mayor decries Chicago gun violence	anonymous-source/all_shooting_images_newest/19.jpg	[{'emotion': 'Amusement', 'intensity': '5', 'reason': 'good news for peaceful World '}, {'emotion': 'Excitement', 'intensity': '3', 'reason': 'the government is paying more attention on gun problem and wants to build a safer society. '}, {'emotion': 'Contentment', 'intensity': '3', 'reason': 'It is a must to decry over those violent events.'}, {'emotion': 'Contentment', 'intensity': '4', 'reason'…	[{'emotion': 'Excitement', 'intensity': '3', 'reason': 'news'}, {'emotion': 'Anger', 'intensity': '1', 'reason': "it makes me feel like something bad has happened and i'm not going to like it "}, {'emotion': 'Sadness', 'intensity': '3', 'reason': 'feels like something happened'}, {'emotion': 'Excitement', 'intensity': '3', 'reason': 'More and more people are aware of the dangers of gun violence.'…	[{'emotion': 'Sadness', 'intensity': '3', 'reason': "It's sad to see how people react to these tragedies but can't change the situation.", 'url': 'anonymous-source/all_shooting_images_newest/19.jpg'}, {'emotion': 'Sadness', 'intensity': '3', 'reason': 'lives werre lost', 'url': 'anonymous-source/all_shooting_images_newest/19.jpg'}, {'emotion': 'Sadness', 'intensity': '3', 'reason': 'What he said …
113	White male 'gun nuts' are 'biggest terrorist organization on the planet,' Tennessee Dem ally wrote online: report	anonymous-source/all_shooting_images_newest/100461.jpg	[{'emotion': 'Contentment', 'intensity': '4', 'reason': 'no special feelings'}, {'emotion': 'Fear', 'intensity': '3', 'reason': 'some people may have guns just for fun and supreme. '}, {'emotion': 'Fear', 'intensity': '4', 'reason': "'gun nuts' are hard to change, so there should have a lot remaining issue over gun violence in the country."}, {'emotion': 'Sadness', 'intensity': '2', 'reason': 'th…	[{'emotion': 'Sadness', 'intensity': '4', 'reason': 'The victim'}, {'emotion': 'Contentment', 'intensity': '1', 'reason': "I don't know who that is or the context of this"}, {'emotion': 'Fear', 'intensity': '3', 'reason': '/'}, {'emotion': 'Sadness', 'intensity': '3', 'reason': 'Accompanied by gun violence, casualties will inevitably result.'}, {'emotion': 'Fear', 'intensity': '1', 'reason': 'it …	[{'emotion': 'Fear', 'intensity': '3', 'reason': 'Totally agree with the headline and feel angry with these gun nuts.', 'url': 'anonymous-source/all_shooting_images_newest/100461.jpg'}, {'emotion': 'Disgust', 'intensity': '3', 'reason': 'thats just wrong', 'url': 'anonymous-source/all_shooting_images_newest/100461.jpg'}, {'emotion': 'Sadness', 'intensity': '3', 'reason': 'People judge each other …
114	Top Senate Dem admits: No gun control law would have stopped Santa Fe massacre	anonymous-source/all_shooting_images_newest/10385.jpg	[{'emotion': 'Anger', 'intensity': '3', 'reason': 'no special feelings'}, {'emotion': 'Sadness', 'intensity': '3', 'reason': "there's no law can stop gun problem. "}, {'emotion': 'Fear', 'intensity': '5', 'reason': 'No law works means people over Santa Fe will be exposed to violence, which are strict to people living there.'}, {'emotion': 'Fear', 'intensity': '3', 'reason': "Its very scary that e…	[{'emotion': 'Fear', 'intensity': '4', 'reason': 'A trebuchet'}, {'emotion': 'Disgust', 'intensity': '3', 'reason': 'There is no need for civilians to have assault rifles '}, {'emotion': 'Fear', 'intensity': '4', 'reason': 'this is more like terrorism instead of gun violence'}, {'emotion': 'Disgust', 'intensity': '5', 'reason': 'I hope not to sell guns.'}, {'emotion': 'Fear', 'intensity': '3', 'r…	[{'emotion': 'Sadness', 'intensity': '3', 'reason': 'Sad that the politician said something like this which adds the anxiety of the public.', 'url': 'anonymous-source/all_shooting_images_newest/10385.jpg'}, {'emotion': 'Sadness', 'intensity': '3', 'reason': 'not true', 'url': 'anonymous-source/all_shooting_images_newest/10385.jpg'}, {'emotion': 'Anger', 'intensity': '3', 'reason': 'If there is a …
115	What students need to do to get more gun-control laws passed: Keep the media's attention	anonymous-source/all_shooting_images_newest/10113.jpg	[{'emotion': 'Excitement', 'intensity': '5', 'reason': 'agreed'}, {'emotion': 'Excitement', 'intensity': '3', 'reason': "as a student myself, I'm happy to learn what can I do to get more gun-control. "}, {'emotion': 'Amusement', 'intensity': '3', 'reason': "I think only keep the media's attention is not enough."}, {'emotion': 'Disgust', 'intensity': '4', 'reason': "It's so upsetting that student …	[{'emotion': 'Sadness', 'intensity': '3', 'reason': 'unity'}, {'emotion': 'Sadness', 'intensity': '1', 'reason': "I'm sad that literal children feel the need to protest gun violence and I feel bad for them "}, {'emotion': 'Contentment', 'intensity': '4', 'reason': 'gun violence is a big thing in school '}, {'emotion': 'Excitement', 'intensity': '4', 'reason': 'More and more people are aware of th…	[{'emotion': 'Excitement', 'intensity': '3', 'reason': "Students are always the most outspoken group when it comes to social issues. And it's smart for them to rely on the power of media.", 'url': 'anonymous-source/all_shooting_images_newest/10113.jpg'}, {'emotion': 'Sadness', 'intensity': '3', 'reason': 'that kids were effected by gun violence', 'url': 'anonymous-source/all_shooting_images_newes…
116	The Latest: Victim's family marks anniversary of shooting	anonymous-source/all_shooting_images_newest/90248.jpg	[{'emotion': 'Sadness', 'intensity': '3', 'reason': "feel sad about victim's family"}, {'emotion': 'Sadness', 'intensity': '3', 'reason': 'just sad about those people who lost family memebers due to gun shot. '}, {'emotion': 'Sadness', 'intensity': '3', 'reason': 'The anniversary sounds ironic, which make me feel pity on what the family has experienced.'}, {'emotion': 'Sadness', 'intensity': '3',…	[{'emotion': 'Sadness', 'intensity': '3', 'reason': 'stay strong'}, {'emotion': 'Contentment', 'intensity': '2', 'reason': 'this is sweet and it makes me feel good that they did this '}, {'emotion': 'Contentment', 'intensity': '4', 'reason': "finally there's someone or some organization and handle this topic and maybe make some changes in the future"}, {'emotion': 'Contentment', 'intensity': '3',…	[{'emotion': 'Sadness', 'intensity': '4', 'reason': 'To feel sorry for those who died innocently, only family members will remember them forever and the pain will not go away.', 'url': 'anonymous-source/all_shooting_images_newest/90248.jpg'}, {'emotion': 'Sadness', 'intensity': '3', 'reason': 'that children were the victium of gun shooting', 'url': 'anonymous-source/all_shooting_images_newest/902…
117	Florida Yoga Studio Shooting Suspect Was A Far-Right Misogynist	anonymous-source/all_shooting_images_newest/110513.jpg	[{'emotion': 'Anger', 'intensity': '3', 'reason': 'not very strong feelings'}, {'emotion': 'Anger', 'intensity': '3', 'reason': 'people would hurt others just because they are lunatics. '}, {'emotion': 'Sadness', 'intensity': '3', 'reason': 'I feel pity about the victims in the shooting events.'}, {'emotion': 'Anger', 'intensity': '5', 'reason': "I think that it's crazy that people are still sexi…	[{'emotion': 'Fear', 'intensity': '3', 'reason': 'The scene of the accident'}, {'emotion': 'Fear', 'intensity': '3', 'reason': "this looks like a scary situation and in this context it makes me feel like something really bad happened but i'm not sure what so i'm scared"}, {'emotion': 'Fear', 'intensity': '2', 'reason': 'something might happened '}, {'emotion': 'Fear', 'intensity': '3', 'reason': …	[{'emotion': 'Disgust', 'intensity': '5', 'reason': 'Disgusted by what these misogynistic men do, they don’t have any sympathy for humans, it’s very pathetic.', 'url': 'anonymous-source/all_shooting_images_newest/110513.jpg'}, {'emotion': 'Disgust', 'intensity': '3', 'reason': 'someone took lives', 'url': 'anonymous-source/all_shooting_images_newest/110513.jpg'}, {'emotion': 'Fear', 'intensity': …
118	MSNBC's Ruhle to Rubio: 'Step up and be a human' on gun control	anonymous-source/all_shooting_images_newest/10373.jpg	[{'emotion': 'Excitement', 'intensity': '4', 'reason': "good to know that because I'm agree with him"}, {'emotion': 'Excitement', 'intensity': '3', 'reason': "I'm excited because someone must stand out to solve this problem. "}, {'emotion': 'Awe', 'intensity': '3', 'reason': "It is everyone's responsibility to help make the world safer."}, {'emotion': 'Contentment', 'intensity': '3', 'reason': "I…	[{'emotion': 'Contentment', 'intensity': '3', 'reason': 'news'}, {'emotion': 'Sadness', 'intensity': '1', 'reason': 'I feel like she could be delivering bad news '}, {'emotion': 'Fear', 'intensity': '3', 'reason': 'I dont know what is the connection between this pic and gun violence'}, {'emotion': 'Contentment', 'intensity': '3', 'reason': 'More and more people are aware of the dangers of gun vio…	[{'emotion': 'Contentment', 'intensity': '5', 'reason': "It's brave for her to say something like this in a live broadcast.", 'url': 'anonymous-source/all_shooting_images_newest/10373.jpg'}, {'emotion': 'Contentment', 'intensity': '3', 'reason': 'she is right', 'url': 'anonymous-source/all_shooting_images_newest/10373.jpg'}, {'emotion': 'Awe', 'intensity': '3', 'reason': 'She is very brave to say…
119	Tamera Mowry Calls for Gun Control on 'The Real' After Niece Died in Thousand Oaks Shooting	anonymous-source/all_shooting_images_newest/110249.jpg	[{'emotion': 'Sadness', 'intensity': '3', 'reason': 'sorry about the loss first, then feel angry about the violence'}, {'emotion': 'Sadness', 'intensity': '3', 'reason': 'For one more people died from a gunshot, and hope this can bring some changes. '}, {'emotion': 'Contentment', 'intensity': '4', 'reason': 'It is a must to reduce the trauma in the country. Peace should be welcomed instead.'}, {'…	[{'emotion': 'Excitement', 'intensity': '3', 'reason': 'past'}, {'emotion': 'Contentment', 'intensity': '1', 'reason': "i don't really know what's going on in this photo but nothing is worrying me about it"}, {'emotion': 'Fear', 'intensity': '3', 'reason': 'I dont know what is the connection between this pic and gun violence '}, {'emotion': 'Disgust', 'intensity': '3', 'reason': 'I hope not to se…	[{'emotion': 'Contentment', 'intensity': '3', 'reason': 'People are pointing out the key problem of gun violence: real control never happened.', 'url': 'anonymous-source/all_shooting_images_newest/110249.jpg'}, {'emotion': 'Sadness', 'intensity': '3', 'reason': 'sad because lives were lost', 'url': 'anonymous-source/all_shooting_images_newest/110249.jpg'}, {'emotion': 'Awe', 'intensity': '3', 're…
120	Suspect In Fatal Kroger Shooting First Tried To Get Inside Black Church: Police	anonymous-source/all_shooting_images_newest/100083.jpg	[{'emotion': 'Fear', 'intensity': '3', 'reason': '.'}, {'emotion': 'Fear', 'intensity': '3', 'reason': "Because he had attempted first to go somewhere that is supposed to be a safe place of worship, it also implies his actions were racially motivated, which is disgusting and a reminder that racism is still very much present in today's America. "}, {'emotion': 'Excitement', 'intensity': '3', 'reas…	[{'emotion': 'Fear', 'intensity': '4', 'reason': 'Rich facial expression '}, {'emotion': 'Fear', 'intensity': '3', 'reason': 'He looks so terrifying'}, {'emotion': 'Fear', 'intensity': '5', 'reason': 'im scared of the look on his face he looks dangerous'}, {'emotion': 'Fear', 'intensity': '3', 'reason': "I don't who this guy is but he looks guilty"}, {'emotion': 'Contentment', 'intensity': '3', '…	[{'emotion': 'Anger', 'intensity': '2', 'reason': 'He might be motivated by racism', 'url': 'anonymous-source/all_shooting_images_newest/100083.jpg'}, {'emotion': 'Disgust', 'intensity': '3', 'reason': 'sad', 'url': 'anonymous-source/all_shooting_images_newest/100083.jpg'}, {'emotion': 'Fear', 'intensity': '5', 'reason': 'It’s scary to think that someone can just walk into a place and decide to e…
121	Aurora cross man gets helping hearts from Covenant students for Las Vegas shooting anniversary trip	anonymous-source/all_shooting_images_newest/100103.jpg	[{'emotion': 'Contentment', 'intensity': '3', 'reason': '.'}, {'emotion': 'Amusement', 'intensity': '3', 'reason': 'It is nice to see people come together, but once again, it is hard for me to express contentment or excitement over events that have such a tragic and horrific effect on the community.'}, {'emotion': 'Fear', 'intensity': '3', 'reason': '1'}, {'emotion': 'Sadness', 'intensity': '4', …	[{'emotion': 'Sadness', 'intensity': '2', 'reason': 'Feeling of empathy '}, {'emotion': 'Sadness', 'intensity': '3', 'reason': 'it makes me so sad to see this heart'}, {'emotion': 'Sadness', 'intensity': '4', 'reason': 'the sadness of mourning a loved one is the most painful experience'}, {'emotion': 'Sadness', 'intensity': '4', 'reason': 'I would assume he lost his child/a loved one to gun viole…	[{'emotion': 'Excitement', 'intensity': '4', 'reason': 'It is nice to see a kind act being done nowadays', 'url': 'anonymous-source/all_shooting_images_newest/100103.jpg'}, {'emotion': 'Sadness', 'intensity': '3', 'reason': 'sad', 'url': 'anonymous-source/all_shooting_images_newest/100103.jpg'}, {'emotion': 'Awe', 'intensity': '4', 'reason': 'It’s nice to hear what students did, but it’s sad to r…
122	Bucking the NRA, Florida governor signs landmark gun control legislation	anonymous-source/all_shooting_images_newest/10588.jpg	[{'emotion': 'Contentment', 'intensity': '3', 'reason': '.'}, {'emotion': 'Contentment', 'intensity': '3', 'reason': 'seeing the governor finally decide to allocate money to something that is worth keeping the children and community of his state safe gives me hope, especially since Florida is usually out of wack when it comes to gun control. '}, {'emotion': 'Disgust', 'intensity': '3', 'reason': …	[{'emotion': 'Excitement', 'intensity': '3', 'reason': 'Feeling of secure '}, {'emotion': 'Amusement', 'intensity': '1', 'reason': 'who is he?'}, {'emotion': 'Anger', 'intensity': '3', 'reason': 'more needs to be done about gun violence'}, {'emotion': 'Anger', 'intensity': '4', 'reason': "I have a general resentment towards politicians because they say they're for the people but most of them don'…	[{'emotion': 'Excitement', 'intensity': '3', 'reason': "It's good to see lawmakers stand up for gun control", 'url': 'anonymous-source/all_shooting_images_newest/10588.jpg'}, {'emotion': 'Anger', 'intensity': '3', 'reason': 'anger', 'url': 'anonymous-source/all_shooting_images_newest/10588.jpg'}, {'emotion': 'Fear', 'intensity': '3', 'reason': 'The possession of guns scare me because I think peop…
123	California bans gun sales to people under 21	anonymous-source/all_shooting_images_newest/90321.jpg	[{'emotion': 'Contentment', 'intensity': '3', 'reason': '.'}, {'emotion': 'Contentment', 'intensity': '3', 'reason': 'seeing how many suspects of school shooting are so young, it gives me hope that this rule will make somewhat of a difference in preventing tragedy '}, {'emotion': 'Sadness', 'intensity': '3', 'reason': '1'}, {'emotion': 'Excitement', 'intensity': '4', 'reason': 'they are doing wha…	[{'emotion': 'Excitement', 'intensity': '4', 'reason': 'Rich and positive facial expressions '}, {'emotion': 'Amusement', 'intensity': '1', 'reason': 'who is he?'}, {'emotion': 'Fear', 'intensity': '3', 'reason': 'he looks like hes yelling at people'}, {'emotion': 'Anger', 'intensity': '2', 'reason': 'Another straight white male politician '}, {'emotion': 'Contentment', 'intensity': '3', 'reason'…	[{'emotion': 'Contentment', 'intensity': '3', 'reason': 'I believe people under 21 should not be given firearms.', 'url': 'anonymous-source/all_shooting_images_newest/90321.jpg'}, {'emotion': 'Sadness', 'intensity': '3', 'reason': 'sad', 'url': 'anonymous-source/all_shooting_images_newest/90321.jpg'}, {'emotion': 'Anger', 'intensity': '3', 'reason': 'This statement makes me angry because this is …
124	President Trump praises Dixon officer who stopped school shooting suspect	anonymous-source/all_shooting_images_newest/100387.jpg	[{'emotion': 'Contentment', 'intensity': '3', 'reason': '.'}, {'emotion': 'Awe', 'intensity': '3', 'reason': 'I am glad the president recognized and praised this man for his thoughtful prevention however, he needs to acknowledge that we as a country cannot rely on people like this officer to stop school shootings and instead implement effective measures, laws and programs to prevent shooting long…	[{'emotion': 'Amusement', 'intensity': '3', 'reason': 'Feeling of serious problems was not seriously treated '}, {'emotion': 'Amusement', 'intensity': '1', 'reason': 'who is he?'}, {'emotion': 'Awe', 'intensity': '3', 'reason': 'policemen do a lot for this country '}, {'emotion': 'Contentment', 'intensity': '3', 'reason': "I don't like cops but he probably saved some lives"}, {'emotion': 'Anger',…	[{'emotion': 'Excitement', 'intensity': '3', 'reason': 'It shows that lawmakers care about stopping school shootings', 'url': 'anonymous-source/all_shooting_images_newest/100387.jpg'}, {'emotion': 'Fear', 'intensity': '3', 'reason': 'fear', 'url': 'anonymous-source/all_shooting_images_newest/100387.jpg'}, {'emotion': 'Contentment', 'intensity': '3', 'reason': 'It’s important for prevent shootings…
125	Opinion | I m Republican. I Appreciate Assault Weapons. And I Support a Ban.	anonymous-source/all_shooting_images_newest/10656.jpg	[{'emotion': 'Contentment', 'intensity': '3', 'reason': '.'}, {'emotion': 'Excitement', 'intensity': '3', 'reason': 'finally, someone who is on the side of things that typically supports these things can acknowledge how terribly necessary it is to regulate or ban assault weapons. It makes me hopeful that other republicans who appreciate and likely own assault weapons will be more likely to read s…	[{'emotion': 'Fear', 'intensity': '2', 'reason': 'Not much emotions raised '}, {'emotion': 'Fear', 'intensity': '5', 'reason': 'it gives me a sense of asphyxia'}, {'emotion': 'Disgust', 'intensity': '3', 'reason': 'it is so easy to get a gun anywhere'}, {'emotion': 'Sadness', 'intensity': '3', 'reason': 'Guns should not be sold in stores like every day items'}, {'emotion': 'Awe', 'intensity': '5'…	[{'emotion': 'Fear', 'intensity': '3', 'reason': "I'm not sure what he's trying to say", 'url': 'anonymous-source/all_shooting_images_newest/10656.jpg'}, {'emotion': 'Anger', 'intensity': '2', 'reason': 'happy', 'url': 'anonymous-source/all_shooting_images_newest/10656.jpg'}, {'emotion': 'Fear', 'intensity': '5', 'reason': 'This scares me because I personally don’t feel safe.', 'url': 'anonymous-…
126	Parkland Shooting Survivor Emma Gonzalez Calls Out Trump on Gun Control (Video)	anonymous-source/all_shooting_images_newest/10873.jpg	[{'emotion': 'Awe', 'intensity': '3', 'reason': '.'}, {'emotion': 'Contentment', 'intensity': '3', 'reason': "I am proud of this girl for making this video, I think anyone who has come that close to dying from a shooting has every right to be angry and motivated to directly address the person who has the capability and power to change things and doesn't. "}, {'emotion': 'Anger', 'intensity': '3',…	[{'emotion': 'Excitement', 'intensity': '4', 'reason': 'Sense of unity '}, {'emotion': 'Awe', 'intensity': '3', 'reason': 'She is brave'}, {'emotion': 'Excitement', 'intensity': '3', 'reason': 'people need to take more of a stand'}, {'emotion': 'Sadness', 'intensity': '3', 'reason': "Kids shouldn't have to lead the charge for these issues\r\n"}, {'emotion': 'Sadness', 'intensity': '3', 'reason': …	[{'emotion': 'Excitement', 'intensity': '3', 'reason': "It's good to see gun control activists and survivors given media time.", 'url': 'anonymous-source/all_shooting_images_newest/10873.jpg'}, {'emotion': 'Excitement', 'intensity': '3', 'reason': 'happy', 'url': 'anonymous-source/all_shooting_images_newest/10873.jpg'}, {'emotion': 'Awe', 'intensity': '5', 'reason': 'I’m amazed what the survivors…
127	Mom: Thanks to active-shooter drills at school, my 4-year-old thought fireworks were gunshots. Enough already.	anonymous-source/all_shooting_images_newest/110494.jpg	[{'emotion': 'Fear', 'intensity': '3', 'reason': '.'}, {'emotion': 'Sadness', 'intensity': '3', 'reason': 'seeing how this affects children at such a young age is so upsetting. Also as a parent knowing things like this do not happen to children who live in other countries makes me question my decision to raise. a family in America, somewhere I am supposed to be proud to call home'}, {'emotion': '…	[{'emotion': 'Sadness', 'intensity': '3', 'reason': 'Sense of empathy '}, {'emotion': 'Sadness', 'intensity': '3', 'reason': 'This world is beautiful because of most kind people'}, {'emotion': 'Sadness', 'intensity': '3', 'reason': 'people mourning is so painful'}, {'emotion': 'Sadness', 'intensity': '4', 'reason': 'She looks like she lost someone'}, {'emotion': 'Contentment', 'intensity': '3', '…	[{'emotion': 'Sadness', 'intensity': '3', 'reason': "I don't think 4 year olds should be worrying about school shootings from such a young age", 'url': 'anonymous-source/all_shooting_images_newest/110494.jpg'}, {'emotion': 'Contentment', 'intensity': '3', 'reason': 'fear', 'url': 'anonymous-source/all_shooting_images_newest/110494.jpg'}, {'emotion': 'Fear', 'intensity': '5', 'reason': 'It’s scary…
128	NRA Says it Is Facing a Financial Crisis, Twitter Users Send Thoughts & Prayers	anonymous-source/all_shooting_images_newest/44.jpg	[{'emotion': 'Fear', 'intensity': '3', 'reason': '.'}, {'emotion': 'Disgust', 'intensity': '3', 'reason': 'they are the last people that should be receiving any sort of funding, instead the funds should be directed to concrete plans and actionable programs toward gun ban or serious restriction policy. '}, {'emotion': 'Fear', 'intensity': '3', 'reason': 'for the crisis '}, {'emotion': 'Contentment…	[{'emotion': 'Excitement', 'intensity': '3', 'reason': 'Rich and positive facial expressions '}, {'emotion': 'Amusement', 'intensity': '3', 'reason': "I don't have some feeling with this"}, {'emotion': 'Disgust', 'intensity': '4', 'reason': "there's a whole organization dedicated to guns"}, {'emotion': 'Anger', 'intensity': '3', 'reason': "We shouldn't have a national organization dedicated to ke…	[{'emotion': 'Amusement', 'intensity': '3', 'reason': "I'm not sure why the NRA would face a financial crisis.", 'url': 'anonymous-source/all_shooting_images_newest/44.jpg'}, {'emotion': 'Contentment', 'intensity': '3', 'reason': 'fear', 'url': 'anonymous-source/all_shooting_images_newest/44.jpg'}, {'emotion': 'Disgust', 'intensity': '5', 'reason': 'It’s disgusting to hear that an organization fo…
129	Regulations for shooting in neighborhoods 'not going to happen overnight'	anonymous-source/all_shooting_images_newest/90006.jpg	[{'emotion': 'Fear', 'intensity': '3', 'reason': '.'}, {'emotion': 'Sadness', 'intensity': '3', 'reason': "I understand they wont happen overnight but that does not mean we should not start today. If we don't start nothing will ever change, small steps toward safety is closer than no steps at all. "}, {'emotion': 'Fear', 'intensity': '3', 'reason': 'shoots '}, {'emotion': 'Anger', 'intensity': '3…	[{'emotion': 'Anger', 'intensity': '4', 'reason': 'Tensions among individuals '}, {'emotion': 'Awe', 'intensity': '3', 'reason': "I don't know what they are talking about"}, {'emotion': 'Contentment', 'intensity': '3', 'reason': 'not sure how this relates to gun violence'}, {'emotion': 'Sadness', 'intensity': '1', 'reason': "I don't really know what's going on"}, {'emotion': 'Awe', 'intensity': '…	[{'emotion': 'Sadness', 'intensity': '3', 'reason': 'It means that it will take a while for laws to be put in place', 'url': 'anonymous-source/all_shooting_images_newest/90006.jpg'}, {'emotion': 'Fear', 'intensity': '3', 'reason': 'fear', 'url': 'anonymous-source/all_shooting_images_newest/90006.jpg'}, {'emotion': 'Anger', 'intensity': '4', 'reason': 'Statements like these frustrates me. Obviousl…
130	Synagogue shooter 'listened to noise and noise told him his people were being slaughtered', says Jewish doctor who spoke to Robert Bowers	anonymous-source/all_shooting_images_newest/100086.jpg	[{'emotion': 'Sadness', 'intensity': '3', 'reason': '.'}, {'emotion': 'Disgust', 'intensity': '3', 'reason': 'This makes no sense; there is no excuse for a shooting. He had a mental health condition, and the audacity to bring religion into motivation for killing people is an insult to their ancestors and anyone who practices Judaism. '}, {'emotion': 'Fear', 'intensity': '3', 'reason': 'dont under…	[{'emotion': 'Disgust', 'intensity': '4', 'reason': 'Intense facial expressions '}, {'emotion': 'Fear', 'intensity': '3', 'reason': 'He killed someone or he was killed?'}, {'emotion': 'Disgust', 'intensity': '3', 'reason': 'he looks like he did something bad'}, {'emotion': 'Sadness', 'intensity': '1', 'reason': "I don't know who he is, but he probably did something bad."}, {'emotion': 'Fear', 'in…	[{'emotion': 'Disgust', 'intensity': '2', 'reason': "It's a poor excuse to shoot people.", 'url': 'anonymous-source/all_shooting_images_newest/100086.jpg'}, {'emotion': 'Excitement', 'intensity': '2', 'reason': 'happy', 'url': 'anonymous-source/all_shooting_images_newest/100086.jpg'}, {'emotion': 'Anger', 'intensity': '4', 'reason': 'This angers me because innocent are victims to these shootings.…
131	Tragic twist in synagogue shooting where gunman 'wanted all jews to die'	anonymous-source/all_shooting_images_newest/100134.jpg	[{'emotion': 'Disgust', 'intensity': '3', 'reason': '.'}, {'emotion': 'Disgust', 'intensity': '3', 'reason': 'He is mentally ill. Nothing justifies killing innocent people especially not in their place of worship. '}, {'emotion': 'Fear', 'intensity': '4', 'reason': 'deaths '}, {'emotion': 'Anger', 'intensity': '5', 'reason': 'racism is terrifying, even more terrifying with gun'}, {'emotion': 'Ang…	[{'emotion': 'Excitement', 'intensity': '3', 'reason': 'Not much emotions raised without context '}, {'emotion': 'Fear', 'intensity': '3', 'reason': 'who is he?\r\n'}, {'emotion': 'Sadness', 'intensity': '3', 'reason': 'im jewish and we are constantly targeted '}, {'emotion': 'Disgust', 'intensity': '5', 'reason': 'If this is the perpetrator, he committed a hate crime.'}, {'emotion': 'Contentment…	[{'emotion': 'Anger', 'intensity': '2', 'reason': 'Ignorance is so blatant in his words', 'url': 'anonymous-source/all_shooting_images_newest/100134.jpg'}, {'emotion': 'Excitement', 'intensity': '3', 'reason': 'happy', 'url': 'anonymous-source/all_shooting_images_newest/100134.jpg'}, {'emotion': 'Fear', 'intensity': '4', 'reason': 'It’s scary to hear about someone trying to kill you in a place wh…
132	Wisconsin teens take anti-gun march to House Speaker Ryan's hometown	anonymous-source/all_shooting_images_newest/10592.jpg	[{'emotion': 'Contentment', 'intensity': '3', 'reason': '.'}, {'emotion': 'Excitement', 'intensity': '3', 'reason': 'I was a teen less than 6 months ago and this makes me proud to be apart of a generation that is so aware of what is happening in the world and takes action for what they believe in. '}, {'emotion': 'Contentment', 'intensity': '3', 'reason': 'some progress '}, {'emotion': 'Awe', 'in…	[{'emotion': 'Excitement', 'intensity': '3', 'reason': 'Sense of power '}, {'emotion': 'Awe', 'intensity': '3', 'reason': "I don't know who he is, but he looks serious"}, {'emotion': 'Fear', 'intensity': '3', 'reason': 'he looks bad but i dont know who that is'}, {'emotion': 'Anger', 'intensity': '4', 'reason': "I have a general resentment towards politicians because they say they're for the peop…	[{'emotion': 'Excitement', 'intensity': '3', 'reason': "It's good to see the youth of today standing up for what they believe in.", 'url': 'anonymous-source/all_shooting_images_newest/10592.jpg'}, {'emotion': 'Contentment', 'intensity': '2', 'reason': 'happy', 'url': 'anonymous-source/all_shooting_images_newest/10592.jpg'}, {'emotion': 'Awe', 'intensity': '4', 'reason': 'It’s important for everyo…
133	New restrictions on gun ownership signed into law by California Gov. Jerry Brown, a Democrat	anonymous-source/all_shooting_images_newest/90326.jpg	[{'emotion': 'Contentment', 'intensity': '3', 'reason': '.'}, {'emotion': 'Contentment', 'intensity': '3', 'reason': 'things are moving in the right direction'}, {'emotion': 'Contentment', 'intensity': '4', 'reason': 'some progress '}, {'emotion': 'Contentment', 'intensity': '3', 'reason': 'finally the legislation improved'}, {'emotion': 'Fear', 'intensity': '3', 'reason': 'Feeling fear when I he…	[{'emotion': 'Anger', 'intensity': '3', 'reason': 'Intense facial expressions '}, {'emotion': 'Awe', 'intensity': '3', 'reason': 'Who is he???'}, {'emotion': 'Anger', 'intensity': '3', 'reason': 'he looks mean and guilty'}, {'emotion': 'Anger', 'intensity': '3', 'reason': "I have a general resentment towards politicians because they say they're for the people but most of them don't actually care.…	[{'emotion': 'Contentment', 'intensity': '3', 'reason': 'Hopefully, other states will follow his lead', 'url': 'anonymous-source/all_shooting_images_newest/90326.jpg'}, {'emotion': 'Contentment', 'intensity': '2', 'reason': 'happy', 'url': 'anonymous-source/all_shooting_images_newest/90326.jpg'}, {'emotion': 'Contentment', 'intensity': '3', 'reason': 'I’m not sure what the new restrictions in reg…
134	Police boost patrols at synagogues after Pittsburgh shooting	anonymous-source/all_shooting_images_newest/100409.jpg	[{'emotion': 'Contentment', 'intensity': '3', 'reason': '.'}, {'emotion': 'Amusement', 'intensity': '3', 'reason': 'their job is to keep people safe, so now that they could sufficiently do that before, they are taking measures after the fact. Too little too late. '}, {'emotion': 'Fear', 'intensity': '3', 'reason': 'shooting '}, {'emotion': 'Sadness', 'intensity': '2', 'reason': 'hope that the act…	[{'emotion': 'Fear', 'intensity': '3', 'reason': 'Sense of insecure '}, {'emotion': 'Awe', 'intensity': '4', 'reason': 'The soldiers make me feel safety'}, {'emotion': 'Awe', 'intensity': '3', 'reason': 'police are there to protect us '}, {'emotion': 'Fear', 'intensity': '2', 'reason': "I don't have exact context but it look serious"}, {'emotion': 'Excitement', 'intensity': '3', 'reason': 'I like…	[{'emotion': 'Contentment', 'intensity': '4', 'reason': 'There are less chances of a shooting happening again', 'url': 'anonymous-source/all_shooting_images_newest/100409.jpg'}, {'emotion': 'Fear', 'intensity': '2', 'reason': 'happy', 'url': 'anonymous-source/all_shooting_images_newest/100409.jpg'}, {'emotion': 'Fear', 'intensity': '4', 'reason': 'It’s scary to hear that a place that one goes to …
135	South Florida billionaire: I won't give any money to politicians who don't support gun control	anonymous-source/all_shooting_images_newest/10665.jpg	[{'emotion': 'Contentment', 'intensity': '3', 'reason': '.'}, {'emotion': 'Contentment', 'intensity': '3', 'reason': 'he does not owe anything to anyone and taking a stance that is likely not the popular opinion of the people surrounding him is helpful. People admire people of power and maybe this statement will cause his fellow Floridians to reevaluate their opinion on gun violence and gun contr…	[{'emotion': 'Fear', 'intensity': '3', 'reason': 'Sense of insecure '}, {'emotion': 'Fear', 'intensity': '3', 'reason': 'I just afraid of guns'}, {'emotion': 'Disgust', 'intensity': '3', 'reason': 'its so easy to buy a gun without a background check'}, {'emotion': 'Anger', 'intensity': '2', 'reason': 'Nobody needs this many guns\r\n'}, {'emotion': 'Contentment', 'intensity': '3', 'reason': 'they …	[{'emotion': 'Contentment', 'intensity': '3', 'reason': "He's standing up for gun control which is a good thing", 'url': 'anonymous-source/all_shooting_images_newest/10665.jpg'}, {'emotion': 'Awe', 'intensity': '1', 'reason': 'happy', 'url': 'anonymous-source/all_shooting_images_newest/10665.jpg'}, {'emotion': 'Fear', 'intensity': '5', 'reason': 'This frustrates and scares me because people have …
136	Texas Governor unveils school safety plan after deadly shooting	anonymous-source/all_shooting_images_newest/10878.jpg	[{'emotion': 'Sadness', 'intensity': '3', 'reason': '.'}, {'emotion': 'Amusement', 'intensity': '3', 'reason': 'once again, too little too late. Less damage control, more preventative action. '}, {'emotion': 'Contentment', 'intensity': '4', 'reason': 'good preparation '}, {'emotion': 'Contentment', 'intensity': '2', 'reason': 'why legislations can only be made after the tragedy?'}, {'emotion': 'A…	[{'emotion': 'Excitement', 'intensity': '3', 'reason': 'Sense of positive emotions '}, {'emotion': 'Amusement', 'intensity': '3', 'reason': 'What relation of this pic and gun violence?'}, {'emotion': 'Awe', 'intensity': '3', 'reason': 'people supporting others is great'}, {'emotion': 'Sadness', 'intensity': '3', 'reason': "This is a kind gesture but doesn't make up for the fact that children are …	[{'emotion': 'Contentment', 'intensity': '3', 'reason': "Hopefully it'll be enough to prevent future shootings", 'url': 'anonymous-source/all_shooting_images_newest/10878.jpg'}, {'emotion': 'Awe', 'intensity': '3', 'reason': 'happy', 'url': 'anonymous-source/all_shooting_images_newest/10878.jpg'}, {'emotion': 'Sadness', 'intensity': '4', 'reason': 'It’s important to recover from the unfortunate e…
137	Clippers and Bucks wear T-shirts saying 'Enough' on front, with shooting victims names on back	anonymous-source/all_shooting_images_newest/110506.jpg	[{'emotion': 'Contentment', 'intensity': '3', 'reason': '.'}, {'emotion': 'Contentment', 'intensity': '3', 'reason': 'These teams have a platform that comes with responsibility and power. Make an impression on their community. This was respectful, and while I do not live in the area or know the context, it makes me proud and makes me want to support them and advocate for gun control. '}, {'emotio…	[{'emotion': 'Sadness', 'intensity': '3', 'reason': 'Sense of empathy '}, {'emotion': 'Sadness', 'intensity': '3', 'reason': 'I feel so sad for these people, they should not be like this'}, {'emotion': 'Sadness', 'intensity': '3', 'reason': 'this country has had too many memorials'}, {'emotion': 'Sadness', 'intensity': '3', 'reason': "I'm sad this has to be done, but glad that sports players are …	[{'emotion': 'Excitement', 'intensity': '3', 'reason': "It's exciting to see icons standing up for gun control", 'url': 'anonymous-source/all_shooting_images_newest/110506.jpg'}, {'emotion': 'Awe', 'intensity': '2', 'reason': 'happy', 'url': 'anonymous-source/all_shooting_images_newest/110506.jpg'}, {'emotion': 'Awe', 'intensity': '5', 'reason': 'This is important, especially for many people who …
138	NRA says it faces financial crisis, claims it might be 'unable to exist' in future: lawsuit	anonymous-source/all_shooting_images_newest/81.jpg	[{'emotion': 'Fear', 'intensity': '3', 'reason': '.'}, {'emotion': 'Contentment', 'intensity': '3', 'reason': 'The NRA is part of the problem and their disbandment would make many people including me happy. '}, {'emotion': 'Fear', 'intensity': '3', 'reason': 'crisis '}, {'emotion': 'Excitement', 'intensity': '3', 'reason': 'there are some positive effect of protesting gun control'}, {'emotion': '…	[{'emotion': 'Excitement', 'intensity': '3', 'reason': 'Rich and positive facial expressions '}, {'emotion': 'Amusement', 'intensity': '3', 'reason': "It's a repeating pic"}, {'emotion': 'Disgust', 'intensity': '4', 'reason': 'NRA shouldnt be a thing'}, {'emotion': 'Anger', 'intensity': '3', 'reason': "We shouldn't have a national organization dedicated to keeping guns around"}, {'emotion': 'Cont…	[{'emotion': 'Fear', 'intensity': '3', 'reason': 'Not sure how I feel about it', 'url': 'anonymous-source/all_shooting_images_newest/81.jpg'}, {'emotion': 'Amusement', 'intensity': '2', 'reason': 'happy', 'url': 'anonymous-source/all_shooting_images_newest/81.jpg'}, {'emotion': 'Excitement', 'intensity': '4', 'reason': 'I feel like the NRA holds a lot of power and benefits a certain group of peop…
139	Trump Hotel Event Shooting Threat Probed by Feds: Bloodstained MAGA Hats as Trophies	anonymous-source/all_shooting_images_newest/90051.jpg	[{'emotion': 'Fear', 'intensity': '3', 'reason': '.'}, {'emotion': 'Anger', 'intensity': '3', 'reason': 'you cannot fight violence with violence. '}, {'emotion': 'Disgust', 'intensity': '4', 'reason': 'I dont understand '}, {'emotion': 'Anger', 'intensity': '4', 'reason': 'there are threats with gun because almost everyone can get access to it'}, {'emotion': 'Anger', 'intensity': '3', 'reason': "…	[{'emotion': 'Anger', 'intensity': '3', 'reason': 'Feeling of insecure '}, {'emotion': 'Anger', 'intensity': '5', 'reason': 'I think he should be the first to die'}, {'emotion': 'Disgust', 'intensity': '3', 'reason': 'people are so scary and threaten others just because of their political affiliation '}, {'emotion': 'Awe', 'intensity': '4', 'reason': "It's sad these all threats have to be taken s…	[{'emotion': 'Fear', 'intensity': '3', 'reason': "It's terrifying to see such violent posts on social media", 'url': 'anonymous-source/all_shooting_images_newest/90051.jpg'}, {'emotion': 'Amusement', 'intensity': '3', 'reason': 'happy', 'url': 'anonymous-source/all_shooting_images_newest/90051.jpg'}, {'emotion': 'Fear', 'intensity': '3', 'reason': 'It’s scary to think that someone is going to kil…
140	Police: San Jose teacher suspected in road rage incident arrested in classroom with loaded gun	anonymous-source/all_shooting_images_newest/69.jpg	[{'emotion': 'Fear', 'intensity': '3', 'reason': 'The kids must have been terrified!'}, {'emotion': 'Fear', 'intensity': '4', 'reason': 'the teacher knows all of the lockdown procedures which would make it easier to get to the children.'}, {'emotion': 'Contentment', 'intensity': '3', 'reason': 'Justice was served'}, {'emotion': 'Fear', 'intensity': '4', 'reason': 'It seems kids are not safe with …	[{'emotion': 'Excitement', 'intensity': '3', 'reason': 'Positive facial expressions '}, {'emotion': 'Sadness', 'intensity': '5', 'reason': 'I feel sad about people that are hurt by guns'}, {'emotion': 'Fear', 'intensity': '3', 'reason': 'This guy looks like prisoner'}, {'emotion': 'Anger', 'intensity': '3', 'reason': 'It seems like this man has probably caused a lot of harm.'}, {'emotion': 'Amuse…	[{'emotion': 'Anger', 'intensity': '4', 'reason': "It is so danger to have a load gun in the classroom where there are a lot of students there. As a teacher, he's responsibility is not only to teach the students knowledge, but also including keep the students safe.", 'url': 'anonymous-source/all_shooting_images_newest/69.jpg'}, {'emotion': 'Fear', 'intensity': '2', 'reason': 'why is he smiling, h…
141	New York Today: Survivors of Gun Violence	anonymous-source/all_shooting_images_newest/10428.jpg	[{'emotion': 'Sadness', 'intensity': '3', 'reason': "What's happening in this city is a disaster."}, {'emotion': 'Awe', 'intensity': '4', 'reason': 'I have great respect and compassion for survivors in gun violence'}, {'emotion': 'Sadness', 'intensity': '3', 'reason': 'of the trauma and pain survivors exprienced'}, {'emotion': 'Awe', 'intensity': '1', 'reason': "I actually don't feel anything. Ju…	[{'emotion': 'Fear', 'intensity': '4', 'reason': 'Intense pictures '}, {'emotion': 'Sadness', 'intensity': '4', 'reason': 'I feel sad for people that are harmed by guns\r\n\r\n'}, {'emotion': 'Fear', 'intensity': '4', 'reason': 'this is so scary '}, {'emotion': 'Sadness', 'intensity': '3', 'reason': 'It makes me think about the pain people have gone through from gun related violence. '}, {'emotio…	[{'emotion': 'Sadness', 'intensity': '2', 'reason': 'It is so lucky for this man to survive after shooting by a gun. This is one good thing. But it also makes me feel sad cause there are so many people who died because of gun. ', 'url': 'anonymous-source/all_shooting_images_newest/10428.jpg'}, {'emotion': 'Sadness', 'intensity': '2', 'reason': 'Sad to see the repercussions of gun violence\r\n', '…
142	Donald Trump Says Arming Teachers Will Stop Shootings In Schools	anonymous-source/all_shooting_images_newest/10448.jpg	[{'emotion': 'Amusement', 'intensity': '3', 'reason': 'Teachers are not police, they should not be armed!'}, {'emotion': 'Disgust', 'intensity': '4', 'reason': 'This is a moronic idea.'}, {'emotion': 'Fear', 'intensity': '3', 'reason': 'im scared that this would cause more shootings'}, {'emotion': 'Amusement', 'intensity': '1', 'reason': "Wouldn't that increase shootings in schools since there ar…	[{'emotion': 'Sadness', 'intensity': '3', 'reason': 'Feeling of empathy '}, {'emotion': 'Anger', 'intensity': '4', 'reason': 'I feel sad about people that do not take gun violence seriously'}, {'emotion': 'Sadness', 'intensity': '4', 'reason': 'people are memorizing them. It is very sad'}, {'emotion': 'Sadness', 'intensity': '3', 'reason': 'I do not know what is happening in the photo, but I know…	[{'emotion': 'Contentment', 'intensity': '3', 'reason': 'This headline shows that the government is now at least paying some attention to gun violence in school.', 'url': 'anonymous-source/all_shooting_images_newest/10448.jpg'}, {'emotion': 'Amusement', 'intensity': '2', 'reason': 'This hilarious. How?', 'url': 'anonymous-source/all_shooting_images_newest/10448.jpg'}, {'emotion': 'Anger', 'intens…
143	California governor signs bill to raise age requirement to 21 for purchase of rifles, shotguns	anonymous-source/all_shooting_images_newest/90007.jpg	[{'emotion': 'Contentment', 'intensity': '3', 'reason': 'Stricter age limits could make it harder to get guns'}, {'emotion': 'Excitement', 'intensity': '4', 'reason': 'This is a significant advancement for gun safety'}, {'emotion': 'Contentment', 'intensity': '3', 'reason': 'this will prevent young people from having a gun and hopefully reduce shootings'}, {'emotion': 'Anger', 'intensity': '1', '…	[{'emotion': 'Anger', 'intensity': '3', 'reason': 'Rich facial expressions '}, {'emotion': 'Disgust', 'intensity': '4', 'reason': 'I feel anger at people that use their influence to promote violence'}, {'emotion': 'Fear', 'intensity': '4', 'reason': "who's this"}, {'emotion': 'Contentment', 'intensity': '3', 'reason': 'I do not know who this man is. '}, {'emotion': 'Awe', 'intensity': '3', 'reaso…	[{'emotion': 'Contentment', 'intensity': '4', 'reason': 'This really makes sense here. Since people at a young age can not control themselves well. Such regulations can help to avoid quite amount of tragedies in school.', 'url': 'anonymous-source/all_shooting_images_newest/90007.jpg'}, {'emotion': 'Contentment', 'intensity': '1', 'reason': "Good measure but I honestly can't see how that would mak…
144	EA Launches Safety Review in Wake of Jacksonville Shooting	anonymous-source/all_shooting_images_newest/291.jpg	[{'emotion': 'Contentment', 'intensity': '3', 'reason': 'Anyway, safety is the first priority'}, {'emotion': 'Contentment', 'intensity': '4', 'reason': 'This appears to be an appropriate response'}, {'emotion': 'Contentment', 'intensity': '3', 'reason': 'they are preventing future shootings'}, {'emotion': 'Anger', 'intensity': '1', 'reason': 'They should be doing this before the shooting maybe'},…	[{'emotion': 'Fear', 'intensity': '3', 'reason': 'No emotions are raised '}, {'emotion': 'Fear', 'intensity': '4', 'reason': 'I feel fear at people that use guns to harm people'}, {'emotion': 'Fear', 'intensity': '4', 'reason': 'tere are police coming around '}, {'emotion': 'Fear', 'intensity': '3', 'reason': 'I do not know what is happening, but it seems like soemone(s) could be in harms way. '}…	[{'emotion': 'Contentment', 'intensity': '1', 'reason': 'The safety review should be showed to people earlier instead after when a tragedy already happened. People should try their best to avoid such things.', 'url': 'anonymous-source/all_shooting_images_newest/291.jpg'}, {'emotion': 'Anger', 'intensity': '1', 'reason': 'Just another bureaucratic procedure that will lead to findings but no implem…
145	Shares of Gun Makers Rally Ahead of Election Outcome	anonymous-source/all_shooting_images_newest/110455.jpg	[{'emotion': 'Fear', 'intensity': '3', 'reason': 'In short, guns must be strictly controlled'}, {'emotion': 'Fear', 'intensity': '4', 'reason': 'This implies use of force if their desired candidate does not win '}, {'emotion': 'Anger', 'intensity': '3', 'reason': 'they are going to rally before the election outcome'}, {'emotion': 'Disgust', 'intensity': '2', 'reason': "What's this obsession with …	[{'emotion': 'Fear', 'intensity': '3', 'reason': 'No emotions are raised '}, {'emotion': 'Fear', 'intensity': '4', 'reason': 'I feel fear at people that use guns to harm people'}, {'emotion': 'Fear', 'intensity': '4', 'reason': 'so many guns '}, {'emotion': 'Anger', 'intensity': '3', 'reason': 'It reminds me that guns are easy to buy, and they are not usually locked up in a way that prevents them…	[{'emotion': 'Anger', 'intensity': '3', 'reason': 'It is so ridiculous to link an increasing stock price of the guns with the election. It seems so crazy.', 'url': 'anonymous-source/all_shooting_images_newest/110455.jpg'}, {'emotion': 'Anger', 'intensity': '2', 'reason': 'Gun makers and the industry is the only reason why guns have not been made illegal yet. Way too much business interest being r…
146	Has Parkland changed Americans views on guns?	anonymous-source/all_shooting_images_newest/10583.jpg	[{'emotion': 'Disgust', 'intensity': '3', 'reason': 'I have no idea...'}, {'emotion': 'Amusement', 'intensity': '4', 'reason': 'This sounds like an interesting article'}, {'emotion': 'Contentment', 'intensity': '3', 'reason': 'im interested to read the news regarding American view on guns'}, {'emotion': 'Amusement', 'intensity': '1', 'reason': "It doesn't make feel anything"}, {'emotion': 'Disgus…	[{'emotion': 'Anger', 'intensity': '4', 'reason': 'Intense among individuals '}, {'emotion': 'Excitement', 'intensity': '4', 'reason': 'I feel excited for people that want to end gun violence'}, {'emotion': 'Excitement', 'intensity': '3', 'reason': "I don't know what is nra but this is parade"}, {'emotion': 'Excitement', 'intensity': '4', 'reason': 'I am glad to see people protesting gun violence…	[{'emotion': 'Anger', 'intensity': '4', 'reason': 'There are 19 students died in this case. The teaching of how to use guns should be taught to students or adults earlier, instead of after a event like this.', 'url': 'anonymous-source/all_shooting_images_newest/10583.jpg'}, {'emotion': 'Excitement', 'intensity': '1', 'reason': "caption poses a question so I can't really deduce anything. I support…
147	Hollywood Calls for Gun Control, Urges Voting in Wake of Synagogue Massacre	anonymous-source/all_shooting_images_newest/100492.jpg	[{'emotion': 'Fear', 'intensity': '3', 'reason': 'These tragedies could have been avoided'}, {'emotion': 'Awe', 'intensity': '4', 'reason': 'It is nice to see unity across all sorts of fields and sectors'}, {'emotion': 'Contentment', 'intensity': '3', 'reason': 'they are trying to Bring change to gun control to precent future massacres and shootings'}, {'emotion': 'Contentment', 'intensity': '1',…	[{'emotion': 'Sadness', 'intensity': '3', 'reason': 'Feeling of empathy '}, {'emotion': 'Sadness', 'intensity': '4', 'reason': 'I feel sad for people that are harmed by guns'}, {'emotion': 'Sadness', 'intensity': '4', 'reason': 'people are giving flowers in graveyard'}, {'emotion': 'Sadness', 'intensity': '3', 'reason': 'It reminds me how young children and families are impacted by gun violence. …	[{'emotion': 'Contentment', 'intensity': '2', 'reason': "It is the government and the celebrities responsibilities to raise the citizens' awareness of how to use gun correctly. And gun control are very important in place where people are allowed to have a gun.", 'url': 'anonymous-source/all_shooting_images_newest/100492.jpg'}, {'emotion': 'Contentment', 'intensity': '1', 'reason': 'Again, I am ha…
148	NRA Is Losing Major Sponsors and Partners Amid Calls for a Boycott	anonymous-source/all_shooting_images_newest/10127.jpg	[{'emotion': 'Contentment', 'intensity': '3', 'reason': 'Let NRA die'}, {'emotion': 'Excitement', 'intensity': '4', 'reason': 'The NRA perpetuates violence and should lose its sponsors'}, {'emotion': 'Sadness', 'intensity': '3', 'reason': 'people who work in NRA are going to suffer and not be able to get as much money as before to support themselves and their families'}, {'emotion': 'Contentment'…	[{'emotion': 'Anger', 'intensity': '3', 'reason': 'Rich facial expressions '}, {'emotion': 'Anger', 'intensity': '4', 'reason': 'I feel anger at people that use their influence to promote violence'}, {'emotion': 'Fear', 'intensity': '4', 'reason': "I don't know who's this "}, {'emotion': 'Contentment', 'intensity': '3', 'reason': 'I do not know who the man in the photo is. '}, {'emotion': 'Amusem…	[{'emotion': 'Contentment', 'intensity': '3', 'reason': 'It is a good news that the citizens have made a boycott to the gun use. ', 'url': 'anonymous-source/all_shooting_images_newest/10127.jpg'}, {'emotion': 'Excitement', 'intensity': '1', 'reason': 'I wish this move gained traction but I am not sure how old this caption is and I doubt anything major resulted in it.', 'url': 'anonymous-source/al…
149	Ex- FBI agent: In an era of mass shootings, some advice on safety	anonymous-source/all_shooting_images_newest/98.jpg	[{'emotion': 'Contentment', 'intensity': '3', 'reason': 'More action is needed than just advice'}, {'emotion': 'Amusement', 'intensity': '4', 'reason': 'The title grabs your attention '}, {'emotion': 'Sadness', 'intensity': '3', 'reason': 'Its sad that a lot of mass shooting have occurred to a point where the FBI agent was considered to be in an era of mass shootings. Its sad to think of all the …	[{'emotion': 'Contentment', 'intensity': '3', 'reason': 'No emotions are raised '}, {'emotion': 'Sadness', 'intensity': '4', 'reason': 'I feel sad about people that do not take gun violence seriously'}, {'emotion': 'Fear', 'intensity': '4', 'reason': 'is people carring gun in this event?'}, {'emotion': 'Contentment', 'intensity': '3', 'reason': 'I do not understand what is happening in the photo.…	[{'emotion': 'Awe', 'intensity': '3', 'reason': 'It is so important and necessary to tell people how to protect themselves especially in areas where there are a lot of shootings.', 'url': 'anonymous-source/all_shooting_images_newest/98.jpg'}, {'emotion': 'Disgust', 'intensity': '1', 'reason': 'It sucks that people have to adjust their livelihoods and be considerate of dangers just because a minor…
150	EA cancels eSports tournament amid security fears after Jacksonville shooting	anonymous-source/all_shooting_images_newest/90.jpg	[{'emotion': 'Sadness', 'intensity': '3', 'reason': "The shootings brought a very bad experience to people's lives"}, {'emotion': 'Sadness', 'intensity': '4', 'reason': 'It is unfortunate that we can not fully live our lives without fear of gun violence'}, {'emotion': 'Contentment', 'intensity': '3', 'reason': 'Im happy they cancelled the tournament to make sure everyone is going to be safe first…	[{'emotion': 'Sadness', 'intensity': '3', 'reason': 'Rich facial expressions '}, {'emotion': 'Anger', 'intensity': '4', 'reason': 'I feel anger at people that use guns to hurt people'}, {'emotion': 'Fear', 'intensity': '4', 'reason': "I don't knwo what is happening. cant tell any emotions"}, {'emotion': 'Fear', 'intensity': '3', 'reason': 'I do not know who the man in the photo is, but the expres…	[{'emotion': 'Contentment', 'intensity': '3', 'reason': "At anytime, people's life are the most important thing. We can not put people in danger situations to finish some competitions that can be hold later. If people die, they will never have chance to participate in such competitions.", 'url': 'anonymous-source/all_shooting_images_newest/90.jpg'}, {'emotion': 'Disgust', 'intensity': '1', 'reaso…
151	What to Do When There s an Active Shooter	anonymous-source/all_shooting_images_newest/10464.jpg	[{'emotion': 'Fear', 'intensity': '3', 'reason': "I really don't know what to do"}, {'emotion': 'Amusement', 'intensity': '4', 'reason': 'My interest is peaked because this is a very relevant topic'}, {'emotion': 'Sadness', 'intensity': '3', 'reason': 'its sad to think we have gotten to a point where there are so many mass shooting that there is news headlines on what to do if there is an active …	[{'emotion': 'Sadness', 'intensity': '3', 'reason': 'Sense of empathy '}, {'emotion': 'Sadness', 'intensity': '4', 'reason': 'I feel sad for people that are harmed by guns'}, {'emotion': 'Sadness', 'intensity': '3', 'reason': 'people are crying '}, {'emotion': 'Sadness', 'intensity': '3', 'reason': 'It seems like something bad has happened, and I feel bad for the people in the photo. '}, {'emotio…	[{'emotion': 'Awe', 'intensity': '3', 'reason': 'It is important to give people about basic informations or sometimes some skills to keep themselves safe from shooting, especially in areas where there are active shooters.', 'url': 'anonymous-source/all_shooting_images_newest/10464.jpg'}, {'emotion': 'Disgust', 'intensity': '2', 'reason': 'Same reason as the last one. People should not have to adj…
152	Trump: I'd have rushed into Florida school during shooting Video	anonymous-source/all_shooting_images_newest/10469.jpg	[{'emotion': 'Awe', 'intensity': '3', 'reason': "He'd better do that"}, {'emotion': 'Disgust', 'intensity': '4', 'reason': 'The only place Donald Trump is running into is a wig shop '}, {'emotion': 'Sadness', 'intensity': '3', 'reason': 'of all the kids hurt in the school shooting'}, {'emotion': 'Amusement', 'intensity': '2', 'reason': 'I really really doubt that'}, {'emotion': 'Awe', 'intensity'…	[{'emotion': 'Excitement', 'intensity': '3', 'reason': 'Rich facial expressions '}, {'emotion': 'Disgust', 'intensity': '4', 'reason': 'I feel disgust about people that use their influence to harm people'}, {'emotion': 'Awe', 'intensity': '3', 'reason': "I don't like him"}, {'emotion': 'Disgust', 'intensity': '3', 'reason': 'I am reminded of the harmful things Trump said when he was president. '}…	[{'emotion': 'Anger', 'intensity': '4', 'reason': 'Again, people should take actions earlier to avoid tragedies like this, especially in the school. ', 'url': 'anonymous-source/all_shooting_images_newest/10469.jpg'}, {'emotion': 'Amusement', 'intensity': '2', 'reason': "I don't take Trump seriously. He is a populist by nature. He is a comedian to me.", 'url': 'anonymous-source/all_shooting_images…
153	Andrew Cuomo using banks to target NRA, faces major legal test	anonymous-source/all_shooting_images_newest/90021.jpg	[{'emotion': 'Contentment', 'intensity': '3', 'reason': 'This title is not comprehensive, but I hope the NRA will be limited'}, {'emotion': 'Amusement', 'intensity': '4', 'reason': 'I would like to know more '}, {'emotion': 'Disgust', 'intensity': '3', 'reason': 'trying to things illegally is bad and just disgusting '}, {'emotion': 'Awe', 'intensity': '2', 'reason': 'Legal tests are needed for ch…	[{'emotion': 'Anger', 'intensity': '3', 'reason': 'Facial expressions '}, {'emotion': 'Sadness', 'intensity': '4', 'reason': 'I feel sad about people that do not take gun violence seriously'}, {'emotion': 'Fear', 'intensity': '3', 'reason': "I don't know who's this"}, {'emotion': 'Anger', 'intensity': '3', 'reason': 'I know Cuomo opposed gun violence; however, he made very damaging choices in oth…	[{'emotion': 'Anger', 'intensity': '4', 'reason': 'Actually this men is doing something good for our society, but maybe he used a bad way.', 'url': 'anonymous-source/all_shooting_images_newest/90021.jpg'}, {'emotion': 'Contentment', 'intensity': '1', 'reason': 'Too bad he has those sexual assault allegations and that he shit the bed with covid. Otherwise I might have liked him.', 'url': 'anonymou…
154	Mass Shooting at Florida Esports Event Raises Questions About Security	anonymous-source/all_shooting_images_newest/302.jpg	[{'emotion': 'Anger', 'intensity': '3', 'reason': "I don't want shootings to happen around me"}, {'emotion': 'Fear', 'intensity': '4', 'reason': 'I feel unsafe'}, {'emotion': 'Sadness', 'intensity': '3', 'reason': 'the athletes who just want to compete and play there sport were probably hurt or even killed in shooting '}, {'emotion': 'Contentment', 'intensity': '1', 'reason': 'What am I supposed …	[{'emotion': 'Excitement', 'intensity': '3', 'reason': 'No emotions raised '}, {'emotion': 'Fear', 'intensity': '4', 'reason': 'I feel fear about people that are harmed by guns because that can also be myself'}, {'emotion': 'Fear', 'intensity': '3', 'reason': 'police are coming around'}, {'emotion': 'Fear', 'intensity': '3', 'reason': 'I am reminded by the fact that police can be both good and ba…	[{'emotion': 'Sadness', 'intensity': '4', 'reason': "There are so many people in this event, and such Mass shooting will definitely cause a lot or people injured or died. And this kind of event will destroy those e-sports players' career and they may also have some psychological issues after that.", 'url': 'anonymous-source/all_shooting_images_newest/302.jpg'}, {'emotion': 'Disgust', 'intensity':…
155	Is the Sandy Hook massacre the real reason behind the gunmaker's bankruptcy?	anonymous-source/all_shooting_images_newest/10176.jpg	[{'emotion': 'Anger', 'intensity': '3', 'reason': 'I think the real reason, of course, is that the public has lost confidence of social security'}, {'emotion': 'Amusement', 'intensity': '4', 'reason': 'This sounds conspicuous '}, {'emotion': 'Sadness', 'intensity': '3', 'reason': "gunmakers are going bankrupt and probably can't support themselves or their family"}, {'emotion': 'Amusement', 'inten…	[{'emotion': 'Excitement', 'intensity': '3', 'reason': 'No emotions are raised '}, {'emotion': 'Disgust', 'intensity': '4', 'reason': 'I feel disgust about people that use guns to harm other people'}, {'emotion': 'Fear', 'intensity': '4', 'reason': 'I am very scared of guns '}, {'emotion': 'Anger', 'intensity': '3', 'reason': 'I am angered by how easy it is for people to access guns. '}, {'emotio…	[{'emotion': 'Anger', 'intensity': '4', 'reason': 'After such a tragedy, what people should pay more attention to is about the injured ones and how to avoid such events in the future, instead of focusing on whether a gunmaker is bankrupt due to what reason.', 'url': 'anonymous-source/all_shooting_images_newest/10176.jpg'}, {'emotion': 'Anger', 'intensity': '1', 'reason': 'It should be.', 'url': '…
156	Florida politicians consider allowing teachers to carry guns	anonymous-source/all_shooting_images_newest/10622.jpg	[{'emotion': 'Anger', 'intensity': '3', 'reason': 'This is a ridiculous, impractical idea'}, {'emotion': 'Disgust', 'intensity': '4', 'reason': 'This is outrageous and dangerous '}, {'emotion': 'Anger', 'intensity': '4', 'reason': 'introducing more guns will not reduce shooting '}, {'emotion': 'Fear', 'intensity': '2', 'reason': "I don't want to go to a school where a lot of angry, high-alerted p…	[{'emotion': 'Anger', 'intensity': '4', 'reason': 'Rich facial expressions '}, {'emotion': 'Excitement', 'intensity': '4', 'reason': 'I feel excited for people that want to end gun violence'}, {'emotion': 'Excitement', 'intensity': '4', 'reason': 'people are protesting gun '}, {'emotion': 'Excitement', 'intensity': '3', 'reason': 'I am sad that people have to protest gun violence because it is su…	[{'emotion': 'Anger', 'intensity': '3', 'reason': 'There are already a lot of bad results caused bu gun holder. Why the government still considering allow teachers to carry guns. Especially they are teacher who need to meet a lot of students everyday.', 'url': 'anonymous-source/all_shooting_images_newest/10622.jpg'}, {'emotion': 'Anger', 'intensity': '2', 'reason': 'This is totally in the wrong d…
157	Eiffel Tower goes dark to honor Pittsburgh shooting victims	anonymous-source/all_shooting_images_newest/100494.jpg	[{'emotion': 'Sadness', 'intensity': '3', 'reason': 'I feel sorry for the tragedy'}, {'emotion': 'Contentment', 'intensity': '4', 'reason': 'The display of unity is touching '}, {'emotion': 'Sadness', 'intensity': '3', 'reason': 'of people killed'}, {'emotion': 'Awe', 'intensity': '2', 'reason': 'Human compassion is universal and touching'}, {'emotion': 'Sadness', 'intensity': '3', 'reason': 'I f…	[{'emotion': 'Sadness', 'intensity': '3', 'reason': 'No emotions are raised '}, {'emotion': 'Sadness', 'intensity': '4', 'reason': 'I feel fear at people that use guns to harm people'}, {'emotion': 'Excitement', 'intensity': '3', 'reason': "I don't know what this represents "}, {'emotion': 'Sadness', 'intensity': '3', 'reason': 'I am reminded of the powerful ways people have mourned victims of gu…	[{'emotion': 'Awe', 'intensity': '4', 'reason': 'the died people are innocent. and the action of turn off the lights on Eiffel Tower to honor the died is really good and necessary thing to do.', 'url': 'anonymous-source/all_shooting_images_newest/100494.jpg'}, {'emotion': 'Sadness', 'intensity': '2', 'reason': 'Our European friends have it right in banning gun ownership. The reason for this symbo…
158	Agriculture candidate Caldwell snags NRA s first statewide endorsement	anonymous-source/all_shooting_images_newest/10132.jpg	[{'emotion': 'Fear', 'intensity': '1', 'reason': "I don't know what this is talking about"}, {'emotion': 'Contentment', 'intensity': '4', 'reason': 'I guess a farmer would be ok'}, {'emotion': 'Contentment', 'intensity': '3', 'reason': 'less guns are being sold'}, {'emotion': 'Contentment', 'intensity': '2', 'reason': "I think that should happen because of what's going on."}, {'emotion': 'Fear', …	[{'emotion': 'Excitement', 'intensity': '3', 'reason': 'No emotions raised '}, {'emotion': 'Anger', 'intensity': '4', 'reason': 'I feel anger at people that use their influence to promote guns'}, {'emotion': 'Excitement', 'intensity': '3', 'reason': "I don't know what is nra"}, {'emotion': 'Anger', 'intensity': '3', 'reason': "I know how dangerous the NRA has been and how it has been a contributo…	[{'emotion': 'Awe', 'intensity': '3', 'reason': 'there must be some one to do something to protect people from injure by guns.', 'url': 'anonymous-source/all_shooting_images_newest/10132.jpg'}, {'emotion': 'Disgust', 'intensity': '1', 'reason': 'This is how gun ownership is kept legal. NRA puts its money in the pockets of politicians.', 'url': 'anonymous-source/all_shooting_images_newest/10132.jp…
159	Church gunman's wife says he cuffed her to bed, said he'd be 'right back' before rampage	anonymous-source/all_shooting_images_newest/99.jpg	[{'emotion': 'Disgust', 'intensity': '3', 'reason': 'This man is worse than a animal.'}, {'emotion': 'Fear', 'intensity': '4', 'reason': 'such a scary situation '}, {'emotion': 'Fear', 'intensity': '3', 'reason': 'of the terror that wife faced'}, {'emotion': 'Fear', 'intensity': '5', 'reason': 'That is crazy scary to think about.....'}, {'emotion': 'Disgust', 'intensity': '3', 'reason': 'This man…	[{'emotion': 'Excitement', 'intensity': '3', 'reason': 'No emotions are raised '}, {'emotion': 'Sadness', 'intensity': '4', 'reason': 'I feel sad for people that are harmed by guns'}, {'emotion': 'Amusement', 'intensity': '3', 'reason': 'Children playing around '}, {'emotion': 'Amusement', 'intensity': '3', 'reason': "I don't know exactly what is happening, but the people in the photo seem happy.…	[{'emotion': 'Anger', 'intensity': '4', 'reason': 'how can a men do such things to his own wife!!', 'url': 'anonymous-source/all_shooting_images_newest/99.jpg'}, {'emotion': 'Sadness', 'intensity': '1', 'reason': 'There needs to be a welfare system that supports mental health. This is definitely a two-strategy battle. Ban guns and encourage mental healthiness. ', 'url': 'anonymous-source/all_shoo…
160	Robert Bowers arrest: Pittsburgh synagogue shooting suspect charged with 44 counts including hate crimes	anonymous-source/all_shooting_images_newest/110514.jpg	[{'emotion': 'Sadness', 'intensity': '4', 'reason': 'That they were able to don this for so long.'}, {'emotion': 'Awe', 'intensity': '2', 'reason': 'yes he should be '}, {'emotion': 'Sadness', 'intensity': '3', 'reason': 'the event was tragic and he deserves whats coming for him'}, {'emotion': 'Sadness', 'intensity': '4', 'reason': "I wish this didn't have to happen, and while I am glad justice i…	[{'emotion': 'Sadness', 'intensity': '2', 'reason': 'I did not know who the man was or his relation to gun violence until I looked him up. After looking him up, I felt sad because the story, along with other news about gun violence, made me feel hopeless.'}, {'emotion': 'Disgust', 'intensity': '1', 'reason': 'He might be a perpetrator of gun violence. '}, {'emotion': 'Fear', 'intensity': '3', 're…	[{'emotion': 'Contentment', 'intensity': '2', 'reason': "I feel this way because seeing people who have done wrong especially in regards to shooting and such get the justice they deserved is very satisfactory. I am cautious though because this only stated that he is a suspect instead of him being directly related to the shooting, so I'm cautious of how likely this guy might be the actual person b…
161	Donald Trump says Second Amendment 'will never be repealed' following ex-Supreme Court judge's comments	anonymous-source/all_shooting_images_newest/10022.jpg	[{'emotion': 'Sadness', 'intensity': '4', 'reason': 'It should be amended.'}, {'emotion': 'Disgust', 'intensity': '4', 'reason': 'he is correct but that is not the point '}, {'emotion': 'Contentment', 'intensity': '3', 'reason': 'he may be right, but he is still an ass'}, {'emotion': 'Disgust', 'intensity': '5', 'reason': 'I fundamentally disagree and Donald Trump is a psychopath '}, {'emotion': …	[{'emotion': 'Disgust', 'intensity': '4', 'reason': 'I feel like former president Trump did not do enough to stop gun violence.'}, {'emotion': 'Disgust', 'intensity': '5', 'reason': "He's spewed hatred and encouraged violence for years. "}, {'emotion': 'Sadness', 'intensity': '3', 'reason': 'it makes me sad how trump perceived himself'}, {'emotion': 'Disgust', 'intensity': '5', 'reason': "I don't…	[{'emotion': 'Anger', 'intensity': '2', 'reason': 'One of the core problems that lies with gun control and violence is that there are laws and governmental rules that directly support people using guns etc. I feel helpless because of the use of language by Donald Trump saying that it will "NEVER" be repealed, which means that there will unlikely be positive changes in the future.', 'url': 'anonym…
162	Advocates warn against linking mass shootings, mental illness after Trump tweet	anonymous-source/all_shooting_images_newest/10826.jpg	[{'emotion': 'Disgust', 'intensity': '5', 'reason': 'Not all shootings are linked to mental illness, it stigmatizes it.'}, {'emotion': 'Fear', 'intensity': '2', 'reason': 'why? and if there isnt a linkage that doesnt change the fact that those programs still need to be done'}, {'emotion': 'Contentment', 'intensity': '3', 'reason': 'mental illness should be linked to mass shootings'}, {'emotion': …	[{'emotion': 'Fear', 'intensity': '2', 'reason': "I feel like he is smirking, making me feel like he's hiding something."}, {'emotion': 'Disgust', 'intensity': '5', 'reason': "He's a piece of shit. "}, {'emotion': 'Disgust', 'intensity': '3', 'reason': 'his facial expression makes me feel disgusted because he looks disrespectful towards whoever is speaking'}, {'emotion': 'Disgust', 'intensity': '…	[{'emotion': 'Disgust', 'intensity': '3', 'reason': "In some ways, the things that Donald Trump says are influential to what the general public may feel, but I do understand what the advocates are saying here since you can't really attribute everyone's emotions to a tweet by Trump. Despite so, I feel disgusted because I know there are probably people out there who might take his tweets the wrong …
163	Trump Suggests Armed Guard Could Have Stopped Pittsburgh Synagogue Shooting	anonymous-source/all_shooting_images_newest/100266.jpg	[{'emotion': 'Anger', 'intensity': '5', 'reason': 'It would not have helped.'}, {'emotion': 'Disgust', 'intensity': '5', 'reason': 'maybe but thats not the point, it happened and it shouldnt have and it should be harder to get a gun '}, {'emotion': 'Sadness', 'intensity': '3', 'reason': 'saying something could have happened will not bring back the lives lost'}, {'emotion': 'Sadness', 'intensity':…	[{'emotion': 'Disgust', 'intensity': '2', 'reason': 'I think there a lot of people that support the man in the image.'}, {'emotion': 'Disgust', 'intensity': '5', 'reason': "Again, he's a horrible man. "}, {'emotion': 'Sadness', 'intensity': '3', 'reason': 'it makes me sad how many supported Trump has'}, {'emotion': 'Anger', 'intensity': '1', 'reason': "I don't like him but this photo didn't make …	[{'emotion': 'Anger', 'intensity': '4', 'reason': 'Saying such a thing right now is useless because it has already happened. Even though I do not remember exactly what happened that stopped the mass murder from continuing, but if armed guards could\'ve "stopped" the shooting, then why didn\'t they stop it in the first place and let it happen? Saying something like this is just extremely insensiti…
164	Senators want Facebook, Google to block access to 3D printed gun files	anonymous-source/all_shooting_images_newest/320.jpg	[{'emotion': 'Excitement', 'intensity': '4', 'reason': 'They should block them.'}, {'emotion': 'Excitement', 'intensity': '1', 'reason': 'yes, yes they should'}, {'emotion': 'Contentment', 'intensity': '3', 'reason': 'i understnad why they want this'}, {'emotion': 'Contentment', 'intensity': '2', 'reason': 'I am not sure what they are saying or what this means, I would have to read on to find out…	[{'emotion': 'Sadness', 'intensity': '1', 'reason': 'I feel like there is a lot of gun manufacturing in the US.'}, {'emotion': 'Anger', 'intensity': '2', 'reason': 'There is really no reason why we should be mass producing weapons for citizens. '}, {'emotion': 'Sadness', 'intensity': '3', 'reason': 'it makes me think of the profit people make off of guns and ammunations'}, {'emotion': 'Anger', 'i…	[{'emotion': 'Awe', 'intensity': '3', 'reason': "I feel awe because I actually never knew that 3D printed guns exist, aside from that, I feel understanding because I feel if internet access (google and Facebook, etc.) are limited to obtaining certain files, it may crack down on gun violence since it's limiting the general public's access to specific types of special weapons.", 'url': 'anonymous-s…
165	Klansman gets 4 years for firing gun at 'Unite the Right' rally	anonymous-source/all_shooting_images_newest/274.jpg	[{'emotion': 'Contentment', 'intensity': '5', 'reason': 'He deserves it.'}, {'emotion': 'Fear', 'intensity': '2', 'reason': 'yes he should, its a bit disgusting that it could ever been seen as acceptable '}, {'emotion': 'Fear', 'intensity': '3', 'reason': 'the fact that there are still klansman in this world is very scary'}, {'emotion': 'Fear', 'intensity': '4', 'reason': 'only 4 years for attemp…	[{'emotion': 'Fear', 'intensity': '4', 'reason': 'I feel like the man in the photo is harming someone with his firearm.'}, {'emotion': 'Anger', 'intensity': '4', 'reason': "Citizens shouldn't have such easy access to lethal weapons of any kind. "}, {'emotion': 'Fear', 'intensity': '3', 'reason': 'a white guy with a bandana, holding a gun scares me and i fear running into someone like this in real…	[{'emotion': 'Contentment', 'intensity': '3', 'reason': 'As mentioned previously, seeing people getting years of prisons being assigned to them because of firing shots and shootings gives me a sense of contentment. Despite so, I would need to know more information as to why was the gun fired to give further judgment of the piece of text and image.', 'url': 'anonymous-source/all_shooting_images_ne…
166	US military adds more than 4,000 names to gun background check database after Texas mass shooting	anonymous-source/all_shooting_images_newest/10461.jpg	[{'emotion': 'Contentment', 'intensity': '5', 'reason': 'More background checks are needed.'}, {'emotion': 'Sadness', 'intensity': '2', 'reason': 'good, it should be more robust anyway'}, {'emotion': 'Contentment', 'intensity': '3', 'reason': 'they are finally doing whats right'}, {'emotion': 'Contentment', 'intensity': '4', 'reason': 'Happy to see action being taken even in the most conservative…	[{'emotion': 'Sadness', 'intensity': '5', 'reason': 'death makes me sad.'}, {'emotion': 'Sadness', 'intensity': '3', 'reason': "It's sad that children have lost their lives. "}, {'emotion': 'Sadness', 'intensity': '3', 'reason': "it's sad because it reminds me of the church shooting"}, {'emotion': 'Sadness', 'intensity': '5', 'reason': "those people died for no reason/they weren't meant to die so…	[{'emotion': 'Sadness', 'intensity': '4', 'reason': "I feel sad because I feel like only 4000 suspects/names are not going to do anything to stop gun violence, and while its a step towards a good place, it won't stop further gun violence from happening in the future because the number of commitment is small, and there isn't any other changes that they are looking to reinforce in response of the m…
167	Melania Trump on Pittsburgh shooting: The violence needs to stop	anonymous-source/all_shooting_images_newest/100249.jpg	[{'emotion': 'Contentment', 'intensity': '3', 'reason': "Its good to see Trump's wife promoting peace."}, {'emotion': 'Disgust', 'intensity': '4', 'reason': 'yes it does but she doesnt care '}, {'emotion': 'Contentment', 'intensity': '3', 'reason': 'she is right but she has no ground to speak on, she needs to say more'}, {'emotion': 'Disgust', 'intensity': '4', 'reason': "She doesn't want violenc…	[{'emotion': 'Sadness', 'intensity': '3', 'reason': 'I feel like a lot of people get hurt from gun violence.'}, {'emotion': 'Sadness', 'intensity': '2', 'reason': "Obviously, someone has gotten hurt so that's sad. "}, {'emotion': 'Fear', 'intensity': '3', 'reason': "i'm scared that the ambulance is taking someone got shot to a hospital"}, {'emotion': 'Sadness', 'intensity': '4', 'reason': 'someon…	[{'emotion': 'Amusement', 'intensity': '2', 'reason': 'This is such a typical save-face statement that politicians may say, simply saying "oh the violence needs to be stopped" won\'t do anything to actually stop the violence. Instead of just talking, maybe they should instead look into taking actual actions that can help in controlling gun violence.', 'url': 'anonymous-source/all_shooting_images_…
168	White House weighs video game link to gun violence	anonymous-source/all_shooting_images_newest/10136.jpg	[{'emotion': 'Anger', 'intensity': '5', 'reason': 'It has been proven there is little to no link. '}, {'emotion': 'Disgust', 'intensity': '4', 'reason': 'whatever, there are so many studies saying that is not the case stop blaming anything but your own legislation'}, {'emotion': 'Contentment', 'intensity': '2', 'reason': 'i need more information on this matter'}, {'emotion': 'Contentment', 'inten…	[{'emotion': 'Anger', 'intensity': '2', 'reason': "I feel that people think video games cause violence and I believe they don't."}, {'emotion': 'Sadness', 'intensity': '1', 'reason': "None of the above emotions really, I don't think there is a valid connection between video games and gun violence. "}, {'emotion': 'Fear', 'intensity': '3', 'reason': "I'm scared how much video games will contribute…	[{'emotion': 'Anger', 'intensity': '4', 'reason': 'as an avid gamer myself, I have seen this exact same news headline for 5 years in a row already. Although I do agree to some extent that some video games may promote a violent image, or even provoke people to act violently but to say such a "broad" statement that dirties the entire video game industry truly angers me and makes me feel many negati…
169	Sia teams up with students to make awe-inspiring dance video with anti-gun violence message	anonymous-source/all_shooting_images_newest/100346.jpg	[{'emotion': 'Amusement', 'intensity': '3', 'reason': 'Its funny how out of touch some celebrities are.'}, {'emotion': 'Excitement', 'intensity': '1', 'reason': 'eh, good for them but it changes nothing '}, {'emotion': 'Contentment', 'intensity': '2', 'reason': 'it is nice that she is doing this but i think more direct action needs to be taken'}, {'emotion': 'Contentment', 'intensity': '3', 'reas…	[{'emotion': 'Sadness', 'intensity': '4', 'reason': "children aren't protected enough from gun violence."}, {'emotion': 'Sadness', 'intensity': '1', 'reason': 'Because these kids could be in danger?'}, {'emotion': 'Fear', 'intensity': '3', 'reason': "i'm scared for the children and what can possibly happen to them if a shooter shoots up their school"}, {'emotion': 'Sadness', 'intensity': '2', 're…	[{'emotion': 'Amusement', 'intensity': '4', 'reason': 'I don\'t think a simple "dance" video can help in preventing gun violence. While I know Sia probably comes from a good place, but would it really be useful in preventing gun violence? Therefore I find the whole situating amusing.', 'url': 'anonymous-source/all_shooting_images_newest/100346.jpg'}, {'emotion': 'Amusement', 'intensity': '2', 're…
170	Pittsburgh synagogue shooting suspect indicted on federal hate crime charges, faces 535 years	anonymous-source/all_shooting_images_newest/110518.jpg	[{'emotion': 'Contentment', 'intensity': '5', 'reason': 'He deserves it.'}, {'emotion': 'Excitement', 'intensity': '4', 'reason': 'he deserves it '}, {'emotion': 'Sadness', 'intensity': '3', 'reason': 'the event was tragic and he deserved what he got'}, {'emotion': 'Contentment', 'intensity': '4', 'reason': 'This person should not have the right to freedom again, they are a danger to society. '},…	[{'emotion': 'Anger', 'intensity': '4', 'reason': 'this person committed a crime that killed a lot of people.'}, {'emotion': 'Disgust', 'intensity': '1', 'reason': 'Same as before, he could be a perpetrator. '}, {'emotion': 'Fear', 'intensity': '3', 'reason': 'it makes me think of the shooters '}, {'emotion': 'Disgust', 'intensity': '4', 'reason': 'the guy looks like a killer'}, {'emotion': 'Disg…	[{'emotion': 'Contentment', 'intensity': '3', 'reason': "this guy got what he sowed. As an old saying once goes, you reap what you sow. I also find it slightly sad how even though he has caused so much sorrow during the mass shooting, he only needs to do 535 years, and it is likely that he will die before completing the whole sentence, therefore he couldn't truly live up to his sentence and pay f…
171	Watch Donald Trump, Marco Rubio, and Rick Scott Address the NRA	anonymous-source/all_shooting_images_newest/10027.jpg	[{'emotion': 'Anger', 'intensity': '1', 'reason': 'How are they addressing it?'}, {'emotion': 'Disgust', 'intensity': '5', 'reason': "no thanks a bunch of NRA sponsored idiots addressing other people's lives like they dont matter no thanks "}, {'emotion': 'Contentment', 'intensity': '3', 'reason': 'more information needs to be given to make a informed feeling'}, {'emotion': 'Disgust', 'intensity'…	[{'emotion': 'Disgust', 'intensity': '4', 'reason': "I feel like a lot of the people who support gun rights don't have a solution to gun violence."}, {'emotion': 'Disgust', 'intensity': '5', 'reason': "He's encouraged and helped the NRA to spew propaganda in favor of less gun control. "}, {'emotion': 'Anger', 'intensity': '3', 'reason': 'how trump helped the nra'}, {'emotion': 'Disgust', 'intensi…	[{'emotion': 'Amusement', 'intensity': '3', 'reason': "This news headline gives no specific information about what they might be talking about regarding that NRA, it's way too broad and I find that amusing since this news headline was basically useless.", 'url': 'anonymous-source/all_shooting_images_newest/10027.jpg'}, {'emotion': 'Disgust', 'intensity': '1', 'reason': 'I feel like its unrelated …
172	Donald Trump Jr. Uses YouTube Shooting To Make Incoherent Rant About The Left	anonymous-source/all_shooting_images_newest/10828.jpg	[{'emotion': 'Anger', 'intensity': '5', 'reason': 'He will use any opportunity to blame things on the left.'}, {'emotion': 'Disgust', 'intensity': '5', 'reason': 'of course he did'}, {'emotion': 'Disgust', 'intensity': '3', 'reason': 'he is an idiot who doesnt know what he is talking about'}, {'emotion': 'Disgust', 'intensity': '3', 'reason': 'Please shut up, no one wants to hear from you, DTJ. '…	[{'emotion': 'Disgust', 'intensity': '3', 'reason': "I don't like Donald Trump Jr. and the people he associates with."}, {'emotion': 'Disgust', 'intensity': '5', 'reason': 'No better than his father. '}, {'emotion': 'Anger', 'intensity': '3', 'reason': "I don't know much about trump jr in the context of gun violence"}, {'emotion': 'Disgust', 'intensity': '4', 'reason': "I really don't like the tr…	[{'emotion': 'Amusement', 'intensity': '2', 'reason': 'this is not out of ordinary for what Donald Trump might do in his everyday life.', 'url': 'anonymous-source/all_shooting_images_newest/10828.jpg'}, {'emotion': 'Anger', 'intensity': '2', 'reason': "I don't like such kind of behavior", 'url': 'anonymous-source/all_shooting_images_newest/10828.jpg'}, {'emotion': 'Excitement', 'intensity': '3', …
173	Trump looking into 3D guns, says he s consulting with NRA	anonymous-source/all_shooting_images_newest/347.jpg	[{'emotion': 'Fear', 'intensity': '3', 'reason': 'Probably means there will be more guns.'}, {'emotion': 'Disgust', 'intensity': '5', 'reason': 'mhm mhm ok ok, so nothing will change'}, {'emotion': 'Fear', 'intensity': '3', 'reason': 'trump and the nra are not a good combo'}, {'emotion': 'Fear', 'intensity': '4', 'reason': 'These two are menaces to American society. Could lead directly to more de…	[{'emotion': 'Fear', 'intensity': '1', 'reason': "I don't know what those tools are used for and there is nothing in the photo to make me feel any type of way."}, {'emotion': 'Sadness', 'intensity': '1', 'reason': 'Not sure what these are, toys? So not really any of the above feelings. '}, {'emotion': 'Fear', 'intensity': '3', 'reason': "this looks like a flair gun and there's japanese written in…	[{'emotion': 'Fear', 'intensity': '3', 'reason': "I thought there are already an abundant amount of guns in America, if Trump were to encourage people's use of 3D guns when looking into it, it will only further increase those who will own a gun in the future, and therefore put more people on the line and possibly promoting a dangerous culture.", 'url': 'anonymous-source/all_shooting_images_newest…
174	Outside NRA headquarters, protesters honor slain Parkland teen on his 18th birthday	anonymous-source/all_shooting_images_newest/294.jpg	[{'emotion': 'Sadness', 'intensity': '3', 'reason': 'The NRA will probably do nothing about it.'}, {'emotion': 'Sadness', 'intensity': '5', 'reason': 'this is just sad, this shouldnt be our reality'}, {'emotion': 'Contentment', 'intensity': '3', 'reason': 'its nice that they are sending a message to the nra'}, {'emotion': 'Awe', 'intensity': '4', 'reason': 'Happy to see action being taken followi…	[{'emotion': 'Contentment', 'intensity': '4', 'reason': 'I feel like there are a group of people that will stand up against injustices.'}, {'emotion': 'Sadness', 'intensity': '2', 'reason': "Parents shouldn't be dealing with a death of a child in any circumstance, but it must be especially painful in the case of school shootings. "}, {'emotion': 'Excitement', 'intensity': '3', 'reason': 'i hope t…	[{'emotion': 'Awe', 'intensity': '3', 'reason': 'I feel like what these protestors are doing are justified, those who have died due to gun violence needs to be remembered, because gun violence is something completely preventable if gun safety laws were looked into in the past.', 'url': 'anonymous-source/all_shooting_images_newest/294.jpg'}, {'emotion': 'Fear', 'intensity': '3', 'reason': 'its vio…
175	Rohrabacher s allegiance to the NRA is just another reason not to vote for him	anonymous-source/all_shooting_images_newest/10476.jpg	[{'emotion': 'Contentment', 'intensity': '4', 'reason': 'I agree.'}, {'emotion': 'Amusement', 'intensity': '5', 'reason': 'i mean agreed, but it doesnt change anything '}, {'emotion': 'Contentment', 'intensity': '3', 'reason': 'this is just the opinion of a few people and needs more information'}, {'emotion': 'Contentment', 'intensity': '3', 'reason': 'I agree with this statement. '}, {'emotion':…	[{'emotion': 'Sadness', 'intensity': '3', 'reason': 'the loss of a friend or family member is always sad to me.'}, {'emotion': 'Sadness', 'intensity': '2', 'reason': 'The death of a loved one is always sad.'}, {'emotion': 'Sadness', 'intensity': '3', 'reason': 'someone died in the context of gun violence and people are mourning as well'}, {'emotion': 'Sadness', 'intensity': '5', 'reason': 'that p…	[{'emotion': 'Amusement', 'intensity': '3', 'reason': 'I thought most politicians have an allegiance with the NRA, so to say someone specifically has allegiance with the NRA is funny to me since the reason is kind of dumb for people to not vote for this person.', 'url': 'anonymous-source/all_shooting_images_newest/10476.jpg'}, {'emotion': 'Sadness', 'intensity': '1', 'reason': 'do not care such k…
176	After Pittsburgh synagogue shooting, Squirrel Hill residents shaken but not surprised	anonymous-source/all_shooting_images_newest/100344.jpg	[{'emotion': 'Sadness', 'intensity': '5', 'reason': 'Shootings have become normal to many people.'}, {'emotion': 'Awe', 'intensity': '3', 'reason': 'yeop thats the feeling '}, {'emotion': 'Sadness', 'intensity': '3', 'reason': 'the world has come to such a tragic place as to where people are no longer surprised by acts like this'}, {'emotion': 'Contentment', 'intensity': '4', 'reason': 'I agree w…	[{'emotion': 'Fear', 'intensity': '2', 'reason': "I don't know what's going on exactly but emergency services make me feel like there is a sense of danger nearby."}, {'emotion': 'Sadness', 'intensity': '2', 'reason': "Someone is obviously hurt, so that's sad. "}, {'emotion': 'Fear', 'intensity': '3', 'reason': 'the soldier scared me as something horrible beyond police happened here'}, {'emotion':…	[{'emotion': 'Disgust', 'intensity': '4', 'reason': "saying a mass murder is not surprising is just way too insensitive. If it's not surprising then why didn't these people do anything in the first place to prevent it? If they have prevented it then many who have lost their lives could've very well been alive today, and to be this passive towards something that happens in your neighborhood, I'm t…
177	ShotSpotter, a gunshot detection system, goes live in Calumet City	anonymous-source/all_shooting_images_newest/10141.jpg	[{'emotion': 'Excitement', 'intensity': '4', 'reason': 'I am excited to see if it will work/be beneficial.'}, {'emotion': 'Fear', 'intensity': '3', 'reason': 'what is it and how will it work?'}, {'emotion': 'Contentment', 'intensity': '3', 'reason': 'not enough info in the title need more to form an opinion'}, {'emotion': 'Sadness', 'intensity': '4', 'reason': "Glad to see technology working to h…	[{'emotion': 'Contentment', 'intensity': '3', 'reason': 'I feel like emergency services can sometimes do a good job in a crisis.'}, {'emotion': 'Sadness', 'intensity': '1', 'reason': 'Not sure what the dots are for, so not really any of the above emotions. '}, {'emotion': 'Fear', 'intensity': '3', 'reason': 'it scares me how many 911 calls are in one small area'}, {'emotion': 'Fear', 'intensity':…	[{'emotion': 'Awe', 'intensity': '3', 'reason': 'I believe this is a step in the right direction in enforcing gun safety rules.', 'url': 'anonymous-source/all_shooting_images_newest/10141.jpg'}, {'emotion': 'Excitement', 'intensity': '3', 'reason': 'i expect the system to stop crimes', 'url': 'anonymous-source/all_shooting_images_newest/10141.jpg'}, {'emotion': 'Excitement', 'intensity': '4', 're…
178	New Jersey mom credited with stopping potential school shooting in Kentucky	anonymous-source/all_shooting_images_newest/100347.jpg	[{'emotion': 'Awe', 'intensity': '4', 'reason': 'I am impressed, but sad because she shouldnt have to do that.'}, {'emotion': 'Disgust', 'intensity': '5', 'reason': 'how and dont blame just her'}, {'emotion': 'Awe', 'intensity': '3', 'reason': 'it shows the power one person can have'}, {'emotion': 'Awe', 'intensity': '4', 'reason': 'What a badass, we need more people like her. '}, {'emotion': 'Co…	[{'emotion': 'Awe', 'intensity': '4', 'reason': 'I feel like the mom stopped a potential gun violence incident and she did it without needing a gun.'}, {'emotion': 'Sadness', 'intensity': '1', 'reason': "Don't know who this woman is or the context of the photo, so not really any of the above emotions. "}, {'emotion': 'Fear', 'intensity': '3', 'reason': "i don't know who this is but I'm guessing s…	[{'emotion': 'Awe', 'intensity': '4', 'reason': "I'm in awe of the bravery of this mother, and I'm thankful that no further deaths were caused by the potential shooting", 'url': 'anonymous-source/all_shooting_images_newest/100347.jpg'}, {'emotion': 'Excitement', 'intensity': '3', 'reason': "she's brave", 'url': 'anonymous-source/all_shooting_images_newest/100347.jpg'}, {'emotion': 'Amusement', 'i…
179	1 in 5 U.S. Gun Owners Use Drugs, Report Mental Health Condition: Survey	anonymous-source/all_shooting_images_newest/10843.jpg	[{'emotion': 'Anger', 'intensity': '4', 'reason': 'It feels hopeless.'}, {'emotion': 'Sadness', 'intensity': '4', 'reason': 'people who have a mental illness, such as a drug addiction, need help and should not have access to guns'}, {'emotion': 'Fear', 'intensity': '3', 'reason': "that's a scary statistic."}, {'emotion': 'Disgust', 'intensity': '2', 'reason': 'guns and drugs are all not good'}, {…	[{'emotion': 'Fear', 'intensity': '4', 'reason': "They aren't holding the guns properly and seem to be carelessly holding them. "}, {'emotion': 'Fear', 'intensity': '3', 'reason': "It's terrifying to see such large guns casually held. "}, {'emotion': 'Fear', 'intensity': '3', 'reason': "It's terrifying to see such large guns casually held. "}, {'emotion': 'Fear', 'intensity': '3', 'reason': 'why …	[{'emotion': 'Sadness', 'intensity': '3', 'reason': 'the system gives guns to people that are not always responsible ', 'url': 'anonymous-source/all_shooting_images_newest/10843.jpg'}, {'emotion': 'Disgust', 'intensity': '3', 'reason': 'drug overdose is also an important issue that needs attention ', 'url': 'anonymous-source/all_shooting_images_newest/10843.jpg'}, {'emotion': 'Anger', 'intensity'…
180	Trump's guns proposals to 'harden' schools	anonymous-source/all_shooting_images_newest/10220.jpg	[{'emotion': 'Fear', 'intensity': '3', 'reason': "I don't know what that means. "}, {'emotion': 'Disgust', 'intensity': '4', 'reason': 'schools should be a safe haven, not a place that needs to be hardened'}, {'emotion': 'Contentment', 'intensity': '3', 'reason': 'Trump has similar views I have on guns. '}, {'emotion': 'Contentment', 'intensity': '1', 'reason': 'a bit confused, but it seems to be…	[{'emotion': 'Disgust', 'intensity': '2', 'reason': "it looks staged and I'm not a fan of Trump. "}, {'emotion': 'Anger', 'intensity': '4', 'reason': 'the decisions made in that room seems dangerous and unsafe. '}, {'emotion': 'Anger', 'intensity': '4', 'reason': 'the decisions made in that room seems dangerous and unsafe. '}, {'emotion': 'Anger', 'intensity': '3', 'reason': 'as President, he can…	[{'emotion': 'Disgust', 'intensity': '3', 'reason': "i do not agree with what he's saying", 'url': 'anonymous-source/all_shooting_images_newest/10220.jpg'}, {'emotion': 'Fear', 'intensity': '3', 'reason': '"harden school" can not fix the fundamental problems and will leave students in fear ', 'url': 'anonymous-source/all_shooting_images_newest/10220.jpg'}, {'emotion': 'Amusement', 'intensity': '3…
181	Betsy DeVos considers allowing schools to use federal funds to buy guns	anonymous-source/all_shooting_images_newest/233.jpg	[{'emotion': 'Disgust', 'intensity': '4', 'reason': 'It seems like the most backwards way to deal with school shootings. '}, {'emotion': 'Anger', 'intensity': '4', 'reason': 'it is awful that we have come to this'}, {'emotion': 'Contentment', 'intensity': '3', 'reason': 'I think this could be a step in the right direction. '}, {'emotion': 'Contentment', 'intensity': '2', 'reason': 'can help the s…	[{'emotion': 'Amusement', 'intensity': '2', 'reason': "She looks like she wouldn't be nice."}, {'emotion': 'Anger', 'intensity': '4', 'reason': "she doesn't deserver her position. Her policies don't protect the kids "}, {'emotion': 'Anger', 'intensity': '4', 'reason': "she doesn't deserver her position. Her policies don't protect the kids "}, {'emotion': 'Awe', 'intensity': '1', 'reason': 'i dont…	[{'emotion': 'Disgust', 'intensity': '5', 'reason': 'its stupid ', 'url': 'anonymous-source/all_shooting_images_newest/233.jpg'}, {'emotion': 'Fear', 'intensity': '3', 'reason': 'schools should never be the place where teachers or guards need to carry guns around ', 'url': 'anonymous-source/all_shooting_images_newest/233.jpg'}, {'emotion': 'Amusement', 'intensity': '3', 'reason': "I feel amusemen…
182	Democratic wins could mean state action on health care, guns	anonymous-source/all_shooting_images_newest/110379.jpg	[{'emotion': 'Amusement', 'intensity': '3', 'reason': 'Democratic wins have done practically nothing to change gun policy in America. This makes me feel like I will believe it when I see it. '}, {'emotion': 'Excitement', 'intensity': '4', 'reason': 'we finally need politicians who can help us achieve our goals'}, {'emotion': 'Fear', 'intensity': '3', 'reason': 'democrats have bad policies.'}, {'e…	[{'emotion': 'Excitement', 'intensity': '4', 'reason': 'they are celebrating. '}, {'emotion': 'Contentment', 'intensity': '3', 'reason': 'Seems celebratory. Joe Biden for president seems a little more soothing. '}, {'emotion': 'Contentment', 'intensity': '3', 'reason': 'Seems celebratory. Joe Biden for president seems a little more soothing. '}, {'emotion': 'Amusement', 'intensity': '3', 'reason'…	[{'emotion': 'Contentment', 'intensity': '3', 'reason': 'Its a good decision ', 'url': 'anonymous-source/all_shooting_images_newest/110379.jpg'}, {'emotion': 'Excitement', 'intensity': '3', 'reason': 'government should take more actions ', 'url': 'anonymous-source/all_shooting_images_newest/110379.jpg'}, {'emotion': 'Contentment', 'intensity': '3', 'reason': "It's a good thing if states can take …
183	Dems fear overreach as left presses assault weapon ban	anonymous-source/all_shooting_images_newest/10065.jpg	[{'emotion': 'Sadness', 'intensity': '4', 'reason': 'It feels hopeless. '}, {'emotion': 'Sadness', 'intensity': '4', 'reason': 'an assault weapon ban should not be deemed as overreach'}, {'emotion': 'Amusement', 'intensity': '3', 'reason': 'dems have been overreaching for a while now already'}, {'emotion': 'Amusement', 'intensity': '3', 'reason': 'it can reduce the gun violence'}, {'emotion': 'Fe…	[{'emotion': 'Anger', 'intensity': '4', 'reason': 'gun purchasing should be more regulated than this.'}, {'emotion': 'Fear', 'intensity': '3', 'reason': 'The fact that guns are sold so casually is concerning and scary. '}, {'emotion': 'Fear', 'intensity': '3', 'reason': 'The fact that guns are sold so casually is concerning and scary. '}, {'emotion': 'Disgust', 'intensity': '4', 'reason': 'guns s…	[{'emotion': 'Contentment', 'intensity': '3', 'reason': 'good decision to ban them', 'url': 'anonymous-source/all_shooting_images_newest/10065.jpg'}, {'emotion': 'Fear', 'intensity': '3', 'reason': 'it scared to see how more people might buy gun ', 'url': 'anonymous-source/all_shooting_images_newest/10065.jpg'}, {'emotion': 'Contentment', 'intensity': '3', 'reason': 'Although I think the United S…
184	Florida School Shooting Survivors March on State Capital to Urge Gun Control Reform	anonymous-source/all_shooting_images_newest/10280.jpg	[{'emotion': 'Excitement', 'intensity': '4', 'reason': 'I want to feel hopeful.'}, {'emotion': 'Awe', 'intensity': '4', 'reason': 'it is amazing what these shooting survivors are doing to try and better this world'}, {'emotion': 'Excitement', 'intensity': '3', 'reason': "im excited they are using their voices to take action even if I don't agree with them on everything"}, {'emotion': 'Excitement'…	[{'emotion': 'Contentment', 'intensity': '4', 'reason': 'automatic guns should not be legal.'}, {'emotion': 'Sadness', 'intensity': '3', 'reason': "Banning guns is in the right direction somewhat. But the message isn't steong enough. its sad."}, {'emotion': 'Sadness', 'intensity': '3', 'reason': "Banning guns is in the right direction somewhat. But the message isn't steong enough. its sad."}, {'e…	[{'emotion': 'Awe', 'intensity': '3', 'reason': 'its good to see them taking a stand and spreading awareness ', 'url': 'anonymous-source/all_shooting_images_newest/10280.jpg'}, {'emotion': 'Excitement', 'intensity': '3', 'reason': "I think there's the need to protest for gun control ", 'url': 'anonymous-source/all_shooting_images_newest/10280.jpg'}, {'emotion': 'Excitement', 'intensity': '3', 're…
185	PayPal bans Gab in wake of Pittsburgh mass shooting	anonymous-source/all_shooting_images_newest/100225.jpg	[{'emotion': 'Contentment', 'intensity': '3', 'reason': 'someone is being held accountable even in the smallest way. '}, {'emotion': 'Contentment', 'intensity': '4', 'reason': 'it is good when companies ban bad things'}, {'emotion': 'Sadness', 'intensity': '3', 'reason': "I don't know what Gab is"}, {'emotion': 'Contentment', 'intensity': '2', 'reason': 'this method can reduce gun violence some w…	[{'emotion': 'Sadness', 'intensity': '2', 'reason': 'They are grieving'}, {'emotion': 'Sadness', 'intensity': '3', 'reason': 'I feel as though they are praying peacfully for lost victims'}, {'emotion': 'Sadness', 'intensity': '3', 'reason': 'I feel as though they are praying peacfully for lost victims'}, {'emotion': 'Sadness', 'intensity': '3', 'reason': 'guns lead to more violence and sadness'},…	[{'emotion': 'Contentment', 'intensity': '3', 'reason': 'its good to see them taking a stand ', 'url': 'anonymous-source/all_shooting_images_newest/100225.jpg'}, {'emotion': 'Contentment', 'intensity': '3', 'reason': 'there should be a certain punishment ', 'url': 'anonymous-source/all_shooting_images_newest/100225.jpg'}, {'emotion': 'Amusement', 'intensity': '3', 'reason': 'I think it is also ir…
186	Two ways to curb gun violence: Smaller clips and classes	anonymous-source/all_shooting_images_newest/10505.jpg	[{'emotion': 'Amusement', 'intensity': '4', 'reason': 'it could work. Maybe it is a compromise. '}, {'emotion': 'Sadness', 'intensity': '4', 'reason': 'class sizes should not have to be manipulated to stop gun violence, laws should be made'}, {'emotion': 'Contentment', 'intensity': '3', 'reason': 'there could be two ways to curb gun violence'}, {'emotion': 'Sadness', 'intensity': '2', 'reason': '…	[{'emotion': 'Sadness', 'intensity': '2', 'reason': 'School shootings.'}, {'emotion': 'Fear', 'intensity': '5', 'reason': "School is supposed to be a fun and fundamental part of a child's growth. For this to be a battlefield is so so so sad, scary, and wrong. "}, {'emotion': 'Fear', 'intensity': '5', 'reason': "School is supposed to be a fun and fundamental part of a child's growth. For this to b…	[{'emotion': 'Contentment', 'intensity': '3', 'reason': 'people would be aware', 'url': 'anonymous-source/all_shooting_images_newest/10505.jpg'}, {'emotion': 'Contentment', 'intensity': '3', 'reason': 'love to know more about the classes ', 'url': 'anonymous-source/all_shooting_images_newest/10505.jpg'}, {'emotion': 'Contentment', 'intensity': '3', 'reason': 'I agree with this approach very much.…
187	Inspired by Gaza Killings, Ann Coulter Proposes Shooting Immigrants Trying to Cross U.S. Border Illegally	anonymous-source/all_shooting_images_newest/10591.jpg	[{'emotion': 'Disgust', 'intensity': '5', 'reason': 'that is so terrible and a gross use of power. '}, {'emotion': 'Anger', 'intensity': '5', 'reason': 'Immigrants are just trying to start a new life, often away from the dangers of their home country. Shooting and killing innocent people is murder. She is proposing murder.'}, {'emotion': 'Sadness', 'intensity': '3', 'reason': "that's an awful thi…	[{'emotion': 'Disgust', 'intensity': '2', 'reason': "she isn't a good person"}, {'emotion': 'Sadness', 'intensity': '3', 'reason': 'I dont know her'}, {'emotion': 'Sadness', 'intensity': '3', 'reason': 'I dont know her'}, {'emotion': 'Anger', 'intensity': '3', 'reason': 'she advocates for more people need firearms '}, {'emotion': 'Anger', 'intensity': '4', 'reason': 'I hate Anne Coulter. I disagr…	[{'emotion': 'Anger', 'intensity': '3', 'reason': 'that is so stupid', 'url': 'anonymous-source/all_shooting_images_newest/10591.jpg'}, {'emotion': 'Sadness', 'intensity': '3', 'reason': "it's inhumane to kill those people even if they are illegal immigrants ", 'url': 'anonymous-source/all_shooting_images_newest/10591.jpg'}, {'emotion': 'Anger', 'intensity': '3', 'reason': 'I think this will lead…
188	Mass shootings 'increasing'and pose'most serious threat' in US, expert says	anonymous-source/all_shooting_images_newest/110490.jpg	[{'emotion': 'Fear', 'intensity': '4', 'reason': 'I feel scared for my life in places I should not, like the grocery store or the movie theaters. '}, {'emotion': 'Fear', 'intensity': '4', 'reason': 'I am scared that I will be a victim next'}, {'emotion': 'Fear', 'intensity': '3', 'reason': "it's something everyone has to worry about."}, {'emotion': 'Anger', 'intensity': '3', 'reason': 'it notify …	[{'emotion': 'Sadness', 'intensity': '2', 'reason': 'they are sad'}, {'emotion': 'Sadness', 'intensity': '3', 'reason': "I feel bad for this person. But I don't know what's happening. "}, {'emotion': 'Sadness', 'intensity': '3', 'reason': "I feel bad for this person. But I don't know what's happening. "}, {'emotion': 'Fear', 'intensity': '3', 'reason': 'school shootings happen so often when it sh…	[{'emotion': 'Fear', 'intensity': '3', 'reason': 'I agree and it can happen anywhere', 'url': 'anonymous-source/all_shooting_images_newest/110490.jpg'}, {'emotion': 'Fear', 'intensity': '3', 'reason': "people are really worried about their danger and society shouldn't be like this ", 'url': 'anonymous-source/all_shooting_images_newest/110490.jpg'}, {'emotion': 'Fear', 'intensity': '3', 'reason': …
189	Ban assault weapons, buy them back, go after resisters: Ex-prosecutor in Congress	anonymous-source/all_shooting_images_newest/10883.jpg	[{'emotion': 'Fear', 'intensity': '2', 'reason': "I don't understand what is being proposed."}, {'emotion': 'Sadness', 'intensity': '4', 'reason': "people won't focus on the simple solution: make new legislation"}, {'emotion': 'Fear', 'intensity': '3', 'reason': "I don't know I'm slightly confused by the headline."}, {'emotion': 'Awe', 'intensity': '3', 'reason': 'the government is doing things t…	[{'emotion': 'Anger', 'intensity': '4', 'reason': 'nobody should be celebrated for committing treason. '}, {'emotion': 'Fear', 'intensity': '3', 'reason': 'WHY is he holding a gun at a public place? And so casually too!'}, {'emotion': 'Fear', 'intensity': '3', 'reason': 'WHY is he holding a gun at a public place? And so casually too!'}, {'emotion': 'Anger', 'intensity': '4', 'reason': 'this looks…	[{'emotion': 'Fear', 'intensity': '3', 'reason': 'neutral about it', 'url': 'anonymous-source/all_shooting_images_newest/10883.jpg'}, {'emotion': 'Fear', 'intensity': '3', 'reason': 'gun violence might never end ', 'url': 'anonymous-source/all_shooting_images_newest/10883.jpg'}, {'emotion': 'Contentment', 'intensity': '3', 'reason': 'The most efficient way to avoid shooting cases is ban assault w…
190	Ex-GOP rep.: Leftist groups could hijack shooting victims' grief	anonymous-source/all_shooting_images_newest/10226.jpg	[{'emotion': 'Anger', 'intensity': '4', 'reason': "shooting victims' grief could be exacerbated by the government's failure to police guns properly. "}, {'emotion': 'Disgust', 'intensity': '5', 'reason': "to make somebody's grief part of your political agenda is disgusting"}, {'emotion': 'Sadness', 'intensity': '3', 'reason': "that a leftist group would hijack shooting victims' grief to push thei…	[{'emotion': 'Amusement', 'intensity': '2', 'reason': "The media doesn't do a good job of conveying the severity of gun violence. "}, {'emotion': 'Sadness', 'intensity': '3', 'reason': 'I dont know him'}, {'emotion': 'Sadness', 'intensity': '3', 'reason': 'I dont know him'}, {'emotion': 'Awe', 'intensity': '3', 'reason': 'i dont know who this is'}, {'emotion': 'Contentment', 'intensity': '1', 're…	[{'emotion': 'Disgust', 'intensity': '3', 'reason': 'it just seems selfish', 'url': 'anonymous-source/all_shooting_images_newest/10226.jpg'}, {'emotion': 'Disgust', 'intensity': '3', 'reason': ' ', 'url': 'anonymous-source/all_shooting_images_newest/10226.jpg'}, {'emotion': 'Contentment', 'intensity': '3', 'reason': 'just as I mentioned in the previous question, I really think this approach will …
191	Paulette Jordan, Idaho horse-riding, gun-owning Democrat running for governor	anonymous-source/all_shooting_images_newest/244.jpg	[{'emotion': 'Sadness', 'intensity': '4', 'reason': 'There is no hope.'}, {'emotion': 'Sadness', 'intensity': '3', 'reason': "I don't think people need to be owning guns"}, {'emotion': 'Excitement', 'intensity': '3', 'reason': 'she sounds like more of a moderate. '}, {'emotion': 'Fear', 'intensity': '4', 'reason': 'it will make the society with more guns'}, {'emotion': 'Amusement', 'intensity': '…	[{'emotion': 'Contentment', 'intensity': '2', 'reason': 'she looks like a cool cowboy'}, {'emotion': 'Contentment', 'intensity': '3', 'reason': 'This image is very aesthetically pleasing and beautiful. '}, {'emotion': 'Contentment', 'intensity': '3', 'reason': 'This image is very aesthetically pleasing and beautiful. '}, {'emotion': 'Awe', 'intensity': '3', 'reason': 'not sure what this picture m…	[{'emotion': 'Fear', 'intensity': '3', 'reason': "I don't know whats happening", 'url': 'anonymous-source/all_shooting_images_newest/244.jpg'}, {'emotion': 'Awe', 'intensity': '3', 'reason': ' which way this would go ', 'url': 'anonymous-source/all_shooting_images_newest/244.jpg'}, {'emotion': 'Awe', 'intensity': '3', 'reason': "I don't think the gun owner should be deprived of the right to run f…
192	Trump blames Thousand Oaks shooting on ex-Marine's PTSD	anonymous-source/all_shooting_images_newest/110383.jpg	[{'emotion': 'Anger', 'intensity': '4', 'reason': 'it should be blamed on the system that allowed an individual suffering from PTSD the right to a gun.'}, {'emotion': 'Anger', 'intensity': '4', 'reason': "while the ex marine's PTSD is sad, the reason for this shooting is because he had access to a gun."}, {'emotion': 'Sadness', 'intensity': '3', 'reason': "you can't just blame it on his PTSD."}, …	[{'emotion': 'Disgust', 'intensity': '4', 'reason': "I don't agree with his policies."}, {'emotion': 'Sadness', 'intensity': '3', 'reason': 'He is is giving a speech on something. '}, {'emotion': 'Sadness', 'intensity': '3', 'reason': 'He is is giving a speech on something. '}, {'emotion': 'Anger', 'intensity': '4', 'reason': 'as President, he can do better when it comes to gun control policies b…	[{'emotion': 'Fear', 'intensity': '3', 'reason': 'I do agree that pdsd could influence actions but the ease to follow through is the problem', 'url': 'anonymous-source/all_shooting_images_newest/110383.jpg'}, {'emotion': 'Anger', 'intensity': '3', 'reason': 'that is clearly not the reason, and Trump is finding excuses ', 'url': 'anonymous-source/all_shooting_images_newest/110383.jpg'}, {'emotion'…
193	As immigrants flow across US border, American guns go south	anonymous-source/all_shooting_images_newest/90158.jpg	[{'emotion': 'Fear', 'intensity': '4', 'reason': 'what does that mean.'}, {'emotion': 'Sadness', 'intensity': '4', 'reason': "immigrants are innocent people, they don't need to be violently attacked"}, {'emotion': 'Sadness', 'intensity': '3', 'reason': "American's are nervous about illegal, non-vetted immigrants as they have the right to be. If they are just flooding through the border there are …	[{'emotion': 'Anger', 'intensity': '4', 'reason': 'these weapons have caused so much destruction.'}, {'emotion': 'Fear', 'intensity': '3', 'reason': 'Those are guns that are used to hurt people. '}, {'emotion': 'Fear', 'intensity': '3', 'reason': 'Those are guns that are used to hurt people. '}, {'emotion': 'Fear', 'intensity': '4', 'reason': 'everybody got guns and no one is truly safe'}, {'emot…	[{'emotion': 'Fear', 'intensity': '3', 'reason': 'thats going to make it worse', 'url': 'anonymous-source/all_shooting_images_newest/90158.jpg'}, {'emotion': 'Fear', 'intensity': '3', 'reason': 'think of how many immigrants would actually die and their family and children in the US ', 'url': 'anonymous-source/all_shooting_images_newest/90158.jpg'}, {'emotion': 'Disgust', 'intensity': '3', 'reason…
194	Thousands head to DC for gun control protest Video	anonymous-source/all_shooting_images_newest/10302.jpg	[{'emotion': 'Excitement', 'intensity': '4', 'reason': 'I want to protest for gun control too. '}, {'emotion': 'Excitement', 'intensity': '4', 'reason': 'it is exciting how many people are trying to enact change'}, {'emotion': 'Contentment', 'intensity': '3', 'reason': 'they are using their first amendment right to protest. '}, {'emotion': 'Awe', 'intensity': '2', 'reason': 'they are encourage an…	[{'emotion': 'Sadness', 'intensity': '2', 'reason': 'kids have to worry about their school being a safe place. '}, {'emotion': 'Sadness', 'intensity': '3', 'reason': 'I feel sad but empowered for them'}, {'emotion': 'Sadness', 'intensity': '3', 'reason': 'I feel sad but empowered for them'}, {'emotion': 'Sadness', 'intensity': '3', 'reason': 'guns should not be anywhere near schools'}, {'emotion'…	[{'emotion': 'Contentment', 'intensity': '3', 'reason': 'its good to see them taking a stand and spreading awareness ', 'url': 'anonymous-source/all_shooting_images_newest/10302.jpg'}, {'emotion': 'Excitement', 'intensity': '3', 'reason': 'to see students are doing the right thing for community ', 'url': 'anonymous-source/all_shooting_images_newest/10302.jpg'}, {'emotion': 'Contentment', 'intensi…
195	Muslim groups raise money for victims after Pittsburgh synagogue shooting	anonymous-source/all_shooting_images_newest/100230.jpg	[{'emotion': 'Contentment', 'intensity': '4', 'reason': 'people are coming together to support those affected by such a terribly tragic event. '}, {'emotion': 'Awe', 'intensity': '4', 'reason': "while the situation is so sad, it is great seeing different groups raising money for other group's tragedies"}, {'emotion': 'Contentment', 'intensity': '3', 'reason': "that's an extremely nice thing that …	[{'emotion': 'Sadness', 'intensity': '4', 'reason': "so many people die when they don't have to. "}, {'emotion': 'Sadness', 'intensity': '3', 'reason': 'Sad but peaceful for the lost ones'}, {'emotion': 'Sadness', 'intensity': '3', 'reason': 'Sad but peaceful for the lost ones'}, {'emotion': 'Sadness', 'intensity': '5', 'reason': 'school shootings are tragic events'}, {'emotion': 'Sadness', 'inte…	[{'emotion': 'Awe', 'intensity': '3', 'reason': 'its good to see people making an initiative and helping', 'url': 'anonymous-source/all_shooting_images_newest/100230.jpg'}, {'emotion': 'Contentment', 'intensity': '3', 'reason': "it's sad to see this but happy that people show their low ", 'url': 'anonymous-source/all_shooting_images_newest/100230.jpg'}, {'emotion': 'Sadness', 'intensity': '3', 'r…
196	1 student injured in Florida high school shooting amid national walkouts over gun violence	anonymous-source/all_shooting_images_newest/10547.jpg	[{'emotion': 'Sadness', 'intensity': '4', 'reason': 'it makes me feel like it will never stop. '}, {'emotion': 'Sadness', 'intensity': '4', 'reason': 'it seems like everyday there is a new shooting'}, {'emotion': 'Sadness', 'intensity': '3', 'reason': 'a person was injured'}, {'emotion': 'Awe', 'intensity': '3', 'reason': 'gun violence is so bad'}, {'emotion': 'Sadness', 'intensity': '4', 'reason…	[{'emotion': 'Sadness', 'intensity': '4', 'reason': 'kids should look at school as a safe space.'}, {'emotion': 'Sadness', 'intensity': '5', 'reason': 'so sad the students have to go through a drill fo rhtis and that school shooting is a very large issue'}, {'emotion': 'Sadness', 'intensity': '5', 'reason': 'so sad the students have to go through a drill fo rhtis and that school shooting is a ver…	[{'emotion': 'Sadness', 'intensity': '3', 'reason': 'I feel bad for everyone that has been affected', 'url': 'anonymous-source/all_shooting_images_newest/10547.jpg'}, {'emotion': 'Fear', 'intensity': '3', 'reason': "student's life can actually be in danger ", 'url': 'anonymous-source/all_shooting_images_newest/10547.jpg'}, {'emotion': 'Fear', 'intensity': '3', 'reason': 'This news makes me feel t…
197	Trump's comments leave gun debate paused in Congress	anonymous-source/all_shooting_images_newest/10595.jpg	[{'emotion': 'Sadness', 'intensity': '4', 'reason': 'it makes me frustrated '}, {'emotion': 'Anger', 'intensity': '4', 'reason': 'Trump is not allowing for progress'}, {'emotion': 'Sadness', 'intensity': '3', 'reason': "there's so much disagreement on this topic"}, {'emotion': 'Anger', 'intensity': '2', 'reason': 'we should try to ban the gun'}, {'emotion': 'Anger', 'intensity': '3', 'reason': 'a…	[{'emotion': 'Anger', 'intensity': '4', 'reason': "they have the power to enact meaningful policy change and they don't."}, {'emotion': 'Sadness', 'intensity': '3', 'reason': 'I dont know these people'}, {'emotion': 'Sadness', 'intensity': '3', 'reason': 'I dont know these people'}, {'emotion': 'Excitement', 'intensity': '3', 'reason': 'he advocates for more background checks on private gun sales…	[{'emotion': 'Disgust', 'intensity': '3', 'reason': 'He just seems insensitive ', 'url': 'anonymous-source/all_shooting_images_newest/10595.jpg'}, {'emotion': 'Anger', 'intensity': '3', 'reason': 'These is the issues congress should pay attention to ', 'url': 'anonymous-source/all_shooting_images_newest/10595.jpg'}, {'emotion': 'Amusement', 'intensity': '3', 'reason': 'government should do things…
198	We have to learn from history : Sex therapist Dr. Ruth speaks out about synagogue shooting, holocaust deniers	anonymous-source/all_shooting_images_newest/110495.jpg	[{'emotion': 'Fear', 'intensity': '3', 'reason': 'What does this mean. '}, {'emotion': 'Sadness', 'intensity': '4', 'reason': 'It is sad to see how history is repeating itself'}, {'emotion': 'Sadness', 'intensity': '3', 'reason': 'the synagogue shooting should have never happened'}, {'emotion': 'Awe', 'intensity': '2', 'reason': 'she is doing her best to reduce the gun violence'}, {'emotion': 'Am…	[{'emotion': 'Sadness', 'intensity': '2', 'reason': "I'm not sure how she relates to gun violence. "}, {'emotion': 'Sadness', 'intensity': '3', 'reason': 'I dont know her'}, {'emotion': 'Sadness', 'intensity': '3', 'reason': 'I dont know her'}, {'emotion': 'Awe', 'intensity': '1', 'reason': 'i dont know who this is'}, {'emotion': 'Sadness', 'intensity': '1', 'reason': "I do not know who this woma…	[{'emotion': 'Contentment', 'intensity': '3', 'reason': 'I do agree with her a little bit.', 'url': 'anonymous-source/all_shooting_images_newest/110495.jpg'}, {'emotion': 'Sadness', 'intensity': '3', 'reason': "it's sad to see the tragedy happen over again ", 'url': 'anonymous-source/all_shooting_images_newest/110495.jpg'}, {'emotion': 'Contentment', 'intensity': '3', 'reason': 'This presenter se…
199	Some wanted shooting suspect forcibly committed in 2016	anonymous-source/all_shooting_images_newest/10693.jpg	[{'emotion': 'Sadness', 'intensity': '3', 'reason': 'I am conflicted about the word "forcibly" being used because this could mean that a suspect might have been committed without a fair trial. At the same time, if the suspect is undoubtedly the shooter, then I am sad because of how many shootings are happening in America.'}, {'emotion': 'Sadness', 'intensity': '4', 'reason': 'I wonder what stood …	[{'emotion': 'Anger', 'intensity': '1', 'reason': 'anger because I know this man has taken innocent lives but its mild because this picture leads me to assume that he is being prosecuted'}, {'emotion': 'Sadness', 'intensity': '5', 'reason': 'people waste their lives by doing illegal things'}, {'emotion': 'Anger', 'intensity': '4', 'reason': 'Because of these situations, I have to be very careful …	[{'emotion': 'Fear', 'intensity': '4', 'reason': 'how did this young boy come to where is today? How did he become murderer? What went wrong?', 'url': 'anonymous-source/all_shooting_images_newest/10693.jpg'}, {'emotion': 'Disgust', 'intensity': '4', 'reason': "it made me feel disgusted with society, I feel disappointed, angry but mostly disgusted because many innocent people die because of gun vi…
200	Students call for action after Florida school mass shooting	anonymous-source/all_shooting_images_newest/10015.jpg	[{'emotion': 'Anger', 'intensity': '3', 'reason': "It's ridiculous that students are the ones who have to call for action. Instead, Government Officials should stop being complacent and start addressing the problem."}, {'emotion': 'Awe', 'intensity': '4', 'reason': 'I am proud of these students and their courage '}, {'emotion': 'Contentment', 'intensity': '4', 'reason': 'it shows me that people c…	[{'emotion': 'Sadness', 'intensity': '2', 'reason': 'I can imagine these students are speaking about gun violence and no child should even have to know what that is'}, {'emotion': 'Contentment', 'intensity': '3', 'reason': 'no emotion detected'}, {'emotion': 'Sadness', 'intensity': '3', 'reason': 'Because with gun violence, people will inevitably be injured or even killed.'}, {'emotion': 'Sadness…	[{'emotion': 'Sadness', 'intensity': '2', 'reason': "Teens experience a lot, but to have to see your friends die. That's just so sad and unbearable. ", 'url': 'anonymous-source/all_shooting_images_newest/10015.jpg'}, {'emotion': 'Contentment', 'intensity': '3', 'reason': 'It does content me, makes me happy to see kids fighting and calling for action but I cannot say that the intensity of my feeli…
201	South Carolina lawmaker pulls out loaded gun during constituent meeting, audience says	anonymous-source/all_shooting_images_newest/10381.jpg	[{'emotion': 'Disgust', 'intensity': '4', 'reason': 'There is no reason why a gun should be pulled out at a meeting.'}, {'emotion': 'Fear', 'intensity': '4', 'reason': 'We have put the wrong people in power'}, {'emotion': 'Fear', 'intensity': '4', 'reason': "I can't believe a lawyer would actually do that. Lawyers are taught how to follow the law and should be the ones upholding the law. The fact…	[{'emotion': 'Disgust', 'intensity': '1', 'reason': 'this man is probably supporting gun ownership and not doing anything to fix the problem'}, {'emotion': 'Contentment', 'intensity': '3', 'reason': 'no emotion detected'}, {'emotion': 'Fear', 'intensity': '3', 'reason': 'Under national control, gun violence still often occurs, which makes me feel scared.'}, {'emotion': 'Fear', 'intensity': '2', '…	[{'emotion': 'Disgust', 'intensity': '4', 'reason': 'What kind of world are we living in? What happened to civilized conversations, order, and communciation?', 'url': 'anonymous-source/all_shooting_images_newest/10381.jpg'}, {'emotion': 'Anger', 'intensity': '5', 'reason': 'what is he trying to prove? Guns should not be out in the public and did he stopped to think about triggering the audience? …
202	WATCH: Justice Department didn t consult Trump on 3D-printed guns, White House says	anonymous-source/all_shooting_images_newest/451.jpg	[{'emotion': 'Anger', 'intensity': '4', 'reason': "Any time I see Trump's name it makes me angry."}, {'emotion': 'Contentment', 'intensity': '4', 'reason': "Trump doesn't deserve to be consulted"}, {'emotion': 'Sadness', 'intensity': '2', 'reason': 'the Justice Department should be obligated to consult the president on issues regarding guns such as gun laws and gun control. The controversial issu…	[{'emotion': 'Disgust', 'intensity': '2', 'reason': 'she is also probably not doing anything to control gun ownership and the US has such a problem that change needs to happen'}, {'emotion': 'Contentment', 'intensity': '3', 'reason': 'no emotion detected'}, {'emotion': 'Fear', 'intensity': '3', 'reason': 'Under national control, gun violence still often occurs, which makes me feel scared.'}, {'em…	[{'emotion': 'Awe', 'intensity': '3', 'reason': "her face and the finger it's just funny looking", 'url': 'anonymous-source/all_shooting_images_newest/451.jpg'}, {'emotion': 'Fear', 'intensity': '3', 'reason': 'Even Trump said that it makes no sense. untraceable guns are so dangerous it incetivates violance and makes it easier for criminals. No one is safe and it will always be worse for minoriti…
203	Las Vegas gunman became unstable but didn't raise suspicions	anonymous-source/all_shooting_images_newest/116.jpg	[{'emotion': 'Fear', 'intensity': '3', 'reason': 'Mental health issues in America are not addressed well and it shows through the high amounts of unhappy people in the US and those who are mentally unstable enough to do a mass shooting.'}, {'emotion': 'Anger', 'intensity': '4', 'reason': 'How did no one do anything about this?'}, {'emotion': 'Fear', 'intensity': '4', 'reason': 'people who are uns…	[{'emotion': 'Disgust', 'intensity': '1', 'reason': 'he probably also is supporting widespread gun ownership which I think is awful given the large amount of gun violence happening to innocent people'}, {'emotion': 'Contentment', 'intensity': '3', 'reason': 'no emotion detected'}, {'emotion': 'Fear', 'intensity': '3', 'reason': 'Under national control, gun violence still often occurs, which makes…	[{'emotion': 'Anger', 'intensity': '1', 'reason': 'He has his arms opened and the something big looks like its going to be revealed.', 'url': 'anonymous-source/all_shooting_images_newest/116.jpg'}, {'emotion': 'Fear', 'intensity': '4', 'reason': 'it means that there are people out there with murder and gun violence in their mind and not even their therapist suspect anything. there should be more …
204	Flap over funeral doves prompts arrest of California man, seizure of cache of guns and Nazi paraphernalia	anonymous-source/all_shooting_images_newest/110132.jpg	[{'emotion': 'Contentment', 'intensity': '4', 'reason': 'Glad to see Nazis get punished.'}, {'emotion': 'Fear', 'intensity': '4', 'reason': "People like this could be all around us and we just don't know. "}, {'emotion': 'Disgust', 'intensity': '3', 'reason': "it's so hard to believe that people still believe in things like this and actively buy guns and Nazi paraphernalia. It's a disgusting beha…	[{'emotion': 'Disgust', 'intensity': '5', 'reason': "only crazy people with bad intentions would have so many guns I don't understand how this could be a good thing for anybody no one should have so many guns."}, {'emotion': 'Fear', 'intensity': '3', 'reason': 'guns scare me'}, {'emotion': 'Disgust', 'intensity': '3', 'reason': 'I hope not to sell guns.'}, {'emotion': 'Anger', 'intensity': '5', '…	[{'emotion': 'Fear', 'intensity': '4', 'reason': 'So many dangerous weapons and what for?', 'url': 'anonymous-source/all_shooting_images_newest/110132.jpg'}, {'emotion': 'Fear', 'intensity': '5', 'reason': 'there are poeple out there having each multiple guns, why would they need more than one?', 'url': 'anonymous-source/all_shooting_images_newest/110132.jpg'}, {'emotion': 'Fear', 'intensity': '4…
205	Florida students turn to activism in wake of shooting	anonymous-source/all_shooting_images_newest/10535.jpg	[{'emotion': 'Awe', 'intensity': '3', 'reason': 'The mental fortitude it takes for students to fight for change after surviving a shooting is astounding.'}, {'emotion': 'Awe', 'intensity': '5', 'reason': 'These students are brave and inspiring '}, {'emotion': 'Awe', 'intensity': '4', 'reason': "I'm always impressed when people are able to bounce back after a traumatizing event. A school shooting …	[{'emotion': 'Sadness', 'intensity': '3', 'reason': 'gun violence in normal in the US and so many protests have happened but nothing has changed'}, {'emotion': 'Anger', 'intensity': '5', 'reason': 'i remember all the massive shootings happened in US schools'}, {'emotion': 'Excitement', 'intensity': '3', 'reason': 'More and more people are aware of the dangers of gun violence.'}, {'emotion': 'Awe'…	[{'emotion': 'Awe', 'intensity': '2', 'reason': 'glad to see so many people are on the same page as me', 'url': 'anonymous-source/all_shooting_images_newest/10535.jpg'}, {'emotion': 'Contentment', 'intensity': '5', 'reason': 'they are fighting to be heard, but at the same time student should not be fighting for shootings they should be studying and being kids/teenagers not having to worry one day…
206	Las Vegas shooting: Memorial events mark 1-year anniversary as massacre motive still shrouded in mystery	anonymous-source/all_shooting_images_newest/100424.jpg	[{'emotion': 'Sadness', 'intensity': '3', 'reason': 'of the tragic event that transpired and the victims.'}, {'emotion': 'Sadness', 'intensity': '4', 'reason': 'This was a very upsetting episode '}, {'emotion': 'Sadness', 'intensity': '4', 'reason': 'This event was a huge tragedy and I remember hearing about it for the first time. It makes me sad to know that people can actually do terrible thing…	[{'emotion': 'Sadness', 'intensity': '4', 'reason': 'this implies that someone has died and that made me really sad'}, {'emotion': 'Sadness', 'intensity': '5', 'reason': 'it portrays people that just lost a friend or family member'}, {'emotion': 'Sadness', 'intensity': '3', 'reason': 'Because with gun violence, people will inevitably be injured or even killed.'}, {'emotion': 'Sadness', 'intensity…	[{'emotion': 'Contentment', 'intensity': '2', 'reason': "it's good to see people coming together at peace and love", 'url': 'anonymous-source/all_shooting_images_newest/100424.jpg'}, {'emotion': 'Sadness', 'intensity': '5', 'reason': 'innocent people died and they family have no comfort', 'url': 'anonymous-source/all_shooting_images_newest/100424.jpg'}, {'emotion': 'Sadness', 'intensity': '4', 'r…
207	Worried about gun violence, more than 20 Illinois schools install blue emergency boxes that notify police of an active shooter	anonymous-source/all_shooting_images_newest/90355.jpg	[{'emotion': 'Contentment', 'intensity': '3', 'reason': 'I think that is a good way to keep students safe.'}, {'emotion': 'Anger', 'intensity': '3', 'reason': 'They need to change gun laws not install blue lights'}, {'emotion': 'Contentment', 'intensity': '4', 'reason': 'it shows me that people are actively trying to make schools safer in order to prevent further tragedys. With these blue emergen…	[{'emotion': 'Sadness', 'intensity': '5', 'reason': 'I can imagine this is in case an active shooter comes to school and no children should have to be exposed to that concern its not fair'}, {'emotion': 'Amusement', 'intensity': '3', 'reason': 'scholars have some protection in schools'}, {'emotion': 'Fear', 'intensity': '3', 'reason': 'Under national control, gun violence still often occurs, whic…	[{'emotion': 'Fear', 'intensity': '2', 'reason': "it's good to have these. It's just sad to see that we've fallen so far and low to this state of danger.", 'url': 'anonymous-source/all_shooting_images_newest/90355.jpg'}, {'emotion': 'Sadness', 'intensity': '5', 'reason': 'even though it is a good idea, it is sad that it happens so much that it is a need, they are kids.', 'url': 'anonymous-source/…
208	Donald Trump Is a 'Coward' for Leaving D.C. During Gun Protest Says Gregg Popovich	anonymous-source/all_shooting_images_newest/10853.jpg	[{'emotion': 'Amusement', 'intensity': '3', 'reason': 'I agree.'}, {'emotion': 'Contentment', 'intensity': '4', 'reason': 'I agree with this statement '}, {'emotion': 'Sadness', 'intensity': '4', 'reason': 'pretty much anything involving Trump has been very controversial and the media shares so many negative opinions about it.'}, {'emotion': 'Disgust', 'intensity': '3', 'reason': 'Trump is made f…	[{'emotion': 'Disgust', 'intensity': '1', 'reason': 'old men are the ones shaping US policy and they should not be and this image reminded me of that'}, {'emotion': 'Amusement', 'intensity': '5', 'reason': 'Is it Gregg Popovich? '}, {'emotion': 'Fear', 'intensity': '3', 'reason': 'Under national control, gun violence still often occurs, which makes me feel scared.'}, {'emotion': 'Disgust', 'inten…	[{'emotion': 'Amusement', 'intensity': '4', 'reason': "It's fun to see politicians fight", 'url': 'anonymous-source/all_shooting_images_newest/10853.jpg'}, {'emotion': 'Amusement', 'intensity': '5', 'reason': 'i find it funny and not surprising that trump would do that but even more that he got called a coward', 'url': 'anonymous-source/all_shooting_images_newest/10853.jpg'}, {'emotion': 'Anger',…
209	Nikolas Cruz's brother regrets bullying school shooter, report says	anonymous-source/all_shooting_images_newest/10715.jpg	[{'emotion': 'Disgust', 'intensity': '3', 'reason': 'Both parties are in the wrong. Bullying is not okay, and shootings should never occur.'}, {'emotion': 'Fear', 'intensity': '4', 'reason': 'This incident was deeply disturbing '}, {'emotion': 'Disgust', 'intensity': '4', 'reason': "I stand against bullying completely and so I am disgusted with anyone who stoops that low and bullies another kid. …	[{'emotion': 'Disgust', 'intensity': '4', 'reason': 'he is in orange because he probably hurt someone which disgusts me'}, {'emotion': 'Sadness', 'intensity': '5', 'reason': 'people wasting their lives'}, {'emotion': 'Anger', 'intensity': '3', 'reason': 'Because of these situations, I have to be very careful when I go out every day.'}, {'emotion': 'Disgust', 'intensity': '5', 'reason': 'This is a…	[{'emotion': 'Fear', 'intensity': '2', 'reason': "Just makes sense and make you think of how bad reality is. what comes and goes, it' just how the world rolls.", 'url': 'anonymous-source/all_shooting_images_newest/10715.jpg'}, {'emotion': 'Disgust', 'intensity': '5', 'reason': 'bullying is wrong, but being bullied is not an excuse to ill people', 'url': 'anonymous-source/all_shooting_images_newes…
210	Security concerns come to light following shooting outside Mount Sinai Hospital	anonymous-source/all_shooting_images_newest/10023.jpg	[{'emotion': 'Fear', 'intensity': '3', 'reason': 'how much security is going to be enough? We live in a subtle but constant state of fear when out in public'}, {'emotion': 'Contentment', 'intensity': '4', 'reason': 'This is an appropriate reaction '}, {'emotion': 'Fear', 'intensity': '4', 'reason': 'there has been a pattern where changes only happen after a tragedy. I would hope that people start…	[{'emotion': 'Sadness', 'intensity': '3', 'reason': 'the people look really sad and concerned which made me feel sad'}, {'emotion': 'Sadness', 'intensity': '4', 'reason': 'looks like a crime scene'}, {'emotion': 'Fear', 'intensity': '3', 'reason': 'Under national control, gun violence still often occurs, which makes me feel scared.'}, {'emotion': 'Fear', 'intensity': '2', 'reason': 'In the contex…	[{'emotion': 'Sadness', 'intensity': '1', 'reason': "They're scared and lost and no one is safe.", 'url': 'anonymous-source/all_shooting_images_newest/10023.jpg'}, {'emotion': 'Disgust', 'intensity': '5', 'reason': 'they knew something could happen and still did nothing ', 'url': 'anonymous-source/all_shooting_images_newest/10023.jpg'}, {'emotion': 'Fear', 'intensity': '4', 'reason': 'a mass shoo…
211	Doctors rip Santorum for saying students should learn CPR instead of protesting gun violence	anonymous-source/all_shooting_images_newest/10406.jpg	[{'emotion': 'Anger', 'intensity': '3', 'reason': "it's not mutually exclusive. You can learn CPR AND also protest gun violence, but you wouldn't really need CPR if gun violence wasn't a thing."}, {'emotion': 'Contentment', 'intensity': '4', 'reason': 'Santorum deserves to be ripped a new one '}, {'emotion': 'Contentment', 'intensity': '3', 'reason': "I believe protesting is useful and it's part …	[{'emotion': 'Disgust', 'intensity': '1', 'reason': 'he looks like he would support gun ownership and ignore the widespread problem of gun violence'}, {'emotion': 'Contentment', 'intensity': '3', 'reason': 'no emotion detected'}, {'emotion': 'Fear', 'intensity': '3', 'reason': 'Under national control, gun violence still often occurs, which makes me feel scared.'}, {'emotion': 'Fear', 'intensity':…	[{'emotion': 'Amusement', 'intensity': '2', 'reason': 'every has their own argument and his argument is just funny.', 'url': 'anonymous-source/all_shooting_images_newest/10406.jpg'}, {'emotion': 'Anger', 'intensity': '5', 'reason': 'yes CPR is important, but there is a reason why students are protesting, they are kids who should be enjoying their childhood not be worried about dying in school.', …
212	Ivanka Trump tweets about Jacksonville mass shooting, and people are calling her out	anonymous-source/all_shooting_images_newest/453.jpg	[{'emotion': 'Amusement', 'intensity': '3', 'reason': 'anyone in the Trump family should be called out and not given the time of day.'}, {'emotion': 'Contentment', 'intensity': '3', 'reason': 'Ivanka is privileged and tone-deaf '}, {'emotion': 'Contentment', 'intensity': '3', 'reason': "I have no idea what her tweet was so I can't really say that these people were wrong in calling her out."}, {'e…	[{'emotion': 'Disgust', 'intensity': '2', 'reason': 'she has no concern of the wellbeing of others. I find her very narcissistic and heartless'}, {'emotion': 'Contentment', 'intensity': '3', 'reason': 'no emotion detected'}, {'emotion': 'Fear', 'intensity': '3', 'reason': 'Under national control, gun violence still often occurs, which makes me feel scared.'}, {'emotion': 'Fear', 'intensity': '2',…	[{'emotion': 'Amusement', 'intensity': '4', 'reason': "It's just amusing to see celebrities / famous people be put in drama.", 'url': 'anonymous-source/all_shooting_images_newest/453.jpg'}, {'emotion': 'Anger', 'intensity': '5', 'reason': 'she has the means to do something about it, by herself or with her Dad', 'url': 'anonymous-source/all_shooting_images_newest/453.jpg'}, {'emotion': 'Anger', 'i…
213	Harwood Heights police conduct active shooter drill at Eisenhower library: 'You have to have a plan'	anonymous-source/all_shooting_images_newest/127.jpg	[{'emotion': 'Sadness', 'intensity': '3', 'reason': "it's sad that we even have to do these drills. It shows how prevalent shootings are."}, {'emotion': 'Sadness', 'intensity': '4', 'reason': "This shouldn't be reality "}, {'emotion': 'Contentment', 'intensity': '4', 'reason': 'I completely agree and I think that any large public building needs to have a plan in case of an active shooter. We live…	[{'emotion': 'Disgust', 'intensity': '1', 'reason': "I cant tell what is happening here but I feel disgust because I don't really like how heavily the police are funded yet not trained enough on moments of crisis"}, {'emotion': 'Amusement', 'intensity': '4', 'reason': 'looks more like a movie scene than an actual police activity (the guy in the back is kinda laughing)'}, {'emotion': 'Fear', 'inte…	[{'emotion': 'Excitement', 'intensity': '4', 'reason': "Though we shouldn't have to do this, doing this helps to protect people and keep them safe.", 'url': 'anonymous-source/all_shooting_images_newest/127.jpg'}, {'emotion': 'Sadness', 'intensity': '4', 'reason': 'i am content that they are doing plans but it is sad that that is what they need to do.', 'url': 'anonymous-source/all_shooting_images…
214	America s easy access to guns is enabling all these mass shootings	anonymous-source/all_shooting_images_newest/110145.jpg	[{'emotion': 'Fear', 'intensity': '3', 'reason': "I agree, and it makes me fearful that there aren't further gun regulations."}, {'emotion': 'Contentment', 'intensity': '5', 'reason': 'I concur '}, {'emotion': 'Sadness', 'intensity': '3', 'reason': "It's sad but kind of true. I believe that there are places where it can be hard to get guns, but then again there are many ways in which it is very e…	[{'emotion': 'Disgust', 'intensity': '3', 'reason': "guns are a large part of the American persona and I don't think they should be"}, {'emotion': 'Fear', 'intensity': '5', 'reason': 'guns scare me'}, {'emotion': 'Disgust', 'intensity': '3', 'reason': 'I hope not to sell guns.'}, {'emotion': 'Anger', 'intensity': '5', 'reason': 'The imagery of a gun with the American flag in the background makes …	[{'emotion': 'Awe', 'intensity': '4', 'reason': 'no shit, does this even need to be said, just solve the damn problem.', 'url': 'anonymous-source/all_shooting_images_newest/110145.jpg'}, {'emotion': 'Anger', 'intensity': '5', 'reason': 'poiticians not doing anything for gun control or in favor of guns are indirectly killing people', 'url': 'anonymous-source/all_shooting_images_newest/110145.jpg'}…
215	Trump suggests arming teachers at emotional meeting with shooting survivors	anonymous-source/all_shooting_images_newest/10539.jpg	[{'emotion': 'Disgust', 'intensity': '3', 'reason': "that is an awful idea. That's just fighting fire with fire."}, {'emotion': 'Disgust', 'intensity': '5', 'reason': 'This is a terrible idea'}, {'emotion': 'Sadness', 'intensity': '4', 'reason': "It really makes me sad to know that we have gotten to this point of the discussion. I can't imagine seeing my teacher with a gun and it shows me how bad…	[{'emotion': 'Sadness', 'intensity': '5', 'reason': 'it reminds me of all the children that have been lost to gun violence and the fact that policy has not changed'}, {'emotion': 'Anger', 'intensity': '5', 'reason': 'the gov should guarantee safety to kids in schools '}, {'emotion': 'Excitement', 'intensity': '3', 'reason': 'More and more people are aware of the dangers of gun violence.'}, {'emot…	[{'emotion': 'Fear', 'intensity': '4', 'reason': "This is probably the worst thing Trump has recommended and suggested. What's wrong with him man.", 'url': 'anonymous-source/all_shooting_images_newest/10539.jpg'}, {'emotion': 'Fear', 'intensity': '4', 'reason': 'the answers for guns its not more guns.', 'url': 'anonymous-source/all_shooting_images_newest/10539.jpg'}, {'emotion': 'Anger', 'intensi…
216	More gun laws won't curb gun crime	anonymous-source/all_shooting_images_newest/100429.jpg	[{'emotion': 'Anger', 'intensity': '3', 'reason': 'I disagree, and as we continue to debate this without action–more shootings are going to occur.'}, {'emotion': 'Contentment', 'intensity': '3', 'reason': 'I understand that people will just get them illegally but at the same time if less people have them it will still help '}, {'emotion': 'Sadness', 'intensity': '4', 'reason': "I think it is extr…	[{'emotion': 'Sadness', 'intensity': '1', 'reason': 'I assume this is a list of people who have died to gun violence and it is too long'}, {'emotion': 'Sadness', 'intensity': '5', 'reason': 'death make me feel sad '}, {'emotion': 'Sadness', 'intensity': '3', 'reason': 'Gun violence is very easy to cause casualties'}, {'emotion': 'Sadness', 'intensity': '2', 'reason': 'This looks like a memorial, …	[{'emotion': 'Sadness', 'intensity': '4', 'reason': "It's true, and this is a problem that will continue to be addressed, but not necessarily solved. ", 'url': 'anonymous-source/all_shooting_images_newest/100429.jpg'}, {'emotion': 'Anger', 'intensity': '5', 'reason': 'US needs more gun laws so people can stop dying', 'url': 'anonymous-source/all_shooting_images_newest/100429.jpg'}, {'emotion': 'A…
217	School shooting threats, even when no guns are fired, can heighten anxiety among students	anonymous-source/all_shooting_images_newest/100349.jpg	[{'emotion': 'Sadness', 'intensity': '3', 'reason': 'that is just a sad reality that students face in this world.'}, {'emotion': 'Contentment', 'intensity': '5', 'reason': 'Obviously '}, {'emotion': 'Sadness', 'intensity': '4', 'reason': "I think this is completely true. Pretty much anyone in the world would get nervous around a school shooting threat. There have been so many and it has all been …	[{'emotion': 'Sadness', 'intensity': '1', 'reason': 'it looks like they are reacting to a shooter im not sure it just reminds me of bad things that happen in the world'}, {'emotion': 'Contentment', 'intensity': '4', 'reason': 'some safety is provided to school '}, {'emotion': 'Fear', 'intensity': '3', 'reason': 'Under national control, gun violence still often occurs, which makes me feel scared.'…	[{'emotion': 'Anger', 'intensity': '4', 'reason': "Yes, and we as students should be put in these uncomfortable positions. We shouldn't be worrying about guns!", 'url': 'anonymous-source/all_shooting_images_newest/100349.jpg'}, {'emotion': 'Sadness', 'intensity': '5', 'reason': 'children should be in a safe environment for their education.', 'url': 'anonymous-source/all_shooting_images_newest/100…
218	Town Hall for Our Lives' held by students nationwide to focus on gun reform	anonymous-source/all_shooting_images_newest/10863.jpg	[{'emotion': 'Excitement', 'intensity': '3', 'reason': 'I would support that initiative for more gun reform.'}, {'emotion': 'Awe', 'intensity': '5', 'reason': 'This is very inspiring '}, {'emotion': 'Contentment', 'intensity': '3', 'reason': 'again, this makes me happy because it lets me know that there are people out there who really care about fixing this issue and are actively trying to do all…	[{'emotion': 'Sadness', 'intensity': '3', 'reason': 'again it reminds me of school shootings and my fear of them as a child'}, {'emotion': 'Contentment', 'intensity': '3', 'reason': 'no emotion detected'}, {'emotion': 'Excitement', 'intensity': '3', 'reason': 'More and more people are aware of the dangers of gun violence.'}, {'emotion': 'Fear', 'intensity': '2', 'reason': 'This looks like a meeti…	[{'emotion': 'Awe', 'intensity': '2', 'reason': "People are coming together and that's good, this is a good step in creating change for a better and brighter future.", 'url': 'anonymous-source/all_shooting_images_newest/10863.jpg'}, {'emotion': 'Sadness', 'intensity': '4', 'reason': 'adults should be more concerned ', 'url': 'anonymous-source/all_shooting_images_newest/10863.jpg'}, {'emotion': 'A…
219	Son Of Witness: Suspect In Fatal Kroger Shooting Said 'Whites Don't Kill Whites'	anonymous-source/all_shooting_images_newest/100236.jpg	[{'emotion': 'Disgust', 'intensity': '3', 'reason': "It implies whites don't kill whites, they kill other races and ethnicities"}, {'emotion': 'Anger', 'intensity': '4', 'reason': 'thats racist'}, {'emotion': 'Anger', 'intensity': '5', 'reason': 'Deadly racism '}, {'emotion': 'Disgust', 'intensity': '4', 'reason': "it's just not true."}, {'emotion': 'Anger', 'intensity': '2', 'reason': 'The title…	[{'emotion': 'Fear', 'intensity': '4', 'reason': 'Stare people'}, {'emotion': 'Fear', 'intensity': '2', 'reason': 'The man seems very upset and menacing. In the context of gun violence, I am unsure if he wants to hurt more people or not, so I am scared.'}, {'emotion': 'Fear', 'intensity': '1', 'reason': "The almost crazed expression on the man's face makes me feel mild fear"}, {'emotion': 'Fear',…	[{'emotion': 'Disgust', 'intensity': '4', 'reason': 'The content of the news presented in the headline is about gun violence and that\'s a hot talking topic around me which makes me attracted, but the first part of the headline "son of witness" is useless in the headline because no essential content is revealed through this part. That makes me doubt if that report is really focused on gun violenc…
220	A Mall Shooting, a Black Man s Death, and a Debate Over Race and Gun Rights	anonymous-source/all_shooting_images_newest/110088.jpg	[{'emotion': 'Sadness', 'intensity': '4', 'reason': 'Because it describes the loss of a life.'}, {'emotion': 'Sadness', 'intensity': '4', 'reason': 'people dying is sad'}, {'emotion': 'Sadness', 'intensity': '1', 'reason': 'BIG Contrast. The headline contains no affection while the fact is brutal itself. '}, {'emotion': 'Anger', 'intensity': '4', 'reason': "its' frustrating that we have to debate…	[{'emotion': 'Contentment', 'intensity': '3', 'reason': 'army'}, {'emotion': 'Sadness', 'intensity': '3', 'reason': 'I feel sad that gun violence can affect veterans, who have already given up a lot for our country.'}, {'emotion': 'Awe', 'intensity': '1', 'reason': 'I am in mild awe as seeing a man enlist in the military is an act of duty and patriotism'}, {'emotion': 'Awe', 'intensity': '3', 're…	[{'emotion': 'Contentment', 'intensity': '3', 'reason': 'The headline is very clear and rich.', 'url': 'anonymous-source/all_shooting_images_newest/110088.jpg'}, {'emotion': 'Sadness', 'intensity': '3', 'reason': 'black people are being killed for racial biases ', 'url': 'anonymous-source/all_shooting_images_newest/110088.jpg'}, {'emotion': 'Sadness', 'intensity': '3', 'reason': 'As a minority, I…
221	The Latest: Trump postpones Penn. rally after shooting	anonymous-source/all_shooting_images_newest/10654.jpg	[{'emotion': 'Fear', 'intensity': '3', 'reason': 'The shooting is sad, but Trump moving his rally does not matter at all to me.'}, {'emotion': 'Anger', 'intensity': '4', 'reason': "I really just don't like trump"}, {'emotion': 'Contentment', 'intensity': '3', 'reason': "that's necessary "}, {'emotion': 'Contentment', 'intensity': '2', 'reason': "it should be this way, but the fact that it's surpr…	[{'emotion': 'Awe', 'intensity': '3', 'reason': 'positive energy'}, {'emotion': 'Sadness', 'intensity': '1', 'reason': 'the president was addressing a national tragedy that occurred. The fact that the shooting was so bad that the president had to address it makes me sad. '}, {'emotion': 'Disgust', 'intensity': '3', 'reason': 'As a Florida resident, the last thing I wanted after the Parkland shoot…	[{'emotion': 'Sadness', 'intensity': '3', 'reason': 'The title focuses on two elements: trump and Fla. trip. And the subtitle gives one more element: school shooting. The president is going on vacation after a severe event which shows the president carelessness about the event.', 'url': 'anonymous-source/all_shooting_images_newest/10654.jpg'}, {'emotion': 'Disgust', 'intensity': '3', 'reason': "T…
222	NRA backs Manchin challenger Morrisey in W.Va. Senate race	anonymous-source/all_shooting_images_newest/90483.jpg	[{'emotion': 'Anger', 'intensity': '4', 'reason': 'Because the NRA is a terrible organization, and it makes me angry that someone like Morrisey is running for Senate.'}, {'emotion': 'Anger', 'intensity': '4', 'reason': 'I hate the nra'}, {'emotion': 'Fear', 'intensity': '1', 'reason': 'High context. I have to google who is Morrisey and what has he/she done. '}, {'emotion': 'Sadness', 'intensity':…	[{'emotion': 'Sadness', 'intensity': '3', 'reason': 'sad face'}, {'emotion': 'Sadness', 'intensity': '1', 'reason': 'a member of congress seems upset by gun violence in America.'}, {'emotion': 'Contentment', 'intensity': '1', 'reason': 'I do not recognize the man in the photo so I feel a mild sense of contentment as the image does not cause me much emotion at all'}, {'emotion': 'Anger', 'intensit…	[{'emotion': 'Awe', 'intensity': '5', 'reason': 'People with power fighting each other is always attractive to readers. ', 'url': 'anonymous-source/all_shooting_images_newest/90483.jpg'}, {'emotion': 'Anger', 'intensity': '3', 'reason': "I don't agree with Morrisey's policies", 'url': 'anonymous-source/all_shooting_images_newest/90483.jpg'}, {'emotion': 'Disgust', 'intensity': '3', 'reason': "I d…
223	Blocked From Posting Printable Gun Plans, Activist Will Mail Them Instead	anonymous-source/all_shooting_images_newest/9.jpg	[{'emotion': 'Sadness', 'intensity': '3', 'reason': 'It made me sad that activists are forced to revert to this type of plan.'}, {'emotion': 'Anger', 'intensity': '4', 'reason': 'i dont want people to be able to print guns'}, {'emotion': 'Fear', 'intensity': '2', 'reason': "well you can't stop them. "}, {'emotion': 'Anger', 'intensity': '4', 'reason': "it's frustrating that people are so desperat…	[{'emotion': 'Fear', 'intensity': '3', 'reason': 'A trebuchet'}, {'emotion': 'Fear', 'intensity': '1', 'reason': 'almost anyone is able to print a gun that might not be detectable.'}, {'emotion': 'Anger', 'intensity': '4', 'reason': 'I am pretty angry that guns are so accessible in the US and are even being 3d printed. '}, {'emotion': 'Anger', 'intensity': '4', 'reason': 'that people are printing…	[{'emotion': 'Contentment', 'intensity': '3', 'reason': 'two elements are here: printable gun, activist. Printable gun means technology and activist stands for the people who are making changes. Technology makes gun more reachable and people are making such tech more real.', 'url': 'anonymous-source/all_shooting_images_newest/9.jpg'}, {'emotion': 'Fear', 'intensity': '5', 'reason': 'printable gun…
224	Federal judge overturns California s 95-year-old ban on handgun advertising	anonymous-source/all_shooting_images_newest/90118.jpg	[{'emotion': 'Disgust', 'intensity': '4', 'reason': "Handguns and other weapons shouldn't be advertised to the public like other products"}, {'emotion': 'Anger', 'intensity': '4', 'reason': 'I dont want guns advertised'}, {'emotion': 'Disgust', 'intensity': '2', 'reason': 'Why? how can you move backward '}, {'emotion': 'Anger', 'intensity': '4', 'reason': "I'm not sure why the judge would overtur…	[{'emotion': 'Amusement', 'intensity': '2', 'reason': 'no point'}, {'emotion': 'Fear', 'intensity': '1', 'reason': 'that woman does not seem to know how to handle a gun correctly'}, {'emotion': 'Fear', 'intensity': '5', 'reason': 'Gun shows inflict a great sense of fear as I do not want more guns in the hands of the public as I fear for my life and the life of loved ones'}, {'emotion': 'Disgust',…	[{'emotion': 'Fear', 'intensity': '4', 'reason': 'A women holding a handgun in the crew means dangerous which brings me fear. But in the headline, it shows the government is controlling such behavior.', 'url': 'anonymous-source/all_shooting_images_newest/90118.jpg'}, {'emotion': 'Fear', 'intensity': '3', 'reason': 'gun violence is being commercially advertised ', 'url': 'anonymous-source/all_shoo…
225	Gun violence, health care among top concerns for women, especially minorities, new survey finds	anonymous-source/all_shooting_images_newest/100311.jpg	[{'emotion': 'Sadness', 'intensity': '4', 'reason': 'That minorities and women are facing serious gun violence issues.'}, {'emotion': 'Sadness', 'intensity': '4', 'reason': 'its sad that people have to worry about gun violence'}, {'emotion': 'Contentment', 'intensity': '3', 'reason': 'That fits the common sense. We need more surveys like that. '}, {'emotion': 'Excitement', 'intensity': '4', 'reas…	[{'emotion': 'Excitement', 'intensity': '4', 'reason': 'It makes me feel safe that everyone all gather together'}, {'emotion': 'Contentment', 'intensity': '1', 'reason': 'people are passionate enough about preventing gun violence that they are gathering en masse.'}, {'emotion': 'Awe', 'intensity': '1', 'reason': 'Seeing so many people come together to presumably advocate for change invokes a mild…	[{'emotion': 'Awe', 'intensity': '3', 'reason': '"new survey finds" means some most advanced knowledge.', 'url': 'anonymous-source/all_shooting_images_newest/100311.jpg'}, {'emotion': 'Fear', 'intensity': '5', 'reason': 'this ties into domestic violence', 'url': 'anonymous-source/all_shooting_images_newest/100311.jpg'}, {'emotion': 'Contentment', 'intensity': '3', 'reason': 'I feel like my concer…
226	Let's hope the Salvador Castro Middle School shooting finally wakes up L.A. Unified on school safety	anonymous-source/all_shooting_images_newest/10641.jpg	[{'emotion': 'Anger', 'intensity': '5', 'reason': 'If a shooting is unable to wake up L.A Unified, I am not sure what would'}, {'emotion': 'Sadness', 'intensity': '4', 'reason': "there was a shooting at a middle school that's sad"}, {'emotion': 'Contentment', 'intensity': '3', 'reason': 'Me too. Hope the tragedy can raise public awareness and make progress in gun-control. '}, {'emotion': 'Sadness…	[{'emotion': 'Fear', 'intensity': '3', 'reason': 'casualties'}, {'emotion': 'Fear', 'intensity': '4', 'reason': 'there seems to be a large police and first responder presence, so I wonder how many people have been hurt.'}, {'emotion': 'Sadness', 'intensity': '2', 'reason': 'I feel pretty sad by the photo as I fear that people may have been hurt or may have been killed'}, {'emotion': 'Sadness', 'i…	[{'emotion': 'Sadness', 'intensity': '5', 'reason': 'The pic looks like a disaster. The headline shows LA people generally do not care about school safety.', 'url': 'anonymous-source/all_shooting_images_newest/10641.jpg'}, {'emotion': 'Awe', 'intensity': '4', 'reason': "although this is very sad news I'm hoping it'll be a wake up call for politicians ", 'url': 'anonymous-source/all_shooting_image…
227	The NRA's congressional influence is bad. Its judicial clout could be worse.	anonymous-source/all_shooting_images_newest/90480.jpg	[{'emotion': 'Contentment', 'intensity': '3', 'reason': 'I am happy people are recognizing the NRA as a harmful organization.'}, {'emotion': 'Anger', 'intensity': '4', 'reason': 'i hate the nra'}, {'emotion': 'Contentment', 'intensity': '3', 'reason': 'Though the headline is subjective but I believe they are telling truth. '}, {'emotion': 'Fear', 'intensity': '3', 'reason': 'the NRA is scary in h…	[{'emotion': 'Awe', 'intensity': '3', 'reason': 'someone did something'}, {'emotion': 'Sadness', 'intensity': '1', 'reason': 'not every congressperson is committed to addressing gun violence in America'}, {'emotion': 'Anger', 'intensity': '1', 'reason': 'Presumably the man is a politician, and I am angry at old white male politicians failing to due their duty to protect the US from gun violence'}…	[{'emotion': 'Excitement', 'intensity': '3', 'reason': 'The title is saying the government is doing badly. Such a straight headline means some sharp and rich content.', 'url': 'anonymous-source/all_shooting_images_newest/90480.jpg'}, {'emotion': 'Fear', 'intensity': '5', 'reason': 'the people approving these laws have poor morals in my opinion', 'url': 'anonymous-source/all_shooting_images_newest…
228	Cincinnati Reds to hold Moment of Silence for Fifth Third Center shooting victims	anonymous-source/all_shooting_images_newest/90452.jpg	[{'emotion': 'Contentment', 'intensity': '3', 'reason': 'I am happy they are paying respect to the lost victims of this shooting.'}, {'emotion': 'Sadness', 'intensity': '4', 'reason': 'because people were hurt or killed in a shooting'}, {'emotion': 'Sadness', 'intensity': '3', 'reason': 'A sad scene. '}, {'emotion': 'Sadness', 'intensity': '3', 'reason': "shootings are so often now this isn't eve…	[{'emotion': 'Contentment', 'intensity': '3', 'reason': 'better tmr'}, {'emotion': 'Sadness', 'intensity': '2', 'reason': 'even in sports, which is an escape for many people, we have solemn moments for gun violence victims'}, {'emotion': 'Contentment', 'intensity': '1', 'reason': 'The photo invokes a feeling of patriotism which makes me feel mildly content as I am an American citizen'}, {'emotion…	[{'emotion': 'Sadness', 'intensity': '4', 'reason': 'people are sad about the shooting and "hold Moment of Silence" triggers.', 'url': 'anonymous-source/all_shooting_images_newest/90452.jpg'}, {'emotion': 'Awe', 'intensity': '3', 'reason': 'people who were wrongfully killed are being recognized ', 'url': 'anonymous-source/all_shooting_images_newest/90452.jpg'}, {'emotion': 'Sadness', 'intensity':…
229	Kroger grocery store gunman tried to enter predominantly black church before shooting, police say	anonymous-source/all_shooting_images_newest/100251.jpg	[{'emotion': 'Fear', 'intensity': '5', 'reason': 'I fear for the black community as attacks like this are planned all the time.'}, {'emotion': 'Anger', 'intensity': '4', 'reason': 'I hate racism and gun violence'}, {'emotion': 'Fear', 'intensity': '3', 'reason': 'Church is vulnerable to mass shooting. '}, {'emotion': 'Disgust', 'intensity': '4', 'reason': 'they were targeting black people with gu…	[{'emotion': 'Anger', 'intensity': '3', 'reason': 'prisoner'}, {'emotion': 'Fear', 'intensity': '2', 'reason': 'the man looks like he wants to hurt other people even while in police custody'}, {'emotion': 'Disgust', 'intensity': '3', 'reason': 'The man has clearly been alleged to have committed a crime, which makes me feel a moderate amount of disgust'}, {'emotion': 'Fear', 'intensity': '4', 'rea…	[{'emotion': 'Disgust', 'intensity': '4', 'reason': 'that headline combines gunman and black group together. But the pic is showing a white man.', 'url': 'anonymous-source/all_shooting_images_newest/100251.jpg'}, {'emotion': 'Fear', 'intensity': '3', 'reason': 'black people are being targeted and it is unjust', 'url': 'anonymous-source/all_shooting_images_newest/100251.jpg'}, {'emotion': 'Anger',…
230	After back-to-back mass shootings, America grows numb	anonymous-source/all_shooting_images_newest/110105.jpg	[{'emotion': 'Sadness', 'intensity': '4', 'reason': 'After experiencing so many shootings, it has basically become normal to people.'}, {'emotion': 'Anger', 'intensity': '4', 'reason': 'we shouldnt be desensitized to gun violence but it happens so often that we are'}, {'emotion': 'Sadness', 'intensity': '3', 'reason': "US and people can't take it anymore. "}, {'emotion': 'Fear', 'intensity': '4',…	[{'emotion': 'Sadness', 'intensity': '3', 'reason': 'crying'}, {'emotion': 'Sadness', 'intensity': '4', 'reason': 'the person is clearly affected by the death of a loved one'}, {'emotion': 'Sadness', 'intensity': '3', 'reason': 'I empathize with the girl crying and thus feel a moderate sadness for she is clearly grieving'}, {'emotion': 'Sadness', 'intensity': '4', 'reason': 'this picture is heart…	[{'emotion': 'Sadness', 'intensity': '4', 'reason': "The headline states the population is getting careless about the shooting but the pic is showing the victim's families or friends being sad for the shooting.", 'url': 'anonymous-source/all_shooting_images_newest/110105.jpg'}, {'emotion': 'Fear', 'intensity': '5', 'reason': "people shouldn't become desensitized to these shootings because there n…
231	White House struggles to outline specific efforts made to stop mass shootings	anonymous-source/all_shooting_images_newest/10655.jpg	[{'emotion': 'Anger', 'intensity': '4', 'reason': 'There need to be specific efforts made to stop gun violence.'}, {'emotion': 'Anger', 'intensity': '4', 'reason': 'they should be able to get it together and figure it out because something needs to change'}, {'emotion': 'Contentment', 'intensity': '3', 'reason': 'White House should be responsible '}, {'emotion': 'Anger', 'intensity': '4', 'reason…	[{'emotion': 'Sadness', 'intensity': '3', 'reason': 'An expression of pain'}, {'emotion': 'Sadness', 'intensity': '1', 'reason': 'the press secretary seems to be tired of answering questions about gun violence, showing how prevalent it is in our society'}, {'emotion': 'Amusement', 'intensity': '5', 'reason': 'This woman has such a pitiful expression on her face that it makes me laugh. I recognize…	[{'emotion': 'Excitement', 'intensity': '2', 'reason': 'The title shows the government is trying to solve the problems but they did not succeed, yet.', 'url': 'anonymous-source/all_shooting_images_newest/10655.jpg'}, {'emotion': 'Fear', 'intensity': '5', 'reason': 'the government, the people leading this country, are not taking tangible actions to stop this ', 'url': 'anonymous-source/all_shootin…
232	Brett Kavanaugh Trolled After Claiming He Grew Up in 'City Plagued by Gun Violence'	anonymous-source/all_shooting_images_newest/90493.jpg	[{'emotion': 'Amusement', 'intensity': '4', 'reason': 'Kavanaugh is an idiot.'}, {'emotion': 'Amusement', 'intensity': '4', 'reason': 'brett kavanaugh is annoying and deserves much worse than to be made fun of'}, {'emotion': 'Disgust', 'intensity': '3', 'reason': "don't blame the background "}, {'emotion': 'Anger', 'intensity': '4', 'reason': "why is he trying to make himself seem like somebody h…	[{'emotion': 'Contentment', 'intensity': '3', 'reason': 'justice'}, {'emotion': 'Sadness', 'intensity': '1', 'reason': 'the supreme court members are skewed towards a conservative majority and might block common sense gun laws'}, {'emotion': 'Anger', 'intensity': '1', 'reason': 'The man reminds me of a politician, thus making me angry as I do not believe politicians have protected the well being …	[{'emotion': 'Sadness', 'intensity': '4', 'reason': 'Feel bad about his childhood.', 'url': 'anonymous-source/all_shooting_images_newest/90493.jpg'}, {'emotion': 'Amusement', 'intensity': '4', 'reason': 'this politician is an embarassment to our country', 'url': 'anonymous-source/all_shooting_images_newest/90493.jpg'}, {'emotion': 'Sadness', 'intensity': '3', 'reason': 'I feel sorry for his exper…
233	A judge ruled that a website has to suspend downloads for 3D gun plans. But they're already out there	anonymous-source/all_shooting_images_newest/13.jpg	[{'emotion': 'Fear', 'intensity': '4', 'reason': 'People now have the 3D gun plans.'}, {'emotion': 'Anger', 'intensity': '4', 'reason': 'because people are able to print guns'}, {'emotion': 'Excitement', 'intensity': '2', 'reason': 'At least the judge is doing sth. Maybe he/she can help delete them. '}, {'emotion': 'Fear', 'intensity': '4', 'reason': 'the fact that the plans are online because it…	[{'emotion': 'Fear', 'intensity': '2', 'reason': 'A trebuchet'}, {'emotion': 'Fear', 'intensity': '1', 'reason': 'a concealable handgun can be 3d printed by anyone'}, {'emotion': 'Disgust', 'intensity': '4', 'reason': 'I heavily dislike guns and the violence they cause so I felt a great amount of disgust looking at the image'}, {'emotion': 'Anger', 'intensity': '4', 'reason': 'that people are pri…	[{'emotion': 'Fear', 'intensity': '4', 'reason': 'Technology makes gun more reachable and people are making such tech more real. But the good side of this title is that the judge is seeing this.', 'url': 'anonymous-source/all_shooting_images_newest/13.jpg'}, {'emotion': 'Fear', 'intensity': '3', 'reason': "suspending these downloads aren't going to do much becuase the blueprints are already sprea…
234	Last Lockdown' statues part of gun-control group's plan to change minds in pro-gun districts	anonymous-source/all_shooting_images_newest/90135.jpg	[{'emotion': 'Excitement', 'intensity': '4', 'reason': "There needs to be more of a push to change people's mind on gun control."}, {'emotion': 'Contentment', 'intensity': '4', 'reason': 'im not quite sure what this one is saying'}, {'emotion': 'Excitement', 'intensity': '1', 'reason': 'new plans may be workable. '}, {'emotion': 'Excitement', 'intensity': '3', 'reason': 'hopefully they can have a…	[{'emotion': 'Fear', 'intensity': '3', 'reason': 'A trebuchet'}, {'emotion': 'Sadness', 'intensity': '1', 'reason': 'a lot of minors seem to be able to get their hands on these style rifles'}, {'emotion': 'Fear', 'intensity': '4', 'reason': 'Seeing so many semi-automatic rifles lined up inflicts a great deal of fear as I fear the violence they can cause to someone'}, {'emotion': 'Anger', 'intensi…	[{'emotion': 'Fear', 'intensity': '2', 'reason': 'That title and the pic together deliver a message: there will be more gunfights generated.', 'url': 'anonymous-source/all_shooting_images_newest/90135.jpg'}, {'emotion': 'Fear', 'intensity': '5', 'reason': 'pro-gun districts are preventing changes in gun control laws', 'url': 'anonymous-source/all_shooting_images_newest/90135.jpg'}, {'emotion': 'F…
235	Gays Against Guns claims victory as FedEx ends NRA discount	anonymous-source/all_shooting_images_newest/100338.jpg	[{'emotion': 'Contentment', 'intensity': '4', 'reason': 'FedEx no longer associates with a org. like the NRA'}, {'emotion': 'Excitement', 'intensity': '4', 'reason': 'because i hate the nra '}, {'emotion': 'Amusement', 'intensity': '2', 'reason': 'wanna know more about the battle '}, {'emotion': 'Excitement', 'intensity': '3', 'reason': "companies should be making statements like ending partnersh…	[{'emotion': 'Excitement', 'intensity': '3', 'reason': 'protest'}, {'emotion': 'Excitement', 'intensity': '2', 'reason': 'a community has come together to protest something they feel strongly about, and it shows that gun violence affects many communities in America. '}, {'emotion': 'Excitement', 'intensity': '4', 'reason': 'Seeing so many people of the LGBTQ+ community together walking for change…	[{'emotion': 'Awe', 'intensity': '3', 'reason': "There is someone fighting against society to stop guns. That's good. That someone is gay, a minority which is in lack of rights about anything.", 'url': 'anonymous-source/all_shooting_images_newest/100338.jpg'}, {'emotion': 'Awe', 'intensity': '5', 'reason': 'different social cause groups are supporting gun control', 'url': 'anonymous-source/all_sh…
236	Waffle House shooting illustrates the danger posed by gun-free zones	anonymous-source/all_shooting_images_newest/10708.jpg	[{'emotion': 'Anger', 'intensity': '4', 'reason': 'Headlines like this usually come from a anti-gun control writer and are biased.'}, {'emotion': 'Anger', 'intensity': '4', 'reason': 'shootings make me angry'}, {'emotion': 'Excitement', 'intensity': '2', 'reason': 'can wait to see the op-ed '}, {'emotion': 'Fear', 'intensity': '4', 'reason': 'why is there a shooting in a gun-free zone.'}, {'emoti…	[{'emotion': 'Fear', 'intensity': '3', 'reason': 'police car'}, {'emotion': 'Fear', 'intensity': '1', 'reason': 'a shooting could occur anywhere, even at a restaurant where you bring your kids'}, {'emotion': 'Sadness', 'intensity': '2', 'reason': 'I am saddened that a crime has been committed and hope no one is hurt, I am also saddened that such situations seem to happen so often.'}, {'emotion': …	[{'emotion': 'Fear', 'intensity': '4', 'reason': 'It connects the shooting with danger and then connects these to gun-free zones. Gun-free zones = danger.', 'url': 'anonymous-source/all_shooting_images_newest/10708.jpg'}, {'emotion': 'Fear', 'intensity': '5', 'reason': 'people who are just going about their lives eating waffles can potentially be killed for no reason', 'url': 'anonymous-source/al…
237	NRA spokeswoman to Warren: Most Americans have native heritage	anonymous-source/all_shooting_images_newest/100153.jpg	[{'emotion': 'Disgust', 'intensity': '5', 'reason': "Most American's are not natives to this land. It was taken from real Natives."}, {'emotion': 'Anger', 'intensity': '4', 'reason': 'i hate the nra'}, {'emotion': 'Amusement', 'intensity': '1', 'reason': "Can't believe that. Is there a DNA investigation? "}, {'emotion': 'Anger', 'intensity': '3', 'reason': "it's just so unnecessary and I'm not su…	[{'emotion': 'Contentment', 'intensity': '3', 'reason': 'speech'}, {'emotion': 'Sadness', 'intensity': '2', 'reason': 'people who attend CPAC often oppose common sense gun laws'}, {'emotion': 'Disgust', 'intensity': '1', 'reason': "Between the woman's body position that seems arrogant, she is also a representative of the American conservative union which invokes a mild feeling of disgust."}, {'em…	[{'emotion': 'Awe', 'intensity': '3', 'reason': 'That title states something I felt in the same way.', 'url': 'anonymous-source/all_shooting_images_newest/100153.jpg'}, {'emotion': 'Amusement', 'intensity': '3', 'reason': 'this is simply not true', 'url': 'anonymous-source/all_shooting_images_newest/100153.jpg'}, {'emotion': 'Anger', 'intensity': '3', 'reason': 'Holding a gun or violence is not a…
238	Disturbing as hell': NRA slammed for giving 'Thomas & Friends' characters a KKK makeover	anonymous-source/all_shooting_images_newest/90470.jpg	[{'emotion': 'Disgust', 'intensity': '5', 'reason': "The NRA is defacing a literal children's cartoon."}, {'emotion': 'Disgust', 'intensity': '5', 'reason': 'I hate racism, the kkk, and the nra'}, {'emotion': 'Amusement', 'intensity': '3', 'reason': 'what a clown '}, {'emotion': 'Disgust', 'intensity': '4', 'reason': 'how is this even a thing that is happening in these times.'}, {'emotion': 'Amus…	[{'emotion': 'Amusement', 'intensity': '1', 'reason': 'whimsy'}, {'emotion': 'Disgust', 'intensity': '4', 'reason': 'a childrens show is being used in a violent manner to serve as propaganda '}, {'emotion': 'Disgust', 'intensity': '5', 'reason': 'I am absolutely disgusted by the fact that Thomas the Tank Engine and Friends have been altered to wear KKK hoods, as my favorite childhood show was tur…	[{'emotion': 'Sadness', 'intensity': '3', 'reason': 'KKK is a shame of USA history and those people are making fun of it. People should not use it for any purpose but NRA is using it.', 'url': 'anonymous-source/all_shooting_images_newest/90470.jpg'}, {'emotion': 'Sadness', 'intensity': '5', 'reason': 'what the KKK stands for is not a joke and should not be made into entertainment', 'url': 'anonym…
239	3-D Printed Gun Blueprints Are Back, and Only New Laws Can Stop Them	anonymous-source/all_shooting_images_newest/299.jpg	[{'emotion': 'Fear', 'intensity': '3', 'reason': '3D printed guns could be on the rise.'}, {'emotion': 'Anger', 'intensity': '4', 'reason': 'i want these to stop '}, {'emotion': 'Fear', 'intensity': '2', 'reason': 'Only new laws can stop them make them threatening to the public health now'}, {'emotion': 'Fear', 'intensity': '5', 'reason': "Everyone around me probably had a gun, but I didn't, so t…	[{'emotion': 'Fear', 'intensity': '4', 'reason': 'anything in the context of gun violence scares me '}, {'emotion': 'Fear', 'intensity': '1', 'reason': 'his face makes me feel uncomfortable because there seems to be no emotion in it, and in the context of gun violence it makes it unsettling '}, {'emotion': 'Contentment', 'intensity': '2', 'reason': 'his look is funny'}, {'emotion': 'Sadness', 'in…	[{'emotion': 'Fear', 'intensity': '5', 'reason': 'i am worried because anyone can have access to that information anywhere in the world. once the information is out there is no erasing it. this is dangerous as it concerns people building rather than buying. it is more difficult to control random objects used to build guns than actual guns ', 'url': 'anonymous-source/all_shooting_images_newest/299…
240	Left brings campaign against gun-makers to Wall Street	anonymous-source/all_shooting_images_newest/10096.jpg	[{'emotion': 'Excitement', 'intensity': '4', 'reason': 'I agree with this campaign.'}, {'emotion': 'Contentment', 'intensity': '4', 'reason': 'some progress on the ban '}, {'emotion': 'Sadness', 'intensity': '2', 'reason': 'The protests may disrupt Wall Street '}, {'emotion': 'Excitement', 'intensity': '5', 'reason': 'School shootings have been a big problem. The careful young man found the probl…	[{'emotion': 'Contentment', 'intensity': '3', 'reason': 'because I think she supports stricter gun laws'}, {'emotion': 'Contentment', 'intensity': '1', 'reason': "she doesn't really represent anything bad when it comes to gun violence so there isn't any negative emotion associated with her."}, {'emotion': 'Anger', 'intensity': '1', 'reason': 'her expression seems angry which makes me kind of angr…	[{'emotion': 'Contentment', 'intensity': '1', 'reason': 'campaigns usually don’t work as there are people that will tirelessly defend their 2nd amendment “right”. I am content because it is better than not addressing the issue at all.', 'url': 'anonymous-source/all_shooting_images_newest/10096.jpg'}, {'emotion': 'Awe', 'intensity': '3', 'reason': 'It is bringing about gun control', 'url': 'anonym…
241	Cuomo faults D.C. Democrats for not pushing tough gun bill	anonymous-source/all_shooting_images_newest/10898.jpg	[{'emotion': 'Disgust', 'intensity': '1', 'reason': 'He is always looking for someone to blame.'}, {'emotion': 'Contentment', 'intensity': '4', 'reason': "I agree with Cuomo's statement "}, {'emotion': 'Contentment', 'intensity': '2', 'reason': 'A politician is supporting stricter gun bills'}, {'emotion': 'Disgust', 'intensity': '5', 'reason': "I think guns need to be strictly controlled so that …	[{'emotion': 'Amusement', 'intensity': '4', 'reason': 'because he is in the midst of a sex scandal currently '}, {'emotion': 'Disgust', 'intensity': '1', 'reason': 'his recent actions discredit any good that he has done so seeing him evokes disgust. '}, {'emotion': 'Anger', 'intensity': '1', 'reason': 'he seems angry at something so it makes me angry'}, {'emotion': 'Disgust', 'intensity': '3', 'r…	[{'emotion': 'Sadness', 'intensity': '4', 'reason': 'we are supposed to have a united front regarding gun violence and not pin the issue on anyone. not on the left nor the right. this is a human issue that concerns anyone thats alive, and who’s life is in danger in the presence of a gun. Cuomo should be just as disappointed in the right', 'url': 'anonymous-source/all_shooting_images_newest/10898.…
242	Trump falsely says NYSE opened day after Sept. 11 attacks to justify holding rally after Pittsburgh shooting	anonymous-source/all_shooting_images_newest/100450.jpg	[{'emotion': 'Awe', 'intensity': '5', 'reason': 'In awe at how stupid he is.'}, {'emotion': 'Anger', 'intensity': '3', 'reason': "can't agree with Trump"}, {'emotion': 'Amusement', 'intensity': '4', 'reason': 'Trump said something wrong again'}, {'emotion': 'Disgust', 'intensity': '5', 'reason': 'Many politicians do not consider the safety of public life for their interests.'}, {'emotion': 'Disgu…	[{'emotion': 'Anger', 'intensity': '5', 'reason': 'hes a jackass '}, {'emotion': 'Anger', 'intensity': '4', 'reason': "he has done practically nothing to help the citizens that have voted him in. He has also incited violence and rioting and put people in danger which is angering. I just think that he's a bad person and has promoted bad behavior which doesn't sit right with me. "}, {'emotion': 'Di…	[{'emotion': 'Disgust', 'intensity': '4', 'reason': 'there is never good reason to hold a political rally after a tragic event like a shooting. just because some other organization did a misstep, it does not make it okay to do the same.', 'url': 'anonymous-source/all_shooting_images_newest/100450.jpg'}, {'emotion': 'Anger', 'intensity': '4', 'reason': 'I strongly dislike Donald Trump', 'url': 'an…
243	How gun background checks work	anonymous-source/all_shooting_images_newest/10138.jpg	[{'emotion': 'Contentment', 'intensity': '5', 'reason': 'I agree.'}, {'emotion': 'Contentment', 'intensity': '4', 'reason': 'more progress related to ban '}, {'emotion': 'Contentment', 'intensity': '2', 'reason': 'It covers some knowledge about guns'}, {'emotion': 'Fear', 'intensity': '4', 'reason': 'That even government officials are worried proves that the problem is indeed serious.'}, {'emotio…	[{'emotion': 'Fear', 'intensity': '5', 'reason': 'that is a weapon that could execute a mass shooting '}, {'emotion': 'Anger', 'intensity': '2', 'reason': "this reminds me of a news feature that another shooting has happened or someone has gotten their hands on another assault rifle that they don't need. I think it's more annoyance than anger because the solution could be so easy, but people are …	[{'emotion': 'Contentment', 'intensity': '3', 'reason': 'information about gun is important, to further understand the issue and come up with the best solution.', 'url': 'anonymous-source/all_shooting_images_newest/10138.jpg'}, {'emotion': 'Fear', 'intensity': '3', 'reason': 'I feel that background checks for guns are not thorough enough', 'url': 'anonymous-source/all_shooting_images_newest/10138…
244	More than 1,000 Chicago-area students get detention for walking out of school to protest gun violence	anonymous-source/all_shooting_images_newest/10079.jpg	[{'emotion': 'Sadness', 'intensity': '5', 'reason': 'It was for a good cause.'}, {'emotion': 'Anger', 'intensity': '4', 'reason': 'I think they are doing the right thing '}, {'emotion': 'Sadness', 'intensity': '2', 'reason': 'The students should not be punished for protests'}, {'emotion': 'Contentment', 'intensity': '5', 'reason': 'It is not appropriate for high school students to own their guns,…	[{'emotion': 'Awe', 'intensity': '4', 'reason': 'that there a youth protesting gun violence '}, {'emotion': 'Sadness', 'intensity': '2', 'reason': "more children have probably died at the hands of gun violence which is sad because they're defenseless, "}, {'emotion': 'Sadness', 'intensity': '5', 'reason': 'seeing people fight for something not taken seriously is sad'}, {'emotion': 'Sadness', 'int…	[{'emotion': 'Awe', 'intensity': '5', 'reason': 'the youth should always be present in politics, as they are the future.', 'url': 'anonymous-source/all_shooting_images_newest/10079.jpg'}, {'emotion': 'Awe', 'intensity': '3', 'reason': 'Seeing students take a stand makes me proud', 'url': 'anonymous-source/all_shooting_images_newest/10079.jpg'}, {'emotion': 'Awe', 'intensity': '4', 'reason': "I'm …
245	Teachers who survived shootings at Columbine, Sandy Hook, and Rancho Tehama discuss going back into the classroom.	anonymous-source/all_shooting_images_newest/90037.jpg	[{'emotion': 'Excitement', 'intensity': '5', 'reason': 'I am happy to see them getting back into work.'}, {'emotion': 'Sadness', 'intensity': '4', 'reason': 'feel sad about what they went through '}, {'emotion': 'Awe', 'intensity': '4', 'reason': 'It must be traumatizing to survive shootings'}, {'emotion': 'Contentment', 'intensity': '4', 'reason': 'He has no sympathy for the victims, so quitting…	[{'emotion': 'Sadness', 'intensity': '5', 'reason': 'because they may have lost their lives in the shooting '}, {'emotion': 'Sadness', 'intensity': '4', 'reason': "this brought tears to my eyes seeing the sandy hook elementary part. It's sad that people died, and I was in school when it happened and I remember the changes and the tension that surrounded the events. Plus the fact that it was an el…	[{'emotion': 'Sadness', 'intensity': '5', 'reason': 'i am disappointed in the system and saddened at the trauma this education is facing.', 'url': 'anonymous-source/all_shooting_images_newest/90037.jpg'}, {'emotion': 'Awe', 'intensity': '3', 'reason': 'Seeing these people overcome their fears is inspiring ', 'url': 'anonymous-source/all_shooting_images_newest/90037.jpg'}, {'emotion': 'Sadness', '…
246	I chose to show him empathy': Jewish nurse who treated synagogue shooting suspect	anonymous-source/all_shooting_images_newest/110375.jpg	[{'emotion': 'Disgust', 'intensity': '5', 'reason': "I don't have THAT level of empathy or forgiveness."}, {'emotion': 'Sadness', 'intensity': '3', 'reason': 'feel sad about the case '}, {'emotion': 'Awe', 'intensity': '2', 'reason': 'The nurse is being empathetic '}, {'emotion': 'Contentment', 'intensity': '4', 'reason': 'Lax control of guns is a fatal danger to society.'}, {'emotion': 'Awe', 'i…	[{'emotion': 'Fear', 'intensity': '5', 'reason': 'because that is scary to imagine '}, {'emotion': 'Fear', 'intensity': '1', 'reason': "i'm not 100% sure what is going on in the photo but it must be big given the heavy police presence and what I think is a stretcher. This makes me feel like another big shooting went on but i don't know where it is so it's concerning and scary that it happened aga…	[{'emotion': 'Fear', 'intensity': '3', 'reason': 'no one should excuse such behavior.', 'url': 'anonymous-source/all_shooting_images_newest/110375.jpg'}, {'emotion': 'Awe', 'intensity': '3', 'reason': 'It is inspiring to see the nurse put her duties as a nurse above her personal feelings', 'url': 'anonymous-source/all_shooting_images_newest/110375.jpg'}, {'emotion': 'Contentment', 'intensity': '4…
247	Full Panel: Students' gun march will test strength of movement	anonymous-source/all_shooting_images_newest/10322.jpg	[{'emotion': 'Excitement', 'intensity': '3', 'reason': 'I want to see how far this movement can go.'}, {'emotion': 'Contentment', 'intensity': '4', 'reason': 'I support them'}, {'emotion': 'Excitement', 'intensity': '2', 'reason': 'I want to see how is the result'}, {'emotion': 'Fear', 'intensity': '4', 'reason': 'It is a horror that elementary school children can have handguns and carry them to …	[{'emotion': 'Anger', 'intensity': '4', 'reason': 'they are probably getting nothing done '}, {'emotion': 'Contentment', 'intensity': '1', 'reason': "I'm not sure what's going on here but there is nothing that sets off alarm bells in the photo. in the context of gun violence, I'm going to assume that they're talking about a recent bill because nothing is alarming me on their faces. "}, {'emotion'…	[{'emotion': 'Excitement', 'intensity': '5', 'reason': 'it feels good to learn that the youth are getting involved because they are the ones being directly impacted.', 'url': 'anonymous-source/all_shooting_images_newest/10322.jpg'}, {'emotion': 'Awe', 'intensity': '2', 'reason': "It doesn't tell me much", 'url': 'anonymous-source/all_shooting_images_newest/10322.jpg'}, {'emotion': 'Awe', 'intensi…
248	Trevor Noah: The Second Amendment was not made for black folks	anonymous-source/all_shooting_images_newest/110133.jpg	[{'emotion': 'Contentment', 'intensity': '4', 'reason': 'I agree with him.'}, {'emotion': 'Anger', 'intensity': '4', 'reason': "it's racism"}, {'emotion': 'Anger', 'intensity': '2', 'reason': 'Some races are not protected by the second amendment '}, {'emotion': 'Sadness', 'intensity': '4', 'reason': 'I feel very sad and uncomfortable'}, {'emotion': 'Disgust', 'intensity': '4', 'reason': 'people o…	[{'emotion': 'Awe', 'intensity': '4', 'reason': 'I respect Trevor Noahs takes on politics gun violence and different issues as well as like his comedy'}, {'emotion': 'Contentment', 'intensity': '1', 'reason': "I really like Trevor Noah so I'm probably going to resonate with whatever he is saying. In terms of gun violence, he always knows how to respond in moments like these so I have no need for …	[{'emotion': 'Anger', 'intensity': '4', 'reason': 'this is a loaded sentences that addresses the centuries of systematic racial oppression that people face in the united states.', 'url': 'anonymous-source/all_shooting_images_newest/110133.jpg'}, {'emotion': 'Sadness', 'intensity': '3', 'reason': 'The double standard between white and black people is sad', 'url': 'anonymous-source/all_shooting_ima…
249	Guns allowed on campus leads prof to cancel office hours, declare I no longer feel safe : student	anonymous-source/all_shooting_images_newest/335.jpg	[{'emotion': 'Sadness', 'intensity': '5', 'reason': "Professors shouldn't have to live in fear."}, {'emotion': 'Contentment', 'intensity': '4', 'reason': 'I agree with the title '}, {'emotion': 'Sadness', 'intensity': '2', 'reason': 'College should be a safe place for academic progress, but now it is disrupted by guns.'}, {'emotion': 'Fear', 'intensity': '4', 'reason': 'A confrontation with a sus…	[{'emotion': 'Fear', 'intensity': '4', 'reason': 'why he is carrying a gun at what looks like a dinner'}, {'emotion': 'Fear', 'intensity': '4', 'reason': "there doesn't seem to be a need for the gun and there are children. I don't understand why he's reaching for it but based on the news, it makes me feel like someone is going to die. "}, {'emotion': 'Fear', 'intensity': '4', 'reason': 'seems as …	[{'emotion': 'Anger', 'intensity': '4', 'reason': 'i am shocked and angered that this is what it has come to. our educators are one of the pillars of our society and they are being forced out of their jobs.', 'url': 'anonymous-source/all_shooting_images_newest/335.jpg'}, {'emotion': 'Fear', 'intensity': '3', 'reason': 'Nobody should fear for their life when going to work', 'url': 'anonymous-sourc…
250	Rep. Steve Scalise Shooting News & Videos	anonymous-source/all_shooting_images_newest/10102.jpg	[{'emotion': 'Excitement', 'intensity': '1', 'reason': 'Not much to take from this.'}, {'emotion': 'Anger', 'intensity': '4', 'reason': 'surprised about his behaviors '}, {'emotion': 'Amusement', 'intensity': '2', 'reason': 'I don’t quite understand this title.'}, {'emotion': 'Sadness', 'intensity': '4', 'reason': 'I feel sorry for the victims.'}, {'emotion': 'Sadness', 'intensity': '4', 'reason'…	[{'emotion': 'Anger', 'intensity': '4', 'reason': 'bunch of old white men deciding stuff'}, {'emotion': 'Disgust', 'intensity': '1', 'reason': "i'm not sure why people are clapping but his face doesn't seem right in the context of gun violence and there is something about him that i don't trust. "}, {'emotion': 'Amusement', 'intensity': '2', 'reason': 'the people seem happy and unconcerned'}, {'e…	[{'emotion': 'Contentment', 'intensity': '1', 'reason': 'i do not fully understand the intent of the headline', 'url': 'anonymous-source/all_shooting_images_newest/10102.jpg'}, {'emotion': 'Fear', 'intensity': '3', 'reason': 'There is no context', 'url': 'anonymous-source/all_shooting_images_newest/10102.jpg'}, {'emotion': 'Sadness', 'intensity': '2', 'reason': 'he went through a gun shooting whi…
251	Mental health crisis isn't about guns. It's about Trump & GOP gutting Medicaid: Kennedy	anonymous-source/all_shooting_images_newest/10900.jpg	[{'emotion': 'Contentment', 'intensity': '5', 'reason': 'I agree.'}, {'emotion': 'Anger', 'intensity': '3', 'reason': 'I think guns definitely play the role '}, {'emotion': 'Sadness', 'intensity': '2', 'reason': 'It seems partial and biased.'}, {'emotion': 'Sadness', 'intensity': '3', 'reason': 'I feel very sad.'}, {'emotion': 'Disgust', 'intensity': '4', 'reason': 'how is mental health only rela…	[{'emotion': 'Anger', 'intensity': '5', 'reason': 'I want to punch both of them '}, {'emotion': 'Disgust', 'intensity': '1', 'reason': "I'm not sure what's going on in the photo but in the context of gun violence paired with trump, it doesn't make me feel positive. I don't think Trump has ever done anything positive in terms of gun violence. "}, {'emotion': 'Disgust', 'intensity': '5', 'reason': …	[{'emotion': 'Sadness', 'intensity': '3', 'reason': 'mental health is usually the reason people use to justify criminal behavior of young white men. this charged headline addresses yet another ugly corner.', 'url': 'anonymous-source/all_shooting_images_newest/10900.jpg'}, {'emotion': 'Fear', 'intensity': '3', 'reason': 'I dont understand the connection', 'url': 'anonymous-source/all_shooting_imag…
252	Obama calls on Americans 'to fight the rise of anti-Semitism' after synagogue shooting	anonymous-source/all_shooting_images_newest/100452.jpg	[{'emotion': 'Contentment', 'intensity': '5', 'reason': 'I agree.'}, {'emotion': 'Contentment', 'intensity': '4', 'reason': 'we should fight against racism '}, {'emotion': 'Awe', 'intensity': '4', 'reason': 'This point of view would alleviate the issue.'}, {'emotion': 'Sadness', 'intensity': '4', 'reason': 'Sadly, the Department of Education is letting teachers buy guns because the prevalence of …	[{'emotion': 'Sadness', 'intensity': '4', 'reason': 'miss Obama '}, {'emotion': 'Sadness', 'intensity': '1', 'reason': "this makes me feel like something bad just happened and he's holding a sad press conference to talk about it and offer condolances. There is nothing in the image that hints that it could be positive news or anything light. "}, {'emotion': 'Fear', 'intensity': '2', 'reason': 'he …	[{'emotion': 'Sadness', 'intensity': '3', 'reason': 'i am proud that the former president chose to speak up against that violence.', 'url': 'anonymous-source/all_shooting_images_newest/100452.jpg'}, {'emotion': 'Awe', 'intensity': '3', 'reason': 'Americans will follow him', 'url': 'anonymous-source/all_shooting_images_newest/100452.jpg'}, {'emotion': 'Excitement', 'intensity': '3', 'reason': "I a…
253	The Capital Gazette shooting and the limits of an assault weapons ban	anonymous-source/all_shooting_images_newest/10151.jpg	[{'emotion': 'Sadness', 'intensity': '2', 'reason': 'Assault weapons need to be banned.'}, {'emotion': 'Fear', 'intensity': '4', 'reason': "I'm afraid of the limits of the ban."}, {'emotion': 'Contentment', 'intensity': '2', 'reason': 'I would like to know more about the limits of the ban to better protect myself.'}, {'emotion': 'Sadness', 'intensity': '4', 'reason': 'I feel the social environmen…	[{'emotion': 'Anger', 'intensity': '4', 'reason': 'another weapon that could carry out a mass shooting'}, {'emotion': 'Anger', 'intensity': '2', 'reason': 'This looks like an assault rifle so it makes me feel like someone got their hands on one (when there was no need) and then committed a crime. '}, {'emotion': 'Fear', 'intensity': '4', 'reason': 'big guns are scary and unnecessary '}, {'emotion…	[{'emotion': 'Anger', 'intensity': '2', 'reason': 'another shooting occurring makes me sad. this headline also hints that it is going to weighs the cons of a weapon ban.', 'url': 'anonymous-source/all_shooting_images_newest/10151.jpg'}, {'emotion': 'Fear', 'intensity': '3', 'reason': 'I am scared of shootings', 'url': 'anonymous-source/all_shooting_images_newest/10151.jpg'}, {'emotion': 'Fear', '…
254	Students rally for action on guns outside US Capitol	anonymous-source/all_shooting_images_newest/10083.jpg	[{'emotion': 'Excitement', 'intensity': '5', 'reason': 'I support this movement.'}, {'emotion': 'Excitement', 'intensity': '4', 'reason': "I think it's the right action "}, {'emotion': 'Awe', 'intensity': '4', 'reason': 'Students are fighting for safety.'}, {'emotion': 'Fear', 'intensity': '4', 'reason': "I'm worried about the safety of society."}, {'emotion': 'Awe', 'intensity': '4', 'reason': '…	[{'emotion': 'Awe', 'intensity': '5', 'reason': 'because youth are protesting gun violence'}, {'emotion': 'Anger', 'intensity': '1', 'reason': "I'm angry with them because more kids probably just died, and I'm disappointed at the lawmakers. "}, {'emotion': 'Sadness', 'intensity': '5', 'reason': 'thinking about kids having to go to school in fear is sad'}, {'emotion': 'Sadness', 'intensity': '2', …	[{'emotion': 'Awe', 'intensity': '4', 'reason': 'i am proud of the youth for speaking up for what they believe in.', 'url': 'anonymous-source/all_shooting_images_newest/10083.jpg'}, {'emotion': 'Awe', 'intensity': '3', 'reason': 'Seeing students take a stand is inspiring ', 'url': 'anonymous-source/all_shooting_images_newest/10083.jpg'}, {'emotion': 'Excitement', 'intensity': '3', 'reason': "I'm …
255	How We Mourned' memorializes Las Vegas mass shooting	anonymous-source/all_shooting_images_newest/90038.jpg	[{'emotion': 'Sadness', 'intensity': '3', 'reason': 'The Las Vegas shooting was a tragedy.'}, {'emotion': 'Sadness', 'intensity': '3', 'reason': 'feel bad about the victims '}, {'emotion': 'Sadness', 'intensity': '4', 'reason': 'Because innocent people were killed in the shooting.'}, {'emotion': 'Fear', 'intensity': '4', 'reason': "People shouldn't have guns when they're young."}, {'emotion': 'Sa…	[{'emotion': 'Sadness', 'intensity': '5', 'reason': 'that those people lost their lives'}, {'emotion': 'Sadness', 'intensity': '3', 'reason': "I feel bad for the victims. I'm sad that they lost their lives in such a horrible way. "}, {'emotion': 'Sadness', 'intensity': '5', 'reason': 'so many people lost their lives for no reason'}, {'emotion': 'Sadness', 'intensity': '2', 'reason': 'Many people …	[{'emotion': 'Sadness', 'intensity': '3', 'reason': 'this should have never happened. innocent lives were lost.', 'url': 'anonymous-source/all_shooting_images_newest/90038.jpg'}, {'emotion': 'Sadness', 'intensity': '3', 'reason': 'The las vegas shooting was tragic', 'url': 'anonymous-source/all_shooting_images_newest/90038.jpg'}, {'emotion': 'Sadness', 'intensity': '5', 'reason': "the shooting sh…
256	Alabama mall shooting: Police admit they killed innocent black man by mistake as true Thanksgiving gunman remains at large	anonymous-source/all_shooting_images_newest/110505.jpg	[{'emotion': 'Disgust', 'intensity': '5', 'reason': 'Things like this happen all the time to black people.'}, {'emotion': 'Anger', 'intensity': '4', 'reason': "I think the police's action was really bad "}, {'emotion': 'Anger', 'intensity': '2', 'reason': 'Policemen apologize for killing a human life.'}, {'emotion': 'Anger', 'intensity': '4', 'reason': 'I am outraged by this gratuitous racial dis…	[{'emotion': 'Sadness', 'intensity': '4', 'reason': 'because another mass shooting probably occurred '}, {'emotion': 'Fear', 'intensity': '3', 'reason': 'there was a shooting near me that happened at a store like JCPenney, and it was scary. This reminds me of it. '}, {'emotion': 'Sadness', 'intensity': '2', 'reason': 'you can tell something bad happened'}, {'emotion': 'Sadness', 'intensity': '2',…	[{'emotion': 'Anger', 'intensity': '3', 'reason': 'another victim of racial profiling. ', 'url': 'anonymous-source/all_shooting_images_newest/110505.jpg'}, {'emotion': 'Anger', 'intensity': '3', 'reason': 'The police had a racial bias', 'url': 'anonymous-source/all_shooting_images_newest/110505.jpg'}, {'emotion': 'Anger', 'intensity': '5', 'reason': 'they are disproportionately harsher on black m…
257	Slowik: League of Women Voters unfazed by gun group's 'threat alert'	anonymous-source/all_shooting_images_newest/10325.jpg	[{'emotion': 'Contentment', 'intensity': '3', 'reason': 'They are showing their strength.'}, {'emotion': 'Fear', 'intensity': '3', 'reason': 'how can the sexism exists '}, {'emotion': 'Awe', 'intensity': '4', 'reason': 'The voters are sticking to their opinions.'}, {'emotion': 'Sadness', 'intensity': '4', 'reason': 'I feel sad for the victim.'}, {'emotion': 'Fear', 'intensity': '4', 'reason': 'it…	[{'emotion': 'Amusement', 'intensity': '3', 'reason': 'as to who she is '}, {'emotion': 'Awe', 'intensity': '1', 'reason': "I'm not sure what is happening in this photo, but nothing is setting off alarm bells. I am curious because I want to know more. "}, {'emotion': 'Sadness', 'intensity': '3', 'reason': 'dont know who it is but gun violence in relation to schools is never good'}, {'emotion': 'S…	[{'emotion': 'Disgust', 'intensity': '3', 'reason': 'n/a', 'url': 'anonymous-source/all_shooting_images_newest/10325.jpg'}, {'emotion': 'Fear', 'intensity': '3', 'reason': 'Nobody should feel threatened ', 'url': 'anonymous-source/all_shooting_images_newest/10325.jpg'}, {'emotion': 'Fear', 'intensity': '3', 'reason': 'i would be extremely fearful if I got a threat.', 'url': 'anonymous-source/all_…
258	Kanye West donates $150,000 to family of black security guard killed by police after stopping gunman: report | TheHill	anonymous-source/all_shooting_images_newest/110137.jpg	[{'emotion': 'Contentment', 'intensity': '5', 'reason': 'Happy to see his family being supported after their loss.'}, {'emotion': 'Sadness', 'intensity': '4', 'reason': "I feel so bad about the black security guard's experience "}, {'emotion': 'Contentment', 'intensity': '4', 'reason': 'A public figure is making an effort to support the family in needed.'}, {'emotion': 'Fear', 'intensity': '4', '…	[{'emotion': 'Amusement', 'intensity': '5', 'reason': 'yeezy yeezy trolling ode hah '}, {'emotion': 'Anger', 'intensity': '1', 'reason': "he hasn't done anything positive in terms of gun violence and has said several insensitive things. "}, {'emotion': 'Disgust', 'intensity': '1', 'reason': 'kanye is not a great person because he supports trump'}, {'emotion': 'Anger', 'intensity': '2', 'reason': …	[{'emotion': 'Awe', 'intensity': '3', 'reason': 'it is an incredibly kind gesture but alas it does not solve any problems. this should not take away from the issue at the center of the donation.', 'url': 'anonymous-source/all_shooting_images_newest/110137.jpg'}, {'emotion': 'Awe', 'intensity': '3', 'reason': 'I dont like kanye west but this is something nice', 'url': 'anonymous-source/all_shootin…
259	Did Florida Yoga Studio Gunman Want to Get Revenge on Women for Rejecting Him?	anonymous-source/all_shooting_images_newest/110078.jpg	[{'emotion': 'Anger', 'intensity': '3', 'reason': 'It is upsetting to hear someone lose their life because the gunman wanted to get revenge for being rejected by women'}, {'emotion': 'Disgust', 'intensity': '3', 'reason': 'I feel angry and disgusted because I really empathy the woman'}, {'emotion': 'Sadness', 'intensity': '2', 'reason': 'he probably did '}, {'emotion': 'Anger', 'intensity': '4', …	[{'emotion': 'Sadness', 'intensity': '3', 'reason': 'Odd photo that makes no sense in the context of gun violence'}, {'emotion': 'Disgust', 'intensity': '1', 'reason': 'Disgust\r\n'}, {'emotion': 'Anger', 'intensity': '1', 'reason': 'Given that this is about gun violence, I wonder if this man has committed some sort of act of violence'}, {'emotion': 'Fear', 'intensity': '4', 'reason': "the person…	[{'emotion': 'Fear', 'intensity': '1', 'reason': 'The revenge came easily', 'url': 'anonymous-source/all_shooting_images_newest/110078.jpg'}, {'emotion': 'Anger', 'intensity': '3', 'reason': 'How can a person get revenge just because a women rejected him and the picture is too flirty which makes me more angry', 'url': 'anonymous-source/all_shooting_images_newest/110078.jpg'}, {'emotion': 'Disgust…
260	Lakers will honor victims of Thousand Oaks shooting at next home game	anonymous-source/all_shooting_images_newest/110373.jpg	[{'emotion': 'Sadness', 'intensity': '3', 'reason': 'its sad to hear about people who were hurt or killed by a shooting an while honoring them is good its sad to think about the affect on their family and friends for the people killed.'}, {'emotion': 'Contentment', 'intensity': '3', 'reason': 'I like the Lakers and I feel happy that they do something to make change'}, {'emotion': 'Awe', 'intensit…	[{'emotion': 'Sadness', 'intensity': '3', 'reason': 'The man is crying'}, {'emotion': 'Sadness', 'intensity': '5', 'reason': 'Sadness\r\n'}, {'emotion': 'Sadness', 'intensity': '4', 'reason': 'I feel bad for these people who have clearly suffered a loss'}, {'emotion': 'Sadness', 'intensity': '3', 'reason': "Gun violence is a huge issue in our society and it's sad to see so many people affected du…	[{'emotion': 'Sadness', 'intensity': '1', 'reason': "Can't relate", 'url': 'anonymous-source/all_shooting_images_newest/110373.jpg'}, {'emotion': 'Sadness', 'intensity': '3', 'reason': 'the man in the picture is crying', 'url': 'anonymous-source/all_shooting_images_newest/110373.jpg'}, {'emotion': 'Awe', 'intensity': '3', 'reason': 'it is a nice action but still sad', 'url': 'anonymous-source/all…
261	Donald Trump Addresses Florida Shooting, Rejects Response That Just Makes Us Feel Better	anonymous-source/all_shooting_images_newest/10765.jpg	[{'emotion': 'Contentment', 'intensity': '3', 'reason': 'Im happy that Trump addressed the shooting and is paying respect to those who were killed or hurt.'}, {'emotion': 'Contentment', 'intensity': '3', 'reason': 'I am content because of his attitudes '}, {'emotion': 'Disgust', 'intensity': '1', 'reason': "I don't care what this man has to say"}, {'emotion': 'Anger', 'intensity': '4', 'reason': …	[{'emotion': 'Disgust', 'intensity': '5', 'reason': 'Donald Trump is an offensive person'}, {'emotion': 'Anger', 'intensity': '1', 'reason': 'Anger\r\n'}, {'emotion': 'Anger', 'intensity': '3', 'reason': 'I do not like this politician'}, {'emotion': 'Disgust', 'intensity': '3', 'reason': "Trump pretty much stands for violence given his involvement in the capitol riots. So it's irritating to see h…	[{'emotion': 'Fear', 'intensity': '1', 'reason': 'Not sure about what this news is trying to talk about', 'url': 'anonymous-source/all_shooting_images_newest/10765.jpg'}, {'emotion': 'Fear', 'intensity': '1', 'reason': 'everything is neutral', 'url': 'anonymous-source/all_shooting_images_newest/10765.jpg'}, {'emotion': 'Disgust', 'intensity': '3', 'reason': 'he can say whatever he wants but the f…
262	Piers Morgan Turns On 'Coward' Trump, Tells Him To 'Grow A Pair' On Gun Control	anonymous-source/all_shooting_images_newest/100106.jpg	[{'emotion': 'Anger', 'intensity': '3', 'reason': 'It angers me that Morgan is calling Trump a coward and to grow a pair. I can understand wanting to bring change to gun control but at least do it in a respectful way and not just calling Trump names'}, {'emotion': 'Amusement', 'intensity': '3', 'reason': 'The complexity of the power behind this news triggered my apoliticism'}, {'emotion': 'Disgus…	[{'emotion': 'Anger', 'intensity': '5', 'reason': 'Tired of Trump slwoing US social progress'}, {'emotion': 'Disgust', 'intensity': '1', 'reason': 'Disgust\r\n'}, {'emotion': 'Anger', 'intensity': '5', 'reason': 'I do not like the political figures'}, {'emotion': 'Disgust', 'intensity': '3', 'reason': "Don't have context about this "}, {'emotion': 'Anger', 'intensity': '1', 'reason': 'yelling wit…	[{'emotion': 'Amusement', 'intensity': '1', 'reason': 'The conflict reads funny', 'url': 'anonymous-source/all_shooting_images_newest/100106.jpg'}, {'emotion': 'Fear', 'intensity': '3', 'reason': 'everything is neutral', 'url': 'anonymous-source/all_shooting_images_newest/100106.jpg'}, {'emotion': 'Amusement', 'intensity': '3', 'reason': 'when did politicians became so unprofessional', 'url': 'an…
263	Judge blocks release of 3D-printed gun plans one day after Jacksonville Madden shooting	anonymous-source/all_shooting_images_newest/162.jpg	[{'emotion': 'Contentment', 'intensity': '3', 'reason': 'Im happy judge is preventing the release of 3D guns so there is less guns given to people and hopefully less shooting'}, {'emotion': 'Fear', 'intensity': '3', 'reason': 'I think there might be more unsupervised 3D printing guns models online in the future '}, {'emotion': 'Excitement', 'intensity': '1', 'reason': "good but should've done thi…	[{'emotion': 'Fear', 'intensity': '5', 'reason': "It's a gun"}, {'emotion': 'Fear', 'intensity': '4', 'reason': 'Fear\r\n'}, {'emotion': 'Fear', 'intensity': '3', 'reason': 'I worry that this is some sort of method of concealing a weapon'}, {'emotion': 'Contentment', 'intensity': '3', 'reason': 'dont have enough context for this'}, {'emotion': 'Fear', 'intensity': '4', 'reason': 'I am afraid of a…	[{'emotion': 'Fear', 'intensity': '1', 'reason': "The picture doesn't look dangerous", 'url': 'anonymous-source/all_shooting_images_newest/162.jpg'}, {'emotion': 'Contentment', 'intensity': '3', 'reason': 'its good to see judge blocked the release of 3d print gun plans', 'url': 'anonymous-source/all_shooting_images_newest/162.jpg'}, {'emotion': 'Contentment', 'intensity': '3', 'reason': 'as they …
264	Medical professionals refuse to stay in their own lane on gun violence	anonymous-source/all_shooting_images_newest/110253.jpg	[{'emotion': 'Anger', 'intensity': '3', 'reason': 'I think medical professionals should be able to share their own opinions on gun violence and anything they want. Everyone has freedom of speech and can express the opinion.'}, {'emotion': 'Contentment', 'intensity': '3', 'reason': 'Professionals giving their opinions on gun control will promote the sessions. '}, {'emotion': 'Amusement', 'intensit…	[{'emotion': 'Fear', 'intensity': '5', 'reason': 'Those guns are threatening'}, {'emotion': 'Anger', 'intensity': '4', 'reason': 'Anger\r\n'}, {'emotion': 'Anger', 'intensity': '3', 'reason': 'I do not think guns like this should be so readily available'}, {'emotion': 'Contentment', 'intensity': '3', 'reason': 'dont have enough context for this'}, {'emotion': 'Fear', 'intensity': '3', 'reason': "…	[{'emotion': 'Sadness', 'intensity': '1', 'reason': 'Not sure about the 5Ws about the news', 'url': 'anonymous-source/all_shooting_images_newest/110253.jpg'}, {'emotion': 'Fear', 'intensity': '2', 'reason': 'there are so many guns in the picture', 'url': 'anonymous-source/all_shooting_images_newest/110253.jpg'}, {'emotion': 'Contentment', 'intensity': '3', 'reason': 'its nice to see that some peo…
265	The Alabama mall shooting highlights the dangers of owning a gun while black	anonymous-source/all_shooting_images_newest/110512.jpg	[{'emotion': 'Anger', 'intensity': '4', 'reason': 'I think this headline is discriminating against blacks and saying one persons behavior applies to how all blacks behave. This makes me mad to hear this racist and terrible headline'}, {'emotion': 'Anger', 'intensity': '3', 'reason': 'This reminds me of BLM'}, {'emotion': 'Sadness', 'intensity': '2', 'reason': 'the double standards are dangerous '…	[{'emotion': 'Excitement', 'intensity': '4', 'reason': 'Symbolization of progress'}, {'emotion': 'Contentment', 'intensity': '5', 'reason': 'Contentment\r\n'}, {'emotion': 'Awe', 'intensity': '3', 'reason': "I think it's great to see people protesting for what they believe in"}, {'emotion': 'Sadness', 'intensity': '3', 'reason': "Gun violence is a huge issue in our society and it's sad to see so …	[{'emotion': 'Sadness', 'intensity': '1', 'reason': 'disagree with linking owning the gun to race', 'url': 'anonymous-source/all_shooting_images_newest/110512.jpg'}, {'emotion': 'Anger', 'intensity': '3', 'reason': 'this is racist', 'url': 'anonymous-source/all_shooting_images_newest/110512.jpg'}, {'emotion': 'Anger', 'intensity': '3', 'reason': 'people have to die for people to start making acti…
266	Jacksonville councilman on shooting: We've got a problem with guns and faith	anonymous-source/all_shooting_images_newest/412.jpg	[{'emotion': 'Sadness', 'intensity': '3', 'reason': 'Its sad to think of all the shooting that have happened in America and the people hurt or killed in the process'}, {'emotion': 'Contentment', 'intensity': '3', 'reason': "I don't have many feelings because I am not familiar with religious issues."}, {'emotion': 'Anger', 'intensity': '1', 'reason': 'why faith '}, {'emotion': 'Contentment', 'inte…	[{'emotion': 'Fear', 'intensity': '1', 'reason': "not sure what's going on"}, {'emotion': 'Fear', 'intensity': '4', 'reason': 'Fear\r\n'}, {'emotion': 'Anger', 'intensity': '3', 'reason': 'I am upset to see a crime like this occur'}, {'emotion': 'Fear', 'intensity': '3', 'reason': 'it makes me realise that I can be a target to gun violence too '}, {'emotion': 'Sadness', 'intensity': '4', 'reason'…	[{'emotion': 'Sadness', 'intensity': '1', 'reason': 'not sure about the word faith', 'url': 'anonymous-source/all_shooting_images_newest/412.jpg'}, {'emotion': 'Sadness', 'intensity': '3', 'reason': 'sad to connect the word faith with gun', 'url': 'anonymous-source/all_shooting_images_newest/412.jpg'}, {'emotion': 'Sadness', 'intensity': '3', 'reason': 'bc is the reality', 'url': 'anonymous-sourc…
267	Dick's Sporting Goods' gun policy, Under Armour weighs on sales	anonymous-source/all_shooting_images_newest/64.jpg	[{'emotion': 'Disgust', 'intensity': '3', 'reason': 'its disgusting that under armor is focused on getting money by selling guns and many people are killed because of guns'}, {'emotion': 'Contentment', 'intensity': '3', 'reason': 'Business news that reports numbers does not really trigger my feelings'}, {'emotion': 'Contentment', 'intensity': '1', 'reason': "ok you loss money oh no at least peopl…	[{'emotion': 'Contentment', 'intensity': '3', 'reason': "I don't have an opinon on Dick's"}, {'emotion': 'Contentment', 'intensity': '3', 'reason': 'Contentment\r\n'}, {'emotion': 'Contentment', 'intensity': '1', 'reason': 'I do not know what this image has to do with the topic'}, {'emotion': 'Anger', 'intensity': '3', 'reason': "guns and ammunition shouldn't be available to public so easily "}, …	[{'emotion': 'Fear', 'intensity': '1', 'reason': 'cannot relate to the news', 'url': 'anonymous-source/all_shooting_images_newest/64.jpg'}, {'emotion': 'Awe', 'intensity': '1', 'reason': 'everything seems neutral', 'url': 'anonymous-source/all_shooting_images_newest/64.jpg'}, {'emotion': 'Contentment', 'intensity': '1', 'reason': 'it was under armor that made dicks stock fall', 'url': 'anonymous-…
268	Pharrell Williams sends Trump legal warning for playing 'Happy' after synagogue shooting	anonymous-source/all_shooting_images_newest/100176.jpg	[{'emotion': 'Anger', 'intensity': '3', 'reason': 'it makes me angry that Pharell Williams is sending legal warning for Trump being happy. It angers me that someone is mad at someone else being happy. '}, {'emotion': 'Amusement', 'intensity': '3', 'reason': 'This is more like a piece of entertainment news for me.'}, {'emotion': 'Amusement', 'intensity': '3', 'reason': "that's funny"}, {'emotion':…	[{'emotion': 'Contentment', 'intensity': '3', 'reason': 'I like Pharrell, great artist'}, {'emotion': 'Amusement', 'intensity': '3', 'reason': 'Amusement\r\n'}, {'emotion': 'Contentment', 'intensity': '1', 'reason': 'I am having a hard time recognizing the celebrity'}, {'emotion': 'Contentment', 'intensity': '3', 'reason': 'dont have context'}, {'emotion': 'Fear', 'intensity': '3', 'reason': "The…	[{'emotion': 'Amusement', 'intensity': '1', 'reason': 'the pic looks interesting', 'url': 'anonymous-source/all_shooting_images_newest/100176.jpg'}, {'emotion': 'Anger', 'intensity': '3', 'reason': 'how can trump play happy after gun shooting?', 'url': 'anonymous-source/all_shooting_images_newest/100176.jpg'}, {'emotion': 'Contentment', 'intensity': '3', 'reason': 'trump was in the wrong for doin…
269	Michigan man gets up to 10 years in prison for shooting at black teen asking for directions | TheHill	anonymous-source/all_shooting_images_newest/110094.jpg	[{'emotion': 'Contentment', 'intensity': '4', 'reason': 'Im happy that man was punished for killing a teen'}, {'emotion': 'Sadness', 'intensity': '3', 'reason': 'The way that CNN describes this story made me empathy with both characters in the news. '}, {'emotion': 'Sadness', 'intensity': '3', 'reason': 'only 10 years for murder '}, {'emotion': 'Sadness', 'intensity': '4', 'reason': 'I am tired o…	[{'emotion': 'Fear', 'intensity': '3', 'reason': "Not sure what's going on"}, {'emotion': 'Contentment', 'intensity': '3', 'reason': 'Contentment\r\n'}, {'emotion': 'Fear', 'intensity': '3', 'reason': "I am worried about the safety of this man's neighbors"}, {'emotion': 'Contentment', 'intensity': '3', 'reason': 'dont have context '}, {'emotion': 'Fear', 'intensity': '3', 'reason': 'I am afraid t…	[{'emotion': 'Sadness', 'intensity': '1', 'reason': 'sad about the story', 'url': 'anonymous-source/all_shooting_images_newest/110094.jpg'}, {'emotion': 'Sadness', 'intensity': '3', 'reason': 'I feel sad for the 10 years old kid and also angry because the man is racist', 'url': 'anonymous-source/all_shooting_images_newest/110094.jpg'}, {'emotion': 'Disgust', 'intensity': '3', 'reason': 'he should…
270	The World Moves On And You Don t. Parents Who Lost Children in School Shootings Find Comfort in a Group No One Wants to Join	anonymous-source/all_shooting_images_newest/110437.jpg	[{'emotion': 'Sadness', 'intensity': '3', 'reason': 'Its sad to think of the pain that parents face after their children are killed'}, {'emotion': 'Sadness', 'intensity': '3', 'reason': 'Narratives make me empathy'}, {'emotion': 'Sadness', 'intensity': '3', 'reason': 'sad to lose a kid'}, {'emotion': 'Awe', 'intensity': '4', 'reason': 'Such tragedy bringing people together makes me grateful for w…	[{'emotion': 'Contentment', 'intensity': '3', 'reason': 'I feel confused by the emotions of each person. They look very emotionless and still'}, {'emotion': 'Sadness', 'intensity': '3', 'reason': 'Sadness\r\n'}, {'emotion': 'Contentment', 'intensity': '3', 'reason': 'These people are clearly taking a strong stance against gun violence and uniting together'}, {'emotion': 'Contentment', 'intensity'…	[{'emotion': 'Sadness', 'intensity': '1', 'reason': 'the tone of the picture looks sad', 'url': 'anonymous-source/all_shooting_images_newest/110437.jpg'}, {'emotion': 'Sadness', 'intensity': '3', 'reason': 'it is sad to lose kids and people in the picture seem sad', 'url': 'anonymous-source/all_shooting_images_newest/110437.jpg'}, {'emotion': 'Sadness', 'intensity': '3', 'reason': 'it is not fair…
271	Congress eyes school safety, but not major gun control overhaul	anonymous-source/all_shooting_images_newest/10767.jpg	[{'emotion': 'Anger', 'intensity': '3', 'reason': "It angers me that they say they want schools to safer but aren't doing anything regarding gun control"}, {'emotion': 'Anger', 'intensity': '3', 'reason': 'I would like to see some real movements instead of words as to congress and gun control'}, {'emotion': 'Sadness', 'intensity': '3', 'reason': 'our political system is broken'}, {'emotion': 'Dis…	[{'emotion': 'Disgust', 'intensity': '5', 'reason': 'Trump is spewing unproven and unthoughtful communication in this image'}, {'emotion': 'Contentment', 'intensity': '3', 'reason': 'Contentment'}, {'emotion': 'Anger', 'intensity': '4', 'reason': 'I do not like this politician'}, {'emotion': 'Disgust', 'intensity': '3', 'reason': 'trump is a conservative and im a liberal'}, {'emotion': 'Excitemen…	[{'emotion': 'Amusement', 'intensity': '1', 'reason': 'the headline is trying to form a contrast', 'url': 'anonymous-source/all_shooting_images_newest/10767.jpg'}, {'emotion': 'Anger', 'intensity': '1', 'reason': "I don't like trump ", 'url': 'anonymous-source/all_shooting_images_newest/10767.jpg'}, {'emotion': 'Disgust', 'intensity': '3', 'reason': 'he does nothing', 'url': 'anonymous-source/all…
272	Protestors Gather as Trump Family Visits Pittsburgh for Tree of Life Synagogue Shooting	anonymous-source/all_shooting_images_newest/100117.jpg	[{'emotion': 'Anger', 'intensity': '3', 'reason': 'it angers me that people are protesting against trump but all he is doing is visiting a place where a shooting occurred'}, {'emotion': 'Contentment', 'intensity': '3', 'reason': '.'}, {'emotion': 'Disgust', 'intensity': '1', 'reason': 'fuck trump'}, {'emotion': 'Contentment', 'intensity': '4', 'reason': 'He has no business being there with all of…	[{'emotion': 'Disgust', 'intensity': '4', 'reason': 'He is misogynistic '}, {'emotion': 'Contentment', 'intensity': '3', 'reason': 'Contentment'}, {'emotion': 'Anger', 'intensity': '2', 'reason': 'If this political figure is paying respects, he should take action to stop things like this from happening'}, {'emotion': 'Disgust', 'intensity': '3', 'reason': 'trump is a quite conservative'}, {'emoti…	[{'emotion': 'Sadness', 'intensity': '1', 'reason': "don't know about the context", 'url': 'anonymous-source/all_shooting_images_newest/100117.jpg'}, {'emotion': 'Anger', 'intensity': '1', 'reason': "I don't like trump", 'url': 'anonymous-source/all_shooting_images_newest/100117.jpg'}, {'emotion': 'Disgust', 'intensity': '3', 'reason': 'act like he cares but he doesnt', 'url': 'anonymous-source/a…
273	Breaking: Judge issues big decision on 3D printed guns hours before midnight deadline	anonymous-source/all_shooting_images_newest/171.jpg	[{'emotion': 'Contentment', 'intensity': '3', 'reason': 'Im happy that the judge made a big decision on printed guns and Im assuming that he made a decision to make restrictions to have printed guns'}, {'emotion': 'Fear', 'intensity': '3', 'reason': 'The word "Break" in the headline makes me feel nervous'}, {'emotion': 'Fear', 'intensity': '1', 'reason': '3d guns are dumb'}, {'emotion': 'Sadness'…	[{'emotion': 'Fear', 'intensity': '5', 'reason': 'Guns are scary'}, {'emotion': 'Anger', 'intensity': '3', 'reason': 'Anger\r\n'}, {'emotion': 'Fear', 'intensity': '1', 'reason': "I am not exactly sure what I'm looking at and I worry about what is being done with the gun"}, {'emotion': 'Contentment', 'intensity': '3', 'reason': 'dont have context '}, {'emotion': 'Fear', 'intensity': '3', 'reason'…	[{'emotion': 'Amusement', 'intensity': '1', 'reason': "the picture doesn't look dangerous", 'url': 'anonymous-source/all_shooting_images_newest/171.jpg'}, {'emotion': 'Sadness', 'intensity': '1', 'reason': ' everything seems neutral', 'url': 'anonymous-source/all_shooting_images_newest/171.jpg'}, {'emotion': 'Contentment', 'intensity': '3', 'reason': 'the cancelled the sale that shouldnt have exi…
274	Image Firearms Industry Appears Stuck in the Doldrums Interest in hunting products at Dick s Sporting Goods is sliding, background checks for firearms fell on Black Friday and pressure from Wall Street isn t letting up. By Tiffany Hsu	anonymous-source/all_shooting_images_newest/110267.jpg	[{'emotion': 'Fear', 'intensity': '3', 'reason': 'Im scared that a kid or child could have hold of the gun which scares me on the people that could be hurt or killed'}, {'emotion': 'Disgust', 'intensity': '3', 'reason': 'There are too many power relations in this headline'}, {'emotion': 'Disgust', 'intensity': '1', 'reason': 'what is this saying'}, {'emotion': 'Fear', 'intensity': '4', 'reason': …	[{'emotion': 'Fear', 'intensity': '5', 'reason': 'Why does someone have or need that many guns...'}, {'emotion': 'Anger', 'intensity': '3', 'reason': 'Anger\r\n'}, {'emotion': 'Anger', 'intensity': '4', 'reason': 'Guns should not be this readily available for purchase'}, {'emotion': 'Sadness', 'intensity': '3', 'reason': 'arms shouldnt be easily accessible for general public '}, {'emotion': 'Ange…	[{'emotion': 'Fear', 'intensity': '1', 'reason': 'feel nothing special actually', 'url': 'anonymous-source/all_shooting_images_newest/110267.jpg'}, {'emotion': 'Fear', 'intensity': '1', 'reason': 'the picture is scary with too many guns', 'url': 'anonymous-source/all_shooting_images_newest/110267.jpg'}, {'emotion': 'Fear', 'intensity': '3', 'reason': 'fire arms should not get easier to access', '…
275	Parkland survivors keep memory of shooting alive	anonymous-source/all_shooting_images_newest/10004.jpg	[{'emotion': 'Sadness', 'intensity': '3', 'reason': 'Its sad to think about people who were killed in shooting'}, {'emotion': 'Awe', 'intensity': '3', 'reason': "It's nice that people remember. "}, {'emotion': 'Fear', 'intensity': '1', 'reason': 'were truly traumatizing these kids'}, {'emotion': 'Sadness', 'intensity': '3', 'reason': 'This is a very tragic event '}, {'emotion': 'Fear', 'intensity…	[{'emotion': 'Sadness', 'intensity': '4', 'reason': 'Someone had died at that school. It is heartbreaking'}, {'emotion': 'Sadness', 'intensity': '4', 'reason': 'Sadness\r\n'}, {'emotion': 'Sadness', 'intensity': '3', 'reason': 'I feel bad for the victims and loved ones'}, {'emotion': 'Sadness', 'intensity': '4', 'reason': "it's sad to see people be affected due to this"}, {'emotion': 'Sadness', '…	[{'emotion': 'Sadness', 'intensity': '1', 'reason': 'although the picture is colorful, the headline and the story it tells is sad', 'url': 'anonymous-source/all_shooting_images_newest/10004.jpg'}, {'emotion': 'Contentment', 'intensity': '1', 'reason': 'it is good to see people remembering the deaths and all the hearts in the pic are really cute', 'url': 'anonymous-source/all_shooting_images_newes…
276	Shooting at Jacksonville Videogame Event Puts Focus on Security	anonymous-source/all_shooting_images_newest/434.jpg	[{'emotion': 'Contentment', 'intensity': '3', 'reason': 'more measures are being put to ensure everyone is safe and hopefully prevent future shootings'}, {'emotion': 'Fear', 'intensity': '3', 'reason': 'When gun violence and big events are connected, it makes me feel insecure. '}, {'emotion': 'Sadness', 'intensity': '1', 'reason': 'solution to result not a solution to the problem'}, {'emotion': '…	[{'emotion': 'Fear', 'intensity': '3', 'reason': 'A police officer is out and about on patrol'}, {'emotion': 'Fear', 'intensity': '3', 'reason': 'Fear\r\n'}, {'emotion': 'Fear', 'intensity': '2', 'reason': 'I am worried about what has happened at this scene'}, {'emotion': 'Contentment', 'intensity': '3', 'reason': 'dont have context'}, {'emotion': 'Sadness', 'intensity': '3', 'reason': 'police ta…	[{'emotion': 'Sadness', 'intensity': '1', 'reason': 'feel nothing special. good to know', 'url': 'anonymous-source/all_shooting_images_newest/434.jpg'}, {'emotion': 'Sadness', 'intensity': '2', 'reason': 'shooting on a mass gathering is sad and also makes me fear', 'url': 'anonymous-source/all_shooting_images_newest/434.jpg'}, {'emotion': 'Contentment', 'intensity': '1', 'reason': 'more security'…
277	Dick's Sporting Goods' rough quarter had nothing to do with guns	anonymous-source/all_shooting_images_newest/72.jpg	[{'emotion': 'Contentment', 'intensity': '3', 'reason': "I don't undestand the headline"}, {'emotion': 'Contentment', 'intensity': '3', 'reason': "I'd like to see guns being regulated."}, {'emotion': 'Contentment', 'intensity': '1', 'reason': "okay I don't care about dicks loss in revenue "}, {'emotion': 'Amusement', 'intensity': '3', 'reason': 'This could be a counter to the argument that gun pu…	[{'emotion': 'Contentment', 'intensity': '3', 'reason': "it is a sports store and I don't feel much"}, {'emotion': 'Contentment', 'intensity': '3', 'reason': 'Contentment\r\n'}, {'emotion': 'Contentment', 'intensity': '2', 'reason': 'It looks like a nice store with plenty of good things to buy'}, {'emotion': 'Contentment', 'intensity': '3', 'reason': 'dont have context '}, {'emotion': 'Fear', 'in…	[{'emotion': 'Fear', 'intensity': '1', 'reason': "can't related to the news. looks far away from my life", 'url': 'anonymous-source/all_shooting_images_newest/72.jpg'}, {'emotion': 'Fear', 'intensity': '1', 'reason': 'everything seems neutral ', 'url': 'anonymous-source/all_shooting_images_newest/72.jpg'}, {'emotion': 'Contentment', 'intensity': '1', 'reason': 'it was under armour nothing to do w…
278	This mom called police after getting racist messages. That may have prevented a school shooting	anonymous-source/all_shooting_images_newest/100185.jpg	[{'emotion': 'Contentment', 'intensity': '3', 'reason': 'a shooting was prevented'}, {'emotion': 'Contentment', 'intensity': '3', 'reason': "I think news should guide citizens on how to deal racists' problems instead of making the problem worse"}, {'emotion': 'Awe', 'intensity': '2', 'reason': "happy we stopped it that's positive but this is not that moms job and im sad she got racist messages fr…	[{'emotion': 'Contentment', 'intensity': '3', 'reason': 'she seems nice but odd to contextualize this image in the eyes of gun violence'}, {'emotion': 'Contentment', 'intensity': '1', 'reason': 'Contentment\r\n'}, {'emotion': 'Disgust', 'intensity': '1', 'reason': 'I find this phrased to be overused and a bit annoying when used in its modern context'}, {'emotion': 'Sadness', 'intensity': '3', 're…	[{'emotion': 'Amusement', 'intensity': '1', 'reason': 'although the headline is sad, people in the picture looks happy', 'url': 'anonymous-source/all_shooting_images_newest/100185.jpg'}, {'emotion': 'Contentment', 'intensity': '3', 'reason': 'good job! and the women is smiling in the picture!', 'url': 'anonymous-source/all_shooting_images_newest/100185.jpg'}, {'emotion': 'Excitement', 'intensity'…
279	Alleged grocery store gunman had violent past, possible racial motives, mental health struggles	anonymous-source/all_shooting_images_newest/100116.jpg	[{'emotion': 'Fear', 'intensity': '3', 'reason': 'I am REALLY afraid of this kind of person who may do harm to me some days...'}, {'emotion': 'Contentment', 'intensity': '3', 'reason': 'sad story'}, {'emotion': 'Fear', 'intensity': '3', 'reason': 'The gunman is so dangerous.'}, {'emotion': 'Excitement', 'intensity': '3', 'reason': 'The Police made a right decision'}, {'emotion': 'Excitement', 'in…	[{'emotion': 'Fear', 'intensity': '5', 'reason': 'The aggressive expression of the man in the photo and the attitude that seems to wield violence immediately scares me.'}, {'emotion': 'Fear', 'intensity': '3', 'reason': 'the image is very scary'}, {'emotion': 'Contentment', 'intensity': '5', 'reason': 'The gunner (assumed) are put in the prison, which makes me feel contentment'}, {'emotion': 'Awe…	[{'emotion': 'Fear', 'intensity': '3', 'reason': 'The people in the picture makes me feel this is a scary news', 'url': 'anonymous-source/all_shooting_images_newest/100116.jpg'}, {'emotion': 'Fear', 'intensity': '3', 'reason': 'fear', 'url': 'anonymous-source/all_shooting_images_newest/100116.jpg'}, {'emotion': 'Disgust', 'intensity': '4', 'reason': "I'm glad that this man is going to get the hel…
280	Giffords, Nevada Democrats meet 1 year after Vegas shooting	anonymous-source/all_shooting_images_newest/100174.jpg	[{'emotion': 'Anger', 'intensity': '3', 'reason': 'Useless government...'}, {'emotion': 'Sadness', 'intensity': '3', 'reason': 'its sad'}, {'emotion': 'Awe', 'intensity': '3', 'reason': 'I want to know what they will talk about.'}, {'emotion': 'Sadness', 'intensity': '3', 'reason': 'It is a sad story that the gun control still need to be improved'}, {'emotion': 'Sadness', 'intensity': '3', 'reaso…	[{'emotion': 'Sadness', 'intensity': '2', 'reason': "A lover's sad expression makes me vague and sad."}, {'emotion': 'Sadness', 'intensity': '3', 'reason': 'it seems like they are mourning '}, {'emotion': 'Sadness', 'intensity': '5', 'reason': 'It seems that the couple is mourning the victim of gun violence'}, {'emotion': 'Fear', 'intensity': '3', 'reason': 'thy are so sad'}, {'emotion': 'Sadness…	[{'emotion': 'Fear', 'intensity': '3', 'reason': 'the picture makes me feel sad', 'url': 'anonymous-source/all_shooting_images_newest/100174.jpg'}, {'emotion': 'Fear', 'intensity': '3', 'reason': 'fear', 'url': 'anonymous-source/all_shooting_images_newest/100174.jpg'}, {'emotion': 'Sadness', 'intensity': '4', 'reason': "It's awful that these people have to experience such sad times and deep emoti…
281	SC Dems ask police to investigate GOP lawmaker pulling loaded gun in constituent meeting	anonymous-source/all_shooting_images_newest/10614.jpg	[{'emotion': 'Anger', 'intensity': '4', 'reason': 'WHAT IS WRONG WITH THESE PEOPLE????'}, {'emotion': 'Contentment', 'intensity': '3', 'reason': 'not sure'}, {'emotion': 'Fear', 'intensity': '3', 'reason': 'It is so dangerous.'}, {'emotion': 'Contentment', 'intensity': '3', 'reason': 'Can know more about the next step of gun control policy'}, {'emotion': 'Contentment', 'intensity': '3', 'reason':…	[{'emotion': 'Anger', 'intensity': '2', 'reason': "It looks like he's considering something important, but also his thoughtless eyes annoy me."}, {'emotion': 'Amusement', 'intensity': '3', 'reason': 'I do not understand who this is'}, {'emotion': 'Sadness', 'intensity': '1', 'reason': "I don't know who the guy is and how he relates to gun violence"}, {'emotion': 'Contentment', 'intensity': '3', '…	[{'emotion': 'Excitement', 'intensity': '1', 'reason': 'no feeling', 'url': 'anonymous-source/all_shooting_images_newest/10614.jpg'}, {'emotion': 'Awe', 'intensity': '3', 'reason': 'fear', 'url': 'anonymous-source/all_shooting_images_newest/10614.jpg'}, {'emotion': 'Contentment', 'intensity': '3', 'reason': 'Glad that there is attention being brought to troublesome situations. ', 'url': 'anonymou…
282	Sen. Nybo urges Gov. Rauner to sign SB 337, gun dealer licensure bill	anonymous-source/all_shooting_images_newest/90347.jpg	[{'emotion': 'Fear', 'intensity': '4', 'reason': 'Maybe many people will die one day because of this.'}, {'emotion': 'Contentment', 'intensity': '3', 'reason': 'not much to say'}, {'emotion': 'Contentment', 'intensity': '3', 'reason': 'A licensure bill may be helpful in gun control.'}, {'emotion': 'Contentment', 'intensity': '3', 'reason': "Don't understand what this news what to talk about"}, {'…	[{'emotion': 'Excitement', 'intensity': '3', 'reason': "They are giving a speech to change something, but I'm not sure whether it is to restrict guns or not."}, {'emotion': 'Amusement', 'intensity': '3', 'reason': 'I do not understand the context'}, {'emotion': 'Contentment', 'intensity': '4', 'reason': "I don't know what happened in this picture, just assume that they are proposing some kinds of…	[{'emotion': 'Fear', 'intensity': '3', 'reason': 'the picture makes me feel serious', 'url': 'anonymous-source/all_shooting_images_newest/90347.jpg'}, {'emotion': 'Anger', 'intensity': '3', 'reason': 'anger', 'url': 'anonymous-source/all_shooting_images_newest/90347.jpg'}, {'emotion': 'Excitement', 'intensity': '4', 'reason': "I'm glad that gun licenses are going to be more strict. ", 'url': 'ano…
283	Pittsburgh shooting suspect said he wanted all Jews to die: police	anonymous-source/all_shooting_images_newest/100451.jpg	[{'emotion': 'Anger', 'intensity': '4', 'reason': 'He is a racist.'}, {'emotion': 'Sadness', 'intensity': '3', 'reason': 'thats an awful human'}, {'emotion': 'Anger', 'intensity': '3', 'reason': 'It is racist.'}, {'emotion': 'Contentment', 'intensity': '3', 'reason': "Don't know the relationship between therapy dogs and Pittsburgh neighborhood shooting"}, {'emotion': 'Contentment', 'intensity': '…	[{'emotion': 'Fear', 'intensity': '4', 'reason': 'The polices in the picture look very serious and it makes me scary because something bad and serious is happening.'}, {'emotion': 'Sadness', 'intensity': '3', 'reason': 'the police need to do better'}, {'emotion': 'Sadness', 'intensity': '5', 'reason': 'This scene indicates that there was a gun violence incident happened in this building'}, {'emot…	[{'emotion': 'Fear', 'intensity': '1', 'reason': 'no feeling', 'url': 'anonymous-source/all_shooting_images_newest/100451.jpg'}, {'emotion': 'Sadness', 'intensity': '3', 'reason': 'sad', 'url': 'anonymous-source/all_shooting_images_newest/100451.jpg'}, {'emotion': 'Fear', 'intensity': '4', 'reason': 'It makes me very scared that there are people out there with the sole purpose of killing Jews. ',…
284	A suggestion for groups supporting gun control: Get your act together	anonymous-source/all_shooting_images_newest/10723.jpg	[{'emotion': 'Fear', 'intensity': '3', 'reason': 'Jesus... I just cannot believe that there is a group supporting gun violence...'}, {'emotion': 'Sadness', 'intensity': '3', 'reason': 'people need to act right'}, {'emotion': 'Excitement', 'intensity': '3', 'reason': 'By getting the act together, groups supporting gun control can be more supportive.'}, {'emotion': 'Contentment', 'intensity': '3', …	[{'emotion': 'Awe', 'intensity': '4', 'reason': 'The overall atmosphere and the guns in the picture make the whole thing heavy. However, it also raises questions about where the guns are and why they are displayed there.'}, {'emotion': 'Fear', 'intensity': '3', 'reason': 'guns are becoming common in the country'}, {'emotion': 'Fear', 'intensity': '4', 'reason': 'Though the guns are not pointing t…	[{'emotion': 'Fear', 'intensity': '2', 'reason': 'too many guns on the picture makes me feel scared', 'url': 'anonymous-source/all_shooting_images_newest/10723.jpg'}, {'emotion': 'Excitement', 'intensity': '3', 'reason': 'happy', 'url': 'anonymous-source/all_shooting_images_newest/10723.jpg'}, {'emotion': 'Fear', 'intensity': '4', 'reason': 'This seems like a mockery of gun control groups which i…
285	Hillary Clinton, gun-control groups, lawmakers unite on fundraiser for 'NR8' candidates	anonymous-source/all_shooting_images_newest/90202.jpg	[{'emotion': 'Sadness', 'intensity': '3', 'reason': "It will aggravate people's anxiety about the proliferation of guns."}, {'emotion': 'Contentment', 'intensity': '3', 'reason': 'not sure what it means'}, {'emotion': 'Sadness', 'intensity': '1', 'reason': "I can't understand the news headline."}, {'emotion': 'Sadness', 'intensity': '3', 'reason': "Don't know the relationship between gun control …	[{'emotion': 'Sadness', 'intensity': '5', 'reason': 'It saddens me to see the students passionately fighting for the safety of their school. '}, {'emotion': 'Sadness', 'intensity': '3', 'reason': 'children have to protest when adults should do better\r\n'}, {'emotion': 'Awe', 'intensity': '5', 'reason': 'They are brave and try to fight against the NRA to create a peaceful future.'}, {'emotion': '…	[{'emotion': 'Excitement', 'intensity': '1', 'reason': 'people in the picture are excited about this issue', 'url': 'anonymous-source/all_shooting_images_newest/90202.jpg'}, {'emotion': 'Amusement', 'intensity': '3', 'reason': 'happy', 'url': 'anonymous-source/all_shooting_images_newest/90202.jpg'}, {'emotion': 'Excitement', 'intensity': '4', 'reason': "I'm glad people are standing up against gun…
286	When the Second Amendment threatens the First, mass shootings are more likely	anonymous-source/all_shooting_images_newest/10155.jpg	[{'emotion': 'Fear', 'intensity': '3', 'reason': "It will aggravate people's anxiety about the proliferation of guns."}, {'emotion': 'Awe', 'intensity': '3', 'reason': 'taken aback'}, {'emotion': 'Fear', 'intensity': '3', 'reason': 'I am afraid of mass shootings.'}, {'emotion': 'Fear', 'intensity': '3', 'reason': 'You always can tell which person will become shooter because they usually looks lik…	[{'emotion': 'Awe', 'intensity': '4', 'reason': "I don't know why the people in the picture are taken away in a line, but I'm afraid that something bad has happened, so I'm afraid and curious at the same time."}, {'emotion': 'Fear', 'intensity': '3', 'reason': 'of the way people are being moved\r\n'}, {'emotion': 'Contentment', 'intensity': '4', 'reason': 'This scene usually happened when the pol…	[{'emotion': 'Sadness', 'intensity': '3', 'reason': 'no feeling', 'url': 'anonymous-source/all_shooting_images_newest/10155.jpg'}, {'emotion': 'Fear', 'intensity': '3', 'reason': 'happy', 'url': 'anonymous-source/all_shooting_images_newest/10155.jpg'}, {'emotion': 'Sadness', 'intensity': '4', 'reason': "It's so upsetting that the amendments are threatening one another. ", 'url': 'anonymous-source…
287	NRA Spokeswoman Dana Loesch Defends Trump By Comparing Him To Al Capone	anonymous-source/all_shooting_images_newest/286.jpg	[{'emotion': 'Disgust', 'intensity': '3', 'reason': "It will aggravate people's anxiety about the proliferation of guns."}, {'emotion': 'Sadness', 'intensity': '3', 'reason': 'this makes me sad'}, {'emotion': 'Amusement', 'intensity': '3', 'reason': 'It is a funny way to defend somebody.'}, {'emotion': 'Contentment', 'intensity': '3', 'reason': 'Far away from my daily life'}, {'emotion': 'Content…	[{'emotion': 'Excitement', 'intensity': '2', 'reason': "I don't know who the woman in the picture is, but her confident look makes me look forward to her and get excited."}, {'emotion': 'Amusement', 'intensity': '3', 'reason': 'I do not recognize the person\r\n'}, {'emotion': 'Sadness', 'intensity': '1', 'reason': 'Who is she, how does she relate to gun violence?'}, {'emotion': 'Excitement', 'int…	[{'emotion': 'Excitement', 'intensity': '3', 'reason': 'facial expression makes me feel serious', 'url': 'anonymous-source/all_shooting_images_newest/286.jpg'}, {'emotion': 'Anger', 'intensity': '3', 'reason': 'anger', 'url': 'anonymous-source/all_shooting_images_newest/286.jpg'}, {'emotion': 'Disgust', 'intensity': '4', 'reason': 'How can anyone defend Trump he has not helped the gun violence is…
288	Florida Police Issued An Arrest Warrant For A White Man Who Pulled A Gun On Black College Students	anonymous-source/all_shooting_images_newest/90095.jpg	[{'emotion': 'Fear', 'intensity': '4', 'reason': "It will aggravate people's anxiety about the proliferation of guns."}, {'emotion': 'Contentment', 'intensity': '3', 'reason': 'not sure what to say'}, {'emotion': 'Contentment', 'intensity': '3', 'reason': 'He deserves it.'}, {'emotion': 'Anger', 'intensity': '2', 'reason': 'Disgusting to hear these kinds of news'}, {'emotion': 'Anger', 'intensity…	[{'emotion': 'Fear', 'intensity': '4', 'reason': 'The man in the photo looks very menacing, and it scares me.'}, {'emotion': 'Fear', 'intensity': '3', 'reason': 'it seems like a confrontation\r\n'}, {'emotion': 'Sadness', 'intensity': '1', 'reason': 'Who is he, how does he relate to gun violence?'}, {'emotion': 'Excitement', 'intensity': '3', 'reason': 'WORLDSTAR'}, {'emotion': 'Fear', 'intensity…	[{'emotion': 'Fear', 'intensity': '3', 'reason': 'no feeling', 'url': 'anonymous-source/all_shooting_images_newest/90095.jpg'}, {'emotion': 'Excitement', 'intensity': '3', 'reason': 'happy', 'url': 'anonymous-source/all_shooting_images_newest/90095.jpg'}, {'emotion': 'Sadness', 'intensity': '4', 'reason': "It's upsetting that our country has gotten to the point where teachers are pulling guns on …
289	Man found guilty of firing gun at black teen who knocked on his door to ask for directions	anonymous-source/all_shooting_images_newest/100160.jpg	[{'emotion': 'Fear', 'intensity': '5', 'reason': "It was like you kill a people and you said sorry I didn't feel well..."}, {'emotion': 'Contentment', 'intensity': '3', 'reason': 'he should be guilty'}, {'emotion': 'Anger', 'intensity': '4', 'reason': 'The teen Tdid nothing wrong. The man is a lunatic.'}, {'emotion': 'Anger', 'intensity': '4', 'reason': 'The boy is totally innocent'}, {'emotion':…	[{'emotion': 'Sadness', 'intensity': '3', 'reason': 'The atmosphere in the photo itself makes him look like a criminal, but his sad eyes make me question about that.'}, {'emotion': 'Fear', 'intensity': '3', 'reason': 'I do not understand the context\r\n'}, {'emotion': 'Fear', 'intensity': '4', 'reason': "It looks like that he is the gunner in some incidents, however, I don't know the exact identi…	[{'emotion': 'Disgust', 'intensity': '3', 'reason': 'The headline makes me feel sad', 'url': 'anonymous-source/all_shooting_images_newest/100160.jpg'}, {'emotion': 'Awe', 'intensity': '3', 'reason': 'awe', 'url': 'anonymous-source/all_shooting_images_newest/100160.jpg'}, {'emotion': 'Sadness', 'intensity': '4', 'reason': 'Why would anyone feel the need to use a gun in this setting', 'url': 'anony…
290	Looking back at the Las Vegas mass shooting Photos	anonymous-source/all_shooting_images_newest/100284.jpg	[{'emotion': 'Fear', 'intensity': '4', 'reason': 'Death is terrifying for normal people.'}, {'emotion': 'Fear', 'intensity': '3', 'reason': 'guns are sketchy'}, {'emotion': 'Fear', 'intensity': '3', 'reason': 'I am afraid of seeing these photos.'}, {'emotion': 'Sadness', 'intensity': '4', 'reason': 'Willing to hear about the victim tell about the story and I can imagine the tragic situation'}, {'…	[{'emotion': 'Sadness', 'intensity': '4', 'reason': 'The empty eyes and dirty clothes of the woman in the photo make me predict how difficult it must have been for her. And the ambulance in the back makes the situation even more dramatic.'}, {'emotion': 'Sadness', 'intensity': '3', 'reason': 'the image shows desperation to me'}, {'emotion': 'Sadness', 'intensity': '5', 'reason': 'Apparently, this…	[{'emotion': 'Sadness', 'intensity': '3', 'reason': 'The picture is lonely', 'url': 'anonymous-source/all_shooting_images_newest/100284.jpg'}, {'emotion': 'Anger', 'intensity': '3', 'reason': 'anger', 'url': 'anonymous-source/all_shooting_images_newest/100284.jpg'}, {'emotion': 'Sadness', 'intensity': '5', 'reason': "It's so horrible that such an awful thing happened to so many innocent people. "…
291	Bloomberg's claims on gun control fail to match the facts	anonymous-source/all_shooting_images_newest/10624.jpg	[{'emotion': 'Sadness', 'intensity': '4', 'reason': "It will aggravate people's anxiety about the proliferation of guns."}, {'emotion': 'Contentment', 'intensity': '3', 'reason': 'not sure'}, {'emotion': 'Anger', 'intensity': '3', 'reason': 'His claims did not match the facts.'}, {'emotion': 'Sadness', 'intensity': '2', 'reason': "Don't know what Trump‘s current position is"}, {'emotion': 'Sadnes…	[{'emotion': 'Excitement', 'intensity': '1', 'reason': 'The confident expressions of the people in the photos seem to suggest something good, and it excited me.'}, {'emotion': 'Awe', 'intensity': '3', 'reason': 'of what the picture represents\r\n'}, {'emotion': 'Sadness', 'intensity': '1', 'reason': 'Who are they? How do they relate to gun violence?'}, {'emotion': 'Contentment', 'intensity': '3',…	[{'emotion': 'Fear', 'intensity': '3', 'reason': "This makes me feel serious because people's facial expression", 'url': 'anonymous-source/all_shooting_images_newest/10624.jpg'}, {'emotion': 'Disgust', 'intensity': '3', 'reason': 'disgust', 'url': 'anonymous-source/all_shooting_images_newest/10624.jpg'}, {'emotion': 'Contentment', 'intensity': '3', 'reason': "I don't know anything about Bloomberg…
292	Santa Fe High School Shooting Victim s Mother Confronts Ted Cruz at Town Hall: Don t Disrespect My Daughter	anonymous-source/all_shooting_images_newest/90369.jpg	[{'emotion': 'Sadness', 'intensity': '4', 'reason': 'I feel so sorry for the victims...'}, {'emotion': 'Sadness', 'intensity': '3', 'reason': 'it was sad'}, {'emotion': 'Sadness', 'intensity': '4', 'reason': "Her mother is pitiful. I can't imagine how does she feel."}, {'emotion': 'Contentment', 'intensity': '3', 'reason': "Don't understand the meaning of this news"}, {'emotion': 'Contentment', '…	[{'emotion': 'Awe', 'intensity': '4', 'reason': "Looking at the faces of the people in the photo, things don't look very good. So I feel a little bit afraid."}, {'emotion': 'Fear', 'intensity': '3', 'reason': "the person's political view does not align with my political view\r\n"}, {'emotion': 'Sadness', 'intensity': '4', 'reason': 'Is it a situation announcement of a gun violence incident? If it…	[{'emotion': 'Sadness', 'intensity': '1', 'reason': 'Their facial expression makes me feel serious ', 'url': 'anonymous-source/all_shooting_images_newest/90369.jpg'}, {'emotion': 'Sadness', 'intensity': '3', 'reason': 'sad', 'url': 'anonymous-source/all_shooting_images_newest/90369.jpg'}, {'emotion': 'Sadness', 'intensity': '4', 'reason': "It's so horrible that a man had to experience the death o…
293	School Shootings in America So Common that Students Are Being Taught How to Stop Bleeding of Shot Classmates	anonymous-source/all_shooting_images_newest/110026.jpg	[{'emotion': 'Sadness', 'intensity': '5', 'reason': "What's wrong with this world..."}, {'emotion': 'Contentment', 'intensity': '3', 'reason': 'not much to say'}, {'emotion': 'Sadness', 'intensity': '3', 'reason': 'No effective action has been taken to decrease school shootings.'}, {'emotion': 'Fear', 'intensity': '4', 'reason': 'There are 11 people dead because of this hate crime'}, {'emotion': …	[{'emotion': 'Fear', 'intensity': '4', 'reason': 'This is what it looks like after the situation is over. Seeing that even FBI came, it must have been a serious situation, but I can feel their troubles.'}, {'emotion': 'Sadness', 'intensity': '3', 'reason': 'law enforcement has not been supportive of BIPOC people\r\n'}, {'emotion': 'Sadness', 'intensity': '5', 'reason': 'A gun violence incident ha…	[{'emotion': 'Fear', 'intensity': '3', 'reason': 'The picture makes me feel scared.', 'url': 'anonymous-source/all_shooting_images_newest/110026.jpg'}, {'emotion': 'Anger', 'intensity': '3', 'reason': 'anger', 'url': 'anonymous-source/all_shooting_images_newest/110026.jpg'}, {'emotion': 'Sadness', 'intensity': '5', 'reason': 'The fact that kids have to learn how to stop bleeding is so sad. ', 'ur…
294	Corporate America throws weight behind gun controls	anonymous-source/all_shooting_images_newest/10747.jpg	[{'emotion': 'Excitement', 'intensity': '3', 'reason': 'They should be.'}, {'emotion': 'Sadness', 'intensity': '3', 'reason': 'not sure how to feel'}, {'emotion': 'Contentment', 'intensity': '3', 'reason': 'I want to know what role does corporate play in gun control.'}, {'emotion': 'Excitement', 'intensity': '4', 'reason': 'Big investors have larger power as gun makers'}, {'emotion': 'Excitement'…	[{'emotion': 'Awe', 'intensity': '2', 'reason': 'A sense of alienation is felt as the gun photo is located between the familiar plane and the street. But no more and no less than that feeling.'}, {'emotion': 'Anger', 'intensity': '3', 'reason': 'so much money is spent on guns \r\n'}, {'emotion': 'Sadness', 'intensity': '1', 'reason': 'How do these three pictures connect together? Is someone broug…	[{'emotion': 'Amusement', 'intensity': '1', 'reason': 'no feeling', 'url': 'anonymous-source/all_shooting_images_newest/10747.jpg'}, {'emotion': 'Fear', 'intensity': '3', 'reason': 'fear', 'url': 'anonymous-source/all_shooting_images_newest/10747.jpg'}, {'emotion': 'Excitement', 'intensity': '3', 'reason': "It's great that major companies are starting to recognize and take a stand against somethi…
[truncated: 1,002 more rows]
