# Supplementary material
Source: ML conference proceedings conference paper supplement (https://aclanthology.org/2022.aacl-main.29)
Supplement: Dataset [file 2022.aacl-main.29.Dataset.zip › NEmoP/README.pdf]

# Datasets

July 14, 2022

- **NEmo<sup>+</sup>**:
  - description: 1297 news items (image + headline text) with each news item having 10 emotional reactions (emotion category, intensity, free flow text explanations) for all three conditions  $T$ ,  $I$ ,  $TI$ .
  - location: `NEmoP.csv`
- **NEmo<sup>+</sup>-Consensus**:
  - description: subsets of the NEmo<sup>+</sup> dataset with emotional consensus.
  - **NEmo<sup>+</sup>-CR**:
    - \* description: filtered to only keep news items that have a rank difference of greater than or equal to  $\tau_{\text{rank}} = 3$  in the emotional responses
    - \* location: `NEmoP-Consensus/NEmoP-CR`
  - **NEmo<sup>+</sup>-CE**:
    - \* description: filtered with entropy. We selected the entropy filtering threshold so that the resulting filtered dataset is similar in size to **NEmo<sup>+</sup>-CR**.
    - \* location: `NEmoP-Consensus/NEmoP-CE`
